# Supplementary material for: Naturally occurring variation in gene-associated transposable elements impacts gene expression and phenotypic diversity in woodland strawberry
Source: Research Square preprint supplement (doi:10.21203/rs.3.rs-6266511/v1), 2025-04-22
Supplement: Supplementary file 2 [file 535720577b2700020f8edd18.xlsx]

## Sheet: TE_intact_length_statistics
Category	Classification	Mean Length	Max Length
LTR	Unclassified	3739.88	14627
	Copia	5414.84	18926
	Gypsy	6341.08	19715
nLTR	Unclassified	1306	1306
	DIRS	5229.33	6504
	LINE_L1	3094.47	6103
	PLE	2737.18	7772
	SINE_tRNA	265	279
MITE	Unclassified	375.204	1154
	CACTA	412.538	1013
	Harbinger	348.061	797
	Mutator	447.359	1056
	TcMar	404.957	738
	hAT	575.459	1604
DNA (nMITE)	Unclassified	3162.66	12723
	CACTA	4119.1	19819
	Harbinger	5341.19	8942
	Mutator	2321.31	15225
	P	0	0
	TcMar	3009.95	9212
	hAT	1992.21	11028
Helitron	Helitron	4859.66	17596

## Sheet: All_TE_length_statistics
Category	Classification	Mean Length	Max Length
LTR	Unclassified	444.771	14627
	Copia	699.92	18926
	Gypsy	821.02	19715
nLTR	Unclassified	620.25	1306
	DIRS	617.075	6504
	LINE_L1	525.739	6103
	PLE	459.232	7772
	SINE_tRNA	158.087	1721
MITE	Unclassified	255.914	1227
	CACTA	269.619	1013
	Harbinger	262.681	2120
	Mutator	283.136	1056
	TcMar	232.709	738
	hAT	335.761	1604
DNA (nMITE)	Unclassified	442.237	12723
	CACTA	676.87	19819
	Harbinger	840.387	8942
	Mutator	385.239	15225
	P	1127.5	1850
	TcMar	502.432	9212
	hAT	493.2	13032
Helitron	Helitron	498.211	17596
