# Supplementary material for: Naturally occurring variation in gene-associated transposable elements impacts gene expression and phenotypic diversity in woodland strawberry
Source: Research Square preprint supplement (doi:10.21203/rs.3.rs-6266511/v1), 2025-04-22
Supplement: Supplementary file 3 [file 701c075df526dbd4cea0aa78.xlsx]

## Sheet: MITEs & Genes- Leaf vs Immature
MITE_ID	log2FoldChange	padj	Coords	Gene_Chr	Gene_Start	Gene_End	Gene_ID	Gene_Strand	Distance_MITE_from_Gene	Location_MITE_from_Gene	log2FC_gene_LeafvsWhite	padj_gene_LeafvsWhite	BLAST	InterPro	GO Term	GO Accession
TE_homo_71363	-11.351	1.46143e-05	Fvb4:16317709-16318313	Fvb4	16320248	16323880	FvH4_4g12660	+	1936	Upstream TSS	-0.760149	0.0975916	AT4G21800.2 | P-loop containing nucleoside triphosphate hydrolases superfamily protein | Chr4:11573289-11574976 FORWARD LENGTH=379 | 201606; PREDICTED: GPN-loop GTPase 1 [Fragaria vesca subsp. vesca]; sp|Q8W586|QQT2_ARATH GPN-loop GTPase QQT2 OS=Arabidopsis thaliana OX=3702 GN=QQT2 PE=1 SV=1; tr|A0A2P6QVM0|A0A2P6QVM0_ROSCH GPN-loop GTPase OS=Rosa chinensis OX=74649 GN=RchiOBHm_Chr4g0411531 PE=3 S…	ATP_bind_1; Coil; disorder_prediction; FvH4_4g12660.t1_v4.0.a2; Gpn; P-loop containing nucleoside triphosphate hydrolases; P-loop_NTPase; Ras_like_GTPase; ; XPA-BINDING PROTEIN 1-RELATED	NA	NA
TE_homo_125377	-10.1825	0.000201035	Fvb7:4397859-4397941	Fvb7	4398984	4399398	FvH4_7g03860	+	1044	Upstream TSS	NA	NA	NA	FvH4_7g03860.t1_v4.0.a2	NA	NA
TE_homo_106571	-9.06268	0.00947113	Fvb6:14221651-14222256	Fvb6	14222486	14223077	FvH4_6g20640	+	231	Upstream TSS	NA	NA	AT5G02850.1 | hydroxyproline-rich glycoprotein family protein | Chr5:652159-653439 FORWARD LENGTH=426 | 201606; PREDICTED: mediator of RNA polymerase II transcription subunit 4-like [Fragaria vesca subsp. vesca]; sp|Q9LZ00|MED4_ARATH Mediator of RNA polymerase II transcription subunit 4 OS=Arabidopsis thaliana OX=3702 GN=MED4 PE=1 SV=1; tr|A0A315AP18|A0A315AP18_PRUYE Mediator of RNA polymerase II…	Coil; disorder_prediction; FvH4_6g20640.t1_v4.0.a2; Generic Transcription Pathway; Med4; mediator complex; Mediator_Med4; MEDIATOR OF RNA POLYMERASE II TRANSCRIPTION SUBUNIT 4; PPARA activates gene expression; regulation of transcription by RNA polymerase II; Transcriptional regulation of white adipocyte differentiation; transcription coregulator activity	mediator complex; regulation of transcription by RNA polymerase II; transcription coregulator activity	GO:0003712; GO:0006357; GO:0016592
TE_homo_106571	-9.06268	0.00947113	Fvb6:14221651-14222256	Fvb6	14218162	14219329	FvH4_6g20630	+	2322	Downstream TTS	NA	NA	AT5G06490.1 | RING/U-box superfamily protein | Chr5:1977996-1978589 REVERSE LENGTH=197 | 201606; PREDICTED: RING-H2 finger protein ATL70-like [Fragaria vesca subsp. vesca]; sp|Q9FG21|ATL71_ARATH Putative RING-H2 finger protein ATL71 OS=Arabidopsis thaliana OX=3702 GN=ATL71 PE=3 SV=1; tr|M5VS68|M5VS68_PRUPE Uncharacterized protein OS=Prunus persica OX=3760 GN=PRUPE_7G092500 PE=4 SV=1	FAMILY NOT NAMED; FvH4_6g20630.t1_v4.0.a2; RING-H2_PA-TM-RING; RING/U-box; ; zf-RING_2; ZF_RING_2; Znf_RING; Znf_RING/FYVE/PHD	NA	NA
TE_homo_96242	-8.68451	0.0268611	Fvb5:25711950-25712306	Fvb5	25715295	25717338	FvH4_5g35160	-	2990	Downstream TTS	NA	NA	AT5G06900.1 | cytochrome P450%2C family 93%2C subfamily D%2C polypeptide 1 | Chr5:2136160-2137925 REVERSE LENGTH=507 | 201606; PREDICTED: licodione synthase-like [Fragaria vesca subsp. vesca]; sp|P93149|C93B1_GLYEC Licodione synthase OS=Glycyrrhiza echinata OX=46348 GN=CYP93B1 PE=1 SV=2; tr|A0A2P6QI75|A0A2P6QI75_ROSCH Putative licodione synthase OS=Rosa chinensis OX=74649 GN=RchiOBHm_Chr5g0062571…	Cytochrome P450; CYTOCHROME_P450; Cyt_P450; Cyt_P450_CS; Cyt_P450_E_grp-I; Cyt_P450_sf; EP450I; FAMILY NOT NAMED; FvH4_5g35160.t1_v4.0.a2; heme binding; iron ion binding; oxidation-reduction process; oxidoreductase activity, acting on paired donors, with incorporation or reduction of molecular oxygen; p450; P450	heme binding; iron ion binding; obsolete oxidation-reduction process; oxidoreductase activity, acting on paired donors, with incorporation or reduction of molecular oxygen	GO:0005506; GO:0016705; GO:0020037; GO:0055114
TE_homo_75506	-8.55345	0.0171574	Fvb4:21740762-21741091	Fvb4	21738999	21739766	FvH4_4g17750	-	996	Upstream TSS	NA	NA	AT2G47810.1 | nuclear factor Y%2C subunit B5 | Chr2:19582938-19583420 REVERSE LENGTH=160 | 201606; PREDICTED: nuclear transcription factor Y subunit B-4-like [Fragaria vesca subsp. vesca]; sp|O82248|NFYB5_ARATH Nuclear transcription factor Y subunit B-5 OS=Arabidopsis thaliana OX=3702 GN=NFYB5 PE=1 SV=1; tr|A0A2P6QY85|A0A2P6QY85_ROSCH Putative transcription factor Hap3/NF-YB family OS=Rosa chinen…	Activation of gene expression by SREBF (SREBP); ATF4 activates genes in response to endoplasmic reticulum stress; ATF6 (ATF6-alpha) activates chaperone genes; CBFA_NFYB_domain; CBFD_NFYB_HMF; CCAAT-BINDING TRANSCRIPTION FACTOR-RELATED; CCAATSUBUNTA; disorder_prediction; FOXO-mediated transcription of cell death genes; FvH4_4g17750.t1_v4.0.a2; Histone-fold; NFYB_HAP3; nucleus; PPARA activates gene…	nucleus; protein heterodimerization activity; regulation of DNA-templated transcription; sequence-specific DNA binding	GO:0005634; GO:0006355; GO:0043565; GO:0046982
TE_homo_105238	-8.54901	0.0172601	Fvb6:12505092-12505533	Fvb6	12507429	12507765	FvH4_6g18912	-	1897	Downstream TTS	NA	NA	NA	FvH4_6g18912.t1_v4.0.a2	NA	NA
TE_struc_892	-8.45399	0.0172093	Fvb3:7170601-7171193	Fvb3	7172985	7175273	FvH4_3g12100	+	1793	Upstream TSS	1.72379	0.425032	AT1G01340.2 | cyclic nucleotide gated channel 10 | Chr1:132414-135216 REVERSE LENGTH=711 | 201606; PREDICTED: probable cyclic nucleotide-gated ion channel 3 [Fragaria vesca subsp. vesca]; sp|Q9LNJ0|CNG10_ARATH Probable cyclic nucleotide-gated ion channel 10 OS=Arabidopsis thaliana OX=3702 GN=CNGC10 PE=2 SV=2; tr|A0A2P6SDL6|A0A2P6SDL6_ROSCH Putative potassium channel, voltage-dependent, ERG OS=Ros…	cAMP-binding domain-like; CAP_ED; cNMP-bd_dom; cNMP-bd-like; CNMP_BINDING_3; CYCLIC NUCLEOTIDE-GATED ION CHANNEL 1; FAMILY NOT NAMED; FvH4_3g12100.t1_v4.0.a2; RmlC-like_jellyroll	NA	NA
TE_homo_133923	-8.30604	0.0186486	Fvb7:21623020-21623249	Fvb7	21615738	21621801	FvH4_7g29360	-	1219	Upstream TSS	1.14138	0.0552439	AT4G25540.1 | homolog of DNA mismatch repair protein MSH3 | Chr4:13042700-13048115 REVERSE LENGTH=1081 | 201606; PREDICTED: DNA mismatch repair protein MSH3 [Fragaria vesca subsp. vesca]; sp|O65607|MSH3_ARATH DNA mismatch repair protein MSH3 OS=Arabidopsis thaliana OX=3702 GN=MSH3 PE=1 SV=2; tr|A0A2P6SN39|A0A2P6SN39_ROSCH Putative DNA mismatch repair protein MutS OS=Rosa chinensis OX=74649 GN=Rch…	ABC_MSH3_euk; ATP binding; Coil; Defective Mismatch Repair Associated With MSH2; disorder_prediction; DNA_MISMATCH_REPAIR_2; DNA_mismatch_repair_MutS_C; DNA_mismatch_repair_MutS_core; DNA_mismatch_repair_MutS-lik_N; DNA_mismatch_repair_MutS/MSH; DNA_mismatch_repair_MutS_N; DNA_mismatch_repair_MutS_sf; DNA MISMATCH REPAIR PROTEIN MSH3; DNA MISMATCH REPAIR PROTEIN MUTS FAMILY MEMBER; DNA_mmatch_rep…	ATP binding; mismatched DNA binding; mismatch repair	GO:0005524; GO:0006298; GO:0030983
TE_homo_133923	-8.30604	0.0186486	Fvb7:21623020-21623249	Fvb7	21625074	21627561	FvH4_7g29361	+	1826	Upstream TSS	NA	NA	NA	disorder_prediction; FvH4_7g29361.t1_v4.0.a2	NA	NA
TE_homo_47154	-8.29213	0.0165545	Fvb3:23468981-23469247	Fvb3	23469840	23471776	FvH4_3g30250	-	594	Downstream TTS	NA	NA	AT5G22860.8 | Serine carboxypeptidase S28 family protein | Chr5:7641322-7642945 REVERSE LENGTH=366 | 201606; lysosomal Pro-X carboxypeptidase-like isoform X2 [Quercus suber]; sp|Q5RBU7|PCP_PONAB Lysosomal Pro-X carboxypeptidase OS=Pongo abelii OX=9601 GN=PRCP PE=2 SV=1; tr|A0A371H526|A0A371H526_MUCPR Lysosomal Pro-X carboxypeptidase (Fragment) OS=Mucuna pruriens OX=157652 GN=PRCP PE=4 SV=1	AB_hydrolase; alpha/beta-Hydrolases; FvH4_3g30250.t1_v4.0.a2; Peptidase_S28; PROTEASE S28 PRO-X CARBOXYPEPTIDASE-RELATED; proteolysis; Ser_carbopepase_S28_SKS; serine-type peptidase activity;	proteolysis; serine-type peptidase activity	GO:0006508; GO:0008236
TE_homo_52665	-8.25592	0.012707	Fvb3:29726221-29726494	Fvb3	29724313	29724544	FvH4_3g34240	+	1677	Downstream TTS	NA	NA	AT2G01710.1 | Chaperone DnaJ-domain superfamily protein | Chr2:315836-316771 FORWARD LENGTH=311 | 201606; PREDICTED: uncharacterized protein LOC101294174 [Fragaria vesca subsp. vesca]; sp|Q9UXR9|DNAJ_METTE Chaperone protein DnaJ OS=Methanosarcina thermophila OX=2210 GN=dnaJ PE=3 SV=1; tr|A6XN08|A6XN08_PRUPE Uncharacterized protein OS=Prunus persica OX=3760 GN=PRUPE_1G531000 PE=4 SV=1	CHAPERONE DNAJ-DOMAIN SUPERFAMILY PROTEIN; Chaperone J-domain; DnaJ; DNAJ_2; DnaJ_domain; FAMILY NOT NAMED; FvH4_3g34240.t1_v4.0.a2; JDOMAIN; J_dom_sf	NA	NA
TE_homo_100759	-8.1092	0.0212373	Fvb6:4743110-4743200	Fvb6	4738846	4742932	FvH4_6g07960	+	178	Downstream TTS	NA	NA	AT1G11340.1 | G-type lectin S-receptor-like Serine/Threonine-kinase | Chr1:3814116-3817216 REVERSE LENGTH=833 | 201606; G-type lectin S-receptor-like serine/threonine-protein kinase At1g11410 isoform X1 [Rosa chinensis]; sp|Q9ZT07|RKS1_ARATH G-type lectin S-receptor-like serine/threonine-protein kinase RKS1 OS=Arabidopsis thaliana OX=3702 GN=RKS1 PE=3 SV=3; tr|A0A2P6Q341|A0A2P6Q341_ROSCH Uncharac…	alpha-D-mannose-specific plant lectins; ATP binding; B_lectin; BULB_LECTIN; Bulb-type_lectin_dom; Bulb-type_lectin_dom_sf; FAMILY NOT NAMED; FvH4_6g07960.t1_v4.0.a2; Human cytomegalovirus infection; Human immunodeficiency virus 1 infection; Human papillomavirus infection; Kinase-like_dom_sf; mTOR signaling pathway; PAN; PAN_2; Pan_app; PAN_AP_plant; PI3K-Akt signaling pathway; Pkinase_Tyr; protei…	ATP binding; protein kinase activity; protein phosphorylation; protein serine/threonine kinase activity; recognition of pollen	GO:0004672; GO:0004674; GO:0005524; GO:0006468; GO:0048544
TE_homo_26804	-8.06367	0.0271576	Fvb2:17253476-17253634	Fvb2	17253813	17254990	FvH4_2g20580	+	180	Upstream TSS	-0.0513378	0.966486	AT5G43970.1 | translocase of outer membrane 22-V | Chr5:17692888-17693187 FORWARD LENGTH=99 | 201606; PREDICTED: mitochondrial import receptor subunit TOM9-2 [Fragaria vesca subsp. vesca]; sp|Q9FNC9|TOM92_ARATH Mitochondrial import receptor subunit TOM9-2 OS=Arabidopsis thaliana OX=3702 GN=TOM9-2 PE=1 SV=3; tr|A0A2P6PUW2|A0A2P6PUW2_ROSCH Putative mitochondrial import receptor subunit Tom22 OS=Ros…	disorder_prediction; FAMILY NOT NAMED; FvH4_2g20580.t1_v4.0.a2; intracellular protein transport; mitochondrial outer membrane; Mitochondrial protein import; Pink/Parkin Mediated Mitophagy; Tom22; Tom22_pln; TOM9-2_plant	intracellular protein transport; mitochondrial outer membrane	GO:0005741; GO:0006886
TE_homo_22556	-8.00002	0.0139872	Fvb2:11032753-11033103	Fvb2	11035379	11040775	FvH4_2g12570	+	2277	Upstream TSS	2.76477	0.0133318	AT5G09360.1 | laccase 14 | Chr5:2906426-2908658 REVERSE LENGTH=569 | 201606; PREDICTED: putative laccase-9 [Fragaria vesca subsp. vesca]; sp|Q6Z8L2|LAC9_ORYSJ Putative laccase-9 OS=Oryza sativa subsp. japonica OX=39947 GN=LAC9 PE=3 SV=1; tr|A0A2P6PRE3|A0A2P6PRE3_ROSCH Laccase OS=Rosa chinensis OX=74649 GN=RchiOBHm_Chr6g0273101 PE=3 SV=1	apoplast; copper ion binding; Cu-oxidase; Cu-oxidase_2; Cu-oxidase_3; Cupredoxin; Cupredoxins; CuRO_1_LCC; CuRO_1_LCC_plant; CuRO_2_LCC; CuRO_2_LCC_plant; FvH4_2g12570.t1_v4.0.a2; hydroquinone:oxygen oxidoreductase activity; Justicidin B biosynthesis; Laccase; lignin catabolic process; Matairesinol biosynthesis; MULTI-COPPER OXIDASE; oxidation-reduction process; oxidoreductase activity; Sesamin b…	apoplast; copper ion binding; hydroquinone:oxygen oxidoreductase activity; lignin catabolic process; obsolete oxidation-reduction process; oxidoreductase activity	GO:0005507; GO:0016491; GO:0046274; GO:0048046; GO:0052716; GO:0055114
TE_homo_124454	-7.79684	0.0477812	Fvb7:3205657-3205936	Fvb7	3208758	3217208	FvH4_7g02900	+	2823	Upstream TSS	NA	NA	AT1G15120.1 | Ubiquinol-cytochrome C reductase hinge protein | Chr1:5203091-5203897 FORWARD LENGTH=69 | 201606; PREDICTED: cytochrome b-c1 complex subunit 6-like [Fragaria vesca subsp. vesca]; sp|P48504|QCR6_SOLTU Cytochrome b-c1 complex subunit 6 OS=Solanum tuberosum OX=4113 PE=1 SV=2; tr|A0A314XSR3|A0A314XSR3_PRUYE Cytochrome b-c1 complex subunit 6-like OS=Prunus yedoensis var. nudiflora OX=209…	Bc1_11K; Cyt_b-c1_6; FvH4_7g02900.t1_v4.0.a2; mitochondrial electron transport, ubiquinol to cytochrome c; Non-heme 11 kDa protein of cytochrome bc1 complex (Ubiquinol-cytochrome c reductase); ; ubiquinol-cytochrome-c reductase activity; UBIQUINOL-CYTOCHROME C REDUCTASE COMPLEX 7.8 KDA PROTEIN; Ubol_cytC_Rdtase_hinge_dom; Ubol_cytC_Rdtase_hinge_dom_sf; UCR_hinge	mitochondrial electron transport, ubiquinol to cytochrome c; ubiquinol-cytochrome-c reductase activity	GO:0006122; GO:0008121
TE_homo_8932	-7.65199	0.00254269	Fvb1:17511739-17512186	Fvb1	17513529	17518240	FvH4_1g25670	+	1344	Upstream TSS	2.07322	4.62792e-08	AT4G39630.1 | translation initiation factor | Chr4:18397749-18399263 REVERSE LENGTH=233 | 201606; PREDICTED: uncharacterized protein LOC101313156 [Fragaria vesca subsp. vesca] &gt;gi|764521119|ref|XP_011469788.1| PREDICTED: uncharacterized protein LOC101313156 [Fragaria vesca subsp. vesca] &gt;gi|764521124|ref|XP_011469792.1| PREDICTED: uncharacterized protein LOC101313156 [Fragaria vesca subsp. …	Coil; disorder_prediction; FAMILY NOT NAMED; FvH4_1g25670.t1_v4.0.a2	NA	NA
TE_homo_8932	-7.65199	0.00254269	Fvb1:17511739-17512186	Fvb1	17506389	17511009	FvH4_1g25660	+	730	Downstream TTS	0.702957	0.348889	AT1G29900.1 | carbamoyl phosphate synthetase B | Chr1:10468164-10471976 FORWARD LENGTH=1187 | 201606; PREDICTED: carbamoyl-phosphate synthase large chain, chloroplastic [Fragaria vesca subsp. vesca]; sp|Q42601|CARB_ARATH Carbamoyl-phosphate synthase large chain, chloroplastic OS=Arabidopsis thaliana OX=3702 GN=CARB PE=1 SV=1; tr|A0A2P6RT81|A0A2P6RT81_ROSCH Putative carbamoyl-phosphate synthase (G…	Alanine, aspartate and glutamate metabolism; ATP binding; ATP-grasp; ATP_GRASP; CAD PROTEIN; Carbamoyl phosphate synthetase, large subunit connection domain; CarbamoylP_synth_lsu; CarbamoylP_synth_lsu_oligo; CarbamoylP_synth_lsu_oligo_sf; CARBAMOYLTRANSFERASE FAMILY MEMBER; CbamoylP_synth_lsu_CPSase_dom; CbamoylP_synth_lsu-like_ATP-bd; CPSASE; CPSASE_1; CPSASE_2; CPSase_L_chain_A; CPSase_L_chain_…	ATP binding; metal ion binding; obsolete nitrogen compound metabolic process	GO:0005524; GO:0006807; GO:0046872
TE_homo_86682	-7.15238	0.00115579	Fvb5:11857779-11858038	Fvb5	11854268	11855510	FvH4_5g20100	-	2269	Upstream TSS	NA	NA	AT2G22740.2 | SU(VAR)3-9 homolog 6 | Chr2:9664256-9666628 REVERSE LENGTH=790 | 201606; PREDICTED: YDG domain-containing protein At5g47150-like [Fragaria vesca subsp. vesca] &gt;gi|764591237|ref|XP_011465235.1| PREDICTED: YDG domain-containing protein At5g47150-like [Fragaria vesca subsp. vesca] &gt;gi|764591243|ref|XP_011465236.1| PREDICTED: YDG domain-containing protein At5g47150-like [Fragaria …	disorder_prediction; FAMILY NOT NAMED; FvH4_5g20100.t1_v4.0.a2; HISTONE-LYSINE N-METHYLTRANSFERASE, H3 LYSINE-9 SPECIFIC SUVH5-RELATED; PUA domain-like; PUA-like_sf; SAD_SRA; SRA_YDG; SRA-YDG_sf; YDG	NA	NA
TE_struc_1083	-7.14896	0.00558562	Fvb3:19959079-19959445	Fvb3	19953728	19958018	FvH4_3g26810	-	1061	Upstream TSS	-0.740575	0.0769069	AT1G43770.3 | RING/FYVE/PHD zinc finger superfamily protein | Chr1:16548509-16550257 FORWARD LENGTH=431 | 201606; PREDICTED: uncharacterized protein LOC101308361 isoform X3 [Fragaria vesca subsp. vesca]; tr|A0A2P6PSC6|A0A2P6PSC6_ROSCH Putative chromatin regulator PHD family OS=Rosa chinensis OX=74649 GN=RchiOBHm_Chr6g0276691 PE=4 SV=1	FAMILY NOT NAMED; FvH4_3g26810.t1_v4.0.a2; FYVE/PHD zinc finger; ; Znf_FYVE_PHD	NA	NA
TE_struc_1083	-7.14896	0.00558562	Fvb3:19959079-19959445	Fvb3	19960345	19971224	FvH4_3g26820	-	901	Downstream TTS	1.85279	0.000738054	AT3G44050.1 | P-loop containing nucleoside triphosphate hydrolases superfamily protein | Chr3:15818738-15824792 FORWARD LENGTH=1263 | 201606; PREDICTED: phragmoplast orienting kinesin-1 isoform X2 [Fragaria vesca subsp. vesca]; sp|F4J1U4|KN12E_ARATH Kinesin-like protein KIN-12E OS=Arabidopsis thaliana OX=3702 GN=KIN12E PE=3 SV=1; tr|A0A2P6QET2|A0A2P6QET2_ROSCH Putative plus-end-directed kinesin A…	ATP binding; Coil; COPI-dependent Golgi-to-ER retrograde traffic; disorder_prediction; FAMILY NOT NAMED; FvH4_3g26820.t1_v4.0.a2; Kinesin; KINESINHEAVY; KINESIN_MOTOR_1; KINESIN_MOTOR_2; Kinesin_motor_CS; Kinesin_motor_dom; Kinesin_motor_dom_sf; Kinesins; microtubule-based movement; microtubule binding; microtubule motor activity; P-loop containing nucleoside triphosphate hydrolases; P-loop_NTPas…	ATP binding; microtubule-based movement; microtubule binding; microtubule motor activity	GO:0003777; GO:0005524; GO:0007018; GO:0008017
TE_homo_72574	-7.03115	0.0417018	Fvb4:17972688-17972794	Fvb4	17973302	17976422	FvH4_4g14360	+	509	Upstream TSS	1.36605	0.193397	AT5G53130.1 | cyclic nucleotide gated channel 1 | Chr5:21537830-21540490 REVERSE LENGTH=716 | 201606; PREDICTED: cyclic nucleotide-gated ion channel 1-like [Fragaria vesca subsp. vesca]; sp|O65717|CNGC1_ARATH Cyclic nucleotide-gated ion channel 1 OS=Arabidopsis thaliana OX=3702 GN=CNGC1 PE=1 SV=1; tr|A0A251NEN2|A0A251NEN2_PRUPE Uncharacterized protein OS=Prunus persica OX=3760 GN=PRUPE_7G210600 P…	cAMP-binding domain-like; CAP_ED; cNMP-bd_dom; cNMP-bd-like; CNMP_BINDING_3; Coil; CYCLIC NUCLEOTIDE-GATED ION CHANNEL 1; FAMILY NOT NAMED; FvH4_4g14360.t1_v4.0.a2; RmlC-like_jellyroll; Voltage-gated potassium channels	NA	NA
TE_homo_72574	-7.03115	0.0417018	Fvb4:17972688-17972794	Fvb4	17968335	17970547	FvH4_4g14350	+	2141	Downstream TTS	NA	NA	AT1G79910.1 | Regulator of Vps4 activity in the MVB pathway protein | Chr1:30055050-30057011 FORWARD LENGTH=381 | 201606; PREDICTED: protein IWS1 homolog A [Fragaria vesca subsp. vesca]; tr|A0A2P6RWS2|A0A2P6RWS2_ROSCH Putative vacuolar protein sorting-associated protein Ist1 OS=Rosa chinensis OX=74649 GN=RchiOBHm_Chr2g0138021 PE=4 SV=1	FvH4_4g14350.t1_v4.0.a2; Ist1; IST1-like; Neutrophil degranulation; protein transport; ; UNCHARACTERIZED DUF292	protein transport	GO:0015031
TE_homo_71292	-6.64357	0.00679275	Fvb4:16182015-16182375	Fvb4	16182580	16184287	FvH4_4g12502	+	206	Upstream TSS	NA	NA	ATMG00860.1 | DNA/RNA polymerases superfamily protein | ChrM:235916-236392 FORWARD LENGTH=158 | 201606; putative nucleotidyltransferase, Ribonuclease H [Rosa chinensis]; sp|Q99315|YG31B_YEAST Transposon Ty3-G Gag-Pol polyprotein OS=Saccharomyces cerevisiae (strain ATCC 204508 / S288c) OX=559292 GN=TY3B-G PE=1 SV=3; tr|A0A2P6RJJ0|A0A2P6RJJ0_ROSCH Putative nucleotidyltransferase, Ribonuclease H OS=…	DNA integration; DNA/RNA polymerases; FAMILY NOT NAMED; FvH4_4g12502.t1_v4.0.a2; INTEGRASE; Integrase_cat-core; Integrase_H2C2; nucleic acid binding; Ribonuclease H-like; RNase_HI_RT_Ty3; RNaseH-like_sf; RNaseH_sf; RT_dom; RT_LTR; RT_RNaseH_2; RVT_1;	DNA integration; nucleic acid binding	GO:0003676; GO:0015074
TE_homo_71292	-6.64357	0.00679275	Fvb4:16182015-16182375	Fvb4	16184466	16185087	FvH4_4g12503	+	2092	Upstream TSS	NA	NA	putative nucleotidyltransferase, Ribonuclease H [Rosa chinensis]; sp|Q99315|YG31B_YEAST Transposon Ty3-G Gag-Pol polyprotein OS=Saccharomyces cerevisiae (strain ATCC 204508 / S288c) OX=559292 GN=TY3B-G PE=1 SV=3; tr|A0A2P6R7G4|A0A2P6R7G4_ROSCH Putative nucleotidyltransferase, Ribonuclease H OS=Rosa chinensis OX=74649 GN=RchiOBHm_Chr3g0457081 PE=4 SV=1	Chromo domain-like; Chromo-like_dom_sf; FAMILY NOT NAMED; FvH4_4g12503.t1_v4.0.a2;	NA	NA
TE_homo_32655	-6.52356	0.0131579	Fvb3:2404947-2405280	Fvb3	2402869	2403688	FvH4_3g04260	-	1259	Upstream TSS	-1.51116	0.416936	AT3G08600.1 | transmembrane protein%2C putative (DUF1191) | Chr3:2612646-2613596 FORWARD LENGTH=316 | 201606; PREDICTED: uncharacterized protein LOC105350286 [Fragaria vesca subsp. vesca]; tr|A0A2P6R881|A0A2P6R881_ROSCH Uncharacterized protein OS=Rosa chinensis OX=74649 GN=RchiOBHm_Chr3g0459851 PE=4 SV=1	disorder_prediction; DUF1191; FAMILY NOT NAMED; FvH4_3g04260.t1_v4.0.a2;	NA	NA
TE_homo_115755	-6.3225	0.028909	Fvb6:26177170-26177401	Fvb6	26178778	26179324	FvH4_6g33081	+	1378	Upstream TSS	NA	NA	AT4G31860.2 | Protein phosphatase 2C family protein | Chr4:15407116-15408589 REVERSE LENGTH=275 | 201606; hypothetical protein LR48_Vigan04g227200 [Vigna angularis]; sp|Q9SZ53|P2C60_ARATH Probable protein phosphatase 2C 60 OS=Arabidopsis thaliana OX=3702 GN=At4g31860 PE=2 SV=1; tr|A0A0L9UHQ9|A0A0L9UHQ9_PHAAN Uncharacterized protein OS=Phaseolus angularis OX=3914 GN=LR48_Vigan04g227200 PE=3 SV=1	catalytic activity; FvH4_6g33081.t1_v4.0.a2; PP2C; PP2C-like; PPM-type_dom_sf; PPM-type_phosphatase_dom; protein dephosphorylation; PROTEIN PHOSPHATASE 2C; protein serine/threonine phosphatase activity; ; T cell receptor signaling pathway; Th1 and Th2 cell differentiation	catalytic activity; protein dephosphorylation; protein serine/threonine phosphatase activity	GO:0003824; GO:0004722; GO:0006470
TE_homo_115755	-6.3225	0.028909	Fvb6:26177170-26177401	Fvb6	26168712	26175698	FvH4_6g33080	+	1472	Downstream TTS	4.62089	3.97599e-13	AT3G13690.3 | kinase with adenine nucleotide alpha hydrolases-like domain-containing protein | Chr3:4486920-4490011 FORWARD LENGTH=753 | 201606; PREDICTED: inactive protein kinase SELMODRAFT_444075 [Fragaria vesca subsp. vesca]; sp|P0DH62|Y4407_SELML Inactive protein kinase SELMODRAFT_444075 OS=Selaginella moellendorffii OX=88036 GN=SELMODRAFT_444075 PE=2 SV=1; tr|A0A2P6RXY1|A0A2P6RXY1_ROSCH Unch…	ATP binding; disorder_prediction; FAMILY NOT NAMED; FvH4_6g33080.t10_v4.0.a2; FvH4_6g33080.t11_v4.0.a2; FvH4_6g33080.t12_v4.0.a2; FvH4_6g33080.t1_v4.0.a2; FvH4_6g33080.t2_v4.0.a2; FvH4_6g33080.t3_v4.0.a2; FvH4_6g33080.t4_v4.0.a2; FvH4_6g33080.t5_v4.0.a2; FvH4_6g33080.t6_v4.0.a2; FvH4_6g33080.t7_v4.0.a2; FvH4_6g33080.t9_v4.0.a2; Kinase-like_dom_sf; KINASE WITH ADENINE NUCLEOTIDE ALPHA HYDROLASES-L…	ATP binding; protein kinase activity; protein phosphorylation	GO:0004672; GO:0005524; GO:0006468
TE_homo_78825	-6.20877	0.0147828	Fvb4:27435614-27435914	Fvb4	27437458	27446024	FvH4_4g25760	+	1545	Upstream TSS	2.97456	4.1627e-07	AT1G72770.4 | HYPERSENSITIVE TO ABA1 | Chr1:27390998-27392851 FORWARD LENGTH=511 | 201606; PREDICTED: uncharacterized protein LOC101301302 isoform X1 [Fragaria vesca subsp. vesca]; sp|Q9CAJ0|P2C16_ARATH Protein phosphatase 2C 16 OS=Arabidopsis thaliana OX=3702 GN=HAB1 PE=1 SV=1; tr|A0A2P6R150|A0A2P6R150_ROSCH Putative leucine-rich repeat domain, L domain-containing protein OS=Rosa chinensis OX=74…	Adenine nucleotide alpha hydrolases-like; catalytic activity; cation binding; Coil; disorder_prediction; FvH4_4g25760.t1_v4.0.a2; L domain-like; LRR_dom_sf; PP2C; PP2C_BS; PP2Cc; PP2C-like; PPM_1; PPM_2; PPM-type_dom_sf; PPM-type_phosphatase_dom; protein dephosphorylation; PROTEIN PHOSPHATASE 2C; PROTEIN PHOSPHATASE 2C 16; protein serine/threonine phosphatase activity; Rossmann-like_a/b/a_fold; S…	catalytic activity; cation binding; protein dephosphorylation; protein serine/threonine phosphatase activity	GO:0003824; GO:0004722; GO:0006470; GO:0043169
TE_homo_78825	-6.20877	0.0147828	Fvb4:27435614-27435914	Fvb4	27431098	27432767	FvH4_4g25740	+	2847	Downstream TTS	0.0138201	0.988769	AT4G12690.2 | DUF868 family protein (DUF868) | Chr4:7480896-7481753 FORWARD LENGTH=285 | 201606; PREDICTED: uncharacterized protein LOC105351839 [Fragaria vesca subsp. vesca]; tr|A0A2P6R161|A0A2P6R161_ROSCH Uncharacterized protein OS=Rosa chinensis OX=74649 GN=RchiOBHm_Chr4g0433181 PE=4 SV=1	disorder_prediction; DUF868; DUF868_pln; FAMILY NOT NAMED; FvH4_4g25740.t1_v4.0.a2;	NA	NA
TE_struc_1943	-6.09972	6.10414e-08	Fvb5:2354580-2355227	Fvb5	2357099	2358601	FvH4_5g03930	-	1873	Downstream TTS	-2.69662	0.116192	AT3G20570.1 | early nodulin-like protein 9 | Chr3:7186754-7187453 REVERSE LENGTH=203 | 201606; PREDICTED: early nodulin-like protein 3 [Fragaria vesca subsp. vesca]; sp|Q9SK27|ENL1_ARATH Early nodulin-like protein 1 OS=Arabidopsis thaliana OX=3702 GN=At2g25060 PE=2 SV=2; tr|A0A2P6P6H1|A0A2P6P6H1_ROSCH Putative cupredoxin OS=Rosa chinensis OX=74649 GN=RchiOBHm_Chr7g0195571 PE=4 SV=1	Cu_bind_like; Cupredoxin; Cupredoxins; electron transfer activity; FAMILY NOT NAMED; FvH4_5g03930.t1_v4.0.a2; Phytocyanin; PHYTOCYANIN; Phytocyanin_dom;	electron transfer activity	GO:0009055
TE_homo_62690	-6.05044	0.0276318	Fvb4:6516175-6516440	Fvb4	6514138	6515419	FvH4_4g07100	+	756	Downstream TTS	NA	NA	AT3G06240.1 | F-box family protein | Chr3:1887336-1888619 FORWARD LENGTH=427 | 201606; PREDICTED: putative F-box protein At3g52320 [Fragaria vesca subsp. vesca]; sp|Q9LPH0|FB57_ARATH Putative F-box protein At1g53550 OS=Arabidopsis thaliana OX=3702 GN=At1g53550 PE=4 SV=2; tr|A0A314XKF2|A0A314XKF2_PRUYE F-box protein OS=Prunus yedoensis var. nudiflora OX=2094558 GN=Pyn_21281 PE=4 SV=1	FAMILY NOT NAMED; FBA_3; F-box-assoc_dom_typ3; F-box-assoc_interact_dom; F-box domain; F-box-like_dom_sf; FvH4_4g07100.t1_v4.0.a2; protein binding; TIGR01640	protein binding	GO:0005515
TE_homo_8522	-5.98884	4.24527e-42	Fvb1:16888715-16888988	Fvb1	16890451	16891268	FvH4_1g25072	+	1464	Upstream TSS	NA	NA	uncharacterized protein LOC112184339 [Rosa chinensis]	DUF4283; FvH4_1g25072.t1_v4.0.a2	NA	NA
TE_homo_28895	-5.89896	3.15416e-05	Fvb2:21335635-21335895	Fvb2	21332011	21333088	FvH4_2g26600	+	2547	Downstream TTS	NA	NA	AT4G11170.1 | Disease resistance protein (TIR-NBS-LRR class) family | Chr4:6811127-6817130 FORWARD LENGTH=1095 | 201606; PREDICTED: putative disease resistance protein At4g11170 [Fragaria vesca subsp. vesca]; sp|O82500|Y4117_ARATH Putative disease resistance protein At4g11170 OS=Arabidopsis thaliana OX=3702 GN=At4g11170 PE=2 SV=1; tr|A0A2P6PXC4|A0A2P6PXC4_ROSCH Putative TIR domain, winged helix-t…	Activation of caspases through apoptosome-mediated cleavage; ADP binding; DISEASERSIST; Formation of apoptosome; FvH4_2g26600.t1_v4.0.a2; LEUCINE-RICH REPEAT-CONTAINING PROTEIN; NB-ARC; Neutrophil degranulation; P-loop containing nucleoside triphosphate hydrolases; P-loop_NTPase; protein binding; Regulation of the apoptosome activity; signal transduction; ; SMAC (DIABLO) binds to IAPs; SMAC(DIABL…	ADP binding; protein binding; signal transduction	GO:0005515; GO:0007165; GO:0043531
TE_homo_65221	-5.59985	4.22353e-06	Fvb4:9398489-9398912	Fvb4	9400099	9400759	FvH4_4g08761	-	1188	Downstream TTS	NA	NA	PREDICTED: uncharacterized protein LOC101300186 [Fragaria vesca subsp. vesca]; tr|A0A2P6RHB6|A0A2P6RHB6_ROSCH Uncharacterized protein OS=Rosa chinensis OX=74649 GN=RchiOBHm_Chr3g0495801 PE=4 SV=1	disorder_prediction; FAMILY NOT NAMED; FvH4_4g08761.t1_v4.0.a2;	NA	NA
TE_struc_205	-5.45058	2.89042e-06	Fvb1:14390268-14390976	Fvb1	14389158	14389831	FvH4_1g22462	-	437	Upstream TSS	NA	NA	AT5G40480.1 | embryo defective 3012 | Chr5:16213361-16223982 FORWARD LENGTH=1923 | 201606; PREDICTED: nuclear pore complex protein GP210-like [Fragaria vesca subsp. vesca]; sp|F4KHD8|GP210_ARATH Nuclear pore complex protein GP210 OS=Arabidopsis thaliana OX=3702 GN=GB210 PE=1 SV=1; tr|A0A2P6S5T7|A0A2P6S5T7_ROSCH Putative invasin/intimin cell-adhesion OS=Rosa chinensis OX=74649 GN=RchiOBHm_Chr2g017…	FvH4_1g22462.t1_v4.0.a2; NUCLEAR PORE MEMBRANE GLYCOPROTEIN GP210-RELATED	NA	NA
TE_homo_112705	-5.43712	0.000744206	Fvb6:21808578-21808944	Fvb6	21802960	21806146	FvH4_6g28330	+	2432	Downstream TTS	NA	NA	AT3G06240.1 | F-box family protein | Chr3:1887336-1888619 FORWARD LENGTH=427 | 201606; PREDICTED: F-box/kelch-repeat protein At3g06240-like [Fragaria vesca subsp. vesca] &gt;gi|764605739|ref|XP_011467007.1| PREDICTED: F-box/kelch-repeat protein At3g06240-like [Fragaria vesca subsp. vesca]; sp|Q8GXC7|FBK50_ARATH F-box/kelch-repeat protein At3g06240 OS=Arabidopsis thaliana OX=3702 GN=At3g06240 PE=2…	FAMILY NOT NAMED; FBA_1; F-box; FBOX; F-box-assoc_dom_typ1; F-box-assoc_interact_dom; F-box_dom; F-box domain; F-box-like_dom_sf; FvH4_6g28330.t1_v4.0.a2; Galactose oxidase, central domain; Gal_Oxase/kelch_b-propeller; protein binding; ; TIGR01640	protein binding	GO:0005515
TE_homo_128341	-5.42098	0.00051495	Fvb7:9550723-9550815	Fvb7	9552219	9553071	FvH4_7g10112	-	1405	Downstream TTS	NA	NA	AT3G11010.6 | receptor like protein 34 | Chr3:3450988-3453672 REVERSE LENGTH=861 | 201606; PREDICTED: receptor-like protein 12 [Fragaria vesca subsp. vesca]; sp|Q9SRL2|RLP34_ARATH Receptor-like protein 34 OS=Arabidopsis thaliana OX=3702 GN=RLP34 PE=2 SV=1; tr|A0A2P6SDE3|A0A2P6SDE3_ROSCH Putative leucine-rich repeat-containing, plant-type, leucine-rich repeat domain, L OS=Rosa chinensis OX=74649 G…	disorder_prediction; FAMILY NOT NAMED; FvH4_7g10112.t1_v4.0.a2; L domain-like; Leu-rich_rpt; LRR_1; protein binding;	protein binding	GO:0005515
TE_homo_128341	-5.42098	0.00051495	Fvb7:9550723-9550815	Fvb7	9553160	9553959	FvH4_7g10113	-	2346	Downstream TTS	NA	NA	AT2G33060.1 | receptor like protein 27 | Chr2:14025661-14028087 FORWARD LENGTH=808 | 201606; receptor like protein 7-like [Rosa chinensis] &gt;gi|1358182237|gb|PRQ56711.1| putative leucine-rich repeat-containing, plant-type, leucine-rich repeat domain, L [Rosa chinensis]; sp|F4IUU1|RLP27_ARATH Receptor like protein 27 OS=Arabidopsis thaliana OX=3702 GN=RLP27 PE=2 SV=1; tr|A0A2P6SDE3|A0A2P6SDE3_RO…	FAMILY NOT NAMED; FvH4_7g10113.t1_v4.0.a2; L domain-like; Leu-rich_rpt; LEURICHRPT; LRR_1; LRR_8; LRR_dom_sf; protein binding; RECEPTOR LIKE PROTEIN 46	protein binding	GO:0005515
TE_homo_99452	-5.39446	0.000136477	Fvb6:2100372-2100945	Fvb6	2098676	2100152	FvH4_6g03892	-	220	Upstream TSS	NA	NA	NA	FvH4_6g03892.t1_v4.0.a2	NA	NA
TE_homo_99452	-5.39446	0.000136477	Fvb6:2100372-2100945	Fvb6	2101665	2102614	FvH4_6g03893	-	721	Downstream TTS	NA	NA	NA	FvH4_6g03893.t1_v4.0.a2	NA	NA
TE_homo_70940	-5.3737	0.0176598	Fvb4:15580093-15580443	Fvb4	15576479	15577998	FvH4_4g11850	+	2095	Downstream TTS	0	1	AT3G01790.2 | Ribosomal protein L13 family protein | Chr3:283880-285583 REVERSE LENGTH=205 | 201606; PREDICTED: LOW QUALITY PROTEIN: 50S ribosomal protein L13, chloroplastic-like [Fragaria vesca subsp. vesca]; sp|B8G6P5|RL13_CHLAD 50S ribosomal protein L13 OS=Chloroflexus aggregans (strain MD-66 / DSM 9485) OX=326427 GN=rplM PE=3 SV=1; tr|A0A151TQM7|A0A151TQM7_CAJCA 50S ribosomal protein L13 OS=C…	39S RIBOSOMAL PROTEIN L13, MITOCHONDRIAL; FvH4_4g11850.t1_v4.0.a2; Mitochondrial translation elongation; Mitochondrial translation initiation; Mitochondrial translation termination; Ribosomal_L13; Ribosomal_L13_bac-type; Ribosomal_L13_sf; Ribosomal protein L13; RIBOSOMAL PROTEIN L13; ribosome; structural constituent of ribosome; TIGR01066; translation	ribosome; structural constituent of ribosome; translation	GO:0003735; GO:0005840; GO:0006412
TE_homo_70940	-5.3737	0.0176598	Fvb4:15580093-15580443	Fvb4	15582516	15583388	FvH4_4g11860	-	2074	Downstream TTS	NA	NA	PREDICTED: uncharacterized protein LOC101313973 [Fragaria vesca subsp. vesca]; tr|A0A2P6SJA6|A0A2P6SJA6_ROSCH Putative post-transcriptional gene silencing PAZ-Argonaute family OS=Rosa chinensis OX=74649 GN=RchiOBHm_Chr1g0362621 PE=4 SV=1	Coil; disorder_prediction; FAMILY NOT NAMED; FvH4_4g11860.t1_v4.0.a2; NAM-associated; NAM-associated_C;	NA	NA
TE_homo_122105	-5.29051	0.00611435	Fvb6:38563061-38563735	Fvb6	38560109	38562707	FvH4_6g52310	-	354	Upstream TSS	-0.132281	0.845392	AT5G40660.1 | ATP12 protein-like protein | Chr5:16283650-16285161 REVERSE LENGTH=325 | 201606; PREDICTED: ATP synthase mitochondrial F1 complex assembly factor 2-like, partial [Fragaria vesca subsp. vesca]; sp|Q8N5M1|ATPF2_HUMAN ATP synthase mitochondrial F1 complex assembly factor 2 OS=Homo sapiens OX=9606 GN=ATPAF2 PE=1 SV=1; tr|A0A2P6S602|A0A2P6S602_ROSCH Putative ATP12, ATP synthase F1-assemb…	ATP12; ATP12_ATP_synth-F1-assembly; ATP12_ATP_synth-F1-assembly_N; ATP12-like; ATP12_ortho_dom_sf; ATP SYNTHASE MITOCHONDRIAL F1 COMPLEX ASSEMBLY FACTOR 2/ATP12 PROTEIN, MITOCHONDRIAL PRECURSOR; FvH4_6g52310.t1_v4.0.a2; proton-transporting ATP synthase complex assembly	proton-transporting ATP synthase complex assembly	GO:0043461
TE_homo_122105	-5.29051	0.00611435	Fvb6:38563061-38563735	Fvb6	38563968	38566481	FvH4_6g52311	+	234	Upstream TSS	-0.843019	0.0400361	AT5G40670.1 | PQ-loop repeat family protein / transmembrane family protein | Chr5:16285968-16287591 FORWARD LENGTH=270 | 201606; PREDICTED: cystinosin homolog isoform X2 [Fragaria vesca subsp. vesca]; sp|P57758|CTNS_ARATH Cystinosin homolog OS=Arabidopsis thaliana OX=3702 GN=At5g40670 PE=2 SV=1; tr|A0A2P6S5Z9|A0A2P6S5Z9_ROSCH Putative lysosomal cystine transporter OS=Rosa chinensis OX=74649 GN=Rc…	CYSTINOSIN; FvH4_6g52311.t1_v4.0.a2; LC_transporter; Miscellaneous transport and binding events; PQ-loop; PQ-loop_rpt; ; Transport of inorganic cations/anions and amino acids/oligopeptides	NA	NA
TE_homo_50339	-5.25396	0.0455136	Fvb3:26987783-26988036	Fvb3	26990596	26991863	FvH4_3g31921	+	2561	Upstream TSS	NA	NA	AT5G41220.3 | glutathione S-transferase THETA 3 | Chr5:16494560-16496525 REVERSE LENGTH=532 | 201606; PREDICTED: glutathione S-transferase T3-like [Fragaria vesca subsp. vesca]; sp|Q9FHE1|GSTT3_ARATH Glutathione S-transferase T3 OS=Arabidopsis thaliana OX=3702 GN=GSTT3 PE=2 SV=1; tr|A0A0A9S2P7|A0A0A9S2P7_ARUDO Uncharacterized protein OS=Arundo donax OX=35708 PE=4 SV=1	Coil; disorder_prediction; FAMILY NOT NAMED; FvH4_3g31921.t1_v4.0.a2; MYB_LIKE; Myb-like_dom; NAM-associated; NAM-associated_C	NA	NA
TE_homo_3280	-5.24843	3.39394e-09	Fvb1:8374753-8375166	Fvb1	8370251	8372309	FvH4_1g14930	+	2444	Downstream TTS	4.08895	0.267266	AT3G50440.1 | methylesterase | Chr3:18717392-18718396 REVERSE LENGTH=275 | 201606; PREDICTED: probable esterase PIR7A [Fragaria vesca subsp. vesca]; sp|Q6RYA0|SABP2_TOBAC Salicylic acid-binding protein 2 OS=Nicotiana tabacum OX=4097 GN=SABP2 PE=1 SV=1; tr|A0A2P6SB71|A0A2P6SB71_ROSCH Putative 3-oxolaurate decarboxylase OS=Rosa chinensis OX=74649 GN=RchiOBHm_Chr1g0329911 PE=4 SV=1	AB_hydrolase; AB_hydrolase_1; Abhydrolase_6; ALPHA/BETA HYDROLASE FOLD-CONTAINING PROTEIN; alpha/beta-Hydrolases; FvH4_1g14930.t1_v4.0.a2;	NA	NA
TE_homo_131067	-5.21908	0.00207383	Fvb7:14276133-14276386	Fvb7	14272811	14275166	FvH4_7g16710	-	967	Upstream TSS	NA	NA	AT1G01280.1 | cytochrome P450%2C family 703%2C subfamily A%2C polypeptide 2 | Chr1:112290-113905 FORWARD LENGTH=510 | 201606; PREDICTED: cytochrome P450 703A2 [Fragaria vesca subsp. vesca]; sp|Q7EZR4|C70A3_ORYSJ Cytochrome P450 703A2 OS=Oryza sativa subsp. japonica OX=39947 GN=CYP703A3 PE=1 SV=1; tr|A0A2P6SIK2|A0A2P6SIK2_ROSCH Putative cytochrome P450 OS=Rosa chinensis OX=74649 GN=RchiOBHm_Chr1g0…	Cytochrome P450; CYTOCHROME_P450; Cyt_P450; Cyt_P450_CS; Cyt_P450_E_grp-I; Cyt_P450_sf; EP450I; FAMILY NOT NAMED; FvH4_7g16710.t1_v4.0.a2; heme binding; iron ion binding; oxidation-reduction process; oxidoreductase activity, acting on paired donors, with incorporation or reduction of molecular oxygen; p450; P450	heme binding; iron ion binding; obsolete oxidation-reduction process; oxidoreductase activity, acting on paired donors, with incorporation or reduction of molecular oxygen	GO:0005506; GO:0016705; GO:0020037; GO:0055114
TE_homo_20965	-5.18117	0.000744206	Fvb2:8880406-8880826	Fvb2	8876948	8877786	FvH4_2g10040	-	2620	Upstream TSS	0.969441	0.208335	AT4G34630.1 | prostatic spermine-binding-like protein | Chr4:16537093-16537692 REVERSE LENGTH=199 | 201606; hypothetical protein RchiOBHm_Chr6g0266971 [Rosa chinensis]; tr|A0A2P6PPT3|A0A2P6PPT3_ROSCH Uncharacterized protein OS=Rosa chinensis OX=74649 GN=RchiOBHm_Chr6g0266971 PE=4 SV=1	disorder_prediction; FvH4_2g10040.t1_v4.0.a2	NA	NA
TE_homo_20965	-5.18117	0.000744206	Fvb2:8880406-8880826	Fvb2	8883182	8889748	FvH4_2g10050	-	2357	Downstream TTS	2.51339	1.13576e-16	AT2G21385.1 | hypothetical protein | Chr2:9149726-9151752 FORWARD LENGTH=330 | 201606; PREDICTED: uncharacterized protein LOC101295094 [Fragaria vesca subsp. vesca]; tr|A0A2P6PPW9|A0A2P6PPW9_ROSCH Uncharacterized protein OS=Rosa chinensis OX=74649 GN=RchiOBHm_Chr6g0266981 PE=4 SV=1	FAMILY NOT NAMED; FvH4_2g10050.t1_v4.0.a2	NA	NA
TE_homo_53320	-5.15694	0.0170917	Fvb3:30770089-30770418	Fvb3	30771924	30774857	FvH4_3g35860	+	1507	Upstream TSS	NA	NA	AT5G17680.2 | disease resistance protein (TIR-NBS-LRR class) | Chr5:5822999-5827153 FORWARD LENGTH=1295 | 201606; PREDICTED: TMV resistance protein N-like [Fragaria vesca subsp. vesca]; sp|Q40392|TMVRN_NICGU TMV resistance protein N OS=Nicotiana glutinosa OX=35889 GN=N PE=1 SV=1; tr|A0A2P6QMJ8|A0A2P6QMJ8_ROSCH Putative toll-like receptor, P-loop containing nucleoside triphosphate hydrolase OS=Ros…	carbohydrate binding; FAMILY NOT NAMED; FvH4_3g35860.t1_v4.0.a2; Jacalin; JACALIN_LECTIN; Jacalin-like_lectin_dom; Jacalin-like_lectin_dom_plant; Jacalin-like_lectin_dom_sf; Mannose-binding lectins; protein binding; signal transduction; ; TIR; TIR_dom; Toll/Interleukin receptor TIR domain; Toll_tir_struct_dom_sf	carbohydrate binding; protein binding; signal transduction	GO:0005515; GO:0007165; GO:0030246
TE_struc_3017	-5.14055	1.31607e-07	Fvb6:38725460-38725754	Fvb6	38726892	38727816	FvH4_6g52703	-	1139	Downstream TTS	NA	NA	putative F-box domain-containing protein [Rosa chinensis]; tr|A0A2P6SMV0|A0A2P6SMV0_ROSCH Putative F-box domain-containing protein OS=Rosa chinensis OX=74649 GN=RchiOBHm_Chr1g0376381 PE=4 SV=1	FAMILY NOT NAMED; F-box; F-box_dom; F-box domain; F-box-like_dom_sf; FvH4_6g52703.t1_v4.0.a2; protein binding;	protein binding	GO:0005515
TE_struc_3017	-5.14055	1.31607e-07	Fvb6:38725460-38725754	Fvb6	38728406	38731721	FvH4_6g52710	-	2653	Downstream TTS	-0.0404785	0.913079	AT3G26000.1 | Ribonuclease inhibitor | Chr3:9507042-9508542 REVERSE LENGTH=453 | 201606; PREDICTED: F-box protein SKIP14-like isoform X1 [Fragaria vesca subsp. vesca] &gt;gi|764612856|ref|XP_011467728.1| PREDICTED: F-box protein SKIP14-like isoform X1 [Fragaria vesca subsp. vesca] &gt;gi|764612861|ref|XP_011467729.1| PREDICTED: F-box protein SKIP14-like isoform X1 [Fragaria vesca subsp. vesca]; s…	F-box_dom; F-box domain; F-box-like; F-box-like_dom_sf; FvH4_6g52710.t1_v4.0.a2; FvH4_6g52710.t2_v4.0.a2; LRR_dom_sf; MITOCHONDRIAL ATP SYNTHASE COUPLING FACTOR B; protein binding; RNI-like;	protein binding	GO:0005515
TE_homo_98662	-5.10822	0.0189122	Fvb6:1719-1872	Fvb6	3677	14550	FvH4_6g00010	-	1806	Downstream TTS	0.945606	0.00289668	AT5G16270.1 | sister chromatid cohesion 1 protein 4 | Chr5:5316783-5322330 FORWARD LENGTH=1031 | 201606; PREDICTED: sister chromatid cohesion 1 protein 4 isoform X3 [Fragaria vesca subsp. vesca]; sp|Q8W1Y0|SSC14_ARATH Sister chromatid cohesion 1 protein 4 OS=Arabidopsis thaliana OX=3702 GN=SYN4 PE=2 SV=1; tr|A0A251P141|A0A251P141_PRUPE Uncharacterized protein OS=Prunus persica OX=3760 GN=PRUPE_6G…	cohesin complex; disorder_prediction; FvH4_6g00010.t1_v4.0.a2; Meiotic synapsis; protein binding; &quot;Winged helix&quot; DNA-binding domain; Rad21_Rec8; Rad21/Rec8_C_eu; Rad21/Rec8-like; Rad21_Rec8_N; SCC1 / RAD21 FAMILY MEMBER; ScpA-like_C; sister chromatid cohesion; SISTER CHROMATID COHESION 1 PROTEIN 4; WH_DNA-bd_sf	cohesin complex; protein binding; sister chromatid cohesion	GO:0005515; GO:0007062; GO:0008278
TE_homo_87502	-5.10674	0.0248644	Fvb5:13299288-13299722	Fvb5	13297755	13298469	FvH4_5g21930	-	819	Upstream TSS	NA	NA	AT4G17810.1 | C2H2 and C2HC zinc fingers superfamily protein | Chr4:9906918-9907532 FORWARD LENGTH=204 | 201606; PREDICTED: transcriptional regulator SUPERMAN [Fragaria vesca subsp. vesca]; sp|O80942|ZFP10_ARATH Zinc finger protein 10 OS=Arabidopsis thaliana OX=3702 GN=ZFP10 PE=2 SV=1; tr|A0A2P6P9Z4|A0A2P6P9Z4_ROSCH Putative transcription factor C2H2 family OS=Rosa chinensis OX=74649 GN=RchiOBHm_…	beta-beta-alpha zinc fingers; disorder_prediction; FAMILY NOT NAMED; FvH4_5g21930.t1_v4.0.a2; nucleic acid binding; ; zf-C2H2_6; ZINC_FINGER_C2H2_1; ZINC_FINGER_C2H2_2; Znf_C2H2_sf; Znf_C2H2_type	nucleic acid binding	GO:0003676
TE_homo_99501	-5.02523	1.6016e-16	Fvb6:2208894-2209233	Fvb6	2207468	2207864	FvH4_6g04060	+	1030	Downstream TTS	NA	NA	PREDICTED: TMV resistance protein N-like isoform X2 [Fragaria vesca subsp. vesca]; tr|A0A2P6RE29|A0A2P6RE29_ROSCH Uncharacterized protein OS=Rosa chinensis OX=74649 GN=RchiOBHm_Chr3g0481891 PE=4 SV=1	FvH4_6g04060.t1_v4.0.a2	NA	NA
TE_homo_20685	-5.01169	6.28734e-09	Fvb2:8485776-8486190	Fvb2	8487156	8491480	FvH4_2g09560	+	967	Upstream TSS	-0.865584	0.0369816	AT4G39150.3 | DNAJ heat shock N-terminal domain-containing protein | Chr4:18233651-18235740 REVERSE LENGTH=345 | 201606; PREDICTED: chaperone protein dnaJ 10-like [Fragaria vesca subsp. vesca] &gt;gi|764523384|ref|XP_011457713.1| PREDICTED: chaperone protein dnaJ 10-like [Fragaria vesca subsp. vesca]; sp|Q8GYX8|DNJ10_ARATH Chaperone protein dnaJ 10 OS=Arabidopsis thaliana OX=3702 GN=ATJ10 PE=2 SV…	Chaperone J-domain; DnaJ; DNAJ_1; DNAJ_2; DnaJ_domain; DnaJ_domain_CS; DnaJ-X; DnaJ_X; FAMILY NOT NAMED; FvH4_2g09560.t1_v4.0.a2; FvH4_2g09560.t2_v4.0.a2; FvH4_2g09560.t3_v4.0.a2; JDOMAIN; J_dom_sf;	NA	NA
TE_homo_20685	-5.01169	6.28734e-09	Fvb2:8485776-8486190	Fvb2	8480654	8485268	FvH4_2g09550	+	508	Downstream TTS	NA	NA	AT4G39150.3 | DNAJ heat shock N-terminal domain-containing protein | Chr4:18233651-18235740 REVERSE LENGTH=345 | 201606; PREDICTED: chaperone protein dnaJ 10-like isoform X1 [Fragaria vesca subsp. vesca] &gt;gi|764523370|ref|XP_011457710.1| PREDICTED: chaperone protein dnaJ 10-like isoform X1 [Fragaria vesca subsp. vesca]; sp|Q8GYX8|DNJ10_ARATH Chaperone protein dnaJ 10 OS=Arabidopsis thaliana OX…	Chaperone J-domain; DnaJ; DNAJ_1; DNAJ_2; DnaJ_domain; DnaJ_domain_CS; DnaJ-X; DnaJ_X; FAMILY NOT NAMED; FvH4_2g09550.t1_v4.0.a2; JDOMAIN; J_dom_sf;	NA	NA
TE_homo_128633	-4.71205	0.0277409	Fvb7:9993389-9993945	Fvb7	9989579	9990903	FvH4_7g10641	+	2486	Downstream TTS	NA	NA	PREDICTED: uncharacterized protein LOC101292758 [Fragaria vesca subsp. vesca]; tr|A0A2N9GLX8|A0A2N9GLX8_FAGSY Uncharacterized protein OS=Fagus sylvatica OX=28930 GN=FSB_LOCUS31328 PE=4 SV=1	FvH4_7g10641.t1_v4.0.a2; ; Transposase_21; UNCHARACTERIZED	NA	NA
TE_struc_2986	-4.69103	0.0434892	Fvb6:35436991-35437377	Fvb6	35437400	35443054	FvH4_6g46450	+	24	Upstream TSS	-0.167724	0.749519	AT5G15810.1 | tRNA (guanine(26)-N(2))-dimethyltransferase | Chr5:5158092-5161121 FORWARD LENGTH=593 | 201606; PREDICTED: probable tRNA (guanine(26)-N(2))-dimethyltransferase 1 [Fragaria vesca subsp. vesca]; sp|Q9LFU5|TRM1_ARATH Probable tRNA (guanine(26)-N(2))-dimethyltransferase 1 OS=Arabidopsis thaliana OX=3702 GN=At5g15810 PE=2 SV=3; tr|A0A2P6S3P2|A0A2P6S3P2_ROSCH tRNA (guanine(26)-N(2))-dimet…	AdoMet_MTases; Coil; disorder_prediction; FvH4_6g46450.t1_v4.0.a2; N 2 ,N 2 -DIMETHYLGUANOSINE TRNA METHYLTRANSFERASE; RNA binding; S-adenosyl-L-methionine-dependent methyltransferases; SAM-dependent_MTases; SAM_MT_TRM1; TRM; Trm1; TRNA (GUANINE(26)-N(2))-DIMETHYLTRANSFERASE 1-RELATED; tRNA (guanine-N2-)-methyltransferase activity; Trna methylation (yeast); tRNA_met_Trm1_C; tRNA processing	obsolete tRNA (guanine-N2-)-methyltransferase activity; RNA binding; tRNA processing	GO:0003723; GO:0004809; GO:0008033
TE_homo_73774	-4.66379	0.0245146	Fvb4:19550152-19550577	Fvb4	19546821	19547855	FvH4_4g15662	-	2297	Upstream TSS	-1.23666	0.335811	AT4G02550.5 | Myb/SANT-like DNA-binding domain protein | Chr4:1120622-1121629 REVERSE LENGTH=307 | 201606; PREDICTED: uncharacterized protein LOC105349374 [Fragaria vesca subsp. vesca]; tr|A0A2P6SB86|A0A2P6SB86_ROSCH Putative Myb/SANT-like domain-containing protein OS=Rosa chinensis OX=74649 GN=RchiOBHm_Chr1g0330381 PE=4 SV=1	disorder_prediction; FAMILY NOT NAMED; FvH4_4g15662.t1_v4.0.a2; Myb_DNA-bind_3; Myb/SANT-like_dom;	NA	NA
TE_homo_102311	-4.61075	0.016911	Fvb6:7721944-7722203	Fvb6	7724024	7724476	FvH4_6g12751	-	1822	Downstream TTS	0.614425	0.812999	tr|A0A2P6S2X8|A0A2P6S2X8_ROSCH Uncharacterized protein OS=Rosa chinensis OX=74649 GN=RchiOBHm_Chr2g0161781 PE=4 SV=1; uncharacterized protein LOC112185061 [Rosa chinensis] &gt;gi|1358178536|gb|PRQ53011.1| hypothetical protein RchiOBHm_Chr2g0161781 [Rosa chinensis]	FvH4_6g12751.t1_v4.0.a2	NA	NA
TE_homo_111496	-4.60649	0.018637	Fvb6:20290169-20290516	Fvb6	20281570	20287410	FvH4_6g26550	-	2759	Upstream TSS	3.34502	0.000802059	AT1G03780.2 | targeting protein for XKLP2 | Chr1:947785-951696 REVERSE LENGTH=758 | 201606; PREDICTED: protein TPX2 isoform X1 [Fragaria vesca subsp. vesca]; sp|F4I2H7|TPX2_ARATH Protein TPX2 OS=Arabidopsis thaliana OX=3702 GN=TPX2 PE=1 SV=1; tr|A0A2P6RU48|A0A2P6RU48_ROSCH Putative TPX2 central domain-containing protein OS=Rosa chinensis OX=74649 GN=RchiOBHm_Chr2g0127601 PE=4 SV=1	activation of protein kinase activity; AURKA Activation by TPX2; Coil; disorder_prediction; FvH4_6g26550.t1_v4.0.a2; microtubule; regulation of mitotic spindle organization; Regulation of TP53 Activity through Phosphorylation; ; spindle; TARGETING PROTEIN FOR XKLP2; TPX2; TPX2_C; TPX2_central_dom; TPX2_fam; TPX2_importin	activation of protein kinase activity; microtubule; regulation of mitotic spindle organization; spindle	GO:0005819; GO:0005874; GO:0032147; GO:0060236
TE_homo_111496	-4.60649	0.018637	Fvb6:20290169-20290516	Fvb6	20291322	20292121	FvH4_6g26560	+	807	Upstream TSS	NA	NA	AT5G44265.1 | Bifunctional inhibitor/lipid-transfer protein/seed storage 2S albumin superfamily protein | Chr5:17832779-17833316 REVERSE LENGTH=126 | 201606; PREDICTED: non-specific lipid-transfer protein 13-like [Fragaria vesca subsp. vesca]; sp|A8MQA2|NLTPD_ARATH Non-specific lipid-transfer protein 13 OS=Arabidopsis thaliana OX=3702 GN=LTP13 PE=2 SV=1; tr|A0A2P6RU37|A0A2P6RU37_ROSCH Putative pl…	Bifunc_inhib/LTP/seed_store; Bifunctional inhibitor/lipid-transfer protein/seed storage 2S albumin; Bifun_inhib/LTP/seed_sf; FAMILY NOT NAMED; FvH4_6g26560.t1_v4.0.a2; lipid binding; lipid transport; LIPIDTRNSFER; NON-SPECIFIC LIPID-TRANSFER PROTEIN 13-RELATED; Plant_LTP; PLANT_LTP; Tryp_alpha_amyl	lipid binding; lipid transport	GO:0006869; GO:0008289
TE_homo_111496	-4.60649	0.018637	Fvb6:20290169-20290516	Fvb6	20292835	20293264	FvH4_6g26570	-	2320	Downstream TTS	NA	NA	AT1G70780.1 | hypothetical protein | Chr1:26695462-26695975 REVERSE LENGTH=140 | 201606; PREDICTED: uncharacterized protein LOC101292530 [Fragaria vesca subsp. vesca]; tr|A0A2P6RU38|A0A2P6RU38_ROSCH Uncharacterized protein OS=Rosa chinensis OX=74649 GN=RchiOBHm_Chr2g0127581 PE=4 SV=1	At4g22758-like; FAMILY NOT NAMED; FvH4_6g26570.t1_v4.0.a2;	NA	NA
TE_homo_58262	-4.59382	1.33544e-17	Fvb4:474662-474845	Fvb4	475826	478208	FvH4_4g00530	+	982	Upstream TSS	NA	NA	AT3G22980.3 | Ribosomal protein S5/Elongation factor G/III/V family protein | Chr3:8160269-8163316 REVERSE LENGTH=1015 | 201606; putative protein-synthesizing GTPase [Rosa chinensis]; sp|Q7Z2Z2|EFL1_HUMAN Elongation factor-like GTPase 1 OS=Homo sapiens OX=9606 GN=EFL1 PE=1 SV=2; tr|A0A2P6PRW3|A0A2P6PRW3_ROSCH Uncharacterized protein OS=Rosa chinensis OX=74649 GN=RchiOBHm_Chr6g0274771 PE=4 SV=1	disorder_prediction; FAMILY NOT NAMED; FvH4_4g00530.t1_v4.0.a2;	NA	NA
TE_homo_58262	-4.59382	1.33544e-17	Fvb4:474662-474845	Fvb4	466457	474236	FvH4_4g00520	+	426	Downstream TTS	-0.747262	0.0713189	AT2G32700.6 | LEUNIG-like protein | Chr2:13867235-13871844 FORWARD LENGTH=785 | 201606; PREDICTED: transcriptional corepressor LEUNIG [Fragaria vesca subsp. vesca] &gt;gi|764570217|ref|XP_011462525.1| PREDICTED: transcriptional corepressor LEUNIG [Fragaria vesca subsp. vesca]; sp|O48847|LUH_ARATH Transcriptional corepressor LEUNIG_HOMOLOG OS=Arabidopsis thaliana OX=3702 GN=LUH PE=1 SV=1; tr|A0A2P…	Coil; disorder_prediction; FAMILY NOT NAMED; FvH4_4g00520.t1_v4.0.a2; G-protein_beta_WD-40_rep; GPROTEINBRPT; LisH; protein binding; TRANSCRIPTIONAL COREPRESSOR LEUNIG_HOMOLOG; WD40; WD40_repeat; WD40_repeat_CS; WD40_repeat_dom; WD40_repeat_dom_sf; WD40 repeat-like; WD40/YVTN_repeat-like_dom_sf; WD_REPEATS_1; WD_REPEATS_2; WD_REPEATS_REGION	protein binding	GO:0005515
TE_homo_119216	-4.59273	0.00667104	Fvb6:31778974-31779920	Fvb6	31774756	31776010	FvH4_6g40272	-	2964	Upstream TSS	NA	NA	AT4G12560.3 | F-box and associated interaction domains-containing protein | Chr4:7441815-7443157 FORWARD LENGTH=413 | 201606; PREDICTED: F-box/kelch-repeat protein At3g06240-like [Fragaria vesca subsp. vesca]; sp|Q9SU30|CPR1_ARATH F-box protein CPR1 OS=Arabidopsis thaliana OX=3702 GN=CPR1 PE=1 SV=2; tr|A0A251Q2J2|A0A251Q2J2_PRUPE Uncharacterized protein OS=Prunus persica OX=3760 GN=PRUPE_3G191300…	FAMILY NOT NAMED; F-box-assoc_interact_dom; FvH4_6g40272.t1_v4.0.a2; Galactose oxidase, central domain; Gal_Oxase/kelch_b-propeller; ; TIGR01640	NA	NA
TE_homo_70195	-4.57266	0.0165808	Fvb4:14491083-14491245	Fvb4	14486622	14488534	FvH4_4g10782	+	2549	Downstream TTS	NA	NA	AT2G34320.1 | Polynucleotidyl transferase%2C ribonuclease H-like superfamily protein | Chr2:14484959-14485837 FORWARD LENGTH=292 | 201606; tr|A0A2P6QCF0|A0A2P6QCF0_ROSCH Putative ribonuclease H-like domain-containing protein OS=Rosa chinensis OX=74649 GN=RchiOBHm_Chr5g0040041 PE=4 SV=1; uncharacterized protein LOC112177537 [Rosa chinensis]	FAMILY NOT NAMED; FvH4_4g10782.t1_v4.0.a2; nucleic acid binding; POLYNUCLEOTIDYL TRANSFERASE, RIBONUCLEASE H-LIKE SUPERFAMILY PROTEIN; Ribonuclease H-like; RNA-DNA hybrid ribonuclease activity; RNaseH_domain; RNase_H_like; RNaseH-like_sf; RNaseH_sf; RVT_3	nucleic acid binding; RNA-DNA hybrid ribonuclease activity	GO:0003676; GO:0004523
TE_struc_1625	-4.55341	0.00714699	Fvb4:14637136-14637530	Fvb4	14638712	14656957	FvH4_4g10960	+	1183	Upstream TSS	0.0460676	0.899014	AT2G43400.1 | electron-transfer flavoprotein:ubiquinone oxidoreductase | Chr2:18021304-18025041 FORWARD LENGTH=633 | 201606; PREDICTED: electron transfer flavoprotein-ubiquinone oxidoreductase, mitochondrial isoform X3 [Fragaria vesca subsp. vesca]; sp|O22854|ETFQO_ARATH Electron transfer flavoprotein-ubiquinone oxidoreductase, mitochondrial OS=Arabidopsis thaliana OX=3702 GN=ETFQO PE=2 SV=1; tr|…	4Fe-4S ferredoxins; ELECTRON TRANSFER FLAVOPROTEIN-UBIQUINONE OXIDOREDUCTASE; ELECTRON TRANSFER FLAVOPROTEIN-UBIQUINONE OXIDOREDUCTASE, MITOCHONDRIAL; electron-transferring-flavoprotein dehydrogenase activity; electron transport chain; ETF-QO; ETF_QO; FAD-linked reductases, C-terminal domain; FAD/NAD-bd_sf; FAD/NAD(P)-binding domain; FvH4_4g10960.t1_v4.0.a2; NAD_binding_8; Respiratory electron tr…	electron-transferring-flavoprotein dehydrogenase activity; electron transport chain	GO:0004174; GO:0022900
TE_homo_5452	-4.46747	0.000201035	Fvb1:12219150-12219577	Fvb1	12221740	12224996	FvH4_1g20050	-	2164	Downstream TTS	-0.500223	0.0427909	AT2G22475.1 | GRAM domain family protein | Chr2:9541523-9544778 FORWARD LENGTH=299 | 201606; PREDICTED: GLABRA2 expression modulator-like [Fragaria vesca subsp. vesca]; sp|Q8S8F8|GEM_ARATH GLABRA2 expression modulator OS=Arabidopsis thaliana OX=3702 GN=GEM PE=1 SV=1; tr|A0A2P6RQ62|A0A2P6RQ62_ROSCH Putative GRAM domain-containing protein OS=Rosa chinensis OX=74649 GN=RchiOBHm_Chr2g0112041 PE=4 SV=1	disorder_prediction; FAMILY NOT NAMED; FvH4_1g20050.t1_v4.0.a2; GEM-like; GEM-LIKE PROTEIN 3-RELATED; GRAM; PH-GRAM_GEM; PH-like_dom_sf	NA	NA
TE_homo_26493	-4.44252	0.0137656	Fvb2:16678307-16678606	Fvb2	16680723	16681363	FvH4_2g19740	+	2118	Upstream TSS	NA	NA	AT4G29037.1 | plant self-incompatibility protein S1 family protein | Chr4:14311498-14312128 FORWARD LENGTH=166 | 201606; sp|Q40975|S1_PAPRH Self-incompatibility protein S1 OS=Papaver rhoeas OX=33128 GN=S1 PE=1 SV=1; tr|A0A061DMI7|A0A061DMI7_THECC Uncharacterized protein OS=Theobroma cacao OX=3641 GN=TCM_003121 PE=4 SV=1; Uncharacterized protein TCM_003121 [Theobroma cacao]	FAMILY NOT NAMED; FvH4_2g19740.t1_v4.0.a2; Self-incomp_S1	NA	NA
TE_homo_23016	-4.43102	0.000196926	Fvb2:11645206-11645622	Fvb2	11642906	11643296	FvH4_2g13341	+	1910	Downstream TTS	NA	NA	NA	FvH4_2g13341.t1_v4.0.a2	NA	NA
TE_homo_70925	-4.31207	0.0283724	Fvb4:15527004-15527252	Fvb4	15528633	15529488	FvH4_4g11800	+	1382	Upstream TSS	NA	NA	NA	FvH4_4g11800.t1_v4.0.a2	NA	NA
TE_homo_70925	-4.31207	0.0283724	Fvb4:15527004-15527252	Fvb4	15527504	15528400	FvH4_4g11790	-	253	Downstream TTS	NA	NA	AT1G78360.1 | glutathione S-transferase TAU 21 | Chr1:29482070-29482966 REVERSE LENGTH=220 | 201606; probable glutathione S-transferase parA [Prunus persica]; sp|P25317|GSTXA_TOBAC Probable glutathione S-transferase parA OS=Nicotiana tabacum OX=4097 GN=PARA PE=2 SV=1; tr|M5XNN8|M5XNN8_PRUPE Uncharacterized protein OS=Prunus persica OX=3760 GN=PRUPE_ppa022301mg PE=3 SV=1	FvH4_4g11790.t1_v4.0.a2; GLUTATHIONE S-TRANSFERASE, GST, SUPERFAMILY, GST DOMAIN CONTAINING; Glutathione-S-Trfase_C-like; Glutathione-S-Trfase_C_sf; Glutathione_S-Trfase_N; GST_C_2; GST_C_Tau; GST_CTER; GST C-terminal domain-like; GST_N; GST_N_Tau; GST_NTER; protein binding; ; Thioredoxin-like; Thioredoxin-like_sf	protein binding	GO:0005515
TE_homo_23271	-4.30416	0.0145366	Fvb2:12072330-12072651	Fvb2	12075147	12079950	FvH4_2g13841	+	2497	Upstream TSS	NA	NA	NA	disorder_prediction; FvH4_2g13841.t1_v4.0.a2	NA	NA
TE_homo_23271	-4.30416	0.0145366	Fvb2:12072330-12072651	Fvb2	12068189	12070769	FvH4_2g13840	+	1561	Downstream TTS	6.87133	7.02555e-18	AT1G76890.2 | Duplicated homeodomain-like superfamily protein | Chr1:28873211-28875203 REVERSE LENGTH=575 | 201606; PREDICTED: trihelix transcription factor GT-2-like [Fragaria vesca subsp. vesca]; sp|Q39117|TGT2_ARATH Trihelix transcription factor GT-2 OS=Arabidopsis thaliana OX=3702 GN=GT-2 PE=2 SV=1; tr|A0A2H4NFW4|A0A2H4NFW4_FRAAN Trihelix transcription factor GT-2A OS=Fragaria ananassa OX=374…	disorder_prediction; FAMILY NOT NAMED; FvH4_2g13840.t1_v4.0.a2; GT1; Myb_DNA-bind_4; MYB_LIKE; Myb-like_dom; TRIHELIX TRANSCRIPTION FACTOR GT-2	NA	NA
TE_homo_122151	-4.29557	0.00811389	Fvb6:38737927-38738194	Fvb6	38732129	38737168	FvH4_6g52720	-	759	Upstream TSS	-0.313943	0.676019	AT5G40760.2 | glucose-6-phosphate dehydrogenase 6 | Chr5:16311284-16314556 FORWARD LENGTH=515 | 201606; PREDICTED: glucose-6-phosphate 1-dehydrogenase, cytoplasmic isoform 2 [Fragaria vesca subsp. vesca] &gt;gi|764612847|ref|XP_011467727.1| PREDICTED: glucose-6-phosphate 1-dehydrogenase, cytoplasmic isoform 2 [Fragaria vesca subsp. vesca]; sp|Q9FJI5|G6PD6_ARATH Glucose-6-phosphate 1-dehydrogenase…	Entner-Doudoroff pathway I; FvH4_6g52720.t1_v4.0.a2; FvH4_6g52720.t2_v4.0.a2; G6PD; G6PD_C; G6P_DEHYDROGENASE; G6P_DH; G6P_DH_AS; G6P_DH_C; G6PDHDRGNASE; G6P_DH_NAD-bd; G6PD_N; GLUCOSE-6-PHOSPHATE 1-DEHYDROGENASE, CYTOPLASMIC ISOFORM 1; GLUCOSE-6-PHOSPHATE 1-DEHYDROGENASE G6PD; glucose-6-phosphate dehydrogenase activity; glucose metabolic process; Glutathione metabolism; Glyceraldehyde-3-phosphat…	glucose-6-phosphate dehydrogenase activity; glucose metabolic process; NADP binding; obsolete oxidation-reduction process; oxidoreductase activity, acting on CH-OH group of donors	GO:0004345; GO:0006006; GO:0016614; GO:0050661; GO:0055114
TE_homo_122151	-4.29557	0.00811389	Fvb6:38737927-38738194	Fvb6	38739487	38740274	FvH4_6g52721	-	1294	Downstream TTS	NA	NA	PREDICTED: zinc finger BED domain-containing protein RICESLEEPER 1-like [Fragaria vesca subsp. vesca]; tr|A0A2P6RA62|A0A2P6RA62_ROSCH Putative HAT dimerization domain, ribonuclease H-like domain, hAT-like transposase, RNase-H OS=Rosa chinensis OX=74649 GN=RchiOBHm_Chr3g0467291 PE=4 SV=1	BED FINGER-RELATED; DNA binding; DUF4413; FvH4_6g52721.t1_v4.0.a2; hAT-like_transposase_RNase-H; Ribonuclease H-like; RNaseH-like_sf	DNA binding	GO:0003677
TE_homo_82982	-4.2871	0.0163137	Fvb5:4041181-4041503	Fvb5	4038541	4039554	FvH4_5g06863	-	1627	Upstream TSS	NA	NA	AT3G05850.1 | MuDR family transposase | Chr3:1743537-1745943 REVERSE LENGTH=777 | 201606; PREDICTED: uncharacterized protein LOC105351805 [Fragaria vesca subsp. vesca]; tr|A0A2P6QD74|A0A2P6QD74_ROSCH Putative PB1 domain, transposase, MuDR, plant, Zinc finger, SWIM-type, MULE transposase OS=Rosa chinensis OX=74649 GN=RchiOBHm_Chr5g0042901 PE=4 SV=1	CAD &amp; PB1 domains; FAMILY NOT NAMED; FvH4_5g06863.t1_v4.0.a2; PB1; PB1_dom; protein binding;	protein binding	GO:0005515
TE_homo_121050	-4.28526	0.00117035	Fvb6:35684258-35684623	Fvb6	35675703	35681417	FvH4_6g46910	-	2841	Upstream TSS	1.00024	0.129408	AT3G29390.1 | RS2-interacting KH protein | Chr3:11289675-11294524 FORWARD LENGTH=578 | 201606; PREDICTED: protein RIK [Fragaria vesca subsp. vesca]; sp|Q9LIA4|RIK_ARATH Protein RIK OS=Arabidopsis thaliana OX=3702 GN=RIK PE=1 SV=2; tr|A0A2P6S3X8|A0A2P6S3X8_ROSCH Putative KH domain containing protein OS=Rosa chinensis OX=74649 GN=RchiOBHm_Chr2g0165881 PE=4 SV=1	BLOM7; disorder_prediction; Eukaryotic type KH-domain (KH-domain type I); FvH4_6g46910.t1_v4.0.a2; KH_dom_type_1_sf; KH HOMOLOGY DOMAIN-CONTAINING PROTEIN 4; nucleus; RIK/BLOM7; RNA binding	nucleus; RNA binding	GO:0003723; GO:0005634
TE_homo_121050	-4.28526	0.00117035	Fvb6:35684258-35684623	Fvb6	35681609	35682125	FvH4_6g46911	-	2133	Upstream TSS	NA	NA	AT1G13900.1 | Purple acid phosphatases superfamily protein | Chr1:4753494-4755554 REVERSE LENGTH=656 | 201606; PREDICTED: probable inactive purple acid phosphatase 2 [Fragaria vesca subsp. vesca]; sp|Q9LMG7|PPA2_ARATH Probable inactive purple acid phosphatase 2 OS=Arabidopsis thaliana OX=3702 GN=PAP2 PE=2 SV=1; tr|A0A2P6R2M8|A0A2P6R2M8_ROSCH Purple acid phosphatase OS=Rosa chinensis OX=74649 GN=R…	FAMILY NOT NAMED; FvH4_6g46911.t1_v4.0.a2; INACTIVE PURPLE ACID PHOSPHATASE 9-RELATED	NA	NA
TE_homo_98076	-4.19725	0.00464599	Fvb5:28527137-28527407	Fvb5	28523959	28525889	FvH4_5g38590	-	1248	Upstream TSS	-1.94304	0.00117077	tr|A0A2P6PHZ4|A0A2P6PHZ4_ROSCH GrpE protein homolog OS=Rosa chinensis OX=74649 GN=RchiOBHm_Chr7g0240521 PE=3 SV=1; uncharacterized protein LOC112175333 [Rosa chinensis] &gt;gi|1358147076|gb|PRQ21556.1| putative GrpE nucleotide exchange factor [Rosa chinensis]	FvH4_5g38590.t1_v4.0.a2	NA	NA
TE_homo_134413	-4.13953	0.0162018	Fvb7:23027408-23027555	Fvb7	23023301	23026274	FvH4_7g31930	-	1134	Upstream TSS	-3.93364	0.00105909	AT5G53130.1 | cyclic nucleotide gated channel 1 | Chr5:21537830-21540490 REVERSE LENGTH=716 | 201606; PREDICTED: cyclic nucleotide-gated ion channel 1-like [Fragaria vesca subsp. vesca]; sp|O65717|CNGC1_ARATH Cyclic nucleotide-gated ion channel 1 OS=Arabidopsis thaliana OX=3702 GN=CNGC1 PE=1 SV=1; tr|A0A2P6SP57|A0A2P6SP57_ROSCH Putative potassium channel, voltage-dependent, EAG/ELK/ERG OS=Rosa ch…	cAMP-binding domain-like; CAP_ED; cNMP-bd_dom; cNMP-bd-like; cNMP_binding; CNMP_BINDING_3; CYCLIC NUCLEOTIDE-GATED ION CHANNEL 1; FAMILY NOT NAMED; FvH4_7g31930.t1_v4.0.a2; ion channel activity; Ion_trans; Ion_trans_dom; ion transport; membrane; RmlC-like_jellyroll; transmembrane transport; Voltage-gated potassium channels	membrane; monoatomic ion channel activity; monoatomic ion transport; transmembrane transport	GO:0005216; GO:0006811; GO:0016020; GO:0055085
TE_homo_134413	-4.13953	0.0162018	Fvb7:23027408-23027555	Fvb7	23028084	23028567	FvH4_7g31931	+	530	Upstream TSS	NA	NA	NA	disorder_prediction; FvH4_7g31931.t1_v4.0.a2	NA	NA
TE_homo_134413	-4.13953	0.0162018	Fvb7:23027408-23027555	Fvb7	23029593	23031099	FvH4_7g31932	-	2039	Downstream TTS	NA	NA	PREDICTED: uncharacterized protein LOC103446245 [Malus domestica]; tr|A0A314Y0C1|A0A314Y0C1_PRUYE Uncharacterized protein OS=Prunus yedoensis var. nudiflora OX=2094558 GN=Pyn_25985 PE=4 SV=1	disorder_prediction; FAMILY NOT NAMED; FvH4_7g31932.t1_v4.0.a2;	NA	NA
TE_homo_116160	-4.11629	0.0139872	Fvb6:26695234-26695535	Fvb6	26689622	26693013	FvH4_6g33670	-	2221	Upstream TSS	-0.0924437	0.882015	AT1G17640.3 | RNA-binding (RRM/RBD/RNP motifs) family protein | Chr1:6067394-6069098 REVERSE LENGTH=369 | 201606; PREDICTED: heterogeneous nuclear ribonucleoprotein 1 [Fragaria vesca subsp. vesca]; sp|Q8W034|RNP1_ARATH Heterogeneous nuclear ribonucleoprotein 1 OS=Arabidopsis thaliana OX=3702 GN=RNP1 PE=1 SV=1; tr|A0A2P6RY63|A0A2P6RY63_ROSCH Putative nucleotide-binding alpha-beta plait domain-cont…	BOULE/DAZ; BOULE-RELATED; disorder_prediction; FvH4_6g33670.t1_v4.0.a2; GENE 17190-RELATED; germ cell development; mRNA binding; nucleic acid binding; Nucleotide-bd_a/b_plait_sf; RBD_domain_sf; RNA-binding domain, RBD; RRM; RRM_1; RRM_dom	germ cell development; mRNA binding; nucleic acid binding	GO:0003676; GO:0003729; GO:0007281
TE_homo_99497	-4.1112	0.000776762	Fvb6:2205606-2205930	Fvb6	2202300	2205361	FvH4_6g04050	+	245	Downstream TTS	0.421088	0.661595	AT1G11290.1 | Pentatricopeptide repeat (PPR) superfamily protein | Chr1:3791454-3793883 REVERSE LENGTH=809 | 201606; PREDICTED: putative pentatricopeptide repeat-containing protein At5g52630 [Fragaria vesca subsp. vesca]; sp|Q3E6Q1|PPR32_ARATH Pentatricopeptide repeat-containing protein At1g11290, chloroplastic OS=Arabidopsis thaliana OX=3702 GN=PCMP-H40 PE=2 SV=1; tr|A0A2P6R6B4|A0A2P6R6B4_ROSCH …	DYW_deaminase; DYW_dom; FAMILY NOT NAMED; FvH4_6g04050.t1_v4.0.a2; Pentatricopeptide_repeat; PPR; PPR_2; protein binding; TIGR00756; TPR-like_helical_dom_sf; zinc ion binding	protein binding; zinc ion binding	GO:0005515; GO:0008270
TE_homo_87596	-4.08322	0.000273294	Fvb5:13432932-13433352	Fvb5	13431127	13431706	FvH4_5g22090	-	1226	Upstream TSS	-1.63897	0.481909	AT5G46770.1 | hypothetical protein | Chr5:18977494-18977895 FORWARD LENGTH=133 | 201606; PREDICTED: uncharacterized protein LOC105351901 [Fragaria vesca subsp. vesca]; tr|A0A2P6PA08|A0A2P6PA08_ROSCH Uncharacterized protein OS=Rosa chinensis OX=74649 GN=RchiOBHm_Chr7g0209741 PE=4 SV=1	FAMILY NOT NAMED; FvH4_5g22090.t1_v4.0.a2	NA	NA
TE_homo_27314	-4.07027	4.46261e-05	Fvb2:18112303-18112478	Fvb2	18115173	18116229	FvH4_2g21940	+	2696	Upstream TSS	NA	NA	AT3G58190.1 | lateral organ boundaries-domain 29 | Chr3:21548716-21549488 REVERSE LENGTH=218 | 201606; PREDICTED: LOB domain-containing protein 29-like [Fragaria vesca subsp. vesca]; sp|Q9M2J7|LBD29_ARATH LOB domain-containing protein 29 OS=Arabidopsis thaliana OX=3702 GN=LBD29 PE=2 SV=1; tr|A0A2P6PVF9|A0A2P6PVF9_ROSCH Putative transcription factor AS2-LOB family OS=Rosa chinensis OX=74649 GN=Rch…	Coil; FvH4_2g21940.t1_v4.0.a2; LOB; LOB DOMAIN CONTAINING PROTEIN;	NA	NA
TE_homo_85008	-4.06358	0.0176336	Fvb5:8848215-8848325	Fvb5	8849174	8852527	FvH4_5g15660	+	850	Upstream TSS	NA	NA	AT5G28470.2 | Major facilitator superfamily protein | Chr5:10429813-10432357 FORWARD LENGTH=561 | 201606; protein NRT1/ PTR FAMILY 2.8 [Rosa chinensis] &gt;gi|1358141613|gb|PRQ16093.1| putative proton-dependent oligopeptide transporter family, major facilitator superfamily [Rosa chinensis]; sp|Q3E8X3|PTR52_ARATH Protein NRT1/ PTR FAMILY 2.8 OS=Arabidopsis thaliana OX=3702 GN=NPF2.8 PE=2 SV=2; tr|…	disorder_prediction; FvH4_5g15660.t1_v4.0.a2; FvH4_5g15660.t2_v4.0.a2; membrane; MFS general substrate transporter; MFS_trans_sf; OLIGOPEPTIDE TRANSPORTER-RELATED; POT_fam; PROTEIN NRT1/ PTR FAMILY 2.8; Proton/oligopeptide cotransporters; PTR2; transmembrane transport; transmembrane transporter activity	membrane; transmembrane transport; transmembrane transporter activity	GO:0016020; GO:0022857; GO:0055085
TE_homo_101225	-4.04449	0.037744	Fvb6:5670887-5671119	Fvb6	5665689	5669009	FvH4_6g09510	-	1878	Upstream TSS	2.43459	0.115945	AT2G38600.2 | HAD superfamily%2C subfamily IIIB acid phosphatase | Chr2:16145907-16146857 FORWARD LENGTH=251 | 201606; PREDICTED: acid phosphatase 1 [Fragaria vesca subsp. vesca] &gt;gi|764599557|ref|XP_011466401.1| PREDICTED: acid phosphatase 1 [Fragaria vesca subsp. vesca] &gt;gi|764599561|ref|XP_011466402.1| PREDICTED: acid phosphatase 1 [Fragaria vesca subsp. vesca]; sp|P27061|PPA1_SOLLC Acid…	acid phosphatase activity; Acid_phosphatase_pln; Acid_phosphat_B; Acid_phosphat_B-like; APS1/VSP; FAMILY NOT NAMED; FvH4_6g09510.t1_v4.0.a2; FvH4_6g09510.t2_v4.0.a2; FvH4_6g09510.t3_v4.0.a2; FvH4_6g09510.t4_v4.0.a2; HAD-like; HAD-like_sf; HAD_sf; HAD SUPERFAMILY, SUBFAMILY IIIB ACID PHOSPHATASE; HAD_VSP; TIGR01675; VSP	acid phosphatase activity	GO:0003993
TE_homo_112695	-4.0099	9.3259e-06	Fvb6:21799725-21800023	Fvb6	21796424	21798295	FvH4_6g28320	-	1430	Upstream TSS	NA	NA	leucine-rich repeat extensin-like protein 2 [Rosa chinensis] &gt;gi|1358175889|gb|PRQ50364.1| hypothetical protein RchiOBHm_Chr2g0132371 [Rosa chinensis]; tr|A0A2P6RVB5|A0A2P6RVB5_ROSCH Uncharacterized protein OS=Rosa chinensis OX=74649 GN=RchiOBHm_Chr2g0132371 PE=4 SV=1	disorder_prediction; FvH4_6g28320.t1_v4.0.a2	NA	NA
TE_homo_128606	-4.006	0.0272721	Fvb7:9971727-9972018	Fvb7	9968170	9971225	FvH4_7g10631	-	502	Upstream TSS	NA	NA	NA	disorder_prediction; FvH4_7g10631.t1_v4.0.a2	NA	NA
TE_homo_59669	-3.98532	8.53403e-09	Fvb4:2454874-2455053	Fvb4	2446593	2453920	FvH4_4g02690	-	954	Upstream TSS	3.44447	5.56115e-13	AT5G43630.4 | zinc knuckle (CCHC-type) family protein | Chr5:17527261-17530207 FORWARD LENGTH=831 | 201606; PREDICTED: uncharacterized protein LOC101293145 isoform X2 [Fragaria vesca subsp. vesca]; tr|A0A2P6QQ99|A0A2P6QQ99_ROSCH Putative transcription factor interactor and regulator CCHC(Zn) family OS=Rosa chinensis OX=74649 GN=RchiOBHm_Chr4g0390511 PE=4 SV=1	disorder_prediction; DNA binding; E3 ubiquitin ligases ubiquitinate target proteins; Formation of RNA Pol II elongation complex; FvH4_4g02690.t1_v4.0.a2; FvH4_4g02690.t3_v4.0.a2; Plus-3; PLUS3; Plus-3_dom; Plus3-like; Plus3-like_sf; RNA Polymerase II Pre-transcription Events; RNA Polymerase II Transcription Elongation; UNCHARACTERIZED; ZINC KNUCKLE (CCHC-TYPE) FAMILY PROTEIN	DNA binding	GO:0003677
TE_homo_59669	-3.98532	8.53403e-09	Fvb4:2454874-2455053	Fvb4	2457778	2458595	FvH4_4g02691	-	2726	Downstream TTS	-0.851082	0.818061	NA	FvH4_4g02691.t1_v4.0.a2	NA	NA
TE_homo_108718	-3.96008	0.00231195	Fvb6:16898858-16899005	Fvb6	16894613	16897248	FvH4_6g23072	-	1610	Upstream TSS	NA	NA	tr|A0A2P6RCY8|A0A2P6RCY8_ROSCH Uncharacterized protein OS=Rosa chinensis OX=74649 GN=RchiOBHm_Chr3g0477491 PE=4 SV=1; uncharacterized protein LOC112188649 [Rosa chinensis]	Coil; disorder_prediction; FAMILY NOT NAMED; FvH4_6g23072.t1_v4.0.a2; Probable_transposase_24; ; Transposase_24	NA	NA
TE_homo_108718	-3.96008	0.00231195	Fvb6:16898858-16899005	Fvb6	16899368	16902871	FvH4_6g23073	-	364	Downstream TTS	NA	NA	tr|A0A2P6QTU1|A0A2P6QTU1_ROSCH Uncharacterized protein OS=Rosa chinensis OX=74649 GN=RchiOBHm_Chr4g0403821 PE=4 SV=1; uncharacterized protein LOC112186161 [Rosa chinensis]	Coil; disorder_prediction; DUF4216; DUF4218; FvH4_6g23073.t1_v4.0.a2; ; UNCHARACTERIZED	NA	NA
TE_homo_21252	-3.87759	0.00718219	Fvb2:9318508-9318727	Fvb2	9318842	9322851	FvH4_2g10510	+	116	Upstream TSS	-0.496354	0.111865	AT3G21060.1 | Transducin/WD40 repeat-like superfamily protein | Chr3:7377822-7379942 FORWARD LENGTH=547 | 201606; PREDICTED: protein RBL [Fragaria vesca subsp. vesca] &gt;gi|764530567|ref|XP_011458299.1| PREDICTED: protein RBL [Fragaria vesca subsp. vesca]; sp|Q5E915|RBBP_ARATH Protein RBL OS=Arabidopsis thaliana OX=3702 GN=RBL PE=1 SV=1; tr|A0A2P6PQ30|A0A2P6PQ30_ROSCH Putative transcription fact…	Activation of anterior HOX genes in hindbrain development during early embryogenesis; Deactivation of the beta-catenin transactivating complex; disorder_prediction; FAMILY NOT NAMED; Formation of the beta-catenin:TCF transactivating complex; FvH4_2g10510.t1_v4.0.a2; FvH4_2g10510.t2_v4.0.a2; FvH4_2g10510.t3_v4.0.a2; FvH4_2g10510.t4_v4.0.a2; Neddylation; PKMTs methylate histone lysines; protein bin…	protein binding; Set1C/COMPASS complex	GO:0005515; GO:0048188
TE_homo_21252	-3.87759	0.00718219	Fvb2:9318508-9318727	Fvb2	9313164	9317496	FvH4_2g10501	+	1012	Downstream TTS	NA	NA	NA	disorder_prediction; FvH4_2g10501.t1_v4.0.a2	NA	NA
TE_homo_29701	-3.876	0.0077592	Fvb2:23455232-23455558	Fvb2	23453299	23453825	FvH4_2g30320	-	1407	Upstream TSS	NA	NA	AT1G66370.1 | myb domain protein 113 | Chr1:24753634-24754604 FORWARD LENGTH=246 | 201606; putative transcription factor MYB-HB-like family [Rosa chinensis]; sp|Q9FNV9|MY113_ARATH Transcription factor MYB113 OS=Arabidopsis thaliana OX=3702 GN=MYB113 PE=1 SV=1; tr|A0A2P6QWN1|A0A2P6QWN1_ROSCH Putative transcription factor MYB-HB-like family OS=Rosa chinensis OX=74649 GN=RchiOBHm_Chr4g0415831 PE=4 S…	DNA binding; FvH4_2g30320.t1_v4.0.a2; Homeobox-like_sf; Homeodomain-like; Myb_DNA-bind_6; MYB-LIKE DNA-BINDING PROTEIN MYB; Myb-like_TF; TRANSCRIPTION FACTOR MYB113-RELATED	DNA binding	GO:0003677
TE_homo_34968	-3.75166	0.00833681	Fvb3:7147058-7147477	Fvb3	7143547	7146568	FvH4_3g12050	-	490	Upstream TSS	-1.11598	1.86877e-05	AT1G04760.2 | vesicle-associated membrane protein 726 | Chr1:1334760-1336070 FORWARD LENGTH=220 | 201606; PREDICTED: putative vesicle-associated membrane protein 726 [Fragaria vesca subsp. vesca]; sp|Q9MAS5|VA726_ARATH Putative vesicle-associated membrane protein 726 OS=Arabidopsis thaliana OX=3702 GN=VAMP726 PE=2 SV=2; tr|A0A2P6Q744|A0A2P6Q744_ROSCH Putative Longin-like domain-containing protein…	COPII-mediated vesicle transport; FvH4_3g12050.t1_v4.0.a2; integral component of membrane; Longin; LONGIN; Longin_dom; Longin-like_dom_sf; R-SNARE; ; SNARE fusion complex; SNARE-like; SNARE PROTEINS; Synaptobrevin; SYNAPTOBREVIN; SYNAPTOBREVN; vesicle-mediated transport; V_SNARE	integral to membrane; vesicle-mediated transport	GO:0016021; GO:0016192
TE_homo_34968	-3.75166	0.00833681	Fvb3:7147058-7147477	Fvb3	7148725	7152513	FvH4_3g12060	-	1249	Downstream TTS	0.222543	0.453862	AT5G44785.2 | organellar single-stranded DNA binding protein 3 | Chr5:18070877-18073010 REVERSE LENGTH=442 | 201606; PREDICTED: protein OSB3, chloroplastic/mitochondrial-like isoform X2 [Fragaria vesca subsp. vesca]; sp|Q8GWJ4|OSB3_ARATH Protein OSB3, chloroplastic/mitochondrial OS=Arabidopsis thaliana OX=3702 GN=OSB3 PE=2 SV=1; tr|A0A2P6Q745|A0A2P6Q745_ROSCH Putative primosome PriB/single-strand…	disorder_prediction; DNA replication; FvH4_3g12060.t1_v4.0.a2; NA-bd_OB-fold; Nucleic acid-binding proteins; Primosome_PriB/ssb; PROTEIN OSB2, CHLOROPLASTIC; single-stranded DNA binding; SINGLE-STRANDED DNA-BINDING PROTEIN; SSB; ssDNA-bd; Transcriptional activation of mitochondrial biogenesis	DNA replication; single-stranded DNA binding	GO:0003697; GO:0006260
TE_homo_35150	-3.70017	0.023056	Fvb3:7635814-7636243	Fvb3	7632094	7632919	FvH4_3g12742	+	2895	Downstream TTS	0	1	AT2G34930.1 | disease resistance family protein / LRR family protein | Chr2:14737169-14739886 REVERSE LENGTH=905 | 201606; PREDICTED: LRR receptor-like serine/threonine-protein kinase GSO1 [Fragaria vesca subsp. vesca]; sp|Q6JN46|EIX2_SOLLC Receptor-like protein EIX2 OS=Solanum lycopersicum OX=4081 GN=EIX2 PE=1 SV=2; tr|A0A2P6Q7P2|A0A2P6Q7P2_ROSCH Putative non-specific serine/threonine protein ki…	disorder_prediction; FAMILY NOT NAMED; FvH4_3g12742.t1_v4.0.a2; L domain-like; Leu-rich_rpt; LEURICHRPT; LRR; LRR_1; LRR_8; LRR_dom_sf; protein binding;	protein binding	GO:0005515
TE_homo_77708	-3.69023	0.0433721	Fvb4:25224096-25224458	Fvb4	25226645	25229163	FvH4_4g22390	+	2188	Upstream TSS	6.93802	0.235032	hypothetical protein RchiOBHm_Chr4g0428591 [Rosa chinensis]; tr|A0A2P6QZY4|A0A2P6QZY4_ROSCH Uncharacterized protein OS=Rosa chinensis OX=74649 GN=RchiOBHm_Chr4g0428591 PE=4 SV=1	FvH4_4g22390.t1_v4.0.a2	NA	NA
TE_homo_9512	-3.66672	2.95361e-05	Fvb1:18337804-18337966	Fvb1	18331406	18335312	FvH4_1g26510	-	2492	Upstream TSS	0.0266704	0.972352	AT1G10660.4 | transmembrane protein | Chr1:3533009-3534781 FORWARD LENGTH=320 | 201606; PREDICTED: uncharacterized protein LOC101295079 [Fragaria vesca subsp. vesca]; tr|A0A2P6RF96|A0A2P6RF96_ROSCH Uncharacterized protein OS=Rosa chinensis OX=74649 GN=RchiOBHm_Chr3g0486601 PE=4 SV=1	FvH4_1g26510.t1_v4.0.a2; ; UNCHARACTERIZED	NA	NA
TE_homo_126723	-3.65119	1.69497e-09	Fvb7:6607238-6607547	Fvb7	6603027	6605749	FvH4_7g06620	-	1489	Upstream TSS	NA	NA	PREDICTED: kinesin-related protein 4-like [Fragaria vesca subsp. vesca]	Coil; FvH4_7g06620.t1_v4.0.a2	NA	NA
TE_homo_40187	-3.60697	0.0010913	Fvb3:15342515-15342843	Fvb3	15344619	15347242	FvH4_3g22321	+	1777	Upstream TSS	-1.93947	0.00112167	AT1G32120.1 | serine/threonine-protein phosphatase 7 long form-like protein | Chr1:11552926-11555942 FORWARD LENGTH=978 | 201606; PREDICTED: uncharacterized protein LOC105350524 [Fragaria vesca subsp. vesca]; tr|A0A2P6QC30|A0A2P6QC30_ROSCH Uncharacterized protein OS=Rosa chinensis OX=74649 GN=RchiOBHm_Chr5g0038781 PE=4 SV=1	AminoTfrase-like_pln_mobile; AMINOTRANSFERASE-LIKE, PLANT MOBILE DOMAIN FAMILY PROTEIN; Coil; disorder_prediction; FAMILY NOT NAMED; FvH4_3g22321.t1_v4.0.a2; PMD	NA	NA
TE_homo_40187	-3.60697	0.0010913	Fvb3:15342515-15342843	Fvb3	15339842	15340620	FvH4_3g22310	+	1895	Downstream TTS	NA	NA	NA	FvH4_3g22310.t1_v4.0.a2	NA	NA
TE_homo_76852	-3.58323	0.00160747	Fvb4:23713194-23713636	Fvb4	23710790	23711303	FvH4_4g20440	-	1891	Upstream TSS	NA	NA	AT1G47960.2 | cell wall / vacuolar inhibitor of fructosidase 1 | Chr1:17682425-17683516 REVERSE LENGTH=166 | 201606; PREDICTED: cell wall / vacuolar inhibitor of fructosidase 1 [Fragaria vesca subsp. vesca]; sp|F4HWQ8|CVIF1_ARATH Cell wall / vacuolar inhibitor of fructosidase 1 OS=Arabidopsis thaliana OX=3702 GN=C/VIF1 PE=1 SV=1; tr|A0A2I4GTK9|A0A2I4GTK9_JUGRE cell wall / vacuolar inhibitor of fr…	CELL WALL / VACUOLAR INHIBITOR OF FRUCTOSIDASE 1; CIF_like; C/VIF1; enzyme inhibitor activity; FAMILY NOT NAMED; FvH4_4g20440.t1_v4.0.a2; Invertase/methylesterase_inhib; negative regulation of catalytic activity; Pectinesterase_inhib_dom; Plant invertase/pectin methylesterase inhibitor; PMEI; TIGR01614	enzyme inhibitor activity; negative regulation of catalytic activity	GO:0004857; GO:0043086
TE_homo_76852	-3.58323	0.00160747	Fvb4:23713194-23713636	Fvb4	23712331	23712595	FvH4_4g20450	-	599	Upstream TSS	-0.229265	0.813872	AT5G49525.1 | transmembrane protein | Chr5:20097132-20097374 REVERSE LENGTH=80 | 201606; PREDICTED: uncharacterized protein LOC105350667 [Fragaria vesca subsp. vesca]; tr|A0A2P6QZA9|A0A2P6QZA9_ROSCH Uncharacterized protein OS=Rosa chinensis OX=74649 GN=RchiOBHm_Chr4g0425921 PE=4 SV=1	FAMILY NOT NAMED; FvH4_4g20450.t1_v4.0.a2;	NA	NA
TE_homo_76852	-3.58323	0.00160747	Fvb4:23713194-23713636	Fvb4	23714914	23718358	FvH4_4g20460	+	1279	Upstream TSS	0.0879482	0.927682	AT1G47970.1 | nucleolin | Chr1:17687342-17688562 FORWARD LENGTH=198 | 201606; PREDICTED: prostatic spermine-binding protein-like [Fragaria vesca subsp. vesca]; tr|A0A1S4APY6|A0A1S4APY6_TOBAC prostatic spermine-binding protein-like OS=Nicotiana tabacum OX=4097 GN=LOC107800018 PE=4 SV=1	disorder_prediction; FAMILY NOT NAMED; FvH4_4g20460.t1_v4.0.a2	NA	NA
TE_homo_86611	-3.58174	0.0433721	Fvb5:11767923-11768276	Fvb5	11769202	11770680	FvH4_5g19970	+	927	Upstream TSS	NA	NA	AT4G25420.1 | 2-oxoglutarate (2OG) and Fe(II)-dependent oxygenase superfamily protein | Chr4:12990982-12992409 REVERSE LENGTH=377 | 201606; PREDICTED: gibberellin 20 oxidase 1-like [Fragaria vesca subsp. vesca]; sp|Q39110|GAOX1_ARATH Gibberellin 20 oxidase 1 OS=Arabidopsis thaliana OX=3702 GN=GA20OX1 PE=2 SV=2; tr|A0A314YLH2|A0A314YLH2_PRUYE Gibberellin 20 oxidase 1-like OS=Prunus yedoensis var. …	2OG-FeII_Oxy; Clavaminate synthase-like; DIOX_N; FE2OG_OXY; FvH4_5g19970.t1_v4.0.a2; IPNS-like; oxidation-reduction process; OXIDOREDUCTASE, 2OG-FE II OXYGENASE FAMILY PROTEIN; oxidoreductase activity; Oxoglu/Fe-dep_dioxygenase;	obsolete oxidation-reduction process; oxidoreductase activity	GO:0016491; GO:0055114
TE_homo_86611	-3.58174	0.0433721	Fvb5:11767923-11768276	Fvb5	11765807	11766645	FvH4_5g19960	+	1278	Downstream TTS	NA	NA	AT4G02320.1 | Plant invertase/pectin methylesterase inhibitor superfamily | Chr4:1022725-1026118 REVERSE LENGTH=518 | 201606; PREDICTED: probable pectinesterase/pectinesterase inhibitor 12 [Fragaria vesca subsp. vesca]; sp|O81301|PME40_ARATH Probable pectinesterase/pectinesterase inhibitor 40 OS=Arabidopsis thaliana OX=3702 GN=PME40 PE=2 SV=1; tr|A0A1U7X2P7|A0A1U7X2P7_NICSY pectinesterase-like OS…	cell wall modification; FAMILY NOT NAMED; FvH4_5g19960.t1_v4.0.a2; Pectin degradation I; Pectin degradation II; Pectinesterase; pectinesterase activity; Pectinesterase_cat; Pectin_lyase_fold/virulence; Pectin lyase-like; Pectin_lyas_fold; Pentose and glucuronate interconversions;	cell wall modification; pectinesterase activity	GO:0030599; GO:0042545
TE_homo_88749	-3.46373	0.000196926	Fvb5:15250949-15251368	Fvb5	15254307	15258330	FvH4_5g23970	-	2940	Downstream TTS	0.394646	0.495177	AT1G08400.1 | RINT-1 / TIP-1 family | Chr1:2643348-2646005 REVERSE LENGTH=804 | 201606; PREDICTED: RINT1-like protein MAG2L [Fragaria vesca subsp. vesca]; sp|Q8GXP1|MAG2L_ARATH RINT1-like protein MAG2L OS=Arabidopsis thaliana OX=3702 GN=MAG2L PE=2 SV=1; tr|A0A2P6PB03|A0A2P6PB03_ROSCH Uncharacterized protein OS=Rosa chinensis OX=74649 GN=RchiOBHm_Chr7g0213411 PE=4 SV=1	COPI-dependent Golgi-to-ER retrograde traffic; endoplasmic reticulum; FvH4_5g23970.t1_v4.0.a2; Golgi vesicle transport; RAD50-INTERACTING PROTEIN 1 RINT-1; RINT1-LIKE PROTEIN MAG2; RINT1_TIP1; RINT1_Tip20; RINT1_TIP20	endoplasmic reticulum; Golgi vesicle transport	GO:0005783; GO:0048193
TE_homo_118450	-3.45404	0.0014498	Fvb6:30553116-30553537	Fvb6	30554037	30555400	FvH4_6g38601	+	501	Upstream TSS	NA	NA	AT3G06240.1 | F-box family protein | Chr3:1887336-1888619 FORWARD LENGTH=427 | 201606; PREDICTED: uncharacterized protein LOC101303656 [Fragaria vesca subsp. vesca] &gt;gi|764628813|ref|XP_004308602.2| PREDICTED: uncharacterized protein LOC101303656 [Fragaria vesca subsp. vesca]; tr|A0A251Q2J2|A0A251Q2J2_PRUPE Uncharacterized protein OS=Prunus persica OX=3760 GN=PRUPE_3G191300 PE=4 SV=1	FAMILY NOT NAMED; F-box-assoc_interact_dom; FvH4_6g38601.t1_v4.0.a2; ; TIGR01640	NA	NA
TE_homo_80357	-3.32922	0.0307318	Fvb4:31066824-31067210	Fvb4	31069365	31069737	FvH4_4g32420	+	2156	Upstream TSS	-0.720445	0.14609	PREDICTED: wiskott-Aldrich syndrome protein family member 2-like [Malus domestica]; tr|A0A2P6R3A4|A0A2P6R3A4_ROSCH Uncharacterized protein OS=Rosa chinensis OX=74649 GN=RchiOBHm_Chr4g0441281 PE=4 SV=1	disorder_prediction; FAMILY NOT NAMED; FvH4_4g32420.t1_v4.0.a2; HYDROXYPROLINE-RICH GLYCOPROTEIN FAMILY PROTEIN	NA	NA
TE_homo_80357	-3.32922	0.0307318	Fvb4:31066824-31067210	Fvb4	31063616	31064537	FvH4_4g32400	+	2287	Downstream TTS	-2.52787	0.00129951	AT1G70990.1 | proline-rich family protein | Chr1:26767520-26768050 REVERSE LENGTH=176 | 201606; PREDICTED: protein trichome birefringence-like 32 [Fragaria vesca subsp. vesca]; tr|A0A2P6R3B7|A0A2P6R3B7_ROSCH Uncharacterized protein OS=Rosa chinensis OX=74649 GN=RchiOBHm_Chr4g0441241 PE=4 SV=1	disorder_prediction; FAMILY NOT NAMED; FvH4_4g32400.t1_v4.0.a2;	NA	NA
TE_homo_85987	-3.30675	0.00207715	Fvb5:10817927-10818342	Fvb5	10809496	10817464	FvH4_5g18830	-	463	Upstream TSS	-0.0550092	0.904564	AT2G35720.1 | DNAJ heat shock N-terminal domain-containing protein | Chr2:15016883-15019866 FORWARD LENGTH=538 | 201606; PREDICTED: chaperone protein dnaJ 13 [Fragaria vesca subsp. vesca]; sp|Q39079|DNJ13_ARATH Chaperone protein dnaJ 13 OS=Arabidopsis thaliana OX=3702 GN=ATJ13 PE=1 SV=2; tr|A0A2P6P8D9|A0A2P6P8D9_ROSCH Putative dnaJ-like protein C11 OS=Rosa chinensis OX=74649 GN=RchiOBHm_Chr7g0203…	AtJ13; Chaperone J-domain; Coil; Cristae formation; DnaJ; DNAJ_1; DNAJ_2; DnaJ_domain; DnaJ_domain_CS; DnaJ-like_C11_C; DUF3395; FAMILY NOT NAMED; FvH4_5g18830.t1_v4.0.a2; JDOMAIN; J_dom_sf	NA	NA
TE_homo_85987	-3.30675	0.00207715	Fvb5:10817927-10818342	Fvb5	10821011	10822751	FvH4_5g18832	+	2670	Upstream TSS	NA	NA	AT3G09510.1 | Ribonuclease H-like superfamily protein | Chr3:2921804-2923258 FORWARD LENGTH=484 | 201606; PREDICTED: uncharacterized protein LOC105350106 [Fragaria vesca subsp. vesca]; tr|M5VTR3|M5VTR3_PRUPE Uncharacterized protein (Fragment) OS=Prunus persica OX=3760 GN=PRUPE_ppb016510mg PE=4 SV=1	DNase I-like; Endo/exonu/phosph_ase_sf; FAMILY NOT NAMED; FvH4_5g18832.t1_v4.0.a2; nucleic acid binding; RNA-DNA hybrid ribonuclease activity; RNaseH_domain; RNase_H_like; RVT_3; RVT-Znf; zf-RVT	nucleic acid binding; RNA-DNA hybrid ribonuclease activity	GO:0003676; GO:0004523
TE_homo_86850	-3.2517	0.00883168	Fvb5:12228315-12228711	Fvb5	12230421	12234475	FvH4_5g20620	-	1711	Downstream TTS	NA	NA	PREDICTED: uncharacterized protein LOC105350145 [Fragaria vesca subsp. vesca]; tr|A0A251PB03|A0A251PB03_PRUPE Uncharacterized protein OS=Prunus persica OX=3760 GN=PRUPE_5G199500 PE=4 SV=1	Coil; disorder_prediction; FAMILY NOT NAMED; FvH4_5g20620.t1_v4.0.a2;	NA	NA
TE_homo_28901	-3.18296	0.000691329	Fvb2:21336309-21336750	Fvb2	21337638	21338177	FvH4_2g26601	+	889	Upstream TSS	NA	NA	AT5G45050.2 | Disease resistance protein (TIR-NBS-LRR class) | Chr5:18177016-18181805 REVERSE LENGTH=1344 | 201606; putative TIR domain, winged helix-turn-helix DNA-binding domain-containing protein [Rosa chinensis]; sp|Q9FL92|RRS1B_ARATH Disease resistance protein RRS1B OS=Arabidopsis thaliana OX=3702 GN=RRS1B PE=1 SV=1; tr|A0A2P6PXC4|A0A2P6PXC4_ROSCH Putative TIR domain, winged helix-turn-helix…	DISEASE RESISTANCE PROTEIN (TIR-NBS-LRR CLASS); FvH4_2g26601.t1_v4.0.a2; LEUCINE-RICH REPEAT-CONTAINING PROTEIN; &quot;Winged helix&quot; DNA-binding domain; WH_DNA-bd_sf	NA	NA
TE_homo_72099	-3.15478	0.0139188	Fvb4:17405487-17406157	Fvb4	17408273	17411443	FvH4_4g13891	+	2117	Upstream TSS	NA	NA	PREDICTED: uncharacterized protein LOC101310148 [Fragaria vesca subsp. vesca]; tr|A0A2N9IC23|A0A2N9IC23_FAGSY Uncharacterized protein OS=Fagus sylvatica OX=28930 GN=FSB_LOCUS49727 PE=4 SV=1	disorder_prediction; DUF4216; DUF4218; FvH4_4g13891.t1_v4.0.a2; ; Transposase_21; UNCHARACTERIZED	NA	NA
TE_homo_120489	-3.14951	0.0077523	Fvb6:34302255-34302547	Fvb6	34298579	34299291	FvH4_6g44540	-	2964	Upstream TSS	NA	NA	AT3G63310.1 | Bax inhibitor-1 family protein | Chr3:23387938-23388882 REVERSE LENGTH=239 | 201606; PREDICTED: BI1-like protein [Fragaria vesca subsp. vesca]; sp|Q9M1V9|LFG2_ARATH Protein LIFEGUARD 2 OS=Arabidopsis thaliana OX=3702 GN=LFG2 PE=2 SV=1; tr|A0A2P6PVT2|A0A2P6PVT2_ROSCH Uncharacterized protein OS=Rosa chinensis OX=74649 GN=RchiOBHm_Chr6g0290181 PE=3 SV=1	Bax1-I; Bax_inhibitor_1-related; BAX INHIBITOR-RELATED; FvH4_6g44540.t1_v4.0.a2;	NA	NA
TE_homo_120489	-3.14951	0.0077523	Fvb6:34302255-34302547	Fvb6	34304075	34304608	FvH4_6g44541	+	1529	Upstream TSS	NA	NA	AT4G16740.1 | terpene synthase 03 | Chr4:9407856-9410877 FORWARD LENGTH=565 | 201606; PREDICTED: tricyclene synthase EBOS, chloroplastic-like [Fragaria vesca subsp. vesca]; sp|B9T825|TPS12_RICCO Probable terpene synthase 12 OS=Ricinus communis OX=3988 GN=TPS12 PE=3 SV=1; tr|A0A2P6REV6|A0A2P6REV6_ROSCH Putative lyase OS=Rosa chinensis OX=74649 GN=RchiOBHm_Chr3g0484891 PE=3 SV=1	FAMILY NOT NAMED; FvH4_6g44541.t1_v4.0.a2; lyase activity; ; Terpene_synth; terpene synthase activity; Terpene_synth_N; Terpene_synth_N_sf; Terpenoid_cyclase/PrenylTrfase; Terpenoid cyclases/Protein prenyltransferases	lyase activity; terpene synthase activity	GO:0010333; GO:0016829
TE_homo_52676	-3.12835	0.0145366	Fvb3:29727762-29728201	Fvb3	29729955	29733169	FvH4_3g34260	-	1755	Downstream TTS	NA	NA	AT5G41460.1 | transferring glycosyl group transferase (DUF604) | Chr5:16589724-16592197 REVERSE LENGTH=524 | 201606; PREDICTED: uncharacterized protein LOC101307385 [Fragaria vesca subsp. vesca]; tr|A0A2P6QI03|A0A2P6QI03_ROSCH Putative N-acetylgalactosaminide beta-1,3-galactosyltransferase OS=Rosa chinensis OX=74649 GN=RchiOBHm_Chr5g0061811 PE=4 SV=1	DUF604; FRINGE-RELATED; FvH4_3g34260.t1_v4.0.a2; GLYCOSYLTRANSFERASE	NA	NA
TE_homo_118322	-3.10182	0.0279905	Fvb6:30268725-30268992	Fvb6	30259641	30266558	FvH4_6g38250	+	2167	Downstream TTS	0.875419	0.00653833	AT1G29400.3 | MEI2-like protein 5 | Chr1:10290393-10293696 REVERSE LENGTH=800 | 201606; PREDICTED: protein MEI2-like 2 [Fragaria vesca subsp. vesca]; sp|Q6ZI17|OML2_ORYSJ Protein MEI2-like 2 OS=Oryza sativa subsp. japonica OX=39947 GN=ML2 PE=2 SV=1; tr|A0A2P6S071|A0A2P6S071_ROSCH Putative RNA recognition motif 2, nucleotide-binding alpha-beta plait domain-containing protein OS=Rosa chinensis OX=7…	disorder_prediction; FvH4_6g38250.t1_v4.0.a2; MEI2-like_RRM1; MEI2-like_RRM3; Mei2-like_Rrm_C; nucleic acid binding; Nucleotide-bd_a/b_plait_sf; PROTEIN MEI2-LIKE 3; RBD_domain_sf; RNA-binding domain, RBD; RRM; RRM_1; RRM1_MEI2_like; RRM_2; RRM2_MEI2_like; RRM3_MEI2_like; RRM_dom; SERINE/ARGININE RICH SPLICING FACTOR	nucleic acid binding	GO:0003676
TE_homo_23695	-3.0565	0.0271576	Fvb2:12495094-12495671	Fvb2	12497854	12499977	FvH4_2g14220	-	2184	Downstream TTS	4.12916	0.00103007	PREDICTED: extensin-3-like [Fragaria vesca subsp. vesca]; tr|A0A2P6PK86|A0A2P6PK86_ROSCH Uncharacterized protein OS=Rosa chinensis OX=74649 GN=RchiOBHm_Chr6g0249201 PE=4 SV=1	disorder_prediction; FvH4_2g14220.t1_v4.0.a2; PRICHEXTENSN	NA	NA
TE_homo_23020	-2.97655	0.0219453	Fvb2:11646162-11646342	Fvb2	11649337	11649714	FvH4_2g13342	-	2996	Downstream TTS	NA	NA	NA	FvH4_2g13342.t1_v4.0.a2	NA	NA
TE_homo_25565	-2.97362	0.0171574	Fvb2:15258386-15258695	Fvb2	15255648	15257159	FvH4_2g17770	+	1227	Downstream TTS	NA	NA	NA	FvH4_2g17770.t1_v4.0.a2	NA	NA
TE_homo_25565	-2.97362	0.0171574	Fvb2:15258386-15258695	Fvb2	15259879	15265082	FvH4_2g17780	-	1185	Downstream TTS	5.80826	5.03397e-22	AT5G48460.1 | Actin binding Calponin homology (CH) domain-containing protein | Chr5:19636225-19639365 REVERSE LENGTH=654 | 201606; PREDICTED: fimbrin-2 [Fragaria vesca subsp. vesca]; sp|O50064|FIMB2_ARATH Fimbrin-2 OS=Arabidopsis thaliana OX=3702 GN=FIM2 PE=2 SV=1; tr|A0A2P6PTY1|A0A2P6PTY1_ROSCH Putative calponin domain-containing protein OS=Rosa chinensis OX=74649 GN=RchiOBHm_Chr6g0282801 PE=4 S…	actin filament binding; actin filament bundle assembly; Calponin-homology domain, CH-domain; CH; CH-domain; CH_dom_sf; Coil; disorder_prediction; Fimbrin/Plastin; FIMBRIN/PLASTIN; FvH4_2g17780.t1_v4.0.a2; protein binding;	actin filament binding; actin filament bundle assembly; protein binding	GO:0005515; GO:0051015; GO:0051017
TE_homo_92662	-2.96407	0.00138417	Fvb5:20492374-20492787	Fvb5	20489136	20491823	FvH4_5g29550	-	551	Upstream TSS	-2.42423	0.000576019	AT1G10780.2 | F-box/RNI-like superfamily protein | Chr1:3592875-3594328 REVERSE LENGTH=424 | 201606; PREDICTED: F-box protein At1g10780 isoform X1 [Fragaria vesca subsp. vesca]; sp|Q9SAC4|FB2_ARATH F-box protein At1g10780 OS=Arabidopsis thaliana OX=3702 GN=At1g10780 PE=2 SV=1; tr|A0A2P6PDB5|A0A2P6PDB5_ROSCH Putative F-box domain, leucine-rich repeat domain, L domain-containing protein OS=Rosa chi…	FAMILY NOT NAMED; F-box_dom; F-box domain; F-box-like; F-box-like_dom_sf; FvH4_5g29550.t1_v4.0.a2; LRR_dom_sf; protein binding; RNI-like;	protein binding	GO:0005515
TE_homo_124084	-2.91763	0.0114676	Fvb7:2663706-2664018	Fvb7	2665535	2667704	FvH4_7g02370	-	1518	Downstream TTS	-1.04996	0.0224696	AT1G52340.1 | NAD(P)-binding Rossmann-fold superfamily protein | Chr1:19489997-19491527 REVERSE LENGTH=285 | 201606; PREDICTED: xanthoxin dehydrogenase [Fragaria vesca subsp. vesca]; sp|Q9C826|ABA2_ARATH Xanthoxin dehydrogenase OS=Arabidopsis thaliana OX=3702 GN=ABA2 PE=1 SV=1; tr|A0A2P6S8L1|A0A2P6S8L1_ROSCH Putative xanthoxin dehydrogenase OS=Rosa chinensis OX=74649 GN=RchiOBHm_Chr1g0319721 PE=4…	adh_short_C2; FAMILY NOT NAMED; FvH4_7g02370.t1_v4.0.a2; GDHRDH; NAD(P)-bd_dom_sf; NAD(P)-binding Rossmann-fold domains; SDR_fam; SDRFAMILY; secoisolariciresinol-DH_like_SDR_c; XANTHOXIN DEHYDROGENASE	NA	NA
TE_homo_85196	-2.89583	0.02792	Fvb5:9225847-9226195	Fvb5	9222637	9224548	FvH4_5g16170	-	1299	Upstream TSS	1.30238	0.000104187	AT1G19000.2 | Homeodomain-like superfamily protein | Chr1:6561335-6562684 REVERSE LENGTH=285 | 201606; PREDICTED: LOW QUALITY PROTEIN: transcription factor MYB1R1 [Fragaria vesca subsp. vesca]; sp|Q2V9B0|MY1R1_SOLTU Transcription factor MYB1R1 OS=Solanum tuberosum OX=4113 PE=2 SV=1; tr|A0A2P6P2B6|A0A2P6P2B6_ROSCH Putative transcription factor MYB-HB-like family OS=Rosa chinensis OX=74649 GN=RchiO…	disorder_prediction; DNA binding; FvH4_5g16170.t1_v4.0.a2; Homeobox-like_sf; Homeodomain-like; HTH_MYB; Myb_DNA-binding; Myb_dom; Myb_dom_plants; SANT; SANT/Myb; ; TIGR01557; TRANSCRIPTIONAL ADAPTOR 2 ADA2 -RELATED	DNA binding	GO:0003677
TE_homo_85196	-2.89583	0.02792	Fvb5:9225847-9226195	Fvb5	9228411	9232846	FvH4_5g16180	-	2217	Downstream TTS	2.83061	2.89181e-22	AT1G74850.1 | plastid transcriptionally active 2 | Chr1:28119237-28122314 REVERSE LENGTH=862 | 201606; PREDICTED: pentatricopeptide repeat-containing protein At1g74850, chloroplastic [Fragaria vesca subsp. vesca]; sp|Q9S7Q2|PP124_ARATH Pentatricopeptide repeat-containing protein At1g74850, chloroplastic OS=Arabidopsis thaliana OX=3702 GN=PTAC2 PE=2 SV=1; tr|A0A2P6P293|A0A2P6P293_ROSCH Putative Sm…	disorder_prediction; FAMILY NOT NAMED; FvH4_5g16180.t1_v4.0.a2; Pentatricopeptide_repeat; PPR; PPR_2; PPR_3; protein binding; SMR; Smr_dom; TIGR00756; TPR-like_helical_dom_sf	protein binding	GO:0005515
TE_homo_94141	-2.79545	0.000437481	Fvb5:22453475-22453769	Fvb5	22450253	22451018	FvH4_5g31471	+	2457	Downstream TTS	NA	NA	NA	disorder_prediction; FvH4_5g31471.t1_v4.0.a2	NA	NA
TE_homo_46142	-2.76518	0.00623094	Fvb3:22267047-22267389	Fvb3	22263703	22264183	FvH4_3g29142	+	2864	Downstream TTS	NA	NA	tr|A0A2P6Q8F7|A0A2P6Q8F7_ROSCH Uncharacterized protein OS=Rosa chinensis OX=74649 GN=RchiOBHm_Chr5g0024901 PE=4 SV=1	FvH4_3g29142.t1_v4.0.a2	NA	NA
TE_homo_120890	-2.73305	0.000135668	Fvb6:35293819-35294113	Fvb6	35291725	35293750	FvH4_6g46230	-	69	Upstream TSS	0.484771	0.420724	PREDICTED: uncharacterized protein LOC101308007 [Fragaria vesca subsp. vesca]; tr|A0A0F9DIR5|A0A0F9DIR5_9ZZZZ Uncharacterized protein (Fragment) OS=marine sediment metagenome OX=412755 GN=LCGC14_2194310 PE=4 SV=1	disorder_prediction; FvH4_6g46230.t1_v4.0.a2; Hexapep_transf_CS; HEXAPEP_TRANSFERASES; Synthesis of GDP-mannose; transferase activity; Trimeric LpxA-like enzymes; Trimer_LpxA-like_sf	transferase activity	GO:0016740
TE_homo_120890	-2.73305	0.000135668	Fvb6:35293819-35294113	Fvb6	35286846	35292737	FvH4_6g46210	+	1082	Downstream TTS	-0.193193	0.544588	AT3G30300.2 | O-fucosyltransferase family protein | Chr3:11921390-11924254 REVERSE LENGTH=677 | 201606; PREDICTED: uncharacterized protein At1g04910 [Fragaria vesca subsp. vesca]; sp|Q8GZ81|OFT27_ARATH O-fucosyltransferase 27 OS=Arabidopsis thaliana OX=3702 GN=OFUT27 PE=2 SV=1; tr|A0A2P6S3L1|A0A2P6S3L1_ROSCH Putative GDP-fucose protein O-fucosyltransferase OS=Rosa chinensis OX=74649 GN=RchiOBHm_C…	disorder_prediction; FAMILY NOT NAMED; FvH4_6g46210.t1_v4.0.a2; GDP-Fuc_O-FucTrfase; O-FUCOSYLTRANSFERASE 27; O-FucT	NA	NA
TE_homo_99747	-2.72739	0.0449331	Fvb6:2705516-2705821	Fvb6	2700981	2704780	FvH4_6g04870	-	736	Upstream TSS	-0.0141488	0.983774	AT2G26430.1 | arginine-rich cyclin 1 | Chr2:11243433-11245504 REVERSE LENGTH=416 | 201606; PREDICTED: cyclin-L1-1 [Fragaria vesca subsp. vesca]; sp|Q8RWV3|CCL11_ARATH Cyclin-L1-1 OS=Arabidopsis thaliana OX=3702 GN=CYCL1-1 PE=1 SV=2; tr|A0A2P6R6L2|A0A2P6R6L2_ROSCH Putative cyclin L/T OS=Rosa chinensis OX=74649 GN=RchiOBHm_Chr3g0453411 PE=3 SV=1	CYCLIN; Cyclin_L; CYCLIN L1A-RELATED; Cyclin-like; Cyclin-like_sf; Cyclin_N; disorder_prediction; FvH4_6g04870.t1_v4.0.a2	NA	NA
TE_homo_117315	-2.69972	0.00266544	Fvb6:28522951-28523362	Fvb6	28518722	28521356	FvH4_6g36270	-	1595	Upstream TSS	-6.04522	3.33925e-16	AT5G66460.1 | Glycosyl hydrolase superfamily protein | Chr5:26538911-26540837 REVERSE LENGTH=431 | 201606; PREDICTED: mannan endo-1,4-beta-mannosidase 4-like [Fragaria vesca subsp. vesca]; sp|Q8L5J1|MAN4_SOLLC Mannan endo-1,4-beta-mannosidase 4 OS=Solanum lycopersicum OX=4081 GN=MAN4 PE=1 SV=2; tr|A0A2P6RZD3|A0A2P6RZD3_ROSCH Putative mannan endo-1,4-beta-mannosidase OS=Rosa chinensis OX=74649 GN=…	carbohydrate metabolic process; Cellulase; FAMILY NOT NAMED; FvH4_6g36270.t1_v4.0.a2; Glyco_hydro_5; Glycoside_hydrolase_SF; hydrolase activity, hydrolyzing O-glycosyl compounds; ; (Trans)glycosidases	carbohydrate metabolic process; hydrolase activity, hydrolyzing O-glycosyl compounds	GO:0004553; GO:0005975
TE_struc_57	-2.66115	0.000162574	Fvb1:4500685-4501073	Fvb1	4498082	4499877	FvH4_1g08454	+	808	Downstream TTS	3.45982	0.0148545	AT2G06050.3 | oxophytodienoate-reductase 3 | Chr2:2359240-2361971 REVERSE LENGTH=391 | 201606; PREDICTED: 12-oxophytodienoate reductase 3-like [Fragaria vesca subsp. vesca]; sp|Q9FEW9|OPR3_SOLLC 12-oxophytodienoate reductase 3 OS=Solanum lycopersicum OX=4081 GN=OPR3 PE=1 SV=1; tr|A0A2P6RKL7|A0A2P6RKL7_ROSCH Putative 12-oxophytodienoate reductase OS=Rosa chinensis OX=74649 GN=RchiOBHm_Chr2g0094631…	12-OXOPHYTODIENOATE REDUCTASE 3; Aldolase_TIM; catalytic activity; FMN binding; FMN-linked oxidoreductases; FvH4_1g08454.t1_v4.0.a2; NADH OXIDOREDUCTASE-RELATED; oxidation-reduction process; Oxidored_FMN; oxidoreductase activity; OxRdtase_FMN_N; OYE_like_FMN	catalytic activity; FMN binding; obsolete oxidation-reduction process; oxidoreductase activity	GO:0003824; GO:0010181; GO:0016491; GO:0055114
TE_homo_22736	-2.65052	0.0150979	Fvb2:11254124-11254236	Fvb2	11255524	11258798	FvH4_2g12801	-	1289	Downstream TTS	2.69907	2.46449e-05	AT2G33260.2 | Tryptophan/tyrosine permease | Chr2:14100840-14102564 REVERSE LENGTH=540 | 201606; PREDICTED: uncharacterized protein LOC101306011 [Fragaria vesca subsp. vesca]; sp|P44614|MTR_HAEIN Tryptophan-specific transport protein OS=Haemophilus influenzae (strain ATCC 51907 / DSM 11121 / KW20 / Rd) OX=71421 GN=mtr PE=3 SV=1; tr|M5VWF7|M5VWF7_PRUPE Uncharacterized protein OS=Prunus persica OX=…	amino acid transmembrane transport; Amino_acid_transport_2; FAMILY NOT NAMED; FvH4_2g12801.t1_v4.0.a2; Trp_Tyr_perm	amino acid transmembrane transport	GO:0003333
TE_homo_32796	-2.61814	0.002593	Fvb3:2697100-2697499	Fvb3	2699089	2701388	FvH4_3g04720	+	1591	Upstream TSS	-1.15815	0.0554902	AT1G61065.1 | 1%2C3-beta-glucan synthase component (DUF1218) | Chr1:22490430-22491330 REVERSE LENGTH=180 | 201606; PREDICTED: uncharacterized protein LOC101314921 [Fragaria vesca subsp. vesca]; tr|A0A2P6Q3X3|A0A2P6Q3X3_ROSCH Uncharacterized protein OS=Rosa chinensis OX=74649 GN=RchiOBHm_Chr5g0007741 PE=4 SV=1	1,3-BETA-GLUCAN SYNTHASE COMPONENT (DUF1218); DUF1218; FAMILY NOT NAMED; FvH4_3g04720.t1_v4.0.a2; Modifying_wall_lignin1/2	NA	NA
TE_homo_32796	-2.61814	0.002593	Fvb3:2697100-2697499	Fvb3	2695814	2696647	FvH4_3g04710	+	453	Downstream TTS	2.81586	0.0935419	NA	FvH4_3g04710.t1_v4.0.a2	NA	NA
TE_struc_582	-2.6117	0.0139188	Fvb2:13603709-13604187	Fvb2	13605799	13609098	FvH4_2g15460	+	1613	Upstream TSS	NA	NA	AT2G16910.1 | basic helix-loop-helix (bHLH) DNA-binding superfamily protein | Chr2:7331721-7334077 FORWARD LENGTH=571 | 201606; PREDICTED: transcription factor ABORTED MICROSPORES-like isoform X2 [Fragaria vesca subsp. vesca]; sp|Q9ZVX2|AMS_ARATH Transcription factor ABORTED MICROSPORES OS=Arabidopsis thaliana OX=3702 GN=AMS PE=1 SV=2; tr|A0A2P6PSS1|A0A2P6PSS1_ROSCH Putative transcription factor …	ACT_UUR-ACR-like; BHLH; bHLH_dom; bHLH-MYC_N; Coil; disorder_prediction; FAMILY NOT NAMED; FvH4_2g15460.t1_v4.0.a2; HLH; HLH_DNA-bd_sf; HLH, helix-loop-helix DNA-binding domain; MYC/MYB_N; protein dimerization activity; TRANSCRIPTION FACTOR ABORTED MICROSPORES	protein dimerization activity	GO:0046983
TE_homo_58780	-2.58814	0.0422815	Fvb4:1194479-1194737	Fvb4	1196988	1200607	FvH4_4g01312	-	2252	Downstream TTS	-1.89671	0.00860718	NA	disorder_prediction; FvH4_4g01312.t1_v4.0.a2	NA	NA
TE_homo_84377	-2.5641	0.0277409	Fvb5:7407660-7408011	Fvb5	7410361	7412175	FvH4_5g13113	-	2351	Downstream TTS	NA	NA	NA	FvH4_5g13113.t1_v4.0.a2	NA	NA
TE_homo_61976	-2.55829	0.0311456	Fvb4:5659026-5659429	Fvb4	5660655	5661153	FvH4_4g06350	+	1227	Upstream TSS	-0.0710592	0.967078	AT5G07610.1 | F-box family protein | Chr5:2406068-2407330 FORWARD LENGTH=420 | 201606; F-box protein At5g07610-like [Rosa chinensis] &gt;gi|1358162365|gb|PRQ36842.1| putative F-box domain-containing protein [Rosa chinensis]; sp|Q9FLS0|FB253_ARATH F-box protein At5g07610 OS=Arabidopsis thaliana OX=3702 GN=At5g07610 PE=2 SV=1; tr|A0A2P6QRN6|A0A2P6QRN6_ROSCH Putative F-box domain-containing protein …	FAMILY NOT NAMED; F-box; F-box_dom; F-box domain; F-box-like_dom_sf; FvH4_4g06350.t1_v4.0.a2; protein binding;	protein binding	GO:0005515
TE_homo_61976	-2.55829	0.0311456	Fvb4:5659026-5659429	Fvb4	5661195	5661825	FvH4_4g06360	+	1767	Upstream TSS	-0.249242	0.789014	AT5G07610.1 | F-box family protein | Chr5:2406068-2407330 FORWARD LENGTH=420 | 201606; PREDICTED: F-box protein At5g07610-like [Fragaria vesca subsp. vesca] &gt;gi|764586929|ref|XP_011464707.1| PREDICTED: F-box protein At5g07610-like [Fragaria vesca subsp. vesca]; sp|Q9FLS0|FB253_ARATH F-box protein At5g07610 OS=Arabidopsis thaliana OX=3702 GN=At5g07610 PE=2 SV=1; tr|A0A314Z0W0|A0A314Z0W0_PRUYE F…	FAMILY NOT NAMED; FvH4_4g06360.t1_v4.0.a2;	NA	NA
TE_homo_55987	-2.52044	0.00152443	Fvb3:34776876-34777262	Fvb3	34774231	34774861	FvH4_3g41410	-	2015	Upstream TSS	NA	NA	NA	FvH4_3g41410.t1_v4.0.a2	NA	NA
TE_homo_55987	-2.52044	0.00152443	Fvb3:34776876-34777262	Fvb3	34779511	34783454	FvH4_3g41420	+	2250	Upstream TSS	-1.08379	0.00367818	AT1G55610.2 | BRI1 like | Chr1:20779874-20783374 REVERSE LENGTH=1166 | 201606; PREDICTED: receptor-like protein kinase BRI1-like 3 [Fragaria vesca subsp. vesca]; sp|Q9ZWC8|BRL1_ARATH Serine/threonine-protein kinase BRI1-like 1 OS=Arabidopsis thaliana OX=3702 GN=BRL1 PE=1 SV=1; tr|A0A2P6QL72|A0A2P6QL72_ROSCH Uncharacterized protein OS=Rosa chinensis OX=74649 GN=RchiOBHm_Chr5g0074401 PE=3 SV=1	ATP binding; FAMILY NOT NAMED; FvH4_3g41420.t1_v4.0.a2; Kinase-like_dom_sf; Leu-rich_rpt; Leu-rich_rpt_4; LRR_4; LRR_6; LRR_8; LRR_dom_sf; LRR_N_plant-typ; LRRNT_2; Pkinase; protein binding; protein kinase activity; PROTEIN_KINASE_ATP; Protein_kinase_ATP_BS; PROTEIN_KINASE_DOM; Protein kinase-like (PK-like); PROTEIN_KINASE_ST; protein phosphorylation; Prot_kinase_dom; RNI-like; SERINE/THREONINE-P…	ATP binding; protein binding; protein kinase activity; protein phosphorylation	GO:0004672; GO:0005515; GO:0005524; GO:0006468
TE_homo_95632	-2.46333	0.00315235	Fvb5:24794273-24794557	Fvb5	24793462	24794218	FvH4_5g34112	+	55	Downstream TTS	NA	NA	tr|A0A059ANB4|A0A059ANB4_EUCGR Uncharacterized protein OS=Eucalyptus grandis OX=71139 GN=EUGRSUZ_I01257 PE=4 SV=1	FvH4_5g34112.t1_v4.0.a2	NA	NA
TE_homo_105821	-2.41359	0.0131579	Fvb6:13320032-13320429	Fvb6	13317335	13318077	FvH4_6g19840	-	1955	Upstream TSS	NA	NA	tr|A0A2P6RLX8|A0A2P6RLX8_ROSCH Uncharacterized protein OS=Rosa chinensis OX=74649 GN=RchiOBHm_Chr2g0099411 PE=4 SV=1	disorder_prediction; FvH4_6g19840.t1_v4.0.a2	NA	NA
TE_homo_105821	-2.41359	0.0131579	Fvb6:13320032-13320429	Fvb6	13321027	13323909	FvH4_6g19850	+	599	Upstream TSS	-1.08733	4.94281e-10	AT2G36060.1 | MMS ZWEI homologue 3 | Chr2:15143012-15143998 REVERSE LENGTH=145 | 201606; PREDICTED: ubiquitin-conjugating enzyme E2 variant 1C [Fragaria vesca subsp. vesca]; sp|Q9SJ44|UEV1C_ARATH Ubiquitin-conjugating enzyme E2 variant 1C OS=Arabidopsis thaliana OX=3702 GN=UEV1C PE=1 SV=1; tr|A0A2P6RCD6|A0A2P6RCD6_ROSCH Putative aminoacyltransferase, E1 ubiquitin-activating enzyme OS=Rosa chinens…	Antigen processing: Ubiquitination &amp; Proteasome degradation; FAMILY NOT NAMED; FvH4_6g19850.t1_v4.0.a2; ; UBC-like; UBIQUITIN_CONJUGAT_2; UBQ-conjugat_E2; UBQ-conjugating_enzyme/RWD; UQ_con	NA	NA
TE_homo_105821	-2.41359	0.0131579	Fvb6:13320032-13320429	Fvb6	13316138	13317056	FvH4_6g19830	+	2976	Downstream TTS	NA	NA	NA	FvH4_6g19830.t1_v4.0.a2	NA	NA
TE_homo_17183	-2.35902	0.033329	Fvb2:3827665-3827933	Fvb2	3825513	3826999	FvH4_2g04887	-	666	Upstream TSS	NA	NA	hypothetical protein RchiOBHm_Chr6g0254681 [Rosa chinensis]; tr|A0A2P6PLM7|A0A2P6PLM7_ROSCH Uncharacterized protein OS=Rosa chinensis OX=74649 GN=RchiOBHm_Chr6g0254681 PE=4 SV=1	disorder_prediction; FAMILY NOT NAMED; F-box; F-box_dom; F-box domain; F-box-like_dom_sf; FvH4_2g04887.t1_v4.0.a2; protein binding;	protein binding	GO:0005515
TE_homo_25557	-2.3403	0.0107504	Fvb2:15244519-15245004	Fvb2	15242702	15244307	FvH4_2g17740	+	212	Downstream TTS	NA	NA	AT4G34370.1 | RING/U-box superfamily protein | Chr4:16434547-16437037 FORWARD LENGTH=597 | 201606; PREDICTED: probable E3 ubiquitin-protein ligase ARI1 [Fragaria vesca subsp. vesca]; sp|Q949V6|ARI1_ARATH Probable E3 ubiquitin-protein ligase ARI1 OS=Arabidopsis thaliana OX=3702 GN=ARI1 PE=2 SV=1; tr|A0A2P6PYF6|A0A2P6PYF6_ROSCH RBR-type E3 ubiquitin transferase OS=Rosa chinensis OX=74649 GN=RchiOBH…	disorder_prediction; E3 UBIQUITIN-PROTEIN LIGASE ARI2-RELATED; E3_UB_ligase_RBR; FvH4_2g17740.t1_v4.0.a2; IBR; IBR_dom; protein ubiquitination; RBR FAMILY RING FINGER AND IBR DOMAIN-CONTAINING; RING/U-box; TRIAD; ubiquitin-protein transferase activity; ZF_RING_2; Znf_RING; Znf_RING/FYVE/PHD	protein ubiquitination; ubiquitin-protein transferase activity	GO:0004842; GO:0016567
TE_homo_87256	-2.31839	0.00430061	Fvb5:12873061-12873480	Fvb5	12876197	12882248	FvH4_5g21360	+	2718	Upstream TSS	0.513472	0.667276	AT4G25300.1 | 2-oxoglutarate (2OG) and Fe(II)-dependent oxygenase superfamily protein | Chr4:12945263-12946642 FORWARD LENGTH=356 | 201606; PREDICTED: S-norcoclaurine synthase 1-like [Fragaria vesca subsp. vesca]; sp|A2A1A0|NCS1_COPJA S-norcoclaurine synthase 1 OS=Coptis japonica OX=3442 GN=NCS1 PE=1 SV=1; tr|A0A2P6P9S2|A0A2P6P9S2_ROSCH Putative (S)-norcoclaurine synthase OS=Rosa chinensis OX=746…	2OG-FeII_Oxy; Clavaminate synthase-like; Coil; DIOX_N; disorder_prediction; FE2OG_OXY; FvH4_5g21360.t1_v4.0.a2; IPNS-like; oxidation-reduction process; OXIDOREDUCTASE, 2OG-FE II OXYGENASE FAMILY PROTEIN; oxidoreductase activity; Oxoglu/Fe-dep_dioxygenase;	obsolete oxidation-reduction process; oxidoreductase activity	GO:0016491; GO:0055114
TE_homo_87256	-2.31839	0.00430061	Fvb5:12873061-12873480	Fvb5	12870798	12871446	FvH4_5g21340	+	1615	Downstream TTS	NA	NA	AT2G17980.1 | Sec1/munc18-like (SM) proteins superfamily | Chr2:7824352-7826404 FORWARD LENGTH=627 | 201606; SEC1 family transport protein SLY1 [Rosa chinensis] &gt;gi|1358145701|gb|PRQ20181.1| putative sec1-like protein [Rosa chinensis]; sp|Q9SL48|SLY1_ARATH SEC1 family transport protein SLY1 OS=Arabidopsis thaliana OX=3702 GN=SLY1 PE=1 SV=1; tr|A0A2P6PE28|A0A2P6PE28_ROSCH Putative sec1-like pro…	FvH4_5g21340.t1_v4.0.a2; Sec1; SEC1 FAMILY DOMAIN-CONTAINING PROTEIN 1; Sec1-like; Sec-1-like_dom2; Sec1-like_sf; Sec1/munc18-like (SM) proteins; vesicle docking involved in exocytosis; vesicle-mediated transport; VESICLE PROTEIN SORTING-ASSOCIATED	vesicle docking involved in exocytosis; vesicle-mediated transport	GO:0006904; GO:0016192
TE_homo_87256	-2.31839	0.00430061	Fvb5:12873061-12873480	Fvb5	12871646	12872736	FvH4_5g21350	+	325	Downstream TTS	NA	NA	AT2G17980.1 | Sec1/munc18-like (SM) proteins superfamily | Chr2:7824352-7826404 FORWARD LENGTH=627 | 201606; PREDICTED: SEC1 family transport protein SLY1 [Fragaria vesca subsp. vesca]; sp|Q9SL48|SLY1_ARATH SEC1 family transport protein SLY1 OS=Arabidopsis thaliana OX=3702 GN=SLY1 PE=1 SV=1; tr|A0A2P6PE28|A0A2P6PE28_ROSCH Putative sec1-like protein OS=Rosa chinensis OX=74649 GN=RchiOBHm_Chr7g0225…	FvH4_5g21350.t1_v4.0.a2; Sec1; Sec1-like; Sec-1-like_dom2; Sec1-like_sf; Sec1/munc18-like (SM) proteins; ; vesicle docking involved in exocytosis; vesicle-mediated transport; VESICLE PROTEIN SORTING-ASSOCIATED	vesicle docking involved in exocytosis; vesicle-mediated transport	GO:0006904; GO:0016192
TE_homo_80341	-2.27503	0.0434892	Fvb4:31038688-31039074	Fvb4	31032365	31036461	FvH4_4g32330	-	2227	Upstream TSS	-1.30875	0.0137394	AT2G01350.1 | quinolinate phoshoribosyltransferase | Chr2:165332-167209 REVERSE LENGTH=348 | 201606; PREDICTED: nicotinate-nucleotide pyrophosphorylase [carboxylating], chloroplastic [Fragaria vesca subsp. vesca]; sp|Q9ZU32|NADC_ARATH Nicotinate-nucleotide pyrophosphorylase [carboxylating], chloroplastic OS=Arabidopsis thaliana OX=3702 GN=QPT PE=2 SV=2; tr|A0A2P6R392|A0A2P6R392_ROSCH Putative nic…	Aldolase_TIM; catalytic activity; FAMILY NOT NAMED; FvH4_4g32330.t1_v4.0.a2; NAD biosynthesis from 2-amino-3-carboxymuconate semialdehyde; NAD biosynthetic process; NadC; NadC/ModD; Nicotinate and nicotinamide metabolism; Nicotinate metabolism; nicotinate-nucleotide diphosphorylase (carboxylating) activity; NICOTINATE-NUCLEOTIDE PYROPHOSPHORYLASE [CARBOXYLATING]; Nicotinate_pribotase-like_C; Nico…	catalytic activity; NAD biosynthetic process; nicotinate-nucleotide diphosphorylase (carboxylating) activity; pentosyltransferase activity; pyridine nucleotide biosynthetic process	GO:0003824; GO:0004514; GO:0009435; GO:0016763; GO:0019363
TE_homo_80341	-2.27503	0.0434892	Fvb4:31038688-31039074	Fvb4	31037250	31038172	FvH4_4g32331	+	516	Downstream TTS	6.09838	0.170617	AT2G01379.1 | transmembrane protein | Chr2:171098-171343 FORWARD LENGTH=81 | 201606; hypothetical protein RchiOBHm_Chr4g0441131 [Rosa chinensis]; tr|A0A2P6R3C0|A0A2P6R3C0_ROSCH Uncharacterized protein OS=Rosa chinensis OX=74649 GN=RchiOBHm_Chr4g0441131 PE=4 SV=1	disorder_prediction; FvH4_4g32331.t1_v4.0.a2	NA	NA
TE_homo_131733	-2.27288	0.0147828	Fvb7:15541392-15541751	Fvb7	15538002	15540856	FvH4_7g18710	+	536	Downstream TTS	0.399918	0.350449	AT3G10405.1 | vacuolar acid trehalase | Chr3:3233978-3235118 REVERSE LENGTH=212 | 201606; PREDICTED: uncharacterized protein LOC101312783 [Fragaria vesca subsp. vesca]; tr|A0A2P6SJ73|A0A2P6SJ73_ROSCH Uncharacterized protein OS=Rosa chinensis OX=74649 GN=RchiOBHm_Chr1g0362491 PE=4 SV=1	DUF3783; FAMILY NOT NAMED; FvH4_7g18710.t1_v4.0.a2; UCP014543	NA	NA
TE_homo_112796	-2.27066	0.0211993	Fvb6:21862592-21863021	Fvb6	21863958	21867702	FvH4_6g28380	+	938	Upstream TSS	3.73749	0.102556	AT2G24130.2 | Leucine-rich receptor-like protein kinase family protein | Chr2:10258148-10261220 FORWARD LENGTH=995 | 201606; PREDICTED: putative leucine-rich repeat receptor-like serine/threonine-protein kinase At2g24130 [Fragaria vesca subsp. vesca]; sp|Q9ZUI0|Y2241_ARATH Putative leucine-rich repeat receptor-like serine/threonine-protein kinase At2g24130 OS=Arabidopsis thaliana OX=3702 GN=At2g2…	ATP binding; FAMILY NOT NAMED; FvH4_6g28380.t1_v4.0.a2; Kinase-like_dom_sf; L domain-like; Leu-rich_rpt; LRR_8; LRR_dom_sf; LRR_N_plant-typ; LRRNT_2; Pkinase; PROKAR_LIPOPROTEIN; protein binding; protein kinase activity; PROTEIN_KINASE_ATP; Protein_kinase_ATP_BS; PROTEIN_KINASE_DOM; Protein kinase-like (PK-like); PROTEIN_KINASE_ST; protein phosphorylation; Prot_kinase_dom; Ser/Thr_kinase_AS; ; ST…	ATP binding; protein binding; protein kinase activity; protein phosphorylation	GO:0004672; GO:0005515; GO:0005524; GO:0006468
TE_homo_103296	-2.25864	0.0135348	Fvb6:9321494-9321899	Fvb6	9315912	9319682	FvH4_6g15010	-	1812	Upstream TSS	0.0346691	0.954785	AT4G12560.3 | F-box and associated interaction domains-containing protein | Chr4:7441815-7443157 FORWARD LENGTH=413 | 201606; PREDICTED: F-box protein CPR30-like isoform X2 [Fragaria vesca subsp. vesca]; sp|Q9SU30|CPR1_ARATH F-box protein CPR1 OS=Arabidopsis thaliana OX=3702 GN=CPR1 PE=1 SV=2; tr|A0A2P6RAG7|A0A2P6RAG7_ROSCH Putative F-box domain-containing protein OS=Rosa chinensis OX=74649 GN=Rc…	FAMILY NOT NAMED; FvH4_6g15010.t1_v4.0.a2;	NA	NA
TE_homo_103296	-2.25864	0.0135348	Fvb6:9321494-9321899	Fvb6	9322664	9329304	FvH4_6g15020	+	766	Upstream TSS	-0.380712	NA	AT2G37290.3 | Ypt/Rab-GAP domain of gyp1p superfamily protein | Chr2:15656935-15661657 REVERSE LENGTH=882 | 201606; PREDICTED: EVI5-like protein isoform X2 [Fragaria vesca subsp. vesca]; sp|Q3UYK3|TBCD9_MOUSE TBC1 domain family member 9 OS=Mus musculus OX=10090 GN=Tbc1d9 PE=2 SV=2; tr|A0A2P6RAG3|A0A2P6RAG3_ROSCH Putative Rab-GTPase-TBC domain-containing protein OS=Rosa chinensis OX=74649 GN=RchiO…	Coil; disorder_prediction; FvH4_6g15020.t1_v4.0.a2; RabGAP-TBC; Rab-GTPase-TBC_dom; Rab-GTPase_TBC_sf; TBC1 DOMAIN FAMILY MEMBER GTPASE-ACTIVATING PROTEIN; TBC_RABGAP; Ypt/Rab-GAP domain of gyp1p; YPT/RAB-GAP DOMAIN OF GYP1P SUPERFAMILY PROTEIN	NA	NA
TE_struc_1778	-2.23072	0.0172093	Fvb4:25434728-25434893	Fvb4	25432473	25433391	FvH4_4g22692	-	1337	Upstream TSS	NA	NA	NA	FvH4_4g22692.t1_v4.0.a2	NA	NA
TE_struc_1778	-2.23072	0.0172093	Fvb4:25434728-25434893	Fvb4	25435075	25441396	FvH4_4g22710	+	183	Upstream TSS	1.46076	0.212394	AT5G13960.1 | histone-lysine N-methyltransferase%2C H3 lysine-9 specific SUVH4-like protein | Chr5:4501688-4505979 FORWARD LENGTH=624 | 201606; PREDICTED: histone-lysine N-methyltransferase, H3 lysine-9 specific SUVH4-like [Fragaria vesca subsp. vesca]; sp|Q8GZB6|SUVH4_ARATH Histone-lysine N-methyltransferase, H3 lysine-9 specific SUVH4 OS=Arabidopsis thaliana OX=3702 GN=SUVH4 PE=1 SV=2; tr|A0A2P…	FAMILY NOT NAMED; FvH4_4g22710.t1_v4.0.a2; Hist-Lys_N-MeTrfase_plant; histone lysine methylation; histone-lysine N-methyltransferase activity; histone methylation; Lysine degradation; nucleus; PKMTs methylate histone lysines; POST_SET; Post-SET_dom; Pre-SET; PRE_SET; Pre-SET_dom; protein binding; PUA domain-like; PUA-like_sf; SAD_SRA; SAM_MT43_SUVAR39_2; SET; SET_dom; SET domain; ; SRA_YDG; SRA-Y…	nucleus; obsolete histone lysine methylation; obsolete histone lysine N-methyltransferase activity; obsolete histone methylation; protein binding; zinc ion binding	GO:0005515; GO:0005634; GO:0008270; GO:0016571; GO:0018024; GO:0034968
TE_homo_80741	-2.16205	0.0180954	Fvb4:32075939-32076304	Fvb4	32079109	32083368	FvH4_4g34120	+	2806	Upstream TSS	0.637238	0.217822	AT1G60590.1 | Pectin lyase-like superfamily protein | Chr1:22314426-22316867 REVERSE LENGTH=540 | 201606; PREDICTED: polygalacturonase At1g48100 [Fragaria vesca subsp. vesca]; sp|Q949Z1|PGLR4_ARATH Polygalacturonase At1g48100 OS=Arabidopsis thaliana OX=3702 GN=At1g48100 PE=2 SV=1; tr|A0A2P6R3X2|A0A2P6R3X2_ROSCH Putative polygalacturonase OS=Rosa chinensis OX=74649 GN=RchiOBHm_Chr4g0443631 PE=3 SV…	carbohydrate metabolic process; disorder_prediction; FAMILY NOT NAMED; FvH4_4g34120.t1_v4.0.a2; Glyco_hydro_28; Pectin_lyase_fold/virulence; Pectin lyase-like; PECTIN LYASE-LIKE SUPERFAMILY PROTEIN; POLYGALACTURONASE; polygalacturonase activity	carbohydrate metabolic process; polygalacturonase activity	GO:0004650; GO:0005975
TE_homo_120946	-2.16017	0.0312121	Fvb6:35425717-35426074	Fvb6	35419435	35423745	FvH4_6g46420	-	1972	Upstream TSS	-10.0224	2.75031e-10	AT3G02310.1 | K-box region and MADS-box transcription factor family protein | Chr3:464554-466687 REVERSE LENGTH=250 | 201606; PREDICTED: developmental protein SEPALLATA 1 [Fragaria vesca subsp. vesca] &gt;gi|28628841|gb|AAO49380.1| MADS-RIN-like protein [Fragaria x ananassa]; sp|P29384|SEP2_ARATH Developmental protein SEPALLATA 2 OS=Arabidopsis thaliana OX=3702 GN=SEP2 PE=1 SV=1; tr|Q84U54|Q84U54…	Coil; DNA binding; DNA-binding transcription factor activity; FvH4_6g46420.t1_v4.0.a2; K-box; K_BOX; MADS_BOX_1; MADS_BOX_2; MADS BOX PROTEIN; MADSDOMAIN; MADS_MEF2-like; MADS_MEF2_like; Myogenesis; nucleus; positive regulation of transcription by RNA polymerase II; protein dimerization activity; regulation of transcription, DNA-templated; RNA polymerase II regulatory region sequence-specific DNA…	DNA binding; DNA-binding transcription factor activity; nucleus; positive regulation of transcription by RNA polymerase II; protein dimerization activity; regulation of DNA-templated transcription; RNA polymerase II transcription regulatory region sequence-specific DNA binding	GO:0000977; GO:0003677; GO:0003700; GO:0005634; GO:0006355; GO:0045944; GO:0046983
TE_homo_120946	-2.16017	0.0312121	Fvb6:35425717-35426074	Fvb6	35426762	35427872	FvH4_6g46421	-	689	Downstream TTS	NA	NA	PREDICTED: uncharacterized protein LOC105351802 [Fragaria vesca subsp. vesca]	FvH4_6g46421.t1_v4.0.a2	NA	NA
TE_homo_120946	-2.16017	0.0312121	Fvb6:35425717-35426074	Fvb6	35428458	35430517	FvH4_6g46430	-	2385	Downstream TTS	0.491983	0.551722	AT5G15802.1 | chaperone | Chr5:5156578-5157520 REVERSE LENGTH=99 | 201606; PREDICTED: uncharacterized protein LOC101312174 isoform X2 [Fragaria vesca subsp. vesca]; tr|A0A2P6S3Q3|A0A2P6S3Q3_ROSCH Uncharacterized protein OS=Rosa chinensis OX=74649 GN=RchiOBHm_Chr2g0164961 PE=4 SV=1	CHAPERONE; FAMILY NOT NAMED; FvH4_6g46430.t1_v4.0.a2; FvH4_6g46430.t3_v4.0.a2	NA	NA
TE_homo_129883	-2.14695	0.0139872	Fvb7:12151600-12151753	Fvb7	12146934	12150325	FvH4_7g13570	-	1275	Upstream TSS	2.75492	0.492986	AT3G05660.1 | receptor like protein 33 | Chr3:1649258-1652001 REVERSE LENGTH=875 | 201606; PREDICTED: receptor-like protein 12 [Fragaria vesca subsp. vesca]; sp|F4J8G2|RLP33_ARATH Receptor-like protein 33 OS=Arabidopsis thaliana OX=3702 GN=RLP33 PE=3 SV=1; tr|A0A2P6SGR9|A0A2P6SGR9_ROSCH Putative leucine-rich repeat-containing, plant-type, leucine-rich repeat domain, L OS=Rosa chinensis OX=74649 G…	FAMILY NOT NAMED; FvH4_7g13570.t1_v4.0.a2; L domain-like; Leu-rich_rpt; LEURICHRPT; LRR_8; LRR_dom_sf; LRR_N_plant-typ; LRRNT_2; protein binding; RNI-like;	protein binding	GO:0005515
TE_homo_132482	-2.12392	0.00491948	Fvb7:17389235-17389633	Fvb7	17386896	17388118	FvH4_7g21860	+	1117	Downstream TTS	NA	NA	NA	Coil; disorder_prediction; FvH4_7g21860.t1_v4.0.a2	NA	NA
TE_homo_5343	-2.1068	0.0135458	Fvb1:12094839-12095015	Fvb1	12095396	12098436	FvH4_1g19970	+	382	Upstream TSS	-0.115892	0.848765	AT2G22490.1 | Cyclin D2%3B1 | Chr2:9554157-9555873 REVERSE LENGTH=361 | 201606; PREDICTED: cyclin-D2-1 [Fragaria vesca subsp. vesca]; sp|P42752|CCD21_ARATH Cyclin-D2-1 OS=Arabidopsis thaliana OX=3702 GN=CYCD2-1 PE=1 SV=3; tr|A0A2P6RQ27|A0A2P6RQ27_ROSCH Putative cyclin OS=Rosa chinensis OX=74649 GN=RchiOBHm_Chr2g0111911 PE=3 SV=1	Cyclin; CYCLIN; Cyclin_A_B_D_E; Cyclin_C; Cyclin_C-dom; CYCLIN-D2-1; CYCLINE; Cyclin-like; Cyclin-like_sf; Cyclin_N; FvH4_1g19970.t1_v4.0.a2; nucleus	nucleus	GO:0005634
TE_homo_123439	-2.05011	0.0480978	Fvb7:1766165-1766409	Fvb7	1767198	1767756	FvH4_7g01350	+	790	Upstream TSS	NA	NA	AT2G43000.1 | NAC domain containing protein 42 | Chr2:17880617-17882584 REVERSE LENGTH=275 | 201606; sp|Q9SK55|NAC42_ARATH Transcription factor JUNGBRUNNEN 1 OS=Arabidopsis thaliana OX=3702 GN=JUB1 PE=1 SV=1; tr|A0A314Z824|A0A314Z824_PRUYE Transcription factor JUNGBRUNNEN 1-like OS=Prunus yedoensis var. nudiflora OX=2094558 GN=Pyn_01684 PE=4 SV=1; transcription factor JUNGBRUNNEN 1-like [Rosa chi…	DNA binding; FAMILY NOT NAMED; FvH4_7g01350.t1_v4.0.a2; NAC_dom_sf; regulation of transcription, DNA-templated;	DNA binding; regulation of DNA-templated transcription	GO:0003677; GO:0006355
TE_homo_41101	-1.98205	0.0361902	Fvb3:16490079-16490371	Fvb3	16484001	16489567	FvH4_3g23480	+	512	Downstream TTS	-0.114122	0.550705	AT3G20290.3 | EPS15 homology domain 1 | Chr3:7075057-7078655 REVERSE LENGTH=545 | 201606; PREDICTED: EH domain-containing protein 1 isoform X2 [Fragaria vesca subsp. vesca]; sp|Q94CF0|EHD1_ARATH EH domain-containing protein 1 OS=Arabidopsis thaliana OX=3702 GN=EHD1 PE=1 SV=1; tr|A0A2P6QCS4|A0A2P6QCS4_ROSCH Putative EH domain-containing protein OS=Rosa chinensis OX=74649 GN=RchiOBHm_Chr5g0041321 P…	calcium ion binding; Coil; DUF5600; Dynamin_N; Dynamin_SF; EF-hand; EF_HAND_2; EF-hand_4; EF_hand_dom; EF-hand-dom_pair; EH; EHD; EHD_N; EH_dom; EH DOMAIN; FvH4_3g23480.t1_v4.0.a2; G_DYNAMIN_2; G_DYNAMIN_dom; GTP binding; P-loop containing nucleoside triphosphate hydrolases; P-loop_NTPase; protein binding;	calcium ion binding; GTP binding; protein binding	GO:0005509; GO:0005515; GO:0005525
TE_homo_101016	-1.92612	0.029158	Fvb6:5281376-5281782	Fvb6	5280379	5281371	FvH4_6g08900	+	5	Downstream TTS	0	1	hypothetical protein RchiOBHm_Chr3g0459191 [Rosa chinensis]; tr|A0A2P6R817|A0A2P6R817_ROSCH Uncharacterized protein OS=Rosa chinensis OX=74649 GN=RchiOBHm_Chr3g0459191 PE=4 SV=1	FvH4_6g08900.t1_v4.0.a2	NA	NA
TE_homo_32621	-1.82242	0.00667104	Fvb3:2334874-2335006	Fvb3	2337236	2339099	FvH4_3g04180	-	2231	Downstream TTS	NA	NA	AT4G37770.1 | 1-amino-cyclopropane-1-carboxylate synthase 8 | Chr4:17752222-17753925 FORWARD LENGTH=469 | 201606; PREDICTED: 1-aminocyclopropane-1-carboxylate synthase 8-like [Fragaria vesca subsp. vesca]; sp|Q9T065|1A18_ARATH 1-aminocyclopropane-1-carboxylate synthase 8 OS=Arabidopsis thaliana OX=3702 GN=ACS8 PE=1 SV=1; tr|A0A2P6Q142|A0A2P6Q142_ROSCH Putative 1-aminocyclopropane-1-carboxylate sy…	AAT_like; AA_TRANSFER_CLASS_1; ACCSYNTHASE; Aminotran_1_2; Aminotransferase_I/II; biosynthetic process; catalytic activity; FAMILY NOT NAMED; FvH4_3g04180.t1_v4.0.a2; NHTrfase_class1_PyrdxlP-BS; PLP-dependent transferases; PyrdxlP-dep_Trfase; PyrdxlP-dep_Trfase_dom1; PyrdxlP-dep_Trfase_major; pyridoxal phosphate binding;	biosynthetic process; catalytic activity; pyridoxal phosphate binding	GO:0003824; GO:0009058; GO:0030170
TE_homo_78752	-1.75764	0.0399856	Fvb4:27320163-27320457	Fvb4	27323360	27325749	FvH4_4g25610	-	2904	Downstream TTS	-0.449267	0.732102	AT1G59960.1 | NAD(P)-linked oxidoreductase superfamily protein | Chr1:22071410-22073067 REVERSE LENGTH=326 | 201606; PREDICTED: non-functional NADPH-dependent codeinone reductase 2-like [Fragaria vesca subsp. vesca]; sp|Q9SQ64|COR2_PAPSO Non-functional NADPH-dependent codeinone reductase 2 OS=Papaver somniferum OX=3469 GN=COR2 PE=1 SV=1; tr|Q5Y381|Q5Y381_FRAAN Aldo/keto reductase OS=Fragaria anan…	AKR; ALDKETRDTASE; Aldo/keto_reductase; ALDO/KETO REDUCTASE; ALDOKETO_REDUCTASE_2; Aldo_ket_red; Aldo/ket_reductase_CS; FvH4_4g25610.t1_v4.0.a2; FvH4_4g25610.t2_v4.0.a2; NAD(P)-linked oxidoreductase; NADP_OxRdtase_dom; NADP_OxRdtase_dom_sf; oxidation-reduction process; oxidoreductase activity;	obsolete oxidation-reduction process; oxidoreductase activity	GO:0016491; GO:0055114
TE_homo_28515	-1.74039	0.0174822	Fvb2:20222668-20223088	Fvb2	20220481	20222070	FvH4_2g24850	-	598	Upstream TSS	-0.79529	0.374288	AT4G03180.1 | rRNA-processing protein | Chr4:1403289-1404663 FORWARD LENGTH=185 | 201606; PREDICTED: rRNA-processing protein FYV7 [Fragaria vesca subsp. vesca]; tr|A0A2P6PWH8|A0A2P6PWH8_ROSCH Uncharacterized protein OS=Rosa chinensis OX=74649 GN=RchiOBHm_Chr6g0292701 PE=4 SV=1	Coil; disorder_prediction; FvH4_2g24850.t1_v4.0.a2; Fyv7/TAP26; rRNA_processing; Surfactant metabolism; UNCHARACTERIZED	NA	NA
TE_homo_28515	-1.74039	0.0174822	Fvb2:20222668-20223088	Fvb2	20223629	20225985	FvH4_2g24860	+	542	Upstream TSS	-2.83044	0.00151099	AT5G01960.1 | RING/U-box superfamily protein | Chr5:370811-372775 FORWARD LENGTH=426 | 201606; PREDICTED: uncharacterized protein LOC105353484 [Fragaria vesca subsp. vesca]; tr|A0A2P6SLU7|A0A2P6SLU7_ROSCH Putative transcription factor C2H2 family OS=Rosa chinensis OX=74649 GN=RchiOBHm_Chr1g0372711 PE=4 SV=1	FvH4_2g24860.t1_v4.0.a2; RING/U-BOX SUPERFAMILY PROTEIN; UNCHARACTERIZED RING FINGER-CONTAINING PROTEIN	NA	NA
TE_homo_125852	-1.70189	0.0467622	Fvb7:5136605-5136973	Fvb7	5134764	5135889	FvH4_7g04610	-	716	Upstream TSS	-0.194055	0.684771	putative kelch-type beta propeller [Rosa chinensis]; tr|A0A2P6QUH2|A0A2P6QUH2_ROSCH Putative kelch-type beta propeller OS=Rosa chinensis OX=74649 GN=RchiOBHm_Chr4g0406891 PE=4 SV=1	DUF1668; DUF1668_ORYSA; FvH4_7g04610.t1_v4.0.a2; Kelch motif; Kelch-typ_b-propeller; protein binding	protein binding	GO:0005515
TE_homo_125852	-1.70189	0.0467622	Fvb7:5136605-5136973	Fvb7	5137468	5144598	FvH4_7g04620	+	496	Upstream TSS	1.04283	0.000358688	AT3G54360.2 | zinc ion binding protein | Chr3:20128570-20131581 REVERSE LENGTH=405 | 201606; PREDICTED: uncharacterized protein LOC101299030 [Fragaria vesca subsp. vesca]; sp|Q9M2V1|NCA1_ARATH Protein NCA1 OS=Arabidopsis thaliana OX=3702 GN=NCA1 PE=1 SV=1; tr|A0A2P6SB88|A0A2P6SB88_ROSCH Putative transcription factor C2H2 family OS=Rosa chinensis OX=74649 GN=RchiOBHm_Chr1g0330051 PE=4 SV=1	EARLY GIRL, ISOFORM A; FvH4_7g04620.t1_v4.0.a2; protein binding; RING FINGER PROTEIN 41, 151; RING/U-box; TPR_12; TPR-like; TPR-like_helical_dom_sf; zf-C3HC4_3; ZF_RING_1; ZF_RING_2; Znf_RING; Znf_RING_CS; Znf_RING/FYVE/PHD	protein binding	GO:0005515
TE_homo_129997	-1.69608	0.0477761	Fvb7:12400529-12400949	Fvb7	12401265	12401826	FvH4_7g13921	+	317	Upstream TSS	0	1	putative ripening-related protein 1 [Rosa chinensis] &gt;gi|1358183540|gb|PRQ58014.1| putative rlpA-like protein, double-psi beta-barrel [Rosa chinensis]; sp|Q6H5X0|RIP2_ORYSJ Putative ripening-related protein 2 OS=Oryza sativa subsp. japonica OX=39947 GN=Os02g0637000 PE=3 SV=1; tr|A0A2P6SH49|A0A2P6SH49_ROSCH Putative rlpA-like protein, double-psi beta-barrel OS=Rosa chinensis OX=74649 GN=RchiOBH…	Barwin-like endoglucanases; FAMILY NOT NAMED; FvH4_7g13921.t1_v4.0.a2; Kiwellin-like; RlpA-like_sf;	NA	NA
TE_homo_129997	-1.69608	0.0477761	Fvb7:12400529-12400949	Fvb7	12402973	12403441	FvH4_7g13930	-	2025	Downstream TTS	NA	NA	PREDICTED: putative ripening-related protein 1 [Fragaria vesca subsp. vesca]; sp|Q6H5X0|RIP2_ORYSJ Putative ripening-related protein 2 OS=Oryza sativa subsp. japonica OX=39947 GN=Os02g0637000 PE=3 SV=1; tr|A0A2P6SI49|A0A2P6SI49_ROSCH Putative rlpA-like protein, double-psi beta-barrel OS=Rosa chinensis OX=74649 GN=RchiOBHm_Chr1g0358341 PE=4 SV=1	Barwin-like endoglucanases; FAMILY NOT NAMED; FvH4_7g13930.t1_v4.0.a2; Kiwellin-like; RlpA-like_sf;	NA	NA
TE_homo_75529	-1.69607	0.0239674	Fvb4:21750579-21751044	Fvb4	21751768	21753523	FvH4_4g17751	+	725	Upstream TSS	0.476548	0.547123	NA	FvH4_4g17751.t1_v4.0.a2	NA	NA
TE_homo_71203	-1.6376	0.0162217	Fvb4:16062358-16062511	Fvb4	16052393	16062266	FvH4_4g12370	-	92	Upstream TSS	1.95171	2.4086e-05	AT1G48360.2 | zinc ion binding/nucleic acid binding/hydrolase | Chr1:17868661-17872946 FORWARD LENGTH=891 | 201606; PREDICTED: fanconi-associated nuclease 1 homolog [Fragaria vesca subsp. vesca]; sp|Q5XVJ4|FAN1_ARATH Fanconi-associated nuclease 1 homolog OS=Arabidopsis thaliana OX=3702 GN=FAN1 PE=2 SV=2; tr|A0A2P6QVG6|A0A2P6QVG6_ROSCH Fanconi-associated nuclease OS=Rosa chinensis OX=74649 GN=Rchi…	E3 ubiquitin ligases ubiquitinate target proteins; FAMILY NOT NAMED; Fan1-like; Fanconi Anemia Pathway; FvH4_4g12370.t1_v4.0.a2; FvH4_4g12370.t2_v4.0.a2; HIRAN; hydrolase activity, acting on acid anhydrides, in phosphorus-containing anhydrides; hydrolase activity, acting on ester bonds; interstrand cross-link repair; nuclease activity; nucleic acid binding; tRNA_endonuc-like_dom_sf; VRR_NUC; zinc…	hydrolase activity, acting on acid anhydrides, in phosphorus-containing anhydrides; hydrolase activity, acting on ester bonds; nuclease activity; nucleic acid binding; zinc ion binding	GO:0003676; GO:0004518; GO:0008270; GO:0016788; GO:0016818
TE_homo_33363	-1.53508	0.0294301	Fvb3:3882326-3882513	Fvb3	3883157	3888305	FvH4_3g06740	-	645	Downstream TTS	1.5828	2.33634e-09	AT4G18950.1 | Integrin-linked protein kinase family | Chr4:10375685-10378129 FORWARD LENGTH=459 | 201606; PREDICTED: serine/threonine-protein kinase HT1 [Fragaria vesca subsp. vesca]; sp|F4IS56|ILK1_ARATH Integrin-linked protein kinase 1 OS=Arabidopsis thaliana OX=3702 GN=ILK1 PE=1 SV=1; tr|A0A2P6Q555|A0A2P6Q555_ROSCH Uncharacterized protein OS=Rosa chinensis OX=74649 GN=RchiOBHm_Chr5g0012421 PE=…	ANK; Ank_2; ANK_REPEAT; ANK_REP_REGION; Ankyrin repeat; Ankyrin_rpt; Ankyrin_rpt-contain_dom; Ankyrin_rpt-contain_sf; ATP binding; Coil; FAMILY NOT NAMED; FvH4_3g06740.t1_v4.0.a2; ILK; Kinase-like_dom_sf; Pkinase_Tyr; protein binding; protein kinase activity; PROTEIN_KINASE_DOM; Protein kinase-like (PK-like); protein phosphorylation; Prot_kinase_dom; Ser-Thr/Tyr_kinase_cat_dom; ; STKc_MAP3K-like	ATP binding; protein binding; protein kinase activity; protein phosphorylation	GO:0004672; GO:0005515; GO:0005524; GO:0006468
TE_homo_10957	-1.49707	0.0216128	Fvb1:20068954-20069373	Fvb1	20065271	20066268	FvH4_1g28230	-	2686	Upstream TSS	0.775569	0.199167	AT5G18130.1 | transmembrane protein | Chr5:5995634-5997165 FORWARD LENGTH=280 | 201606; PREDICTED: uncharacterized protein LOC101313552 [Fragaria vesca subsp. vesca]; tr|A0A2P6RHM2|A0A2P6RHM2_ROSCH Uncharacterized protein OS=Rosa chinensis OX=74649 GN=RchiOBHm_Chr3g0497011 PE=4 SV=1	disorder_prediction; F20H23.8 PROTEIN; FAMILY NOT NAMED; FvH4_1g28230.t1_v4.0.a2	NA	NA
TE_homo_10957	-1.49707	0.0216128	Fvb1:20068954-20069373	Fvb1	20069624	20077317	FvH4_1g28240	-	252	Downstream TTS	-0.700442	0.185431	AT3G03860.1 | APR-like 5 | Chr3:992465-994315 FORWARD LENGTH=300 | 201606; PREDICTED: 5'-adenylylsulfate reductase-like 5, partial [Fragaria vesca subsp. vesca]; sp|Q93YX4|APRL5_ARATH 5'-adenylylsulfate reductase-like 5 OS=Arabidopsis thaliana OX=3702 GN=APRL5 PE=2 SV=1; tr|A0A2P6RHM1|A0A2P6RHM1_ROSCH Putative thioredoxin-like protein OS=Rosa chinensis OX=74649 GN=RchiOBHm_Chr3g0496981 PE=4 SV=1	5'-ADENYLYLSULFATE REDUCTASE-LIKE 7; cell redox homeostasis; FAMILY NOT NAMED; FvH4_1g28240.t1_v4.0.a2; Thioredoxin; THIOREDOXIN_2; Thioredoxin_domain; Thioredoxin-like; Thioredoxin-like_sf	cell redox homeostasis	GO:0045454
TE_homo_99755	-1.45749	0.032493	Fvb6:2718387-2718680	Fvb6	2719973	2720453	FvH4_6g04910	+	1294	Upstream TSS	-1.88802	0.000835013	AT5G21482.1 | cytokinin oxidase 7 | Chr5:7226842-7230052 FORWARD LENGTH=524 | 201606; PREDICTED: cytokinin dehydrogenase 7-like [Fragaria vesca subsp. vesca]; sp|Q9FUJ1|CKX7_ARATH Cytokinin dehydrogenase 7 OS=Arabidopsis thaliana OX=3702 GN=CKX7 PE=1 SV=1; tr|A0A2P6Q1H6|A0A2P6Q1H6_ROSCH Putative cytokinin dehydrogenase OS=Rosa chinensis OX=74649 GN=RchiOBHm_Chr6g0311781 PE=4 SV=1	Cytok_DH_C_sf; Cytokin-bind; CYTOKININ DEHYDROGENASE 7; cytokinin dehydrogenase activity; Cytokinin_DH_FAD/cytokin-bd; cytokinin metabolic process; FAD-bd_PCMH_sub2; flavin adenine dinucleotide binding; FvH4_6g04910.t1_v4.0.a2; GULONOLACTONE OXIDASE; oxidation-reduction process; Zeatin biosynthesis	cytokinin dehydrogenase activity; cytokinin metabolic process; flavin adenine dinucleotide binding; obsolete oxidation-reduction process	GO:0009690; GO:0019139; GO:0050660; GO:0055114
TE_homo_99755	-1.45749	0.032493	Fvb6:2718387-2718680	Fvb6	2716538	2718188	FvH4_6g04900	+	199	Downstream TTS	-4.75369	2.21349e-08	AT5G21482.1 | cytokinin oxidase 7 | Chr5:7226842-7230052 FORWARD LENGTH=524 | 201606; PREDICTED: cytokinin dehydrogenase 7-like [Fragaria vesca subsp. vesca]; sp|Q9FUJ1|CKX7_ARATH Cytokinin dehydrogenase 7 OS=Arabidopsis thaliana OX=3702 GN=CKX7 PE=1 SV=1; tr|A0A2P6Q1H6|A0A2P6Q1H6_ROSCH Putative cytokinin dehydrogenase OS=Rosa chinensis OX=74649 GN=RchiOBHm_Chr6g0311781 PE=4 SV=1	Cytok_DH_C_sf; Cytokin-bind; CYTOKININ DEHYDROGENASE 7; cytokinin dehydrogenase activity; Cytokinin_DH_FAD/cytokin-bd; cytokinin metabolic process; flavin adenine dinucleotide binding; FvH4_6g04900.t1_v4.0.a2; GULONOLACTONE OXIDASE; oxidation-reduction process; Zeatin biosynthesis	cytokinin dehydrogenase activity; cytokinin metabolic process; flavin adenine dinucleotide binding; obsolete oxidation-reduction process	GO:0009690; GO:0019139; GO:0050660; GO:0055114
TE_homo_99755	-1.45749	0.032493	Fvb6:2718387-2718680	Fvb6	2718834	2725473	FvH4_6g04920	-	155	Downstream TTS	-0.576425	0.0477074	AT3G04970.1 | DHHC-type zinc finger family protein | Chr3:1376240-1378339 FORWARD LENGTH=397 | 201606; PREDICTED: probable protein S-acyltransferase 17 [Fragaria vesca subsp. vesca]; sp|Q3EBC2|ZDHC5_ARATH Probable protein S-acyltransferase 17 OS=Arabidopsis thaliana OX=3702 GN=PAT17 PE=2 SV=1; tr|A0A2P6R6K3|A0A2P6R6K3_ROSCH S-acyltransferase OS=Rosa chinensis OX=74649 GN=RchiOBHm_Chr3g0453421 PE=…	DHHC; FvH4_6g04920.t1_v4.0.a2; FvH4_6g04920.t6_v4.0.a2; PALMITOYLTRANSFERASE; Palmitoyltrfase_DHHC; ZINC FINGER DHHC DOMAIN CONTAINING PROTEIN	NA	NA
TE_homo_23082	1.65918	0.0433955	Fvb2:11770053-11770330	Fvb2	11768897	11769825	FvH4_2g13461	-	228	Upstream TSS	NA	NA	hypothetical protein RchiOBHm_Chr3g0492121 [Rosa chinensis]; tr|A0A2P6RGE5|A0A2P6RGE5_ROSCH Uncharacterized protein OS=Rosa chinensis OX=74649 GN=RchiOBHm_Chr3g0492121 PE=4 SV=1	FvH4_2g13461.t1_v4.0.a2	NA	NA
TE_homo_30262	1.70308	0.000905427	Fvb2:24812928-24813134	Fvb2	24813558	24819095	FvH4_2g32880	+	425	Upstream TSS	-0.50214	0.0783103	AT4G07410.1 | Transducin family protein / WD-40 repeat family protein | Chr4:4201465-4205136 REVERSE LENGTH=815 | 201606; PREDICTED: U3 small nucleolar RNA-associated protein 4 [Fragaria vesca subsp. vesca]; sp|Q8RXU6|PCN_ARATH WD repeat-containing protein PCN OS=Arabidopsis thaliana OX=3702 GN=PCN PE=2 SV=1; tr|A0A2P6Q0Z7|A0A2P6Q0Z7_ROSCH Putative transcription factor WD40-like family OS=Rosa ch…	disorder_prediction; FAMILY NOT NAMED; FvH4_2g32880.t1_v4.0.a2; protein binding; WD40; WD40_repeat; WD40_repeat_CS; WD40_repeat_dom; WD40_repeat_dom_sf; WD40 repeat-like; WD40/YVTN_repeat-like_dom_sf; WD_REPEATS_1; WD_REPEATS_2; WD_REPEATS_REGION	protein binding	GO:0005515
TE_homo_34044	1.75709	0.02792	Fvb3:5295624-5295791	Fvb3	5298670	5302422	FvH4_3g09060	-	2880	Downstream TTS	2.05797	1.47939e-10	AT5G58950.1 | Protein kinase superfamily protein | Chr5:23801136-23803025 REVERSE LENGTH=525 | 201606; PREDICTED: serine/threonine-protein kinase HT1 [Fragaria vesca subsp. vesca]; sp|Q2MHE4|HT1_ARATH Serine/threonine-protein kinase HT1 OS=Arabidopsis thaliana OX=3702 GN=HT1 PE=1 SV=1; tr|A0A2P6Q439|A0A2P6Q439_ROSCH Uncharacterized protein OS=Rosa chinensis OX=74649 GN=RchiOBHm_Chr5g0008571 PE=4 …	ATP binding; disorder_prediction; FAMILY NOT NAMED; FvH4_3g09060.t1_v4.0.a2; FvH4_3g09060.t2_v4.0.a2; FvH4_3g09060.t3_v4.0.a2; Kinase-like_dom_sf; Pkinase_Tyr; protein kinase activity; PROTEIN_KINASE_DOM; Protein kinase-like (PK-like); PROTEIN_KINASE_ST; protein phosphorylation; Prot_kinase_dom; Ser/Thr_kinase_AS; Ser-Thr/Tyr_kinase_cat_dom; ; STKc_MAP3K-like; TYRKINASE	ATP binding; protein kinase activity; protein phosphorylation	GO:0004672; GO:0005524; GO:0006468
TE_homo_31836	1.89887	0.0242388	Fvb3:582417-582607	Fvb3	578112	579454	FvH4_3g01180	-	2963	Upstream TSS	NA	NA	AT3G25070.2 | RPM1 interacting protein 4 | Chr3:9132891-9133747 FORWARD LENGTH=224 | 201606; PREDICTED: RPM1-interacting protein 4-like [Fragaria vesca subsp. vesca]; sp|Q8GYN5|RIN4_ARATH RPM1-interacting protein 4 OS=Arabidopsis thaliana OX=3702 GN=RIN4 PE=1 SV=1; tr|A0A068UA22|A0A068UA22_COFCA Uncharacterized protein OS=Coffea canephora OX=49390 GN=GSCOC_T00017865001 PE=4 SV=1	AvrRpt-cleavage; disorder_prediction; FAMILY NOT NAMED; FvH4_3g01180.t1_v4.0.a2; RIN4/NOI4; ; TypeIII_avirulence_cleave	NA	NA
TE_homo_31836	1.89887	0.0242388	Fvb3:582417-582607	Fvb3	583049	583881	FvH4_3g01190	+	443	Upstream TSS	-1.64566	0.543822	AT2G18370.1 | Bifunctional inhibitor/lipid-transfer protein/seed storage 2S albumin superfamily protein | Chr2:7980687-7981475 FORWARD LENGTH=116 | 201606; PREDICTED: non-specific lipid-transfer protein 1-like [Fragaria vesca subsp. vesca]; sp|Q0IQK9|NLTP1_ORYSJ Non-specific lipid-transfer protein 1 OS=Oryza sativa subsp. japonica OX=39947 GN=LTP PE=1 SV=1; tr|A0A2P6QEB2|A0A2P6QEB2_ROSCH Putative…	Bifunc_inhib/LTP/seed_store; Bifunctional inhibitor/lipid-transfer protein/seed storage 2S albumin; Bifun_inhib/LTP/seed_sf; FAMILY NOT NAMED; FvH4_3g01190.t1_v4.0.a2; lipid binding; lipid transport; LIPIDTRNSFER; LTP_2; NON-SPECIFIC LIPID-TRANSFER PROTEIN 15-RELATED; nsLTP1; Plant_LTP; PLANT_LTP	lipid binding; lipid transport	GO:0006869; GO:0008289
TE_homo_31836	1.89887	0.0242388	Fvb3:582417-582607	Fvb3	585319	586022	FvH4_3g01200	+	2713	Upstream TSS	0.126746	0.987616	AT2G18370.1 | Bifunctional inhibitor/lipid-transfer protein/seed storage 2S albumin superfamily protein | Chr2:7980687-7981475 FORWARD LENGTH=116 | 201606; PREDICTED: non-specific lipid-transfer protein-like [Fragaria vesca subsp. vesca]; sp|Q9ZPW9|NLTP8_ARATH Non-specific lipid-transfer protein 8 OS=Arabidopsis thaliana OX=3702 GN=LTP8 PE=3 SV=1; tr|A0A2P6Q2B9|A0A2P6Q2B9_ROSCH Non-specific lipid…	Bifunc_inhib/LTP/seed_store; Bifunctional inhibitor/lipid-transfer protein/seed storage 2S albumin; Bifun_inhib/LTP/seed_sf; FAMILY NOT NAMED; FvH4_3g01200.t1_v4.0.a2; lipid binding; lipid transport; LIPIDTRNSFER; NON-SPECIFIC LIPID-TRANSFER PROTEIN 15-RELATED; nsLTP1; Plant_LTP; Tryp_alpha_amyl	lipid binding; lipid transport	GO:0006869; GO:0008289
TE_homo_59471	1.99754	0.0247955	Fvb4:2231268-2231579	Fvb4	2227944	2231192	FvH4_4g02430	+	76	Downstream TTS	10.3807	2.29579e-08	AT3G01680.1 | sieve element occlusion amino-terminus protein | Chr3:252033-255246 FORWARD LENGTH=740 | 201606; PREDICTED: uncharacterized protein LOC101297774 [Fragaria vesca subsp. vesca]; sp|Q9SS87|SEOB_ARATH Protein SIEVE ELEMENT OCCLUSION B OS=Arabidopsis thaliana OX=3702 GN=SEOB PE=1 SV=1; tr|A0A2P6QQ54|A0A2P6QQ54_ROSCH Putative sieve element occlusion OS=Rosa chinensis OX=74649 GN=RchiOBHm_…	FAMILY NOT NAMED; FvH4_4g02430.t1_v4.0.a2; phloem development; SEOA; SEO_C; SEO_N;	phloem development	GO:0010088
TE_homo_59471	1.99754	0.0247955	Fvb4:2231268-2231579	Fvb4	2231643	2238713	FvH4_4g02431	-	65	Downstream TTS	NA	NA	tr|A0A2P6QC43|A0A2P6QC43_ROSCH Putative ribonuclease H-like domain-containing protein OS=Rosa chinensis OX=74649 GN=RchiOBHm_Chr5g0038961 PE=4 SV=1; uncharacterized protein LOC112164413 [Rosa chinensis]	FAMILY NOT NAMED; FvH4_4g02431.t1_v4.0.a2; nucleic acid binding; POLYNUCLEOTIDYL TRANSFERASE, RIBONUCLEASE H-LIKE SUPERFAMILY PROTEIN; RNA-DNA hybrid ribonuclease activity; RNaseH_domain; RNase_H_like; RVT_3	nucleic acid binding; RNA-DNA hybrid ribonuclease activity	GO:0003676; GO:0004523
TE_homo_975	2.01105	0.0442437	Fvb1:2639390-2639520	Fvb1	2635362	2638062	FvH4_1g04940	-	1328	Upstream TSS	-0.733034	0.00153401	AT5G45130.1 | Ras small GTP-binding family protein | Chr5:18244495-18246060 FORWARD LENGTH=200 | 201606; PREDICTED: ras-related protein RHN1-like [Fragaria vesca subsp. vesca]; sp|P31583|RHN1_NICPL Ras-related protein RHN1 OS=Nicotiana plumbaginifolia OX=4092 GN=RHN1 PE=2 SV=1; tr|A0A2P6RJG6|A0A2P6RJG6_ROSCH Putative small GTPase superfamily, P-loop containing nucleoside triphosphate hydrolase OS…	FAMILY NOT NAMED; FvH4_1g04940.t1_v4.0.a2; FvH4_1g04940.t3_v4.0.a2; FvH4_1g04940.t4_v4.0.a2; GTPase activity; GTP binding; P-loop containing nucleoside triphosphate hydrolases; P-loop_NTPase; RAB; Rab5_related; Ras; RASTRNSFRMNG; ; Small_GTPase; Small_GTP-bd_dom; TIGR00231	GTPase activity; GTP binding	GO:0003924; GO:0005525
TE_homo_975	2.01105	0.0442437	Fvb1:2639390-2639520	Fvb1	2640361	2641152	FvH4_1g04950	+	842	Upstream TSS	-1.5648	0.00727938	AT1G67910.2 | hypothetical protein | Chr1:25471534-25471809 REVERSE LENGTH=91 | 201606; hypothetical protein RchiOBHm_Chr2g0090561 [Rosa chinensis]; tr|A0A2P6RJG9|A0A2P6RJG9_ROSCH Uncharacterized protein OS=Rosa chinensis OX=74649 GN=RchiOBHm_Chr2g0090561 PE=4 SV=1	disorder_prediction; FAMILY NOT NAMED; FvH4_1g04950.t1_v4.0.a2;	NA	NA
TE_homo_975	2.01105	0.0442437	Fvb1:2639390-2639520	Fvb1	2641459	2644560	FvH4_1g04960	-	1940	Downstream TTS	0.495305	0.0622869	AT1G72050.3 | transcription factor IIIA | Chr1:27115037-27117228 FORWARD LENGTH=427 | 201606; PREDICTED: transcription factor IIIA-like isoform X1 [Fragaria vesca subsp. vesca]; sp|Q84MZ4|TF3A_ARATH Transcription factor IIIA OS=Arabidopsis thaliana OX=3702 GN=TFIIIA PE=1 SV=1; tr|A0A2P6RJH4|A0A2P6RJH4_ROSCH Putative transcription factor C2H2 family OS=Rosa chinensis OX=74649 GN=RchiOBHm_Chr2g0090…	beta-beta-alpha zinc fingers; disorder_prediction; FAMILY NOT NAMED; FvH4_1g04960.t1_v4.0.a2; nucleic acid binding; zf-C2H2; ZINC_FINGER_C2H2_1; ZINC_FINGER_C2H2_2; ZINC FINGER PROTEIN 423 HOMOLOG; Znf_C2H2_sf; Znf_C2H2_type	nucleic acid binding	GO:0003676
TE_homo_27865	2.10518	0.00667104	Fvb2:18916776-18916920	Fvb2	18918000	18919620	FvH4_2g23070	+	1081	Upstream TSS	-5.44979	2.26635e-08	AT1G03070.3 | Bax inhibitor-1 family protein | Chr1:730148-731379 FORWARD LENGTH=247 | 201606; PREDICTED: BI1-like protein [Fragaria vesca subsp. vesca]; sp|Q9SA63|LFG4_ARATH Protein LIFEGUARD 4 OS=Arabidopsis thaliana OX=3702 GN=LFG4 PE=2 SV=1; tr|A0A2P6PVT2|A0A2P6PVT2_ROSCH Uncharacterized protein OS=Rosa chinensis OX=74649 GN=RchiOBHm_Chr6g0290181 PE=3 SV=1	Bax1-I; Bax_inhibitor_1-related; BAX INHIBITOR-RELATED; FvH4_2g23070.t1_v4.0.a2; PROTEIN LIFEGUARD 3-RELATED	NA	NA
TE_homo_27865	2.10518	0.00667104	Fvb2:18916776-18916920	Fvb2	18914044	18915001	FvH4_2g23061	+	1775	Downstream TTS	1.07329	0.734836	AT4G23160.3 | cysteine-rich RECEPTOR-like kinase | Chr4:12129485-12133157 FORWARD LENGTH=1043 | 201606; gag-pol polyprotein [Rosa rugosa]; sp|P04146|COPIA_DROME Copia protein OS=Drosophila melanogaster OX=7227 GN=GIP PE=1 SV=3; tr|J7G582|J7G582_ROSRU Gag-pol polyprotein OS=Rosa rugosa OX=74645 PE=4 SV=1	FvH4_2g23061.t1_v4.0.a2; GAG-POL-RELATED RETROTRANSPOSON; retrotransposon nucleocapsid; Retrotran_Ty1/copia-like; RNase_HI_RT_Ty1;	retrotransposon nucleocapsid	GO:0000943
TE_homo_27865	2.10518	0.00667104	Fvb2:18916776-18916920	Fvb2	18915696	18916180	FvH4_2g23062	+	596	Downstream TTS	-0.394626	NA	NA	FvH4_2g23062.t1_v4.0.a2	NA	NA
TE_homo_130365	2.11122	0.0273477	Fvb7:13094667-13095050	Fvb7	13092431	13094429	FvH4_7g14980	+	238	Downstream TTS	0.987947	0.102809	AT4G00310.2 | Putative membrane lipoprotein | Chr4:133857-135235 FORWARD LENGTH=302 | 201606; PREDICTED: uncharacterized protein LOC101314598 [Fragaria vesca subsp. vesca]; tr|A0A2P6SHS4|A0A2P6SHS4_ROSCH Putative transcription factor interactor and regulator C3H-WRC/GRF family OS=Rosa chinensis OX=74649 GN=RchiOBHm_Chr1g0357021 PE=4 SV=1	disorder_prediction; FAMILY NOT NAMED; FvH4_7g14980.t1_v4.0.a2; ; WRC; WRC_dom	NA	NA
TE_homo_130365	2.11122	0.0273477	Fvb7:13094667-13095050	Fvb7	13095533	13098822	FvH4_7g14990	-	484	Downstream TTS	0.402504	0.74905	AT5G41460.1 | transferring glycosyl group transferase (DUF604) | Chr5:16589724-16592197 REVERSE LENGTH=524 | 201606; PREDICTED: uncharacterized protein LOC101314311 [Fragaria vesca subsp. vesca]; tr|A0A2P6SHS9|A0A2P6SHS9_ROSCH Uncharacterized protein OS=Rosa chinensis OX=74649 GN=RchiOBHm_Chr1g0357031 PE=4 SV=1	DUF604; FRINGE-RELATED; FvH4_7g14990.t1_v4.0.a2;	NA	NA
TE_homo_87558	2.13906	0.00181658	Fvb5:13365820-13366228	Fvb5	13368134	13368527	FvH4_5g21990	-	1907	Downstream TTS	-0.820917	0.525525	AT2G35290.1 | hypothetical protein | Chr2:14861635-14862000 REVERSE LENGTH=121 | 201606; PREDICTED: uncharacterized protein LOC101309055 [Fragaria vesca subsp. vesca]; tr|A0A2P6P9Z0|A0A2P6P9Z0_ROSCH Uncharacterized protein OS=Rosa chinensis OX=74649 GN=RchiOBHm_Chr7g0209491 PE=4 SV=1	FAMILY NOT NAMED; FvH4_5g21990.t1_v4.0.a2;	NA	NA
TE_struc_1301	2.22152	0.00488542	Fvb3:32528562-32528898	Fvb3	32526072	32528123	FvH4_3g37980	+	439	Downstream TTS	NA	NA	AT4G27190.1 | NB-ARC domain-containing disease resistance protein | Chr4:13620977-13623934 REVERSE LENGTH=985 | 201606; PREDICTED: disease resistance protein At4g27190-like [Fragaria vesca subsp. vesca]; sp|Q9T048|DRL27_ARATH Disease resistance protein At4g27190 OS=Arabidopsis thaliana OX=3702 GN=At4g27190 PE=2 SV=1; tr|A0A2P6QMR3|A0A2P6QMR3_ROSCH Putative toll-like receptor, P-loop containing nu…	Activation of caspases through apoptosome-mediated cleavage; ADP binding; FAMILY NOT NAMED; Formation of apoptosome; FvH4_3g37980.t1_v4.0.a2; L domain-like; LRR_dom_sf; NB-ARC; Neutrophil degranulation; P-loop containing nucleoside triphosphate hydrolases; P-loop_NTPase; Regulation of the apoptosome activity; ; SMAC (DIABLO) binds to IAPs; SMAC(DIABLO)-mediated dissociation of IAP:caspase complex…	ADP binding	GO:0043531
TE_struc_1301	2.22152	0.00488542	Fvb3:32528562-32528898	Fvb3	32529284	32531134	FvH4_3g37990	-	387	Downstream TTS	NA	NA	AT2G29590.1 | Thioesterase superfamily protein | Chr2:12654602-12655432 REVERSE LENGTH=158 | 201606; PREDICTED: acyl-coenzyme A thioesterase 13-like [Fragaria vesca subsp. vesca] &gt;gi|764558577|ref|XP_011460919.1| PREDICTED: acyl-coenzyme A thioesterase 13-like [Fragaria vesca subsp. vesca]; sp|Q5R833|ACO13_PONAB Acyl-coenzyme A thioesterase 13 OS=Pongo abelii OX=9601 GN=ACOT13 PE=2 SV=1; tr|A0…	4HBT; ACOT13; acyl-CoA hydrolase activity; FvH4_3g37990.t1_v4.0.a2; HotDog_dom_sf; Mitochondrial Fatty Acid Beta-Oxidation; PaaI_thioesterase; ; THIOESTERASE SUPERFAMILY MEMBER-RELATED; Thioesterase/thiol ester dehydrase-isomerase; Thioestr_dom	fatty acyl-CoA hydrolase activity	GO:0047617
TE_homo_119413	2.25436	0.0163137	Fvb6:32159316-32159683	Fvb6	32158049	32158855	FvH4_6g40700	-	461	Upstream TSS	NA	NA	AT3G13130.1 | transmembrane protein | Chr3:4223008-4223613 FORWARD LENGTH=201 | 201606; PREDICTED: uncharacterized protein LOC105352304 [Fragaria vesca subsp. vesca]; tr|A0A314ZRC1|A0A314ZRC1_PRUYE Uncharacterized protein OS=Prunus yedoensis var. nudiflora OX=2094558 GN=Pyn_26353 PE=4 SV=1	DUF761; DUF761_pln; FAMILY NOT NAMED; FvH4_6g40700.t1_v4.0.a2	NA	NA
TE_homo_119413	2.25436	0.0163137	Fvb6:32159316-32159683	Fvb6	32160708	32165697	FvH4_6g40710	+	1026	Upstream TSS	2.01106	5.42885e-07	AT5G35790.1 | glucose-6-phosphate dehydrogenase 1 | Chr5:13956879-13959686 REVERSE LENGTH=576 | 201606; PREDICTED: glucose-6-phosphate 1-dehydrogenase, chloroplastic [Fragaria vesca subsp. vesca]; sp|Q43839|G6PDC_SOLTU Glucose-6-phosphate 1-dehydrogenase, chloroplastic OS=Solanum tuberosum OX=4113 PE=1 SV=1; tr|M9R1I4|M9R1I4_FRAAN Glucose-6-phosphate 1-dehydrogenase OS=Fragaria ananassa OX=3747 G…	disorder_prediction; Entner-Doudoroff pathway I; FvH4_6g40710.t1_v4.0.a2; G6PD; G6PD_C; G6P_DEHYDROGENASE; G6P_DH; G6P_DH_AS; G6P_DH_C; G6PDHDRGNASE; G6P_DH_NAD-bd; G6PD_N; GLUCOSE-6-PHOSPHATE 1-DEHYDROGENASE 1, CHLOROPLASTIC; GLUCOSE-6-PHOSPHATE 1-DEHYDROGENASE G6PD; glucose-6-phosphate dehydrogenase activity; glucose metabolic process; Glutathione metabolism; Glyceraldehyde-3-phosphate dehydrog…	glucose-6-phosphate dehydrogenase activity; glucose metabolic process; NADP binding; obsolete oxidation-reduction process; oxidoreductase activity, acting on CH-OH group of donors	GO:0004345; GO:0006006; GO:0016614; GO:0050661; GO:0055114
TE_struc_2722	2.31278	0.0393953	Fvb6:19464470-19465231	Fvb6	19461419	19463172	FvH4_6g25550	+	1298	Downstream TTS	0.284506	0.830235	NA	FvH4_6g25550.t1_v4.0.a2	NA	NA
TE_homo_93890	2.31991	0.0165545	Fvb5:22094703-22095095	Fvb5	22085722	22091945	FvH4_5g31170	-	2758	Upstream TSS	NA	NA	AT3G04380.2 | SET-domain containing protein lysine methyltransferase family protein | Chr3:1161602-1164539 FORWARD LENGTH=465 | 201606; PREDICTED: histone-lysine N-methyltransferase SUVR4-like [Fragaria vesca subsp. vesca]; sp|Q8W595|SUVR4_ARATH Histone-lysine N-methyltransferase SUVR4 OS=Arabidopsis thaliana OX=3702 GN=SUVR4 PE=1 SV=2; tr|A0A2P6PES1|A0A2P6PES1_ROSCH Putative histone-lysine N-met…	FAMILY NOT NAMED; FvH4_5g31170.t1_v4.0.a2; histone-lysine N-methyltransferase activity; INACTIVE HISTONE-LYSINE N-METHYLTRANSFERASE SUVR1-RELATED; protein binding; SET; SET_dom; SET domain; WIYLD; WIYLD_domain	obsolete histone lysine N-methyltransferase activity; protein binding	GO:0005515; GO:0018024
TE_homo_93890	2.31991	0.0165545	Fvb5:22094703-22095095	Fvb5	22095380	22097048	FvH4_5g31171	+	286	Upstream TSS	NA	NA	AT1G19160.1 | F-box family protein | Chr1:6614162-6615214 REVERSE LENGTH=350 | 201606; PREDICTED: putative F-box protein At1g50870 [Fragaria vesca subsp. vesca]; sp|Q9LMB0|FB10_ARATH Putative F-box protein At1g19160 OS=Arabidopsis thaliana OX=3702 GN=At1g19160 PE=4 SV=1; tr|A0A2P6R5K7|A0A2P6R5K7_ROSCH Putative F-box domain-containing protein OS=Rosa chinensis OX=74649 GN=RchiOBHm_Chr3g0449831 PE=…	FAMILY NOT NAMED; FBA_1; F-box; FBOX; F-box-assoc_dom_typ1; F-box-assoc_interact_dom; F-box_dom; F-box domain; F-box-like_dom_sf; FvH4_5g31171.t1_v4.0.a2; protein binding; TIGR01640	protein binding	GO:0005515
TE_homo_93890	2.31991	0.0165545	Fvb5:22094703-22095095	Fvb5	22097334	22099957	FvH4_5g31180	-	2240	Downstream TTS	-3.46779	0.28278	AT4G24530.1 | O-fucosyltransferase family protein | Chr4:12667424-12669713 REVERSE LENGTH=519 | 201606; PREDICTED: uncharacterized protein At1g04910 [Fragaria vesca subsp. vesca]; sp|Q7Y030|OFT31_ARATH O-fucosyltransferase 31 OS=Arabidopsis thaliana OX=3702 GN=OFUT31 PE=2 SV=1; tr|A0A2P6PH04|A0A2P6PH04_ROSCH Putative GDP-fucose protein O-fucosyltransferase OS=Rosa chinensis OX=74649 GN=RchiOBHm_C…	disorder_prediction; FAMILY NOT NAMED; FvH4_5g31180.t1_v4.0.a2; GDP-Fuc_O-FucTrfase; O-FucT; Rossmann-like_a/b/a_fold;	NA	NA
TE_homo_85241	2.38519	0.0484755	Fvb5:9355199-9355304	Fvb5	9351536	9354467	FvH4_5g16421	-	732	Upstream TSS	NA	NA	NA	disorder_prediction; FvH4_5g16421.t1_v4.0.a2	NA	NA
TE_homo_85241	2.38519	0.0484755	Fvb5:9355199-9355304	Fvb5	9357294	9359129	FvH4_5g16440	+	1991	Upstream TSS	-0.615749	0.35221	AT3G47830.1 | DNA glycosylase superfamily protein | Chr3:17647069-17648346 FORWARD LENGTH=293 | 201606; PREDICTED: putative DNA glycosylase At3g47830 [Fragaria vesca subsp. vesca]; sp|F4JCQ3|DG783_ARATH Putative DNA glycosylase At3g47830 OS=Arabidopsis thaliana OX=3702 GN=At3g47830 PE=3 SV=1; tr|A0A2P6P259|A0A2P6P259_ROSCH Putative DNA-(Apurinic or apyrimidinic site) lyase OS=Rosa chinensis OX=74…	base-excision repair; catalytic activity; disorder_prediction; Displacement of DNA glycosylase by APEX1; DNA-glycosylase; DNA_glycosylase; DNA repair; ENDO3c; FAMILY NOT NAMED; FvH4_5g16440.t1_v4.0.a2; HhH-GPD; HhH-GPD_domain; HTH_base_excis_C;	base-excision repair; catalytic activity; DNA repair	GO:0003824; GO:0006281; GO:0006284
TE_homo_125967	2.39313	0.0189567	Fvb7:5314902-5315093	Fvb7	5315333	5323313	FvH4_7g04900	+	241	Upstream TSS	0.791256	0.000100457	PREDICTED: uncharacterized protein LOC101292446 [Fragaria vesca subsp. vesca]; tr|A0A2P6RT83|A0A2P6RT83_ROSCH Uncharacterized protein OS=Rosa chinensis OX=74649 GN=RchiOBHm_Chr2g0124211 PE=4 SV=1	FvH4_7g04900.t1_v4.0.a2; FvH4_7g04900.t2_v4.0.a2	NA	NA
TE_homo_125967	2.39313	0.0189567	Fvb7:5314902-5315093	Fvb7	5308720	5314864	FvH4_7g04890	+	38	Downstream TTS	0.133869	0.850316	AT5G04980.2 | DNAse I-like superfamily protein | Chr5:1468575-1470684 REVERSE LENGTH=466 | 201606; PREDICTED: type I inositol 1,4,5-trisphosphate 5-phosphatase CVP2 isoform X1 [Fragaria vesca subsp. vesca]; sp|A8MR21|IP5PA_ARATH Type I inositol polyphosphate 5-phosphatase 10 OS=Arabidopsis thaliana OX=3702 GN=IP5P10 PE=3 SV=1; tr|A0A2P6SBE7|A0A2P6SBE7_ROSCH Putative phosphoric monoester hydrolase…	DNase I-like; Endo/exonuclease/phosphatase; Endo/exonu/phosph_ase_sf; Exo_endo_phos; FAMILY NOT NAMED; FvH4_7g04890.t11_v4.0.a2; FvH4_7g04890.t1_v4.0.a2; TYPE I INOSITOL POLYPHOSPHATE 5-PHOSPHATASE 10	NA	NA
TE_homo_126640	2.41312	0.0101053	Fvb7:6418095-6418265	Fvb7	6420533	6425104	FvH4_7g06360	+	2269	Upstream TSS	0.690922	0.0508676	AT5G04550.2 | type-1 restriction enzyme mjaxp r protein (DUF668) | Chr5:1303757-1305556 REVERSE LENGTH=599 | 201606; PREDICTED: uncharacterized protein LOC101303268 [Fragaria vesca subsp. vesca] &gt;gi|764627695|ref|XP_011469281.1| PREDICTED: uncharacterized protein LOC101303268 [Fragaria vesca subsp. vesca]; tr|A0A2P6SCD4|A0A2P6SCD4_ROSCH Uncharacterized protein OS=Rosa chinensis OX=74649 GN=Rch…	disorder_prediction; DUF3475; DUF668; FAMILY NOT NAMED; FvH4_7g06360.t1_v4.0.a2; FvH4_7g06360.t2_v4.0.a2; FvH4_7g06360.t3_v4.0.a2; FvH4_7g06360.t4_v4.0.a2; FvH4_7g06360.t5_v4.0.a2; FvH4_7g06360.t6_v4.0.a2; FvH4_7g06360.t7_v4.0.a2;	NA	NA
TE_homo_26216	2.41415	0.0231483	Fvb2:16259296-16259394	Fvb2	16257171	16257889	FvH4_2g19064	-	1407	Upstream TSS	NA	NA	NA	FvH4_2g19064.t1_v4.0.a2	NA	NA
TE_homo_26217	2.41563	0.0245278	Fvb2:16259313-16259417	Fvb2	16259708	16266950	FvH4_2g19070	+	292	Upstream TSS	1.35404	0.0473907	AT3G24820.1 | BSD domain-containing protein | Chr3:9062717-9064366 REVERSE LENGTH=186 | 201606; PREDICTED: uncharacterized protein LOC101295670 [Fragaria vesca subsp. vesca]; tr|A0A2P6PUE2|A0A2P6PUE2_ROSCH Putative BSD domain-containing protein OS=Rosa chinensis OX=74649 GN=RchiOBHm_Chr6g0284891 PE=4 SV=1	BSD; BSD_dom; BSD domain-like; BSD_dom_sf; disorder_prediction; FAMILY NOT NAMED; FvH4_2g19070.t1_v4.0.a2;	NA	NA
TE_struc_23	2.41659	0.0172144	Fvb1:434814-435169	Fvb1	429707	434675	FvH4_1g00870	-	139	Upstream TSS	0.392401	0.347595	AT5G57940.2 | cyclic nucleotide gated channel 5 | Chr5:23457116-23460439 FORWARD LENGTH=717 | 201606; PREDICTED: probable cyclic nucleotide-gated ion channel 5 [Fragaria vesca subsp. vesca]; sp|Q8RWS9|CNGC5_ARATH Probable cyclic nucleotide-gated ion channel 5 OS=Arabidopsis thaliana OX=3702 GN=CNGC5 PE=2 SV=1; tr|A0A2P6RI63|A0A2P6RI63_ROSCH Putative IQ motif, EF-hand binding, potassium channel, v…	cAMP-binding domain-like; CAP_ED; cNMP-bd_dom; cNMP-bd-like; cNMP_binding; CNMP_BINDING_3; disorder_prediction; EAGCHANLFMLY; FAMILY NOT NAMED; FvH4_1g00870.t1_v4.0.a2; FvH4_1g00870.t2_v4.0.a2; FvH4_1g00870.t4_v4.0.a2; ion channel activity; Ion_trans; Ion_trans_dom; ion transport; IQ; IQ_motif_EF-hand-BS; K_chnl_volt-dep_EAG/ELK/ERG; membrane; potassium ion transport; protein binding; RmlC-like_j…	membrane; monoatomic ion channel activity; monoatomic ion transport; potassium ion transport; protein binding; transmembrane transport; voltage-gated potassium channel activity	GO:0005216; GO:0005249; GO:0005515; GO:0006811; GO:0006813; GO:0016020; GO:0055085
TE_struc_23	2.41659	0.0172144	Fvb1:434814-435169	Fvb1	435496	439033	FvH4_1g00880	-	328	Downstream TTS	0.783515	0.206666	AT4G30580.1 | Phospholipid/glycerol acyltransferase family protein | Chr4:14932515-14934489 REVERSE LENGTH=356 | 201606; PREDICTED: 1-acyl-sn-glycerol-3-phosphate acyltransferase 1, chloroplastic-like [Fragaria vesca subsp. vesca]; sp|Q9LLY4|LPAT1_BRANA 1-acyl-sn-glycerol-3-phosphate acyltransferase 1, chloroplastic OS=Brassica napus OX=3708 GN=LPAT1 PE=2 SV=1; tr|A0A2P6RI54|A0A2P6RI54_ROSCH 1-ac…	1-acylglycerol-3-phosphate O-acyltransferase activity; 1-ACYL-SN-GLYCEROL-3-PHOSPHATE ACYLTRANSFERASE; 1-ACYL-SN-GLYCEROL-3-PHOSPHATE ACYLTRANSFERASE 1, CHLOROPLASTIC; Acyltransferase; AGP_acyltrans; CDP-diacylglycerol biosynthesis I; CDP-diacylglycerol biosynthesis III; FvH4_1g00880.t1_v4.0.a2; Glycerol-3-phosphate (1)-acyltransferase; Glycerolipid metabolism; Glycerophospholipid metabolism; LPL…	1-acylglycerol-3-phosphate O-acyltransferase activity; acyltransferase activity; membrane; phospholipid biosynthetic process	GO:0003841; GO:0008654; GO:0016020; GO:0016746
TE_homo_100149	2.54673	0.00231195	Fvb6:3541090-3541403	Fvb6	3542417	3546397	FvH4_6g06190	-	1015	Downstream TTS	-1.83447	0.0258294	AT4G02570.4 | cullin 1 | Chr4:1129315-1133435 FORWARD LENGTH=738 | 201606; PREDICTED: cullin-1-like [Fragaria vesca subsp. vesca]; sp|Q94AH6|CUL1_ARATH Cullin-1 OS=Arabidopsis thaliana OX=3702 GN=CUL1 PE=1 SV=1; tr|A0A2P6R6Z6|A0A2P6R6Z6_ROSCH Putative cullin OS=Rosa chinensis OX=74649 GN=RchiOBHm_Chr3g0455211 PE=4 SV=1	Cullin; CULLIN; Cullin_N; Cullin repeat-like; Cullin_repeat-like_dom_sf; FvH4_6g06190.t1_v4.0.a2; FvH4_6g06190.t4_v4.0.a2; Neddylation; ; ubiquitin-dependent protein catabolic process; ubiquitin protein ligase binding	ubiquitin-dependent protein catabolic process; ubiquitin protein ligase binding	GO:0006511; GO:0031625
TE_homo_133707	2.56732	0.0417018	Fvb7:21007452-21007752	Fvb7	21007817	21016934	FvH4_7g28350	+	66	Upstream TSS	-1.73631	6.51769e-15	AT2G44890.1 | cytochrome P450%2C family 704%2C subfamily A%2C polypeptide 1 | Chr2:18508392-18510308 REVERSE LENGTH=511 | 201606; PREDICTED: cytochrome P450 704C1-like [Fragaria vesca subsp. vesca]; sp|Q50EK3|C04C1_PINTA Cytochrome P450 704C1 OS=Pinus taeda OX=3352 GN=CYP704C1 PE=2 SV=1; tr|A0A2P6SMM1|A0A2P6SMM1_ROSCH Putative abieta-7,13-dien-18-ol hydroxylase OS=Rosa chinensis OX=74649 GN=RchiO…	Cytochrome P450; CYTOCHROME_P450; Cyt_P450; Cyt_P450_CS; Cyt_P450_E_grp-I; Cyt_P450_sf; EP450I; FAMILY NOT NAMED; FvH4_7g28350.t1_v4.0.a2; heme binding; iron ion binding; oxidation-reduction process; oxidoreductase activity, acting on paired donors, with incorporation or reduction of molecular oxygen; p450; P450;	heme binding; iron ion binding; obsolete oxidation-reduction process; oxidoreductase activity, acting on paired donors, with incorporation or reduction of molecular oxygen	GO:0005506; GO:0016705; GO:0020037; GO:0055114
TE_homo_133707	2.56732	0.0417018	Fvb7:21007452-21007752	Fvb7	21003621	21005653	FvH4_7g28340	+	1799	Downstream TTS	-3.60118	0.0483997	AT2G45510.1 | cytochrome P450%2C family 704%2C subfamily A%2C polypeptide 2 | Chr2:18753085-18754944 FORWARD LENGTH=511 | 201606; PREDICTED: cytochrome P450 704C1-like [Fragaria vesca subsp. vesca]; sp|Q50EK3|C04C1_PINTA Cytochrome P450 704C1 OS=Pinus taeda OX=3352 GN=CYP704C1 PE=2 SV=1; tr|A0A2P6SMM1|A0A2P6SMM1_ROSCH Putative abieta-7,13-dien-18-ol hydroxylase OS=Rosa chinensis OX=74649 GN=RchiO…	Coil; Cytochrome P450; CYTOCHROME_P450; Cyt_P450; Cyt_P450_CS; Cyt_P450_E_grp-I; Cyt_P450_sf; EP450I; FAMILY NOT NAMED; FvH4_7g28340.t1_v4.0.a2; heme binding; iron ion binding; oxidation-reduction process; oxidoreductase activity, acting on paired donors, with incorporation or reduction of molecular oxygen; p450; P450;	heme binding; iron ion binding; obsolete oxidation-reduction process; oxidoreductase activity, acting on paired donors, with incorporation or reduction of molecular oxygen	GO:0005506; GO:0016705; GO:0020037; GO:0055114
TE_homo_90920	2.65999	0.032493	Fvb5:18051852-18051992	Fvb5	18048279	18049657	FvH4_5g26600	+	2195	Downstream TTS	-0.85299	0.311006	AT1G76600.1 | poly polymerase | Chr1:28746975-28747625 FORWARD LENGTH=216 | 201606; PREDICTED: uncharacterized protein LOC101307793 [Fragaria vesca subsp. vesca]; tr|A0A2P6PC23|A0A2P6PC23_ROSCH Uncharacterized protein OS=Rosa chinensis OX=74649 GN=RchiOBHm_Chr7g0217541 PE=4 SV=1	DUF4228; DUF4228_plant; FAMILY NOT NAMED; FvH4_5g26600.t1_v4.0.a2; POLY POLYMERASE	NA	NA
TE_struc_2271	2.66615	0.00029955	Fvb5:23393167-23393601	Fvb5	23387949	23390994	FvH4_5g32410	+	2173	Downstream TTS	-0.0850271	0.942471	AT1G25360.1 | Pentatricopeptide repeat (PPR) superfamily protein | Chr1:8894428-8896800 FORWARD LENGTH=790 | 201606; PREDICTED: pentatricopeptide repeat-containing protein At1g25360 [Fragaria vesca subsp. vesca]; sp|Q9FRI5|PPR57_ARATH Pentatricopeptide repeat-containing protein At1g25360 OS=Arabidopsis thaliana OX=3702 GN=PCMP-H74 PE=2 SV=1; tr|A0A2P6PD27|A0A2P6PD27_ROSCH Putative tetratricopepti…	DYW_deaminase; DYW_dom; FAMILY NOT NAMED; FvH4_5g32410.t1_v4.0.a2; Pentatricopeptide_repeat; PPR; PPR_2; protein binding; TIGR00756; TPR-like; TPR-like_helical_dom_sf; zinc ion binding	protein binding; zinc ion binding	GO:0005515; GO:0008270
TE_homo_75233	2.68386	5.63397e-06	Fvb4:21357230-21357652	Fvb4	21350616	21356798	FvH4_4g17410	-	432	Upstream TSS	-0.392406	0.0682308	AT5G18610.3 | Protein kinase superfamily protein | Chr5:6192736-6195371 FORWARD LENGTH=513 | 201606; PREDICTED: serine/threonine-protein kinase CDL1 [Fragaria vesca subsp. vesca]; sp|Q1PDV6|PBL27_ARATH Serine/threonine-protein kinase PBL27 OS=Arabidopsis thaliana OX=3702 GN=PBL27 PE=1 SV=1; tr|A0A2P6QYB5|A0A2P6QYB5_ROSCH Uncharacterized protein OS=Rosa chinensis OX=74649 GN=RchiOBHm_Chr4g0421331 …	ATP binding; disorder_prediction; FAMILY NOT NAMED; FvH4_4g17410.t1_v4.0.a2; FvH4_4g17410.t2_v4.0.a2; Kinase-like_dom_sf; Pkinase; protein kinase activity; PROTEIN_KINASE_ATP; Protein_kinase_ATP_BS; PROTEIN_KINASE_DOM; Protein kinase-like (PK-like); PROTEIN_KINASE_ST; protein phosphorylation; Prot_kinase_dom; Ser/Thr_kinase_AS; ; STKc_IRAK; TyrPK_CSF1-R	ATP binding; protein kinase activity; protein phosphorylation	GO:0004672; GO:0005524; GO:0006468
TE_homo_114399	2.82708	0.0133086	Fvb6:24114206-24114597	Fvb6	24109838	24111756	FvH4_6g30930	+	2450	Downstream TTS	-3.02303	1.3794e-06	AT1G15670.1 | Galactose oxidase/kelch repeat superfamily protein | Chr1:5390119-5391198 FORWARD LENGTH=359 | 201606; PREDICTED: F-box/kelch-repeat protein At1g15670-like [Fragaria vesca subsp. vesca]; sp|Q9LMR5|FK126_ARATH F-box/kelch-repeat protein At1g15670 OS=Arabidopsis thaliana OX=3702 GN=At1g15670 PE=2 SV=1; tr|M5WSY7|M5WSY7_PRUPE Uncharacterized protein OS=Prunus persica OX=3760 GN=PRUPE_3…	FAMILY NOT NAMED; FvH4_6g30930.t1_v4.0.a2; Kelch_1; Kelch motif; Kelch-typ_b-propeller; protein binding;	protein binding	GO:0005515
TE_homo_30348	2.92778	0.0494171	Fvb2:25132028-25132430	Fvb2	25127887	25131598	FvH4_2g33540	-	430	Upstream TSS	-1.55107	4.02375e-05	AT5G67320.1 | WD-40 repeat family protein | Chr5:26857268-26860974 FORWARD LENGTH=613 | 201606; PREDICTED: F-box-like/WD repeat-containing protein TBL1XR1 [Fragaria vesca subsp. vesca]; sp|Q9FN19|HOS15_ARATH WD40 repeat-containing protein HOS15 OS=Arabidopsis thaliana OX=3702 GN=HOS15 PE=2 SV=1; tr|A0A2P6Q0T8|A0A2P6Q0T8_ROSCH Putative transcription factor WD40-like family OS=Rosa chinensis OX=746…	Coil; disorder_prediction; FvH4_2g33540.t1_v4.0.a2; G-protein_beta_WD-40_rep; GPROTEINBRPT; LisH; LISH; protein binding; WD40; WD40_repeat; WD40 REPEAT-CONTAINING PROTEIN HOS15; WD40_repeat_CS; WD40_repeat_dom; WD40_repeat_dom_sf; WD40 repeat-like; WD40 REPEAT PROTEIN; WD40/YVTN_repeat-like_dom_sf; WD_REPEATS_1; WD_REPEATS_2; WD_REPEATS_REGION	protein binding	GO:0005515
TE_homo_30348	2.92778	0.0494171	Fvb2:25132028-25132430	Fvb2	25133484	25136538	FvH4_2g33550	+	1055	Upstream TSS	0.526744	0.787529	hypothetical protein RchiOBHm_Chr6g0308941 [Rosa chinensis]; tr|A0A2P6Q0S5|A0A2P6Q0S5_ROSCH Uncharacterized protein OS=Rosa chinensis OX=74649 GN=RchiOBHm_Chr6g0308941 PE=4 SV=1	cell-cell signaling involved in cell fate commitment; CLE25/26; Coil; disorder_prediction; FAMILY NOT NAMED; FvH4_2g33550.t1_v4.0.a2;	cell-cell signaling involved in cell fate commitment	GO:0045168
TE_homo_30348	2.92778	0.0494171	Fvb2:25132028-25132430	Fvb2	25134475	25136818	FvH4_2g33560	+	2046	Upstream TSS	1.72356	0.0119353	NA	disorder_prediction; FvH4_2g33560.t1_v4.0.a2	NA	NA
TE_homo_130799	3.18096	0.0162018	Fvb7:13814239-13814360	Fvb7	13807005	13811947	FvH4_7g16040	+	2292	Downstream TTS	1.14117	0.0815369	AT2G46370.4 | Auxin-responsive GH3 family protein | Chr2:19034233-19036369 FORWARD LENGTH=586 | 201606; PREDICTED: probable indole-3-acetic acid-amido synthetase GH3.5 [Fragaria vesca subsp. vesca] &gt;gi|764624386|ref|XP_011468947.1| PREDICTED: probable indole-3-acetic acid-amido synthetase GH3.5 [Fragaria vesca subsp. vesca]; sp|Q6I581|GH35_ORYSJ Jasmonic acid-amido synthetase JAR1 OS=Oryza sat…	Coil; FAMILY NOT NAMED; FvH4_7g16040.t1_v4.0.a2; FvH4_7g16040.t2_v4.0.a2; FvH4_7g16040.t3_v4.0.a2; FvH4_7g16040.t4_v4.0.a2; FvH4_7g16040.t5_v4.0.a2; FvH4_7g16040.t6_v4.0.a2; GH3; Neutrophil degranulation;	NA	NA
TE_homo_130799	3.18096	0.0162018	Fvb7:13814239-13814360	Fvb7	13813326	13814049	FvH4_7g16050	+	190	Downstream TTS	NA	NA	AT3G61660.1 | hypothetical protein | Chr3:22816152-22816541 FORWARD LENGTH=129 | 201606; PREDICTED: uncharacterized protein LOC101296513 [Fragaria vesca subsp. vesca]; tr|A0A2P6SIA6|A0A2P6SIA6_ROSCH Uncharacterized protein OS=Rosa chinensis OX=74649 GN=RchiOBHm_Chr1g0358991 PE=4 SV=1	FAMILY NOT NAMED; FvH4_7g16050.t1_v4.0.a2;	NA	NA
TE_homo_64620	3.24397	5.26682e-07	Fvb4:8765798-8766032	Fvb4	8767057	8770499	FvH4_4g08570	-	1026	Downstream TTS	0.437004	0.63439	AT4G28025.1 | hypothetical protein | Chr4:13935836-13937367 REVERSE LENGTH=157 | 201606; PREDICTED: uncharacterized protein LOC101294646 [Fragaria vesca subsp. vesca]; tr|A0A2P6QU06|A0A2P6QU06_ROSCH Putative chlorophyll a/b binding protein OS=Rosa chinensis OX=74649 GN=RchiOBHm_Chr4g0404651 PE=4 SV=1	Chlorophyll a-b binding protein; FAMILY NOT NAMED; FvH4_4g08570.t1_v4.0.a2; FvH4_4g08570.t2_v4.0.a2	NA	NA
TE_homo_40841	3.32012	0.0172601	Fvb3:16112295-16112455	Fvb3	16112707	16119039	FvH4_3g22980	-	253	Downstream TTS	-0.367011	0.148546	AT5G55040.2 | DNA-binding bromodomain-containing protein | Chr5:22327727-22331703 REVERSE LENGTH=916 | 201606; PREDICTED: uncharacterized protein LOC101311740 [Fragaria vesca subsp. vesca]; sp|Q9ULD4|BRPF3_HUMAN Bromodomain and PHD finger-containing protein 3 OS=Homo sapiens OX=9606 GN=BRPF3 PE=1 SV=2; tr|A0A2P6QCI0|A0A2P6QCI0_ROSCH Putative chromatin remodeler Bromodomain family OS=Rosa chinensi…	Bromodomain; BROMODOMAIN; BROMODOMAIN_1; BROMODOMAIN_2; BROMODOMAIN CONTAINING PROTEIN; Bromodomain_CS; Bromodomain-like_sf; Coil; disorder_prediction; FvH4_3g22980.t1_v4.0.a2; protein binding; SWI/SNF NUCLEOSOME REMODELING COMPLEX COMPONENT	protein binding	GO:0005515
TE_homo_112414	3.34619	0.02792	Fvb6:21432616-21432794	Fvb6	21429412	21432463	FvH4_6g27820	-	153	Upstream TSS	0.826525	0.217496	AT2G42770.1 | Peroxisomal membrane 22 kDa (Mpv17/PMP22) family protein | Chr2:17798635-17799927 REVERSE LENGTH=232 | 201606; PREDICTED: protein Mpv17 isoform X2 [Fragaria vesca subsp. vesca]; sp|Q4P9K6|SYM1_USTMA Protein SYM1 OS=Ustilago maydis (strain 521 / FGSC 9021) OX=237631 GN=SYM1 PE=3 SV=1; tr|A0A2P6RV03|A0A2P6RV03_ROSCH Uncharacterized protein OS=Rosa chinensis OX=74649 GN=RchiOBHm_Chr2g0…	disorder_prediction; EXPRESSED PROTEIN; FvH4_6g27820.t1_v4.0.a2; integral component of membrane; Mpv17_PMP22; PEROXISOMAL MEMBRANE PROTEIN 2, PXMP2 MPV17	integral to membrane	GO:0016021
TE_homo_112414	3.34619	0.02792	Fvb6:21432616-21432794	Fvb6	21433168	21434106	FvH4_6g27830	-	375	Downstream TTS	NA	NA	AT2G27035.1 | early nodulin-like protein 20 | Chr2:11535670-11536251 FORWARD LENGTH=163 | 201606; PREDICTED: lamin-like protein [Fragaria vesca subsp. vesca]; sp|Q39131|LAML_ARATH Lamin-like protein OS=Arabidopsis thaliana OX=3702 GN=At5g15350 PE=2 SV=1; tr|A0A2P6QEZ3|A0A2P6QEZ3_ROSCH Putative cupredoxin OS=Rosa chinensis OX=74649 GN=RchiOBHm_Chr5g0049891 PE=4 SV=1	Cu_bind_like; Cupredoxin; Cupredoxins; EARLY NODULIN-LIKE PROTEIN 20; electron transfer activity; FAMILY NOT NAMED; FvH4_6g27830.t1_v4.0.a2; Phytocyanin; PHYTOCYANIN; Phytocyanin_dom	electron transfer activity	GO:0009055
TE_homo_7475	3.40981	0.0395639	Fvb1:15261939-15262058	Fvb1	15263955	15264444	FvH4_1g23421	+	1898	Upstream TSS	7.37875	0.000257206	PREDICTED: uncharacterized protein LOC101311124 [Fragaria vesca subsp. vesca]	FvH4_1g23421.t1_v4.0.a2	NA	NA
TE_homo_7475	3.40981	0.0395639	Fvb1:15261939-15262058	Fvb1	15257988	15261041	FvH4_1g23410	+	898	Downstream TTS	NA	NA	PREDICTED: uncharacterized protein LOC105352810 isoform X1 [Fragaria vesca subsp. vesca]; tr|A0A2P6RM39|A0A2P6RM39_ROSCH Putative galactose oxidase/kelch, beta-propeller, galactose oxidase, beta-propeller OS=Rosa chinensis OX=74649 GN=RchiOBHm_Chr2g0100421 PE=4 SV=1	FvH4_1g23410.t1_v4.0.a2; Kelch motif; Kelch-typ_b-propeller; protein binding	protein binding	GO:0005515
TE_homo_7475	3.40981	0.0395639	Fvb1:15261939-15262058	Fvb1	15262296	15263359	FvH4_1g23420	-	239	Downstream TTS	NA	NA	NA	Coil; disorder_prediction; DNA binding; FvH4_1g23420.t1_v4.0.a2; Histone_H5; HISTONEH5; nucleosome; nucleosome assembly	DNA binding; nucleosome; nucleosome assembly	GO:0000786; GO:0003677; GO:0006334
TE_homo_116328	3.44721	0.00811389	Fvb6:26972529-26972664	Fvb6	26967645	26972327	FvH4_6g34160	-	202	Upstream TSS	NA	NA	AT5G12000.1 | kinase with adenine nucleotide alpha hydrolases-like domain-containing protein | Chr5:3874151-3876780 REVERSE LENGTH=701 | 201606; PREDICTED: U-box domain-containing protein 35 isoform X2 [Fragaria vesca subsp. vesca]; sp|Q9SW11|PUB35_ARATH U-box domain-containing protein 35 OS=Arabidopsis thaliana OX=3702 GN=PUB35 PE=2 SV=2; tr|A0A314YIG8|A0A314YIG8_PRUYE U-box domain-containing pr…	Adenine nucleotide alpha hydrolases-like; ATP binding; Coil; disorder_prediction; FAMILY NOT NAMED; FvH4_6g34160.t1_v4.0.a2; Kinase-like_dom_sf; Pkinase; protein kinase activity; PROTEIN_KINASE_DOM; Protein kinase-like (PK-like); PROTEIN_KINASE_ST; PROTEIN KINASE SUPERFAMILY PROTEIN; protein phosphorylation; Prot_kinase_dom; Rossmann-like_a/b/a_fold; Ser/Thr_kinase_AS; STK_N; Usp; UspA	ATP binding; protein kinase activity; protein phosphorylation	GO:0004672; GO:0005524; GO:0006468
TE_homo_116328	3.44721	0.00811389	Fvb6:26972529-26972664	Fvb6	26973874	26977702	FvH4_6g34170	+	1211	Upstream TSS	-1.32579	0.0376425	AT1G72770.4 | HYPERSENSITIVE TO ABA1 | Chr1:27390998-27392851 FORWARD LENGTH=511 | 201606; PREDICTED: protein phosphatase 2C 16 [Fragaria vesca subsp. vesca] &gt;gi|764609456|ref|XP_011467398.1| PREDICTED: protein phosphatase 2C 16 [Fragaria vesca subsp. vesca]; sp|Q9CAJ0|P2C16_ARATH Protein phosphatase 2C 16 OS=Arabidopsis thaliana OX=3702 GN=HAB1 PE=1 SV=1; tr|L0BW65|L0BW65_FRAAN ABI1 OS=Fragar…	catalytic activity; cation binding; FvH4_6g34170.t1_v4.0.a2; FvH4_6g34170.t2_v4.0.a2; FvH4_6g34170.t3_v4.0.a2; PP2C; PP2C_BS; PP2Cc; PP2C-like; PPM_1; PPM_2; PPM-type_dom_sf; PPM-type_phosphatase_dom; protein dephosphorylation; PROTEIN PHOSPHATASE 2C; PROTEIN PHOSPHATASE 2C 16; protein serine/threonine phosphatase activity; T cell receptor signaling pathway; Th1 and Th2 cell differentiation	catalytic activity; cation binding; protein dephosphorylation; protein serine/threonine phosphatase activity	GO:0003824; GO:0004722; GO:0006470; GO:0043169
TE_homo_6336	3.47182	0.0101338	Fvb1:13495682-13495982	Fvb1	13498952	13506721	FvH4_1g21510	-	2971	Downstream TTS	NA	NA	AT1G47710.1 | Serine protease inhibitor (SERPIN) family protein | Chr1:17558271-17560061 FORWARD LENGTH=391 | 201606; PREDICTED: serpin-ZX-like [Fragaria vesca subsp. vesca]; sp|Q9S7T8|SPZX_ARATH Serpin-ZX OS=Arabidopsis thaliana OX=3702 GN=At1g47710 PE=1 SV=1; tr|A0A2P6RSN3|A0A2P6RSN3_ROSCH Putative Serpin family protein OS=Rosa chinensis OX=74649 GN=RchiOBHm_Chr2g0122001 PE=3 SV=1	extracellular space; FvH4_1g21510.t1_v4.0.a2; RING/U-box; SERINE PROTEASE INHIBITOR, SERPIN; Serpin; SERPIN; Serpin_CS; Serpin_dom; Serpin_fam; Serpins; Serpin_sf; Serpin_sf_2; ; ZF_RING_2; Znf_RING; Znf_RING/FYVE/PHD	extracellular space	GO:0005615
TE_homo_111556	3.54041	0.023056	Fvb6:20368931-20369073	Fvb6	20366235	20367033	FvH4_6g26673	-	1898	Upstream TSS	NA	NA	NA	FvH4_6g26673.t1_v4.0.a2	NA	NA
TE_homo_122464	3.72224	2.39549e-05	Fvb6:39527198-39527691	Fvb6	39522749	39526586	FvH4_6g54080	-	612	Upstream TSS	-0.475199	0.863166	AT5G14020.5 | Endosomal targeting BRO1-like domain-containing protein | Chr5:4523730-4525819 REVERSE LENGTH=401 | 201606; PREDICTED: uncharacterized protein LOC101309864 [Fragaria vesca subsp. vesca]; tr|A0A2P6S6Q2|A0A2P6S6Q2_ROSCH Putative BRO1 domain-containing protein OS=Rosa chinensis OX=74649 GN=RchiOBHm_Chr2g0176271 PE=4 SV=1	BRO1_Alix_like; BRO1_sf; BROX; disorder_prediction; ENDOSOMAL TARGETING BRO1-LIKE DOMAIN-CONTAINING PROTEIN; FvH4_6g54080.t1_v4.0.a2; FvH4_6g54080.t2_v4.0.a2; FvH4_6g54080.t3_v4.0.a2; UNCHARACTERIZED	NA	NA
TE_homo_122464	3.72224	2.39549e-05	Fvb6:39527198-39527691	Fvb6	39527811	39528949	FvH4_6g54090	-	121	Downstream TTS	-3.74483	5.9707e-13	PREDICTED: uncharacterized protein LOC101299315 [Fragaria vesca subsp. vesca]; tr|A0A2P6Q2R2|A0A2P6Q2R2_ROSCH Uncharacterized protein OS=Rosa chinensis OX=74649 GN=RchiOBHm_Chr5g0003461 PE=4 SV=1	FvH4_6g54090.t1_v4.0.a2	NA	NA
TE_homo_92774	3.95401	0.0320609	Fvb5:20670113-20670292	Fvb5	20671085	20675668	FvH4_5g29770	-	794	Downstream TTS	-0.528944	0.0872636	AT4G14110.1 | COP9 signalosome%2C subunit CSN8 | Chr4:8133049-8134867 REVERSE LENGTH=197 | 201606; PREDICTED: COP9 signalosome complex subunit 8 [Fragaria vesca subsp. vesca]; sp|P43255|CSN8_ARATH COP9 signalosome complex subunit 8 OS=Arabidopsis thaliana OX=3702 GN=CSN8 PE=1 SV=1; tr|A0A2P6PDJ8|A0A2P6PDJ8_ROSCH Putative COP9 signalosome, subunit CSN8 protein OS=Rosa chinensis OX=74649 GN=RchiOBH…	Cargo recognition for clathrin-mediated endocytosis; COP9_CSN8; COP9 signalosome; COP9 signalosome assembly; COP9 SIGNALOSOME COMPLEX SUBUNIT 8; CSN8_PSD8_EIF3K; DNA Damage Recognition in GG-NER; Formation of TC-NER Pre-Incision Complex; FvH4_5g29770.t1_v4.0.a2; Neddylation; protein deneddylation	COP9 signalosome; COP9 signalosome assembly; protein deneddylation	GO:0000338; GO:0008180; GO:0010387
TE_homo_80256	3.97336	0.00420254	Fvb4:30636340-30636480	Fvb4	30633387	30635313	FvH4_4g31560	-	1027	Upstream TSS	1.26579	1.9856e-07	AT2G02880.1 | mucin-like protein | Chr2:841303-843151 FORWARD LENGTH=314 | 201606; PREDICTED: uncharacterized protein LOC101307692 [Fragaria vesca subsp. vesca]; tr|A0A2P6R2Z8|A0A2P6R2Z8_ROSCH Uncharacterized protein OS=Rosa chinensis OX=74649 GN=RchiOBHm_Chr4g0440071 PE=4 SV=1	disorder_prediction; FAMILY NOT NAMED; FvH4_4g31560.t1_v4.0.a2; MUCIN-LIKE PROTEIN	NA	NA
TE_homo_91389	4.09822	0.0116083	Fvb5:18777272-18777607	Fvb5	18778985	18779672	FvH4_5g27530	-	1379	Downstream TTS	-1.14259	0.178624	PREDICTED: uncharacterized protein LOC105351964 [Fragaria vesca subsp. vesca]; tr|A0A2P6QFX2|A0A2P6QFX2_ROSCH Uncharacterized protein OS=Rosa chinensis OX=74649 GN=RchiOBHm_Chr5g0053551 PE=4 SV=1	Coil; FvH4_5g27530.t1_v4.0.a2	NA	NA
TE_homo_78231	4.19722	0.012773	Fvb4:26209465-26209831	Fvb4	26205727	26209130	FvH4_4g23860	-	335	Upstream TSS	4.13575	5.60148e-05	AT1G67400.1 | ELMO/CED-12 family protein | Chr1:25248099-25250664 REVERSE LENGTH=281 | 201606; PREDICTED: ELMO domain-containing protein A isoform X3 [Fragaria vesca subsp. vesca]; sp|Q54YW1|ELMOA_DICDI ELMO domain-containing protein A OS=Dictyostelium discoideum OX=44689 GN=elmoA PE=1 SV=1; tr|A0A2P6R0E5|A0A2P6R0E5_ROSCH Putative ELMO domain-containing protein OS=Rosa chinensis OX=74649 GN=RchiO…	ELMO; ELMO_CED12; ELMO/CED-12 FAMILY PROTEIN; ELMO_dom; ENGULFMENT AND CELL MOTILITY; FvH4_4g23860.t1_v4.0.a2	NA	NA
TE_homo_78231	4.19722	0.012773	Fvb4:26209465-26209831	Fvb4	26210268	26213118	FvH4_4g23870	-	438	Downstream TTS	10.097	0.0849523	AT1G67980.1 | caffeoyl-CoA 3-O-methyltransferase | Chr1:25487724-25488934 FORWARD LENGTH=232 | 201606; PREDICTED: flavonoid 3',5'-methyltransferase-like [Fragaria vesca subsp. vesca]; sp|C7AE94|FAOMT_VITVI Flavonoid 3',5'-methyltransferase OS=Vitis vinifera OX=29760 GN=FAOMT PE=1 SV=1; tr|A0A2P6R0H7|A0A2P6R0H7_ROSCH Putative flavonoid 3',5'-methyltransferase OS=Rosa chinensis OX=74649 GN=RchiOBHm…	AdoMet_MTases; FvH4_4g23870.t1_v4.0.a2; Methyltransf_3; O-methyltransferase activity; O-METHYLTRANSFERASE-RELATED; S-adenosyl-L-methionine-dependent methyltransferases; SAM-dependent_MTases; SAM_O-MeTrfase; SAM_OMT_I;	O-methyltransferase activity	GO:0008171
TE_homo_9494	4.30639	0.0209146	Fvb1:18288254-18288424	Fvb1	18288655	18289289	FvH4_1g26451	+	232	Upstream TSS	NA	NA	AT5G63230.1 | Carbohydrate-binding X8 domain superfamily protein | Chr5:25357473-25357808 REVERSE LENGTH=111 | 201606; PREDICTED: major pollen allergen Ole e 10-like [Prunus mume]; sp|Q84V39|ALL10_OLEEU Major pollen allergen Ole e 10 OS=Olea europaea OX=4146 PE=1 SV=1; tr|A0A067HG01|A0A067HG01_CITSI Uncharacterized protein OS=Citrus sinensis OX=2711 GN=CISIN_1g032550mg PE=4 SV=1	FAMILY NOT NAMED; FvH4_1g26451.t1_v4.0.a2; ; X8	NA	NA
TE_homo_9494	4.30639	0.0209146	Fvb1:18288254-18288424	Fvb1	18288966	18292093	FvH4_1g26460	-	543	Downstream TTS	-0.026995	0.983796	AT1G02500.2 | S-adenosylmethionine synthetase 1 | Chr1:519037-520218 FORWARD LENGTH=393 | 201606; PREDICTED: S-adenosylmethionine synthase 5 [Fragaria vesca subsp. vesca]; sp|A7Q0V4|METK5_VITVI S-adenosylmethionine synthase 5 OS=Vitis vinifera OX=29760 GN=METK5 PE=3 SV=1; tr|I1V8K6|I1V8K6_FRAAN S-adenosylmethionine synthase OS=Fragaria ananassa OX=3747 GN=SAMase PE=2 SV=1	2'-deoxymugineic acid phytosiderophore biosynthesis; ADOMET_SYNTHASE_1; ADOMET_SYNTHASE_2; ADOMET_SYNTHASE_CS; ATP binding; Cysteine and methionine metabolism; FvH4_1g26460.t1_v4.0.a2; MAT; methionine adenosyltransferase activity; Methylation; S-adenosyl-L-methionine cycle II; S-adenosylmethionine biosynthetic process; S-ADENOSYLMETHIONINE SYNTHASE 1-RELATED; S-adenosylmethionine synthetase; S-AD…	ATP binding; methionine adenosyltransferase activity; S-adenosylmethionine biosynthetic process	GO:0004478; GO:0005524; GO:0006556
TE_homo_97402	4.38913	0.0139872	Fvb5:27361188-27361532	Fvb5	27362054	27369327	FvH4_5g37230	-	523	Downstream TTS	-4.12017	0.0382901	protein FAR1-RELATED SEQUENCE 5-like [Rosa chinensis]; tr|A0A2P6PSC3|A0A2P6PSC3_ROSCH Putative transcription factor FAR family OS=Rosa chinensis OX=74649 GN=RchiOBHm_Chr6g0276821 PE=4 SV=1	disorder_prediction; FvH4_5g37230.t1_v4.0.a2	NA	NA
TE_homo_99690	4.43407	0.0156331	Fvb6:2616177-2616316	Fvb6	2614765	2615249	FvH4_6g04740	-	928	Upstream TSS	NA	NA	PREDICTED: F-box/FBD/LRR-repeat protein At3g26920-like [Fragaria vesca subsp. vesca]; tr|A0A251RAQ4|A0A251RAQ4_PRUPE Uncharacterized protein OS=Prunus persica OX=3760 GN=PRUPE_1G404400 PE=4 SV=1	FAMILY NOT NAMED; FvH4_6g04740.t1_v4.0.a2;	NA	NA
TE_homo_99690	4.43407	0.0156331	Fvb6:2616177-2616316	Fvb6	2616662	2619842	FvH4_6g04750	+	347	Upstream TSS	2.03502	0.00208848	AT3G04980.3 | DNAJ heat shock N-terminal domain-containing protein | Chr3:1378684-1382235 REVERSE LENGTH=1183 | 201606; PREDICTED: uncharacterized protein LOC101310244 [Fragaria vesca subsp. vesca]; sp|Q56237|DNAJ2_THET8 Chaperone protein DnaJ 2 OS=Thermus thermophilus (strain HB8 / ATCC 27634 / DSM 579) OX=300852 GN=dnaJ2 PE=3 SV=2; tr|A0A2P6R6I0|A0A2P6R6I0_ROSCH Putative DnaJ domain-containing …	Chaperone J-domain; Coil; disorder_prediction; DnaJ; DNAJ_2; DnaJ_domain; DNAJ HEAT SHOCK N-TERMINAL DOMAIN-CONTAINING PROTEIN; FAMILY NOT NAMED; FvH4_6g04750.t1_v4.0.a2; FvH4_6g04750.t2_v4.0.a2; FvH4_6g04750.t3_v4.0.a2; JDOMAIN; J_dom_sf	NA	NA
TE_struc_1360	4.44932	0.0394848	Fvb3:36262378-36262929	Fvb3	36265491	36275834	FvH4_3g43520	+	2563	Upstream TSS	-5.74888	0.000511731	AT2G44450.1 | beta glucosidase 15 | Chr2:18340966-18343744 FORWARD LENGTH=506 | 201606; PREDICTED: beta-glucosidase 13-like [Fragaria vesca subsp. vesca] &gt;gi|408384474|gb|AFU61922.1| beta-glucosidase 3 [Fragaria x ananassa]; sp|Q7XKV2|BGL13_ORYSJ Beta-glucosidase 13 OS=Oryza sativa subsp. japonica OX=39947 GN=BGLU13 PE=2 SV=2; tr|K4HXV6|K4HXV6_FRAAN Beta-glucosidase 3 OS=Fragaria ananassa OX=3…	BETA-GLUCOSIDASE 31-RELATED; carbohydrate metabolic process; FvH4_3g43520.t1_v4.0.a2; FvH4_3g43520.t2_v4.0.a2; GLHYDRLASE1; Glyco_hydro_1; Glyco_hydro_1_N_CS; Glycoside_hydrolase_SF; GLYCOSYL HYDROLASE; GLYCOSYL_HYDROL_F1_2; hydrolase activity, hydrolyzing O-glycosyl compounds; (Trans)glycosidases	carbohydrate metabolic process; hydrolase activity, hydrolyzing O-glycosyl compounds	GO:0004553; GO:0005975
TE_struc_1360	4.44932	0.0394848	Fvb3:36262378-36262929	Fvb3	36256263	36260213	FvH4_3g43504	+	2165	Downstream TTS	3.73956	2.30324e-25	AT2G44480.3 | beta glucosidase 17 | Chr2:18359687-18363001 FORWARD LENGTH=548 | 201606; PREDICTED: beta-glucosidase 12-like isoform X1 [Fragaria vesca subsp. vesca]; sp|B8AVF0|BGL12_ORYSI Beta-glucosidase 12 OS=Oryza sativa subsp. indica OX=39946 GN=BGLU12 PE=3 SV=1; tr|A0A2P6QM43|A0A2P6QM43_ROSCH Putative glycosidase OS=Rosa chinensis OX=74649 GN=RchiOBHm_Chr5g0077981 PE=3 SV=1	BETA-GLUCOSIDASE 31-RELATED; carbohydrate metabolic process; FvH4_3g43504.t1_v4.0.a2; GLHYDRLASE1; Glyco_hydro_1; Glyco_hydro_1_N_CS; Glycoside_hydrolase_SF; GLYCOSYL HYDROLASE; GLYCOSYL_HYDROL_F1_2; hydrolase activity, hydrolyzing O-glycosyl compounds; (Trans)glycosidases	carbohydrate metabolic process; hydrolase activity, hydrolyzing O-glycosyl compounds	GO:0004553; GO:0005975
TE_homo_122525	4.93979	0.00117035	Fvb6:39661077-39661286	Fvb6	39656941	39660856	FvH4_6g54271	-	221	Upstream TSS	0.0792415	0.795242	AT3G26730.1 | RING/U-box superfamily protein | Chr3:9823770-9827270 FORWARD LENGTH=772 | 201606; PREDICTED: RING finger protein 10 [Fragaria vesca subsp. vesca]; sp|Q32NQ8|RNF10_XENLA RING finger protein 10 OS=Xenopus laevis OX=8355 GN=rnf10 PE=2 SV=1; tr|A0A2P6S6N8|A0A2P6S6N8_ROSCH Putative transcription factor C2H2 family OS=Rosa chinensis OX=74649 GN=RchiOBHm_Chr2g0176461 PE=4 SV=1	disorder_prediction; FAMILY NOT NAMED; FvH4_6g54271.t1_v4.0.a2; Mag2/Rnf10; metal ion binding; RING-HC_RNF10; RING/U-box; zf-C3HC4; ZF_RING_1; ZF_RING_2; Znf_C3HC4_RING-type; Znf_RING; Znf_RING_CS; Znf_RING/FYVE/PHD	metal ion binding	GO:0046872
TE_struc_125	5.00405	0.0353105	Fvb1:9726256-9726941	Fvb1	9727026	9739754	FvH4_1g16800	-	86	Downstream TTS	0.589083	0.0967491	AT4G37280.1 | MRG family protein | Chr4:17546748-17549362 REVERSE LENGTH=320 | 201606; PREDICTED: mortality factor 4-like protein 1 [Fragaria vesca subsp. vesca]; sp|Q94C32|MRG1_ARATH Protein MRG1 OS=Arabidopsis thaliana OX=3702 GN=MRG1 PE=1 SV=1; tr|A0A2P6RNS4|A0A2P6RNS4_ROSCH Putative chromatin remodeling &amp; transcriptional activation CHROMO-DOMAIN family OS=Rosa chinensis OX=74649 GN=RchiOB…	chromatin organization; CHROMO; Chromo/chromo_shadow_dom; Chromo domain-like; Chromo-like_dom_sf; disorder_prediction; EAF3_MRG15; FvH4_1g16800.t1_v4.0.a2; MORTALITY FACTOR 4-LIKE PROTEIN; MRG; MRG_C_sf; MRG_dom; nucleus; regulation of transcription, DNA-templated; ; Tudor-knot	chromatin organization; nucleus; regulation of DNA-templated transcription	GO:0005634; GO:0006325; GO:0006355
TE_homo_3716	5.06584	0.00491948	Fvb1:9038831-9039273	Fvb1	9040926	9043906	FvH4_1g15890	+	1654	Upstream TSS	-0.0184297	0.989156	AT3G58880.1 | F-box/RNI-like superfamily protein | Chr3:21768485-21770167 REVERSE LENGTH=454 | 201606; PREDICTED: FBD-associated F-box protein At4g10400-like isoform X3 [Fragaria vesca subsp. vesca]; sp|Q9LXR4|FBL56_ARATH Putative F-box/LRR-repeat protein At3g58880 OS=Arabidopsis thaliana OX=3702 GN=At3g58880 PE=4 SV=1; tr|A0A2P6RND3|A0A2P6RND3_ROSCH Putative F-box domain, FBD domain, leucine-ric…	FAMILY NOT NAMED; F-box; F-box_dom; F-box domain; F-box-like_dom_sf; FvH4_1g15890.t1_v4.0.a2; L domain-like; LRR_dom_sf; protein binding;	protein binding	GO:0005515
TE_homo_3716	5.06584	0.00491948	Fvb1:9038831-9039273	Fvb1	9034793	9037427	FvH4_1g15880	+	1404	Downstream TTS	-1.08938	0.000327233	AT2G42730.1 | F-box/FBD/LRR protein | Chr2:17789606-17791218 REVERSE LENGTH=457 | 201606; PREDICTED: F-box/LRR-repeat protein At3g58900-like isoform X1 [Fragaria vesca subsp. vesca]; sp|Q0WR05|FBL39_ARATH F-box/LRR-repeat protein At2g42730 OS=Arabidopsis thaliana OX=3702 GN=At2g42730 PE=2 SV=1; tr|A0A2P6RND3|A0A2P6RND3_ROSCH Putative F-box domain, FBD domain, leucine-rich repeat domain, L domain-…	FAMILY NOT NAMED; FBD; F-box; FBOX; F-box_dom; F-box domain; F-box-like_dom_sf; FvH4_1g15880.t1_v4.0.a2; LRR_dom_sf; protein binding; RNI-like;	protein binding	GO:0005515
TE_struc_216	5.08315	0.023056	Fvb1:15292005-15292716	Fvb1	15289284	15290712	FvH4_1g23430	-	1293	Upstream TSS	NA	NA	AT4G08250.1 | GRAS family transcription factor | Chr4:5196787-5198238 FORWARD LENGTH=483 | 201606; PREDICTED: nodulation-signaling pathway 2 protein-like [Fragaria vesca subsp. vesca]; sp|Q5NE24|NSP2_MEDTR Nodulation-signaling pathway 2 protein OS=Medicago truncatula OX=3880 GN=NSP2 PE=1 SV=1; tr|A0A2P5EDE6|A0A2P5EDE6_TREOI GRAS transcription factor OS=Trema orientale OX=63057 GN=TorDIP1 PE=3 SV=1	Coil; FAMILY NOT NAMED; FvH4_1g23430.t1_v4.0.a2; GRAS; ; TF_GRAS	NA	NA
TE_struc_216	5.08315	0.023056	Fvb1:15292005-15292716	Fvb1	15294992	15299416	FvH4_1g23440	-	2277	Downstream TTS	0.942258	0.137974	AT3G18770.1 | Autophagy-related protein 13 | Chr3:6460026-6462510 REVERSE LENGTH=625 | 201606; PREDICTED: autophagy-related protein 13 [Fragaria vesca subsp. vesca] &gt;gi|764623432|ref|XP_011468868.1| PREDICTED: autophagy-related protein 13 [Fragaria vesca subsp. vesca] &gt;gi|764623437|ref|XP_011468869.1| PREDICTED: autophagy-related protein 13 [Fragaria vesca subsp. vesca]; sp|F4J8V5|AT13B_ARA…	ATG13; Atg13_N; Atg1/ULK1 kinase complex; autophagosome assembly; autophagy; AUTOPHAGY-RELATED PROTEIN 13B; disorder_prediction; FvH4_1g23440.t1_v4.0.a2; FvH4_1g23440.t2_v4.0.a2; FvH4_1g23440.t3_v4.0.a2; FvH4_1g23440.t4_v4.0.a2; Macroautophagy; UNCHARACTERIZED	autophagosome assembly; autophagy	GO:0000045; GO:0006914
TE_homo_9639	5.20094	0.00667104	Fvb1:18452299-18452891	Fvb1	18453198	18458596	FvH4_1g26620	+	308	Upstream TSS	-0.841359	0.411576	AT3G62270.1 | HCO3- transporter family | Chr3:23042528-23045633 REVERSE LENGTH=703 | 201606; PREDICTED: boron transporter 1 [Fragaria vesca subsp. vesca]; sp|Q9M1P7|BOR2_ARATH Probable boron transporter 2 OS=Arabidopsis thaliana OX=3702 GN=BOR2 PE=2 SV=1; tr|A0A2P6RFE4|A0A2P6RFE4_ROSCH Putative bicarbonate transporter OS=Rosa chinensis OX=74649 GN=RchiOBHm_Chr3g0486761 PE=4 SV=1	ANION EXCHANGE PROTEIN; anion transport; Bicarbonate transporters; BORON TRANSPORTER 2-RELATED; disorder_prediction; FvH4_1g26620.t1_v4.0.a2; FvH4_1g26620.t4_v4.0.a2; HCO3_cotransp; HCO3_transpt_C; HCO3_transpt_euk; inorganic anion exchanger activity; integral component of membrane; membrane	integral to membrane; membrane; monoatomic anion transport; solute:inorganic anion antiporter activity	GO:0005452; GO:0006820; GO:0016020; GO:0016021
TE_struc_686	5.34983	5.45199e-08	Fvb2:21867454-21867633	Fvb2	21868179	21869781	FvH4_2g27610	+	547	Upstream TSS	1.07331	0.772139	AT5G59670.2 | Leucine-rich repeat protein kinase family protein | Chr5:24041538-24045478 FORWARD LENGTH=868 | 201606; putative leucine-rich repeat receptor-like serine/threonine-protein kinase [Quercus suber]; sp|Q9FN94|RLK0_ARATH Receptor-like protein kinase At5g59670 OS=Arabidopsis thaliana OX=3702 GN=At5g59670 PE=1 SV=1; tr|A0A2P4MN24|A0A2P4MN24_QUESU Putative leucine-rich repeat receptor-like…	ATP binding; FAMILY NOT NAMED; FvH4_2g27610.t1_v4.0.a2; Kinase-like_dom_sf; Pkinase_Tyr; protein kinase activity; PROTEIN_KINASE_DOM; Protein kinase-like (PK-like); protein phosphorylation; Prot_kinase_dom; Ser-Thr/Tyr_kinase_cat_dom;	ATP binding; protein kinase activity; protein phosphorylation	GO:0004672; GO:0005524; GO:0006468
TE_struc_686	5.34983	5.45199e-08	Fvb2:21867454-21867633	Fvb2	21863222	21867167	FvH4_2g27592	+	287	Downstream TTS	NA	NA	PREDICTED: uncharacterized protein LOC101304350 [Fragaria vesca subsp. vesca] &gt;gi|764540208|ref|XP_011459055.1| PREDICTED: uncharacterized protein LOC101304350 [Fragaria vesca subsp. vesca]	disorder_prediction; FvH4_2g27592.t1_v4.0.a2	NA	NA
TE_struc_686	5.34983	5.45199e-08	Fvb2:21867454-21867633	Fvb2	21870283	21873380	FvH4_2g27620	-	2651	Downstream TTS	1.66595	3.27e-08	AT1G21680.1 | DPP6 N-terminal domain-like protein | Chr1:7613028-7615148 FORWARD LENGTH=706 | 201606; PREDICTED: uncharacterized protein LOC101292474 [Fragaria vesca subsp. vesca]; sp|Q6NAR1|TOLB_RHOPA Tol-Pal system protein TolB OS=Rhodopseudomonas palustris (strain ATCC BAA-98 / CGA009) OX=258594 GN=tolB PE=3 SV=1; tr|A0A2P6PXE3|A0A2P6PXE3_ROSCH Putative transcription factor WD40-like family OS…	6-blade_b-propeller_TolB-like; DPP6 N-terminal domain-like; DPP6 N-TERMINAL DOMAIN-LIKE PROTEIN; FAMILY NOT NAMED; FvH4_2g27620.t1_v4.0.a2; PD40	NA	NA
TE_homo_40559	5.41627	0.0490282	Fvb3:15802249-15802365	Fvb3	15803788	15811777	FvH4_3g22790	-	1424	Downstream TTS	4.857	0.334001	AT2G29120.1 | glutamate receptor 2.7 | Chr2:12511479-12515893 REVERSE LENGTH=952 | 201606; PREDICTED: glutamate receptor 2.7-like [Fragaria vesca subsp. vesca]; sp|Q8LGN0|GLR27_ARATH Glutamate receptor 2.7 OS=Arabidopsis thaliana OX=3702 GN=GLR2.7 PE=2 SV=3; tr|A0A2P6QCD1|A0A2P6QCD1_ROSCH Glutamate receptor OS=Rosa chinensis OX=74649 GN=RchiOBHm_Chr5g0039801 PE=3 SV=1	ANF_lig-bd_rcpt; ANF_receptor; FvH4_3g22790.t1_v4.0.a2; GluR_Plant; IGluLR_plant; IONOTROPIC GLUTAMATE RECEPTOR; ionotropic glutamate receptor activity; Iontropic_Glu_rcpt_pln; Iontro_rcpt; Lig_chan; membrane; PBP1_GABAb_receptor; Peripla_BP_I; Periplasmic binding protein-like I; Periplasmic binding protein-like II; SBP_bac_3; ; Solute-binding_3/MltF_N; Voltage-gated potassium channels	glutamate-gated receptor activity; membrane	GO:0004970; GO:0016020
TE_homo_122261	5.47232	0.00181658	Fvb6:38988266-38988400	Fvb6	38988678	38993754	FvH4_6g53090	+	279	Upstream TSS	-0.0452697	0.971551	AT5G14220.1 | Flavin containing amine oxidoreductase family | Chr5:4583506-4587369 REVERSE LENGTH=508 | 201606; PREDICTED: protoporphyrinogen oxidase, mitochondrial [Fragaria vesca subsp. vesca]; sp|O24164|PPOM_TOBAC Protoporphyrinogen oxidase, mitochondrial OS=Nicotiana tabacum OX=4097 GN=PPXII PE=1 SV=1; tr|A0A2P6S6A1|A0A2P6S6A1_ROSCH Protoporphyrinogen oxidase OS=Rosa chinensis OX=74649 GN=Rch…	3,8-divinyl-chlorophyllide a biosynthesis III (aerobic, light independent); Amino_oxidase; disorder_prediction; FAD-linked reductases, C-terminal domain; FAD/NAD-bd_sf; FAD/NAD(P)-binding domain; FAMILY NOT NAMED; FvH4_6g53090.t1_v4.0.a2; Heme biosynthesis; oxidation-reduction process; oxidoreductase activity; oxygen-dependent protoporphyrinogen oxidase activity; Porphyrin and chlorophyll metabol…	obsolete oxidation-reduction process; oxidoreductase activity; oxygen-dependent protoporphyrinogen oxidase activity; porphyrin-containing compound biosynthetic process	GO:0004729; GO:0006779; GO:0016491; GO:0055114
TE_struc_1658	5.50231	0.00464599	Fvb4:17182522-17182918	Fvb4	17184498	17185832	FvH4_4g13621	-	1581	Downstream TTS	NA	NA	AT3G31430.1 | zinc knuckle (CCHC-type) family protein | Chr3:12795861-12796871 REVERSE LENGTH=336 | 201606; PREDICTED: uncharacterized protein LOC105353156 [Fragaria vesca subsp. vesca]; tr|A0A2P4MMJ0|A0A2P4MMJ0_QUESU Uncharacterized protein OS=Quercus suber OX=58331 GN=CFP56_59889 PE=4 SV=1	At4g02000-like; DUF4283; FAMILY NOT NAMED; FvH4_4g13621.t1_v4.0.a2; ; zf-CCHC_4; Zn_knuckle_CX2CX4HX4C	NA	NA
TE_homo_80917	5.62718	0.00714699	Fvb4:32646690-32646789	Fvb4	32635580	32646551	FvH4_4g35300	-	139	Upstream TSS	0.597699	0.0374794	AT1G70060.2 | SIN3-like 4 | Chr1:26383789-26389568 FORWARD LENGTH=1326 | 201606; PREDICTED: paired amphipathic helix protein Sin3-like 4 isoform X1 [Fragaria vesca subsp. vesca]; sp|O04539|SNL4_ARATH Paired amphipathic helix protein Sin3-like 4 OS=Arabidopsis thaliana OX=3702 GN=SNL4 PE=3 SV=3; tr|A0A2P6R491|A0A2P6R491_ROSCH Putative transcription regulator Others family OS=Rosa chinensis OX=7464…	Coil; disorder_prediction; FvH4_4g35300.t14_v4.0.a2; FvH4_4g35300.t1_v4.0.a2; FvH4_4g35300.t3_v4.0.a2; FvH4_4g35300.t7_v4.0.a2; HDAC_interact_dom; NoRC negatively regulates rRNA expression; PAH; PAH2 domain; PAH_sf; PAIRED AMPHIPATHIC HELIX (PAH2) SUPERFAMILY PROTEIN-RELATED; Regulation of lipid metabolism by Peroxisome proliferator-activated receptor alpha (PPARalpha); regulation of transcriptio…	regulation of DNA-templated transcription; transcription corepressor activity	GO:0003714; GO:0006355
TE_struc_3004	5.64214	1.87103e-19	Fvb6:37157053-37157471	Fvb6	37152196	37154331	FvH4_6g49640	+	2722	Downstream TTS	1.25889	0.00470749	PREDICTED: uncharacterized protein LOC101309469 [Fragaria vesca subsp. vesca]; tr|A0A2P6R0N7|A0A2P6R0N7_ROSCH Putative F-box domain-containing protein OS=Rosa chinensis OX=74649 GN=RchiOBHm_Chr4g0430971 PE=4 SV=1	DUF295; FAMILY NOT NAMED; F-box; F-box_dom; F-box domain; F-box-like_dom_sf; FvH4_6g49640.t1_v4.0.a2; FvH4_6g49640.t2_v4.0.a2; protein binding;	protein binding	GO:0005515
TE_struc_3004	5.64214	1.87103e-19	Fvb6:37157053-37157471	Fvb6	37158218	37161537	FvH4_6g49660	-	748	Downstream TTS	-0.196618	0.761371	AT1G59650.1 | CW14 protein (DUF1336) | Chr1:21920099-21922670 FORWARD LENGTH=492 | 201606; PREDICTED: uncharacterized protein LOC101303718 [Fragaria vesca subsp. vesca]; sp|F4JSE7|EDR2_ARATH Protein ENHANCED DISEASE RESISTANCE 2 OS=Arabidopsis thaliana OX=3702 GN=EDR2 PE=2 SV=1; tr|A0A2P6S4X5|A0A2P6S4X5_ROSCH Uncharacterized protein OS=Rosa chinensis OX=74649 GN=RchiOBHm_Chr2g0169681 PE=4 SV=1	disorder_prediction; DUF1336; EDR2_C; FAMILY NOT NAMED; FvH4_6g49660.t1_v4.0.a2;	NA	NA
TE_homo_15455	6.1345	0.0311324	Fvb2:822132-822779	Fvb2	822966	831012	FvH4_2g00800	+	188	Upstream TSS	0.507937	0.0427443	AT4G19710.2 | aspartate kinase-homoserine dehydrogenase ii | Chr4:10725229-10729536 FORWARD LENGTH=916 | 201606; PREDICTED: bifunctional aspartokinase/homoserine dehydrogenase 2, chloroplastic-like isoform X1 [Fragaria vesca subsp. vesca]; sp|O81852|AKH2_ARATH Bifunctional aspartokinase/homoserine dehydrogenase 2, chloroplastic OS=Arabidopsis thaliana OX=3702 GN=AKHSDH2 PE=1 SV=1; tr|A0A2P6PKR3|A…	3-dehydroquinate biosynthesis II (archaea); AAK_AK-HSDH; AA_kinase; AceGlu_kinase-like_sf; ACT; ACT_7; ACT_AKi-HSDH-ThrA_2; ACT_AKi-HSDH-ThrA-like_1; ACT_dom; ACT-like; AK-HSDH_N; Amino acid synthesis and interconversion (transamination); aspartate family amino acid biosynthetic process; aspartate kinase activity; Aspartate_kinase_CS; ASPARTOKINASE; Asp/Glu/Uridylate_kinase; Asp/hSer_DH_NAD-bd; A…	amino acid biosynthetic process; amino acid metabolic process; aspartate family amino acid biosynthetic process; aspartate kinase activity; homoserine dehydrogenase activity; NADP binding; obsolete oxidation-reduction process; oxidoreductase activity	GO:0004072; GO:0004412; GO:0006520; GO:0008652; GO:0009067; GO:0016491; GO:0050661; GO:0055114
TE_homo_92586	6.97346	0.0338439	Fvb5:20433506-20433783	Fvb5	20435069	20436747	FvH4_5g29470	+	1287	Upstream TSS	NA	NA	PREDICTED: uncharacterized protein LOC101301010 [Fragaria vesca subsp. vesca]; tr|A0A2P6PAZ6|A0A2P6PAZ6_ROSCH Uncharacterized protein OS=Rosa chinensis OX=74649 GN=RchiOBHm_Chr7g0213421 PE=4 SV=1	disorder_prediction; FvH4_5g29470.t1_v4.0.a2	NA	NA
TE_homo_71190	7.77064	0.00266544	Fvb4:16015610-16015698	Fvb4	16010848	16013466	FvH4_4g12300	-	2144	Upstream TSS	8.12107	0.17651	AT5G16740.1 | Transmembrane amino acid transporter family protein | Chr5:5501044-5502856 REVERSE LENGTH=426 | 201606; PREDICTED: vacuolar amino acid transporter 1 isoform X2 [Fragaria vesca subsp. vesca] &gt;gi|764570529|ref|XP_011462563.1| PREDICTED: vacuolar amino acid transporter 1 isoform X1 [Fragaria vesca subsp. vesca]; sp|Q9LFE3|AVT1H_ARATH Amino acid transporter AVT1H OS=Arabidopsis thali…	Aa_trans; AA_transpt_TM; AMINO ACID TRANSPORTER; AMINO ACID TRANSPORTER AVT1H; FvH4_4g12300.t1_v4.0.a2	NA	NA
TE_homo_118236	8.73537	0.00301451	Fvb6:30101119-30101745	Fvb6	30097407	30100832	FvH4_6g38030	+	287	Downstream TTS	2.08582	0.0336425	AT1G17680.3 | tetratricopeptide repeat (TPR)-containing protein | Chr1:6076388-6082160 FORWARD LENGTH=896 | 201606; sp|Q9Y5Q9|TF3C3_HUMAN General transcription factor 3C polypeptide 3 OS=Homo sapiens OX=9606 GN=GTF3C3 PE=1 SV=1; tr|A0A2P6S029|A0A2P6S029_ROSCH Putative acetyltransferase A, auxiliary subunit OS=Rosa chinensis OX=74649 GN=RchiOBHm_Chr2g0151101 PE=4 SV=1; transcription factor tau sub…	FvH4_6g38030.t1_v4.0.a2; FvH4_6g38030.t2_v4.0.a2; FvH4_6g38030.t3_v4.0.a2; FvH4_6g38030.t4_v4.0.a2; FvH4_6g38030.t5_v4.0.a2; protein binding; RNA Polymerase III Abortive And Retractive Initiation; RNA Polymerase III Transcription Initiation From Type 1 Promoter; RNA Polymerase III Transcription Initiation From Type 2 Promoter; RNA polymerase III transcription regulator recruiting activity; Tfc4/T…	obsolete RNA polymerase III transcription regulator recruiting activity; protein binding; transcription by RNA polymerase III	GO:0001004; GO:0005515; GO:0006383
TE_homo_35863	9.92533	5.93311e-06	Fvb3:8766439-8766563	Fvb3	8764825	8765158	FvH4_3g14330	+	1281	Downstream TTS	NA	NA	AT4G08850.1 | Leucine-rich repeat receptor-like protein kinase family protein | Chr4:5636693-5640496 REVERSE LENGTH=1045 | 201606; PREDICTED: probable LRR receptor-like serine/threonine-protein kinase At4g08850 [Fragaria vesca subsp. vesca]; sp|Q8VZG8|MIK2_ARATH MDIS1-interacting receptor like kinase 2 OS=Arabidopsis thaliana OX=3702 GN=MIK2 PE=1 SV=3; tr|A0A2P6QKA4|A0A2P6QKA4_ROSCH Uncharacteriz…	FAMILY NOT NAMED; FvH4_3g14330.t1_v4.0.a2; Kinase-like_dom_sf; Pkinase_Tyr; protein kinase activity; Protein kinase-like (PK-like); protein phosphorylation; Ser-Thr/Tyr_kinase_cat_dom;	protein kinase activity; protein phosphorylation	GO:0004672; GO:0006468

## Sheet: MITEs & Genes - Ripe vs Leaf
MITE_ID	log2FoldChange	padj	Coords	Gene_Chr	Gene_Start	Gene_End	Gene_ID	Gene_Strand	Distance_MITE_from_Gene	Location_MITE_from_Gene	log2FC_gene_RedvsLeaf	padj_gene_RedvsLeaf	BLAST	InterPro	GO Term	GO Accession
TE_homo_35863	-9.17921	3.63559e-05	Fvb3:8766439-8766563	Fvb3	8764825	8765158	FvH4_3g14330	+	1281	Downstream TTS	NA	NA	AT4G08850.1 | Leucine-rich repeat receptor-like protein kinase family protein | Chr4:5636693-5640496 REVERSE LENGTH=1045 | 201606; PREDICTED: probable LRR receptor-like serine/threonine-protein kinase At4g08850 [Fragaria vesca subsp. vesca]; sp|Q8VZG8|MIK2_ARATH MDIS1-interacting receptor like kinase 2 OS=Arabidopsis thaliana OX=3702 GN=MIK2 PE=1 SV=3; tr|A0A2P6QKA4|A0A2P6QKA4_ROSCH Uncharacteriz…	FAMILY NOT NAMED; FvH4_3g14330.t1_v4.0.a2; Kinase-like_dom_sf; Pkinase_Tyr; protein kinase activity; Protein kinase-like (PK-like); protein phosphorylation; Ser-Thr/Tyr_kinase_cat_dom;	protein kinase activity; protein phosphorylation	GO:0004672; GO:0006468
TE_homo_71190	-8.4882	0.000679646	Fvb4:16015610-16015698	Fvb4	16010848	16013466	FvH4_4g12300	-	2144	Upstream TSS	-8.52593	0.134524	AT5G16740.1 | Transmembrane amino acid transporter family protein | Chr5:5501044-5502856 REVERSE LENGTH=426 | 201606; PREDICTED: vacuolar amino acid transporter 1 isoform X2 [Fragaria vesca subsp. vesca] &gt;gi|764570529|ref|XP_011462563.1| PREDICTED: vacuolar amino acid transporter 1 isoform X1 [Fragaria vesca subsp. vesca]; sp|Q9LFE3|AVT1H_ARATH Amino acid transporter AVT1H OS=Arabidopsis thali…	Aa_trans; AA_transpt_TM; AMINO ACID TRANSPORTER; AMINO ACID TRANSPORTER AVT1H; FvH4_4g12300.t1_v4.0.a2	NA	NA
TE_homo_29278	-8.35375	0.0001782	Fvb2:22469195-22469405	Fvb2	22465663	22468618	FvH4_2g28770	-	577	Upstream TSS	1.16324	0.00915351	AT2G25310.1 | ER membrane protein complex subunit-like protein (DUF2012) | Chr2:10777436-10779123 REVERSE LENGTH=210 | 201606; PREDICTED: ER membrane protein complex subunit 7 homolog [Fragaria vesca subsp. vesca]; sp|Q8VY97|Y4213_ARATH ER membrane protein complex subunit 7 homolog OS=Arabidopsis thaliana OX=3702 GN=At4g32130 PE=2 SV=1; tr|A0A2P6PXP8|A0A2P6PXP8_ROSCH Putative carbohydrate-binding…	Carb-bd-like_fold; carbohydrate binding; DUF2012; EMC7; FvH4_2g28770.t1_v4.0.a2; ; Starch-binding domain-like; UNCHARACTERIZED	carbohydrate binding	GO:0030246
TE_homo_29278	-8.35375	0.0001782	Fvb2:22469195-22469405	Fvb2	22469806	22473789	FvH4_2g28780	-	402	Downstream TTS	0.0889493	0.800433	AT4G32140.1 | EamA-like transporter family | Chr4:15523037-15525195 REVERSE LENGTH=394 | 201606; PREDICTED: thiamine-repressible mitochondrial transport protein THI74 isoform X1 [Fragaria vesca subsp. vesca]; sp|Q03730|YMB8_YEAST Uncharacterized vacuolar membrane protein YML018C OS=Saccharomyces cerevisiae (strain ATCC 204508 / S288c) OX=559292 GN=YML018C PE=1 SV=1; tr|A0A2P6PXT7|A0A2P6PXT7_ROSCH…	EamA; EamA_dom; FvH4_2g28780.t1_v4.0.a2; integral component of membrane; membrane; Multidrug resistance efflux transporter EmrE; ; SOLUTE CARRIER FAMILY 35, MEMBER F5	integral to membrane; membrane	GO:0016020; GO:0016021
TE_homo_118236	-7.98926	0.00668369	Fvb6:30101119-30101745	Fvb6	30097407	30100832	FvH4_6g38030	+	287	Downstream TTS	-1.72691	0.0738627	AT1G17680.3 | tetratricopeptide repeat (TPR)-containing protein | Chr1:6076388-6082160 FORWARD LENGTH=896 | 201606; sp|Q9Y5Q9|TF3C3_HUMAN General transcription factor 3C polypeptide 3 OS=Homo sapiens OX=9606 GN=GTF3C3 PE=1 SV=1; tr|A0A2P6S029|A0A2P6S029_ROSCH Putative acetyltransferase A, auxiliary subunit OS=Rosa chinensis OX=74649 GN=RchiOBHm_Chr2g0151101 PE=4 SV=1; transcription factor tau sub…	FvH4_6g38030.t1_v4.0.a2; FvH4_6g38030.t2_v4.0.a2; FvH4_6g38030.t3_v4.0.a2; FvH4_6g38030.t4_v4.0.a2; FvH4_6g38030.t5_v4.0.a2; protein binding; RNA Polymerase III Abortive And Retractive Initiation; RNA Polymerase III Transcription Initiation From Type 1 Promoter; RNA Polymerase III Transcription Initiation From Type 2 Promoter; RNA polymerase III transcription regulator recruiting activity; Tfc4/T…	obsolete RNA polymerase III transcription regulator recruiting activity; protein binding; transcription by RNA polymerase III	GO:0001004; GO:0005515; GO:0006383
TE_homo_40559	-7.66084	0.0101167	Fvb3:15802249-15802365	Fvb3	15803788	15811777	FvH4_3g22790	-	1424	Downstream TTS	0.265116	0.966162	AT2G29120.1 | glutamate receptor 2.7 | Chr2:12511479-12515893 REVERSE LENGTH=952 | 201606; PREDICTED: glutamate receptor 2.7-like [Fragaria vesca subsp. vesca]; sp|Q8LGN0|GLR27_ARATH Glutamate receptor 2.7 OS=Arabidopsis thaliana OX=3702 GN=GLR2.7 PE=2 SV=3; tr|A0A2P6QCD1|A0A2P6QCD1_ROSCH Glutamate receptor OS=Rosa chinensis OX=74649 GN=RchiOBHm_Chr5g0039801 PE=3 SV=1	ANF_lig-bd_rcpt; ANF_receptor; FvH4_3g22790.t1_v4.0.a2; GluR_Plant; IGluLR_plant; IONOTROPIC GLUTAMATE RECEPTOR; ionotropic glutamate receptor activity; Iontropic_Glu_rcpt_pln; Iontro_rcpt; Lig_chan; membrane; PBP1_GABAb_receptor; Peripla_BP_I; Periplasmic binding protein-like I; Periplasmic binding protein-like II; SBP_bac_3; ; Solute-binding_3/MltF_N; Voltage-gated potassium channels	glutamate-gated receptor activity; membrane	GO:0004970; GO:0016020
TE_homo_92586	-7.63898	0.0163991	Fvb5:20433506-20433783	Fvb5	20435069	20436747	FvH4_5g29470	+	1287	Upstream TSS	NA	NA	PREDICTED: uncharacterized protein LOC101301010 [Fragaria vesca subsp. vesca]; tr|A0A2P6PAZ6|A0A2P6PAZ6_ROSCH Uncharacterized protein OS=Rosa chinensis OX=74649 GN=RchiOBHm_Chr7g0213421 PE=4 SV=1	disorder_prediction; FvH4_5g29470.t1_v4.0.a2	NA	NA
TE_struc_2131	-7.36044	0.00374664	Fvb5:14800287-14800689	Fvb5	14795185	14798023	FvH4_5g23460	-	2264	Upstream TSS	-1.03185	0.658757	AT3G07040.1 | NB-ARC domain-containing disease resistance protein | Chr3:2226244-2229024 REVERSE LENGTH=926 | 201606; PREDICTED: disease resistance protein RPM1-like [Fragaria vesca subsp. vesca]; sp|Q39214|RPM1_ARATH Disease resistance protein RPM1 OS=Arabidopsis thaliana OX=3702 GN=RPM1 PE=1 SV=1; tr|A0A2P6PAT4|A0A2P6PAT4_ROSCH Putative P-loop containing nucleoside triphosphate hydrolase, leuci…	Activation of caspases through apoptosome-mediated cleavage; ADP binding; Coil; DISEASERSIST; Formation of apoptosome; FvH4_5g23460.t1_v4.0.a2; L domain-like; LEUCINE-RICH REPEAT-CONTAINING PROTEIN; LRR_dom_sf; NB-ARC; Neutrophil degranulation; P-loop containing nucleoside triphosphate hydrolases; P-loop_NTPase; Regulation of the apoptosome activity; RX-CC_like; RX-like_CC; Rx_N; ; SMAC (DIABLO) …	ADP binding	GO:0043531
TE_struc_2131	-7.36044	0.00374664	Fvb5:14800287-14800689	Fvb5	14802345	14805192	FvH4_5g23470	-	1657	Downstream TTS	-3.56522	4.65607e-06	AT3G07040.1 | NB-ARC domain-containing disease resistance protein | Chr3:2226244-2229024 REVERSE LENGTH=926 | 201606; PREDICTED: disease resistance protein RPM1-like [Fragaria vesca subsp. vesca] &gt;gi|764590007|ref|XP_011465086.1| PREDICTED: disease resistance protein RPM1-like [Fragaria vesca subsp. vesca]; sp|Q39214|RPM1_ARATH Disease resistance protein RPM1 OS=Arabidopsis thaliana OX=3702 GN…	Activation of caspases through apoptosome-mediated cleavage; ADP binding; DISEASERSIST; Formation of apoptosome; FvH4_5g23470.t1_v4.0.a2; L domain-like; LEUCINE-RICH REPEAT-CONTAINING PROTEIN; LRR_dom_sf; NB-ARC; Neutrophil degranulation; P-loop containing nucleoside triphosphate hydrolases; P-loop_NTPase; Regulation of the apoptosome activity; RX-CC_like; RX-like_CC; Rx_N; ; SMAC (DIABLO) binds …	ADP binding	GO:0043531
TE_homo_9494	-6.93539	0.00443892	Fvb1:18288254-18288424	Fvb1	18288655	18289289	FvH4_1g26451	+	232	Upstream TSS	NA	NA	AT5G63230.1 | Carbohydrate-binding X8 domain superfamily protein | Chr5:25357473-25357808 REVERSE LENGTH=111 | 201606; PREDICTED: major pollen allergen Ole e 10-like [Prunus mume]; sp|Q84V39|ALL10_OLEEU Major pollen allergen Ole e 10 OS=Olea europaea OX=4146 PE=1 SV=1; tr|A0A067HG01|A0A067HG01_CITSI Uncharacterized protein OS=Citrus sinensis OX=2711 GN=CISIN_1g032550mg PE=4 SV=1	FAMILY NOT NAMED; FvH4_1g26451.t1_v4.0.a2; ; X8	NA	NA
TE_homo_9494	-6.93539	0.00443892	Fvb1:18288254-18288424	Fvb1	18288966	18292093	FvH4_1g26460	-	543	Downstream TTS	0.253956	0.731218	AT1G02500.2 | S-adenosylmethionine synthetase 1 | Chr1:519037-520218 FORWARD LENGTH=393 | 201606; PREDICTED: S-adenosylmethionine synthase 5 [Fragaria vesca subsp. vesca]; sp|A7Q0V4|METK5_VITVI S-adenosylmethionine synthase 5 OS=Vitis vinifera OX=29760 GN=METK5 PE=3 SV=1; tr|I1V8K6|I1V8K6_FRAAN S-adenosylmethionine synthase OS=Fragaria ananassa OX=3747 GN=SAMase PE=2 SV=1	2'-deoxymugineic acid phytosiderophore biosynthesis; ADOMET_SYNTHASE_1; ADOMET_SYNTHASE_2; ADOMET_SYNTHASE_CS; ATP binding; Cysteine and methionine metabolism; FvH4_1g26460.t1_v4.0.a2; MAT; methionine adenosyltransferase activity; Methylation; S-adenosyl-L-methionine cycle II; S-adenosylmethionine biosynthetic process; S-ADENOSYLMETHIONINE SYNTHASE 1-RELATED; S-adenosylmethionine synthetase; S-AD…	ATP binding; methionine adenosyltransferase activity; S-adenosylmethionine biosynthetic process	GO:0004478; GO:0005524; GO:0006556
TE_homo_23362	-6.92748	0.0167877	Fvb2:12143428-12143863	Fvb2	12137361	12141318	FvH4_2g13860	-	2110	Upstream TSS	-0.532663	0.113759	AT1G21200.2 | sequence-specific DNA binding transcription factor | Chr1:7421483-7422814 FORWARD LENGTH=443 | 201606; PREDICTED: uncharacterized protein LOC101296534 [Fragaria vesca subsp. vesca]; tr|A0A2P6PS33|A0A2P6PS33_ROSCH Putative transcription factor Trihelix family OS=Rosa chinensis OX=74649 GN=RchiOBHm_Chr6g0275551 PE=4 SV=1	Coil; disorder_prediction; FAMILY NOT NAMED; FvH4_2g13860.t1_v4.0.a2; Myb_DNA-bind_4; TRANSCRIPTION FACTOR	NA	NA
TE_homo_23362	-6.92748	0.0167877	Fvb2:12143428-12143863	Fvb2	12145879	12150043	FvH4_2g13861	+	2017	Upstream TSS	0.398256	0.412022	AT1G76860.1 | Small nuclear ribonucleoprotein family protein | Chr1:28854594-28855637 REVERSE LENGTH=98 | 201606; PREDICTED: sm-like protein LSM3B [Fragaria vesca subsp. vesca] &gt;gi|1366019269|ref|XP_024162124.1| sm-like protein LSM3B [Rosa chinensis] &gt;gi|1358150244|gb|PRQ24723.1| putative sm-like protein Lsm3 [Rosa chinensis]; sp|Q9C6K5|LSM3B_ARATH Sm-like protein LSM3B OS=Arabidopsis thali…	FvH4_2g13861.t1_v4.0.a2; LSM; Lsm3; LSm3; LSM_dom_euk/arc; LSM_dom_sf; mRNA decay by 5' to 3' exoribonuclease; mRNA Splicing - Major Pathway; mRNA splicing, via spliceosome; nuclear-transcribed mRNA catabolic process; RNA binding; ; Sm-like_LSM3; Sm-like ribonucleoproteins; U6 SNRNA-ASSOCIATED SM-LIKE PROTEIN LSM3	mRNA splicing, via spliceosome; nuclear-transcribed mRNA catabolic process; RNA binding	GO:0000398; GO:0000956; GO:0003723
TE_homo_101332	-5.1444	0.000261619	Fvb6:5890380-5890479	Fvb6	5883381	5889262	FvH4_6g09910	+	1118	Downstream TTS	1.52081	0.000613647	AT4G32010.2 | HSI2-like 1 | Chr4:15481231-15484897 FORWARD LENGTH=776 | 201606; PREDICTED: B3 domain-containing transcription repressor VAL2 isoform X2 [Fragaria vesca subsp. vesca]; sp|Q5CCK4|VAL2_ARATH B3 domain-containing transcription repressor VAL2 OS=Arabidopsis thaliana OX=3702 GN=VAL2 PE=1 SV=1; tr|A0A2P6R8G3|A0A2P6R8G3_ROSCH Putative chromatin regulator PHD family OS=Rosa chinensis OX=74…	B3; B3_DNA; B3_DNA-bd; B3 DOMAIN-CONTAINING TRANSCRIPTION REPRESSOR VAL2; disorder_prediction; DNA-bd_pseudobarrel_sf; DNA binding; DNA-binding pseudobarrel domain; FAMILY NOT NAMED; FvH4_6g09910.t1_v4.0.a2; zf-CW; ZF_CW; zinc ion binding; Znf_CW	DNA binding; zinc ion binding	GO:0003677; GO:0008270
TE_homo_101332	-5.1444	0.000261619	Fvb6:5890380-5890479	Fvb6	5893094	5897245	FvH4_6g09920	-	2616	Downstream TTS	0.351511	0.728994	AT3G08760.3 | Protein kinase superfamily protein | Chr3:2658129-2659984 REVERSE LENGTH=557 | 201606; PREDICTED: probable receptor-like protein kinase At3g55450 [Fragaria vesca subsp. vesca]; sp|Q9LFP7|PIX7_ARATH Probable serine/threonine-protein kinase PIX7 OS=Arabidopsis thaliana OX=3702 GN=PIX7 PE=1 SV=1; tr|A0A2P6R8G7|A0A2P6R8G7_ROSCH Uncharacterized protein OS=Rosa chinensis OX=74649 GN=RchiO…	ATP binding; disorder_prediction; FAMILY NOT NAMED; FvH4_6g09920.t1_v4.0.a2; Kinase-like_dom_sf; PIPLC_X_DOMAIN; Pkinase_Tyr; protein kinase activity; PROTEIN_KINASE_DOM; Protein kinase-like (PK-like); protein phosphorylation; Prot_kinase_dom; Ser-Thr/Tyr_kinase_cat_dom;	ATP binding; protein kinase activity; protein phosphorylation	GO:0004672; GO:0005524; GO:0006468
TE_homo_122261	-5.14437	0.00506259	Fvb6:38988266-38988400	Fvb6	38988678	38993754	FvH4_6g53090	+	279	Upstream TSS	0.153009	0.864219	AT5G14220.1 | Flavin containing amine oxidoreductase family | Chr5:4583506-4587369 REVERSE LENGTH=508 | 201606; PREDICTED: protoporphyrinogen oxidase, mitochondrial [Fragaria vesca subsp. vesca]; sp|O24164|PPOM_TOBAC Protoporphyrinogen oxidase, mitochondrial OS=Nicotiana tabacum OX=4097 GN=PPXII PE=1 SV=1; tr|A0A2P6S6A1|A0A2P6S6A1_ROSCH Protoporphyrinogen oxidase OS=Rosa chinensis OX=74649 GN=Rch…	3,8-divinyl-chlorophyllide a biosynthesis III (aerobic, light independent); Amino_oxidase; disorder_prediction; FAD-linked reductases, C-terminal domain; FAD/NAD-bd_sf; FAD/NAD(P)-binding domain; FAMILY NOT NAMED; FvH4_6g53090.t1_v4.0.a2; Heme biosynthesis; oxidation-reduction process; oxidoreductase activity; oxygen-dependent protoporphyrinogen oxidase activity; Porphyrin and chlorophyll metabol…	obsolete oxidation-reduction process; oxidoreductase activity; oxygen-dependent protoporphyrinogen oxidase activity; porphyrin-containing compound biosynthetic process	GO:0004729; GO:0006779; GO:0016491; GO:0055114
TE_homo_131594	-5.09589	0.00374664	Fvb7:15313520-15313629	Fvb7	15314815	15316956	FvH4_7g18330	+	1187	Upstream TSS	-2.67232	0.0332543	AT5G03530.2 | RAB GTPase homolog C2A | Chr5:885741-887061 REVERSE LENGTH=210 | 201606; PREDICTED: ras-related protein RABC2a-like [Fragaria vesca subsp. vesca]; sp|O49841|RAC2A_ARATH Ras-related protein RABC2a OS=Arabidopsis thaliana OX=3702 GN=RABC2A PE=1 SV=1; tr|A0A2P6SJ33|A0A2P6SJ33_ROSCH Putative small GTPase superfamily, P-loop containing nucleoside triphosphate hydrolase OS=Rosa chinensis …	FAMILY NOT NAMED; FvH4_7g18330.t1_v4.0.a2; GTPase activity; GTP binding; P-loop containing nucleoside triphosphate hydrolases; P-loop_NTPase; RAB; Rab18; Ras; RASTRNSFRMNG; ; Small_GTPase; Small_GTP-bd_dom; TIGR00231	GTPase activity; GTP binding	GO:0003924; GO:0005525
TE_struc_1243	-4.89209	0.0218973	Fvb3:28875010-28875666	Fvb3	28872883	28874869	FvH4_3g33471	-	141	Upstream TSS	0.916778	0.837129	AT5G60250.1 | zinc finger (C3HC4-type RING finger) family protein | Chr5:24252226-24254710 FORWARD LENGTH=655 | 201606; PREDICTED: LOW QUALITY PROTEIN: uncharacterized protein DDB_G0292642-like [Fragaria vesca subsp. vesca]; tr|A0A2P6QHS4|A0A2P6QHS4_ROSCH RBR-type E3 ubiquitin transferase OS=Rosa chinensis OX=74649 GN=RchiOBHm_Chr5g0060881 PE=3 SV=1	E3_UB_ligase_RBR; FvH4_3g33471.t1_v4.0.a2; nucleic acid binding; protein ubiquitination; RBR FAMILY RING FINGER AND IBR DOMAIN-CONTAINING; Ribonuclease H-like; RING/U-box; RNA-DNA hybrid ribonuclease activity; RNaseH_domain; RNaseH-like_sf; RNaseH_sf; RVT_3; ; ubiquitin-protein transferase activity; ZF_RING_1; ZF_RING_2; Znf_RING; Znf_RING_CS; Znf_RING/FYVE/PHD	nucleic acid binding; protein ubiquitination; RNA-DNA hybrid ribonuclease activity; ubiquitin-protein transferase activity	GO:0003676; GO:0004523; GO:0004842; GO:0016567
TE_homo_122525	-4.87424	0.00200865	Fvb6:39661077-39661286	Fvb6	39656941	39660856	FvH4_6g54271	-	221	Upstream TSS	0.420339	0.0796692	AT3G26730.1 | RING/U-box superfamily protein | Chr3:9823770-9827270 FORWARD LENGTH=772 | 201606; PREDICTED: RING finger protein 10 [Fragaria vesca subsp. vesca]; sp|Q32NQ8|RNF10_XENLA RING finger protein 10 OS=Xenopus laevis OX=8355 GN=rnf10 PE=2 SV=1; tr|A0A2P6S6N8|A0A2P6S6N8_ROSCH Putative transcription factor C2H2 family OS=Rosa chinensis OX=74649 GN=RchiOBHm_Chr2g0176461 PE=4 SV=1	disorder_prediction; FAMILY NOT NAMED; FvH4_6g54271.t1_v4.0.a2; Mag2/Rnf10; metal ion binding; RING-HC_RNF10; RING/U-box; zf-C3HC4; ZF_RING_1; ZF_RING_2; Znf_C3HC4_RING-type; Znf_RING; Znf_RING_CS; Znf_RING/FYVE/PHD	metal ion binding	GO:0046872
TE_struc_2495	-4.82008	0.0328032	Fvb6:5925749-5926137	Fvb6	5928648	5929566	FvH4_6g09980	-	2512	Downstream TTS	-2.52389	0.00143917	AT5G59320.1 | lipid transfer protein 3 | Chr5:23929051-23929492 FORWARD LENGTH=115 | 201606; PREDICTED: non-specific lipid-transfer protein 1-like isoform X1 [Fragaria vesca subsp. vesca]; sp|Q9M5X8|NLTP_PRUAV Non-specific lipid-transfer protein OS=Prunus avium OX=42229 PE=1 SV=1; tr|Q0Z8V0|Q0Z8V0_RUBID Non-specific lipid-transfer protein OS=Rubus idaeus OX=32247 PE=2 SV=1	Bifunc_inhib/LTP/seed_store; Bifunctional inhibitor/lipid-transfer protein/seed storage 2S albumin; Bifun_inhib/LTP/seed_sf; FAMILY NOT NAMED; FvH4_6g09980.t1_v4.0.a2; lipid binding; lipid transport; LIPIDTRNSFER; NON-SPECIFIC LIPID-TRANSFER PROTEIN 11; nsLTP1; Plant_LTP; PLANT_LTP; Tryp_alpha_amyl	lipid binding; lipid transport	GO:0006869; GO:0008289
TE_homo_66930	-4.45627	0.0225235	Fvb4:11125547-11125654	Fvb4	11128172	11132827	FvH4_4g09390	+	2519	Upstream TSS	-1.6641	5.43657e-06	AT4G19830.1 | FKBP-like peptidyl-prolyl cis-trans isomerase family protein | Chr4:10772579-10773933 REVERSE LENGTH=229 | 201606; PREDICTED: peptidyl-prolyl cis-trans isomerase FKBP17-1, chloroplastic [Fragaria vesca subsp. vesca] &gt;gi|764644692|ref|XP_011457392.1| PREDICTED: peptidyl-prolyl cis-trans isomerase FKBP17-1, chloroplastic [Fragaria vesca subsp. vesca]; sp|O81864|FK171_ARATH Peptidyl…	FAMILY NOT NAMED; FKBP_C; FKBP-like; FKBP_PPIASE; FvH4_4g09390.t1_v4.0.a2; FvH4_4g09390.t2_v4.0.a2; peptidyl-prolyl cis-trans isomerase activity; PPIase_FKBP_dom	peptidyl-prolyl cis-trans isomerase activity	GO:0003755
TE_homo_9639	-4.39664	0.0282852	Fvb1:18452299-18452891	Fvb1	18453198	18458596	FvH4_1g26620	+	308	Upstream TSS	-0.52434	0.609695	AT3G62270.1 | HCO3- transporter family | Chr3:23042528-23045633 REVERSE LENGTH=703 | 201606; PREDICTED: boron transporter 1 [Fragaria vesca subsp. vesca]; sp|Q9M1P7|BOR2_ARATH Probable boron transporter 2 OS=Arabidopsis thaliana OX=3702 GN=BOR2 PE=2 SV=1; tr|A0A2P6RFE4|A0A2P6RFE4_ROSCH Putative bicarbonate transporter OS=Rosa chinensis OX=74649 GN=RchiOBHm_Chr3g0486761 PE=4 SV=1	ANION EXCHANGE PROTEIN; anion transport; Bicarbonate transporters; BORON TRANSPORTER 2-RELATED; disorder_prediction; FvH4_1g26620.t1_v4.0.a2; FvH4_1g26620.t4_v4.0.a2; HCO3_cotransp; HCO3_transpt_C; HCO3_transpt_euk; inorganic anion exchanger activity; integral component of membrane; membrane	integral to membrane; membrane; monoatomic anion transport; solute:inorganic anion antiporter activity	GO:0005452; GO:0006820; GO:0016020; GO:0016021
TE_struc_686	-4.38914	1.70395e-05	Fvb2:21867454-21867633	Fvb2	21868179	21869781	FvH4_2g27610	+	547	Upstream TSS	4.6424	0.0771484	AT5G59670.2 | Leucine-rich repeat protein kinase family protein | Chr5:24041538-24045478 FORWARD LENGTH=868 | 201606; putative leucine-rich repeat receptor-like serine/threonine-protein kinase [Quercus suber]; sp|Q9FN94|RLK0_ARATH Receptor-like protein kinase At5g59670 OS=Arabidopsis thaliana OX=3702 GN=At5g59670 PE=1 SV=1; tr|A0A2P4MN24|A0A2P4MN24_QUESU Putative leucine-rich repeat receptor-like…	ATP binding; FAMILY NOT NAMED; FvH4_2g27610.t1_v4.0.a2; Kinase-like_dom_sf; Pkinase_Tyr; protein kinase activity; PROTEIN_KINASE_DOM; Protein kinase-like (PK-like); protein phosphorylation; Prot_kinase_dom; Ser-Thr/Tyr_kinase_cat_dom;	ATP binding; protein kinase activity; protein phosphorylation	GO:0004672; GO:0005524; GO:0006468
TE_struc_686	-4.38914	1.70395e-05	Fvb2:21867454-21867633	Fvb2	21863222	21867167	FvH4_2g27592	+	287	Downstream TTS	NA	NA	PREDICTED: uncharacterized protein LOC101304350 [Fragaria vesca subsp. vesca] &gt;gi|764540208|ref|XP_011459055.1| PREDICTED: uncharacterized protein LOC101304350 [Fragaria vesca subsp. vesca]	disorder_prediction; FvH4_2g27592.t1_v4.0.a2	NA	NA
TE_struc_686	-4.38914	1.70395e-05	Fvb2:21867454-21867633	Fvb2	21870283	21873380	FvH4_2g27620	-	2651	Downstream TTS	-3.1335	1.04947e-26	AT1G21680.1 | DPP6 N-terminal domain-like protein | Chr1:7613028-7615148 FORWARD LENGTH=706 | 201606; PREDICTED: uncharacterized protein LOC101292474 [Fragaria vesca subsp. vesca]; sp|Q6NAR1|TOLB_RHOPA Tol-Pal system protein TolB OS=Rhodopseudomonas palustris (strain ATCC BAA-98 / CGA009) OX=258594 GN=tolB PE=3 SV=1; tr|A0A2P6PXE3|A0A2P6PXE3_ROSCH Putative transcription factor WD40-like family OS…	6-blade_b-propeller_TolB-like; DPP6 N-terminal domain-like; DPP6 N-TERMINAL DOMAIN-LIKE PROTEIN; FAMILY NOT NAMED; FvH4_2g27620.t1_v4.0.a2; PD40	NA	NA
TE_struc_3004	-4.32752	8.84288e-12	Fvb6:37157053-37157471	Fvb6	37152196	37154331	FvH4_6g49640	+	2722	Downstream TTS	-1.81883	3.11088e-05	PREDICTED: uncharacterized protein LOC101309469 [Fragaria vesca subsp. vesca]; tr|A0A2P6R0N7|A0A2P6R0N7_ROSCH Putative F-box domain-containing protein OS=Rosa chinensis OX=74649 GN=RchiOBHm_Chr4g0430971 PE=4 SV=1	DUF295; FAMILY NOT NAMED; F-box; F-box_dom; F-box domain; F-box-like_dom_sf; FvH4_6g49640.t1_v4.0.a2; FvH4_6g49640.t2_v4.0.a2; protein binding;	protein binding	GO:0005515
TE_struc_3004	-4.32752	8.84288e-12	Fvb6:37157053-37157471	Fvb6	37158218	37161537	FvH4_6g49660	-	748	Downstream TTS	-0.104315	0.873462	AT1G59650.1 | CW14 protein (DUF1336) | Chr1:21920099-21922670 FORWARD LENGTH=492 | 201606; PREDICTED: uncharacterized protein LOC101303718 [Fragaria vesca subsp. vesca]; sp|F4JSE7|EDR2_ARATH Protein ENHANCED DISEASE RESISTANCE 2 OS=Arabidopsis thaliana OX=3702 GN=EDR2 PE=2 SV=1; tr|A0A2P6S4X5|A0A2P6S4X5_ROSCH Uncharacterized protein OS=Rosa chinensis OX=74649 GN=RchiOBHm_Chr2g0169681 PE=4 SV=1	disorder_prediction; DUF1336; EDR2_C; FAMILY NOT NAMED; FvH4_6g49660.t1_v4.0.a2;	NA	NA
TE_homo_3716	-4.24554	0.0241328	Fvb1:9038831-9039273	Fvb1	9040926	9043906	FvH4_1g15890	+	1654	Upstream TSS	-0.53426	0.372915	AT3G58880.1 | F-box/RNI-like superfamily protein | Chr3:21768485-21770167 REVERSE LENGTH=454 | 201606; PREDICTED: FBD-associated F-box protein At4g10400-like isoform X3 [Fragaria vesca subsp. vesca]; sp|Q9LXR4|FBL56_ARATH Putative F-box/LRR-repeat protein At3g58880 OS=Arabidopsis thaliana OX=3702 GN=At3g58880 PE=4 SV=1; tr|A0A2P6RND3|A0A2P6RND3_ROSCH Putative F-box domain, FBD domain, leucine-ric…	FAMILY NOT NAMED; F-box; F-box_dom; F-box domain; F-box-like_dom_sf; FvH4_1g15890.t1_v4.0.a2; L domain-like; LRR_dom_sf; protein binding;	protein binding	GO:0005515
TE_homo_3716	-4.24554	0.0241328	Fvb1:9038831-9039273	Fvb1	9034793	9037427	FvH4_1g15880	+	1404	Downstream TTS	-0.121536	0.74745	AT2G42730.1 | F-box/FBD/LRR protein | Chr2:17789606-17791218 REVERSE LENGTH=457 | 201606; PREDICTED: F-box/LRR-repeat protein At3g58900-like isoform X1 [Fragaria vesca subsp. vesca]; sp|Q0WR05|FBL39_ARATH F-box/LRR-repeat protein At2g42730 OS=Arabidopsis thaliana OX=3702 GN=At2g42730 PE=2 SV=1; tr|A0A2P6RND3|A0A2P6RND3_ROSCH Putative F-box domain, FBD domain, leucine-rich repeat domain, L domain-…	FAMILY NOT NAMED; FBD; F-box; FBOX; F-box_dom; F-box domain; F-box-like_dom_sf; FvH4_1g15880.t1_v4.0.a2; LRR_dom_sf; protein binding; RNI-like;	protein binding	GO:0005515
TE_homo_25404	-4.22804	0.0240344	Fvb2:15003402-15003767	Fvb2	14999678	15003271	FvH4_2g17370	-	131	Upstream TSS	1.39769	0.000127007	AT5G48370.2 | Thioesterase/thiol ester dehydrase-isomerase superfamily protein | Chr5:19598666-19600512 REVERSE LENGTH=437 | 201606; PREDICTED: acyl-coenzyme A thioesterase 9, mitochondrial [Fragaria vesca subsp. vesca]; sp|Q9Y305|ACOT9_HUMAN Acyl-coenzyme A thioesterase 9, mitochondrial OS=Homo sapiens OX=9606 GN=ACOT9 PE=1 SV=2; tr|A0A2P6PTP0|A0A2P6PTP0_ROSCH Putative thiolester hydrolase OS=Ro…	ACYL-COA THIOESTERASE; BFIT_BACH; FvH4_2g17370.t1_v4.0.a2; HOTDOG_ACOT; HotDog_dom_sf; Mitochondrial Fatty Acid Beta-Oxidation; ; Thioesterase/thiol ester dehydrase-isomerase	NA	NA
TE_homo_25404	-4.22804	0.0240344	Fvb2:15003402-15003767	Fvb2	15005190	15008520	FvH4_2g17380	-	1424	Downstream TTS	-2.99369	0.00044499	PREDICTED: uncharacterized protein LOC101311209 isoform X2 [Fragaria vesca subsp. vesca]; tr|A0A2P6PTN8|A0A2P6PTN8_ROSCH Putative P-loop containing nucleoside triphosphate hydrolase, leucine-rich repeat domain, L OS=Rosa chinensis OX=74649 GN=RchiOBHm_Chr6g0282051 PE=3 SV=1	FAMILY NOT NAMED; FvH4_2g17380.t1_v4.0.a2; LRR_dom_sf; RNI-like;	NA	NA
TE_struc_2080	-4.17608	0.0454628	Fvb5:11561359-11561745	Fvb5	11557953	11558690	FvH4_5g19730	+	2669	Downstream TTS	NA	NA	AT1G47960.2 | cell wall / vacuolar inhibitor of fructosidase 1 | Chr1:17682425-17683516 REVERSE LENGTH=166 | 201606; PREDICTED: pectinesterase inhibitor-like [Fragaria vesca subsp. vesca]; sp|P83326|PMEI_ACTDE Pectinesterase inhibitor OS=Actinidia deliciosa OX=3627 GN=PMEI PE=1 SV=2; tr|A0A251PUK8|A0A251PUK8_PRUPE Uncharacterized protein OS=Prunus persica OX=3760 GN=PRUPE_3G007900 PE=4 SV=1	enzyme inhibitor activity; FAMILY NOT NAMED; FvH4_5g19730.t1_v4.0.a2; Invertase/methylesterase_inhib; Pectinesterase_inhib_dom; Plant invertase/pectin methylesterase inhibitor; PMEI; PMEI_like; ; TIGR01614	enzyme inhibitor activity	GO:0004857
TE_homo_111556	-3.82454	0.0162926	Fvb6:20368931-20369073	Fvb6	20366235	20367033	FvH4_6g26673	-	1898	Upstream TSS	NA	NA	NA	FvH4_6g26673.t1_v4.0.a2	NA	NA
TE_homo_4029	-3.74296	0.00813005	Fvb1:9745096-9745276	Fvb1	9742600	9743919	FvH4_1g16820	-	1177	Upstream TSS	NA	NA	hypothetical protein F511_19195 [Dorcoceras hygrometricum]; tr|A0A2Z7AH43|A0A2Z7AH43_9LAMI Uncharacterized protein OS=Dorcoceras hygrometricum OX=472368 GN=F511_19195 PE=4 SV=1	disorder_prediction; FAMILY NOT NAMED; FvH4_1g16820.t1_v4.0.a2;	NA	NA
TE_homo_4029	-3.74296	0.00813005	Fvb1:9745096-9745276	Fvb1	9745631	9747387	FvH4_1g16821	+	356	Upstream TSS	NA	NA	NA	FvH4_1g16821.t1_v4.0.a2	NA	NA
TE_homo_4029	-3.74296	0.00813005	Fvb1:9745096-9745276	Fvb1	9747628	9748885	FvH4_1g16830	-	2353	Downstream TTS	NA	NA	AT4G37290.1 | transmembrane protein | Chr4:17549929-17550183 REVERSE LENGTH=84 | 201606; hypothetical protein RchiOBHm_Chr1g0340091 [Rosa chinensis]; tr|A0A2P6SDE2|A0A2P6SDE2_ROSCH Uncharacterized protein OS=Rosa chinensis OX=74649 GN=RchiOBHm_Chr1g0340091 PE=4 SV=1	disorder_prediction; FAMILY NOT NAMED; FvH4_1g16830.t1_v4.0.a2	NA	NA
TE_homo_91389	-3.6717	0.0301992	Fvb5:18777272-18777607	Fvb5	18778985	18779672	FvH4_5g27530	-	1379	Downstream TTS	-0.9008	0.316288	PREDICTED: uncharacterized protein LOC105351964 [Fragaria vesca subsp. vesca]; tr|A0A2P6QFX2|A0A2P6QFX2_ROSCH Uncharacterized protein OS=Rosa chinensis OX=74649 GN=RchiOBHm_Chr5g0053551 PE=4 SV=1	Coil; FvH4_5g27530.t1_v4.0.a2	NA	NA
TE_homo_56963	-3.60497	0.00356986	Fvb3:36478138-36478470	Fvb3	36473796	36475577	FvH4_3g43752	-	2561	Upstream TSS	-0.516378	0.946912	putative F-box domain-containing protein [Rosa chinensis]; tr|A0A2P6RJ68|A0A2P6RJ68_ROSCH Putative F-box domain-containing protein OS=Rosa chinensis OX=74649 GN=RchiOBHm_Chr2g0089331 PE=4 SV=1	disorder_prediction; FvH4_3g43752.t1_v4.0.a2	NA	NA
TE_homo_56963	-3.60497	0.00356986	Fvb3:36478138-36478470	Fvb3	36480264	36481155	FvH4_3g43760	+	1795	Upstream TSS	NA	NA	NA	disorder_prediction; FvH4_3g43760.t1_v4.0.a2	NA	NA
TE_homo_56963	-3.60497	0.00356986	Fvb3:36478138-36478470	Fvb3	36475633	36477614	FvH4_3g43753	+	524	Downstream TTS	NA	NA	AT5G02820.1 | Spo11/DNA topoisomerase VI%2C subunit A protein | Chr5:642658-644123 FORWARD LENGTH=427 | 201606; PREDICTED: DNA topoisomerase 6 subunit A-like [Fragaria vesca subsp. vesca]; sp|Q9LZ03|TOP6A_ARATH DNA topoisomerase 6 subunit A OS=Arabidopsis thaliana OX=3702 GN=TOP6A PE=1 SV=1; tr|A0A2P6RIA0|A0A2P6RIA0_ROSCH Putative DNA topoisomerase (ATP-hydrolyzing) OS=Rosa chinensis OX=74649 GN=…	chromosome; Coil; disorder_prediction; DNA binding; DNA catabolic process, endonucleolytic; DNA topoisomerase IV, alpha subunit; endodeoxyribonuclease activity, producing 3'-phosphomonoesters; FvH4_3g43753.t1_v4.0.a2; Meiotic recombination; MEIOTIC RECOMBINATION PROTEIN SPO11; Spo11/TopoVI_A; Spo11/TopoVI_A_sf; TOP6AFAMILY; TOPRIM_Topo6A/Spo11; TOPRIM_TopoIIB_SPO	chromosome; DNA binding; DNA endonuclease activity, producing 3'-phosphomonoesters; obsolete DNA catabolic process, endonucleolytic	GO:0000737; GO:0003677; GO:0005694; GO:0016889
TE_homo_56963	-3.60497	0.00356986	Fvb3:36478138-36478470	Fvb3	36481427	36483401	FvH4_3g43770	-	2958	Downstream TTS	NA	NA	putative F-box domain-containing protein [Rosa chinensis]; tr|A0A2P6RJ68|A0A2P6RJ68_ROSCH Putative F-box domain-containing protein OS=Rosa chinensis OX=74649 GN=RchiOBHm_Chr2g0089331 PE=4 SV=1	disorder_prediction; FAMILY NOT NAMED; F-box; FBOX; F-box_dom; F-box domain; F-box-like_dom_sf; FvH4_3g43770.t1_v4.0.a2; protein binding;	protein binding	GO:0005515
TE_homo_122464	-3.55504	7.89736e-05	Fvb6:39527198-39527691	Fvb6	39522749	39526586	FvH4_6g54080	-	612	Upstream TSS	2.04932	0.331807	AT5G14020.5 | Endosomal targeting BRO1-like domain-containing protein | Chr5:4523730-4525819 REVERSE LENGTH=401 | 201606; PREDICTED: uncharacterized protein LOC101309864 [Fragaria vesca subsp. vesca]; tr|A0A2P6S6Q2|A0A2P6S6Q2_ROSCH Putative BRO1 domain-containing protein OS=Rosa chinensis OX=74649 GN=RchiOBHm_Chr2g0176271 PE=4 SV=1	BRO1_Alix_like; BRO1_sf; BROX; disorder_prediction; ENDOSOMAL TARGETING BRO1-LIKE DOMAIN-CONTAINING PROTEIN; FvH4_6g54080.t1_v4.0.a2; FvH4_6g54080.t2_v4.0.a2; FvH4_6g54080.t3_v4.0.a2; UNCHARACTERIZED	NA	NA
TE_homo_122464	-3.55504	7.89736e-05	Fvb6:39527198-39527691	Fvb6	39527811	39528949	FvH4_6g54090	-	121	Downstream TTS	2.49405	1.99482e-06	PREDICTED: uncharacterized protein LOC101299315 [Fragaria vesca subsp. vesca]; tr|A0A2P6Q2R2|A0A2P6Q2R2_ROSCH Uncharacterized protein OS=Rosa chinensis OX=74649 GN=RchiOBHm_Chr5g0003461 PE=4 SV=1	FvH4_6g54090.t1_v4.0.a2	NA	NA
TE_homo_88651	-3.51739	0.0163537	Fvb5:15085479-15085908	Fvb5	15082227	15084233	FvH4_5g23770	+	1246	Downstream TTS	-0.401427	0.472752	AT3G53150.1 | UDP-glucosyl transferase 73D1 | Chr3:19697736-19699286 REVERSE LENGTH=516 | 201606; PREDICTED: scopoletin glucosyltransferase-like [Fragaria vesca subsp. vesca]; sp|Q9AT54|SCGT_TOBAC Scopoletin glucosyltransferase OS=Nicotiana tabacum OX=4097 GN=TOGT1 PE=1 SV=1; tr|A0A387IZT7|A0A387IZT7_FRAAN UDP-glucose glucosyltransferase OS=Fragaria ananassa OX=3747 GN=UGT95B3 PE=2 SV=1	disorder_prediction; FvH4_5g23770.t1_v4.0.a2; GLUCOSYL/GLUCURONOSYL TRANSFERASES; Glucuronidation; transferase activity, transferring hexosyl groups; UDP_glucos_trans; UDP-Glycosyltransferase/glycogen phosphorylase; UDPGT	hexosyltransferase activity	GO:0016758
TE_homo_88651	-3.51739	0.0163537	Fvb5:15085479-15085908	Fvb5	15084286	15085280	FvH4_5g23771	+	199	Downstream TTS	-5.31732	1.65084e-05	PREDICTED: scopoletin glucosyltransferase-like [Fragaria vesca subsp. vesca]; tr|A0A2P6PAY0|A0A2P6PAY0_ROSCH Putative hexosyltransferase OS=Rosa chinensis OX=74649 GN=RchiOBHm_Chr7g0213141 PE=4 SV=1	disorder_prediction; FvH4_5g23771.t1_v4.0.a2	NA	NA
TE_homo_88651	-3.51739	0.0163537	Fvb5:15085479-15085908	Fvb5	15088703	15090521	FvH4_5g23772	-	2796	Downstream TTS	NA	NA	NA	FvH4_5g23772.t1_v4.0.a2	NA	NA
TE_homo_40841	-3.28668	0.0225235	Fvb3:16112295-16112455	Fvb3	16112707	16119039	FvH4_3g22980	-	253	Downstream TTS	0.552083	0.0178902	AT5G55040.2 | DNA-binding bromodomain-containing protein | Chr5:22327727-22331703 REVERSE LENGTH=916 | 201606; PREDICTED: uncharacterized protein LOC101311740 [Fragaria vesca subsp. vesca]; sp|Q9ULD4|BRPF3_HUMAN Bromodomain and PHD finger-containing protein 3 OS=Homo sapiens OX=9606 GN=BRPF3 PE=1 SV=2; tr|A0A2P6QCI0|A0A2P6QCI0_ROSCH Putative chromatin remodeler Bromodomain family OS=Rosa chinensi…	Bromodomain; BROMODOMAIN; BROMODOMAIN_1; BROMODOMAIN_2; BROMODOMAIN CONTAINING PROTEIN; Bromodomain_CS; Bromodomain-like_sf; Coil; disorder_prediction; FvH4_3g22980.t1_v4.0.a2; protein binding; SWI/SNF NUCLEOSOME REMODELING COMPLEX COMPONENT	protein binding	GO:0005515
TE_homo_118003	-3.27511	0.00139121	Fvb6:29854215-29854617	Fvb6	29856822	29861175	FvH4_6g37900	-	2206	Downstream TTS	0.241651	0.511032	AT1G17680.3 | tetratricopeptide repeat (TPR)-containing protein | Chr1:6076388-6082160 FORWARD LENGTH=896 | 201606; sp|Q9Y5Q9|TF3C3_HUMAN General transcription factor 3C polypeptide 3 OS=Homo sapiens OX=9606 GN=GTF3C3 PE=1 SV=1; tr|A0A2P6S029|A0A2P6S029_ROSCH Putative acetyltransferase A, auxiliary subunit OS=Rosa chinensis OX=74649 GN=RchiOBHm_Chr2g0151101 PE=4 SV=1; transcription factor tau sub…	Coil; disorder_prediction; FvH4_6g37900.t1_v4.0.a2; FvH4_6g37900.t2_v4.0.a2; FvH4_6g37900.t4_v4.0.a2; FvH4_6g37900.t5_v4.0.a2; protein binding; RNA Polymerase III Abortive And Retractive Initiation; RNA Polymerase III Transcription Initiation From Type 1 Promoter; RNA Polymerase III Transcription Initiation From Type 2 Promoter; RNA polymerase III transcription regulator recruiting activity; Tfc4…	obsolete RNA polymerase III transcription regulator recruiting activity; protein binding; transcription by RNA polymerase III	GO:0001004; GO:0005515; GO:0006383
TE_struc_2271	-3.17175	9.32766e-06	Fvb5:23393167-23393601	Fvb5	23387949	23390994	FvH4_5g32410	+	2173	Downstream TTS	0.401153	0.64827	AT1G25360.1 | Pentatricopeptide repeat (PPR) superfamily protein | Chr1:8894428-8896800 FORWARD LENGTH=790 | 201606; PREDICTED: pentatricopeptide repeat-containing protein At1g25360 [Fragaria vesca subsp. vesca]; sp|Q9FRI5|PPR57_ARATH Pentatricopeptide repeat-containing protein At1g25360 OS=Arabidopsis thaliana OX=3702 GN=PCMP-H74 PE=2 SV=1; tr|A0A2P6PD27|A0A2P6PD27_ROSCH Putative tetratricopepti…	DYW_deaminase; DYW_dom; FAMILY NOT NAMED; FvH4_5g32410.t1_v4.0.a2; Pentatricopeptide_repeat; PPR; PPR_2; protein binding; TIGR00756; TPR-like; TPR-like_helical_dom_sf; zinc ion binding	protein binding; zinc ion binding	GO:0005515; GO:0008270
TE_homo_6336	-3.02116	0.0326031	Fvb1:13495682-13495982	Fvb1	13498952	13506721	FvH4_1g21510	-	2971	Downstream TTS	NA	NA	AT1G47710.1 | Serine protease inhibitor (SERPIN) family protein | Chr1:17558271-17560061 FORWARD LENGTH=391 | 201606; PREDICTED: serpin-ZX-like [Fragaria vesca subsp. vesca]; sp|Q9S7T8|SPZX_ARATH Serpin-ZX OS=Arabidopsis thaliana OX=3702 GN=At1g47710 PE=1 SV=1; tr|A0A2P6RSN3|A0A2P6RSN3_ROSCH Putative Serpin family protein OS=Rosa chinensis OX=74649 GN=RchiOBHm_Chr2g0122001 PE=3 SV=1	extracellular space; FvH4_1g21510.t1_v4.0.a2; RING/U-box; SERINE PROTEASE INHIBITOR, SERPIN; Serpin; SERPIN; Serpin_CS; Serpin_dom; Serpin_fam; Serpins; Serpin_sf; Serpin_sf_2; ; ZF_RING_2; Znf_RING; Znf_RING/FYVE/PHD	extracellular space	GO:0005615
TE_homo_87558	-3.00687	9.67669e-07	Fvb5:13365820-13366228	Fvb5	13368134	13368527	FvH4_5g21990	-	1907	Downstream TTS	1.4798	0.19684	AT2G35290.1 | hypothetical protein | Chr2:14861635-14862000 REVERSE LENGTH=121 | 201606; PREDICTED: uncharacterized protein LOC101309055 [Fragaria vesca subsp. vesca]; tr|A0A2P6P9Z0|A0A2P6P9Z0_ROSCH Uncharacterized protein OS=Rosa chinensis OX=74649 GN=RchiOBHm_Chr7g0209491 PE=4 SV=1	FAMILY NOT NAMED; FvH4_5g21990.t1_v4.0.a2;	NA	NA
TE_homo_133707	-2.94963	0.0162978	Fvb7:21007452-21007752	Fvb7	21007817	21016934	FvH4_7g28350	+	66	Upstream TSS	-1.43249	4.54464e-10	AT2G44890.1 | cytochrome P450%2C family 704%2C subfamily A%2C polypeptide 1 | Chr2:18508392-18510308 REVERSE LENGTH=511 | 201606; PREDICTED: cytochrome P450 704C1-like [Fragaria vesca subsp. vesca]; sp|Q50EK3|C04C1_PINTA Cytochrome P450 704C1 OS=Pinus taeda OX=3352 GN=CYP704C1 PE=2 SV=1; tr|A0A2P6SMM1|A0A2P6SMM1_ROSCH Putative abieta-7,13-dien-18-ol hydroxylase OS=Rosa chinensis OX=74649 GN=RchiO…	Cytochrome P450; CYTOCHROME_P450; Cyt_P450; Cyt_P450_CS; Cyt_P450_E_grp-I; Cyt_P450_sf; EP450I; FAMILY NOT NAMED; FvH4_7g28350.t1_v4.0.a2; heme binding; iron ion binding; oxidation-reduction process; oxidoreductase activity, acting on paired donors, with incorporation or reduction of molecular oxygen; p450; P450;	heme binding; iron ion binding; obsolete oxidation-reduction process; oxidoreductase activity, acting on paired donors, with incorporation or reduction of molecular oxygen	GO:0005506; GO:0016705; GO:0020037; GO:0055114
TE_homo_133707	-2.94963	0.0162978	Fvb7:21007452-21007752	Fvb7	21003621	21005653	FvH4_7g28340	+	1799	Downstream TTS	6.8307	3.34996e-05	AT2G45510.1 | cytochrome P450%2C family 704%2C subfamily A%2C polypeptide 2 | Chr2:18753085-18754944 FORWARD LENGTH=511 | 201606; PREDICTED: cytochrome P450 704C1-like [Fragaria vesca subsp. vesca]; sp|Q50EK3|C04C1_PINTA Cytochrome P450 704C1 OS=Pinus taeda OX=3352 GN=CYP704C1 PE=2 SV=1; tr|A0A2P6SMM1|A0A2P6SMM1_ROSCH Putative abieta-7,13-dien-18-ol hydroxylase OS=Rosa chinensis OX=74649 GN=RchiO…	Coil; Cytochrome P450; CYTOCHROME_P450; Cyt_P450; Cyt_P450_CS; Cyt_P450_E_grp-I; Cyt_P450_sf; EP450I; FAMILY NOT NAMED; FvH4_7g28340.t1_v4.0.a2; heme binding; iron ion binding; oxidation-reduction process; oxidoreductase activity, acting on paired donors, with incorporation or reduction of molecular oxygen; p450; P450;	heme binding; iron ion binding; obsolete oxidation-reduction process; oxidoreductase activity, acting on paired donors, with incorporation or reduction of molecular oxygen	GO:0005506; GO:0016705; GO:0020037; GO:0055114
TE_homo_1146	-2.86254	0.00756486	Fvb1:3135269-3135613	Fvb1	3137000	3137414	FvH4_1g05892	+	1388	Upstream TSS	NA	NA	tr|A0A2P6RVR3|A0A2P6RVR3_ROSCH Putative F-box domain-containing protein OS=Rosa chinensis OX=74649 GN=RchiOBHm_Chr2g0133991 PE=4 SV=1	disorder_prediction; F-box domain; F-box-like_dom_sf; FvH4_1g05892.t1_v4.0.a2; protein binding	protein binding	GO:0005515
TE_homo_1146	-2.86254	0.00756486	Fvb1:3135269-3135613	Fvb1	3137438	3138524	FvH4_1g05900	+	1826	Upstream TSS	NA	NA	AT5G67040.1 | F-box protein%2C putative (DUF295) | Chr5:26757896-26758475 REVERSE LENGTH=165 | 201606; F-box protein At2g26160-like [Rosa chinensis]; tr|A0A2P6RK12|A0A2P6RK12_ROSCH Putative F-box domain-containing protein OS=Rosa chinensis OX=74649 GN=RchiOBHm_Chr2g0092531 PE=4 SV=1	DUF295; FAMILY NOT NAMED; FvH4_1g05900.t1_v4.0.a2;	NA	NA
TE_homo_1146	-2.86254	0.00756486	Fvb1:3135269-3135613	Fvb1	3138527	3146506	FvH4_1g05910	-	2915	Downstream TTS	0.889008	0.000459925	AT2G20000.1 | CDC27 family protein | Chr2:8632324-8636900 REVERSE LENGTH=744 | 201606; PREDICTED: cell division cycle protein 27 homolog B isoform X2 [Fragaria vesca subsp. vesca]; sp|Q8LGU6|CD27B_ARATH Cell division cycle protein 27 homolog B OS=Arabidopsis thaliana OX=3702 GN=CDC27B PE=1 SV=1; tr|A0A2P6RJR5|A0A2P6RJR5_ROSCH Putative 43kDa postsynaptic protein OS=Rosa chinensis OX=74649 GN=RchiO…	ANAPC3; CELL DIVISION CYCLE 16,23,27; disorder_prediction; FvH4_1g05910.t1_v4.0.a2; protein binding; ; TPR; TPR_1; TPR_16; TPR_19; TPR_2; TPR-contain_dom; TPR-like; TPR-like_helical_dom_sf; TPR_REGION; TPR_repeat	protein binding	GO:0005515
TE_homo_90920	-2.76606	0.0272449	Fvb5:18051852-18051992	Fvb5	18048279	18049657	FvH4_5g26600	+	2195	Downstream TTS	0.844743	0.292383	AT1G76600.1 | poly polymerase | Chr1:28746975-28747625 FORWARD LENGTH=216 | 201606; PREDICTED: uncharacterized protein LOC101307793 [Fragaria vesca subsp. vesca]; tr|A0A2P6PC23|A0A2P6PC23_ROSCH Uncharacterized protein OS=Rosa chinensis OX=74649 GN=RchiOBHm_Chr7g0217541 PE=4 SV=1	DUF4228; DUF4228_plant; FAMILY NOT NAMED; FvH4_5g26600.t1_v4.0.a2; POLY POLYMERASE	NA	NA
TE_homo_4768	-2.66881	0.00736118	Fvb1:11274552-11274971	Fvb1	11264095	11271834	FvH4_1g19010	+	2718	Downstream TTS	-2.34343	7.42543e-12	AT1G67720.1 | Leucine-rich repeat protein kinase family protein | Chr1:25386494-25390856 FORWARD LENGTH=929 | 201606; PREDICTED: nodulation receptor kinase-like [Fragaria vesca subsp. vesca]; sp|Q8LKZ1|NORK_PEA Nodulation receptor kinase OS=Pisum sativum OX=3888 GN=NORK PE=1 SV=1; tr|A0A314Y5W9|A0A314Y5W9_PRUYE Nodulation receptor kinase OS=Prunus yedoensis var. nudiflora OX=2094558 GN=Pyn_05603 …	ATP binding; disorder_prediction; FAMILY NOT NAMED; FvH4_1g19010.t1_v4.0.a2; Kinase-like_dom_sf; L domain-like; LRR_dom_sf; Malectin_like; Malectin-like_Carb-bd_dom; Pkinase_Tyr; protein kinase activity; PROTEIN_KINASE_ATP; Protein_kinase_ATP_BS; PROTEIN_KINASE_DOM; Protein kinase-like (PK-like); PROTEIN_KINASE_ST; protein phosphorylation; Prot_kinase_dom; Ser/Thr_kinase_AS; Ser-Thr/Tyr_kinase_ca…	ATP binding; protein kinase activity; protein phosphorylation	GO:0004672; GO:0005524; GO:0006468
TE_homo_119665	-2.65509	0.0155701	Fvb6:32671493-32671817	Fvb6	32669699	32670930	FvH4_6g41601	-	563	Upstream TSS	13.5493	1.66878e-07	PREDICTED: elastin-like [Fragaria vesca subsp. vesca]	disorder_prediction; FvH4_6g41601.t1_v4.0.a2	NA	NA
TE_homo_119665	-2.65509	0.0155701	Fvb6:32671493-32671817	Fvb6	32674533	32675212	FvH4_6g41603	+	2717	Upstream TSS	NA	NA	AT2G04030.1 | Chaperone protein htpG family protein | Chr2:1281983-1285909 FORWARD LENGTH=780 | 201606; heat shock protein 90-5, chloroplastic [Rosa chinensis] &gt;gi|1358166061|gb|PRQ40538.1| putative Heat shock protein Hsp90 family [Rosa chinensis]; sp|Q9SIF2|HS905_ARATH Heat shock protein 90-5, chloroplastic OS=Arabidopsis thaliana OX=3702 GN=HSP90-5 PE=1 SV=1; tr|A0A2P6R2A4|A0A2P6R2A4_ROSCH P…	ATP binding; disorder_prediction; FvH4_6g41603.t1_v4.0.a2; HEAT SHOCK PROTEIN 90 FAMILY MEMBER; Hsp90_fam; protein folding; ; unfolded protein binding	ATP binding; protein folding; unfolded protein binding	GO:0005524; GO:0006457; GO:0051082
TE_homo_119665	-2.65509	0.0155701	Fvb6:32671493-32671817	Fvb6	32672531	32673485	FvH4_6g41602	-	715	Downstream TTS	2.54019	0.499549	NA	Coil; disorder_prediction; FvH4_6g41602.t1_v4.0.a2	NA	NA
TE_homo_75233	-2.65341	8.25172e-06	Fvb4:21357230-21357652	Fvb4	21350616	21356798	FvH4_4g17410	-	432	Upstream TSS	1.26748	1.86656e-11	AT5G18610.3 | Protein kinase superfamily protein | Chr5:6192736-6195371 FORWARD LENGTH=513 | 201606; PREDICTED: serine/threonine-protein kinase CDL1 [Fragaria vesca subsp. vesca]; sp|Q1PDV6|PBL27_ARATH Serine/threonine-protein kinase PBL27 OS=Arabidopsis thaliana OX=3702 GN=PBL27 PE=1 SV=1; tr|A0A2P6QYB5|A0A2P6QYB5_ROSCH Uncharacterized protein OS=Rosa chinensis OX=74649 GN=RchiOBHm_Chr4g0421331 …	ATP binding; disorder_prediction; FAMILY NOT NAMED; FvH4_4g17410.t1_v4.0.a2; FvH4_4g17410.t2_v4.0.a2; Kinase-like_dom_sf; Pkinase; protein kinase activity; PROTEIN_KINASE_ATP; Protein_kinase_ATP_BS; PROTEIN_KINASE_DOM; Protein kinase-like (PK-like); PROTEIN_KINASE_ST; protein phosphorylation; Prot_kinase_dom; Ser/Thr_kinase_AS; ; STKc_IRAK; TyrPK_CSF1-R	ATP binding; protein kinase activity; protein phosphorylation	GO:0004672; GO:0005524; GO:0006468
TE_homo_83911	-2.60382	0.0378669	Fvb5:6166847-6166996	Fvb5	6163846	6166080	FvH4_5g10880	+	767	Downstream TTS	2.55593	2.22836e-05	AT2G46660.1 | cytochrome P450%2C family 78%2C subfamily A%2C polypeptide 6 | Chr2:19153602-19155417 REVERSE LENGTH=530 | 201606; PREDICTED: cytochrome P450 78A9-like [Fragaria vesca subsp. vesca]; sp|Q9ZNR0|C78A6_ARATH Cytochrome P450 78A6 OS=Arabidopsis thaliana OX=3702 GN=CYP78A6 PE=2 SV=1; tr|A0A2P6P428|A0A2P6P428_ROSCH Putative flavonoid 3'-monooxygenase OS=Rosa chinensis OX=74649 GN=RchiOBHm…	Cytochrome P450; CYTOCHROME_P450; Cyt_P450; Cyt_P450_CS; Cyt_P450_E_grp-I; Cyt_P450_sf; EP450I; FAMILY NOT NAMED; FvH4_5g10880.t1_v4.0.a2; heme binding; iron ion binding; oxidation-reduction process; oxidoreductase activity, acting on paired donors, with incorporation or reduction of molecular oxygen; p450; P450	heme binding; iron ion binding; obsolete oxidation-reduction process; oxidoreductase activity, acting on paired donors, with incorporation or reduction of molecular oxygen	GO:0005506; GO:0016705; GO:0020037; GO:0055114
TE_homo_83911	-2.60382	0.0378669	Fvb5:6166847-6166996	Fvb5	6169786	6173788	FvH4_5g10890	-	2791	Downstream TTS	5.19351	8.90667e-12	AT1G64660.1 | methionine gamma-lyase | Chr1:24028977-24030537 FORWARD LENGTH=441 | 201606; PREDICTED: methionine gamma-lyase [Fragaria vesca subsp. vesca]; sp|Q9SGU9|MGL_ARATH Methionine gamma-lyase OS=Arabidopsis thaliana OX=3702 GN=MGL PE=1 SV=1; tr|A0A2P6P439|A0A2P6P439_ROSCH Putative methionine gamma-lyase OS=Rosa chinensis OX=74649 GN=RchiOBHm_Chr7g0186971 PE=3 SV=1	catalytic activity; CGS; Cys/Met-Metab_PyrdxlP-dep_enz; Cys_Met_Meta_PP; Cysteine formation from homocysteine; Degradation of cysteine and homocysteine; disorder_prediction; FvH4_5g10890.t1_v4.0.a2; FvH4_5g10890.t3_v4.0.a2; Metabolism of ingested SeMet, Sec, MeSec into H2Se; PLP-dependent transferases; PyrdxlP-dep_Trfase; PyrdxlP-dep_Trfase_dom1; PyrdxlP-dep_Trfase_major; pyridoxal phosphate bind…	catalytic activity; pyridoxal phosphate binding	GO:0003824; GO:0030170
TE_homo_134171	-2.55562	0.00358902	Fvb7:22388699-22388867	Fvb7	22378849	22385730	FvH4_7g30870	-	2969	Upstream TSS	4.83927	3.63356e-18	AT3G59140.1 | multidrug resistance-associated protein 14 | Chr3:21863519-21868701 REVERSE LENGTH=1453 | 201606; PREDICTED: ABC transporter C family member 10-like [Fragaria vesca subsp. vesca]; sp|Q9LYS2|AB10C_ARATH ABC transporter C family member 10 OS=Arabidopsis thaliana OX=3702 GN=ABCC10 PE=2 SV=2; tr|A0A2P6SNP7|A0A2P6SNP7_ROSCH Putative xenobiotic-transporting ATPase OS=Rosa chinensis OX=746…	ABC1_TM_dom; ABC1_TM_sf; ABCC_MRP_domain1; ABCC_MRP_domain2; ABC_membrane; ABC_TM1F; ABC_tran; ABC_TRANSPORTER_1; ABC_TRANSPORTER_2; ABC TRANSPORTER C FAMILY MEMBER 10; ABC_transporter_CS; ABC_transporter-like; ABC transporter transmembrane region; ATPase activity; ATPase activity, coupled to transmembrane movement of substances; ATP binding; Coil; FAMILY NOT NAMED; FvH4_7g30870.t1_v4.0.a2; FvH4_…	ATPase-coupled transmembrane transporter activity; ATP binding; ATP hydrolysis activity; integral to membrane; transmembrane transport	GO:0005524; GO:0016021; GO:0016887; GO:0042626; GO:0055085
TE_homo_134171	-2.55562	0.00358902	Fvb7:22388699-22388867	Fvb7	22388994	22393246	FvH4_7g30880	+	128	Upstream TSS	3.17712	8.77267e-09	AT5G53340.1 | Galactosyltransferase family protein | Chr5:21641045-21643195 REVERSE LENGTH=338 | 201606; PREDICTED: probable beta-1,3-galactosyltransferase 11 [Fragaria vesca subsp. vesca]; sp|Q94F27|B3GTB_ARATH Hydroxyproline O-galactosyltransferase HPGT1 OS=Arabidopsis thaliana OX=3702 GN=HPTG1 PE=1 SV=1; tr|A0A2P6SNR1|A0A2P6SNR1_ROSCH Hexosyltransferase OS=Rosa chinensis OX=74649 GN=RchiOBHm_C…	BETA-1,3-N-ACETYLGLUCOSAMINYLTRANSFERASE; Coil; DUF4094; FvH4_7g30880.t1_v4.0.a2; Galactosyl_T; galactosyltransferase activity; Glyco_trans_31; HYDROXYPROLINE O-GALACTOSYLTRANSFERASE HPGT1; membrane; protein glycosylation	galactosyltransferase activity; membrane; protein glycosylation	GO:0006486; GO:0008378; GO:0016020
TE_homo_127442	-2.44464	0.0303711	Fvb7:7922342-7922762	Fvb7	7923648	7925421	FvH4_7g08000	+	887	Upstream TSS	-6.24867	0.289935	AT2G35930.1 | plant U-box 23 | Chr2:15083101-15084336 REVERSE LENGTH=411 | 201606; PREDICTED: E3 ubiquitin-protein ligase PUB23-like [Fragaria vesca subsp. vesca]; sp|Q84TG3|PUB23_ARATH E3 ubiquitin-protein ligase PUB23 OS=Arabidopsis thaliana OX=3702 GN=PUB23 PE=1 SV=1; tr|A0A2P6SDP4|A0A2P6SDP4_ROSCH RING-type E3 ubiquitin transferase OS=Rosa chinensis OX=74649 GN=RchiOBHm_Chr1g0341311 PE=4 SV=1	ARM-like; ARM repeat; ARM-type_fold; FvH4_7g08000.t1_v4.0.a2; protein ubiquitination; Protein ubiquitination; RING/U-box; RING-Ubox_PUB; ; ubiquitin-protein transferase activity; U-box; U_BOX; Ubox_domain; WDSAM1 PROTEIN; Znf_RING/FYVE/PHD	protein ubiquitination; ubiquitin-protein transferase activity	GO:0004842; GO:0016567
TE_homo_127442	-2.44464	0.0303711	Fvb7:7922342-7922762	Fvb7	7909746	7921356	FvH4_7g07990	+	986	Downstream TTS	0.642077	0.0684502	AT5G16210.1 | HEAT repeat-containing protein | Chr5:5290999-5297779 REVERSE LENGTH=1180 | 201606; PREDICTED: lisH domain and HEAT repeat-containing protein KIAA1468 homolog isoform X3 [Fragaria vesca subsp. vesca]; sp|Q08BT5|RELCH_XENTR RAB11-binding protein RELCH homolog OS=Xenopus tropicalis OX=8364 GN=relch PE=2 SV=1; tr|A0A251Q0E5|A0A251Q0E5_PRUPE Uncharacterized protein OS=Prunus persica OX=…	ARM-like; ARM repeat; ARM-type_fold; Coil; disorder_prediction; FAMILY NOT NAMED; FvH4_7g07990.t1_v4.0.a2; HEAT_REPEAT; HEAT_type_2; intracellular cholesterol transport; LisH; LISH; protein binding; RELCH; ; trans-Golgi network	intracellular cholesterol transport; protein binding; trans-Golgi network	GO:0005515; GO:0005802; GO:0032367
TE_homo_82471	-2.40273	0.024586	Fvb5:2885064-2885456	Fvb5	2882278	2884137	FvH4_5g04833	-	927	Upstream TSS	-3.46955	1.24499e-06	AT1G74620.1 | RING/U-box superfamily protein | Chr1:28028252-28029001 FORWARD LENGTH=249 | 201606; PREDICTED: probable E3 ubiquitin-protein ligase HIP1 [Fragaria vesca subsp. vesca] &gt;gi|764581416|ref|XP_011464000.1| PREDICTED: probable E3 ubiquitin-protein ligase HIP1 [Fragaria vesca subsp. vesca]; sp|O43085|DSC1_SCHPO DSC E3 ubiquitin ligase complex subunit 1 OS=Schizosaccharomyces pombe (str…	E3 UBIQUITIN-PROTEIN LIGASE PRAJA; FvH4_5g04833.t1_v4.0.a2; FvH4_5g04833.t2_v4.0.a2; RING/U-box; ; zf-RING_2; ZF_RING_2; Znf_RING; Znf_RING/FYVE/PHD	NA	NA
TE_homo_82471	-2.40273	0.024586	Fvb5:2885064-2885456	Fvb5	2886254	2889563	FvH4_5g04840	-	799	Downstream TTS	-8.88474	0.117276	AT1G64480.3 | calcineurin B-like protein 8 | Chr1:23948028-23949751 REVERSE LENGTH=214 | 201606; PREDICTED: calcineurin B-like protein 7 [Fragaria vesca subsp. vesca] &gt;gi|764581423|ref|XP_011464001.1| PREDICTED: calcineurin B-like protein 7 [Fragaria vesca subsp. vesca] &gt;gi|764581426|ref|XP_011464002.1| PREDICTED: calcineurin B-like protein 7 [Fragaria vesca subsp. vesca]; sp|Q3HRP0|CNBL7_O…	CALCINEURIN B; calcium ion binding; EFh; EF-hand; EF_HAND_2; EF-hand_5; EF-hand_7; EF_hand_dom; EF-hand-dom_pair; FvH4_5g04840.t1_v4.0.a2; FvH4_5g04840.t3_v4.0.a2; FvH4_5g04840.t4_v4.0.a2; RECOVERIN;	calcium ion binding	GO:0005509
TE_homo_59471	-2.37855	0.00429916	Fvb4:2231268-2231579	Fvb4	2227944	2231192	FvH4_4g02430	+	76	Downstream TTS	-11.6663	1.08956e-09	AT3G01680.1 | sieve element occlusion amino-terminus protein | Chr3:252033-255246 FORWARD LENGTH=740 | 201606; PREDICTED: uncharacterized protein LOC101297774 [Fragaria vesca subsp. vesca]; sp|Q9SS87|SEOB_ARATH Protein SIEVE ELEMENT OCCLUSION B OS=Arabidopsis thaliana OX=3702 GN=SEOB PE=1 SV=1; tr|A0A2P6QQ54|A0A2P6QQ54_ROSCH Putative sieve element occlusion OS=Rosa chinensis OX=74649 GN=RchiOBHm_…	FAMILY NOT NAMED; FvH4_4g02430.t1_v4.0.a2; phloem development; SEOA; SEO_C; SEO_N;	phloem development	GO:0010088
TE_homo_59471	-2.37855	0.00429916	Fvb4:2231268-2231579	Fvb4	2231643	2238713	FvH4_4g02431	-	65	Downstream TTS	NA	NA	tr|A0A2P6QC43|A0A2P6QC43_ROSCH Putative ribonuclease H-like domain-containing protein OS=Rosa chinensis OX=74649 GN=RchiOBHm_Chr5g0038961 PE=4 SV=1; uncharacterized protein LOC112164413 [Rosa chinensis]	FAMILY NOT NAMED; FvH4_4g02431.t1_v4.0.a2; nucleic acid binding; POLYNUCLEOTIDYL TRANSFERASE, RIBONUCLEASE H-LIKE SUPERFAMILY PROTEIN; RNA-DNA hybrid ribonuclease activity; RNaseH_domain; RNase_H_like; RVT_3	nucleic acid binding; RNA-DNA hybrid ribonuclease activity	GO:0003676; GO:0004523
TE_homo_64620	-2.33105	0.000901929	Fvb4:8765798-8766032	Fvb4	8767057	8770499	FvH4_4g08570	-	1026	Downstream TTS	-1.40638	0.0671715	AT4G28025.1 | hypothetical protein | Chr4:13935836-13937367 REVERSE LENGTH=157 | 201606; PREDICTED: uncharacterized protein LOC101294646 [Fragaria vesca subsp. vesca]; tr|A0A2P6QU06|A0A2P6QU06_ROSCH Putative chlorophyll a/b binding protein OS=Rosa chinensis OX=74649 GN=RchiOBHm_Chr4g0404651 PE=4 SV=1	Chlorophyll a-b binding protein; FAMILY NOT NAMED; FvH4_4g08570.t1_v4.0.a2; FvH4_4g08570.t2_v4.0.a2	NA	NA
TE_struc_2722	-2.26935	0.0494687	Fvb6:19464470-19465231	Fvb6	19461419	19463172	FvH4_6g25550	+	1298	Downstream TTS	-0.248393	0.844579	NA	FvH4_6g25550.t1_v4.0.a2	NA	NA
TE_homo_31836	-2.18878	0.00610572	Fvb3:582417-582607	Fvb3	578112	579454	FvH4_3g01180	-	2963	Upstream TSS	NA	NA	AT3G25070.2 | RPM1 interacting protein 4 | Chr3:9132891-9133747 FORWARD LENGTH=224 | 201606; PREDICTED: RPM1-interacting protein 4-like [Fragaria vesca subsp. vesca]; sp|Q8GYN5|RIN4_ARATH RPM1-interacting protein 4 OS=Arabidopsis thaliana OX=3702 GN=RIN4 PE=1 SV=1; tr|A0A068UA22|A0A068UA22_COFCA Uncharacterized protein OS=Coffea canephora OX=49390 GN=GSCOC_T00017865001 PE=4 SV=1	AvrRpt-cleavage; disorder_prediction; FAMILY NOT NAMED; FvH4_3g01180.t1_v4.0.a2; RIN4/NOI4; ; TypeIII_avirulence_cleave	NA	NA
TE_homo_31836	-2.18878	0.00610572	Fvb3:582417-582607	Fvb3	583049	583881	FvH4_3g01190	+	443	Upstream TSS	0.996123	0.722991	AT2G18370.1 | Bifunctional inhibitor/lipid-transfer protein/seed storage 2S albumin superfamily protein | Chr2:7980687-7981475 FORWARD LENGTH=116 | 201606; PREDICTED: non-specific lipid-transfer protein 1-like [Fragaria vesca subsp. vesca]; sp|Q0IQK9|NLTP1_ORYSJ Non-specific lipid-transfer protein 1 OS=Oryza sativa subsp. japonica OX=39947 GN=LTP PE=1 SV=1; tr|A0A2P6QEB2|A0A2P6QEB2_ROSCH Putative…	Bifunc_inhib/LTP/seed_store; Bifunctional inhibitor/lipid-transfer protein/seed storage 2S albumin; Bifun_inhib/LTP/seed_sf; FAMILY NOT NAMED; FvH4_3g01190.t1_v4.0.a2; lipid binding; lipid transport; LIPIDTRNSFER; LTP_2; NON-SPECIFIC LIPID-TRANSFER PROTEIN 15-RELATED; nsLTP1; Plant_LTP; PLANT_LTP	lipid binding; lipid transport	GO:0006869; GO:0008289
TE_homo_31836	-2.18878	0.00610572	Fvb3:582417-582607	Fvb3	585319	586022	FvH4_3g01200	+	2713	Upstream TSS	-0.51636	0.911671	AT2G18370.1 | Bifunctional inhibitor/lipid-transfer protein/seed storage 2S albumin superfamily protein | Chr2:7980687-7981475 FORWARD LENGTH=116 | 201606; PREDICTED: non-specific lipid-transfer protein-like [Fragaria vesca subsp. vesca]; sp|Q9ZPW9|NLTP8_ARATH Non-specific lipid-transfer protein 8 OS=Arabidopsis thaliana OX=3702 GN=LTP8 PE=3 SV=1; tr|A0A2P6Q2B9|A0A2P6Q2B9_ROSCH Non-specific lipid…	Bifunc_inhib/LTP/seed_store; Bifunctional inhibitor/lipid-transfer protein/seed storage 2S albumin; Bifun_inhib/LTP/seed_sf; FAMILY NOT NAMED; FvH4_3g01200.t1_v4.0.a2; lipid binding; lipid transport; LIPIDTRNSFER; NON-SPECIFIC LIPID-TRANSFER PROTEIN 15-RELATED; nsLTP1; Plant_LTP; Tryp_alpha_amyl	lipid binding; lipid transport	GO:0006869; GO:0008289
TE_homo_99441	-2.13483	0.0226214	Fvb6:2064620-2064831	Fvb6	2064903	2072453	FvH4_6g03830	+	73	Upstream TSS	0.0565436	0.879937	AT3G04940.2 | cysteine synthase D1 | Chr3:1365681-1367508 FORWARD LENGTH=324 | 201606; PREDICTED: cysteine synthase [Fragaria vesca subsp. vesca]; sp|Q9S6Z7|CYSD1_ARATH Bifunctional L-3-cyanoalanine synthase/cysteine synthase D1 OS=Arabidopsis thaliana OX=3702 GN=CYSD1 PE=1 SV=1; tr|A0A2P6R690|A0A2P6R690_ROSCH Cysteine synthase OS=Rosa chinensis OX=74649 GN=RchiOBHm_Chr3g0452361 PE=3 SV=1	BIFUNCTIONAL CYSTATHIONINE GAMMA-LYASE/CYSTEINE SYNTHASE; CBS_like; CysK; Cys_synth; CYS_SYNTHASE; Cysteine and methionine metabolism; cysteine biosynthetic process from serine; cysteine synthase activity; FvH4_6g03830.t11_v4.0.a2; FvH4_6g03830.t13_v4.0.a2; FvH4_6g03830.t1_v4.0.a2; FvH4_6g03830.t6_v4.0.a2; PALP; PLP-dep; P-phosphate_BS; Seleno-amino acid biosynthesis (plants); SER/THR DEHYDRATASE…	cysteine biosynthetic process from serine; cysteine synthase activity	GO:0004124; GO:0006535
TE_homo_99441	-2.13483	0.0226214	Fvb6:2064620-2064831	Fvb6	2061264	2062987	FvH4_6g03810	+	1633	Downstream TTS	-1.73256	0.333982	NA	disorder_prediction; FvH4_6g03810.t1_v4.0.a2	NA	NA
TE_homo_111693	-2.13413	0.0179971	Fvb6:20570543-20570830	Fvb6	20571628	20579959	FvH4_6g26900	-	799	Downstream TTS	0.206782	0.524458	AT1G06290.1 | acyl-CoA oxidase 3 | Chr1:1922423-1926002 FORWARD LENGTH=675 | 201606; PREDICTED: acyl-coenzyme A oxidase 3, peroxisomal-like isoform X1 [Fragaria vesca subsp. vesca]; sp|P0CZ23|ACOX3_ARATH Acyl-coenzyme A oxidase 3, peroxisomal OS=Arabidopsis thaliana OX=3702 GN=ACX3 PE=1 SV=1; tr|A0A2P6RUC6|A0A2P6RUC6_ROSCH Acyl-coenzyme A oxidase OS=Rosa chinensis OX=74649 GN=RchiOBHm_Chr2g012864…	10-cis-heptadecenoyl-CoA degradation (yeast); 10-trans-heptadecenoyl-CoA degradation (reductase-dependent, yeast); (4Z,7Z,10Z,13Z,16Z)-docosapentaenoate biosynthesis (6-desaturase); (5Z)-dodecenoate biosynthesis II; 6-gingerol analog biosynthesis (engineered); 9-cis, 11-trans-octadecadienoyl-CoA degradation (isomerase-dependent, yeast); ACOX; Acyl-CoA dehydrogenase C-terminal domain-like; Acyl-Co…	acyl-CoA oxidase activity; FAD binding; fatty acid beta-oxidation; fatty acid metabolic process; obsolete oxidation-reduction process; oxidoreductase activity, acting on the CH-CH group of donors; peroxisome	GO:0003997; GO:0005777; GO:0006631; GO:0006635; GO:0016627; GO:0055114; GO:0071949
TE_homo_126640	-2.09817	0.0328032	Fvb7:6418095-6418265	Fvb7	6420533	6425104	FvH4_7g06360	+	2269	Upstream TSS	-1.63004	3.20118e-07	AT5G04550.2 | type-1 restriction enzyme mjaxp r protein (DUF668) | Chr5:1303757-1305556 REVERSE LENGTH=599 | 201606; PREDICTED: uncharacterized protein LOC101303268 [Fragaria vesca subsp. vesca] &gt;gi|764627695|ref|XP_011469281.1| PREDICTED: uncharacterized protein LOC101303268 [Fragaria vesca subsp. vesca]; tr|A0A2P6SCD4|A0A2P6SCD4_ROSCH Uncharacterized protein OS=Rosa chinensis OX=74649 GN=Rch…	disorder_prediction; DUF3475; DUF668; FAMILY NOT NAMED; FvH4_7g06360.t1_v4.0.a2; FvH4_7g06360.t2_v4.0.a2; FvH4_7g06360.t3_v4.0.a2; FvH4_7g06360.t4_v4.0.a2; FvH4_7g06360.t5_v4.0.a2; FvH4_7g06360.t6_v4.0.a2; FvH4_7g06360.t7_v4.0.a2;	NA	NA
TE_homo_61153	-2.03615	0.0221972	Fvb4:4506075-4506395	Fvb4	4503758	4505249	FvH4_4g05260	-	826	Upstream TSS	-8.52139	1.54596e-09	AT4G13540.1 | golgin family A protein | Chr4:7869896-7870604 FORWARD LENGTH=210 | 201606; tr|A0A2P6QRN8|A0A2P6QRN8_ROSCH Uncharacterized protein OS=Rosa chinensis OX=74649 GN=RchiOBHm_Chr4g0396171 PE=4 SV=1; uncharacterized protein LOC112197486 [Rosa chinensis] &gt;gi|1358162377|gb|PRQ36854.1| hypothetical protein RchiOBHm_Chr4g0396171 [Rosa chinensis]	Coil; disorder_prediction; FAMILY NOT NAMED; FvH4_4g05260.t1_v4.0.a2; GOLGIN FAMILY A PROTEIN	NA	NA
TE_homo_61153	-2.03615	0.0221972	Fvb4:4506075-4506395	Fvb4	4493923	4504515	FvH4_4g05250	+	1560	Downstream TTS	-3.25039	4.44616e-07	AT4G13550.2 | putative triglyceride lipase | Chr4:7871251-7876877 REVERSE LENGTH=854 | 201606; PREDICTED: uncharacterized protein LOC101295618 isoform X1 [Fragaria vesca subsp. vesca]; sp|Q0CBM7|FAEA_ASPTN Probable feruloyl esterase A OS=Aspergillus terreus (strain NIH 2624 / FGSC A1156) OX=341663 GN=faeA PE=3 SV=1; tr|A0A2P6QRP4|A0A2P6QRP4_ROSCH Putative feruloyl esterase OS=Rosa chinensis OX=74…	AB_hydrolase; alpha/beta-Hydrolases; Arachidonate production from DAG; C2; C2_dom; C2 domain (Calcium/lipid-binding domain, CaLB); C2_domain_sf; disorder_prediction; FAMILY NOT NAMED; Fungal_lipase-like; FvH4_4g05250.t1_v4.0.a2; Lipase_3; lipid metabolic process	lipid metabolic process	GO:0006629
TE_homo_3932	-1.86425	0.00669686	Fvb1:9551536-9551917	Fvb1	9549529	9551180	FvH4_1g16570	-	356	Upstream TSS	-0.106041	0.823431	AT4G39220.2 | Rer1 family protein | Chr4:18264280-18265531 FORWARD LENGTH=191 | 201606; PREDICTED: protein RER1A [Fragaria vesca subsp. vesca]; sp|O48670|RER1A_ARATH Protein RER1A OS=Arabidopsis thaliana OX=3702 GN=RER1A PE=1 SV=1; tr|A0A2P6RNP6|A0A2P6RNP6_ROSCH Protein RER1 OS=Rosa chinensis OX=74649 GN=RchiOBHm_Chr2g0106481 PE=3 SV=1	AtER_Rer1p; disorder_prediction; FvH4_1g16570.t1_v4.0.a2; FvH4_1g16570.t2_v4.0.a2; integral component of membrane; PROTEIN RER1; Rer1	integral to membrane	GO:0016021
TE_homo_3932	-1.86425	0.00669686	Fvb1:9551536-9551917	Fvb1	9552092	9557456	FvH4_1g16580	+	176	Upstream TSS	-0.629578	0.400186	AT3G19420.1 | PTEN 2 | Chr3:6731824-6735354 FORWARD LENGTH=611 | 201606; PREDICTED: putative tyrosine-protein phosphatase TPTE [Fragaria vesca subsp. vesca]; sp|Q9LT75|PTN2A_ARATH Phosphatidylinositol 3,4,5-trisphosphate 3-phosphatase and protein-tyrosine-phosphatase PTEN2A OS=Arabidopsis thaliana OX=3702 GN=PTEN2A PE=1 SV=1; tr|A0A2P6RNQ8|A0A2P6RNQ8_ROSCH Putative phosphoric monoester hydrolase …	C2_TENSIN; dephosphorylation; disorder_prediction; FvH4_1g16580.t1_v4.0.a2; FvH4_1g16580.t2_v4.0.a2; PHOSPHATASE WITH HOMOLOGY TO TENSIN; PHOSPHATIDYLINOSITOL 3,4,5-TRISPHOSPHATE 3-PHOSPHATASE AND PROTEIN-TYROSINE-PHOSPHATASE PTEN2B; (Phosphotyrosine protein) phosphatases II; PPASE_TENSIN; protein tyrosine phosphatase activity; Prot-tyrosine_phosphatase-like; Tensin_C2-dom; Tensin_phosphatase; Ty…	dephosphorylation; protein tyrosine phosphatase activity	GO:0004725; GO:0016311
TE_homo_3932	-1.86425	0.00669686	Fvb1:9551536-9551917	Fvb1	9547304	9549053	FvH4_1g16560	+	2483	Downstream TTS	-0.971834	0.192031	AT3G50120.1 | transmembrane protein%2C putative (DUF247) | Chr3:18585157-18587246 REVERSE LENGTH=531 | 201606; PREDICTED: UPF0481 protein At3g47200 [Fragaria vesca subsp. vesca]; sp|Q9SD53|Y3720_ARATH UPF0481 protein At3g47200 OS=Arabidopsis thaliana OX=3702 GN=At3g47200 PE=2 SV=1; tr|A0A2P6RNR9|A0A2P6RNR9_ROSCH Uncharacterized protein OS=Rosa chinensis OX=74649 GN=RchiOBHm_Chr2g0106461 PE=4 SV=1	Coil; disorder_prediction; DUF247; DUF247_pln; FAMILY NOT NAMED; FvH4_1g16560.t1_v4.0.a2; PROTEIN, PUTATIVE (DUF247)-RELATED	NA	NA
TE_homo_30262	-1.7775	0.000323651	Fvb2:24812928-24813134	Fvb2	24813558	24819095	FvH4_2g32880	+	425	Upstream TSS	1.2456	8.49887e-07	AT4G07410.1 | Transducin family protein / WD-40 repeat family protein | Chr4:4201465-4205136 REVERSE LENGTH=815 | 201606; PREDICTED: U3 small nucleolar RNA-associated protein 4 [Fragaria vesca subsp. vesca]; sp|Q8RXU6|PCN_ARATH WD repeat-containing protein PCN OS=Arabidopsis thaliana OX=3702 GN=PCN PE=2 SV=1; tr|A0A2P6Q0Z7|A0A2P6Q0Z7_ROSCH Putative transcription factor WD40-like family OS=Rosa ch…	disorder_prediction; FAMILY NOT NAMED; FvH4_2g32880.t1_v4.0.a2; protein binding; WD40; WD40_repeat; WD40_repeat_CS; WD40_repeat_dom; WD40_repeat_dom_sf; WD40 repeat-like; WD40/YVTN_repeat-like_dom_sf; WD_REPEATS_1; WD_REPEATS_2; WD_REPEATS_REGION	protein binding	GO:0005515
TE_homo_117627	-1.73919	0.0100974	Fvb6:29109624-29109797	Fvb6	29104574	29107191	FvH4_6g37042	-	2433	Upstream TSS	NA	NA	AT1G21280.1 | Copia-like polyprotein/retrotransposon | Chr1:7447690-7448403 REVERSE LENGTH=237 | 201606; PREDICTED: uncharacterized protein LOC101306260 [Fragaria vesca subsp. vesca]; sp|Q94HW2|POLR1_ARATH Retrovirus-related Pol polyprotein from transposon RE1 OS=Arabidopsis thaliana OX=3702 GN=RE1 PE=2 SV=1; tr|A0A2K3MJ56|A0A2K3MJ56_TRIPR Uncharacterized protein OS=Trifolium pratense OX=57577 GN…	disorder_prediction; FAMILY NOT NAMED; FvH4_6g37042.t1_v4.0.a2; Retrotrans_gag; Retrotrans_gag_dom;	NA	NA
TE_homo_1359	-1.54036	0.0377543	Fvb1:3769071-3769362	Fvb1	3771407	3772835	FvH4_1g07130	-	2046	Downstream TTS	-0.441337	0.205389	AT2G15690.1 | Tetratricopeptide repeat (TPR)-like superfamily protein | Chr2:6831855-6833594 REVERSE LENGTH=579 | 201606; PREDICTED: pentatricopeptide repeat-containing protein At2g15690-like [Fragaria vesca subsp. vesca]; sp|Q9ZQE5|PP153_ARATH Pentatricopeptide repeat-containing protein At2g15690, mitochondrial OS=Arabidopsis thaliana OX=3702 GN=PCMP-H66 PE=1 SV=2; tr|A0A2P6RK54|A0A2P6RK54_ROSCH…	disorder_prediction; DYW_deaminase; DYW_dom; FAMILY NOT NAMED; FvH4_1g07130.t1_v4.0.a2; Pentatricopeptide_repeat; PPR; protein binding; TIGR00756; TPR-like; TPR-like_helical_dom_sf; zinc ion binding	protein binding; zinc ion binding	GO:0005515; GO:0008270
TE_homo_40967	-1.49256	0.017991	Fvb3:16300740-16300926	Fvb3	16301527	16306078	FvH4_3g23230	+	602	Upstream TSS	-0.34522	0.471551	AT3G20800.1 | Cell differentiation%2C Rcd1-like protein | Chr3:7271412-7273897 REVERSE LENGTH=316 | 201606; PREDICTED: cell differentiation protein RCD1 homolog [Fragaria vesca subsp. vesca]; sp|Q6P819|CNOT9_XENTR CCR4-NOT transcription complex subunit 9 OS=Xenopus tropicalis OX=8364 GN=cnot9 PE=2 SV=1; tr|A0A2P6QCN5|A0A2P6QCN5_ROSCH Putative transcription regulator Rcd1-like family OS=Rosa chine…	Activation of anterior HOX genes in hindbrain development during early embryogenesis; ARM-like; ARM repeat; ARM-type_fold; CCR4-NOT complex; CCR4-NOT TRANSCRIPTION COMPLEX SUBUNIT 9; CNOT9; Deadenylation of mRNA; disorder_prediction; FvH4_3g23230.t1_v4.0.a2; mRNA catabolic process; Rcd1; TP53 regulates transcription of additional cell cycle genes whose exact role in the p53 pathway remain uncerta…	CCR4-NOT complex; mRNA catabolic process	GO:0006402; GO:0030014
TE_homo_40967	-1.49256	0.017991	Fvb3:16300740-16300926	Fvb3	16289943	16300651	FvH4_3g23220	+	89	Downstream TTS	-2.04575	4.12314e-12	AT3G20440.2 | Alpha amylase family protein | Chr3:7123603-7130364 REVERSE LENGTH=899 | 201606; PREDICTED: 1,4-alpha-glucan-branching enzyme 3, chloroplastic/amyloplastic isoform X1 [Fragaria vesca subsp. vesca]; sp|D2WL32|GLGB3_ARATH 1,4-alpha-glucan-branching enzyme 3, chloroplastic/amyloplastic OS=Arabidopsis thaliana OX=3702 GN=SBE3 PE=1 SV=1; tr|A0A251PP82|A0A251PP82_PRUPE Uncharacterized pro…	1,4-ALPHA-GLUCAN-BRANCHING ENZYME 3, CHLOROPLASTIC/AMYLOPLASTIC; 1,4-alpha-glucan branching enzyme activity; A-amylase/branching_C; Alpha-amylase; Alpha-amylase_C; Branching_enzy; carbohydrate metabolic process; catalytic activity; cation binding; CBM_48; disorder_prediction; E set domains; FAMILY NOT NAMED; FvH4_3g23220.t1_v4.0.a2; FvH4_3g23220.t2_v4.0.a2; GlgB; Glycogen biosynthesis II (from UD…	1,4-alpha-glucan branching enzyme activity; carbohydrate metabolic process; catalytic activity; cation binding; glycogen biosynthetic process; hydrolase activity, hydrolyzing O-glycosyl compounds	GO:0003824; GO:0003844; GO:0004553; GO:0005975; GO:0005978; GO:0043169
TE_homo_103775	1.55189	0.0225235	Fvb6:10110706-10111105	Fvb6	10112408	10116114	FvH4_6g16070	+	1304	Upstream TSS	1.63292	0.000264997	AT5G03290.1 | isocitrate dehydrogenase V | Chr5:794043-795939 FORWARD LENGTH=374 | 201606; PREDICTED: isocitrate dehydrogenase [NAD] catalytic subunit 5, mitochondrial [Fragaria vesca subsp. vesca]; sp|Q945K7|IDH5_ARATH Isocitrate dehydrogenase [NAD] catalytic subunit 5, mitochondrial OS=Arabidopsis thaliana OX=3702 GN=IDH5 PE=1 SV=1; tr|A0A2P6RAX3|A0A2P6RAX3_ROSCH Isocitrate dehydrogenase [NAD] …	Citric acid cycle (TCA cycle); DECARBOXYLATING DEHYDROGENASES-ISOCITRATE, ISOPROPYLMALATE, TARTRATE; FvH4_6g16070.t1_v4.0.a2; IDH_IMDH; IsoCit/isopropylmalate_DH_CS; isocitrate dehydrogenase (NAD+) activity; ISOCITRATE DEHYDROGENASE [NAD] CATALYTIC SUBUNIT 6, MITOCHONDRIAL; Isocitrate_DH_NAD; Isocitrate/Isopropylmalate dehydrogenase-like; Iso_dh; IsoPropMal-DH-like_dom; magnesium ion binding; NAD…	isocitrate dehydrogenase (NAD+) activity; magnesium ion binding; NAD binding; obsolete oxidation-reduction process; oxidoreductase activity, acting on the CH-OH group of donors, NAD or NADP as acceptor; tricarboxylic acid cycle	GO:0000287; GO:0004449; GO:0006099; GO:0016616; GO:0051287; GO:0055114
TE_homo_81357	1.56341	0.0380446	Fvb4:33770225-33770627	Fvb4	33770667	33771085	FvH4_4g37182	-	41	Downstream TTS	NA	NA	NA	disorder_prediction; FvH4_4g37182.t1_v4.0.a2	NA	NA
TE_homo_81357	1.56341	0.0380446	Fvb4:33770225-33770627	Fvb4	33770981	33772396	FvH4_4g37190	-	355	Downstream TTS	-0.0785176	0.946912	AT5G08350.1 | GRAM domain-containing protein / ABA-responsive protein-like protein | Chr5:2686417-2687175 REVERSE LENGTH=222 | 201606; PREDICTED: GEM-like protein 7 [Fragaria vesca subsp. vesca]; sp|Q9FTA0|GEML4_ARATH GEM-like protein 4 OS=Arabidopsis thaliana OX=3702 GN=At5g08350 PE=2 SV=1; tr|A0A2P6R4T3|A0A2P6R4T3_ROSCH Putative GRAM domain, PH domain-containing protein OS=Rosa chinensis OX=746…	disorder_prediction; FAMILY NOT NAMED; FvH4_4g37190.t1_v4.0.a2; GEM-like; GEM-LIKE PROTEIN 4; GRAM; PH-like_dom_sf; PROKAR_LIPOPROTEIN	NA	NA
TE_homo_23672	1.62722	0.0443181	Fvb2:12443089-12443301	Fvb2	12443839	12447257	FvH4_2g14180	+	539	Upstream TSS	0.096179	0.859647	AT2G04630.1 | RNA polymerase Rpb6 | Chr2:1619168-1620246 REVERSE LENGTH=144 | 201606; PREDICTED: DNA-directed RNA polymerases II and V subunit 6B-like [Fragaria vesca subsp. vesca]; sp|Q9SJ96|RPB6B_ARATH DNA-directed RNA polymerases II and V subunit 6B OS=Arabidopsis thaliana OX=3702 GN=NRPB6B PE=1 SV=1; tr|A0A2P6PS72|A0A2P6PS72_ROSCH Putative DNA-directed RNA polymerase OS=Rosa chinensis OX=7464…	Abortive elongation of HIV-1 transcript in the absence of Tat; Activation of anterior HOX genes in hindbrain development during early embryogenesis; B-WICH complex positively regulates rRNA expression; Cytosolic sensors of pathogen-associated DNA; disorder_prediction; DNA binding; DNA-directed 5'-3' RNA polymerase activity; DNA-DIRECTED RNA POLYMERASES II AND V SUBUNIT 6B; DNA-DIRECTED RNA POLYME…	DNA binding; DNA-directed 5'-3' RNA polymerase activity; DNA-templated transcription; nucleus; RNA polymerase II, core complex	GO:0003677; GO:0003899; GO:0005634; GO:0005665; GO:0006351
TE_homo_34865	1.65469	0.0338422	Fvb3:6843350-6843770	Fvb3	6840292	6841915	FvH4_3g11590	+	1435	Downstream TTS	-7.76591	1.18356e-20	AT5G36110.1 | cytochrome P450%2C family 716%2C subfamily A%2C polypeptide 1 | Chr5:14195377-14197613 FORWARD LENGTH=477 | 201606; PREDICTED: beta-amyrin 28-oxidase-like [Fragaria vesca subsp. vesca]; sp|F6H9N6|C7A15_VITVI Beta-amyrin 28-monooxygenase OS=Vitis vinifera OX=29760 GN=CYP716A15 PE=1 SV=1; tr|A0A2P6Q6R5|A0A2P6Q6R5_ROSCH Putative cytochrome P450 OS=Rosa chinensis OX=74649 GN=RchiOBHm_Ch…	BP450; Cytochrome P450; CYTOCHROME_P450; Cyt_P450; Cyt_P450_B; Cyt_P450_CS; Cyt_P450_sf; FAMILY NOT NAMED; FvH4_3g11590.t1_v4.0.a2; heme binding; iron ion binding; oxidation-reduction process; oxidoreductase activity, acting on paired donors, with incorporation or reduction of molecular oxygen; p450;	heme binding; iron ion binding; obsolete oxidation-reduction process; oxidoreductase activity, acting on paired donors, with incorporation or reduction of molecular oxygen	GO:0005506; GO:0016705; GO:0020037; GO:0055114
TE_struc_1262	1.80364	0.00638598	Fvb3:29757264-29757661	Fvb3	29757730	29768550	FvH4_3g34270	+	70	Upstream TSS	-2.73151	1.24207e-09	AT3G45780.2 | phototropin 1 | Chr3:16818557-16823960 FORWARD LENGTH=996 | 201606; PREDICTED: phototropin-1 isoform X1 [Fragaria vesca subsp. vesca]; sp|O48963|PHOT1_ARATH Phototropin-1 OS=Arabidopsis thaliana OX=3702 GN=PHOT1 PE=1 SV=1; tr|J7M8M9|J7M8M9_FRAAN Phototropin 1 OS=Fragaria ananassa OX=3747 GN=phot1 PE=2 SV=1	ATP binding; Coil; disorder_prediction; FAMILY NOT NAMED; FvH4_3g34270.t1_v4.0.a2; FvH4_3g34270.t2_v4.0.a2; Kinase-like_dom_sf; PAC; PAS; PAS_9; PAS-assoc_C; PAS-like_dom_sf; PHOTOTROPIN-1; Pkinase; protein kinase activity; PROTEIN_KINASE_ATP; Protein_kinase_ATP_BS; PROTEIN_KINASE_DOM; Protein kinase-like (PK-like); PROTEIN_KINASE_ST; protein phosphorylation; Prot_kinase_dom; PYP-like sensor doma…	ATP binding; protein kinase activity; protein phosphorylation	GO:0004672; GO:0005524; GO:0006468
TE_homo_127641	1.82008	0.0447586	Fvb7:8319745-8320094	Fvb7	8309647	8319232	FvH4_7g08440	-	513	Upstream TSS	-0.0424535	0.930568	AT3G60160.1 | multidrug resistance-associated protein 9 | Chr3:22223829-22229195 REVERSE LENGTH=1506 | 201606; PREDICTED: putative ABC transporter C family member 15 isoform X1 [Fragaria vesca subsp. vesca]; sp|Q9M1C7|AB9C_ARATH ABC transporter C family member 9 OS=Arabidopsis thaliana OX=3702 GN=ABCC9 PE=2 SV=2; tr|A0A2P6SDD5|A0A2P6SDD5_ROSCH Putative xenobiotic-transporting ATPase OS=Rosa chine…	ABC1_TM_dom; ABC1_TM_sf; ABCC_MRP_domain1; ABCC_MRP_domain2; ABC_membrane; ABC_TM1F; ABC_tran; ABC_TRANSPORTER_1; ABC_TRANSPORTER_2; ABC_transporter_CS; ABC_transporter-like; ABC transporter transmembrane region; ATPase activity; ATPase activity, coupled to transmembrane movement of substances; ATP binding; FAMILY NOT NAMED; FvH4_7g08440.t1_v4.0.a2; FvH4_7g08440.t4_v4.0.a2; integral component of …	ATPase-coupled transmembrane transporter activity; ATP binding; ATP hydrolysis activity; integral to membrane; transmembrane transport	GO:0005524; GO:0016021; GO:0016887; GO:0042626; GO:0055085
TE_homo_71203	1.84278	0.00356986	Fvb4:16062358-16062511	Fvb4	16052393	16062266	FvH4_4g12370	-	92	Upstream TSS	-0.737902	0.125503	AT1G48360.2 | zinc ion binding/nucleic acid binding/hydrolase | Chr1:17868661-17872946 FORWARD LENGTH=891 | 201606; PREDICTED: fanconi-associated nuclease 1 homolog [Fragaria vesca subsp. vesca]; sp|Q5XVJ4|FAN1_ARATH Fanconi-associated nuclease 1 homolog OS=Arabidopsis thaliana OX=3702 GN=FAN1 PE=2 SV=2; tr|A0A2P6QVG6|A0A2P6QVG6_ROSCH Fanconi-associated nuclease OS=Rosa chinensis OX=74649 GN=Rchi…	E3 ubiquitin ligases ubiquitinate target proteins; FAMILY NOT NAMED; Fan1-like; Fanconi Anemia Pathway; FvH4_4g12370.t1_v4.0.a2; FvH4_4g12370.t2_v4.0.a2; HIRAN; hydrolase activity, acting on acid anhydrides, in phosphorus-containing anhydrides; hydrolase activity, acting on ester bonds; interstrand cross-link repair; nuclease activity; nucleic acid binding; tRNA_endonuc-like_dom_sf; VRR_NUC; zinc…	hydrolase activity, acting on acid anhydrides, in phosphorus-containing anhydrides; hydrolase activity, acting on ester bonds; nuclease activity; nucleic acid binding; zinc ion binding	GO:0003676; GO:0004518; GO:0008270; GO:0016788; GO:0016818
TE_homo_71481	1.86899	0.0456459	Fvb4:16477167-16477744	Fvb4	16478279	16480258	FvH4_4g12810	-	536	Downstream TTS	-3.01337	5.5203e-06	AT5G17860.2 | calcium exchanger 7 | Chr5:5902638-5904350 REVERSE LENGTH=535 | 201606; PREDICTED: LOW QUALITY PROTEIN: cation/calcium exchanger 1 [Fragaria vesca subsp. vesca]; sp|Q9FKP1|CCX1_ARATH Cation/calcium exchanger 1 OS=Arabidopsis thaliana OX=3702 GN=CCX1 PE=2 SV=1; tr|A0A2P6RHF4|A0A2P6RHF4_ROSCH Putative sodium/calcium exchanger membrane region OS=Rosa chinensis OX=74649 GN=RchiOBHm_Chr3…	CATION/CALCIUM EXCHANGER 1; FvH4_4g12810.t1_v4.0.a2; integral component of membrane; NA+/CA2+ K+ INDEPENDENT EXCHANGER; Na_Ca_ex; NaCa_Exmemb; Sodium/Calcium exchangers; transmembrane transport	integral to membrane; transmembrane transport	GO:0016021; GO:0055085
TE_homo_75529	1.87654	0.00800693	Fvb4:21750579-21751044	Fvb4	21751768	21753523	FvH4_4g17751	+	725	Upstream TSS	-2.93891	0.000104692	NA	FvH4_4g17751.t1_v4.0.a2	NA	NA
TE_homo_28515	1.91363	0.00576302	Fvb2:20222668-20223088	Fvb2	20220481	20222070	FvH4_2g24850	-	598	Upstream TSS	0.777129	0.36249	AT4G03180.1 | rRNA-processing protein | Chr4:1403289-1404663 FORWARD LENGTH=185 | 201606; PREDICTED: rRNA-processing protein FYV7 [Fragaria vesca subsp. vesca]; tr|A0A2P6PWH8|A0A2P6PWH8_ROSCH Uncharacterized protein OS=Rosa chinensis OX=74649 GN=RchiOBHm_Chr6g0292701 PE=4 SV=1	Coil; disorder_prediction; FvH4_2g24850.t1_v4.0.a2; Fyv7/TAP26; rRNA_processing; Surfactant metabolism; UNCHARACTERIZED	NA	NA
TE_homo_28515	1.91363	0.00576302	Fvb2:20222668-20223088	Fvb2	20223629	20225985	FvH4_2g24860	+	542	Upstream TSS	1.97461	0.0278472	AT5G01960.1 | RING/U-box superfamily protein | Chr5:370811-372775 FORWARD LENGTH=426 | 201606; PREDICTED: uncharacterized protein LOC105353484 [Fragaria vesca subsp. vesca]; tr|A0A2P6SLU7|A0A2P6SLU7_ROSCH Putative transcription factor C2H2 family OS=Rosa chinensis OX=74649 GN=RchiOBHm_Chr1g0372711 PE=4 SV=1	FvH4_2g24860.t1_v4.0.a2; RING/U-BOX SUPERFAMILY PROTEIN; UNCHARACTERIZED RING FINGER-CONTAINING PROTEIN	NA	NA
TE_homo_133371	1.97745	0.0490467	Fvb7:19680688-19681074	Fvb7	19681613	19682951	FvH4_7g25840	+	540	Upstream TSS	-8.78116	1.90221e-10	AT3G56290.1 | potassium transporter | Chr3:20878743-20879541 REVERSE LENGTH=173 | 201606; PREDICTED: uncharacterized protein LOC101304133 [Fragaria vesca subsp. vesca]; tr|M5X2I2|M5X2I2_PRUPE Uncharacterized protein OS=Prunus persica OX=3760 GN=PRUPE_2G263300 PE=4 SV=1	disorder_prediction; FAMILY NOT NAMED; FvH4_7g25840.t1_v4.0.a2	NA	NA
TE_homo_133371	1.97745	0.0490467	Fvb7:19680688-19681074	Fvb7	19683442	19687656	FvH4_7g25850	+	2369	Upstream TSS	3.58278	2.85481e-29	AT2G40550.1 | E2F target protein 1 (ETG1) | Chr2:16934927-16938033 FORWARD LENGTH=589 | 201606; PREDICTED: mini-chromosome maintenance complex-binding protein [Fragaria vesca subsp. vesca]; sp|Q501D5|MCMBP_ARATH Mini-chromosome maintenance complex-binding protein OS=Arabidopsis thaliana OX=3702 GN=ETG1 PE=1 SV=1; tr|A0A2P6SLS9|A0A2P6SLS9_ROSCH Putative mini-chromosome maintenance complex-binding …	disorder_prediction; FvH4_7g25850.t1_v4.0.a2; MCM_bind; MCM_complex-bd; UNCHARACTERIZED	NA	NA
TE_homo_133371	1.97745	0.0490467	Fvb7:19680688-19681074	Fvb7	19674610	19680559	FvH4_7g25830	+	129	Downstream TTS	-1.17428	0.120285	AT2G40540.5 | potassium transporter 2 | Chr2:16931445-16934516 FORWARD LENGTH=794 | 201606; PREDICTED: potassium transporter 2 [Fragaria vesca subsp. vesca] &gt;gi|764634455|ref|XP_011469989.1| PREDICTED: potassium transporter 2 [Fragaria vesca subsp. vesca] &gt;gi|764634460|ref|XP_011469990.1| PREDICTED: potassium transporter 2 [Fragaria vesca subsp. vesca] &gt;gi|764634465|ref|XP_011469991.1| P…	FvH4_7g25830.t10_v4.0.a2; FvH4_7g25830.t11_v4.0.a2; FvH4_7g25830.t12_v4.0.a2; FvH4_7g25830.t1_v4.0.a2; FvH4_7g25830.t2_v4.0.a2; FvH4_7g25830.t3_v4.0.a2; FvH4_7g25830.t4_v4.0.a2; FvH4_7g25830.t5_v4.0.a2; FvH4_7g25830.t6_v4.0.a2; FvH4_7g25830.t7_v4.0.a2; FvH4_7g25830.t8_v4.0.a2; FvH4_7g25830.t9_v4.0.a2; K_trans; K+_transporter; membrane; OSMOTIC STRESS POTASSIUM TRANSPORTER; potassium ion transmemb…	membrane; potassium ion transmembrane transport; potassium ion transmembrane transporter activity	GO:0015079; GO:0016020; GO:0071805
TE_homo_10957	1.99191	0.000535243	Fvb1:20068954-20069373	Fvb1	20065271	20066268	FvH4_1g28230	-	2686	Upstream TSS	-1.27628	0.0200247	AT5G18130.1 | transmembrane protein | Chr5:5995634-5997165 FORWARD LENGTH=280 | 201606; PREDICTED: uncharacterized protein LOC101313552 [Fragaria vesca subsp. vesca]; tr|A0A2P6RHM2|A0A2P6RHM2_ROSCH Uncharacterized protein OS=Rosa chinensis OX=74649 GN=RchiOBHm_Chr3g0497011 PE=4 SV=1	disorder_prediction; F20H23.8 PROTEIN; FAMILY NOT NAMED; FvH4_1g28230.t1_v4.0.a2	NA	NA
TE_homo_10957	1.99191	0.000535243	Fvb1:20068954-20069373	Fvb1	20069624	20077317	FvH4_1g28240	-	252	Downstream TTS	1.19058	0.0128478	AT3G03860.1 | APR-like 5 | Chr3:992465-994315 FORWARD LENGTH=300 | 201606; PREDICTED: 5'-adenylylsulfate reductase-like 5, partial [Fragaria vesca subsp. vesca]; sp|Q93YX4|APRL5_ARATH 5'-adenylylsulfate reductase-like 5 OS=Arabidopsis thaliana OX=3702 GN=APRL5 PE=2 SV=1; tr|A0A2P6RHM1|A0A2P6RHM1_ROSCH Putative thioredoxin-like protein OS=Rosa chinensis OX=74649 GN=RchiOBHm_Chr3g0496981 PE=4 SV=1	5'-ADENYLYLSULFATE REDUCTASE-LIKE 7; cell redox homeostasis; FAMILY NOT NAMED; FvH4_1g28240.t1_v4.0.a2; Thioredoxin; THIOREDOXIN_2; Thioredoxin_domain; Thioredoxin-like; Thioredoxin-like_sf	cell redox homeostasis	GO:0045454
TE_homo_125852	1.9934	0.0114531	Fvb7:5136605-5136973	Fvb7	5134764	5135889	FvH4_7g04610	-	716	Upstream TSS	1.45478	6.81514e-05	putative kelch-type beta propeller [Rosa chinensis]; tr|A0A2P6QUH2|A0A2P6QUH2_ROSCH Putative kelch-type beta propeller OS=Rosa chinensis OX=74649 GN=RchiOBHm_Chr4g0406891 PE=4 SV=1	DUF1668; DUF1668_ORYSA; FvH4_7g04610.t1_v4.0.a2; Kelch motif; Kelch-typ_b-propeller; protein binding	protein binding	GO:0005515
TE_homo_125852	1.9934	0.0114531	Fvb7:5136605-5136973	Fvb7	5137468	5144598	FvH4_7g04620	+	496	Upstream TSS	-0.549649	0.0663062	AT3G54360.2 | zinc ion binding protein | Chr3:20128570-20131581 REVERSE LENGTH=405 | 201606; PREDICTED: uncharacterized protein LOC101299030 [Fragaria vesca subsp. vesca]; sp|Q9M2V1|NCA1_ARATH Protein NCA1 OS=Arabidopsis thaliana OX=3702 GN=NCA1 PE=1 SV=1; tr|A0A2P6SB88|A0A2P6SB88_ROSCH Putative transcription factor C2H2 family OS=Rosa chinensis OX=74649 GN=RchiOBHm_Chr1g0330051 PE=4 SV=1	EARLY GIRL, ISOFORM A; FvH4_7g04620.t1_v4.0.a2; protein binding; RING FINGER PROTEIN 41, 151; RING/U-box; TPR_12; TPR-like; TPR-like_helical_dom_sf; zf-C3HC4_3; ZF_RING_1; ZF_RING_2; Znf_RING; Znf_RING_CS; Znf_RING/FYVE/PHD	protein binding	GO:0005515
TE_homo_52731	2.04408	0.0425352	Fvb3:29851325-29851743	Fvb3	29853882	29854832	FvH4_3g34400	+	2140	Upstream TSS	NA	NA	PREDICTED: uncharacterized protein LOC101306804 [Fragaria vesca subsp. vesca]; tr|A0A2P6QI25|A0A2P6QI25_ROSCH Putative transcription factor interactor and regulator CCHC(Zn) family OS=Rosa chinensis OX=74649 GN=RchiOBHm_Chr5g0061971 PE=4 SV=1	disorder_prediction; FvH4_3g34400.t1_v4.0.a2	NA	NA
TE_homo_52731	2.04408	0.0425352	Fvb3:29851325-29851743	Fvb3	29848472	29848808	FvH4_3g34361	+	2517	Downstream TTS	4.36046	0.0249547	NA	disorder_prediction; FvH4_3g34361.t1_v4.0.a2	NA	NA
TE_homo_52731	2.04408	0.0425352	Fvb3:29851325-29851743	Fvb3	29848831	29849912	FvH4_3g34390	+	1413	Downstream TTS	5.69661	0.000539458	PREDICTED: uncharacterized protein LOC101313000 [Fragaria vesca subsp. vesca]; tr|A0A2P6QI25|A0A2P6QI25_ROSCH Putative transcription factor interactor and regulator CCHC(Zn) family OS=Rosa chinensis OX=74649 GN=RchiOBHm_Chr5g0061971 PE=4 SV=1	FvH4_3g34390.t1_v4.0.a2	NA	NA
TE_homo_33363	2.10766	0.000588731	Fvb3:3882326-3882513	Fvb3	3883157	3888305	FvH4_3g06740	-	645	Downstream TTS	-1.95636	5.37679e-14	AT4G18950.1 | Integrin-linked protein kinase family | Chr4:10375685-10378129 FORWARD LENGTH=459 | 201606; PREDICTED: serine/threonine-protein kinase HT1 [Fragaria vesca subsp. vesca]; sp|F4IS56|ILK1_ARATH Integrin-linked protein kinase 1 OS=Arabidopsis thaliana OX=3702 GN=ILK1 PE=1 SV=1; tr|A0A2P6Q555|A0A2P6Q555_ROSCH Uncharacterized protein OS=Rosa chinensis OX=74649 GN=RchiOBHm_Chr5g0012421 PE=…	ANK; Ank_2; ANK_REPEAT; ANK_REP_REGION; Ankyrin repeat; Ankyrin_rpt; Ankyrin_rpt-contain_dom; Ankyrin_rpt-contain_sf; ATP binding; Coil; FAMILY NOT NAMED; FvH4_3g06740.t1_v4.0.a2; ILK; Kinase-like_dom_sf; Pkinase_Tyr; protein binding; protein kinase activity; PROTEIN_KINASE_DOM; Protein kinase-like (PK-like); protein phosphorylation; Prot_kinase_dom; Ser-Thr/Tyr_kinase_cat_dom; ; STKc_MAP3K-like	ATP binding; protein binding; protein kinase activity; protein phosphorylation	GO:0004672; GO:0005515; GO:0005524; GO:0006468
TE_homo_120946	2.17194	0.0303711	Fvb6:35425717-35426074	Fvb6	35419435	35423745	FvH4_6g46420	-	1972	Upstream TSS	9.11151	6.24219e-09	AT3G02310.1 | K-box region and MADS-box transcription factor family protein | Chr3:464554-466687 REVERSE LENGTH=250 | 201606; PREDICTED: developmental protein SEPALLATA 1 [Fragaria vesca subsp. vesca] &gt;gi|28628841|gb|AAO49380.1| MADS-RIN-like protein [Fragaria x ananassa]; sp|P29384|SEP2_ARATH Developmental protein SEPALLATA 2 OS=Arabidopsis thaliana OX=3702 GN=SEP2 PE=1 SV=1; tr|Q84U54|Q84U54…	Coil; DNA binding; DNA-binding transcription factor activity; FvH4_6g46420.t1_v4.0.a2; K-box; K_BOX; MADS_BOX_1; MADS_BOX_2; MADS BOX PROTEIN; MADSDOMAIN; MADS_MEF2-like; MADS_MEF2_like; Myogenesis; nucleus; positive regulation of transcription by RNA polymerase II; protein dimerization activity; regulation of transcription, DNA-templated; RNA polymerase II regulatory region sequence-specific DNA…	DNA binding; DNA-binding transcription factor activity; nucleus; positive regulation of transcription by RNA polymerase II; protein dimerization activity; regulation of DNA-templated transcription; RNA polymerase II transcription regulatory region sequence-specific DNA binding	GO:0000977; GO:0003677; GO:0003700; GO:0005634; GO:0006355; GO:0045944; GO:0046983
TE_homo_120946	2.17194	0.0303711	Fvb6:35425717-35426074	Fvb6	35426762	35427872	FvH4_6g46421	-	689	Downstream TTS	NA	NA	PREDICTED: uncharacterized protein LOC105351802 [Fragaria vesca subsp. vesca]	FvH4_6g46421.t1_v4.0.a2	NA	NA
TE_homo_120946	2.17194	0.0303711	Fvb6:35425717-35426074	Fvb6	35428458	35430517	FvH4_6g46430	-	2385	Downstream TTS	-4.59807	7.98716e-10	AT5G15802.1 | chaperone | Chr5:5156578-5157520 REVERSE LENGTH=99 | 201606; PREDICTED: uncharacterized protein LOC101312174 isoform X2 [Fragaria vesca subsp. vesca]; tr|A0A2P6S3Q3|A0A2P6S3Q3_ROSCH Uncharacterized protein OS=Rosa chinensis OX=74649 GN=RchiOBHm_Chr2g0164961 PE=4 SV=1	CHAPERONE; FAMILY NOT NAMED; FvH4_6g46430.t1_v4.0.a2; FvH4_6g46430.t3_v4.0.a2	NA	NA
TE_homo_21548	2.17702	0.005356	Fvb2:9786937-9787362	Fvb2	9787905	9791847	FvH4_2g11260	+	544	Upstream TSS	-3.73848	0.185868	AT2G29120.1 | glutamate receptor 2.7 | Chr2:12511479-12515893 REVERSE LENGTH=952 | 201606; PREDICTED: glutamate receptor 2.8 isoform X1 [Fragaria vesca subsp. vesca]; sp|Q8LGN0|GLR27_ARATH Glutamate receptor 2.7 OS=Arabidopsis thaliana OX=3702 GN=GLR2.7 PE=2 SV=3; tr|A0A2P6PQH2|A0A2P6PQH2_ROSCH Glutamate receptor OS=Rosa chinensis OX=74649 GN=RchiOBHm_Chr6g0269601 PE=3 SV=1	ANF_lig-bd_rcpt; ANF_receptor; FvH4_2g11260.t1_v4.0.a2; GluR_Plant; IGluLR_plant; IONOTROPIC GLUTAMATE RECEPTOR; ionotropic glutamate receptor activity; Iontropic_Glu_rcpt_pln; Iontro_rcpt; Lig_chan; membrane; PBP1_GABAb_receptor; Peripla_BP_I; Periplasmic binding protein-like I; Periplasmic binding protein-like II; SBP_bac_3; ; Solute-binding_3/MltF_N	glutamate-gated receptor activity; membrane	GO:0004970; GO:0016020
TE_homo_27061	2.22878	0.00102016	Fvb2:17763609-17763942	Fvb2	17760833	17763344	FvH4_2g21350	-	265	Upstream TSS	-2.5284	8.14184e-13	AT1G06190.1 | Rho termination factor | Chr1:1892467-1894078 REVERSE LENGTH=401 | 201606; PREDICTED: rho-N domain-containing protein 1, chloroplastic [Fragaria vesca subsp. vesca]; sp|Q94K75|RHON1_ARATH Rho-N domain-containing protein 1, chloroplastic OS=Arabidopsis thaliana OX=3702 GN=RHON1 PE=1 SV=1; tr|A0A2P6PV83|A0A2P6PV83_ROSCH Putative SAP domain, Rho termination factor OS=Rosa chinensis OX=…	ATP BINDING / ATPASE; disorder_prediction; DNA-templated transcription, termination; FAMILY NOT NAMED; FvH4_2g21350.t1_v4.0.a2; Rho_N	DNA-templated transcription termination	GO:0006353
TE_homo_132482	2.24408	0.00174571	Fvb7:17389235-17389633	Fvb7	17386896	17388118	FvH4_7g21860	+	1117	Downstream TTS	NA	NA	NA	Coil; disorder_prediction; FvH4_7g21860.t1_v4.0.a2	NA	NA
TE_homo_87505	2.3097	0.0464137	Fvb5:13299858-13300190	Fvb5	13297755	13298469	FvH4_5g21930	-	1389	Upstream TSS	NA	NA	AT4G17810.1 | C2H2 and C2HC zinc fingers superfamily protein | Chr4:9906918-9907532 FORWARD LENGTH=204 | 201606; PREDICTED: transcriptional regulator SUPERMAN [Fragaria vesca subsp. vesca]; sp|O80942|ZFP10_ARATH Zinc finger protein 10 OS=Arabidopsis thaliana OX=3702 GN=ZFP10 PE=2 SV=1; tr|A0A2P6P9Z4|A0A2P6P9Z4_ROSCH Putative transcription factor C2H2 family OS=Rosa chinensis OX=74649 GN=RchiOBHm_…	beta-beta-alpha zinc fingers; disorder_prediction; FAMILY NOT NAMED; FvH4_5g21930.t1_v4.0.a2; nucleic acid binding; ; zf-C2H2_6; ZINC_FINGER_C2H2_1; ZINC_FINGER_C2H2_2; Znf_C2H2_sf; Znf_C2H2_type	nucleic acid binding	GO:0003676
TE_homo_22736	2.32288	0.0447586	Fvb2:11254124-11254236	Fvb2	11255524	11258798	FvH4_2g12801	-	1289	Downstream TTS	-2.91886	6.98306e-06	AT2G33260.2 | Tryptophan/tyrosine permease | Chr2:14100840-14102564 REVERSE LENGTH=540 | 201606; PREDICTED: uncharacterized protein LOC101306011 [Fragaria vesca subsp. vesca]; sp|P44614|MTR_HAEIN Tryptophan-specific transport protein OS=Haemophilus influenzae (strain ATCC 51907 / DSM 11121 / KW20 / Rd) OX=71421 GN=mtr PE=3 SV=1; tr|M5VWF7|M5VWF7_PRUPE Uncharacterized protein OS=Prunus persica OX=…	amino acid transmembrane transport; Amino_acid_transport_2; FAMILY NOT NAMED; FvH4_2g12801.t1_v4.0.a2; Trp_Tyr_perm	amino acid transmembrane transport	GO:0003333
TE_homo_106387	2.3747	2.56746e-05	Fvb6:13948930-13949337	Fvb6	13945402	13946457	FvH4_6g20342	-	2473	Upstream TSS	NA	NA	tr|A0A2P6QC43|A0A2P6QC43_ROSCH Putative ribonuclease H-like domain-containing protein OS=Rosa chinensis OX=74649 GN=RchiOBHm_Chr5g0038961 PE=4 SV=1; uncharacterized protein LOC112164413 [Rosa chinensis]	FAMILY NOT NAMED; FvH4_6g20342.t1_v4.0.a2; nucleic acid binding; POLYNUCLEOTIDYL TRANSFERASE, RIBONUCLEASE H-LIKE SUPERFAMILY PROTEIN; RNA-DNA hybrid ribonuclease activity; RNaseH_domain; RNase_H_like; RNaseH_sf; RVT_3	nucleic acid binding; RNA-DNA hybrid ribonuclease activity	GO:0003676; GO:0004523
TE_homo_106387	2.3747	2.56746e-05	Fvb6:13948930-13949337	Fvb6	13950478	13955299	FvH4_6g20350	+	1142	Upstream TSS	1.02897	0.000159999	AT2G35940.3 | BEL1-like homeodomain 1 | Chr2:15089171-15091699 REVERSE LENGTH=680 | 201606; PREDICTED: BEL1-like homeodomain protein 1 [Fragaria vesca subsp. vesca]; sp|Q9SJ56|BLH1_ARATH BEL1-like homeodomain protein 1 OS=Arabidopsis thaliana OX=3702 GN=BLH1 PE=1 SV=1; tr|A0A2P6RCJ7|A0A2P6RCJ7_ROSCH Putative transcription factor Homobox-WOX family OS=Rosa chinensis OX=74649 GN=RchiOBHm_Chr3g04759…	disorder_prediction; DNA binding; FvH4_6g20350.t1_v4.0.a2; FvH4_6g20350.t2_v4.0.a2; FvH4_6g20350.t3_v4.0.a2; FvH4_6g20350.t4_v4.0.a2; FvH4_6g20350.t5_v4.0.a2; FvH4_6g20350.t6_v4.0.a2; FvH4_6g20350.t7_v4.0.a2; FvH4_6g20350.t8_v4.0.a2; FvH4_6g20350.t9_v4.0.a2; HOMEOBOX_2; Homeobox_dom; Homeobox_KN; Homeobox_KN_domain; Homeobox-like_sf; HOMEOBOX PROTEIN TRANSCRIPTION FACTORS; homeodomain; Homeodomai…	DNA binding; regulation of DNA-templated transcription	GO:0003677; GO:0006355
TE_homo_84377	2.43689	0.0422227	Fvb5:7407660-7408011	Fvb5	7410361	7412175	FvH4_5g13113	-	2351	Downstream TTS	NA	NA	NA	FvH4_5g13113.t1_v4.0.a2	NA	NA
TE_homo_5343	2.46469	0.00149943	Fvb1:12094839-12095015	Fvb1	12095396	12098436	FvH4_1g19970	+	382	Upstream TSS	-1.09649	0.0154874	AT2G22490.1 | Cyclin D2%3B1 | Chr2:9554157-9555873 REVERSE LENGTH=361 | 201606; PREDICTED: cyclin-D2-1 [Fragaria vesca subsp. vesca]; sp|P42752|CCD21_ARATH Cyclin-D2-1 OS=Arabidopsis thaliana OX=3702 GN=CYCD2-1 PE=1 SV=3; tr|A0A2P6RQ27|A0A2P6RQ27_ROSCH Putative cyclin OS=Rosa chinensis OX=74649 GN=RchiOBHm_Chr2g0111911 PE=3 SV=1	Cyclin; CYCLIN; Cyclin_A_B_D_E; Cyclin_C; Cyclin_C-dom; CYCLIN-D2-1; CYCLINE; Cyclin-like; Cyclin-like_sf; Cyclin_N; FvH4_1g19970.t1_v4.0.a2; nucleus	nucleus	GO:0005634
TE_struc_57	2.51137	0.000409461	Fvb1:4500685-4501073	Fvb1	4498082	4499877	FvH4_1g08454	+	808	Downstream TTS	0.111402	0.947885	AT2G06050.3 | oxophytodienoate-reductase 3 | Chr2:2359240-2361971 REVERSE LENGTH=391 | 201606; PREDICTED: 12-oxophytodienoate reductase 3-like [Fragaria vesca subsp. vesca]; sp|Q9FEW9|OPR3_SOLLC 12-oxophytodienoate reductase 3 OS=Solanum lycopersicum OX=4081 GN=OPR3 PE=1 SV=1; tr|A0A2P6RKL7|A0A2P6RKL7_ROSCH Putative 12-oxophytodienoate reductase OS=Rosa chinensis OX=74649 GN=RchiOBHm_Chr2g0094631…	12-OXOPHYTODIENOATE REDUCTASE 3; Aldolase_TIM; catalytic activity; FMN binding; FMN-linked oxidoreductases; FvH4_1g08454.t1_v4.0.a2; NADH OXIDOREDUCTASE-RELATED; oxidation-reduction process; Oxidored_FMN; oxidoreductase activity; OxRdtase_FMN_N; OYE_like_FMN	catalytic activity; FMN binding; obsolete oxidation-reduction process; oxidoreductase activity	GO:0003824; GO:0010181; GO:0016491; GO:0055114
TE_homo_29162	2.51623	0.0191345	Fvb2:22187107-22187526	Fvb2	22188162	22189002	FvH4_2g28210	+	637	Upstream TSS	NA	NA	NA	disorder_prediction; FvH4_2g28210.t1_v4.0.a2	NA	NA
TE_homo_29162	2.51623	0.0191345	Fvb2:22187107-22187526	Fvb2	22184510	22184825	FvH4_2g28200	+	2282	Downstream TTS	NA	NA	NA	disorder_prediction; FvH4_2g28200.t1_v4.0.a2	NA	NA
TE_homo_112796	2.54345	0.00610572	Fvb6:21862592-21863021	Fvb6	21863958	21867702	FvH4_6g28380	+	938	Upstream TSS	-6.61996	0.00534134	AT2G24130.2 | Leucine-rich receptor-like protein kinase family protein | Chr2:10258148-10261220 FORWARD LENGTH=995 | 201606; PREDICTED: putative leucine-rich repeat receptor-like serine/threonine-protein kinase At2g24130 [Fragaria vesca subsp. vesca]; sp|Q9ZUI0|Y2241_ARATH Putative leucine-rich repeat receptor-like serine/threonine-protein kinase At2g24130 OS=Arabidopsis thaliana OX=3702 GN=At2g2…	ATP binding; FAMILY NOT NAMED; FvH4_6g28380.t1_v4.0.a2; Kinase-like_dom_sf; L domain-like; Leu-rich_rpt; LRR_8; LRR_dom_sf; LRR_N_plant-typ; LRRNT_2; Pkinase; PROKAR_LIPOPROTEIN; protein binding; protein kinase activity; PROTEIN_KINASE_ATP; Protein_kinase_ATP_BS; PROTEIN_KINASE_DOM; Protein kinase-like (PK-like); PROTEIN_KINASE_ST; protein phosphorylation; Prot_kinase_dom; Ser/Thr_kinase_AS; ; ST…	ATP binding; protein binding; protein kinase activity; protein phosphorylation	GO:0004672; GO:0005515; GO:0005524; GO:0006468
TE_homo_117315	2.55658	0.00429858	Fvb6:28522951-28523362	Fvb6	28518722	28521356	FvH4_6g36270	-	1595	Upstream TSS	6.07622	1.02451e-16	AT5G66460.1 | Glycosyl hydrolase superfamily protein | Chr5:26538911-26540837 REVERSE LENGTH=431 | 201606; PREDICTED: mannan endo-1,4-beta-mannosidase 4-like [Fragaria vesca subsp. vesca]; sp|Q8L5J1|MAN4_SOLLC Mannan endo-1,4-beta-mannosidase 4 OS=Solanum lycopersicum OX=4081 GN=MAN4 PE=1 SV=2; tr|A0A2P6RZD3|A0A2P6RZD3_ROSCH Putative mannan endo-1,4-beta-mannosidase OS=Rosa chinensis OX=74649 GN=…	carbohydrate metabolic process; Cellulase; FAMILY NOT NAMED; FvH4_6g36270.t1_v4.0.a2; Glyco_hydro_5; Glycoside_hydrolase_SF; hydrolase activity, hydrolyzing O-glycosyl compounds; ; (Trans)glycosidases	carbohydrate metabolic process; hydrolase activity, hydrolyzing O-glycosyl compounds	GO:0004553; GO:0005975
TE_homo_129883	2.56893	0.00117224	Fvb7:12151600-12151753	Fvb7	12146934	12150325	FvH4_7g13570	-	1275	Upstream TSS	-5.89063	0.115088	AT3G05660.1 | receptor like protein 33 | Chr3:1649258-1652001 REVERSE LENGTH=875 | 201606; PREDICTED: receptor-like protein 12 [Fragaria vesca subsp. vesca]; sp|F4J8G2|RLP33_ARATH Receptor-like protein 33 OS=Arabidopsis thaliana OX=3702 GN=RLP33 PE=3 SV=1; tr|A0A2P6SGR9|A0A2P6SGR9_ROSCH Putative leucine-rich repeat-containing, plant-type, leucine-rich repeat domain, L OS=Rosa chinensis OX=74649 G…	FAMILY NOT NAMED; FvH4_7g13570.t1_v4.0.a2; L domain-like; Leu-rich_rpt; LEURICHRPT; LRR_8; LRR_dom_sf; LRR_N_plant-typ; LRRNT_2; protein binding; RNI-like;	protein binding	GO:0005515
TE_homo_78752	2.58127	0.000365405	Fvb4:27320163-27320457	Fvb4	27323360	27325749	FvH4_4g25610	-	2904	Downstream TTS	3.97735	5.06614e-05	AT1G59960.1 | NAD(P)-linked oxidoreductase superfamily protein | Chr1:22071410-22073067 REVERSE LENGTH=326 | 201606; PREDICTED: non-functional NADPH-dependent codeinone reductase 2-like [Fragaria vesca subsp. vesca]; sp|Q9SQ64|COR2_PAPSO Non-functional NADPH-dependent codeinone reductase 2 OS=Papaver somniferum OX=3469 GN=COR2 PE=1 SV=1; tr|Q5Y381|Q5Y381_FRAAN Aldo/keto reductase OS=Fragaria anan…	AKR; ALDKETRDTASE; Aldo/keto_reductase; ALDO/KETO REDUCTASE; ALDOKETO_REDUCTASE_2; Aldo_ket_red; Aldo/ket_reductase_CS; FvH4_4g25610.t1_v4.0.a2; FvH4_4g25610.t2_v4.0.a2; NAD(P)-linked oxidoreductase; NADP_OxRdtase_dom; NADP_OxRdtase_dom_sf; oxidation-reduction process; oxidoreductase activity;	obsolete oxidation-reduction process; oxidoreductase activity	GO:0016491; GO:0055114
TE_homo_6789	2.61774	0.00533333	Fvb1:14145159-14145342	Fvb1	14145633	14150251	FvH4_1g22230	+	292	Upstream TSS	0.221486	0.463874	AT5G64860.1 | disproportionating enzyme | Chr5:25925373-25928788 REVERSE LENGTH=576 | 201606; PREDICTED: 4-alpha-glucanotransferase, chloroplastic/amyloplastic [Fragaria vesca subsp. vesca]; sp|Q06801|DPEP_SOLTU 4-alpha-glucanotransferase, chloroplastic/amyloplastic OS=Solanum tuberosum OX=4113 GN=DPEP PE=1 SV=1; tr|A0A2P6RR79|A0A2P6RR79_ROSCH 4-alpha-glucanotransferase OS=Rosa chinensis OX=74649…	4-alpha-glucanotransferase activity; carbohydrate metabolic process; FAMILY NOT NAMED; FvH4_1g22230.t1_v4.0.a2; Glycogen degradation II; Glyco_hydro_77; Glycoside_hydrolase_SF; Starch and sucrose metabolism; Starch degradation II; Starch degradation V; Sucrose biosynthesis II; TIGR00217; (Trans)glycosidases	4-alpha-glucanotransferase activity; carbohydrate metabolic process	GO:0004134; GO:0005975
TE_homo_6789	2.61774	0.00533333	Fvb1:14145159-14145342	Fvb1	14141233	14142655	FvH4_1g22210	+	2504	Downstream TTS	-6.31565	7.97434e-12	AT2G21990.1 | MIZU-KUSSEI-like protein (Protein of unknown function%2C DUF617) | Chr2:9359573-9360331 REVERSE LENGTH=252 | 201606; PREDICTED: protein MIZU-KUSSEI 1 [Fragaria vesca subsp. vesca]; sp|O22227|MIZ1_ARATH Protein MIZU-KUSSEI 1 OS=Arabidopsis thaliana OX=3702 GN=MIZ1 PE=1 SV=1; tr|A0A2P6RR85|A0A2P6RR85_ROSCH Uncharacterized protein OS=Rosa chinensis OX=74649 GN=RchiOBHm_Chr2g0116351 PE=…	disorder_prediction; DUF617; FAMILY NOT NAMED; FvH4_1g22210.t1_v4.0.a2; hydrotropism; MIZ1-like_pln; ; TIGR01570	hydrotropism	GO:0010274
TE_homo_6789	2.61774	0.00533333	Fvb1:14145159-14145342	Fvb1	14143429	14144144	FvH4_1g22220	+	1015	Downstream TTS	3.14419	5.30035e-08	AT2G21970.1 | stress enhanced protein 2 | Chr2:9357188-9357874 REVERSE LENGTH=202 | 201606; PREDICTED: stress enhanced protein 2, chloroplastic [Fragaria vesca subsp. vesca]; sp|Q9SJ02|STEP2_ARATH Stress enhanced protein 2, chloroplastic OS=Arabidopsis thaliana OX=3702 GN=SEP2 PE=2 SV=1; tr|A0A2P6RRC0|A0A2P6RRC0_ROSCH Putative chlorophyll a/b binding protein OS=Rosa chinensis OX=74649 GN=RchiOBHm…	Chlorophyll a-b binding protein; FAMILY NOT NAMED; FvH4_1g22220.t1_v4.0.a2	NA	NA
TE_homo_47176	2.64384	0.0359201	Fvb3:23499876-23500257	Fvb3	23492511	23498314	FvH4_3g30290	-	1562	Upstream TSS	1.35581	0.0275149	AT4G26690.1 | PLC-like phosphodiesterase family protein | Chr4:13456793-13459890 REVERSE LENGTH=759 | 201606; PREDICTED: glycerophosphodiester phosphodiesterase GDPDL3-like [Fragaria vesca subsp. vesca]; sp|Q9SZ11|GPDL3_ARATH Glycerophosphodiester phosphodiesterase GDPDL3 OS=Arabidopsis thaliana OX=3702 GN=GDPDL3 PE=2 SV=3; tr|A0A2P6QGL1|A0A2P6QGL1_ROSCH Putative glycerophosphodiester phosphodies…	disorder_prediction; FAMILY NOT NAMED; FvH4_3g30290.t1_v4.0.a2; GDPD; GDPD_SHV3_repeat_1; GDPD_SHV3_repeat_2; GLYCEROPHOSPHODIESTER PHOSPHODIESTERASE GDPDL1-RELATED; GP_PDE; GP_PDE_dom; lipid metabolic process; phosphoric diester hydrolase activity; PLC-like_Pdiesterase_TIM-brl; PLC-like phosphodiesterases	lipid metabolic process; phosphoric diester hydrolase activity	GO:0006629; GO:0008081
TE_homo_105821	2.64935	0.00356986	Fvb6:13320032-13320429	Fvb6	13317335	13318077	FvH4_6g19840	-	1955	Upstream TSS	NA	NA	tr|A0A2P6RLX8|A0A2P6RLX8_ROSCH Uncharacterized protein OS=Rosa chinensis OX=74649 GN=RchiOBHm_Chr2g0099411 PE=4 SV=1	disorder_prediction; FvH4_6g19840.t1_v4.0.a2	NA	NA
TE_homo_105821	2.64935	0.00356986	Fvb6:13320032-13320429	Fvb6	13321027	13323909	FvH4_6g19850	+	599	Upstream TSS	0.687207	9.98564e-05	AT2G36060.1 | MMS ZWEI homologue 3 | Chr2:15143012-15143998 REVERSE LENGTH=145 | 201606; PREDICTED: ubiquitin-conjugating enzyme E2 variant 1C [Fragaria vesca subsp. vesca]; sp|Q9SJ44|UEV1C_ARATH Ubiquitin-conjugating enzyme E2 variant 1C OS=Arabidopsis thaliana OX=3702 GN=UEV1C PE=1 SV=1; tr|A0A2P6RCD6|A0A2P6RCD6_ROSCH Putative aminoacyltransferase, E1 ubiquitin-activating enzyme OS=Rosa chinens…	Antigen processing: Ubiquitination &amp; Proteasome degradation; FAMILY NOT NAMED; FvH4_6g19850.t1_v4.0.a2; ; UBC-like; UBIQUITIN_CONJUGAT_2; UBQ-conjugat_E2; UBQ-conjugating_enzyme/RWD; UQ_con	NA	NA
TE_homo_105821	2.64935	0.00356986	Fvb6:13320032-13320429	Fvb6	13316138	13317056	FvH4_6g19830	+	2976	Downstream TTS	NA	NA	NA	FvH4_6g19830.t1_v4.0.a2	NA	NA
TE_homo_92662	2.68795	0.00426789	Fvb5:20492374-20492787	Fvb5	20489136	20491823	FvH4_5g29550	-	551	Upstream TSS	0.57297	0.48405	AT1G10780.2 | F-box/RNI-like superfamily protein | Chr1:3592875-3594328 REVERSE LENGTH=424 | 201606; PREDICTED: F-box protein At1g10780 isoform X1 [Fragaria vesca subsp. vesca]; sp|Q9SAC4|FB2_ARATH F-box protein At1g10780 OS=Arabidopsis thaliana OX=3702 GN=At1g10780 PE=2 SV=1; tr|A0A2P6PDB5|A0A2P6PDB5_ROSCH Putative F-box domain, leucine-rich repeat domain, L domain-containing protein OS=Rosa chi…	FAMILY NOT NAMED; F-box_dom; F-box domain; F-box-like; F-box-like_dom_sf; FvH4_5g29550.t1_v4.0.a2; LRR_dom_sf; protein binding; RNI-like;	protein binding	GO:0005515
TE_homo_28901	2.72187	0.00533333	Fvb2:21336309-21336750	Fvb2	21337638	21338177	FvH4_2g26601	+	889	Upstream TSS	NA	NA	AT5G45050.2 | Disease resistance protein (TIR-NBS-LRR class) | Chr5:18177016-18181805 REVERSE LENGTH=1344 | 201606; putative TIR domain, winged helix-turn-helix DNA-binding domain-containing protein [Rosa chinensis]; sp|Q9FL92|RRS1B_ARATH Disease resistance protein RRS1B OS=Arabidopsis thaliana OX=3702 GN=RRS1B PE=1 SV=1; tr|A0A2P6PXC4|A0A2P6PXC4_ROSCH Putative TIR domain, winged helix-turn-helix…	DISEASE RESISTANCE PROTEIN (TIR-NBS-LRR CLASS); FvH4_2g26601.t1_v4.0.a2; LEUCINE-RICH REPEAT-CONTAINING PROTEIN; &quot;Winged helix&quot; DNA-binding domain; WH_DNA-bd_sf	NA	NA
TE_homo_131733	2.78196	0.000932025	Fvb7:15541392-15541751	Fvb7	15538002	15540856	FvH4_7g18710	+	536	Downstream TTS	-2.24664	1.26265e-09	AT3G10405.1 | vacuolar acid trehalase | Chr3:3233978-3235118 REVERSE LENGTH=212 | 201606; PREDICTED: uncharacterized protein LOC101312783 [Fragaria vesca subsp. vesca]; tr|A0A2P6SJ73|A0A2P6SJ73_ROSCH Uncharacterized protein OS=Rosa chinensis OX=74649 GN=RchiOBHm_Chr1g0362491 PE=4 SV=1	DUF3783; FAMILY NOT NAMED; FvH4_7g18710.t1_v4.0.a2; UCP014543	NA	NA
TE_homo_103296	2.81271	0.000542305	Fvb6:9321494-9321899	Fvb6	9315912	9319682	FvH4_6g15010	-	1812	Upstream TSS	-0.224433	0.599958	AT4G12560.3 | F-box and associated interaction domains-containing protein | Chr4:7441815-7443157 FORWARD LENGTH=413 | 201606; PREDICTED: F-box protein CPR30-like isoform X2 [Fragaria vesca subsp. vesca]; sp|Q9SU30|CPR1_ARATH F-box protein CPR1 OS=Arabidopsis thaliana OX=3702 GN=CPR1 PE=1 SV=2; tr|A0A2P6RAG7|A0A2P6RAG7_ROSCH Putative F-box domain-containing protein OS=Rosa chinensis OX=74649 GN=Rc…	FAMILY NOT NAMED; FvH4_6g15010.t1_v4.0.a2;	NA	NA
TE_homo_103296	2.81271	0.000542305	Fvb6:9321494-9321899	Fvb6	9322664	9329304	FvH4_6g15020	+	766	Upstream TSS	-0.728851	0.844579	AT2G37290.3 | Ypt/Rab-GAP domain of gyp1p superfamily protein | Chr2:15656935-15661657 REVERSE LENGTH=882 | 201606; PREDICTED: EVI5-like protein isoform X2 [Fragaria vesca subsp. vesca]; sp|Q3UYK3|TBCD9_MOUSE TBC1 domain family member 9 OS=Mus musculus OX=10090 GN=Tbc1d9 PE=2 SV=2; tr|A0A2P6RAG3|A0A2P6RAG3_ROSCH Putative Rab-GTPase-TBC domain-containing protein OS=Rosa chinensis OX=74649 GN=RchiO…	Coil; disorder_prediction; FvH4_6g15020.t1_v4.0.a2; RabGAP-TBC; Rab-GTPase-TBC_dom; Rab-GTPase_TBC_sf; TBC1 DOMAIN FAMILY MEMBER GTPASE-ACTIVATING PROTEIN; TBC_RABGAP; Ypt/Rab-GAP domain of gyp1p; YPT/RAB-GAP DOMAIN OF GYP1P SUPERFAMILY PROTEIN	NA	NA
TE_homo_120890	2.81503	5.85198e-05	Fvb6:35293819-35294113	Fvb6	35291725	35293750	FvH4_6g46230	-	69	Upstream TSS	-2.43602	4.99074e-06	PREDICTED: uncharacterized protein LOC101308007 [Fragaria vesca subsp. vesca]; tr|A0A0F9DIR5|A0A0F9DIR5_9ZZZZ Uncharacterized protein (Fragment) OS=marine sediment metagenome OX=412755 GN=LCGC14_2194310 PE=4 SV=1	disorder_prediction; FvH4_6g46230.t1_v4.0.a2; Hexapep_transf_CS; HEXAPEP_TRANSFERASES; Synthesis of GDP-mannose; transferase activity; Trimeric LpxA-like enzymes; Trimer_LpxA-like_sf	transferase activity	GO:0016740
TE_homo_120890	2.81503	5.85198e-05	Fvb6:35293819-35294113	Fvb6	35286846	35292737	FvH4_6g46210	+	1082	Downstream TTS	-1.42921	3.45713e-08	AT3G30300.2 | O-fucosyltransferase family protein | Chr3:11921390-11924254 REVERSE LENGTH=677 | 201606; PREDICTED: uncharacterized protein At1g04910 [Fragaria vesca subsp. vesca]; sp|Q8GZ81|OFT27_ARATH O-fucosyltransferase 27 OS=Arabidopsis thaliana OX=3702 GN=OFUT27 PE=2 SV=1; tr|A0A2P6S3L1|A0A2P6S3L1_ROSCH Putative GDP-fucose protein O-fucosyltransferase OS=Rosa chinensis OX=74649 GN=RchiOBHm_C…	disorder_prediction; FAMILY NOT NAMED; FvH4_6g46210.t1_v4.0.a2; GDP-Fuc_O-FucTrfase; O-FUCOSYLTRANSFERASE 27; O-FucT	NA	NA
TE_homo_126723	2.82415	1.47715e-05	Fvb7:6607238-6607547	Fvb7	6603027	6605749	FvH4_7g06620	-	1489	Upstream TSS	NA	NA	PREDICTED: kinesin-related protein 4-like [Fragaria vesca subsp. vesca]	Coil; FvH4_7g06620.t1_v4.0.a2	NA	NA
TE_homo_118450	2.82558	0.0155594	Fvb6:30553116-30553537	Fvb6	30554037	30555400	FvH4_6g38601	+	501	Upstream TSS	NA	NA	AT3G06240.1 | F-box family protein | Chr3:1887336-1888619 FORWARD LENGTH=427 | 201606; PREDICTED: uncharacterized protein LOC101303656 [Fragaria vesca subsp. vesca] &gt;gi|764628813|ref|XP_004308602.2| PREDICTED: uncharacterized protein LOC101303656 [Fragaria vesca subsp. vesca]; tr|A0A251Q2J2|A0A251Q2J2_PRUPE Uncharacterized protein OS=Prunus persica OX=3760 GN=PRUPE_3G191300 PE=4 SV=1	FAMILY NOT NAMED; F-box-assoc_interact_dom; FvH4_6g38601.t1_v4.0.a2; ; TIGR01640	NA	NA
TE_homo_25557	2.83244	0.000603712	Fvb2:15244519-15245004	Fvb2	15242702	15244307	FvH4_2g17740	+	212	Downstream TTS	NA	NA	AT4G34370.1 | RING/U-box superfamily protein | Chr4:16434547-16437037 FORWARD LENGTH=597 | 201606; PREDICTED: probable E3 ubiquitin-protein ligase ARI1 [Fragaria vesca subsp. vesca]; sp|Q949V6|ARI1_ARATH Probable E3 ubiquitin-protein ligase ARI1 OS=Arabidopsis thaliana OX=3702 GN=ARI1 PE=2 SV=1; tr|A0A2P6PYF6|A0A2P6PYF6_ROSCH RBR-type E3 ubiquitin transferase OS=Rosa chinensis OX=74649 GN=RchiOBH…	disorder_prediction; E3 UBIQUITIN-PROTEIN LIGASE ARI2-RELATED; E3_UB_ligase_RBR; FvH4_2g17740.t1_v4.0.a2; IBR; IBR_dom; protein ubiquitination; RBR FAMILY RING FINGER AND IBR DOMAIN-CONTAINING; RING/U-box; TRIAD; ubiquitin-protein transferase activity; ZF_RING_2; Znf_RING; Znf_RING/FYVE/PHD	protein ubiquitination; ubiquitin-protein transferase activity	GO:0004842; GO:0016567
TE_homo_30866	2.90363	0.0249183	Fvb2:26493709-26493858	Fvb2	26493999	26496599	FvH4_2g36090	+	142	Upstream TSS	-2.49677	1.03527e-06	AT2G20142.1 | Toll-Interleukin-Resistance (TIR) domain family protein | Chr2:8695387-8696566 FORWARD LENGTH=313 | 201606; PREDICTED: uncharacterized protein LOC101311535 [Fragaria vesca subsp. vesca]; sp|Q40392|TMVRN_NICGU TMV resistance protein N OS=Nicotiana glutinosa OX=35889 GN=N PE=1 SV=1; tr|A0A2P6PS83|A0A2P6PS83_ROSCH Putative TIR domain-containing protein OS=Rosa chinensis OX=74649 GN=Rch…	FAMILY NOT NAMED; FvH4_2g36090.t1_v4.0.a2; protein binding; signal transduction; ; TIR; TIR_dom; Toll/Interleukin receptor TIR domain; Toll_tir_struct_dom_sf	protein binding; signal transduction	GO:0005515; GO:0007165
TE_homo_55987	2.97865	5.32596e-05	Fvb3:34776876-34777262	Fvb3	34774231	34774861	FvH4_3g41410	-	2015	Upstream TSS	NA	NA	NA	FvH4_3g41410.t1_v4.0.a2	NA	NA
TE_homo_55987	2.97865	5.32596e-05	Fvb3:34776876-34777262	Fvb3	34779511	34783454	FvH4_3g41420	+	2250	Upstream TSS	2.36882	3.66743e-12	AT1G55610.2 | BRI1 like | Chr1:20779874-20783374 REVERSE LENGTH=1166 | 201606; PREDICTED: receptor-like protein kinase BRI1-like 3 [Fragaria vesca subsp. vesca]; sp|Q9ZWC8|BRL1_ARATH Serine/threonine-protein kinase BRI1-like 1 OS=Arabidopsis thaliana OX=3702 GN=BRL1 PE=1 SV=1; tr|A0A2P6QL72|A0A2P6QL72_ROSCH Uncharacterized protein OS=Rosa chinensis OX=74649 GN=RchiOBHm_Chr5g0074401 PE=3 SV=1	ATP binding; FAMILY NOT NAMED; FvH4_3g41420.t1_v4.0.a2; Kinase-like_dom_sf; Leu-rich_rpt; Leu-rich_rpt_4; LRR_4; LRR_6; LRR_8; LRR_dom_sf; LRR_N_plant-typ; LRRNT_2; Pkinase; protein binding; protein kinase activity; PROTEIN_KINASE_ATP; Protein_kinase_ATP_BS; PROTEIN_KINASE_DOM; Protein kinase-like (PK-like); PROTEIN_KINASE_ST; protein phosphorylation; Prot_kinase_dom; RNI-like; SERINE/THREONINE-P…	ATP binding; protein binding; protein kinase activity; protein phosphorylation	GO:0004672; GO:0005515; GO:0005524; GO:0006468
TE_homo_86850	2.9891	0.0183412	Fvb5:12228315-12228711	Fvb5	12230421	12234475	FvH4_5g20620	-	1711	Downstream TTS	NA	NA	PREDICTED: uncharacterized protein LOC105350145 [Fragaria vesca subsp. vesca]; tr|A0A251PB03|A0A251PB03_PRUPE Uncharacterized protein OS=Prunus persica OX=3760 GN=PRUPE_5G199500 PE=4 SV=1	Coil; disorder_prediction; FAMILY NOT NAMED; FvH4_5g20620.t1_v4.0.a2;	NA	NA
TE_homo_46142	3.01389	0.00152483	Fvb3:22267047-22267389	Fvb3	22263703	22264183	FvH4_3g29142	+	2864	Downstream TTS	NA	NA	tr|A0A2P6Q8F7|A0A2P6Q8F7_ROSCH Uncharacterized protein OS=Rosa chinensis OX=74649 GN=RchiOBHm_Chr5g0024901 PE=4 SV=1	FvH4_3g29142.t1_v4.0.a2	NA	NA
TE_homo_123439	3.02192	0.000524461	Fvb7:1766165-1766409	Fvb7	1767198	1767756	FvH4_7g01350	+	790	Upstream TSS	NA	NA	AT2G43000.1 | NAC domain containing protein 42 | Chr2:17880617-17882584 REVERSE LENGTH=275 | 201606; sp|Q9SK55|NAC42_ARATH Transcription factor JUNGBRUNNEN 1 OS=Arabidopsis thaliana OX=3702 GN=JUB1 PE=1 SV=1; tr|A0A314Z824|A0A314Z824_PRUYE Transcription factor JUNGBRUNNEN 1-like OS=Prunus yedoensis var. nudiflora OX=2094558 GN=Pyn_01684 PE=4 SV=1; transcription factor JUNGBRUNNEN 1-like [Rosa chi…	DNA binding; FAMILY NOT NAMED; FvH4_7g01350.t1_v4.0.a2; NAC_dom_sf; regulation of transcription, DNA-templated;	DNA binding; regulation of DNA-templated transcription	GO:0003677; GO:0006355
TE_homo_59669	3.04228	5.32596e-05	Fvb4:2454874-2455053	Fvb4	2446593	2453920	FvH4_4g02690	-	954	Upstream TSS	-8.14335	6.60281e-32	AT5G43630.4 | zinc knuckle (CCHC-type) family protein | Chr5:17527261-17530207 FORWARD LENGTH=831 | 201606; PREDICTED: uncharacterized protein LOC101293145 isoform X2 [Fragaria vesca subsp. vesca]; tr|A0A2P6QQ99|A0A2P6QQ99_ROSCH Putative transcription factor interactor and regulator CCHC(Zn) family OS=Rosa chinensis OX=74649 GN=RchiOBHm_Chr4g0390511 PE=4 SV=1	disorder_prediction; DNA binding; E3 ubiquitin ligases ubiquitinate target proteins; Formation of RNA Pol II elongation complex; FvH4_4g02690.t1_v4.0.a2; FvH4_4g02690.t3_v4.0.a2; Plus-3; PLUS3; Plus-3_dom; Plus3-like; Plus3-like_sf; RNA Polymerase II Pre-transcription Events; RNA Polymerase II Transcription Elongation; UNCHARACTERIZED; ZINC KNUCKLE (CCHC-TYPE) FAMILY PROTEIN	DNA binding	GO:0003677
TE_homo_59669	3.04228	5.32596e-05	Fvb4:2454874-2455053	Fvb4	2457778	2458595	FvH4_4g02691	-	2726	Downstream TTS	2.99997	0.305451	NA	FvH4_4g02691.t1_v4.0.a2	NA	NA
TE_homo_76852	3.04594	0.0104854	Fvb4:23713194-23713636	Fvb4	23710790	23711303	FvH4_4g20440	-	1891	Upstream TSS	NA	NA	AT1G47960.2 | cell wall / vacuolar inhibitor of fructosidase 1 | Chr1:17682425-17683516 REVERSE LENGTH=166 | 201606; PREDICTED: cell wall / vacuolar inhibitor of fructosidase 1 [Fragaria vesca subsp. vesca]; sp|F4HWQ8|CVIF1_ARATH Cell wall / vacuolar inhibitor of fructosidase 1 OS=Arabidopsis thaliana OX=3702 GN=C/VIF1 PE=1 SV=1; tr|A0A2I4GTK9|A0A2I4GTK9_JUGRE cell wall / vacuolar inhibitor of fr…	CELL WALL / VACUOLAR INHIBITOR OF FRUCTOSIDASE 1; CIF_like; C/VIF1; enzyme inhibitor activity; FAMILY NOT NAMED; FvH4_4g20440.t1_v4.0.a2; Invertase/methylesterase_inhib; negative regulation of catalytic activity; Pectinesterase_inhib_dom; Plant invertase/pectin methylesterase inhibitor; PMEI; TIGR01614	enzyme inhibitor activity; negative regulation of catalytic activity	GO:0004857; GO:0043086
TE_homo_76852	3.04594	0.0104854	Fvb4:23713194-23713636	Fvb4	23712331	23712595	FvH4_4g20450	-	599	Upstream TSS	1.34809	0.0730287	AT5G49525.1 | transmembrane protein | Chr5:20097132-20097374 REVERSE LENGTH=80 | 201606; PREDICTED: uncharacterized protein LOC105350667 [Fragaria vesca subsp. vesca]; tr|A0A2P6QZA9|A0A2P6QZA9_ROSCH Uncharacterized protein OS=Rosa chinensis OX=74649 GN=RchiOBHm_Chr4g0425921 PE=4 SV=1	FAMILY NOT NAMED; FvH4_4g20450.t1_v4.0.a2;	NA	NA
TE_homo_76852	3.04594	0.0104854	Fvb4:23713194-23713636	Fvb4	23714914	23718358	FvH4_4g20460	+	1279	Upstream TSS	-0.421749	0.563959	AT1G47970.1 | nucleolin | Chr1:17687342-17688562 FORWARD LENGTH=198 | 201606; PREDICTED: prostatic spermine-binding protein-like [Fragaria vesca subsp. vesca]; tr|A0A1S4APY6|A0A1S4APY6_TOBAC prostatic spermine-binding protein-like OS=Nicotiana tabacum OX=4097 GN=LOC107800018 PE=4 SV=1	disorder_prediction; FAMILY NOT NAMED; FvH4_4g20460.t1_v4.0.a2	NA	NA
TE_homo_94141	3.06595	5.40197e-05	Fvb5:22453475-22453769	Fvb5	22450253	22451018	FvH4_5g31471	+	2457	Downstream TTS	NA	NA	NA	disorder_prediction; FvH4_5g31471.t1_v4.0.a2	NA	NA
TE_homo_34207	3.11899	5.32596e-05	Fvb3:5586279-5586653	Fvb3	5589644	5593271	FvH4_3g09620	+	2992	Upstream TSS	NA	NA	AT4G05460.1 | RNI-like superfamily protein | Chr4:2761106-2762400 REVERSE LENGTH=302 | 201606; putative F-box domain, leucine-rich repeat domain, L domain-containing protein [Rosa chinensis]; sp|Q9M0U9|SKI19_ARATH F-box protein SKIP19 OS=Arabidopsis thaliana OX=3702 GN=SKIP19 PE=1 SV=1; tr|A0A2P6Q5Y2|A0A2P6Q5Y2_ROSCH Putative F-box domain, leucine-rich repeat domain, L domain-containing protein O…	FAMILY NOT NAMED; F-box; FBOX; F-box_dom; F-box domain; F-box-like; F-box-like_dom_sf; F-BOX PROTEIN SKIP19; FvH4_3g09620.t1_v4.0.a2; Leu-rich_rpt; LRR_6; LRR_dom_sf; protein binding; RNI-like	protein binding	GO:0005515
TE_homo_95632	3.16979	2.35391e-05	Fvb5:24794273-24794557	Fvb5	24793462	24794218	FvH4_5g34112	+	55	Downstream TTS	NA	NA	tr|A0A059ANB4|A0A059ANB4_EUCGR Uncharacterized protein OS=Eucalyptus grandis OX=71139 GN=EUGRSUZ_I01257 PE=4 SV=1	FvH4_5g34112.t1_v4.0.a2	NA	NA
TE_homo_124084	3.19588	0.00293776	Fvb7:2663706-2664018	Fvb7	2665535	2667704	FvH4_7g02370	-	1518	Downstream TTS	-1.96849	8.82521e-06	AT1G52340.1 | NAD(P)-binding Rossmann-fold superfamily protein | Chr1:19489997-19491527 REVERSE LENGTH=285 | 201606; PREDICTED: xanthoxin dehydrogenase [Fragaria vesca subsp. vesca]; sp|Q9C826|ABA2_ARATH Xanthoxin dehydrogenase OS=Arabidopsis thaliana OX=3702 GN=ABA2 PE=1 SV=1; tr|A0A2P6S8L1|A0A2P6S8L1_ROSCH Putative xanthoxin dehydrogenase OS=Rosa chinensis OX=74649 GN=RchiOBHm_Chr1g0319721 PE=4…	adh_short_C2; FAMILY NOT NAMED; FvH4_7g02370.t1_v4.0.a2; GDHRDH; NAD(P)-bd_dom_sf; NAD(P)-binding Rossmann-fold domains; SDR_fam; SDRFAMILY; secoisolariciresinol-DH_like_SDR_c; XANTHOXIN DEHYDROGENASE	NA	NA
TE_homo_29701	3.20834	0.0418907	Fvb2:23455232-23455558	Fvb2	23453299	23453825	FvH4_2g30320	-	1407	Upstream TSS	NA	NA	AT1G66370.1 | myb domain protein 113 | Chr1:24753634-24754604 FORWARD LENGTH=246 | 201606; putative transcription factor MYB-HB-like family [Rosa chinensis]; sp|Q9FNV9|MY113_ARATH Transcription factor MYB113 OS=Arabidopsis thaliana OX=3702 GN=MYB113 PE=1 SV=1; tr|A0A2P6QWN1|A0A2P6QWN1_ROSCH Putative transcription factor MYB-HB-like family OS=Rosa chinensis OX=74649 GN=RchiOBHm_Chr4g0415831 PE=4 S…	DNA binding; FvH4_2g30320.t1_v4.0.a2; Homeobox-like_sf; Homeodomain-like; Myb_DNA-bind_6; MYB-LIKE DNA-BINDING PROTEIN MYB; Myb-like_TF; TRANSCRIPTION FACTOR MYB113-RELATED	DNA binding	GO:0003677
TE_struc_1951	3.27493	0.0296589	Fvb5:3155883-3156303	Fvb5	3157125	3163245	FvH4_5g05380	+	823	Upstream TSS	-2.06074	4.00144e-08	AT4G27190.1 | NB-ARC domain-containing disease resistance protein | Chr4:13620977-13623934 REVERSE LENGTH=985 | 201606; PREDICTED: disease resistance protein At4g27190-like [Fragaria vesca subsp. vesca]; sp|Q9T048|DRL27_ARATH Disease resistance protein At4g27190 OS=Arabidopsis thaliana OX=3702 GN=At4g27190 PE=2 SV=1; tr|A0A2P6QS64|A0A2P6QS64_ROSCH Putative P-loop containing nucleoside triphosphat…	Activation of caspases through apoptosome-mediated cleavage; ADP binding; Coil; DISEASERSIST; FAMILY NOT NAMED; Formation of apoptosome; FvH4_5g05380.t1_v4.0.a2; L domain-like; LRR_dom_sf; NB-ARC; Neutrophil degranulation; P-loop containing nucleoside triphosphate hydrolases; P-loop_NTPase; Regulation of the apoptosome activity; RNI-like; ; SMAC (DIABLO) binds to IAPs; SMAC(DIABLO)-mediated disso…	ADP binding	GO:0043531
TE_homo_32796	3.2794	3.22238e-05	Fvb3:2697100-2697499	Fvb3	2699089	2701388	FvH4_3g04720	+	1591	Upstream TSS	0.933005	0.115937	AT1G61065.1 | 1%2C3-beta-glucan synthase component (DUF1218) | Chr1:22490430-22491330 REVERSE LENGTH=180 | 201606; PREDICTED: uncharacterized protein LOC101314921 [Fragaria vesca subsp. vesca]; tr|A0A2P6Q3X3|A0A2P6Q3X3_ROSCH Uncharacterized protein OS=Rosa chinensis OX=74649 GN=RchiOBHm_Chr5g0007741 PE=4 SV=1	1,3-BETA-GLUCAN SYNTHASE COMPONENT (DUF1218); DUF1218; FAMILY NOT NAMED; FvH4_3g04720.t1_v4.0.a2; Modifying_wall_lignin1/2	NA	NA
TE_homo_32796	3.2794	3.22238e-05	Fvb3:2697100-2697499	Fvb3	2695814	2696647	FvH4_3g04710	+	453	Downstream TTS	-7.43754	0.000123935	NA	FvH4_3g04710.t1_v4.0.a2	NA	NA
TE_homo_85987	3.30675	0.00153007	Fvb5:10817927-10818342	Fvb5	10809496	10817464	FvH4_5g18830	-	463	Upstream TSS	1.4047	2.72172e-06	AT2G35720.1 | DNAJ heat shock N-terminal domain-containing protein | Chr2:15016883-15019866 FORWARD LENGTH=538 | 201606; PREDICTED: chaperone protein dnaJ 13 [Fragaria vesca subsp. vesca]; sp|Q39079|DNJ13_ARATH Chaperone protein dnaJ 13 OS=Arabidopsis thaliana OX=3702 GN=ATJ13 PE=1 SV=2; tr|A0A2P6P8D9|A0A2P6P8D9_ROSCH Putative dnaJ-like protein C11 OS=Rosa chinensis OX=74649 GN=RchiOBHm_Chr7g0203…	AtJ13; Chaperone J-domain; Coil; Cristae formation; DnaJ; DNAJ_1; DNAJ_2; DnaJ_domain; DnaJ_domain_CS; DnaJ-like_C11_C; DUF3395; FAMILY NOT NAMED; FvH4_5g18830.t1_v4.0.a2; JDOMAIN; J_dom_sf	NA	NA
TE_homo_85987	3.30675	0.00153007	Fvb5:10817927-10818342	Fvb5	10821011	10822751	FvH4_5g18832	+	2670	Upstream TSS	NA	NA	AT3G09510.1 | Ribonuclease H-like superfamily protein | Chr3:2921804-2923258 FORWARD LENGTH=484 | 201606; PREDICTED: uncharacterized protein LOC105350106 [Fragaria vesca subsp. vesca]; tr|M5VTR3|M5VTR3_PRUPE Uncharacterized protein (Fragment) OS=Prunus persica OX=3760 GN=PRUPE_ppb016510mg PE=4 SV=1	DNase I-like; Endo/exonu/phosph_ase_sf; FAMILY NOT NAMED; FvH4_5g18832.t1_v4.0.a2; nucleic acid binding; RNA-DNA hybrid ribonuclease activity; RNaseH_domain; RNase_H_like; RVT_3; RVT-Znf; zf-RVT	nucleic acid binding; RNA-DNA hybrid ribonuclease activity	GO:0003676; GO:0004523
TE_struc_582	3.37104	0.000323651	Fvb2:13603709-13604187	Fvb2	13605799	13609098	FvH4_2g15460	+	1613	Upstream TSS	NA	NA	AT2G16910.1 | basic helix-loop-helix (bHLH) DNA-binding superfamily protein | Chr2:7331721-7334077 FORWARD LENGTH=571 | 201606; PREDICTED: transcription factor ABORTED MICROSPORES-like isoform X2 [Fragaria vesca subsp. vesca]; sp|Q9ZVX2|AMS_ARATH Transcription factor ABORTED MICROSPORES OS=Arabidopsis thaliana OX=3702 GN=AMS PE=1 SV=2; tr|A0A2P6PSS1|A0A2P6PSS1_ROSCH Putative transcription factor …	ACT_UUR-ACR-like; BHLH; bHLH_dom; bHLH-MYC_N; Coil; disorder_prediction; FAMILY NOT NAMED; FvH4_2g15460.t1_v4.0.a2; HLH; HLH_DNA-bd_sf; HLH, helix-loop-helix DNA-binding domain; MYC/MYB_N; protein dimerization activity; TRANSCRIPTION FACTOR ABORTED MICROSPORES	protein dimerization activity	GO:0046983
TE_homo_41101	3.44496	6.5078e-06	Fvb3:16490079-16490371	Fvb3	16484001	16489567	FvH4_3g23480	+	512	Downstream TTS	-0.64729	3.09983e-05	AT3G20290.3 | EPS15 homology domain 1 | Chr3:7075057-7078655 REVERSE LENGTH=545 | 201606; PREDICTED: EH domain-containing protein 1 isoform X2 [Fragaria vesca subsp. vesca]; sp|Q94CF0|EHD1_ARATH EH domain-containing protein 1 OS=Arabidopsis thaliana OX=3702 GN=EHD1 PE=1 SV=1; tr|A0A2P6QCS4|A0A2P6QCS4_ROSCH Putative EH domain-containing protein OS=Rosa chinensis OX=74649 GN=RchiOBHm_Chr5g0041321 P…	calcium ion binding; Coil; DUF5600; Dynamin_N; Dynamin_SF; EF-hand; EF_HAND_2; EF-hand_4; EF_hand_dom; EF-hand-dom_pair; EH; EHD; EHD_N; EH_dom; EH DOMAIN; FvH4_3g23480.t1_v4.0.a2; G_DYNAMIN_2; G_DYNAMIN_dom; GTP binding; P-loop containing nucleoside triphosphate hydrolases; P-loop_NTPase; protein binding;	calcium ion binding; GTP binding; protein binding	GO:0005509; GO:0005515; GO:0005525
TE_homo_37291	3.48085	0.0414808	Fvb3:11035483-11035749	Fvb3	11032600	11033558	FvH4_3g17320	+	1925	Downstream TTS	-1.487	0.0593866	PREDICTED: mediator of RNA polymerase II transcription subunit 19a-like [Fragaria vesca subsp. vesca]	disorder_prediction; FvH4_3g17320.t1_v4.0.a2	NA	NA
TE_homo_99497	3.55532	0.00528485	Fvb6:2205606-2205930	Fvb6	2202300	2205361	FvH4_6g04050	+	245	Downstream TTS	0.161904	0.87222	AT1G11290.1 | Pentatricopeptide repeat (PPR) superfamily protein | Chr1:3791454-3793883 REVERSE LENGTH=809 | 201606; PREDICTED: putative pentatricopeptide repeat-containing protein At5g52630 [Fragaria vesca subsp. vesca]; sp|Q3E6Q1|PPR32_ARATH Pentatricopeptide repeat-containing protein At1g11290, chloroplastic OS=Arabidopsis thaliana OX=3702 GN=PCMP-H40 PE=2 SV=1; tr|A0A2P6R6B4|A0A2P6R6B4_ROSCH …	DYW_deaminase; DYW_dom; FAMILY NOT NAMED; FvH4_6g04050.t1_v4.0.a2; Pentatricopeptide_repeat; PPR; PPR_2; protein binding; TIGR00756; TPR-like_helical_dom_sf; zinc ion binding	protein binding; zinc ion binding	GO:0005515; GO:0008270
TE_homo_9512	3.58371	4.93076e-05	Fvb1:18337804-18337966	Fvb1	18331406	18335312	FvH4_1g26510	-	2492	Upstream TSS	-2.02344	5.84282e-07	AT1G10660.4 | transmembrane protein | Chr1:3533009-3534781 FORWARD LENGTH=320 | 201606; PREDICTED: uncharacterized protein LOC101295079 [Fragaria vesca subsp. vesca]; tr|A0A2P6RF96|A0A2P6RF96_ROSCH Uncharacterized protein OS=Rosa chinensis OX=74649 GN=RchiOBHm_Chr3g0486601 PE=4 SV=1	FvH4_1g26510.t1_v4.0.a2; ; UNCHARACTERIZED	NA	NA
TE_homo_27314	3.60513	0.000492576	Fvb2:18112303-18112478	Fvb2	18115173	18116229	FvH4_2g21940	+	2696	Upstream TSS	NA	NA	AT3G58190.1 | lateral organ boundaries-domain 29 | Chr3:21548716-21549488 REVERSE LENGTH=218 | 201606; PREDICTED: LOB domain-containing protein 29-like [Fragaria vesca subsp. vesca]; sp|Q9M2J7|LBD29_ARATH LOB domain-containing protein 29 OS=Arabidopsis thaliana OX=3702 GN=LBD29 PE=2 SV=1; tr|A0A2P6PVF9|A0A2P6PVF9_ROSCH Putative transcription factor AS2-LOB family OS=Rosa chinensis OX=74649 GN=Rch…	Coil; FvH4_2g21940.t1_v4.0.a2; LOB; LOB DOMAIN CONTAINING PROTEIN;	NA	NA
TE_homo_131661	3.61652	1.91608e-13	Fvb7:15464894-15465309	Fvb7	15467223	15471989	FvH4_7g18570	+	1915	Upstream TSS	17.8072	9.31738e-36	AT3G26040.1 | HXXXD-type acyl-transferase family protein | Chr3:9519741-9521069 FORWARD LENGTH=442 | 201606; PREDICTED: vinorine synthase-like [Fragaria vesca subsp. vesca]; sp|Q70PR7|VINSY_RAUSE Vinorine synthase OS=Rauvolfia serpentina OX=4060 GN=ACT PE=1 SV=2; tr|A0A1J0CLC8|A0A1J0CLC8_FRAAN Alcohol acyltransferase OS=Fragaria ananassa OX=3747 GN=AAT PE=2 SV=1	CAT-like_dom_sf; FAMILY NOT NAMED; FvH4_7g18570.t1_v4.0.a2; Glyoxylate metabolism and glycine degradation; ; Transferase; transferase activity, transferring acyl groups other than amino-acyl groups	acyltransferase activity, transferring groups other than amino-acyl groups	GO:0016747
TE_homo_131661	3.61652	1.91608e-13	Fvb7:15464894-15465309	Fvb7	15459592	15462054	FvH4_7g18550	+	2840	Downstream TTS	6.60147	0.000136975	AT3G54940.2 | Papain family cysteine protease | Chr3:20354402-20356127 FORWARD LENGTH=367 | 201606; probable cysteine protease RD19D [Rosa chinensis] &gt;gi|1358184243|gb|PRQ58717.1| putative cathepsin L [Rosa chinensis]; sp|Q8VYS0|RD19D_ARATH Probable cysteine protease RD19D OS=Arabidopsis thaliana OX=3702 GN=RD19D PE=2 SV=1; tr|A0A2P6SJ69|A0A2P6SJ69_ROSCH Putative cathepsin L OS=Rosa chinensis …	CYSTEINE PROTEASE FAMILY C1-RELATED; Cysteine proteinases; cysteine-type peptidase activity; FvH4_7g18550.t1_v4.0.a2; Inhibitor_I29; MHC class II antigen presentation; PAPAIN; Papain-like_cys_pep_sf; Pept_asp_AS; Pept_cys_AS; Pept_his_AS; Peptidase_C1; Peptidase_C1A; Peptidase_C1A_C; Peptidase_C1A_papain-like; proteolysis; Prot_inhib_I29; ; THIOL_PROTEASE_ASN; THIOL_PROTEASE_CYS; THIOL_PROTEASE_H…	cysteine-type peptidase activity; proteolysis	GO:0006508; GO:0008234
TE_homo_40187	3.67112	0.000603712	Fvb3:15342515-15342843	Fvb3	15344619	15347242	FvH4_3g22321	+	1777	Upstream TSS	1.4805	0.0125072	AT1G32120.1 | serine/threonine-protein phosphatase 7 long form-like protein | Chr1:11552926-11555942 FORWARD LENGTH=978 | 201606; PREDICTED: uncharacterized protein LOC105350524 [Fragaria vesca subsp. vesca]; tr|A0A2P6QC30|A0A2P6QC30_ROSCH Uncharacterized protein OS=Rosa chinensis OX=74649 GN=RchiOBHm_Chr5g0038781 PE=4 SV=1	AminoTfrase-like_pln_mobile; AMINOTRANSFERASE-LIKE, PLANT MOBILE DOMAIN FAMILY PROTEIN; Coil; disorder_prediction; FAMILY NOT NAMED; FvH4_3g22321.t1_v4.0.a2; PMD	NA	NA
TE_homo_40187	3.67112	0.000603712	Fvb3:15342515-15342843	Fvb3	15339842	15340620	FvH4_3g22310	+	1895	Downstream TTS	NA	NA	NA	FvH4_3g22310.t1_v4.0.a2	NA	NA
TE_homo_85008	3.68283	0.0414808	Fvb5:8848215-8848325	Fvb5	8849174	8852527	FvH4_5g15660	+	850	Upstream TSS	NA	NA	AT5G28470.2 | Major facilitator superfamily protein | Chr5:10429813-10432357 FORWARD LENGTH=561 | 201606; protein NRT1/ PTR FAMILY 2.8 [Rosa chinensis] &gt;gi|1358141613|gb|PRQ16093.1| putative proton-dependent oligopeptide transporter family, major facilitator superfamily [Rosa chinensis]; sp|Q3E8X3|PTR52_ARATH Protein NRT1/ PTR FAMILY 2.8 OS=Arabidopsis thaliana OX=3702 GN=NPF2.8 PE=2 SV=2; tr|…	disorder_prediction; FvH4_5g15660.t1_v4.0.a2; FvH4_5g15660.t2_v4.0.a2; membrane; MFS general substrate transporter; MFS_trans_sf; OLIGOPEPTIDE TRANSPORTER-RELATED; POT_fam; PROTEIN NRT1/ PTR FAMILY 2.8; Proton/oligopeptide cotransporters; PTR2; transmembrane transport; transmembrane transporter activity	membrane; transmembrane transport; transmembrane transporter activity	GO:0016020; GO:0022857; GO:0055085
TE_homo_86611	3.71818	0.0328032	Fvb5:11767923-11768276	Fvb5	11769202	11770680	FvH4_5g19970	+	927	Upstream TSS	NA	NA	AT4G25420.1 | 2-oxoglutarate (2OG) and Fe(II)-dependent oxygenase superfamily protein | Chr4:12990982-12992409 REVERSE LENGTH=377 | 201606; PREDICTED: gibberellin 20 oxidase 1-like [Fragaria vesca subsp. vesca]; sp|Q39110|GAOX1_ARATH Gibberellin 20 oxidase 1 OS=Arabidopsis thaliana OX=3702 GN=GA20OX1 PE=2 SV=2; tr|A0A314YLH2|A0A314YLH2_PRUYE Gibberellin 20 oxidase 1-like OS=Prunus yedoensis var. …	2OG-FeII_Oxy; Clavaminate synthase-like; DIOX_N; FE2OG_OXY; FvH4_5g19970.t1_v4.0.a2; IPNS-like; oxidation-reduction process; OXIDOREDUCTASE, 2OG-FE II OXYGENASE FAMILY PROTEIN; oxidoreductase activity; Oxoglu/Fe-dep_dioxygenase;	obsolete oxidation-reduction process; oxidoreductase activity	GO:0016491; GO:0055114
TE_homo_86611	3.71818	0.0328032	Fvb5:11767923-11768276	Fvb5	11765807	11766645	FvH4_5g19960	+	1278	Downstream TTS	NA	NA	AT4G02320.1 | Plant invertase/pectin methylesterase inhibitor superfamily | Chr4:1022725-1026118 REVERSE LENGTH=518 | 201606; PREDICTED: probable pectinesterase/pectinesterase inhibitor 12 [Fragaria vesca subsp. vesca]; sp|O81301|PME40_ARATH Probable pectinesterase/pectinesterase inhibitor 40 OS=Arabidopsis thaliana OX=3702 GN=PME40 PE=2 SV=1; tr|A0A1U7X2P7|A0A1U7X2P7_NICSY pectinesterase-like OS…	cell wall modification; FAMILY NOT NAMED; FvH4_5g19960.t1_v4.0.a2; Pectin degradation I; Pectin degradation II; Pectinesterase; pectinesterase activity; Pectinesterase_cat; Pectin_lyase_fold/virulence; Pectin lyase-like; Pectin_lyas_fold; Pentose and glucuronate interconversions;	cell wall modification; pectinesterase activity	GO:0030599; GO:0042545
TE_homo_23092	3.73682	0.0159559	Fvb2:11784021-11784396	Fvb2	11782008	11783699	FvH4_2g13500	-	322	Upstream TSS	0.0352122	0.973764	AT2G14095.1 | hypothetical protein | Chr2:5932506-5933752 REVERSE LENGTH=234 | 201606; PREDICTED: uncharacterized protein LOC101310960 [Fragaria vesca subsp. vesca]; tr|A0A2P6PGZ6|A0A2P6PGZ6_ROSCH Uncharacterized protein OS=Rosa chinensis OX=74649 GN=RchiOBHm_Chr7g0236611 PE=4 SV=1	Coil; EXPRESSED PROTEIN; FAMILY NOT NAMED; FvH4_2g13500.t1_v4.0.a2	NA	NA
TE_homo_120489	3.74354	0.000526464	Fvb6:34302255-34302547	Fvb6	34298579	34299291	FvH4_6g44540	-	2964	Upstream TSS	NA	NA	AT3G63310.1 | Bax inhibitor-1 family protein | Chr3:23387938-23388882 REVERSE LENGTH=239 | 201606; PREDICTED: BI1-like protein [Fragaria vesca subsp. vesca]; sp|Q9M1V9|LFG2_ARATH Protein LIFEGUARD 2 OS=Arabidopsis thaliana OX=3702 GN=LFG2 PE=2 SV=1; tr|A0A2P6PVT2|A0A2P6PVT2_ROSCH Uncharacterized protein OS=Rosa chinensis OX=74649 GN=RchiOBHm_Chr6g0290181 PE=3 SV=1	Bax1-I; Bax_inhibitor_1-related; BAX INHIBITOR-RELATED; FvH4_6g44540.t1_v4.0.a2;	NA	NA
TE_homo_120489	3.74354	0.000526464	Fvb6:34302255-34302547	Fvb6	34304075	34304608	FvH4_6g44541	+	1529	Upstream TSS	NA	NA	AT4G16740.1 | terpene synthase 03 | Chr4:9407856-9410877 FORWARD LENGTH=565 | 201606; PREDICTED: tricyclene synthase EBOS, chloroplastic-like [Fragaria vesca subsp. vesca]; sp|B9T825|TPS12_RICCO Probable terpene synthase 12 OS=Ricinus communis OX=3988 GN=TPS12 PE=3 SV=1; tr|A0A2P6REV6|A0A2P6REV6_ROSCH Putative lyase OS=Rosa chinensis OX=74649 GN=RchiOBHm_Chr3g0484891 PE=3 SV=1	FAMILY NOT NAMED; FvH4_6g44541.t1_v4.0.a2; lyase activity; ; Terpene_synth; terpene synthase activity; Terpene_synth_N; Terpene_synth_N_sf; Terpenoid_cyclase/PrenylTrfase; Terpenoid cyclases/Protein prenyltransferases	lyase activity; terpene synthase activity	GO:0010333; GO:0016829
TE_homo_116160	3.74559	0.0303711	Fvb6:26695234-26695535	Fvb6	26689622	26693013	FvH4_6g33670	-	2221	Upstream TSS	0.125581	0.819558	AT1G17640.3 | RNA-binding (RRM/RBD/RNP motifs) family protein | Chr1:6067394-6069098 REVERSE LENGTH=369 | 201606; PREDICTED: heterogeneous nuclear ribonucleoprotein 1 [Fragaria vesca subsp. vesca]; sp|Q8W034|RNP1_ARATH Heterogeneous nuclear ribonucleoprotein 1 OS=Arabidopsis thaliana OX=3702 GN=RNP1 PE=1 SV=1; tr|A0A2P6RY63|A0A2P6RY63_ROSCH Putative nucleotide-binding alpha-beta plait domain-cont…	BOULE/DAZ; BOULE-RELATED; disorder_prediction; FvH4_6g33670.t1_v4.0.a2; GENE 17190-RELATED; germ cell development; mRNA binding; nucleic acid binding; Nucleotide-bd_a/b_plait_sf; RBD_domain_sf; RNA-binding domain, RBD; RRM; RRM_1; RRM_dom	germ cell development; mRNA binding; nucleic acid binding	GO:0003676; GO:0003729; GO:0007281
TE_homo_23016	3.75633	0.00255573	Fvb2:11645206-11645622	Fvb2	11642906	11643296	FvH4_2g13341	+	1910	Downstream TTS	NA	NA	NA	FvH4_2g13341.t1_v4.0.a2	NA	NA
TE_homo_114465	3.80166	0.000316291	Fvb6:24191902-24192165	Fvb6	24186092	24189672	FvH4_6g31000	-	2230	Upstream TSS	0.885977	0.000150047	AT1G52380.4 | NUP50 (Nucleoporin 50 kDa) protein | Chr1:19509979-19511301 FORWARD LENGTH=440 | 201606; PREDICTED: nuclear pore complex protein NUP50A [Fragaria vesca subsp. vesca]; sp|Q9C829|NU50A_ARATH Nuclear pore complex protein NUP50A OS=Arabidopsis thaliana OX=3702 GN=NUP50A PE=1 SV=1; tr|A0A314Y115|A0A314Y115_PRUYE Nuclear pore complex protein NUP50A OS=Prunus yedoensis var. nudiflora OX=20…	Defective TPR may confer susceptibility towards thyroid papillary carcinoma (TPC); disorder_prediction; FvH4_6g31000.t1_v4.0.a2; intracellular transport; ISG15 antiviral mechanism; NEP/NS2 Interacts with the Cellular Export Machinery; NS1 Mediated Effects on Host Pathways; Nuclear import of Rev protein; nuclear pore; Nuclear Pore Complex (NPC) Disassembly; NUCLEAR PORE COMPLEX PROTEIN NUP50A-RELA…	intracellular transport; nuclear pore	GO:0005643; GO:0046907
TE_homo_88749	3.82883	1.78607e-05	Fvb5:15250949-15251368	Fvb5	15254307	15258330	FvH4_5g23970	-	2940	Downstream TTS	-1.24055	0.0125283	AT1G08400.1 | RINT-1 / TIP-1 family | Chr1:2643348-2646005 REVERSE LENGTH=804 | 201606; PREDICTED: RINT1-like protein MAG2L [Fragaria vesca subsp. vesca]; sp|Q8GXP1|MAG2L_ARATH RINT1-like protein MAG2L OS=Arabidopsis thaliana OX=3702 GN=MAG2L PE=2 SV=1; tr|A0A2P6PB03|A0A2P6PB03_ROSCH Uncharacterized protein OS=Rosa chinensis OX=74649 GN=RchiOBHm_Chr7g0213411 PE=4 SV=1	COPI-dependent Golgi-to-ER retrograde traffic; endoplasmic reticulum; FvH4_5g23970.t1_v4.0.a2; Golgi vesicle transport; RAD50-INTERACTING PROTEIN 1 RINT-1; RINT1-LIKE PROTEIN MAG2; RINT1_TIP1; RINT1_Tip20; RINT1_TIP20	endoplasmic reticulum; Golgi vesicle transport	GO:0005783; GO:0048193
TE_homo_112695	3.88437	2.02769e-05	Fvb6:21799725-21800023	Fvb6	21796424	21798295	FvH4_6g28320	-	1430	Upstream TSS	NA	NA	leucine-rich repeat extensin-like protein 2 [Rosa chinensis] &gt;gi|1358175889|gb|PRQ50364.1| hypothetical protein RchiOBHm_Chr2g0132371 [Rosa chinensis]; tr|A0A2P6RVB5|A0A2P6RVB5_ROSCH Uncharacterized protein OS=Rosa chinensis OX=74649 GN=RchiOBHm_Chr2g0132371 PE=4 SV=1	disorder_prediction; FvH4_6g28320.t1_v4.0.a2	NA	NA
TE_homo_77708	3.88561	0.0294048	Fvb4:25224096-25224458	Fvb4	25226645	25229163	FvH4_4g22390	+	2188	Upstream TSS	-5.4193	0.342211	hypothetical protein RchiOBHm_Chr4g0428591 [Rosa chinensis]; tr|A0A2P6QZY4|A0A2P6QZY4_ROSCH Uncharacterized protein OS=Rosa chinensis OX=74649 GN=RchiOBHm_Chr4g0428591 PE=4 SV=1	FvH4_4g22390.t1_v4.0.a2	NA	NA
TE_homo_58262	3.89025	1.55982e-12	Fvb4:474662-474845	Fvb4	475826	478208	FvH4_4g00530	+	982	Upstream TSS	NA	NA	AT3G22980.3 | Ribosomal protein S5/Elongation factor G/III/V family protein | Chr3:8160269-8163316 REVERSE LENGTH=1015 | 201606; putative protein-synthesizing GTPase [Rosa chinensis]; sp|Q7Z2Z2|EFL1_HUMAN Elongation factor-like GTPase 1 OS=Homo sapiens OX=9606 GN=EFL1 PE=1 SV=2; tr|A0A2P6PRW3|A0A2P6PRW3_ROSCH Uncharacterized protein OS=Rosa chinensis OX=74649 GN=RchiOBHm_Chr6g0274771 PE=4 SV=1	disorder_prediction; FAMILY NOT NAMED; FvH4_4g00530.t1_v4.0.a2;	NA	NA
TE_homo_58262	3.89025	1.55982e-12	Fvb4:474662-474845	Fvb4	466457	474236	FvH4_4g00520	+	426	Downstream TTS	1.33432	0.000391826	AT2G32700.6 | LEUNIG-like protein | Chr2:13867235-13871844 FORWARD LENGTH=785 | 201606; PREDICTED: transcriptional corepressor LEUNIG [Fragaria vesca subsp. vesca] &gt;gi|764570217|ref|XP_011462525.1| PREDICTED: transcriptional corepressor LEUNIG [Fragaria vesca subsp. vesca]; sp|O48847|LUH_ARATH Transcriptional corepressor LEUNIG_HOMOLOG OS=Arabidopsis thaliana OX=3702 GN=LUH PE=1 SV=1; tr|A0A2P…	Coil; disorder_prediction; FAMILY NOT NAMED; FvH4_4g00520.t1_v4.0.a2; G-protein_beta_WD-40_rep; GPROTEINBRPT; LisH; protein binding; TRANSCRIPTIONAL COREPRESSOR LEUNIG_HOMOLOG; WD40; WD40_repeat; WD40_repeat_CS; WD40_repeat_dom; WD40_repeat_dom_sf; WD40 repeat-like; WD40/YVTN_repeat-like_dom_sf; WD_REPEATS_1; WD_REPEATS_2; WD_REPEATS_REGION	protein binding	GO:0005515
TE_homo_17183	4.01733	8.20638e-06	Fvb2:3827665-3827933	Fvb2	3825513	3826999	FvH4_2g04887	-	666	Upstream TSS	NA	NA	hypothetical protein RchiOBHm_Chr6g0254681 [Rosa chinensis]; tr|A0A2P6PLM7|A0A2P6PLM7_ROSCH Uncharacterized protein OS=Rosa chinensis OX=74649 GN=RchiOBHm_Chr6g0254681 PE=4 SV=1	disorder_prediction; FAMILY NOT NAMED; F-box; F-box_dom; F-box domain; F-box-like_dom_sf; FvH4_2g04887.t1_v4.0.a2; protein binding;	protein binding	GO:0005515
TE_homo_35150	4.03579	0.00909099	Fvb3:7635814-7636243	Fvb3	7632094	7632919	FvH4_3g12742	+	2895	Downstream TTS	-0.516375	0.925979	AT2G34930.1 | disease resistance family protein / LRR family protein | Chr2:14737169-14739886 REVERSE LENGTH=905 | 201606; PREDICTED: LRR receptor-like serine/threonine-protein kinase GSO1 [Fragaria vesca subsp. vesca]; sp|Q6JN46|EIX2_SOLLC Receptor-like protein EIX2 OS=Solanum lycopersicum OX=4081 GN=EIX2 PE=1 SV=2; tr|A0A2P6Q7P2|A0A2P6Q7P2_ROSCH Putative non-specific serine/threonine protein ki…	disorder_prediction; FAMILY NOT NAMED; FvH4_3g12742.t1_v4.0.a2; L domain-like; Leu-rich_rpt; LEURICHRPT; LRR; LRR_1; LRR_8; LRR_dom_sf; protein binding;	protein binding	GO:0005515
TE_homo_99501	4.03919	1.75089e-10	Fvb6:2208894-2209233	Fvb6	2207468	2207864	FvH4_6g04060	+	1030	Downstream TTS	NA	NA	PREDICTED: TMV resistance protein N-like isoform X2 [Fragaria vesca subsp. vesca]; tr|A0A2P6RE29|A0A2P6RE29_ROSCH Uncharacterized protein OS=Rosa chinensis OX=74649 GN=RchiOBHm_Chr3g0481891 PE=4 SV=1	FvH4_6g04060.t1_v4.0.a2	NA	NA
TE_homo_87596	4.08458	0.000218448	Fvb5:13432932-13433352	Fvb5	13431127	13431706	FvH4_5g22090	-	1226	Upstream TSS	6.45979	0.000432149	AT5G46770.1 | hypothetical protein | Chr5:18977494-18977895 FORWARD LENGTH=133 | 201606; PREDICTED: uncharacterized protein LOC105351901 [Fragaria vesca subsp. vesca]; tr|A0A2P6PA08|A0A2P6PA08_ROSCH Uncharacterized protein OS=Rosa chinensis OX=74649 GN=RchiOBHm_Chr7g0209741 PE=4 SV=1	FAMILY NOT NAMED; FvH4_5g22090.t1_v4.0.a2	NA	NA
TE_homo_71216	4.16529	0.0125455	Fvb4:16084331-16084745	Fvb4	16079220	16083617	FvH4_4g12372	-	714	Upstream TSS	NA	NA	NA	FvH4_4g12372.t1_v4.0.a2	NA	NA
TE_homo_71216	4.16529	0.0125455	Fvb4:16084331-16084745	Fvb4	16087258	16098476	FvH4_4g12380	+	2514	Upstream TSS	0.598795	0.174515	AT3G52140.1 | tetratricopeptide repeat (TPR)-containing protein | Chr3:19333232-19341295 FORWARD LENGTH=1403 | 201606; PREDICTED: clustered mitochondria protein [Fragaria vesca subsp. vesca]; sp|F4J5S1|CLU_ARATH Clustered mitochondria protein OS=Arabidopsis thaliana OX=3702 GN=FMT PE=2 SV=1; tr|A0A2P6QVF7|A0A2P6QVF7_ROSCH Clustered mitochondria protein homolog OS=Rosa chinensis OX=74649 GN=RchiOB…	CLU; CLU-central; CLU_dom; CLU_N; CLUSTERED MITOCHONDRIA PROTEIN HOMOLOG; disorder_prediction; DUF727; eIF3_p135; EUKARYOTIC TRANSLATION INITIATION FACTOR 3 SUBUNIT EIF-3; FvH4_4g12380.t1_v4.0.a2; GSKIP_dom; GSKIP_dom_sf; Hypothetical protein c14orf129, hspc210; intracellular distribution of mitochondria; protein binding; TPR; TPR_12; TPR-contain_dom; TPR-like; TPR-like_helical_dom_sf; TPR_REGION…	intracellular distribution of mitochondria; protein binding	GO:0005515; GO:0048312
TE_homo_112437	4.16736	0.0264485	Fvb6:21474299-21474728	Fvb6	21468362	21472179	FvH4_6g27900	-	2120	Upstream TSS	-0.015877	0.988377	AT5G45710.3 | winged-helix DNA-binding transcription factor family protein | Chr5:18541576-18542706 FORWARD LENGTH=345 | 201606; PREDICTED: heat stress transcription factor A-4c-like [Fragaria vesca subsp. vesca]; sp|Q94J16|HFA4B_ORYSJ Heat stress transcription factor A-4b OS=Oryza sativa subsp. japonica OX=39947 GN=HSFA4B PE=2 SV=1; tr|A0A1W6LWG1|A0A1W6LWG1_FRAAN Heat shock transcription factor …	Coil; disorder_prediction; DNA-binding transcription factor activity; FvH4_6g27900.t1_v4.0.a2; HEAT SHOCK TRANSCRIPTION FACTOR; HSF_DNA-bd; HSF_DNA-bind; HSF_DOMAIN; HSFDOMAIN; HSF_fam; nucleus; &quot;Winged helix&quot; DNA-binding domain; regulation of transcription, DNA-templated; sequence-specific DNA binding; ; WH_DNA-bd_sf; WH-like_DNA-bd_sf	DNA-binding transcription factor activity; nucleus; regulation of DNA-templated transcription; sequence-specific DNA binding	GO:0003700; GO:0005634; GO:0006355; GO:0043565
TE_homo_118322	4.19544	0.000616929	Fvb6:30268725-30268992	Fvb6	30259641	30266558	FvH4_6g38250	+	2167	Downstream TTS	0.285943	0.407837	AT1G29400.3 | MEI2-like protein 5 | Chr1:10290393-10293696 REVERSE LENGTH=800 | 201606; PREDICTED: protein MEI2-like 2 [Fragaria vesca subsp. vesca]; sp|Q6ZI17|OML2_ORYSJ Protein MEI2-like 2 OS=Oryza sativa subsp. japonica OX=39947 GN=ML2 PE=2 SV=1; tr|A0A2P6S071|A0A2P6S071_ROSCH Putative RNA recognition motif 2, nucleotide-binding alpha-beta plait domain-containing protein OS=Rosa chinensis OX=7…	disorder_prediction; FvH4_6g38250.t1_v4.0.a2; MEI2-like_RRM1; MEI2-like_RRM3; Mei2-like_Rrm_C; nucleic acid binding; Nucleotide-bd_a/b_plait_sf; PROTEIN MEI2-LIKE 3; RBD_domain_sf; RNA-binding domain, RBD; RRM; RRM_1; RRM1_MEI2_like; RRM_2; RRM2_MEI2_like; RRM3_MEI2_like; RRM_dom; SERINE/ARGININE RICH SPLICING FACTOR	nucleic acid binding	GO:0003676
TE_homo_23271	4.19587	0.0167877	Fvb2:12072330-12072651	Fvb2	12075147	12079950	FvH4_2g13841	+	2497	Upstream TSS	NA	NA	NA	disorder_prediction; FvH4_2g13841.t1_v4.0.a2	NA	NA
TE_homo_23271	4.19587	0.0167877	Fvb2:12072330-12072651	Fvb2	12068189	12070769	FvH4_2g13840	+	1561	Downstream TTS	-13.4691	8.24985e-21	AT1G76890.2 | Duplicated homeodomain-like superfamily protein | Chr1:28873211-28875203 REVERSE LENGTH=575 | 201606; PREDICTED: trihelix transcription factor GT-2-like [Fragaria vesca subsp. vesca]; sp|Q39117|TGT2_ARATH Trihelix transcription factor GT-2 OS=Arabidopsis thaliana OX=3702 GN=GT-2 PE=2 SV=1; tr|A0A2H4NFW4|A0A2H4NFW4_FRAAN Trihelix transcription factor GT-2A OS=Fragaria ananassa OX=374…	disorder_prediction; FAMILY NOT NAMED; FvH4_2g13840.t1_v4.0.a2; GT1; Myb_DNA-bind_4; MYB_LIKE; Myb-like_dom; TRIHELIX TRANSCRIPTION FACTOR GT-2	NA	NA
TE_homo_80357	4.20219	0.00209737	Fvb4:31066824-31067210	Fvb4	31069365	31069737	FvH4_4g32420	+	2156	Upstream TSS	0.910891	0.0487515	PREDICTED: wiskott-Aldrich syndrome protein family member 2-like [Malus domestica]; tr|A0A2P6R3A4|A0A2P6R3A4_ROSCH Uncharacterized protein OS=Rosa chinensis OX=74649 GN=RchiOBHm_Chr4g0441281 PE=4 SV=1	disorder_prediction; FAMILY NOT NAMED; FvH4_4g32420.t1_v4.0.a2; HYDROXYPROLINE-RICH GLYCOPROTEIN FAMILY PROTEIN	NA	NA
TE_homo_80357	4.20219	0.00209737	Fvb4:31066824-31067210	Fvb4	31063616	31064537	FvH4_4g32400	+	2287	Downstream TTS	2.06939	0.00730125	AT1G70990.1 | proline-rich family protein | Chr1:26767520-26768050 REVERSE LENGTH=176 | 201606; PREDICTED: protein trichome birefringence-like 32 [Fragaria vesca subsp. vesca]; tr|A0A2P6R3B7|A0A2P6R3B7_ROSCH Uncharacterized protein OS=Rosa chinensis OX=74649 GN=RchiOBHm_Chr4g0441241 PE=4 SV=1	disorder_prediction; FAMILY NOT NAMED; FvH4_4g32400.t1_v4.0.a2;	NA	NA
TE_struc_1625	4.25398	0.0129891	Fvb4:14637136-14637530	Fvb4	14638712	14656957	FvH4_4g10960	+	1183	Upstream TSS	0.358579	0.175171	AT2G43400.1 | electron-transfer flavoprotein:ubiquinone oxidoreductase | Chr2:18021304-18025041 FORWARD LENGTH=633 | 201606; PREDICTED: electron transfer flavoprotein-ubiquinone oxidoreductase, mitochondrial isoform X3 [Fragaria vesca subsp. vesca]; sp|O22854|ETFQO_ARATH Electron transfer flavoprotein-ubiquinone oxidoreductase, mitochondrial OS=Arabidopsis thaliana OX=3702 GN=ETFQO PE=2 SV=1; tr|…	4Fe-4S ferredoxins; ELECTRON TRANSFER FLAVOPROTEIN-UBIQUINONE OXIDOREDUCTASE; ELECTRON TRANSFER FLAVOPROTEIN-UBIQUINONE OXIDOREDUCTASE, MITOCHONDRIAL; electron-transferring-flavoprotein dehydrogenase activity; electron transport chain; ETF-QO; ETF_QO; FAD-linked reductases, C-terminal domain; FAD/NAD-bd_sf; FAD/NAD(P)-binding domain; FvH4_4g10960.t1_v4.0.a2; NAD_binding_8; Respiratory electron tr…	electron-transferring-flavoprotein dehydrogenase activity; electron transport chain	GO:0004174; GO:0022900
TE_homo_112705	4.40072	0.0109238	Fvb6:21808578-21808944	Fvb6	21802960	21806146	FvH4_6g28330	+	2432	Downstream TTS	NA	NA	AT3G06240.1 | F-box family protein | Chr3:1887336-1888619 FORWARD LENGTH=427 | 201606; PREDICTED: F-box/kelch-repeat protein At3g06240-like [Fragaria vesca subsp. vesca] &gt;gi|764605739|ref|XP_011467007.1| PREDICTED: F-box/kelch-repeat protein At3g06240-like [Fragaria vesca subsp. vesca]; sp|Q8GXC7|FBK50_ARATH F-box/kelch-repeat protein At3g06240 OS=Arabidopsis thaliana OX=3702 GN=At3g06240 PE=2…	FAMILY NOT NAMED; FBA_1; F-box; FBOX; F-box-assoc_dom_typ1; F-box-assoc_interact_dom; F-box_dom; F-box domain; F-box-like_dom_sf; FvH4_6g28330.t1_v4.0.a2; Galactose oxidase, central domain; Gal_Oxase/kelch_b-propeller; protein binding; ; TIGR01640	protein binding	GO:0005515
TE_homo_121050	4.41693	0.000535393	Fvb6:35684258-35684623	Fvb6	35675703	35681417	FvH4_6g46910	-	2841	Upstream TSS	-1.89403	0.00149259	AT3G29390.1 | RS2-interacting KH protein | Chr3:11289675-11294524 FORWARD LENGTH=578 | 201606; PREDICTED: protein RIK [Fragaria vesca subsp. vesca]; sp|Q9LIA4|RIK_ARATH Protein RIK OS=Arabidopsis thaliana OX=3702 GN=RIK PE=1 SV=2; tr|A0A2P6S3X8|A0A2P6S3X8_ROSCH Putative KH domain containing protein OS=Rosa chinensis OX=74649 GN=RchiOBHm_Chr2g0165881 PE=4 SV=1	BLOM7; disorder_prediction; Eukaryotic type KH-domain (KH-domain type I); FvH4_6g46910.t1_v4.0.a2; KH_dom_type_1_sf; KH HOMOLOGY DOMAIN-CONTAINING PROTEIN 4; nucleus; RIK/BLOM7; RNA binding	nucleus; RNA binding	GO:0003723; GO:0005634
TE_homo_121050	4.41693	0.000535393	Fvb6:35684258-35684623	Fvb6	35681609	35682125	FvH4_6g46911	-	2133	Upstream TSS	NA	NA	AT1G13900.1 | Purple acid phosphatases superfamily protein | Chr1:4753494-4755554 REVERSE LENGTH=656 | 201606; PREDICTED: probable inactive purple acid phosphatase 2 [Fragaria vesca subsp. vesca]; sp|Q9LMG7|PPA2_ARATH Probable inactive purple acid phosphatase 2 OS=Arabidopsis thaliana OX=3702 GN=PAP2 PE=2 SV=1; tr|A0A2P6R2M8|A0A2P6R2M8_ROSCH Purple acid phosphatase OS=Rosa chinensis OX=74649 GN=R…	FAMILY NOT NAMED; FvH4_6g46911.t1_v4.0.a2; INACTIVE PURPLE ACID PHOSPHATASE 9-RELATED	NA	NA
TE_homo_34968	4.42511	0.000617838	Fvb3:7147058-7147477	Fvb3	7143547	7146568	FvH4_3g12050	-	490	Upstream TSS	0.386202	0.165177	AT1G04760.2 | vesicle-associated membrane protein 726 | Chr1:1334760-1336070 FORWARD LENGTH=220 | 201606; PREDICTED: putative vesicle-associated membrane protein 726 [Fragaria vesca subsp. vesca]; sp|Q9MAS5|VA726_ARATH Putative vesicle-associated membrane protein 726 OS=Arabidopsis thaliana OX=3702 GN=VAMP726 PE=2 SV=2; tr|A0A2P6Q744|A0A2P6Q744_ROSCH Putative Longin-like domain-containing protein…	COPII-mediated vesicle transport; FvH4_3g12050.t1_v4.0.a2; integral component of membrane; Longin; LONGIN; Longin_dom; Longin-like_dom_sf; R-SNARE; ; SNARE fusion complex; SNARE-like; SNARE PROTEINS; Synaptobrevin; SYNAPTOBREVIN; SYNAPTOBREVN; vesicle-mediated transport; V_SNARE	integral to membrane; vesicle-mediated transport	GO:0016021; GO:0016192
TE_homo_34968	4.42511	0.000617838	Fvb3:7147058-7147477	Fvb3	7148725	7152513	FvH4_3g12060	-	1249	Downstream TTS	0.288751	0.292559	AT5G44785.2 | organellar single-stranded DNA binding protein 3 | Chr5:18070877-18073010 REVERSE LENGTH=442 | 201606; PREDICTED: protein OSB3, chloroplastic/mitochondrial-like isoform X2 [Fragaria vesca subsp. vesca]; sp|Q8GWJ4|OSB3_ARATH Protein OSB3, chloroplastic/mitochondrial OS=Arabidopsis thaliana OX=3702 GN=OSB3 PE=2 SV=1; tr|A0A2P6Q745|A0A2P6Q745_ROSCH Putative primosome PriB/single-strand…	disorder_prediction; DNA replication; FvH4_3g12060.t1_v4.0.a2; NA-bd_OB-fold; Nucleic acid-binding proteins; Primosome_PriB/ssb; PROTEIN OSB2, CHLOROPLASTIC; single-stranded DNA binding; SINGLE-STRANDED DNA-BINDING PROTEIN; SSB; ssDNA-bd; Transcriptional activation of mitochondrial biogenesis	DNA replication; single-stranded DNA binding	GO:0003697; GO:0006260
TE_homo_102311	4.45544	0.0225235	Fvb6:7721944-7722203	Fvb6	7724024	7724476	FvH4_6g12751	-	1822	Downstream TTS	-2.0691	0.391962	tr|A0A2P6S2X8|A0A2P6S2X8_ROSCH Uncharacterized protein OS=Rosa chinensis OX=74649 GN=RchiOBHm_Chr2g0161781 PE=4 SV=1; uncharacterized protein LOC112185061 [Rosa chinensis] &gt;gi|1358178536|gb|PRQ53011.1| hypothetical protein RchiOBHm_Chr2g0161781 [Rosa chinensis]	FvH4_6g12751.t1_v4.0.a2	NA	NA
TE_homo_23472	4.65035	0.0303711	Fvb2:12247710-12247859	Fvb2	12238779	12246567	FvH4_2g13940	+	1143	Downstream TTS	0.0615431	0.944684	AT1G76810.1 | eukaryotic translation initiation factor 2 (eIF-2) family protein | Chr1:28831366-28836310 REVERSE LENGTH=1294 | 201606; PREDICTED: eukaryotic translation initiation factor 5B [Fragaria vesca subsp. vesca]; sp|Q10251|IF2P_SCHPO Eukaryotic translation initiation factor 5B OS=Schizosaccharomyces pombe (strain 972 / ATCC 24843) OX=284812 GN=SPAC56F8.03 PE=1 SV=1; tr|A0A2P6PS30|A0A2P6PS…	aeIF5B_II; Coil; disorder_prediction; EFTu-like_2; ELONGATNFCT; FAMILY NOT NAMED; FvH4_2g13940.t1_v4.0.a2; FvH4_2g13940.t2_v4.0.a2; GTPase activity; GTP binding; GTP_EFTU; GTP_EFTU_D2; G_TR_2; IF-2; IF2_aeIF5B_IV; IF2_eIF5B; Initiation factor IF2/eIF5b, domain 3; P-loop containing nucleoside triphosphate hydrolases; P-loop_NTPase; ; Small_GTP-bd_dom; TF_GTP-bd_dom; TIF_IF2; TIF_IF2_dom3; TIF_IF2_…	GTPase activity; GTP binding	GO:0003924; GO:0005525
TE_homo_53320	4.65875	0.0402603	Fvb3:30770089-30770418	Fvb3	30771924	30774857	FvH4_3g35860	+	1507	Upstream TSS	NA	NA	AT5G17680.2 | disease resistance protein (TIR-NBS-LRR class) | Chr5:5822999-5827153 FORWARD LENGTH=1295 | 201606; PREDICTED: TMV resistance protein N-like [Fragaria vesca subsp. vesca]; sp|Q40392|TMVRN_NICGU TMV resistance protein N OS=Nicotiana glutinosa OX=35889 GN=N PE=1 SV=1; tr|A0A2P6QMJ8|A0A2P6QMJ8_ROSCH Putative toll-like receptor, P-loop containing nucleoside triphosphate hydrolase OS=Ros…	carbohydrate binding; FAMILY NOT NAMED; FvH4_3g35860.t1_v4.0.a2; Jacalin; JACALIN_LECTIN; Jacalin-like_lectin_dom; Jacalin-like_lectin_dom_plant; Jacalin-like_lectin_dom_sf; Mannose-binding lectins; protein binding; signal transduction; ; TIR; TIR_dom; Toll/Interleukin receptor TIR domain; Toll_tir_struct_dom_sf	carbohydrate binding; protein binding; signal transduction	GO:0005515; GO:0007165; GO:0030246
TE_homo_70925	4.69784	0.0125455	Fvb4:15527004-15527252	Fvb4	15528633	15529488	FvH4_4g11800	+	1382	Upstream TSS	NA	NA	NA	FvH4_4g11800.t1_v4.0.a2	NA	NA
TE_homo_70925	4.69784	0.0125455	Fvb4:15527004-15527252	Fvb4	15527504	15528400	FvH4_4g11790	-	253	Downstream TTS	NA	NA	AT1G78360.1 | glutathione S-transferase TAU 21 | Chr1:29482070-29482966 REVERSE LENGTH=220 | 201606; probable glutathione S-transferase parA [Prunus persica]; sp|P25317|GSTXA_TOBAC Probable glutathione S-transferase parA OS=Nicotiana tabacum OX=4097 GN=PARA PE=2 SV=1; tr|M5XNN8|M5XNN8_PRUPE Uncharacterized protein OS=Prunus persica OX=3760 GN=PRUPE_ppa022301mg PE=3 SV=1	FvH4_4g11790.t1_v4.0.a2; GLUTATHIONE S-TRANSFERASE, GST, SUPERFAMILY, GST DOMAIN CONTAINING; Glutathione-S-Trfase_C-like; Glutathione-S-Trfase_C_sf; Glutathione_S-Trfase_N; GST_C_2; GST_C_Tau; GST_CTER; GST C-terminal domain-like; GST_N; GST_N_Tau; GST_NTER; protein binding; ; Thioredoxin-like; Thioredoxin-like_sf	protein binding	GO:0005515
TE_homo_52674	4.73301	0.00584192	Fvb3:29727483-29727749	Fvb3	29729955	29733169	FvH4_3g34260	-	2207	Downstream TTS	NA	NA	AT5G41460.1 | transferring glycosyl group transferase (DUF604) | Chr5:16589724-16592197 REVERSE LENGTH=524 | 201606; PREDICTED: uncharacterized protein LOC101307385 [Fragaria vesca subsp. vesca]; tr|A0A2P6QI03|A0A2P6QI03_ROSCH Putative N-acetylgalactosaminide beta-1,3-galactosyltransferase OS=Rosa chinensis OX=74649 GN=RchiOBHm_Chr5g0061811 PE=4 SV=1	DUF604; FRINGE-RELATED; FvH4_3g34260.t1_v4.0.a2; GLYCOSYLTRANSFERASE	NA	NA
TE_homo_98662	4.87155	0.0291026	Fvb6:1719-1872	Fvb6	3677	14550	FvH4_6g00010	-	1806	Downstream TTS	0.0326004	0.938108	AT5G16270.1 | sister chromatid cohesion 1 protein 4 | Chr5:5316783-5322330 FORWARD LENGTH=1031 | 201606; PREDICTED: sister chromatid cohesion 1 protein 4 isoform X3 [Fragaria vesca subsp. vesca]; sp|Q8W1Y0|SSC14_ARATH Sister chromatid cohesion 1 protein 4 OS=Arabidopsis thaliana OX=3702 GN=SYN4 PE=2 SV=1; tr|A0A251P141|A0A251P141_PRUPE Uncharacterized protein OS=Prunus persica OX=3760 GN=PRUPE_6G…	cohesin complex; disorder_prediction; FvH4_6g00010.t1_v4.0.a2; Meiotic synapsis; protein binding; &quot;Winged helix&quot; DNA-binding domain; Rad21_Rec8; Rad21/Rec8_C_eu; Rad21/Rec8-like; Rad21_Rec8_N; SCC1 / RAD21 FAMILY MEMBER; ScpA-like_C; sister chromatid cohesion; SISTER CHROMATID COHESION 1 PROTEIN 4; WH_DNA-bd_sf	cohesin complex; protein binding; sister chromatid cohesion	GO:0005515; GO:0007062; GO:0008278
TE_homo_21252	4.87973	0.000160019	Fvb2:9318508-9318727	Fvb2	9318842	9322851	FvH4_2g10510	+	116	Upstream TSS	1.3965	3.14249e-07	AT3G21060.1 | Transducin/WD40 repeat-like superfamily protein | Chr3:7377822-7379942 FORWARD LENGTH=547 | 201606; PREDICTED: protein RBL [Fragaria vesca subsp. vesca] &gt;gi|764530567|ref|XP_011458299.1| PREDICTED: protein RBL [Fragaria vesca subsp. vesca]; sp|Q5E915|RBBP_ARATH Protein RBL OS=Arabidopsis thaliana OX=3702 GN=RBL PE=1 SV=1; tr|A0A2P6PQ30|A0A2P6PQ30_ROSCH Putative transcription fact…	Activation of anterior HOX genes in hindbrain development during early embryogenesis; Deactivation of the beta-catenin transactivating complex; disorder_prediction; FAMILY NOT NAMED; Formation of the beta-catenin:TCF transactivating complex; FvH4_2g10510.t1_v4.0.a2; FvH4_2g10510.t2_v4.0.a2; FvH4_2g10510.t3_v4.0.a2; FvH4_2g10510.t4_v4.0.a2; Neddylation; PKMTs methylate histone lysines; protein bin…	protein binding; Set1C/COMPASS complex	GO:0005515; GO:0048188
TE_homo_21252	4.87973	0.000160019	Fvb2:9318508-9318727	Fvb2	9313164	9317496	FvH4_2g10501	+	1012	Downstream TTS	NA	NA	NA	disorder_prediction; FvH4_2g10501.t1_v4.0.a2	NA	NA
TE_homo_20685	4.96383	1.06164e-08	Fvb2:8485776-8486190	Fvb2	8487156	8491480	FvH4_2g09560	+	967	Upstream TSS	0.862135	0.0303721	AT4G39150.3 | DNAJ heat shock N-terminal domain-containing protein | Chr4:18233651-18235740 REVERSE LENGTH=345 | 201606; PREDICTED: chaperone protein dnaJ 10-like [Fragaria vesca subsp. vesca] &gt;gi|764523384|ref|XP_011457713.1| PREDICTED: chaperone protein dnaJ 10-like [Fragaria vesca subsp. vesca]; sp|Q8GYX8|DNJ10_ARATH Chaperone protein dnaJ 10 OS=Arabidopsis thaliana OX=3702 GN=ATJ10 PE=2 SV…	Chaperone J-domain; DnaJ; DNAJ_1; DNAJ_2; DnaJ_domain; DnaJ_domain_CS; DnaJ-X; DnaJ_X; FAMILY NOT NAMED; FvH4_2g09560.t1_v4.0.a2; FvH4_2g09560.t2_v4.0.a2; FvH4_2g09560.t3_v4.0.a2; JDOMAIN; J_dom_sf;	NA	NA
TE_homo_20685	4.96383	1.06164e-08	Fvb2:8485776-8486190	Fvb2	8480654	8485268	FvH4_2g09550	+	508	Downstream TTS	NA	NA	AT4G39150.3 | DNAJ heat shock N-terminal domain-containing protein | Chr4:18233651-18235740 REVERSE LENGTH=345 | 201606; PREDICTED: chaperone protein dnaJ 10-like isoform X1 [Fragaria vesca subsp. vesca] &gt;gi|764523370|ref|XP_011457710.1| PREDICTED: chaperone protein dnaJ 10-like isoform X1 [Fragaria vesca subsp. vesca]; sp|Q8GYX8|DNJ10_ARATH Chaperone protein dnaJ 10 OS=Arabidopsis thaliana OX…	Chaperone J-domain; DnaJ; DNAJ_1; DNAJ_2; DnaJ_domain; DnaJ_domain_CS; DnaJ-X; DnaJ_X; FAMILY NOT NAMED; FvH4_2g09550.t1_v4.0.a2; JDOMAIN; J_dom_sf;	NA	NA
TE_struc_3017	4.96863	5.36972e-07	Fvb6:38725460-38725754	Fvb6	38726892	38727816	FvH4_6g52703	-	1139	Downstream TTS	NA	NA	putative F-box domain-containing protein [Rosa chinensis]; tr|A0A2P6SMV0|A0A2P6SMV0_ROSCH Putative F-box domain-containing protein OS=Rosa chinensis OX=74649 GN=RchiOBHm_Chr1g0376381 PE=4 SV=1	FAMILY NOT NAMED; F-box; F-box_dom; F-box domain; F-box-like_dom_sf; FvH4_6g52703.t1_v4.0.a2; protein binding;	protein binding	GO:0005515
TE_struc_3017	4.96863	5.36972e-07	Fvb6:38725460-38725754	Fvb6	38728406	38731721	FvH4_6g52710	-	2653	Downstream TTS	1.15676	1.07998e-06	AT3G26000.1 | Ribonuclease inhibitor | Chr3:9507042-9508542 REVERSE LENGTH=453 | 201606; PREDICTED: F-box protein SKIP14-like isoform X1 [Fragaria vesca subsp. vesca] &gt;gi|764612856|ref|XP_011467728.1| PREDICTED: F-box protein SKIP14-like isoform X1 [Fragaria vesca subsp. vesca] &gt;gi|764612861|ref|XP_011467729.1| PREDICTED: F-box protein SKIP14-like isoform X1 [Fragaria vesca subsp. vesca]; s…	F-box_dom; F-box domain; F-box-like; F-box-like_dom_sf; FvH4_6g52710.t1_v4.0.a2; FvH4_6g52710.t2_v4.0.a2; LRR_dom_sf; MITOCHONDRIAL ATP SYNTHASE COUPLING FACTOR B; protein binding; RNI-like;	protein binding	GO:0005515
TE_homo_128341	5.00736	0.0014474	Fvb7:9550723-9550815	Fvb7	9552219	9553071	FvH4_7g10112	-	1405	Downstream TTS	NA	NA	AT3G11010.6 | receptor like protein 34 | Chr3:3450988-3453672 REVERSE LENGTH=861 | 201606; PREDICTED: receptor-like protein 12 [Fragaria vesca subsp. vesca]; sp|Q9SRL2|RLP34_ARATH Receptor-like protein 34 OS=Arabidopsis thaliana OX=3702 GN=RLP34 PE=2 SV=1; tr|A0A2P6SDE3|A0A2P6SDE3_ROSCH Putative leucine-rich repeat-containing, plant-type, leucine-rich repeat domain, L OS=Rosa chinensis OX=74649 G…	disorder_prediction; FAMILY NOT NAMED; FvH4_7g10112.t1_v4.0.a2; L domain-like; Leu-rich_rpt; LRR_1; protein binding;	protein binding	GO:0005515
TE_homo_128341	5.00736	0.0014474	Fvb7:9550723-9550815	Fvb7	9553160	9553959	FvH4_7g10113	-	2346	Downstream TTS	NA	NA	AT2G33060.1 | receptor like protein 27 | Chr2:14025661-14028087 FORWARD LENGTH=808 | 201606; receptor like protein 7-like [Rosa chinensis] &gt;gi|1358182237|gb|PRQ56711.1| putative leucine-rich repeat-containing, plant-type, leucine-rich repeat domain, L [Rosa chinensis]; sp|F4IUU1|RLP27_ARATH Receptor like protein 27 OS=Arabidopsis thaliana OX=3702 GN=RLP27 PE=2 SV=1; tr|A0A2P6SDE3|A0A2P6SDE3_RO…	FAMILY NOT NAMED; FvH4_7g10113.t1_v4.0.a2; L domain-like; Leu-rich_rpt; LEURICHRPT; LRR_1; LRR_8; LRR_dom_sf; protein binding; RECEPTOR LIKE PROTEIN 46	protein binding	GO:0005515
TE_struc_205	5.10247	1.70395e-05	Fvb1:14390268-14390976	Fvb1	14389158	14389831	FvH4_1g22462	-	437	Upstream TSS	NA	NA	AT5G40480.1 | embryo defective 3012 | Chr5:16213361-16223982 FORWARD LENGTH=1923 | 201606; PREDICTED: nuclear pore complex protein GP210-like [Fragaria vesca subsp. vesca]; sp|F4KHD8|GP210_ARATH Nuclear pore complex protein GP210 OS=Arabidopsis thaliana OX=3702 GN=GB210 PE=1 SV=1; tr|A0A2P6S5T7|A0A2P6S5T7_ROSCH Putative invasin/intimin cell-adhesion OS=Rosa chinensis OX=74649 GN=RchiOBHm_Chr2g017…	FvH4_1g22462.t1_v4.0.a2; NUCLEAR PORE MEMBRANE GLYCOPROTEIN GP210-RELATED	NA	NA
TE_homo_3280	5.12894	9.7943e-09	Fvb1:8374753-8375166	Fvb1	8370251	8372309	FvH4_1g14930	+	2444	Downstream TTS	-2.7023	0.452593	AT3G50440.1 | methylesterase | Chr3:18717392-18718396 REVERSE LENGTH=275 | 201606; PREDICTED: probable esterase PIR7A [Fragaria vesca subsp. vesca]; sp|Q6RYA0|SABP2_TOBAC Salicylic acid-binding protein 2 OS=Nicotiana tabacum OX=4097 GN=SABP2 PE=1 SV=1; tr|A0A2P6SB71|A0A2P6SB71_ROSCH Putative 3-oxolaurate decarboxylase OS=Rosa chinensis OX=74649 GN=RchiOBHm_Chr1g0329911 PE=4 SV=1	AB_hydrolase; AB_hydrolase_1; Abhydrolase_6; ALPHA/BETA HYDROLASE FOLD-CONTAINING PROTEIN; alpha/beta-Hydrolases; FvH4_1g14930.t1_v4.0.a2;	NA	NA
TE_homo_99891	5.14867	0.017592	Fvb6:3081145-3081486	Fvb6	3083456	3085000	FvH4_6g05450	+	1971	Upstream TSS	1.84468	1.01375e-07	AT3G05200.1 | RING/U-box superfamily protein | Chr3:1477377-1478573 FORWARD LENGTH=398 | 201606; PREDICTED: E3 ubiquitin-protein ligase ATL6 [Fragaria vesca subsp. vesca]; sp|Q8RXX9|ATL6_ARATH E3 ubiquitin-protein ligase ATL6 OS=Arabidopsis thaliana OX=3702 GN=ATL6 PE=1 SV=2; tr|A0A2P6R6Q4|A0A2P6R6Q4_ROSCH Putative transcription factor interactor and regulator LIM family OS=Rosa chinensis OX=7464…	disorder_prediction; FvH4_6g05450.t1_v4.0.a2; RING FINGER DOMAIN-CONTAINING; RING-H2_EL5_like; RING/U-box; ; zf-RING_2; ZF_RING_2; Znf_RING; Znf_RING/FYVE/PHD	NA	NA
TE_homo_131067	5.15344	0.00178814	Fvb7:14276133-14276386	Fvb7	14272811	14275166	FvH4_7g16710	-	967	Upstream TSS	NA	NA	AT1G01280.1 | cytochrome P450%2C family 703%2C subfamily A%2C polypeptide 2 | Chr1:112290-113905 FORWARD LENGTH=510 | 201606; PREDICTED: cytochrome P450 703A2 [Fragaria vesca subsp. vesca]; sp|Q7EZR4|C70A3_ORYSJ Cytochrome P450 703A2 OS=Oryza sativa subsp. japonica OX=39947 GN=CYP703A3 PE=1 SV=1; tr|A0A2P6SIK2|A0A2P6SIK2_ROSCH Putative cytochrome P450 OS=Rosa chinensis OX=74649 GN=RchiOBHm_Chr1g0…	Cytochrome P450; CYTOCHROME_P450; Cyt_P450; Cyt_P450_CS; Cyt_P450_E_grp-I; Cyt_P450_sf; EP450I; FAMILY NOT NAMED; FvH4_7g16710.t1_v4.0.a2; heme binding; iron ion binding; oxidation-reduction process; oxidoreductase activity, acting on paired donors, with incorporation or reduction of molecular oxygen; p450; P450	heme binding; iron ion binding; obsolete oxidation-reduction process; oxidoreductase activity, acting on paired donors, with incorporation or reduction of molecular oxygen	GO:0005506; GO:0016705; GO:0020037; GO:0055114
TE_homo_70195	5.16517	0.00356986	Fvb4:14491083-14491245	Fvb4	14486622	14488534	FvH4_4g10782	+	2549	Downstream TTS	NA	NA	AT2G34320.1 | Polynucleotidyl transferase%2C ribonuclease H-like superfamily protein | Chr2:14484959-14485837 FORWARD LENGTH=292 | 201606; tr|A0A2P6QCF0|A0A2P6QCF0_ROSCH Putative ribonuclease H-like domain-containing protein OS=Rosa chinensis OX=74649 GN=RchiOBHm_Chr5g0040041 PE=4 SV=1; uncharacterized protein LOC112177537 [Rosa chinensis]	FAMILY NOT NAMED; FvH4_4g10782.t1_v4.0.a2; nucleic acid binding; POLYNUCLEOTIDYL TRANSFERASE, RIBONUCLEASE H-LIKE SUPERFAMILY PROTEIN; Ribonuclease H-like; RNA-DNA hybrid ribonuclease activity; RNaseH_domain; RNase_H_like; RNaseH-like_sf; RNaseH_sf; RVT_3	nucleic acid binding; RNA-DNA hybrid ribonuclease activity	GO:0003676; GO:0004523
TE_homo_110054	5.18941	0.0235732	Fvb6:18512162-18512431	Fvb6	18513341	18514377	FvH4_6g24400	-	911	Downstream TTS	NA	NA	NA	disorder_prediction; FvH4_6g24400.t1_v4.0.a2	NA	NA
TE_homo_28895	5.19284	0.000409461	Fvb2:21335635-21335895	Fvb2	21332011	21333088	FvH4_2g26600	+	2547	Downstream TTS	NA	NA	AT4G11170.1 | Disease resistance protein (TIR-NBS-LRR class) family | Chr4:6811127-6817130 FORWARD LENGTH=1095 | 201606; PREDICTED: putative disease resistance protein At4g11170 [Fragaria vesca subsp. vesca]; sp|O82500|Y4117_ARATH Putative disease resistance protein At4g11170 OS=Arabidopsis thaliana OX=3702 GN=At4g11170 PE=2 SV=1; tr|A0A2P6PXC4|A0A2P6PXC4_ROSCH Putative TIR domain, winged helix-t…	Activation of caspases through apoptosome-mediated cleavage; ADP binding; DISEASERSIST; Formation of apoptosome; FvH4_2g26600.t1_v4.0.a2; LEUCINE-RICH REPEAT-CONTAINING PROTEIN; NB-ARC; Neutrophil degranulation; P-loop containing nucleoside triphosphate hydrolases; P-loop_NTPase; protein binding; Regulation of the apoptosome activity; signal transduction; ; SMAC (DIABLO) binds to IAPs; SMAC(DIABL…	ADP binding; protein binding; signal transduction	GO:0005515; GO:0007165; GO:0043531
TE_homo_8522	5.31175	6.99225e-33	Fvb1:16888715-16888988	Fvb1	16890451	16891268	FvH4_1g25072	+	1464	Upstream TSS	NA	NA	uncharacterized protein LOC112184339 [Rosa chinensis]	DUF4283; FvH4_1g25072.t1_v4.0.a2	NA	NA
TE_homo_50342	5.31439	0.0299249	Fvb3:26988736-26988983	Fvb3	26990596	26991863	FvH4_3g31921	+	1614	Upstream TSS	NA	NA	AT5G41220.3 | glutathione S-transferase THETA 3 | Chr5:16494560-16496525 REVERSE LENGTH=532 | 201606; PREDICTED: glutathione S-transferase T3-like [Fragaria vesca subsp. vesca]; sp|Q9FHE1|GSTT3_ARATH Glutathione S-transferase T3 OS=Arabidopsis thaliana OX=3702 GN=GSTT3 PE=2 SV=1; tr|A0A0A9S2P7|A0A0A9S2P7_ARUDO Uncharacterized protein OS=Arundo donax OX=35708 PE=4 SV=1	Coil; disorder_prediction; FAMILY NOT NAMED; FvH4_3g31921.t1_v4.0.a2; MYB_LIKE; Myb-like_dom; NAM-associated; NAM-associated_C	NA	NA
TE_homo_20965	5.72125	7.95718e-05	Fvb2:8880406-8880826	Fvb2	8876948	8877786	FvH4_2g10040	-	2620	Upstream TSS	-1.37023	0.0536728	AT4G34630.1 | prostatic spermine-binding-like protein | Chr4:16537093-16537692 REVERSE LENGTH=199 | 201606; hypothetical protein RchiOBHm_Chr6g0266971 [Rosa chinensis]; tr|A0A2P6PPT3|A0A2P6PPT3_ROSCH Uncharacterized protein OS=Rosa chinensis OX=74649 GN=RchiOBHm_Chr6g0266971 PE=4 SV=1	disorder_prediction; FvH4_2g10040.t1_v4.0.a2	NA	NA
TE_homo_20965	5.72125	7.95718e-05	Fvb2:8880406-8880826	Fvb2	8883182	8889748	FvH4_2g10050	-	2357	Downstream TTS	-4.53678	2.28371e-43	AT2G21385.1 | hypothetical protein | Chr2:9149726-9151752 FORWARD LENGTH=330 | 201606; PREDICTED: uncharacterized protein LOC101295094 [Fragaria vesca subsp. vesca]; tr|A0A2P6PPW9|A0A2P6PPW9_ROSCH Uncharacterized protein OS=Rosa chinensis OX=74649 GN=RchiOBHm_Chr6g0266981 PE=4 SV=1	FAMILY NOT NAMED; FvH4_2g10050.t1_v4.0.a2	NA	NA
TE_homo_29020	5.84824	0.0409039	Fvb2:21659568-21659819	Fvb2	21656541	21656978	FvH4_2g27220	-	2590	Upstream TSS	NA	NA	uncharacterized protein LOC112178113 [Rosa chinensis]	FvH4_2g27220.t1_v4.0.a2; nucleic acid binding; RNA-DNA hybrid ribonuclease activity; RNaseH_domain; RNase_H_like; RNaseH_sf; RVT_3	nucleic acid binding; RNA-DNA hybrid ribonuclease activity	GO:0003676; GO:0004523
TE_homo_16523	5.86298	0.0379866	Fvb2:2670128-2670253	Fvb2	2670563	2671133	FvH4_2g03372	+	311	Upstream TSS	NA	NA	NA	FvH4_2g03372.t1_v4.0.a2	NA	NA
TE_homo_122105	5.89005	0.00101114	Fvb6:38563061-38563735	Fvb6	38560109	38562707	FvH4_6g52310	-	354	Upstream TSS	-0.324779	0.578484	AT5G40660.1 | ATP12 protein-like protein | Chr5:16283650-16285161 REVERSE LENGTH=325 | 201606; PREDICTED: ATP synthase mitochondrial F1 complex assembly factor 2-like, partial [Fragaria vesca subsp. vesca]; sp|Q8N5M1|ATPF2_HUMAN ATP synthase mitochondrial F1 complex assembly factor 2 OS=Homo sapiens OX=9606 GN=ATPAF2 PE=1 SV=1; tr|A0A2P6S602|A0A2P6S602_ROSCH Putative ATP12, ATP synthase F1-assemb…	ATP12; ATP12_ATP_synth-F1-assembly; ATP12_ATP_synth-F1-assembly_N; ATP12-like; ATP12_ortho_dom_sf; ATP SYNTHASE MITOCHONDRIAL F1 COMPLEX ASSEMBLY FACTOR 2/ATP12 PROTEIN, MITOCHONDRIAL PRECURSOR; FvH4_6g52310.t1_v4.0.a2; proton-transporting ATP synthase complex assembly	proton-transporting ATP synthase complex assembly	GO:0043461
TE_homo_122105	5.89005	0.00101114	Fvb6:38563061-38563735	Fvb6	38563968	38566481	FvH4_6g52311	+	234	Upstream TSS	0.253235	0.574673	AT5G40670.1 | PQ-loop repeat family protein / transmembrane family protein | Chr5:16285968-16287591 FORWARD LENGTH=270 | 201606; PREDICTED: cystinosin homolog isoform X2 [Fragaria vesca subsp. vesca]; sp|P57758|CTNS_ARATH Cystinosin homolog OS=Arabidopsis thaliana OX=3702 GN=At5g40670 PE=2 SV=1; tr|A0A2P6S5Z9|A0A2P6S5Z9_ROSCH Putative lysosomal cystine transporter OS=Rosa chinensis OX=74649 GN=Rc…	CYSTINOSIN; FvH4_6g52311.t1_v4.0.a2; LC_transporter; Miscellaneous transport and binding events; PQ-loop; PQ-loop_rpt; ; Transport of inorganic cations/anions and amino acids/oligopeptides	NA	NA
TE_homo_65221	5.92339	6.85545e-07	Fvb4:9398489-9398912	Fvb4	9400099	9400759	FvH4_4g08761	-	1188	Downstream TTS	NA	NA	PREDICTED: uncharacterized protein LOC101300186 [Fragaria vesca subsp. vesca]; tr|A0A2P6RHB6|A0A2P6RHB6_ROSCH Uncharacterized protein OS=Rosa chinensis OX=74649 GN=RchiOBHm_Chr3g0495801 PE=4 SV=1	disorder_prediction; FAMILY NOT NAMED; FvH4_4g08761.t1_v4.0.a2;	NA	NA
TE_homo_73774	6.06135	0.000887352	Fvb4:19550152-19550577	Fvb4	19546821	19547855	FvH4_4g15662	-	2297	Upstream TSS	-3.79005	0.0287348	AT4G02550.5 | Myb/SANT-like DNA-binding domain protein | Chr4:1120622-1121629 REVERSE LENGTH=307 | 201606; PREDICTED: uncharacterized protein LOC105349374 [Fragaria vesca subsp. vesca]; tr|A0A2P6SB86|A0A2P6SB86_ROSCH Putative Myb/SANT-like domain-containing protein OS=Rosa chinensis OX=74649 GN=RchiOBHm_Chr1g0330381 PE=4 SV=1	disorder_prediction; FAMILY NOT NAMED; FvH4_4g15662.t1_v4.0.a2; Myb_DNA-bind_3; Myb/SANT-like_dom;	NA	NA
TE_homo_99452	6.14331	5.21482e-06	Fvb6:2100372-2100945	Fvb6	2098676	2100152	FvH4_6g03892	-	220	Upstream TSS	NA	NA	NA	FvH4_6g03892.t1_v4.0.a2	NA	NA
TE_homo_99452	6.14331	5.21482e-06	Fvb6:2100372-2100945	Fvb6	2101665	2102614	FvH4_6g03893	-	721	Downstream TTS	NA	NA	NA	FvH4_6g03893.t1_v4.0.a2	NA	NA
TE_struc_1943	6.16422	4.70804e-08	Fvb5:2354580-2355227	Fvb5	2357099	2358601	FvH4_5g03930	-	1873	Downstream TTS	1.93972	0.258169	AT3G20570.1 | early nodulin-like protein 9 | Chr3:7186754-7187453 REVERSE LENGTH=203 | 201606; PREDICTED: early nodulin-like protein 3 [Fragaria vesca subsp. vesca]; sp|Q9SK27|ENL1_ARATH Early nodulin-like protein 1 OS=Arabidopsis thaliana OX=3702 GN=At2g25060 PE=2 SV=2; tr|A0A2P6P6H1|A0A2P6P6H1_ROSCH Putative cupredoxin OS=Rosa chinensis OX=74649 GN=RchiOBHm_Chr7g0195571 PE=4 SV=1	Cu_bind_like; Cupredoxin; Cupredoxins; electron transfer activity; FAMILY NOT NAMED; FvH4_5g03930.t1_v4.0.a2; Phytocyanin; PHYTOCYANIN; Phytocyanin_dom;	electron transfer activity	GO:0009055
TE_homo_33302	6.25789	0.0211486	Fvb3:3750478-3750749	Fvb3	3751380	3760449	FvH4_3g06513	+	632	Upstream TSS	0.0540866	0.972688	AT1G17020.1 | senescence-related gene 1 | Chr1:5820258-5821741 FORWARD LENGTH=358 | 201606; PREDICTED: protein SRG1-like [Fragaria vesca subsp. vesca]; sp|Q39224|SRG1_ARATH Protein SRG1 OS=Arabidopsis thaliana OX=3702 GN=SRG1 PE=2 SV=1; tr|A0A2P6Q562|A0A2P6Q562_ROSCH Putative thebaine 6-O-demethylase OS=Rosa chinensis OX=74649 GN=RchiOBHm_Chr5g0012661 PE=3 SV=1	2OG-FeII_Oxy; Clavaminate synthase-like; FE2OG_OXY; FvH4_3g06513.t1_v4.0.a2; IPNS-like; oxidation-reduction process; OXIDOREDUCTASE, 2OG-FE II OXYGENASE FAMILY PROTEIN; oxidoreductase activity; Oxoglu/Fe-dep_dioxygenase;	obsolete oxidation-reduction process; oxidoreductase activity	GO:0016491; GO:0055114
TE_homo_71292	6.51582	0.00667739	Fvb4:16182015-16182375	Fvb4	16182580	16184287	FvH4_4g12502	+	206	Upstream TSS	NA	NA	ATMG00860.1 | DNA/RNA polymerases superfamily protein | ChrM:235916-236392 FORWARD LENGTH=158 | 201606; putative nucleotidyltransferase, Ribonuclease H [Rosa chinensis]; sp|Q99315|YG31B_YEAST Transposon Ty3-G Gag-Pol polyprotein OS=Saccharomyces cerevisiae (strain ATCC 204508 / S288c) OX=559292 GN=TY3B-G PE=1 SV=3; tr|A0A2P6RJJ0|A0A2P6RJJ0_ROSCH Putative nucleotidyltransferase, Ribonuclease H OS=…	DNA integration; DNA/RNA polymerases; FAMILY NOT NAMED; FvH4_4g12502.t1_v4.0.a2; INTEGRASE; Integrase_cat-core; Integrase_H2C2; nucleic acid binding; Ribonuclease H-like; RNase_HI_RT_Ty3; RNaseH-like_sf; RNaseH_sf; RT_dom; RT_LTR; RT_RNaseH_2; RVT_1;	DNA integration; nucleic acid binding	GO:0003676; GO:0015074
TE_homo_71292	6.51582	0.00667739	Fvb4:16182015-16182375	Fvb4	16184466	16185087	FvH4_4g12503	+	2092	Upstream TSS	NA	NA	putative nucleotidyltransferase, Ribonuclease H [Rosa chinensis]; sp|Q99315|YG31B_YEAST Transposon Ty3-G Gag-Pol polyprotein OS=Saccharomyces cerevisiae (strain ATCC 204508 / S288c) OX=559292 GN=TY3B-G PE=1 SV=3; tr|A0A2P6R7G4|A0A2P6R7G4_ROSCH Putative nucleotidyltransferase, Ribonuclease H OS=Rosa chinensis OX=74649 GN=RchiOBHm_Chr3g0457081 PE=4 SV=1	Chromo domain-like; Chromo-like_dom_sf; FAMILY NOT NAMED; FvH4_4g12503.t1_v4.0.a2;	NA	NA
TE_homo_38128	6.59971	0.016204	Fvb3:12443856-12444154	Fvb3	12436609	12441327	FvH4_3g19250	-	2529	Upstream TSS	-1.56363	0.00771245	AT3G15140.1 | Polynucleotidyl transferase%2C ribonuclease H-like superfamily protein | Chr3:5099712-5101717 REVERSE LENGTH=337 | 201606; PREDICTED: uncharacterized exonuclease domain-containing protein At3g15140 [Fragaria vesca subsp. vesca]; sp|Q8W566|Y3514_ARATH Uncharacterized exonuclease domain-containing protein At3g15140 OS=Arabidopsis thaliana OX=3702 GN=At3g15140 PE=2 SV=1; tr|A0A2P6QAE0|…	3'-5' EXONUCLEASE ERI1-RELATED; ERI-1_3'hExo_like; ERI1 EXORIBONUCLEASE 3; Exonuclease_RNaseT/DNA_pol3; FvH4_3g19250.t1_v4.0.a2; nucleic acid binding; Ribonuclease H-like; RNaseH-like_sf; RNaseH_sf; RNase_T	nucleic acid binding	GO:0003676
TE_homo_78825	6.87608	0.00374664	Fvb4:27435614-27435914	Fvb4	27437458	27446024	FvH4_4g25760	+	1545	Upstream TSS	-3.42933	1.01668e-08	AT1G72770.4 | HYPERSENSITIVE TO ABA1 | Chr1:27390998-27392851 FORWARD LENGTH=511 | 201606; PREDICTED: uncharacterized protein LOC101301302 isoform X1 [Fragaria vesca subsp. vesca]; sp|Q9CAJ0|P2C16_ARATH Protein phosphatase 2C 16 OS=Arabidopsis thaliana OX=3702 GN=HAB1 PE=1 SV=1; tr|A0A2P6R150|A0A2P6R150_ROSCH Putative leucine-rich repeat domain, L domain-containing protein OS=Rosa chinensis OX=74…	Adenine nucleotide alpha hydrolases-like; catalytic activity; cation binding; Coil; disorder_prediction; FvH4_4g25760.t1_v4.0.a2; L domain-like; LRR_dom_sf; PP2C; PP2C_BS; PP2Cc; PP2C-like; PPM_1; PPM_2; PPM-type_dom_sf; PPM-type_phosphatase_dom; protein dephosphorylation; PROTEIN PHOSPHATASE 2C; PROTEIN PHOSPHATASE 2C 16; protein serine/threonine phosphatase activity; Rossmann-like_a/b/a_fold; S…	catalytic activity; cation binding; protein dephosphorylation; protein serine/threonine phosphatase activity	GO:0003824; GO:0004722; GO:0006470; GO:0043169
TE_homo_78825	6.87608	0.00374664	Fvb4:27435614-27435914	Fvb4	27431098	27432767	FvH4_4g25740	+	2847	Downstream TTS	3.79383	1.51118e-26	AT4G12690.2 | DUF868 family protein (DUF868) | Chr4:7480896-7481753 FORWARD LENGTH=285 | 201606; PREDICTED: uncharacterized protein LOC105351839 [Fragaria vesca subsp. vesca]; tr|A0A2P6R161|A0A2P6R161_ROSCH Uncharacterized protein OS=Rosa chinensis OX=74649 GN=RchiOBHm_Chr4g0433181 PE=4 SV=1	disorder_prediction; DUF868; DUF868_pln; FAMILY NOT NAMED; FvH4_4g25740.t1_v4.0.a2;	NA	NA
TE_homo_86682	7.03306	0.00105261	Fvb5:11857779-11858038	Fvb5	11854268	11855510	FvH4_5g20100	-	2269	Upstream TSS	NA	NA	AT2G22740.2 | SU(VAR)3-9 homolog 6 | Chr2:9664256-9666628 REVERSE LENGTH=790 | 201606; PREDICTED: YDG domain-containing protein At5g47150-like [Fragaria vesca subsp. vesca] &gt;gi|764591237|ref|XP_011465235.1| PREDICTED: YDG domain-containing protein At5g47150-like [Fragaria vesca subsp. vesca] &gt;gi|764591243|ref|XP_011465236.1| PREDICTED: YDG domain-containing protein At5g47150-like [Fragaria …	disorder_prediction; FAMILY NOT NAMED; FvH4_5g20100.t1_v4.0.a2; HISTONE-LYSINE N-METHYLTRANSFERASE, H3 LYSINE-9 SPECIFIC SUVH5-RELATED; PUA domain-like; PUA-like_sf; SAD_SRA; SRA_YDG; SRA-YDG_sf; YDG	NA	NA
TE_homo_100759	7.75845	0.0303711	Fvb6:4743110-4743200	Fvb6	4738846	4742932	FvH4_6g07960	+	178	Downstream TTS	NA	NA	AT1G11340.1 | G-type lectin S-receptor-like Serine/Threonine-kinase | Chr1:3814116-3817216 REVERSE LENGTH=833 | 201606; G-type lectin S-receptor-like serine/threonine-protein kinase At1g11410 isoform X1 [Rosa chinensis]; sp|Q9ZT07|RKS1_ARATH G-type lectin S-receptor-like serine/threonine-protein kinase RKS1 OS=Arabidopsis thaliana OX=3702 GN=RKS1 PE=3 SV=3; tr|A0A2P6Q341|A0A2P6Q341_ROSCH Uncharac…	alpha-D-mannose-specific plant lectins; ATP binding; B_lectin; BULB_LECTIN; Bulb-type_lectin_dom; Bulb-type_lectin_dom_sf; FAMILY NOT NAMED; FvH4_6g07960.t1_v4.0.a2; Human cytomegalovirus infection; Human immunodeficiency virus 1 infection; Human papillomavirus infection; Kinase-like_dom_sf; mTOR signaling pathway; PAN; PAN_2; Pan_app; PAN_AP_plant; PI3K-Akt signaling pathway; Pkinase_Tyr; protei…	ATP binding; protein kinase activity; protein phosphorylation; protein serine/threonine kinase activity; recognition of pollen	GO:0004672; GO:0004674; GO:0005524; GO:0006468; GO:0048544
TE_struc_3391	8.05169	0.0402603	Fvb7:23747420-23747840	Fvb7	23749411	23752039	FvH4_7g33360	+	1572	Upstream TSS	3.15836	0.0173171	AT5G24680.1 | Peptidase C78%2C ubiquitin fold modifier-specific peptidase 1/ 2 | Chr5:8453666-8455358 FORWARD LENGTH=399 | 201606; PREDICTED: LOW QUALITY PROTEIN: zinc finger with UFM1-specific peptidase domain protein [Fragaria vesca subsp. vesca]; sp|Q5U2S3|ZUP1_RAT Zinc finger-containing ubiquitin peptidase 1 OS=Rattus norvegicus OX=10116 GN=Zup1 PE=2 SV=1; tr|A0A2P6SPL6|A0A2P6SPL6_ROSCH Putat…	FvH4_7g33360.t1_v4.0.a2; Peptidase_C78; Peptidase_C78_UfSP1/2; ; zinc finger protein	NA	NA
TE_struc_3391	8.05169	0.0402603	Fvb7:23747420-23747840	Fvb7	23749505	23750331	FvH4_7g33361	+	1666	Upstream TSS	NA	NA	PREDICTED: LOW QUALITY PROTEIN: zinc finger with UFM1-specific peptidase domain protein [Fragaria vesca subsp. vesca]; tr|A0A2P6SPL6|A0A2P6SPL6_ROSCH Putative peptidase C78, ubiquitin modifier-specific peptidase 1/ 2 OS=Rosa chinensis OX=74649 GN=RchiOBHm_Chr1g0383341 PE=4 SV=1	FvH4_7g33361.t1_v4.0.a2	NA	NA
TE_homo_47154	8.08269	0.0191345	Fvb3:23468981-23469247	Fvb3	23469840	23471776	FvH4_3g30250	-	594	Downstream TTS	NA	NA	AT5G22860.8 | Serine carboxypeptidase S28 family protein | Chr5:7641322-7642945 REVERSE LENGTH=366 | 201606; lysosomal Pro-X carboxypeptidase-like isoform X2 [Quercus suber]; sp|Q5RBU7|PCP_PONAB Lysosomal Pro-X carboxypeptidase OS=Pongo abelii OX=9601 GN=PRCP PE=2 SV=1; tr|A0A371H526|A0A371H526_MUCPR Lysosomal Pro-X carboxypeptidase (Fragment) OS=Mucuna pruriens OX=157652 GN=PRCP PE=4 SV=1	AB_hydrolase; alpha/beta-Hydrolases; FvH4_3g30250.t1_v4.0.a2; Peptidase_S28; PROTEASE S28 PRO-X CARBOXYPEPTIDASE-RELATED; proteolysis; Ser_carbopepase_S28_SKS; serine-type peptidase activity;	proteolysis; serine-type peptidase activity	GO:0006508; GO:0008236
TE_homo_92629	8.15624	0.0402603	Fvb5:20461860-20461977	Fvb5	20459157	20459733	FvH4_5g29492	+	2127	Downstream TTS	NA	NA	AT3G26230.1 | cytochrome P450%2C family 71%2C subfamily B%2C polypeptide 24 | Chr3:9598200-9599892 REVERSE LENGTH=498 | 201606; PREDICTED: cytochrome P450 71A1-like [Fragaria vesca subsp. vesca]; sp|P24465|C71A1_PERAE Cytochrome P450 71A1 OS=Persea americana OX=3435 GN=CYP71A1 PE=1 SV=2; tr|A0A2P6PRM0|A0A2P6PRM0_ROSCH Putative cytochrome P450 OS=Rosa chinensis OX=74649 GN=RchiOBHm_Chr6g0274021 PE…	Cytochrome P450; CYTOCHROME_P450; Cyt_P450; Cyt_P450_CS; Cyt_P450_E_grp-I; Cyt_P450_sf; EP450I; FAMILY NOT NAMED; FvH4_5g29492.t1_v4.0.a2; heme binding; iron ion binding; oxidation-reduction process; oxidoreductase activity, acting on paired donors, with incorporation or reduction of molecular oxygen; p450; P450	heme binding; iron ion binding; obsolete oxidation-reduction process; oxidoreductase activity, acting on paired donors, with incorporation or reduction of molecular oxygen	GO:0005506; GO:0016705; GO:0020037; GO:0055114
TE_homo_92629	8.15624	0.0402603	Fvb5:20461860-20461977	Fvb5	20463807	20465385	FvH4_5g29510	-	1831	Downstream TTS	0.696914	0.580528	AT1G28690.1 | Tetratricopeptide repeat (TPR)-like superfamily protein | Chr1:10080042-10081604 REVERSE LENGTH=520 | 201606; PREDICTED: pentatricopeptide repeat-containing protein At1g28690, mitochondrial [Fragaria vesca subsp. vesca]; sp|Q1PFQ9|PPR62_ARATH Pentatricopeptide repeat-containing protein At1g28690, mitochondrial OS=Arabidopsis thaliana OX=3702 GN=PCMP-E34 PE=2 SV=2; tr|A0A2P6Q4K0|A0A2…	disorder_prediction; FAMILY NOT NAMED; FvH4_5g29510.t1_v4.0.a2; Pentatricopeptide_repeat; PPR; PPR_2; protein binding; TIGR00756; TPR-like_helical_dom_sf	protein binding	GO:0005515
TE_homo_4458	8.23944	0.0212521	Fvb1:10698287-10698707	Fvb1	10694311	10695478	FvH4_1g18383	+	2809	Downstream TTS	NA	NA	AT4G23160.3 | cysteine-rich RECEPTOR-like kinase | Chr4:12129485-12133157 FORWARD LENGTH=1043 | 201606; putative RNA-directed DNA polymerase [Rosa chinensis]; sp|Q94HW2|POLR1_ARATH Retrovirus-related Pol polyprotein from transposon RE1 OS=Arabidopsis thaliana OX=3702 GN=RE1 PE=2 SV=1; tr|A0A2P6S100|A0A2P6S100_ROSCH Putative RNA-directed DNA polymerase OS=Rosa chinensis OX=74649 GN=RchiOBHm_Chr2g0…	Coil; DNA/RNA polymerases; FvH4_1g18383.t1_v4.0.a2; GAG-POL-RELATED RETROTRANSPOSON; retrotransposon nucleocapsid; Retrotran_Ty1/copia-like; RVT_2;	retrotransposon nucleocapsid	GO:0000943
TE_homo_106571	8.35648	0.0178504	Fvb6:14221651-14222256	Fvb6	14222486	14223077	FvH4_6g20640	+	231	Upstream TSS	NA	NA	AT5G02850.1 | hydroxyproline-rich glycoprotein family protein | Chr5:652159-653439 FORWARD LENGTH=426 | 201606; PREDICTED: mediator of RNA polymerase II transcription subunit 4-like [Fragaria vesca subsp. vesca]; sp|Q9LZ00|MED4_ARATH Mediator of RNA polymerase II transcription subunit 4 OS=Arabidopsis thaliana OX=3702 GN=MED4 PE=1 SV=1; tr|A0A315AP18|A0A315AP18_PRUYE Mediator of RNA polymerase II…	Coil; disorder_prediction; FvH4_6g20640.t1_v4.0.a2; Generic Transcription Pathway; Med4; mediator complex; Mediator_Med4; MEDIATOR OF RNA POLYMERASE II TRANSCRIPTION SUBUNIT 4; PPARA activates gene expression; regulation of transcription by RNA polymerase II; Transcriptional regulation of white adipocyte differentiation; transcription coregulator activity	mediator complex; regulation of transcription by RNA polymerase II; transcription coregulator activity	GO:0003712; GO:0006357; GO:0016592
TE_homo_106571	8.35648	0.0178504	Fvb6:14221651-14222256	Fvb6	14218162	14219329	FvH4_6g20630	+	2322	Downstream TTS	NA	NA	AT5G06490.1 | RING/U-box superfamily protein | Chr5:1977996-1978589 REVERSE LENGTH=197 | 201606; PREDICTED: RING-H2 finger protein ATL70-like [Fragaria vesca subsp. vesca]; sp|Q9FG21|ATL71_ARATH Putative RING-H2 finger protein ATL71 OS=Arabidopsis thaliana OX=3702 GN=ATL71 PE=3 SV=1; tr|M5VS68|M5VS68_PRUPE Uncharacterized protein OS=Prunus persica OX=3760 GN=PRUPE_7G092500 PE=4 SV=1	FAMILY NOT NAMED; FvH4_6g20630.t1_v4.0.a2; RING-H2_PA-TM-RING; RING/U-box; ; zf-RING_2; ZF_RING_2; Znf_RING; Znf_RING/FYVE/PHD	NA	NA
TE_homo_96242	8.83861	0.0220017	Fvb5:25711950-25712306	Fvb5	25715295	25717338	FvH4_5g35160	-	2990	Downstream TTS	NA	NA	AT5G06900.1 | cytochrome P450%2C family 93%2C subfamily D%2C polypeptide 1 | Chr5:2136160-2137925 REVERSE LENGTH=507 | 201606; PREDICTED: licodione synthase-like [Fragaria vesca subsp. vesca]; sp|P93149|C93B1_GLYEC Licodione synthase OS=Glycyrrhiza echinata OX=46348 GN=CYP93B1 PE=1 SV=2; tr|A0A2P6QI75|A0A2P6QI75_ROSCH Putative licodione synthase OS=Rosa chinensis OX=74649 GN=RchiOBHm_Chr5g0062571…	Cytochrome P450; CYTOCHROME_P450; Cyt_P450; Cyt_P450_CS; Cyt_P450_E_grp-I; Cyt_P450_sf; EP450I; FAMILY NOT NAMED; FvH4_5g35160.t1_v4.0.a2; heme binding; iron ion binding; oxidation-reduction process; oxidoreductase activity, acting on paired donors, with incorporation or reduction of molecular oxygen; p450; P450	heme binding; iron ion binding; obsolete oxidation-reduction process; oxidoreductase activity, acting on paired donors, with incorporation or reduction of molecular oxygen	GO:0005506; GO:0016705; GO:0020037; GO:0055114
TE_homo_52665	8.86596	0.00417111	Fvb3:29726221-29726494	Fvb3	29724313	29724544	FvH4_3g34240	+	1677	Downstream TTS	NA	NA	AT2G01710.1 | Chaperone DnaJ-domain superfamily protein | Chr2:315836-316771 FORWARD LENGTH=311 | 201606; PREDICTED: uncharacterized protein LOC101294174 [Fragaria vesca subsp. vesca]; sp|Q9UXR9|DNAJ_METTE Chaperone protein DnaJ OS=Methanosarcina thermophila OX=2210 GN=dnaJ PE=3 SV=1; tr|A6XN08|A6XN08_PRUPE Uncharacterized protein OS=Prunus persica OX=3760 GN=PRUPE_1G531000 PE=4 SV=1	CHAPERONE DNAJ-DOMAIN SUPERFAMILY PROTEIN; Chaperone J-domain; DnaJ; DNAJ_2; DnaJ_domain; FAMILY NOT NAMED; FvH4_3g34240.t1_v4.0.a2; JDOMAIN; J_dom_sf	NA	NA
TE_homo_22556	9.36056	0.00153007	Fvb2:11032753-11033103	Fvb2	11035379	11040775	FvH4_2g12570	+	2277	Upstream TSS	-3.91046	0.000185368	AT5G09360.1 | laccase 14 | Chr5:2906426-2908658 REVERSE LENGTH=569 | 201606; PREDICTED: putative laccase-9 [Fragaria vesca subsp. vesca]; sp|Q6Z8L2|LAC9_ORYSJ Putative laccase-9 OS=Oryza sativa subsp. japonica OX=39947 GN=LAC9 PE=3 SV=1; tr|A0A2P6PRE3|A0A2P6PRE3_ROSCH Laccase OS=Rosa chinensis OX=74649 GN=RchiOBHm_Chr6g0273101 PE=3 SV=1	apoplast; copper ion binding; Cu-oxidase; Cu-oxidase_2; Cu-oxidase_3; Cupredoxin; Cupredoxins; CuRO_1_LCC; CuRO_1_LCC_plant; CuRO_2_LCC; CuRO_2_LCC_plant; FvH4_2g12570.t1_v4.0.a2; hydroquinone:oxygen oxidoreductase activity; Justicidin B biosynthesis; Laccase; lignin catabolic process; Matairesinol biosynthesis; MULTI-COPPER OXIDASE; oxidation-reduction process; oxidoreductase activity; Sesamin b…	apoplast; copper ion binding; hydroquinone:oxygen oxidoreductase activity; lignin catabolic process; obsolete oxidation-reduction process; oxidoreductase activity	GO:0005507; GO:0016491; GO:0046274; GO:0048046; GO:0052716; GO:0055114
TE_homo_72574	9.7151	0.000939085	Fvb4:17972688-17972794	Fvb4	17973302	17976422	FvH4_4g14360	+	509	Upstream TSS	-3.65825	0.000159999	AT5G53130.1 | cyclic nucleotide gated channel 1 | Chr5:21537830-21540490 REVERSE LENGTH=716 | 201606; PREDICTED: cyclic nucleotide-gated ion channel 1-like [Fragaria vesca subsp. vesca]; sp|O65717|CNGC1_ARATH Cyclic nucleotide-gated ion channel 1 OS=Arabidopsis thaliana OX=3702 GN=CNGC1 PE=1 SV=1; tr|A0A251NEN2|A0A251NEN2_PRUPE Uncharacterized protein OS=Prunus persica OX=3760 GN=PRUPE_7G210600 P…	cAMP-binding domain-like; CAP_ED; cNMP-bd_dom; cNMP-bd-like; CNMP_BINDING_3; Coil; CYCLIC NUCLEOTIDE-GATED ION CHANNEL 1; FAMILY NOT NAMED; FvH4_4g14360.t1_v4.0.a2; RmlC-like_jellyroll; Voltage-gated potassium channels	NA	NA
TE_homo_72574	9.7151	0.000939085	Fvb4:17972688-17972794	Fvb4	17968335	17970547	FvH4_4g14350	+	2141	Downstream TTS	NA	NA	AT1G79910.1 | Regulator of Vps4 activity in the MVB pathway protein | Chr1:30055050-30057011 FORWARD LENGTH=381 | 201606; PREDICTED: protein IWS1 homolog A [Fragaria vesca subsp. vesca]; tr|A0A2P6RWS2|A0A2P6RWS2_ROSCH Putative vacuolar protein sorting-associated protein Ist1 OS=Rosa chinensis OX=74649 GN=RchiOBHm_Chr2g0138021 PE=4 SV=1	FvH4_4g14350.t1_v4.0.a2; Ist1; IST1-like; Neutrophil degranulation; protein transport; ; UNCHARACTERIZED DUF292	protein transport	GO:0015031
TE_homo_125377	10.1099	0.000178981	Fvb7:4397859-4397941	Fvb7	4398984	4399398	FvH4_7g03860	+	1044	Upstream TSS	NA	NA	NA	FvH4_7g03860.t1_v4.0.a2	NA	NA
TE_homo_71363	10.4723	7.52536e-05	Fvb4:16317709-16318313	Fvb4	16320248	16323880	FvH4_4g12660	+	1936	Upstream TSS	1.27303	0.00228685	AT4G21800.2 | P-loop containing nucleoside triphosphate hydrolases superfamily protein | Chr4:11573289-11574976 FORWARD LENGTH=379 | 201606; PREDICTED: GPN-loop GTPase 1 [Fragaria vesca subsp. vesca]; sp|Q8W586|QQT2_ARATH GPN-loop GTPase QQT2 OS=Arabidopsis thaliana OX=3702 GN=QQT2 PE=1 SV=1; tr|A0A2P6QVM0|A0A2P6QVM0_ROSCH GPN-loop GTPase OS=Rosa chinensis OX=74649 GN=RchiOBHm_Chr4g0411531 PE=3 S…	ATP_bind_1; Coil; disorder_prediction; FvH4_4g12660.t1_v4.0.a2; Gpn; P-loop containing nucleoside triphosphate hydrolases; P-loop_NTPase; Ras_like_GTPase; ; XPA-BINDING PROTEIN 1-RELATED	NA	NA

## Sheet: MITEs & Genes - Ripe vs Immatur
MITE_ID	log2FoldChange	padj	Coords	Gene_Chr	Gene_Start	Gene_End	Gene_ID	Gene_Strand	Distance_MITE_from_Gene	Location_MITE_from_Gene	log2FC_gene_RedvsWhite	padj_gene_RedvsWhite	BLAST	InterPro	GO Term	GO Accession
TE_homo_73814	-6.91641	0.0464666	Fvb4:19582403-19582665	Fvb4	19583902	19584566	FvH4_4g15672	-	1238	Downstream TTS	NA	NA	AT3G42170.1 | BED zinc finger and hAT dimerization domain-containing protein DAYSLEEPER | Chr3:14321838-14323928 FORWARD LENGTH=696 | 201606; sp|P08770|TRA1_MAIZE Putative AC transposase OS=Zea mays OX=4577 PE=2 SV=2; tr|A0A2P6S553|A0A2P6S553_ROSCH Putative transcription factor/ chromatin remodeling BED-type(Zn) family OS=Rosa chinensis OX=74649 GN=RchiOBHm_Chr2g0170381 PE=4 SV=1; zinc finger BED…	BED FINGER-RELATED; Dimer_Tnp_hAT; disorder_prediction; FvH4_4g15672.t1_v4.0.a2; HATC_C_dom; protein dimerization activity; Ribonuclease H-like; RNaseH-like_sf; ""> <signature-library-release library=	protein dimerization activity	GO:0046983
TE_struc_2131	-6.56538	0.0385961	Fvb5:14800287-14800689	Fvb5	14795185	14798023	FvH4_5g23460	-	2264	Upstream TSS	1.5835	0.483671	AT3G07040.1 | NB-ARC domain-containing disease resistance protein | Chr3:2226244-2229024 REVERSE LENGTH=926 | 201606; PREDICTED: disease resistance protein RPM1-like [Fragaria vesca subsp. vesca]; sp|Q39214|RPM1_ARATH Disease resistance protein RPM1 OS=Arabidopsis thaliana OX=3702 GN=RPM1 PE=1 SV=1; tr|A0A2P6PAT4|A0A2P6PAT4_ROSCH Putative P-loop containing nucleoside triphosphate hydrolase, leuci…	Activation of caspases through apoptosome-mediated cleavage; ADP binding; Coil; DISEASERSIST; Formation of apoptosome; FvH4_5g23460.t1_v4.0.a2; L domain-like; LEUCINE-RICH REPEAT-CONTAINING PROTEIN; LRR_dom_sf; NB-ARC; Neutrophil degranulation; P-loop containing nucleoside triphosphate hydrolases; P-loop_NTPase; Regulation of the apoptosome activity; RX-CC_like; RX-like_CC; Rx_N; ""> <signature-l…	ADP binding	GO:0043531
TE_struc_2131	-6.56538	0.0385961	Fvb5:14800287-14800689	Fvb5	14802345	14805192	FvH4_5g23470	-	1657	Downstream TTS	-1.84293	0.015285	AT3G07040.1 | NB-ARC domain-containing disease resistance protein | Chr3:2226244-2229024 REVERSE LENGTH=926 | 201606; PREDICTED: disease resistance protein RPM1-like [Fragaria vesca subsp. vesca] &gt;gi|764590007|ref|XP_011465086.1| PREDICTED: disease resistance protein RPM1-like [Fragaria vesca subsp. vesca]; sp|Q39214|RPM1_ARATH Disease resistance protein RPM1 OS=Arabidopsis thaliana OX=3702 GN…	Activation of caspases through apoptosome-mediated cleavage; ADP binding; DISEASERSIST; Formation of apoptosome; FvH4_5g23470.t1_v4.0.a2; L domain-like; LEUCINE-RICH REPEAT-CONTAINING PROTEIN; LRR_dom_sf; NB-ARC; Neutrophil degranulation; P-loop containing nucleoside triphosphate hydrolases; P-loop_NTPase; Regulation of the apoptosome activity; RX-CC_like; RX-like_CC; Rx_N; ""> <signature-library…	ADP binding	GO:0043531
TE_homo_29278	-6.54934	0.0207918	Fvb2:22469195-22469405	Fvb2	22465663	22468618	FvH4_2g28770	-	577	Upstream TSS	0.0988904	0.866576	AT2G25310.1 | ER membrane protein complex subunit-like protein (DUF2012) | Chr2:10777436-10779123 REVERSE LENGTH=210 | 201606; PREDICTED: ER membrane protein complex subunit 7 homolog [Fragaria vesca subsp. vesca]; sp|Q8VY97|Y4213_ARATH ER membrane protein complex subunit 7 homolog OS=Arabidopsis thaliana OX=3702 GN=At4g32130 PE=2 SV=1; tr|A0A2P6PXP8|A0A2P6PXP8_ROSCH Putative carbohydrate-binding…	Carb-bd-like_fold; carbohydrate binding; DUF2012; EMC7; FvH4_2g28770.t1_v4.0.a2; ""> <signature-library-release library=; Starch-binding domain-like; UNCHARACTERIZED	carbohydrate binding	GO:0030246
TE_homo_29278	-6.54934	0.0207918	Fvb2:22469195-22469405	Fvb2	22469806	22473789	FvH4_2g28780	-	402	Downstream TTS	0.26261	0.354106	AT4G32140.1 | EamA-like transporter family | Chr4:15523037-15525195 REVERSE LENGTH=394 | 201606; PREDICTED: thiamine-repressible mitochondrial transport protein THI74 isoform X1 [Fragaria vesca subsp. vesca]; sp|Q03730|YMB8_YEAST Uncharacterized vacuolar membrane protein YML018C OS=Saccharomyces cerevisiae (strain ATCC 204508 / S288c) OX=559292 GN=YML018C PE=1 SV=1; tr|A0A2P6PXT7|A0A2P6PXT7_ROSCH…	EamA; EamA_dom; FvH4_2g28780.t1_v4.0.a2; integral component of membrane; membrane; Multidrug resistance efflux transporter EmrE; ""> <signature-library-release library=; SOLUTE CARRIER FAMILY 35, MEMBER F5	integral to membrane; membrane	GO:0016020; GO:0016021
TE_homo_101161	-3.72692	0.0443011	Fvb6:5552916-5553224	Fvb6	5555100	5555567	FvH4_6g09340	+	1877	Upstream TSS	NA	NA	AT1G73050.1 | Glucose-methanol-choline (GMC) oxidoreductase family protein | Chr1:27476565-27478534 REVERSE LENGTH=552 | 201606; PREDICTED: (R)-mandelonitrile lyase-like [Fragaria vesca subsp. vesca]; sp|Q9SSM2|MDLL_ARATH (R)-mandelonitrile lyase-like OS=Arabidopsis thaliana OX=3702 GN=At1g73050 PE=2 SV=1; tr|A0A2P6QTM4|A0A2P6QTM4_ROSCH Putative (R)-mandelonitrile lyase OS=Rosa chinensis OX=74649…	Choline catabolism; FAD-linked reductases, C-terminal domain; FAD/NAD-bd_sf; FAD/NAD(P)-binding domain; FAMILY NOT NAMED; FvH4_6g09340.t1_v4.0.a2; GMC_oxred_C; GMC_OxRtase_C; oxidation-reduction process; oxidoreductase activity, acting on CH-OH group of donors; ""> <signature-library-release library=	obsolete oxidation-reduction process; oxidoreductase activity, acting on CH-OH group of donors	GO:0016614; GO:0055114
TE_homo_4768	-3.00969	0.000773047	Fvb1:11274552-11274971	Fvb1	11264095	11271834	FvH4_1g19010	+	2718	Downstream TTS	-2.0056	1.16746e-11	AT1G67720.1 | Leucine-rich repeat protein kinase family protein | Chr1:25386494-25390856 FORWARD LENGTH=929 | 201606; PREDICTED: nodulation receptor kinase-like [Fragaria vesca subsp. vesca]; sp|Q8LKZ1|NORK_PEA Nodulation receptor kinase OS=Pisum sativum OX=3888 GN=NORK PE=1 SV=1; tr|A0A314Y5W9|A0A314Y5W9_PRUYE Nodulation receptor kinase OS=Prunus yedoensis var. nudiflora OX=2094558 GN=Pyn_05603 …	ATP binding; disorder_prediction; FAMILY NOT NAMED; FvH4_1g19010.t1_v4.0.a2; Kinase-like_dom_sf; L domain-like; LRR_dom_sf; Malectin_like; Malectin-like_Carb-bd_dom; Pkinase_Tyr; protein kinase activity; PROTEIN_KINASE_ATP; Protein_kinase_ATP_BS; PROTEIN_KINASE_DOM; Protein kinase-like (PK-like); PROTEIN_KINASE_ST; protein phosphorylation; Prot_kinase_dom; Ser/Thr_kinase_AS; Ser-Thr/Tyr_kinase_ca…	ATP binding; protein kinase activity; protein phosphorylation	GO:0004672; GO:0005524; GO:0006468
TE_homo_58780	-2.91266	0.0193592	Fvb4:1194479-1194737	Fvb4	1196988	1200607	FvH4_4g01312	-	2252	Downstream TTS	-2.8815	2.40814e-07	NA	disorder_prediction; FvH4_4g01312.t1_v4.0.a2	NA	NA
TE_homo_5452	-2.7982	0.0443011	Fvb1:12219150-12219577	Fvb1	12221740	12224996	FvH4_1g20050	-	2164	Downstream TTS	1.19254	1.00953e-11	AT2G22475.1 | GRAM domain family protein | Chr2:9541523-9544778 FORWARD LENGTH=299 | 201606; PREDICTED: GLABRA2 expression modulator-like [Fragaria vesca subsp. vesca]; sp|Q8S8F8|GEM_ARATH GLABRA2 expression modulator OS=Arabidopsis thaliana OX=3702 GN=GEM PE=1 SV=1; tr|A0A2P6RQ62|A0A2P6RQ62_ROSCH Putative GRAM domain-containing protein OS=Rosa chinensis OX=74649 GN=RchiOBHm_Chr2g0112041 PE=4 SV=1	disorder_prediction; FAMILY NOT NAMED; FvH4_1g20050.t1_v4.0.a2; GEM-like; GEM-LIKE PROTEIN 3-RELATED; GRAM; PH-GRAM_GEM; PH-like_dom_sf	NA	NA
TE_homo_81357	1.50995	0.0464666	Fvb4:33770225-33770627	Fvb4	33770667	33771085	FvH4_4g37182	-	41	Downstream TTS	NA	NA	NA	disorder_prediction; FvH4_4g37182.t1_v4.0.a2	NA	NA
TE_homo_81357	1.50995	0.0464666	Fvb4:33770225-33770627	Fvb4	33770981	33772396	FvH4_4g37190	-	355	Downstream TTS	0.351101	0.699755	AT5G08350.1 | GRAM domain-containing protein / ABA-responsive protein-like protein | Chr5:2686417-2687175 REVERSE LENGTH=222 | 201606; PREDICTED: GEM-like protein 7 [Fragaria vesca subsp. vesca]; sp|Q9FTA0|GEML4_ARATH GEM-like protein 4 OS=Arabidopsis thaliana OX=3702 GN=At5g08350 PE=2 SV=1; tr|A0A2P6R4T3|A0A2P6R4T3_ROSCH Putative GRAM domain, PH domain-containing protein OS=Rosa chinensis OX=746…	disorder_prediction; FAMILY NOT NAMED; FvH4_4g37190.t1_v4.0.a2; GEM-like; GEM-LIKE PROTEIN 4; GRAM; PH-like_dom_sf; PROKAR_LIPOPROTEIN	NA	NA
TE_homo_106387	1.56069	0.0126126	Fvb6:13948930-13949337	Fvb6	13945402	13946457	FvH4_6g20342	-	2473	Upstream TSS	NA	NA	tr|A0A2P6QC43|A0A2P6QC43_ROSCH Putative ribonuclease H-like domain-containing protein OS=Rosa chinensis OX=74649 GN=RchiOBHm_Chr5g0038961 PE=4 SV=1; uncharacterized protein LOC112164413 [Rosa chinensis]	FAMILY NOT NAMED; FvH4_6g20342.t1_v4.0.a2; nucleic acid binding; POLYNUCLEOTIDYL TRANSFERASE, RIBONUCLEASE H-LIKE SUPERFAMILY PROTEIN; RNA-DNA hybrid ribonuclease activity; RNaseH_domain; RNase_H_like; RNaseH_sf; RVT_3	nucleic acid binding; RNA-DNA hybrid ribonuclease activity	GO:0003676; GO:0004523
TE_homo_106387	1.56069	0.0126126	Fvb6:13948930-13949337	Fvb6	13950478	13955299	FvH4_6g20350	+	1142	Upstream TSS	0.762914	0.00248666	AT2G35940.3 | BEL1-like homeodomain 1 | Chr2:15089171-15091699 REVERSE LENGTH=680 | 201606; PREDICTED: BEL1-like homeodomain protein 1 [Fragaria vesca subsp. vesca]; sp|Q9SJ56|BLH1_ARATH BEL1-like homeodomain protein 1 OS=Arabidopsis thaliana OX=3702 GN=BLH1 PE=1 SV=1; tr|A0A2P6RCJ7|A0A2P6RCJ7_ROSCH Putative transcription factor Homobox-WOX family OS=Rosa chinensis OX=74649 GN=RchiOBHm_Chr3g04759…	disorder_prediction; DNA binding; FvH4_6g20350.t1_v4.0.a2; FvH4_6g20350.t2_v4.0.a2; FvH4_6g20350.t3_v4.0.a2; FvH4_6g20350.t4_v4.0.a2; FvH4_6g20350.t5_v4.0.a2; FvH4_6g20350.t6_v4.0.a2; FvH4_6g20350.t7_v4.0.a2; FvH4_6g20350.t8_v4.0.a2; FvH4_6g20350.t9_v4.0.a2; HOMEOBOX_2; Homeobox_dom; Homeobox_KN; Homeobox_KN_domain; Homeobox-like_sf; HOMEOBOX PROTEIN TRANSCRIPTION FACTORS; homeodomain; Homeodomai…	DNA binding; regulation of DNA-templated transcription	GO:0003677; GO:0006355
TE_struc_1262	1.61716	0.015417	Fvb3:29757264-29757661	Fvb3	29757730	29768550	FvH4_3g34270	+	70	Upstream TSS	-0.718765	0.118649	AT3G45780.2 | phototropin 1 | Chr3:16818557-16823960 FORWARD LENGTH=996 | 201606; PREDICTED: phototropin-1 isoform X1 [Fragaria vesca subsp. vesca]; sp|O48963|PHOT1_ARATH Phototropin-1 OS=Arabidopsis thaliana OX=3702 GN=PHOT1 PE=1 SV=1; tr|J7M8M9|J7M8M9_FRAAN Phototropin 1 OS=Fragaria ananassa OX=3747 GN=phot1 PE=2 SV=1	ATP binding; Coil; disorder_prediction; FAMILY NOT NAMED; FvH4_3g34270.t1_v4.0.a2; FvH4_3g34270.t2_v4.0.a2; Kinase-like_dom_sf; PAC; PAS; PAS_9; PAS-assoc_C; PAS-like_dom_sf; PHOTOTROPIN-1; Pkinase; protein kinase activity; PROTEIN_KINASE_ATP; Protein_kinase_ATP_BS; PROTEIN_KINASE_DOM; Protein kinase-like (PK-like); PROTEIN_KINASE_ST; protein phosphorylation; Prot_kinase_dom; PYP-like sensor doma…	ATP binding; protein kinase activity; protein phosphorylation	GO:0004672; GO:0005524; GO:0006468
TE_homo_99981	2.10954	0.0343206	Fvb6:3293475-3293732	Fvb6	3289083	3290812	FvH4_6g05780	-	2663	Upstream TSS	-2.89258	NA	AT3G05327.1 | Cyclin family protein | Chr3:1517581-1518399 REVERSE LENGTH=212 | 201606; PREDICTED: cyclin-P3-1 [Fragaria vesca subsp. vesca]; sp|Q75HV0|CCP31_ORYSJ Cyclin-P3-1 OS=Oryza sativa subsp. japonica OX=39947 GN=CYCP3-1 PE=3 SV=1; tr|A0A2P6R6Y2|A0A2P6R6Y2_ROSCH Cyclin OS=Rosa chinensis OX=74649 GN=RchiOBHm_Chr3g0454701 PE=3 SV=1	Cyclin; CYCLIN FAMILY PROTEIN-RELATED; Cyclin-like; Cyclin-like_sf; Cyclin_PHO80-like; FvH4_6g05780.t1_v4.0.a2; protein kinase binding; regulation of cyclin-dependent protein serine/threonine kinase activity; UNCHARACTERIZED	protein kinase binding; regulation of cyclin-dependent protein serine/threonine kinase activity	GO:0000079; GO:0019901
TE_homo_99981	2.10954	0.0343206	Fvb6:3293475-3293732	Fvb6	3295763	3303127	FvH4_6g05800	+	2032	Upstream TSS	0.0749098	0.880283	AT1G09000.1 | NPK1-related protein kinase 1 | Chr1:2891111-2894987 FORWARD LENGTH=666 | 201606; PREDICTED: mitogen-activated protein kinase kinase kinase ANP1 [Fragaria vesca subsp. vesca]; sp|O22040|ANP1_ARATH Mitogen-activated protein kinase kinase kinase ANP1 OS=Arabidopsis thaliana OX=3702 GN=ANP1 PE=1 SV=2; tr|A0A2P6R6X6|A0A2P6R6X6_ROSCH Putative mitogen-activated protein kinase kinase kinas…	ATP binding; Coil; disorder_prediction; FvH4_6g05800.t1_v4.0.a2; Kinase-like_dom_sf; MITOGEN-ACTIVATED KINASE KINASE KINASE; Pkinase; protein kinase activity; PROTEIN_KINASE_ATP; Protein_kinase_ATP_BS; PROTEIN_KINASE_DOM; Protein kinase-like (PK-like); PROTEIN_KINASE_ST; protein phosphorylation; Prot_kinase_dom; Ser/Thr_kinase_AS; ""> <signature-library-release library=; STKc_MAPKKK; TyrPK_CSF1-R	ATP binding; protein kinase activity; protein phosphorylation	GO:0004672; GO:0005524; GO:0006468
TE_homo_23092	3.39978	0.0376746	Fvb2:11784021-11784396	Fvb2	11782008	11783699	FvH4_2g13500	-	322	Upstream TSS	1.83686	0.00266853	AT2G14095.1 | hypothetical protein | Chr2:5932506-5933752 REVERSE LENGTH=234 | 201606; PREDICTED: uncharacterized protein LOC101310960 [Fragaria vesca subsp. vesca]; tr|A0A2P6PGZ6|A0A2P6PGZ6_ROSCH Uncharacterized protein OS=Rosa chinensis OX=74649 GN=RchiOBHm_Chr7g0236611 PE=4 SV=1	Coil; EXPRESSED PROTEIN; FAMILY NOT NAMED; FvH4_2g13500.t1_v4.0.a2	NA	NA
TE_homo_131661	3.60702	5.76391e-19	Fvb7:15464894-15465309	Fvb7	15467223	15471989	FvH4_7g18570	+	1915	Upstream TSS	10.752	2.1477e-100	AT3G26040.1 | HXXXD-type acyl-transferase family protein | Chr3:9519741-9521069 FORWARD LENGTH=442 | 201606; PREDICTED: vinorine synthase-like [Fragaria vesca subsp. vesca]; sp|Q70PR7|VINSY_RAUSE Vinorine synthase OS=Rauvolfia serpentina OX=4060 GN=ACT PE=1 SV=2; tr|A0A1J0CLC8|A0A1J0CLC8_FRAAN Alcohol acyltransferase OS=Fragaria ananassa OX=3747 GN=AAT PE=2 SV=1	CAT-like_dom_sf; FAMILY NOT NAMED; FvH4_7g18570.t1_v4.0.a2; Glyoxylate metabolism and glycine degradation; ""> <signature-library-release library=; Transferase; transferase activity, transferring acyl groups other than amino-acyl groups	acyltransferase activity, transferring groups other than amino-acyl groups	GO:0016747
TE_homo_131661	3.60702	5.76391e-19	Fvb7:15464894-15465309	Fvb7	15459592	15462054	FvH4_7g18550	+	2840	Downstream TTS	6.70168	4.0918e-09	AT3G54940.2 | Papain family cysteine protease | Chr3:20354402-20356127 FORWARD LENGTH=367 | 201606; probable cysteine protease RD19D [Rosa chinensis] &gt;gi|1358184243|gb|PRQ58717.1| putative cathepsin L [Rosa chinensis]; sp|Q8VYS0|RD19D_ARATH Probable cysteine protease RD19D OS=Arabidopsis thaliana OX=3702 GN=RD19D PE=2 SV=1; tr|A0A2P6SJ69|A0A2P6SJ69_ROSCH Putative cathepsin L OS=Rosa chinensis …	CYSTEINE PROTEASE FAMILY C1-RELATED; Cysteine proteinases; cysteine-type peptidase activity; FvH4_7g18550.t1_v4.0.a2; Inhibitor_I29; MHC class II antigen presentation; PAPAIN; Papain-like_cys_pep_sf; Pept_asp_AS; Pept_cys_AS; Pept_his_AS; Peptidase_C1; Peptidase_C1A; Peptidase_C1A_C; Peptidase_C1A_papain-like; proteolysis; Prot_inhib_I29; ""> <signature-library-release library=; THIOL_PROTEASE_AS…	cysteine-type peptidase activity; proteolysis	GO:0006508; GO:0008234
