# Supplementary material for: Naturally occurring variation in gene-associated transposable elements impacts gene expression and phenotypic diversity in woodland strawberry
Source: Research Square preprint supplement (doi:10.21203/rs.3.rs-6266511/v1), 2025-04-22
Supplement: Supplementary file 4 [file 73bce74331d694c272859e22.xlsx]

## Sheet: Results_ShortStack_MITEs
Locus	Name	Chrom	Start	End	Length	Reads	DistinctSequences	FracTop	Strand	MajorRNA	MajorRNAReads	Short	Long	21	22	23	24	DicerCall	MIRNA
Fvb1:777783-778062	TE_homo_244	Fvb1	777783	778062	280	91	19	0.901	+	ACUGGAAUUCGGCGGACUCGC	37	1	1	44	0	7	38	21	N
Fvb1:2274851-2275296	TE_homo_767	Fvb1	2274851	2275296	446	525	92	0.834	+	UAUGAAAUUUUGUAGAGGUGA	223	9	2	294	65	20	135	21	N
Fvb1:7728735-7728830	TE_homo_2932	Fvb1	7728735	7728830	96	1	1	1	+	CGAGACACUGUUUACGGGACA	1	0	0	1	0	0	0	21	N
Fvb1:10811677-10812118	TE_homo_4528	Fvb1	10811677	10812118	442	2	2	0.5	.	GGGGCUGUAUAUAUAUAUAUAUA	1	0	0	1	0	1	0	21	N
Fvb1:11891868-11892104	TE_homo_5243	Fvb1	11891868	11892104	237	29	17	0.448	.	CGGAAAACUGGAAUUCGGUGG	5	4	1	16	1	0	7	21	N
Fvb1:12488099-12488439	TE_homo_5599	Fvb1	12488099	12488439	341	2	2	0	-	GUGCUCCACAUCGUUUCCGGAUA	1	0	0	1	0	1	0	21	N
Fvb1:14487247-14487415	TE_homo_6989	Fvb1	14487247	14487415	169	1	1	1	+	CCGUGAAAAGUUCUGAAAACU	1	0	0	1	0	0	0	21	N
Fvb1:16197282-16197443	TE_homo_8089	Fvb1	16197282	16197443	162	2	2	0	-	CACUGUCUGGUUCGUCAGGAG	1	0	0	1	0	0	1	21	N
Fvb1:17119009-17119178	TE_homo_8660	Fvb1	17119009	17119178	170	110	31	0.718	.	AAUAUGAUGUCACCAAACUGA	55	0	0	58	9	9	34	21	N
Fvb1:17293224-17293345	TE_homo_8749	Fvb1	17293224	17293345	122	2	2	1	+	CCACUGGUUGGUUAAGGUGAGCCG	1	0	0	1	0	0	1	21	N
Fvb1:18677941-18678233	TE_homo_9832	Fvb1	18677941	18678233	293	133	44	0.774	.	ACUGGAAUUCGGCGGACUCGC	39	17	1	53	3	11	48	21	N
Fvb1:20009787-20010225	TE_homo_10895	Fvb1	20009787	20010225	439	1202	363	0.177	-	AAUAUGAUGUCACCAAACUGA	235	35	12	516	191	142	306	21	N
Fvb1:20043851-20044015	TE_homo_10925	Fvb1	20043851	20044015	165	70	40	0.871	+	UGGAGAACGGAGGGACGGCCA	9	6	1	30	5	5	23	21	N
Fvb1:20072980-20073440	TE_struc_285	Fvb1	20072980	20073440	461	177	79	0.169	-	UCACGUUGGUCCUUGCACUCU	63	12	3	92	17	13	40	21	N
Fvb1:20844842-20845009	TE_homo_11660	Fvb1	20844842	20845009	168	1	1	0	-	AACAUCUCUGGACGAAUUAGA	1	0	0	1	0	0	0	21	N
Fvb1:22900402-22900510	TE_homo_13695	Fvb1	22900402	22900510	109	1	1	0	-	UUAAAGAAACGAAAACCGCCU	1	0	0	1	0	0	0	21	N
Fvb1:22919552-22919642	TE_homo_13711	Fvb1	22919552	22919642	91	2	2	0.5	.	CGCUAGGUUAUUUUGUCUUUUAAU	1	0	0	1	0	0	1	21	N
Fvb1:23234404-23234565	TE_homo_14007	Fvb1	23234404	23234565	162	2	2	0	-	UCGCAAACGAAGUUGACUGUC	1	0	0	1	0	0	1	21	N
Fvb2:3730656-3730904	TE_homo_17116	Fvb2	3730656	3730904	249	526	129	0.167	-	AAACUGGAAAAUAAUGGACUC	215	73	5	285	25	25	113	21	N
Fvb2:5781077-5781390	TE_homo_18507	Fvb2	5781077	5781390	314	106	42	0.708	.	AAACUGGAAUUCGACGGACUC	33	5	0	45	9	2	45	21	N
Fvb2:7832503-7832699	TE_homo_20131	Fvb2	7832503	7832699	197	2	2	0.5	.	AAAUCCAAUCAACUAGCCAAUGAA	1	0	0	1	0	0	1	21	N
Fvb2:9570909-9571092	TE_struc_513	Fvb2	9570909	9571092	184	32	8	1	+	UUGUCAAAUUUGCUGGUUGGG	15	0	0	21	9	0	2	21	N
Fvb2:10841053-10841138	TE_homo_22386	Fvb2	10841053	10841138	86	2	2	0.5	.	CUGAGAAUCCCUGCAUAUAUAUA	1	0	0	1	0	1	0	21	N
Fvb2:11028500-11028638	TE_homo_22548	Fvb2	11028500	11028638	139	1	1	0	-	AAAAAAAUACAUGAUGUUUGA	1	0	0	1	0	0	0	21	N
Fvb2:15064826-15064928	TE_homo_25434	Fvb2	15064826	15064928	103	1	1	0	-	UUACAUAAUGGAAAGAUCAUU	1	0	0	1	0	0	0	21	N
Fvb2:26794753-26795200	TE_struc_747	Fvb2	26794753	26795200	448	118	53	0.915	+	UUCGCCGGAGGAGAACACAGC	28	8	1	65	25	5	14	21	N
Fvb3:799659-799836	TE_homo_31910	Fvb3	799659	799836	178	4	2	0.25	.	UUUAUUAGGGUUGCUAUUACU	3	0	0	3	0	0	1	21	N
Fvb3:799874-799971	TE_homo_31911	Fvb3	799874	799971	98	7	6	0.143	-	UGUUUGAUGCAACUGAACAAG	2	0	0	2	1	2	2	21	N
Fvb3:3224312-3224575	TE_homo_33003	Fvb3	3224312	3224575	264	1249	372	0.321	.	UCCGUCCGUUGUCCACCCUUUGGC	118	159	12	454	127	89	408	21	N
Fvb3:3338666-3339096	TE_struc_846	Fvb3	3338666	3339096	431	4	3	0.25	.	AUGCGACUGUCGUGUCUCGUGUCU	2	0	0	2	0	0	2	21	N
Fvb3:5314609-5314777	TE_homo_34059	Fvb3	5314609	5314777	169	4	3	0.75	.	CAUUCUGCGCGGAAAUUUUUA	2	0	0	2	0	0	2	21	N
Fvb3:8477626-8477732	TE_homo_35585	Fvb3	8477626	8477732	107	2	2	0.5	.	AGUCCUUGUGGUUUAAAGUCGACA	1	0	0	1	0	0	1	21	N
Fvb3:11040590-11040878	TE_homo_37295	Fvb3	11040590	11040878	289	429	70	0.916	+	AACUUUUGAAAGUCUUAACGA	294	13	1	327	6	13	69	21	N
Fvb3:16737769-16737853	TE_homo_41307	Fvb3	16737769	16737853	85	1	1	1	+	CAAAAAAUCUGAAUACAAGGA	1	0	0	1	0	0	0	21	N
Fvb3:17410111-17410279	TE_homo_41804	Fvb3	17410111	17410279	169	8	5	0.875	+	UCCGGACGAACCAGACAGUGA	3	1	0	3	0	2	2	21	N
Fvb3:17788393-17788730	TE_homo_42102	Fvb3	17788393	17788730	338	913	156	0.867	+	AAACUGGAAUUCGACGGACUC	224	24	2	414	109	132	232	21	N
Fvb3:18077287-18077729	TE_homo_42326	Fvb3	18077287	18077729	443	56	18	0.036	-	AAUUUUUGAAAGUCUUAACGA	21	2	0	21	2	17	14	21	N
Fvb3:20823732-20824040	TE_homo_44914	Fvb3	20823732	20824040	309	282	48	0.936	+	CUGGAAUUCGGCGGACUCGCC	131	5	0	134	16	1	126	21	N
Fvb3:20839838-20839927	TE_homo_44927	Fvb3	20839838	20839927	90	1	1	0	-	AACCAAUUGAGGACUUUCUCA	1	0	0	1	0	0	0	21	N
Fvb3:22856621-22856737	TE_homo_46639	Fvb3	22856621	22856737	117	75	34	0.12	-	UUUUGUCGACCAGCAAAGUUG	12	5	1	44	2	4	19	21	N
Fvb3:24279104-24279397	TE_homo_47808	Fvb3	24279104	24279397	294	182	29	0.923	+	AAACUGGAAUUCGACGGACUC	107	0	1	145	5	1	30	21	N
Fvb3:26349680-26349862	TE_homo_49804	Fvb3	26349680	26349862	183	1	1	1	+	UAGGGUAGAAAAUUGGCAGAA	1	0	0	1	0	0	0	21	N
Fvb3:26349788-26349987	TE_homo_49805	Fvb3	26349788	26349987	200	1	1	1	+	UAGGGUAGAAAAUUGGCAGAA	1	0	0	1	0	0	0	21	N
Fvb3:26507872-26508166	TE_homo_49927	Fvb3	26507872	26508166	295	17	13	0.118	-	UUGAAAGUGUAGGGACUAACA	3	2	0	7	0	2	6	21	N
Fvb3:31346294-31346878	TE_struc_1289	Fvb3	31346294	31346878	585	48	33	0.208	.	AGAGCCGGAGAGGACCUGGGU	11	5	0	21	11	8	3	21	N
Fvb3:33054684-33054950	TE_homo_54890	Fvb3	33054684	33054950	267	5	5	0.8	+	UCCGUUCUCCAUCCUCCGGCACC	1	0	0	2	0	1	2	21	N
Fvb3:33523720-33523954	TE_homo_55216	Fvb3	33523720	33523954	235	118	62	0.551	.	AAGAGAAGGGCCGUCGCCGGC	31	10	5	45	4	10	44	21	N
Fvb3:34365505-34365771	TE_homo_55707	Fvb3	34365505	34365771	267	3	3	0	-	CGGGUAUGGUAUUUUGAUAUU	1	0	0	2	0	0	1	21	N
Fvb4:292283-292484	TE_homo_58163	Fvb4	292283	292484	202	92	61	0.63	.	AAAAAACGGACUCGCCGGGGA	11	10	1	37	2	9	33	21	N
Fvb4:817969-818173	TE_homo_58496	Fvb4	817969	818173	205	4	4	0	-	UUGCAGACAUUGUAUCUAUCCUAA	1	0	0	2	0	0	2	21	N
Fvb4:853008-853181	TE_homo_58535	Fvb4	853008	853181	174	2	2	0.5	.	UCGAUAUUUUUGGGGCGAGAA	1	0	0	1	0	0	1	21	N
Fvb4:2108483-2108921	TE_homo_59351	Fvb4	2108483	2108921	439	187	70	0.701	.	AAUAUGAUGUCACCAAACUGA	79	5	0	90	17	16	59	21	N
Fvb4:3354918-3355086	TE_homo_60332	Fvb4	3354918	3355086	169	3	3	0.667	.	CCGGACGAACCAGACAGUGAGC	1	0	0	1	1	0	1	21	N
Fvb4:4296954-4297324	TE_homo_61019	Fvb4	4296954	4297324	371	295	87	0.546	.	AAACUGGAAUUCGACGGACUC	70	5	1	145	29	20	95	21	N
Fvb4:4530756-4530933	TE_homo_61160	Fvb4	4530756	4530933	178	254	49	0.173	-	UCUGCACUCCGGCUUAAAGUG	149	3	0	195	5	5	46	21	N
Fvb4:4530860-4531165	TE_homo_61161	Fvb4	4530860	4531165	306	228	61	0.25	.	UCUGCACUCCGGCUUAAAGUG	149	6	0	154	12	11	45	21	N
Fvb4:5028045-5028361	TE_homo_61513	Fvb4	5028045	5028361	317	3	3	0.667	.	AAACAAGAUUGAUCAAACACACUC	1	0	0	1	0	1	1	21	N
Fvb4:5663217-5663530	TE_homo_61982	Fvb4	5663217	5663530	314	1	1	1	+	AUUCACUCCCGGAGCUCCGAC	1	0	0	1	0	0	0	21	N
Fvb4:6530027-6530192	TE_homo_62699	Fvb4	6530027	6530192	166	2	2	1	+	AUUAGUUUAACUAGGGAUUUAGCA	1	0	0	1	0	0	1	21	N
Fvb4:9807263-9807572	TE_homo_65662	Fvb4	9807263	9807572	310	5	4	1	+	AAGCUCGUCUGUGGUGACUUUAGC	2	0	0	2	0	1	2	21	N
Fvb4:14221836-14222102	TE_homo_69999	Fvb4	14221836	14222102	267	1	1	0	-	UACAUAGAACUCACCAAAUGG	1	0	0	1	0	0	0	21	N
Fvb4:17651257-17651705	TE_homo_72292	Fvb4	17651257	17651705	449	126	47	0.802	+	UGAUUUGAUGAUCGUUAAGGC	37	2	1	63	8	9	43	21	N
Fvb4:17739475-17739909	TE_homo_72388	Fvb4	17739475	17739909	435	172	28	0.483	.	UAUGAAAUUUUGUAGAGGUGA	66	1	0	69	58	9	35	21	N
Fvb4:31482412-31482554	TE_homo_80511	Fvb4	31482412	31482554	143	4	4	1	+	CUAACACACUCAUUUUUGCUA	1	0	0	1	1	1	1	21	N
Fvb4:31791611-31791825	TE_homo_80618	Fvb4	31791611	31791825	215	2	2	0.5	.	AGCUUCAUCAUGUCAUACACACC	1	0	0	1	0	1	0	21	N
Fvb5:4439605-4440299	TE_struc_1970	Fvb5	4439605	4440299	695	6	4	1	+	AUUCAUUUAAAUCUAAAGGCU	3	1	0	4	0	1	0	21	N
Fvb5:4634961-4635219	TE_homo_83249	Fvb5	4634961	4635219	259	41	23	0.39	.	GAAACUGGAAUUCGGCGGACU	12	4	1	17	1	1	17	21	N
Fvb5:6264761-6265057	TE_homo_83941	Fvb5	6264761	6265057	297	134	66	0.284	.	ACUGGAAUUCGGUGGACUCGC	41	8	2	56	10	10	48	21	N
Fvb5:6991892-6992273	TE_struc_2005	Fvb5	6991892	6992273	382	62	40	0.629	.	UUUUGGGUAUGAUCAUAGGUA	11	7	1	35	12	4	3	21	N
Fvb5:7585605-7585740	TE_homo_84508	Fvb5	7585605	7585740	136	2	2	0	-	AAAACACUUUCUUGGUUGAAGGAA	1	0	0	1	0	0	1	21	N
Fvb5:10942155-10942337	TE_homo_86046	Fvb5	10942155	10942337	183	34	23	0.029	-	UUUGCAUCUAAGGGUGGCUGA	4	4	0	20	4	1	5	21	N
Fvb5:14956193-14956302	TE_homo_88549	Fvb5	14956193	14956302	110	57	11	0.825	+	UCAAAUUCCAGUUUUCCGGCG	40	1	2	44	0	0	10	21	N
Fvb5:19398455-19398654	TE_homo_91835	Fvb5	19398455	19398654	200	84	20	0.893	+	CCCAAUUGAUGAAAUUCUGUU	55	2	1	55	2	7	17	21	N
Fvb5:19831387-19831641	TE_homo_92174	Fvb5	19831387	19831641	255	51	21	0.784	.	AAACUGGAAAAUAAUGGACUC	24	0	0	24	0	4	23	21	N
Fvb5:23787342-23787424	TE_homo_95022	Fvb5	23787342	23787424	83	1	1	1	+	GGUGUUGCAUUCUUCGUUAUA	1	0	0	1	0	0	0	21	N
Fvb6:82648-83089	TE_homo_98719	Fvb6	82648	83089	442	47	15	0.085	-	UUGGUGAUCGUUAAGACUUUC	18	1	0	23	2	16	5	21	N
Fvb6:1678733-1678867	TE_homo_99294	Fvb6	1678733	1678867	135	3	3	1	+	GCUCUCCAUAUGUAAUUUAUACUC	1	0	0	2	0	0	1	21	N
Fvb6:2912131-2912420	TE_homo_99819	Fvb6	2912131	2912420	290	147	76	0.803	+	CAGCAGCGUCCCCGACU	13	26	1	52	21	7	40	21	N
Fvb6:3371292-3371559	TE_homo_100036	Fvb6	3371292	3371559	268	7797	759	0.947	+	UCCAUUCUCCGGCGUCGGCGA	2650	247	107	4128	1562	644	1109	21	N
Fvb6:3466834-3466947	TE_homo_100106	Fvb6	3466834	3466947	114	43	24	0.953	+	CAUGACGGGCUAUCAUCAUAGA	10	1	0	16	12	4	10	21	N
Fvb6:5949385-5949510	TE_homo_101372	Fvb6	5949385	5949510	126	166	46	0.06	-	UUGGCUGGUCACUGAUGGUCA	67	10	1	130	1	4	20	21	N
Fvb6:7275349-7275786	TE_homo_102053	Fvb6	7275349	7275786	438	40	17	0.825	+	AAUUUUUGAAAGUCUUAACGA	20	3	0	21	1	5	10	21	N
Fvb6:9391477-9391792	TE_homo_103324	Fvb6	9391477	9391792	316	115	54	0.687	.	AAAACUGGAAUUCGACGGACU	29	8	3	53	2	4	45	21	N
Fvb6:9637911-9638067	TE_homo_103455	Fvb6	9637911	9638067	157	2	2	0	-	CCGCGAAAAGUUCUGAAAACU	1	0	0	1	0	0	1	21	N
Fvb6:9718618-9718748	TE_struc_2554	Fvb6	9718618	9718748	131	70	30	0.386	.	UUAUGUCGAGAUGGCCAUCGG	14	0	1	51	11	4	3	21	N
Fvb6:15926129-15926303	TE_homo_107954	Fvb6	15926129	15926303	175	81	19	0.099	-	CCCGGACGACAGCACAGGCUU	45	1	0	57	1	8	14	21	N
Fvb6:21855077-21855253	TE_homo_112783	Fvb6	21855077	21855253	177	1	1	1	+	AAGAUACGUGACAUUUACCCA	1	0	0	1	0	0	0	21	N
Fvb6:22769765-22770114	TE_homo_113432	Fvb6	22769765	22770114	350	1	1	0	-	UGUUACGUAGAUGAGAUAUAC	1	0	0	1	0	0	0	21	N
Fvb6:23232891-23233330	TE_homo_113705	Fvb6	23232891	23233330	440	121	45	0.843	+	AACUUUUGAAAGUCUUAACGA	60	2	2	62	5	11	39	21	N
Fvb6:28814142-28814457	TE_homo_117486	Fvb6	28814142	28814457	316	441	68	0.986	+	ACGAAAUCGGAGUUGUUUUCC	174	65	3	346	13	4	10	21	N
Fvb6:32853021-32853309	TE_homo_119745	Fvb6	32853021	32853309	289	1	1	1	+	CUCGUCGAUCAGUUCUCUUUA	1	0	0	1	0	0	0	21	N
Fvb6:35779854-35780376	TE_homo_121076	Fvb6	35779854	35780376	523	1	1	1	+	CGUUUUUUAGAACCUUGCAUU	1	0	0	1	0	0	0	21	N
Fvb6:35814337-35814486	TE_homo_121081	Fvb6	35814337	35814486	150	1665	278	0.983	+	CACACUUGGUUGGAUAUAACACAG	304	92	22	639	391	101	420	21	N
Fvb6:35814497-35814646	TE_struc_2991	Fvb6	35814497	35814646	150	8	7	0.75	.	GUUAUAUCCAACCAAGGUUGGA	2	1	0	3	3	1	0	21	N
Fvb6:35814657-35814806	TE_homo_121082	Fvb6	35814657	35814806	150	1048	186	0.889	+	CUAUAAUCACUGCAGACCCUG	86	129	4	601	181	65	68	21	N
Fvb6:38253417-38253600	TE_homo_121959	Fvb6	38253417	38253600	184	33	7	0.303	.	CCCGGACGACAGCACAGGCUU	21	0	0	21	0	0	12	21	N
Fvb7:1063830-1064239	TE_homo_122949	Fvb7	1063830	1064239	410	1	1	0	-	ACAUAGAAUUUUGAGUUAGUU	1	0	0	1	0	0	0	21	N
Fvb7:3640560-3640850	TE_homo_124807	Fvb7	3640560	3640850	291	134	23	0.918	+	AAACUGGAAUUCGACGGACUC	73	2	0	79	14	20	19	21	N
Fvb7:7337733-7338024	TE_homo_127162	Fvb7	7337733	7338024	292	23	17	0.87	+	CGCUACUGGAGUGUUCUGGGG	6	0	0	12	3	2	6	21	N
Fvb7:8349249-8349689	TE_homo_127650	Fvb7	8349249	8349689	441	560	80	0.898	+	UUUGGUGAUCGUUAAGGCUUU	349	7	2	361	7	89	94	21	N
Fvb7:11144625-11144713	TE_homo_129283	Fvb7	11144625	11144713	89	2	1	0	-	UGAAUGGCUGGUCGCAGGAUC	2	0	0	2	0	0	0	21	N
Fvb7:11490697-11490795	TE_homo_129497	Fvb7	11490697	11490795	99	2	2	0	-	UUAGUCCUCAUAUUUCCGAUU	1	0	0	1	0	0	1	21	N
Fvb7:12766566-12766738	TE_homo_130162	Fvb7	12766566	12766738	173	3	3	0	-	UUGCUCGGUAUCAAUUGAAAU	1	0	0	1	1	0	1	21	N
Fvb7:15462110-15462444	TE_homo_131655	Fvb7	15462110	15462444	335	360	164	0.761	.	ACUUGAGGACAAAGUUGAUGCAUC	20	30	16	105	54	56	99	21	N
Fvb7:15582803-15583004	TE_homo_131761	Fvb7	15582803	15583004	202	7	6	0.714	.	UGGCUAAAAAUAGAAAGUGGGAGU	2	0	0	4	1	0	2	21	N
Fvb7:19297573-19297961	TE_homo_133221	Fvb7	19297573	19297961	389	9	8	0.444	.	UUGUGUGACUGGUGAAUCGCA	2	0	0	4	0	1	4	21	N
Fvb7:20116444-20116883	TE_homo_133493	Fvb7	20116444	20116883	440	978	56	0.691	.	AACUUUUGAAAGUCUUAACGA	589	4	1	656	10	43	264	21	N
Fvb7:20650210-20650656	TE_homo_133639	Fvb7	20650210	20650656	447	541	115	0.839	+	UAUGAAAUUUUGUAGAGGUGA	268	17	8	285	76	21	134	21	N
Fvb7:23512940-23513042	TE_homo_134615	Fvb7	23512940	23513042	103	5	5	0.4	.	CUGUCUGAGAUGUAACUACUCAGG	1	0	0	2	0	1	2	21	N
Fvb1:9490251-9490381	TE_homo_3896	Fvb1	9490251	9490381	131	4	3	1	+	AGCUAUGUGGUGGAUUUGGAGG	2	0	0	0	3	1	0	22	N
Fvb1:9626488-9626921	TE_homo_3968	Fvb1	9626488	9626921	434	2	2	0	-	UUUGAACCCUUCGGCCUAGCCCGG	1	0	0	0	1	0	1	22	N
Fvb1:10006507-10006668	TE_homo_4126	Fvb1	10006507	10006668	162	2	2	0.5	.	UGUCCCUUCUUGAUAAUCAACU	1	0	0	0	1	0	1	22	N
Fvb1:13885605-13886040	TE_homo_6589	Fvb1	13885605	13886040	436	244	79	0.865	+	CAUAUGAAAUUUUGUAGAGGUG	117	12	2	8	128	22	72	22	N
Fvb1:15959780-15959903	TE_homo_7950	Fvb1	15959780	15959903	124	2	2	1	+	UUUUUGGUCAACACAUUCACAA	1	0	0	0	1	0	1	22	N
Fvb1:16185190-16185460	TE_homo_8076	Fvb1	16185190	16185460	271	5	3	1	+	CGGACGUCUGCACUUUAAGCCA	2	0	0	0	3	0	2	22	N
Fvb1:20278302-20278463	TE_homo_11163	Fvb1	20278302	20278463	162	2	2	0.5	.	AAGUUAUGCCUGUUUUAGUGCGCA	1	0	0	0	1	0	1	22	N
Fvb1:20935714-20935900	TE_homo_11734	Fvb1	20935714	20935900	187	2	2	0.5	.	AAUUGGUUUUAUGAUUGUCUAU	1	0	0	0	1	1	0	22	N
Fvb1:22837330-22837597	TE_homo_13610	Fvb1	22837330	22837597	268	4	4	0.25	.	UGCUGGAGUCUUCUGGGGUGGA	1	0	0	0	2	1	1	22	N
Fvb2:738989-739363	TE_homo_15413	Fvb2	738989	739363	375	1	1	1	+	CUAUGAUUGAAUGAAAGCUGGG	1	0	0	0	1	0	0	22	N
Fvb2:3909441-3909625	TE_homo_17245	Fvb2	3909441	3909625	185	2	2	0	-	GCGGACAAUAUCGUGUUACGGCA	1	0	0	0	1	1	0	22	N
Fvb2:9947890-9948153	TE_homo_21725	Fvb2	9947890	9948153	264	11	8	0.182	-	CGCUGCUGGAGUCUUCUGGGGU	3	0	0	2	4	1	4	22	N
Fvb2:12195339-12195422	TE_homo_23423	Fvb2	12195339	12195422	84	2	2	0	-	AGUACAGAUUGGAUCAGAAGAGGA	1	0	0	0	1	0	1	22	N
Fvb2:21228857-21228956	TE_homo_28837	Fvb2	21228857	21228956	100	7	5	0.714	.	UAAUUGAAGGCAUCUCUAACAA	2	0	0	0	4	0	3	22	N
Fvb3:827404-827851	TE_homo_31923	Fvb3	827404	827851	448	290	42	0.841	+	UUUCAUAUGAUUUGGUGAUCGU	160	2	2	3	177	21	85	22	N
Fvb3:2397637-2397735	TE_homo_32651	Fvb3	2397637	2397735	99	10	9	0.5	.	CUUCUUCUUCUUUCUUCCUCUC	2	1	0	2	3	1	3	22	N
Fvb3:3286358-3286497	TE_homo_33059	Fvb3	3286358	3286497	140	1	1	1	+	UUUAACUAGACAACUUUGAGGU	1	0	0	0	1	0	0	22	N
Fvb3:9216592-9216671	TE_homo_36150	Fvb3	9216592	9216671	80	3	3	0.333	.	AAACGUAGGAAAUGAACAACUA	1	0	0	0	1	1	1	22	N
Fvb3:25545870-25545987	TE_homo_49005	Fvb3	25545870	25545987	118	2	2	0	-	CGUGCCCAUCCCUAAAAUCUAC	1	0	0	0	1	0	1	22	N
Fvb3:29276756-29277194	TE_homo_52280	Fvb3	29276756	29277194	439	117	24	0.214	.	UAAAUUGAACUUUUGAAAGCCU	54	0	0	2	59	4	52	22	N
Fvb4:3352525-3352920	TE_homo_60328	Fvb4	3352525	3352920	396	2	2	0	-	UCUGGAUGGGGAAGCUUCUGUC	1	0	0	0	1	1	0	22	N
Fvb4:3511360-3511523	TE_homo_60426	Fvb4	3511360	3511523	164	9	8	0.333	.	GAAUUUCGUUUAGGCUAAUUAG	2	0	1	0	3	2	3	22	N
Fvb4:6276336-6276459	TE_homo_62481	Fvb4	6276336	6276459	124	2	2	0.5	.	AGAGAUAAUUUUAAGGUUAAAGU	1	0	0	0	1	1	0	22	N
Fvb4:11383441-11383608	TE_homo_67197	Fvb4	11383441	11383608	168	4	3	0.25	.	GUUAAAAUAGAUAGGACGAACC	2	0	0	1	2	0	1	22	N
Fvb4:12504200-12504381	TE_homo_68234	Fvb4	12504200	12504381	182	1	1	1	+	UACGAGUCUAGUUUUCAGAACC	1	0	0	0	1	0	0	22	N
Fvb4:12968703-12968864	TE_homo_68756	Fvb4	12968703	12968864	162	1	1	0	-	UCAAACGAAGUUGACUGUCCCU	1	0	0	0	1	0	0	22	N
Fvb4:16122745-16122828	TE_homo_71230	Fvb4	16122745	16122828	84	2	2	0.5	.	CAACGUUCAAAUUUAUAAGGAU	1	0	0	0	1	0	1	22	N
Fvb4:17374595-17374804	TE_homo_72078	Fvb4	17374595	17374804	210	3	3	0.667	.	CUUUCUAGUAAUUGGUUAAGUGG	1	0	0	0	1	1	1	22	N
Fvb4:22487431-22487692	TE_homo_75993	Fvb4	22487431	22487692	262	4	4	0.5	.	AAUUUGUUUAGGUAUUCUGCUAGA	1	0	0	0	2	0	2	22	N
Fvb4:26466690-26466819	TE_homo_78336	Fvb4	26466690	26466819	130	2	2	0.5	.	UUUAGGUUUUAGUUUGGGUAGGAA	1	0	0	0	1	0	1	22	N
Fvb4:33589680-33589829	TE_homo_81291	Fvb4	33589680	33589829	150	2	2	0.5	.	CAGAAAUAAAAGGUAGGGUAGC	1	0	0	0	1	1	0	22	N
Fvb4:33589734-33589847	TE_homo_81292	Fvb4	33589734	33589847	114	2	2	0.5	.	CAGAAAUAAAAGGUAGGGUAGC	1	0	0	0	1	1	0	22	N
Fvb5:4329380-4329765	TE_struc_1969	Fvb5	4329380	4329765	386	2	1	1	+	CAGCGGCGGAUCUAGGAUUUGC	2	0	0	0	2	0	0	22	N
Fvb5:12906663-12906806	TE_homo_87277	Fvb5	12906663	12906806	144	12	11	0.667	.	AAGACUUAAAAACUGAGUUACU	2	2	0	1	3	3	3	22	N
Fvb5:13692113-13692223	TE_homo_87777	Fvb5	13692113	13692223	111	2	2	1	+	GAAAGUGGGAGUAUAGAUUAUAAU	1	0	0	0	1	0	1	22	N
Fvb5:23177139-23177239	TE_homo_94651	Fvb5	23177139	23177239	101	2	2	1	+	AACAUCUACUCGUGCAAAUUUG	1	0	0	0	1	1	0	22	N
Fvb5:25150282-25150476	TE_homo_95861	Fvb5	25150282	25150476	195	3	3	0.667	.	UUCUCUUCAUGACUCUAAGACU	1	0	0	0	1	1	1	22	N
Fvb6:6405634-6405903	TE_homo_101627	Fvb6	6405634	6405903	270	2	2	0.5	.	AAUGUUUUUUUUGUGAUAUAAACU	1	0	0	0	1	0	1	22	N
Fvb6:18367476-18367743	TE_homo_109919	Fvb6	18367476	18367743	268	44	20	0.795	.	AAACUGGAAUUCGGCGGACUCG	17	0	0	7	19	2	16	22	N
Fvb6:21488562-21488685	TE_homo_112461	Fvb6	21488562	21488685	124	6	6	0.5	.	AAGUAAACAAAUGAAUGAGAAUCA	1	0	0	0	2	2	2	22	N
Fvb6:26263002-26263266	TE_homo_115832	Fvb6	26263002	26263266	265	2	2	0	-	GAAAAAAAAUCUCUUCGGCUAU	1	0	0	0	1	0	1	22	N
Fvb6:27252851-27252942	TE_homo_116520	Fvb6	27252851	27252942	92	1	1	1	+	UUUAUUUUUUGAUGUGGGAUUU	1	0	0	0	1	0	0	22	N
Fvb6:30157505-30157626	TE_homo_118252	Fvb6	30157505	30157626	122	2	2	1	+	UCUAUUUUCAUUAAUGCAUACU	1	0	0	0	1	0	1	22	N
Fvb6:32008627-32008758	TE_homo_119337	Fvb6	32008627	32008758	132	2	2	0	-	GAGAAUUGAAAUUUGUUUAGUCGU	1	0	0	0	1	0	1	22	N
Fvb6:33382869-33383008	TE_homo_119991	Fvb6	33382869	33383008	140	2	2	0.5	.	AAUGAAACCUAGGGUAGCAAAUU	1	0	0	0	1	1	0	22	N
Fvb6:34784784-34785195	TE_homo_120690	Fvb6	34784784	34785195	412	12	9	0.5	.	UGAUUUGGUGAUCGUUAAGACU	3	1	0	0	4	3	4	22	N
Fvb7:3250722-3251014	TE_homo_124487	Fvb7	3250722	3251014	293	4	4	0.25	.	UUACCCCAGAUCUAGCCGCAAG	1	0	0	1	2	0	1	22	N
Fvb7:5367435-5367609	TE_homo_125997	Fvb7	5367435	5367609	175	6	5	0.167	-	GGUAGAUUCUAGGGUGAUUGAGC	2	0	0	0	4	2	0	22	N
Fvb7:7243649-7243810	TE_homo_127124	Fvb7	7243649	7243810	162	1	1	1	+	CUUCAUCGUUAAAAUAGAUAUG	1	0	0	0	1	0	0	22	N
Fvb7:22992646-22992844	TE_homo_134384	Fvb7	22992646	22992844	199	6	6	0.833	+	ACUGGUCCGUGUUGUAGUGAUU	1	0	0	1	2	1	2	22	N
Fvb1:1669639-1669794	TE_homo_563	Fvb1	1669639	1669794	156	1	1	1	+	UAGUAUUAUUCAUGAUUCGAAUA	1	0	0	0	0	1	0	23	N
Fvb1:1893187-1893415	TE_homo_624	Fvb1	1893187	1893415	229	1	1	1	+	CUGAGACAAUAUAAUUUAGGGUU	1	0	0	0	0	1	0	23	N
Fvb1:5491312-5491590	TE_homo_2025	Fvb1	5491312	5491590	279	6	5	0.667	.	AAGAGAUGUAUCAGAUGUUGCCU	2	0	0	1	0	5	0	23	N
Fvb1:5823276-5823471	TE_homo_2163	Fvb1	5823276	5823471	196	2	2	0	-	UUGGGCAGAAUGUUAGGACAGAG	1	0	0	0	0	1	1	23	N
Fvb1:7799844-7800265	TE_homo_2956	Fvb1	7799844	7800265	422	20	9	0.05	-	CCGGACCCGUAUAUAUAUAUACA	9	0	0	1	0	12	7	23	N
Fvb1:8058541-8058709	TE_homo_3078	Fvb1	8058541	8058709	169	4	4	0.25	.	UGGACAGUCAACUUCGUUUGAGCU	1	0	0	0	0	2	2	23	N
Fvb1:11111932-11112072	TE_homo_4696	Fvb1	11111932	11112072	141	1	1	0	-	AGAAGAACUAAGAGCACCCAAGA	1	0	0	0	0	1	0	23	N
Fvb1:11218095-11218180	TE_homo_4746	Fvb1	11218095	11218180	86	5	4	0.2	.	ACAAAAUUUAAGUCAUUAAAAGA	2	0	0	1	0	2	2	23	N
Fvb1:11555635-11555794	TE_homo_4983	Fvb1	11555635	11555794	160	1	1	0	-	UCUGAAAACUAGACUCGUAGAGC	1	0	0	0	0	1	0	23	N
Fvb1:13022716-13022867	TE_homo_5987	Fvb1	13022716	13022867	152	10	7	0.1	-	ACGGAAUUUUAACAAUUGGGCUU	4	0	1	1	1	4	3	23	N
Fvb1:14974799-14975101	TE_homo_7317	Fvb1	14974799	14975101	303	7	6	0.286	.	UGUUCAUUUCCUGCGUAGGGAUG	2	0	0	1	0	3	3	23	N
Fvb1:16759332-16759589	TE_homo_8451	Fvb1	16759332	16759589	258	5	5	0.6	.	CAUCCACCCCAUAACACUCCCCGA	1	1	0	0	0	2	2	23	N
Fvb1:17848557-17848709	TE_homo_9139	Fvb1	17848557	17848709	153	2	2	1	+	GGAAUGGUAUCUAGGCUGUAGCCC	1	0	0	0	0	1	1	23	N
Fvb1:18353046-18353414	TE_homo_9532	Fvb1	18353046	18353414	369	339	83	0.77	.	CCGACGACGGCGCUCCUCCACCC	197	4	6	17	7	209	96	23	N
Fvb1:18612937-18613059	TE_homo_9768	Fvb1	18612937	18613059	123	2	2	0.5	.	AAUUAACCAACCAAGCCACGGCUC	1	0	0	0	0	1	1	23	N
Fvb1:19079997-19080102	TE_homo_10107	Fvb1	19079997	19080102	106	15	15	0.667	.	AAUUUCACUACAAAAGACU	1	2	1	0	0	6	6	23	N
Fvb1:20961638-20961836	TE_homo_11762	Fvb1	20961638	20961836	199	3	3	0.333	.	AGAAAAAUUGUAUCCUUUUGCCA	1	0	0	0	0	3	0	23	N
Fvb1:22010718-22010821	TE_homo_12771	Fvb1	22010718	22010821	104	1	1	1	+	AAGUAUUUAAAUGUCGUUGGCUC	1	0	0	0	0	1	0	23	N
Fvb1:23994776-23995129	TE_struc_330	Fvb1	23994776	23995129	354	2	2	0	-	CAUGACUGGGGCCAAAUUCGAUU	1	0	0	0	0	1	1	23	N
Fvb1:24015477-24015645	TE_homo_14665	Fvb1	24015477	24015645	169	6	3	0.333	.	GUUCUAAAAAACGCUAGGCGCUG	4	0	0	0	0	4	2	23	N
Fvb2:1499477-1499890	TE_struc_381	Fvb2	1499477	1499890	414	2749	348	0.286	.	UAGACAUGUAGAUUUUCUUCACA	919	41	47	41	283	1175	1162	23	N
Fvb2:3201751-3201860	TE_homo_16776	Fvb2	3201751	3201860	110	4	4	0.5	.	UUUCGGUAACUUAAAUUUUGUCA	1	0	0	0	0	2	2	23	N
Fvb2:4968097-4968469	TE_homo_17991	Fvb2	4968097	4968469	373	8	6	0.625	.	CAUAAACCGAAAAGUCCUCAACA	3	0	0	0	0	4	4	23	N
Fvb2:6451444-6451665	TE_homo_19005	Fvb2	6451444	6451665	222	2	2	0	-	UGACAUGUUUCGUUGGCUAAAUA	1	0	0	0	0	1	1	23	N
Fvb2:6805998-6806166	TE_homo_19344	Fvb2	6805998	6806166	169	6	5	0.833	+	AAUCGUGAAAAGUUCUGAAAACU	2	0	0	0	0	3	3	23	N
Fvb2:7215345-7215434	TE_homo_19687	Fvb2	7215345	7215434	90	10	9	0.8	+	CGUAUCUCUGCUGUAAUAAAACC	2	1	0	0	0	6	3	23	N
Fvb2:8037114-8037238	TE_homo_20359	Fvb2	8037114	8037238	125	2	2	1	+	CAUAUGUCUGUGAGGCUUGAACC	1	0	0	0	0	1	1	23	N
Fvb2:9483122-9483296	TE_homo_21393	Fvb2	9483122	9483296	175	2	2	0.5	.	AAUAUUCUACAAGUACUAGGACC	1	0	0	0	0	1	1	23	N
Fvb2:10789405-10789762	TE_homo_22358	Fvb2	10789405	10789762	358	1	1	1	+	CUUUGGAACGUUCUGCCCUAGAA	1	0	0	0	0	1	0	23	N
Fvb2:11227016-11227188	TE_struc_537	Fvb2	11227016	11227188	173	2	2	1	+	AGGCGGGGAUUUUUAGAACAUUGG	1	0	0	0	0	1	1	23	N
Fvb2:11332103-11332238	TE_homo_22800	Fvb2	11332103	11332238	136	4	4	0.5	.	UUAUUUUAUGAAUGUGUUAACCA	1	0	0	0	1	2	1	23	N
Fvb2:12080246-12080398	TE_homo_23279	Fvb2	12080246	12080398	153	2	2	0.5	.	AGCUAGGGUAGCAAAUUGACACC	1	0	0	0	0	1	1	23	N
Fvb2:12248922-12249264	TE_homo_23484	Fvb2	12248922	12249264	343	19	10	0.789	.	AGGGCCCUGUAUAUAUAUAUAUA	8	1	0	2	2	10	4	23	N
Fvb2:13223092-13223296	TE_homo_24262	Fvb2	13223092	13223296	205	7	6	0.714	.	GACAAAAUUAAUAUUUCGUCGGCU	2	0	0	1	0	3	3	23	N
Fvb2:14484763-14485419	TE_struc_596	Fvb2	14484763	14485419	657	21	10	0.143	-	UUAUCUAAUUACGGGUACGGGGA	12	0	0	0	1	13	7	23	N
Fvb2:16281994-16282161	TE_homo_26241	Fvb2	16281994	16282161	168	6	6	0.167	-	AUAAUCGGUAAAUCAUAUUUGUC	1	0	0	0	0	3	3	23	N
Fvb2:18345064-18345174	TE_homo_27424	Fvb2	18345064	18345174	111	1	1	0	-	UUUAUAAUUGUGUUAACUAAAAG	1	0	0	0	0	1	0	23	N
Fvb2:20127578-20127740	TE_homo_28453	Fvb2	20127578	20127740	163	4	4	0.5	.	ACUAACUUCAUUUGAGCAUUGUGA	1	0	0	0	0	2	2	23	N
Fvb2:20529476-20529989	TE_struc_670	Fvb2	20529476	20529989	514	33	22	0.788	.	GGAGAUGCCCUUAGAGUUGGAUU	11	2	0	0	0	16	15	23	N
Fvb2:21078615-21078854	TE_homo_28804	Fvb2	21078615	21078854	240	12	10	0.5	.	GAGGACUAAUGUUGUACGUAAUU	2	0	2	0	0	7	3	23	N
Fvb2:21925184-21925385	TE_homo_29104	Fvb2	21925184	21925385	202	4	4	0.75	.	AUCGUGUUCCUGUGCAUUGGGUA	1	0	0	1	0	2	1	23	N
Fvb2:22842558-22842711	TE_homo_29406	Fvb2	22842558	22842711	154	1	1	1	+	UCCAUUGUCUCUGCUGUGCAAGG	1	0	0	0	0	1	0	23	N
Fvb2:25395044-25395231	TE_homo_30482	Fvb2	25395044	25395231	188	2	2	0.5	.	AACUGCCAUUACUCUCUCCAGGA	1	0	0	0	0	1	1	23	N
Fvb3:2119351-2119448	TE_homo_32511	Fvb3	2119351	2119448	98	2	2	0	-	UGAACCAGUAGCAAUUAGAUGAU	1	0	0	0	0	1	1	23	N
Fvb3:2465411-2465518	TE_homo_32719	Fvb3	2465411	2465518	108	10	8	0	-	UUGACAUAAGCCACAUCAGCCCU	2	0	0	0	0	5	5	23	N
Fvb3:3560780-3560942	TE_homo_33199	Fvb3	3560780	3560942	163	2	2	0	-	AAGAGGAAUUGAGAAAUAGAGGC	1	0	0	0	0	1	1	23	N
Fvb3:3875301-3875429	TE_homo_33359	Fvb3	3875301	3875429	129	2	2	0	-	CAUCUCAGACAGAAUGCAAAAGA	1	0	0	0	0	1	1	23	N
Fvb3:5182804-5182886	TE_homo_33968	Fvb3	5182804	5182886	83	58	30	0.655	.	AAUGAAGUUUGAACACAUGACCU	16	5	2	1	6	23	21	23	N
Fvb3:5671995-5672157	TE_homo_34264	Fvb3	5671995	5672157	163	2	2	0	-	CGAUUGUGCCCUCACUUACUACAU	1	0	0	0	0	1	1	23	N
Fvb3:6310158-6310454	TE_homo_34607	Fvb3	6310158	6310454	297	1	1	0	-	UAAAAGCUAGUGUACUUUAAGAA	1	0	0	0	0	1	0	23	N
Fvb3:7691446-7691995	TE_struc_899	Fvb3	7691446	7691995	550	9	8	0.889	+	UGGGCAUGUAACGGGCCGGGCCA	2	1	0	0	0	4	4	23	N
Fvb3:8115808-8115965	TE_homo_35425	Fvb3	8115808	8115965	158	2	2	1	+	UGUUGAGAGGAAGAUUCUGUAAAA	1	0	0	0	0	1	1	23	N
Fvb3:8523762-8523882	TE_homo_35622	Fvb3	8523762	8523882	121	5	5	0.2	.	CGAACUAAACAAGAACUAAUGGG	1	0	0	0	1	2	2	23	N
Fvb3:9823813-9824351	TE_homo_36495	Fvb3	9823813	9824351	539	13	12	0.154	-	UUUUUUGAGAAGAUAGAGAACCU	2	0	0	1	0	6	6	23	N
Fvb3:10935000-10935086	TE_homo_37198	Fvb3	10935000	10935086	87	2	2	1	+	AUUAAAAAUGAGGGGAUAAAACU	1	0	0	0	0	1	1	23	N
Fvb3:10968934-10969215	TE_homo_37233	Fvb3	10968934	10969215	282	6	5	0.5	.	AACAAAUAAAAACAAGGAACAUU	2	0	0	0	0	3	3	23	N
Fvb3:11087313-11087474	TE_homo_37333	Fvb3	11087313	11087474	162	1	1	1	+	ACUUCGUUUGAGCUUUGUGAACA	1	0	0	0	0	1	0	23	N
Fvb3:12158898-12159125	TE_homo_37925	Fvb3	12158898	12159125	228	5	4	1	+	AGGGCCCUGUAUAUAUAUAUAUA	2	0	0	0	0	3	2	23	N
Fvb3:12554906-12555020	TE_homo_38219	Fvb3	12554906	12555020	115	2	2	0	-	UUUUGAGGGAUUUUCAUAUACACC	1	0	0	0	0	1	1	23	N
Fvb3:14493665-14493968	TE_homo_39593	Fvb3	14493665	14493968	304	1	1	0	-	UUUGAGAAUAACUAAAUUGAGAA	1	0	0	0	0	1	0	23	N
Fvb3:15695212-15695594	TE_homo_40472	Fvb3	15695212	15695594	383	14	3	0.071	-	UUAUCUAAUUACGGGUACGGGGA	12	0	0	0	0	13	1	23	N
Fvb3:15751176-15751365	TE_homo_40495	Fvb3	15751176	15751365	190	8	8	0.5	.	UUUAGGGUAGAUUUAUAAGUGUAU	1	0	0	0	2	4	2	23	N
Fvb3:17188236-17188562	TE_homo_41616	Fvb3	17188236	17188562	327	7	6	1	+	UAAUUUUGAUUUUAUAACUCACU	2	0	0	0	0	4	3	23	N
Fvb3:19637860-19638314	TE_homo_43791	Fvb3	19637860	19638314	455	2	2	0	-	CUUUCGGCCACCUCCAAUCAGGAC	1	0	0	0	0	1	1	23	N
Fvb3:20801658-20801819	TE_homo_44887	Fvb3	20801658	20801819	162	1	1	1	+	UUAAAUUUAGUGAAAAAUUACCU	1	0	0	0	0	1	0	23	N
Fvb3:21068790-21068958	TE_homo_45154	Fvb3	21068790	21068958	169	1	1	1	+	UGCUAACGGAGAUCGGGACAGAU	1	0	0	0	0	1	0	23	N
Fvb3:21163004-21163222	TE_homo_45223	Fvb3	21163004	21163222	219	5	4	0.8	+	GAAGGGGACUGUAUAUAUAUAUA	2	0	0	1	0	2	2	23	N
Fvb3:22820408-22820506	TE_homo_46585	Fvb3	22820408	22820506	99	22	14	0.409	.	GAGACUUUAGCCGACGAUGAUAUU	4	1	1	0	2	9	9	23	N
Fvb3:22942496-22942580	TE_homo_46712	Fvb3	22942496	22942580	85	2	2	0	-	GAGGUGUAUUGUUUUGAAAACUG	1	0	0	0	0	2	0	23	N
Fvb3:23558800-23558893	TE_homo_47223	Fvb3	23558800	23558893	94	2	2	1	+	AGUUAAAUCGCAUAGUCCGAAGAA	1	0	0	0	0	1	1	23	N
Fvb3:27181168-27181332	TE_homo_50507	Fvb3	27181168	27181332	165	2	2	1	+	AGACUCGUAGAGCUUUCCAAUGAU	1	0	0	0	0	1	1	23	N
Fvb3:27740458-27740647	TE_homo_51083	Fvb3	27740458	27740647	190	17	14	0.353	.	CAUGGAUAUGAAAGCAAGUAACA	4	1	1	2	0	8	5	23	N
Fvb3:28051389-28051749	TE_homo_51306	Fvb3	28051389	28051749	361	71	23	0.099	-	GGGAAUGUAGUACUAAUCAAACU	34	0	2	3	0	36	30	23	N
Fvb3:28679505-28679752	TE_homo_51815	Fvb3	28679505	28679752	248	15	11	0.133	-	ACCCCAGAACACUCCAGCAGCCU	4	1	0	2	0	6	6	23	N
Fvb3:28686310-28686431	TE_homo_51827	Fvb3	28686310	28686431	122	1	1	1	+	UCCAUCUAAGUAACUAUGCAAGU	1	0	0	0	0	1	0	23	N
Fvb3:28694571-28694685	TE_homo_51847	Fvb3	28694571	28694685	115	2	2	0.5	.	UUUUAAAAAACCAGCAACUUUAGC	1	0	0	0	0	1	1	23	N
Fvb3:28707711-28707976	TE_homo_51862	Fvb3	28707711	28707976	266	15	13	0.667	.	UCUAAACUCUAAACUCUAAACCCU	2	1	2	0	2	5	5	23	N
Fvb3:28862472-28862584	TE_homo_51977	Fvb3	28862472	28862584	113	9	8	0.333	.	UAUUUGUUUUGUAGGUACCUUCU	2	1	0	0	0	6	2	23	N
Fvb3:29171982-29172080	TE_homo_52218	Fvb3	29171982	29172080	99	17	12	0.412	.	AGUGGUAAUACUGAGUCGUAUUA	5	2	1	0	1	9	4	23	N
Fvb3:34549660-34549793	TE_homo_55881	Fvb3	34549660	34549793	134	1	1	1	+	AAUGGUUCCAUAGAUGCUUGCCU	1	0	0	0	0	1	0	23	N
Fvb3:34631073-34631154	TE_homo_55915	Fvb3	34631073	34631154	82	3	2	0	-	ACGAGAUAUUACAAUAGUGGAUG	2	0	0	0	1	2	0	23	N
Fvb4:952160-952342	TE_homo_58634	Fvb4	952160	952342	183	1	1	1	+	AAAUAUCGUAACACAGAGGAAGA	1	0	0	0	0	1	0	23	N
Fvb4:1853763-1853892	TE_homo_59204	Fvb4	1853763	1853892	130	2	2	0.5	.	GAUGUUUCGUCUAUCUAUUUACU	1	0	0	0	0	1	1	23	N
Fvb4:3112259-3112524	TE_homo_60162	Fvb4	3112259	3112524	266	3	3	0.333	.	CCAAUGGUUGUCAGUAACAAAUU	1	0	0	0	0	2	1	23	N
Fvb4:3113355-3113562	TE_homo_60165	Fvb4	3113355	3113562	208	2	2	0.5	.	CCACCGUAAACUAAAUCUUAAGCU	1	0	0	0	0	1	1	23	N
Fvb4:3297130-3297506	TE_homo_60270	Fvb4	3297130	3297506	377	2	2	0	-	AAAAAUUGAAGCUUGAAUUAAGGA	1	0	0	0	0	1	1	23	N
Fvb4:4435199-4435574	TE_homo_61111	Fvb4	4435199	4435574	376	3	3	1	+	UUCAUGUGAUGAUCGAUAGAAAU	1	0	0	0	0	2	1	23	N
Fvb4:5026069-5026251	TE_homo_61508	Fvb4	5026069	5026251	183	1	1	1	+	AUAUGGACAAACCGUGAAAAGUU	1	0	0	0	0	1	0	23	N
Fvb4:5826409-5826514	TE_homo_62078	Fvb4	5826409	5826514	106	5	5	0.8	+	UUAAAUAUAGUCGACUAAAGUUA	1	0	0	0	0	3	2	23	N
Fvb4:6377556-6377799	TE_homo_62567	Fvb4	6377556	6377799	244	8	7	0.625	.	AGUCUCCGAACCGGCCGCCGGAA	2	0	0	1	0	4	3	23	N
Fvb4:6525070-6525245	TE_homo_62696	Fvb4	6525070	6525245	176	4	4	1	+	UAUAGAAGCAAUAAAGCAGCGAGC	1	0	0	0	0	2	2	23	N
Fvb4:7878350-7878518	TE_homo_63758	Fvb4	7878350	7878518	169	2	2	1	+	CCAUUCUGGACAGUCAACUUCAA	1	0	0	0	0	1	1	23	N
Fvb4:7905246-7905400	TE_homo_63783	Fvb4	7905246	7905400	155	7	7	0.571	.	AUAACACCACCCUAUAUAUAAAG	1	1	0	0	0	3	3	23	N
Fvb4:8630193-8630352	TE_homo_64469	Fvb4	8630193	8630352	160	6	6	0.167	-	GUUGUCCGGAGCUGUUCACAAAGC	1	1	0	0	1	2	2	23	N
Fvb4:8962399-8962552	TE_homo_64834	Fvb4	8962399	8962552	154	11	10	0.636	.	CAAGAUGAUCUGGAAACUAAAUU	2	1	0	0	1	5	4	23	N
Fvb4:9513590-9513796	TE_homo_65340	Fvb4	9513590	9513796	207	1	1	1	+	CCUCACACACACCGAAUCGAGCU	1	0	0	0	0	1	0	23	N
Fvb4:10297500-10297616	TE_homo_66138	Fvb4	10297500	10297616	117	3	2	0.667	.	CAUGCUUAACCUCGGAGUACCCG	2	0	0	0	0	2	1	23	N
Fvb4:12602341-12602457	TE_homo_68359	Fvb4	12602341	12602457	117	3	3	0.667	.	GAUAGAGGUCAUAAACGAUGUUU	1	0	0	0	0	2	1	23	N
Fvb4:12749033-12749194	TE_homo_68537	Fvb4	12749033	12749194	162	1	1	0	-	AUGUGAACAGAUCCGGACGAACC	1	0	0	0	0	1	0	23	N
Fvb4:12980066-12980264	TE_struc_1598	Fvb4	12980066	12980264	199	2	2	0.5	.	UUGGUAUUACACGACUACUCAUCU	1	0	0	0	0	1	1	23	N
Fvb4:13089261-13089517	TE_homo_68858	Fvb4	13089261	13089517	257	1	1	1	+	GUUAGCAUAGUGAAUAUGUCAUA	1	0	0	0	0	1	0	23	N
Fvb4:14186274-14186442	TE_homo_69944	Fvb4	14186274	14186442	169	1	1	1	+	CAAAGGUCAUUCUACGCGGAAAU	1	0	0	0	0	1	0	23	N
Fvb4:15714182-15714565	TE_homo_71013	Fvb4	15714182	15714565	384	8	4	0.125	-	UUAUCUAAUUACGGGUACGGGGA	5	0	0	0	0	5	3	23	N
Fvb4:16379856-16380265	TE_homo_71398	Fvb4	16379856	16380265	410	2	2	0.5	.	AGUGGAAACUCUUGUGUUUUAGGC	1	0	0	0	0	1	1	23	N
Fvb4:16472874-16472965	TE_homo_71479	Fvb4	16472874	16472965	92	1	1	1	+	AAAAUUUAAGUUACAAAAAUGGA	1	0	0	0	0	1	0	23	N
Fvb4:16770635-16771143	TE_homo_71654	Fvb4	16770635	16771143	509	2	2	1	+	AUGUACAGGUGAGAAAAUAGUAGU	1	0	0	0	0	1	1	23	N
Fvb4:16986612-16986712	TE_homo_71828	Fvb4	16986612	16986712	101	2	2	1	+	UACUCAAUCUACUACUCUAUGUU	1	0	0	0	0	1	1	23	N
Fvb4:19793619-19793780	TE_homo_73975	Fvb4	19793619	19793780	162	2	2	1	+	UGUGAACAGCUCCGGACGAACCU	1	0	0	0	0	2	0	23	N
Fvb4:20658476-20658558	TE_homo_74765	Fvb4	20658476	20658558	83	2	2	1	+	UAAAAUACUUGUGUCUAUACUAG	1	0	0	0	0	1	1	23	N
Fvb4:21181958-21182137	TE_homo_75066	Fvb4	21181958	21182137	180	2	2	1	+	AACGCAUAGUCCAAAUAGAACUUG	1	0	0	0	0	1	1	23	N
Fvb4:21319366-21319489	TE_homo_75198	Fvb4	21319366	21319489	124	1	1	0	-	GUGUGUGUUCUAGUUCUGUCAUU	1	0	0	0	0	1	0	23	N
Fvb4:21389112-21389273	TE_homo_75254	Fvb4	21389112	21389273	162	1	1	1	+	AACCGUGAAAAGUUCUGAAAACU	1	0	0	0	0	1	0	23	N
Fvb4:22125220-22125384	TE_homo_75744	Fvb4	22125220	22125384	165	4	3	0	-	CAGAGAUGGAAGAUAGUGCAACU	2	0	0	0	1	2	1	23	N
Fvb4:23121137-23121303	TE_homo_76436	Fvb4	23121137	23121303	167	2	2	0.5	.	CAGACAGUGAGCAUUAUAUCAUU	1	0	0	0	0	1	1	23	N
Fvb4:26212303-26212735	TE_homo_78233	Fvb4	26212303	26212735	433	2	2	0.5	.	CAAACUUUUGUAGAAAAUCUUCA	1	0	0	0	0	1	1	23	N
Fvb4:26888374-26888532	TE_homo_78607	Fvb4	26888374	26888532	159	5	5	0.4	.	AAGAAGUUAUGGCUAUUCUAG	1	0	0	1	0	2	2	23	N
Fvb4:28099101-28099223	TE_homo_79087	Fvb4	28099101	28099223	123	2	2	0.5	.	ACGAAAAUUCAGUAAUUAGGCAUG	1	0	0	0	0	1	1	23	N
Fvb4:32324577-32324707	TE_homo_80810	Fvb4	32324577	32324707	131	2	2	0.5	.	UCAUGUUUUUGUAUGUUGGCAUC	1	0	0	0	0	1	1	23	N
Fvb4:33589485-33589775	TE_homo_81290	Fvb4	33589485	33589775	291	1	1	1	+	AUUCCUCCGUCUAAACAUUGAUG	1	0	0	0	0	1	0	23	N
Fvb5:76219-76569	TE_homo_81484	Fvb5	76219	76569	351	1614	265	0.728	.	CCGACGACGGCGCUCCUCCACCC	702	64	3	97	61	765	624	23	N
Fvb5:877148-877245	TE_homo_81684	Fvb5	877148	877245	98	51	28	0.902	+	UUAGAGAAUAAGACGUGAAAACU	19	2	1	5	4	24	15	23	N
Fvb5:4239169-4239552	TE_homo_83084	Fvb5	4239169	4239552	384	4	3	0.75	.	GUUGGAGAUGCCCUUAUGACUUG	2	0	0	0	0	2	2	23	N
Fvb5:4546823-4546905	TE_homo_83211	Fvb5	4546823	4546905	83	6	6	0.167	-	AAACAAUGUUCUUAGGAAAAU	1	0	1	1	0	2	2	23	N
Fvb5:4947064-4947262	TE_homo_83381	Fvb5	4947064	4947262	199	3	2	1	+	AACAACUUUCACUUGCUUAUGUU	2	0	0	0	0	2	1	23	N
Fvb5:5192097-5192211	TE_homo_83548	Fvb5	5192097	5192211	115	1	1	1	+	ACUGUAGAAACUUUCAGCCACCU	1	0	0	0	0	1	0	23	N
Fvb5:8730684-8730775	TE_homo_84932	Fvb5	8730684	8730775	92	1	1	0	-	ACAUCGGAAUAGAAAGUUCUUUC	1	0	0	0	0	1	0	23	N
Fvb5:11743563-11743684	TE_homo_86583	Fvb5	11743563	11743684	122	81	14	0.926	+	AAGAAGGACUAACAUGAUGAUCA	26	0	13	1	14	27	26	23	N
Fvb5:12018245-12018344	TE_homo_86774	Fvb5	12018245	12018344	100	2	2	0.5	.	AACCCACAAUCCAACUUGACCUC	1	0	0	0	0	1	1	23	N
Fvb5:13700151-13700288	TE_homo_87781	Fvb5	13700151	13700288	138	1	1	1	+	AAUGAGAGUGUAGAUUUUAAUUA	1	0	0	0	0	1	0	23	N
Fvb5:16413234-16413606	TE_homo_89646	Fvb5	16413234	16413606	373	1	1	0	-	UUGAGAGAACGAAGAUUGAAAUU	1	0	0	0	0	1	0	23	N
Fvb5:17865450-17865793	TE_homo_90815	Fvb5	17865450	17865793	344	2	2	1	+	AAUUAGUCUUUGGUCUUUGGAUU	1	0	0	0	0	1	1	23	N
Fvb5:18059919-18060013	TE_homo_90935	Fvb5	18059919	18060013	95	2	2	1	+	AAGGUUUAGCCGGUUAUAGUCUA	1	0	0	0	0	1	1	23	N
Fvb5:18416875-18417152	TE_homo_91181	Fvb5	18416875	18417152	278	1	1	1	+	UAUAAAUGAAUAAUGUUGGGACU	1	0	0	0	0	1	0	23	N
Fvb5:18622683-18622791	TE_homo_91308	Fvb5	18622683	18622791	109	3	3	0.333	.	AUAGGAGAGCAUUCUGAUGCACA	1	0	0	0	0	2	1	23	N
Fvb5:19076109-19076463	TE_homo_91608	Fvb5	19076109	19076463	355	39	15	0.769	.	CCGACGACGGCGCUCCUCCACCC	25	1	1	5	0	26	6	23	N
Fvb5:19691961-19692044	TE_homo_92047	Fvb5	19691961	19692044	84	2	2	0	-	UCUCUCUUGGAACGUCGGAAUUGC	1	0	0	0	0	1	1	23	N
Fvb5:19837421-19837577	TE_homo_92189	Fvb5	19837421	19837577	157	10	7	0.7	.	CAACGAGGACUAAUAUUACUACU	2	0	0	2	0	4	4	23	N
Fvb5:19900977-19901233	TE_homo_92224	Fvb5	19900977	19901233	257	8	6	0.125	-	UAGAAAAGAACGGACUCGCCAGG	2	0	0	0	2	4	2	23	N
Fvb5:20090888-20091331	TE_homo_92357	Fvb5	20090888	20091331	444	2	2	0	-	CAGCUUAUGUCAAACUAAAACCA	1	0	0	0	0	2	0	23	N
Fvb5:20495239-20495462	TE_homo_92669	Fvb5	20495239	20495462	224	1	1	1	+	AGUUUAUCAAAUUUGAUGGAAGA	1	0	0	0	0	1	0	23	N
Fvb5:21302347-21302519	TE_homo_93328	Fvb5	21302347	21302519	173	15	13	0.467	.	GAAUUCAGGAUUGGGAUAUAGACU	3	1	0	0	0	7	7	23	N
Fvb5:21467703-21467810	TE_homo_93429	Fvb5	21467703	21467810	108	22	11	0.682	.	UAUGUCCGUGAGGUUUGAACCCA	8	0	0	0	0	11	11	23	N
Fvb5:22806559-22806902	TE_homo_94413	Fvb5	22806559	22806902	344	5	4	0.4	.	UUUUAGGGAUAGAUCAUUUGACA	2	0	1	0	0	3	1	23	N
Fvb5:23325311-23325754	TE_homo_94755	Fvb5	23325311	23325754	444	30	18	0.733	.	AGGGCCCUGUAUAUAUAUAUAUA	5	3	2	3	2	11	9	23	N
Fvb5:23728460-23728693	TE_homo_94987	Fvb5	23728460	23728693	234	1	1	1	+	AUGUUUUUUUAGUGUAUUCGGUA	1	0	0	0	0	1	0	23	N
Fvb5:25038153-25038234	TE_homo_95794	Fvb5	25038153	25038234	82	4	4	0.25	.	AUUUUAGGGAUUGUAAAUGGGGGA	1	0	0	0	0	2	2	23	N
Fvb5:26450295-26450440	TE_homo_96651	Fvb5	26450295	26450440	146	4	4	0.75	.	AUUAAUCGCCAUAUAAUUUCUAUA	1	0	0	0	0	2	2	23	N
Fvb5:27264176-27264326	TE_homo_97268	Fvb5	27264176	27264326	151	8	7	0.5	.	UACACAUAUAUAUACAAGGAAAG	2	0	1	0	0	4	3	23	N
Fvb5:28467178-28467567	TE_homo_98039	Fvb5	28467178	28467567	390	2	2	0	-	AAGCUGCUGCUUUGACUUUGCCU	1	0	0	0	0	1	1	23	N
Fvb5:29078978-29079157	TE_homo_98388	Fvb5	29078978	29079157	180	1	1	0	-	AAUGGUAAGGUAGCAAAUUAACU	1	0	0	0	0	1	0	23	N
Fvb6:87991-88431	TE_homo_98722	Fvb6	87991	88431	441	380	59	0.821	+	UGAAAUUUUGUAGAGGUGAUCUA	201	3	1	6	33	213	124	23	N
Fvb6:4058030-4058191	TE_homo_100443	Fvb6	4058030	4058191	162	1	1	1	+	CCAGGUGGUGGAGCUGUUGCACC	1	0	0	0	0	1	0	23	N
Fvb6:7935725-7935911	TE_homo_102444	Fvb6	7935725	7935911	187	5	4	0.4	.	CCAUAAUUCGUCGGCUAAACCUU	2	0	0	0	0	3	2	23	N
Fvb6:8670602-8670944	TE_homo_102941	Fvb6	8670602	8670944	343	2	2	0.5	.	GAGGUAUAAUGUUGAUUUGAGCCU	1	0	0	0	0	1	1	23	N
Fvb6:8839377-8839482	TE_homo_102990	Fvb6	8839377	8839482	106	2	2	1	+	AGUGGGCACAAUAACCAAACACCU	1	0	0	0	0	1	1	23	N
Fvb6:8870719-8870942	TE_homo_103006	Fvb6	8870719	8870942	224	1	1	0	-	UUUUUUAUAAGGUUUAGUCAACA	1	0	0	0	0	1	0	23	N
Fvb6:10159723-10159829	TE_homo_103799	Fvb6	10159723	10159829	107	3	3	0.333	.	UAUUAGCAAUUGUCGUGGAUACU	1	0	0	0	0	2	1	23	N
Fvb6:12430554-12431209	TE_struc_2594	Fvb6	12430554	12431209	656	98	45	0.286	.	UUAUCUAAUUACGGGUACGGGGA	45	0	0	1	2	57	38	23	N
Fvb6:12809490-12809734	TE_homo_105448	Fvb6	12809490	12809734	245	15	9	0.933	+	CUUCUAUGUAGAGUUGGUUCACA	7	0	0	0	2	7	6	23	N
Fvb6:12902710-12902865	TE_homo_105495	Fvb6	12902710	12902865	156	9	8	0.667	.	GGGUCUUGUCAUGGAUUGUGCUA	2	0	0	0	0	5	4	23	N
Fvb6:13514287-13514516	TE_homo_105980	Fvb6	13514287	13514516	230	2	2	0.5	.	CAGAAAGGAUGUAGAGCGGCUUU	1	0	0	0	0	1	1	23	N
Fvb6:14426755-14427076	TE_homo_106686	Fvb6	14426755	14427076	322	2	2	0.5	.	CCUCGGGUAGAUAAAGUGCUUUC	1	0	0	0	0	1	1	23	N
Fvb6:14822199-14822363	TE_homo_106982	Fvb6	14822199	14822363	165	4	4	0.5	.	UGCAAUAAAAGAAUCUUCGUUUA	1	0	0	0	0	3	1	23	N
Fvb6:14822381-14822471	TE_homo_106983	Fvb6	14822381	14822471	91	2	2	0.5	.	UUCAUGAACCAAACGAACACCUU	1	0	0	0	0	1	1	23	N
Fvb6:15074274-15074595	TE_homo_107167	Fvb6	15074274	15074595	322	16	11	0.812	+	CGGGAGGACCACGUAGUAUGACA	5	1	0	0	1	9	5	23	N
Fvb6:16463891-16464022	TE_homo_108364	Fvb6	16463891	16464022	132	3	2	1	+	ACGAAAAAUUGAUUCGUCGGCCU	2	0	0	0	0	3	0	23	N
Fvb6:16545820-16546187	TE_homo_108416	Fvb6	16545820	16546187	368	2	2	0	-	CUUUACACACACCGAAUCGAGCUU	1	0	0	0	0	1	1	23	N
Fvb6:16546259-16546489	TE_homo_108418	Fvb6	16546259	16546489	231	1	1	1	+	UUUAAAUACUAUAAAGUCGGCUU	1	0	0	0	0	1	0	23	N
Fvb6:16848110-16848239	TE_homo_108667	Fvb6	16848110	16848239	130	3	3	0.333	.	AAUCACGACCAAAAUUUGACAG	1	0	0	0	1	2	0	23	N
Fvb6:18766027-18766182	TE_homo_110250	Fvb6	18766027	18766182	156	1	1	0	-	AAGAAGAUAAAAAUUAAGUCAUU	1	0	0	0	0	1	0	23	N
Fvb6:18783865-18783960	TE_homo_110275	Fvb6	18783865	18783960	96	2	2	0	-	CAAACAAAGGAAAAGAACCACUU	1	0	0	0	0	1	1	23	N
Fvb6:19167854-19167955	TE_homo_110528	Fvb6	19167854	19167955	102	1	1	0	-	GUCUGGGAUGUCCACGAUCUCUA	1	0	0	0	0	1	0	23	N
Fvb6:19194039-19194657	TE_homo_110545	Fvb6	19194039	19194657	619	6	6	0.5	.	AUACUAAGGUGUUCAUGUUCGGCU	1	1	0	1	0	2	2	23	N
Fvb6:21099325-21099457	TE_homo_112119	Fvb6	21099325	21099457	133	9	5	0.889	+	CAAGGACUAAACAAAUUUCAAUU	5	0	0	0	0	5	4	23	N
Fvb6:21857849-21857985	TE_homo_112788	Fvb6	21857849	21857985	137	2	2	0	-	CAAAUGGAGAUCUUCAAAUAAAG	1	0	0	0	0	1	1	23	N
Fvb6:23070744-23070925	TE_homo_113601	Fvb6	23070744	23070925	182	2	2	1	+	AACCGUGAAAAGUUCUGAAAACU	1	0	0	0	0	1	1	23	N
Fvb6:23105885-23106046	TE_homo_113639	Fvb6	23105885	23106046	162	2	2	0.5	.	AGUUGACUGUCCAGAAGGGACAGA	1	0	0	0	0	1	1	23	N
Fvb6:23932387-23932546	TE_homo_114281	Fvb6	23932387	23932546	160	5	5	1	+	UUGGCAAUGAAAGUAGAACUUCA	1	0	0	0	0	3	2	23	N
Fvb6:25169006-25169167	TE_homo_115043	Fvb6	25169006	25169167	162	1	1	1	+	UCCAUUCUGGACAGUCAACUUCC	1	0	0	0	0	1	0	23	N
Fvb6:25246707-25246868	TE_homo_115108	Fvb6	25246707	25246868	162	1	1	0	-	AACCGUGAAAAGUUCUGAAAACU	1	0	0	0	0	1	0	23	N
Fvb6:25614021-25614400	TE_homo_115372	Fvb6	25614021	25614400	380	4	4	0.75	.	ACACAACCCGGACAAAGAAACAAG	1	0	0	0	0	2	2	23	N
Fvb6:29274163-29274310	TE_homo_117718	Fvb6	29274163	29274310	148	7	5	0.143	-	AGUAGAAUUAACUAGUCAUGGAG	2	1	0	0	0	4	2	23	N
Fvb6:30845042-30845181	TE_homo_118570	Fvb6	30845042	30845181	140	1	1	1	+	AUAAAUGUCAGAAUUCAAUCAAA	1	0	0	0	0	1	0	23	N
Fvb6:31121428-31121610	TE_homo_118804	Fvb6	31121428	31121610	183	5	5	1	+	UAUAUGUAGCUACCGAACCUUCU	1	1	0	0	0	2	2	23	N
Fvb6:32772100-32772720	TE_homo_119710	Fvb6	32772100	32772720	621	3	2	0	-	UGAUUUUUGCAGCUUAAUCCAUU	2	0	0	0	0	3	0	23	N
Fvb6:33589544-33589736	TE_homo_120110	Fvb6	33589544	33589736	193	1	1	1	+	AAUUAUGGCAUAAUUCGUCGGCU	1	0	0	0	0	1	0	23	N
Fvb6:34531485-34531727	TE_homo_120590	Fvb6	34531485	34531727	243	2	2	0	-	AAUAAGAUUCAUUGUUGGAGAUA	1	0	0	0	0	2	0	23	N
Fvb6:35137917-35138062	TE_homo_120847	Fvb6	35137917	35138062	146	1	1	0	-	GUUCCAUAUUGUUGUAGUGCUUU	1	0	0	0	0	1	0	23	N
Fvb6:35997170-35997560	TE_homo_121160	Fvb6	35997170	35997560	391	7	3	0.143	-	UUAUCUAAUUACGGGUACGGGGA	5	0	0	0	0	5	2	23	N
Fvb6:36997905-36998377	TE_homo_121541	Fvb6	36997905	36998377	473	1	1	1	+	AAGGAUAUAAAUAUAUUUAAACU	1	0	0	0	0	1	0	23	N
Fvb6:37076726-37076859	TE_homo_121549	Fvb6	37076726	37076859	134	176	47	0.835	+	ACGAAAAAAUAAUUCGUCGGCCU	102	2	2	5	4	110	53	23	N
Fvb7:1737133-1737246	TE_homo_123401	Fvb7	1737133	1737246	114	5	5	0.6	.	CACAUUUUACUUCACACC	1	1	0	0	0	2	2	23	N
Fvb7:2347112-2347191	TE_homo_123842	Fvb7	2347112	2347191	80	5	4	0.8	+	AUAUGGUUAAGUUGGAAAAUAUC	2	0	0	0	1	3	1	23	N
Fvb7:2855172-2855486	TE_homo_124193	Fvb7	2855172	2855486	315	2	2	0.5	.	GAAACAGACAAUAUUUCGUCGGCU	1	0	0	0	0	1	1	23	N
Fvb7:5711492-5711854	TE_homo_126193	Fvb7	5711492	5711854	363	2	2	0.5	.	UUCAUUUUGGAGUCUGGGUUUCU	1	0	0	0	0	1	1	23	N
Fvb7:5785481-5785695	TE_homo_126233	Fvb7	5785481	5785695	215	3	3	0.333	.	GAUAAUUUUUUGAACUCAUGGCA	1	0	0	0	0	2	1	23	N
Fvb7:6246449-6246588	TE_homo_126499	Fvb7	6246449	6246588	140	1	1	1	+	AGUAGUAGAAAUUUUUUAAAGAA	1	0	0	0	0	1	0	23	N
Fvb7:7355167-7355341	TE_homo_127166	Fvb7	7355167	7355341	175	8	8	0.375	.	CAUUAGGCCUGGGCAUAUUGACC	1	0	0	1	0	4	3	23	N
Fvb7:8002983-8003338	TE_homo_127494	Fvb7	8002983	8003338	356	5	5	0	-	CACCGAAUCGAGCUACUAAAUUCU	1	1	0	0	1	2	1	23	N
Fvb7:8732209-8732686	TE_struc_3175	Fvb7	8732209	8732686	478	235	60	0.953	+	AAGAAGGACUAACAUGAUAAUCA	75	2	3	4	40	101	85	23	N
Fvb7:9528968-9529710	TE_struc_3186	Fvb7	9528968	9529710	743	2	2	1	+	AAAUUUAAUGAGACAUGUAAAUU	1	0	0	0	0	1	1	23	N
Fvb7:10361655-10362051	TE_homo_128914	Fvb7	10361655	10362051	397	4	4	0.25	.	ACCCCUUCGGGCCUAAUAAUAGCU	1	0	0	0	0	2	2	23	N
Fvb7:13841341-13841509	TE_homo_130815	Fvb7	13841341	13841509	169	2	2	0.5	.	AACCAUGAAAAGUUCUGAAAACU	1	0	0	0	0	1	1	23	N
Fvb7:19299669-19299779	TE_homo_133223	Fvb7	19299669	19299779	111	4	3	0.5	.	AAUAAUUUUUCAAUGUCUUAACA	2	0	0	0	0	2	2	23	N
Fvb7:22583949-22584079	TE_homo_134217	Fvb7	22583949	22584079	131	4	3	0.75	.	UAGUGUAGCUAUUAGAGGUGUUA	2	0	0	0	0	3	1	23	N
Fvb7:22583954-22584095	TE_homo_134218	Fvb7	22583954	22584095	142	4	3	0.75	.	UAGUGUAGCUAUUAGAGGUGUUA	2	0	0	0	0	3	1	23	N
Fvb7:23259722-23259802	TE_homo_134512	Fvb7	23259722	23259802	81	2	2	0.5	.	AUCUCCAACCAUUGUCCUAAAACC	1	0	0	0	0	1	1	23	N
Fvb7:23516246-23516330	TE_homo_134618	Fvb7	23516246	23516330	85	3	3	0	-	GCAUGUAGAAUUGUGAUAGUUUU	1	0	0	0	0	2	1	23	N
Fvb7:24106186-24106368	TE_homo_134810	Fvb7	24106186	24106368	183	19	12	0.632	.	CACCGUUGGAUGUAAAUUCAAGG	7	2	0	0	1	11	5	23	N
Fvb7:24221317-24221407	TE_homo_134860	Fvb7	24221317	24221407	91	5	5	1	+	ACUUCACAACAUGAGAUUGAUGA	1	1	0	0	0	2	2	23	N
contig_11:5930-6114	TE_homo_135090	contig_11	5930	6114	185	3	3	0.333	.	CAUAAGAUCAAUCUCGCCGGAAA	1	0	0	0	0	2	1	23	N
Fvb1:19422-19769	TE_homo_7	Fvb1	19422	19769	348	229	131	0.489	.	AUGGGAAUGACACUAUGAAAUCGU	8	5	1	8	5	39	171	24	N
Fvb1:31059-31394	TE_homo_12	Fvb1	31059	31394	336	450	220	0.416	.	AGGCCGGAUGUGGAGCGCACGUGC	41	31	5	32	27	38	317	24	N
Fvb1:33583-33969	TE_struc_20	Fvb1	33583	33969	387	31	13	0.968	+	AAAGUGUAGGGACUAACAUGAAGU	8	0	0	2	0	8	21	24	N
Fvb1:38904-39045	TE_homo_20	Fvb1	38904	39045	142	377	129	0.695	.	AUAUUACGAGAGAACCACAUGACA	67	22	6	12	8	61	268	24	N
Fvb1:45159-45294	TE_homo_22	Fvb1	45159	45294	136	806	240	0.567	.	GAUGGACGGGUGCGCUGAAUACGC	84	41	9	36	18	131	571	24	N
Fvb1:45512-45965	TE_homo_23	Fvb1	45512	45965	454	54	42	0.722	.	AUAUGACUGGUGGGUCGCACAAGA	4	1	2	0	1	11	39	24	N
Fvb1:51739-52160	TE_homo_26	Fvb1	51739	52160	422	322	142	0.528	.	CGAAUCAGUGAUCAUUAAGGUGAC	34	7	9	6	6	46	248	24	N
Fvb1:180136-180479	TE_homo_73	Fvb1	180136	180479	344	25	19	0.52	.	AAGUUACAGAGAGGAUUCAAAGCA	3	1	1	0	0	6	17	24	N
Fvb1:190363-190459	TE_homo_77	Fvb1	190363	190459	97	378	78	0.212	.	UAGGUGAACAUGACUGACCGAGAA	82	6	7	13	1	28	323	24	N
Fvb1:215279-215510	TE_homo_82	Fvb1	215279	215510	232	52	33	0.615	.	AAGGUUAAAAUUAGUCGGUAUUGA	6	1	0	1	1	8	41	24	N
Fvb1:217218-217488	TE_homo_86	Fvb1	217218	217488	271	224	88	0.371	.	AGGACGAAUAACUGUAUAAUACGG	53	8	4	7	2	26	177	24	N
Fvb1:319781-320473	TE_homo_112	Fvb1	319781	320473	693	31	27	0.548	.	AACCGCAUCGAACCGACAAUGAGU	2	1	0	0	0	7	23	24	N
Fvb1:394404-394789	TE_struc_22	Fvb1	394404	394789	386	581	180	0.225	.	AAACGGAAUAUGAGAAUUUAGGCA	86	11	5	18	11	59	477	24	N
Fvb1:425325-425675	TE_homo_137	Fvb1	425325	425675	351	759	241	0.813	+	AACUGAGAAACUGAAGAAUAAAGG	130	18	12	15	18	133	563	24	N
Fvb1:434814-435169	TE_struc_23	Fvb1	434814	435169	356	1051	248	0.478	.	AGGACCACGUUAGACUGUCACAUG	112	35	15	30	19	95	857	24	N
Fvb1:476902-476982	TE_homo_146	Fvb1	476902	476982	81	44	27	0.591	.	AGAGACAUGUGUCACAAAUCUAGA	5	1	1	2	0	3	37	24	N
Fvb1:476903-477001	TE_homo_147	Fvb1	476903	477001	99	45	28	0.578	.	AGAGACAUGUGUCACAAAUCUAGA	5	1	1	2	0	4	37	24	N
Fvb1:552141-552255	TE_homo_162	Fvb1	552141	552255	115	2090	309	0.495	.	AUCGACGGUGGAGAUGACGGGUGC	514	23	5	65	28	171	1798	24	N
Fvb1:565782-565976	TE_homo_165	Fvb1	565782	565976	195	285	126	0.596	.	GUGUCAAUAGACUAAGAGGAUAGA	19	3	3	16	7	37	219	24	N
Fvb1:606946-607337	TE_homo_172	Fvb1	606946	607337	392	136	88	0.301	.	AUUAGAUAAUGAGUAUUCCCCGUA	6	3	1	2	5	15	110	24	N
Fvb1:609334-609553	TE_homo_178	Fvb1	609334	609553	220	71	47	0.282	.	AUGGGGAUCCUCAGUAUUCGGAUU	10	3	1	3	2	10	52	24	N
Fvb1:611754-611909	TE_homo_179	Fvb1	611754	611909	156	427	174	0.63	.	UUUCGGUUUCUUGUUUGAAAGAUC	50	16	6	13	14	68	310	24	N
Fvb1:629572-629748	TE_homo_188	Fvb1	629572	629748	177	155	87	0.477	.	AUGGGUUGGACUGAGAGGUUAGAC	11	3	4	6	5	32	105	24	N
Fvb1:629806-630008	TE_homo_189	Fvb1	629806	630008	203	262	98	0.622	.	UUUCGUUGUUGUAUUGUCGAACAA	75	9	3	5	10	27	208	24	N
Fvb1:705619-705739	TE_struc_24	Fvb1	705619	705739	121	27	20	0.63	.	CAGAUCCGGACGGUAUGCUAUACC	6	3	1	4	1	4	14	24	N
Fvb1:710816-711290	TE_homo_216	Fvb1	710816	711290	475	30	23	0.3	.	AAUCAAUUUGUUCUUAGUGGCGGA	2	1	1	0	0	2	26	24	N
Fvb1:716236-716968	TE_homo_219	Fvb1	716236	716968	733	388	155	0.704	.	GUAGUAACUAUUAGAAUCUUGGAC	48	3	12	9	7	60	297	24	N
Fvb1:729337-729474	TE_homo_225	Fvb1	729337	729474	138	482	60	0.093	-	AGGAAUCGGCUCCUGAUGAGGAGG	356	3	0	2	2	24	451	24	N
Fvb1:777741-777849	TE_homo_243	Fvb1	777741	777849	109	12	12	0.667	.	AGACUCCAGCAGCGUCCCCGGCGA	1	0	1	1	0	2	8	24	N
Fvb1:859973-860264	TE_homo_268	Fvb1	859973	860264	292	581	144	0.806	+	AGUCCUUGUGGUUUGAAGUCGACA	186	27	13	10	4	44	483	24	N
Fvb1:957116-957221	TE_homo_276	Fvb1	957116	957221	106	186	72	0.5	.	AGAGAAUCAUGGUCAAUCAUUCUG	20	5	9	6	1	31	134	24	N
Fvb1:1002279-1002421	TE_homo_291	Fvb1	1002279	1002421	143	1600	296	0.656	.	GAGGACUCUUAAGUUGAAAACUUU	292	41	41	23	16	214	1265	24	N
Fvb1:1005088-1005259	TE_homo_294	Fvb1	1005088	1005259	172	398	173	0.558	.	AGUGUUCACCGGGUCAAUUACUGA	30	10	6	10	13	49	310	24	N
Fvb1:1026178-1026415	TE_homo_304	Fvb1	1026178	1026415	238	265	58	0.181	-	AGGACUCUAAACUUAAACGGCGCC	167	8	2	4	0	9	242	24	N
Fvb1:1027212-1027407	TE_homo_306	Fvb1	1027212	1027407	196	12	9	0.083	-	AUUUUGAUCGUCUAUUUUGUAGAU	4	0	1	0	0	1	10	24	N
Fvb1:1100375-1100744	TE_homo_328	Fvb1	1100375	1100744	370	27	24	0.333	.	AGAAAAGUUAGGGUAGCACAUUGG	2	1	1	1	0	3	21	24	N
Fvb1:1100495-1100775	TE_homo_329	Fvb1	1100495	1100775	281	15	13	0.6	.	AGAAAUAAUUCAUGUUUGGAUGAA	2	0	1	1	0	1	12	24	N
Fvb1:1160281-1160595	TE_homo_366	Fvb1	1160281	1160595	315	76	49	0.829	+	AGAGGAGAUGCACAGCUAGUCGGG	5	0	0	1	3	12	60	24	N
Fvb1:1162640-1162969	TE_homo_373	Fvb1	1162640	1162969	330	59	46	0.814	+	GAGAUGCACAGCUAGUCGGGAAGU	4	1	0	7	1	11	39	24	N
Fvb1:1163018-1163101	TE_homo_374	Fvb1	1163018	1163101	84	1	1	0	-	AGCAAGGGUUGGUAGGGCUUAAGC	1	0	0	0	0	0	1	24	N
Fvb1:1199800-1200185	TE_homo_388	Fvb1	1199800	1200185	386	1488	356	0.792	.	ACGGAAUAUGAGAAUUUGGGCACG	72	96	18	47	30	199	1098	24	N
Fvb1:1291560-1291791	TE_homo_423	Fvb1	1291560	1291791	232	4	4	0.25	.	GAUUAUUAAGUCAUCCAAAUGAGA	1	0	0	0	0	0	4	24	N
Fvb1:1292481-1292737	TE_homo_431	Fvb1	1292481	1292737	257	31	26	0.613	.	UUCCGUUCUUCGUCUGGUGCUGGC	3	0	1	0	2	4	24	24	N
Fvb1:1303151-1303520	TE_homo_449	Fvb1	1303151	1303520	370	91	64	0.242	.	AACAACGUCUAGGGUGAGUAAACU	11	3	2	1	3	13	69	24	N
Fvb1:1308669-1308781	TE_homo_454	Fvb1	1308669	1308781	113	68	39	0.809	+	AACGGAAUAUUCUAACAGAAAGGA	11	2	1	0	1	11	53	24	N
Fvb1:1380771-1380877	TE_homo_482	Fvb1	1380771	1380877	107	412	156	0.864	+	AGAGACAUGCGUCAAUAGACUAAG	52	12	12	13	13	51	311	24	N
Fvb1:1385073-1385167	TE_homo_485	Fvb1	1385073	1385167	95	603	148	0.156	-	AUGGACGGUGGAUACACCCGGGUG	155	25	2	20	7	44	505	24	N
Fvb1:1413293-1413901	TE_homo_494	Fvb1	1413293	1413901	609	83	42	0.759	.	ACGGGACAGAUAUUUAAAAACGCC	24	3	1	3	2	3	71	24	N
Fvb1:1442780-1442897	TE_homo_497	Fvb1	1442780	1442897	118	87	44	0.701	.	AUGGUGUGUAGAUUUCAAUUUGAA	10	2	1	2	2	11	69	24	N
Fvb1:1473567-1473974	TE_homo_503	Fvb1	1473567	1473974	408	451	183	0.659	.	GAGGACUUUUUGGCUUAUCCCACU	19	14	10	3	18	69	337	24	N
Fvb1:1498369-1498503	TE_homo_508	Fvb1	1498369	1498503	135	387	98	0.685	.	AAUGAGGUAAUGAGGUUUGAACCC	47	10	4	6	7	32	328	24	N
Fvb1:1503343-1503504	TE_homo_509	Fvb1	1503343	1503504	162	262	112	0.202	.	ACACAAGUGUAGAUUGCAACACCU	37	13	7	8	4	41	189	24	N
Fvb1:1506536-1506844	TE_homo_510	Fvb1	1506536	1506844	309	12	10	0.75	.	UAAUUAGAAGCUCCAGCAUAGUGC	3	0	0	1	1	3	7	24	N
Fvb1:1552778-1553045	TE_homo_517	Fvb1	1552778	1553045	268	270	86	0.941	+	AAACCGGAAAAGAAUGGACUUGCC	88	40	6	25	33	18	148	24	N
Fvb1:1609878-1610255	TE_homo_533	Fvb1	1609878	1610255	378	18	12	0.833	+	AGCUUUGCAUUCUGUUGUUUGGAA	7	0	0	1	0	2	15	24	N
Fvb1:1645166-1645583	TE_homo_542	Fvb1	1645166	1645583	418	708	249	0.542	.	UUAAGUUGAGGACUAGUUGAAGAC	31	54	32	10	12	86	514	24	N
Fvb1:1662622-1663181	TE_struc_30	Fvb1	1662622	1663181	560	13	11	0.231	.	ACGGAGCUAGGAAUUUGAAAUACC	3	0	1	0	0	1	11	24	N
Fvb1:1669201-1669605	TE_homo_562	Fvb1	1669201	1669605	405	21	12	0.762	.	GAAUAAGAGUGCGGUUUUUGGGAC	7	4	0	4	1	0	12	24	N
Fvb1:1686173-1686308	TE_homo_572	Fvb1	1686173	1686308	136	94	55	0.181	-	GAUAAAAUUGAAAGUUUAGGGACU	15	2	0	1	0	10	81	24	N
Fvb1:1693911-1694106	TE_homo_577	Fvb1	1693911	1694106	196	296	132	0.682	.	UAACAUGAUUUUAGCUCUAAACCA	55	14	6	5	12	45	214	24	N
Fvb1:1741039-1741457	TE_struc_31	Fvb1	1741039	1741457	419	264	113	0.735	.	UAUGAUGGGGAAGCUGUUGGACCU	18	27	2	10	4	46	175	24	N
Fvb1:1743788-1744128	TE_homo_587	Fvb1	1743788	1744128	341	16	14	0.562	.	GUCAUGUGCAACCCACCAGUCGCA	2	0	0	1	1	2	12	24	N
Fvb1:1753438-1753858	TE_homo_590	Fvb1	1753438	1753858	421	766	239	0.345	.	AGGACUUAGUGAGAACUUUUCGGU	55	33	13	16	22	114	568	24	N
Fvb1:1793647-1793936	TE_homo_600	Fvb1	1793647	1793936	290	93	47	0.538	.	AGGUAUACUGUUGGAGCUCCUAUU	11	0	2	1	0	13	77	24	N
Fvb1:1852054-1852670	TE_homo_613	Fvb1	1852054	1852670	617	333	133	0.396	.	AGCCCAUAUGGUUUUGGAAUCCUG	29	25	5	12	5	36	250	24	N
Fvb1:1859051-1859464	TE_homo_614	Fvb1	1859051	1859464	414	346	98	0.39	.	GUGGAGCUCACACGCACAUGGUUG	91	7	0	5	3	54	277	24	N
Fvb1:1908596-1908988	TE_homo_628	Fvb1	1908596	1908988	393	89	50	0.438	.	AGAGGCGGAACUGUGUUUGGGUCU	13	2	2	2	2	8	73	24	N
Fvb1:1924529-1924922	TE_homo_632	Fvb1	1924529	1924922	394	175	102	0.634	.	UCGAGAUUCUUGGCUCGUCGGAGC	17	14	1	7	9	16	128	24	N
Fvb1:1924617-1925006	TE_homo_633	Fvb1	1924617	1925006	390	212	109	0.675	.	AACCGUCAGCCGGUCGUACAGACA	27	8	1	7	8	18	170	24	N
Fvb1:1971300-1971662	TE_homo_642	Fvb1	1971300	1971662	363	186	87	0.457	.	UUGGAUCCGCCACUGAUAUAGAGC	42	4	6	10	10	18	138	24	N
Fvb1:1986105-1986266	TE_homo_650	Fvb1	1986105	1986266	162	22	16	0.818	+	AAUUCUCUUGAUUGGUCAGUAGGU	4	1	0	1	0	4	16	24	N
Fvb1:1986971-1987065	TE_homo_652	Fvb1	1986971	1987065	95	13	10	0.769	.	UUUGAUUCCUAGACUGUUAGGUAU	4	0	0	0	0	2	11	24	N
Fvb1:1987144-1987263	TE_homo_653	Fvb1	1987144	1987263	120	46	26	0.848	+	AUUCAUGGUCAAUCACUGUUAGAU	5	0	0	2	1	4	39	24	N
Fvb1:1993025-1993294	TE_homo_663	Fvb1	1993025	1993294	270	32	17	0.438	.	GGGAGUGAAAACGAUGAUAAGUCU	7	2	0	0	0	4	26	24	N
Fvb1:1995338-1995491	TE_homo_664	Fvb1	1995338	1995491	154	95	35	0.253	.	ACUCCUCGAAUUGUAAUUUACACU	23	1	3	4	2	11	74	24	N
Fvb1:2000058-2000346	TE_homo_667	Fvb1	2000058	2000346	289	119	54	0.244	.	CCGAUUAGUAGAACGAAUAACUGU	26	6	5	3	3	15	87	24	N
Fvb1:2001601-2001781	TE_homo_673	Fvb1	2001601	2001781	181	3	2	0.667	.	UCAACUAGUUAGGAGGAAUCCUGU	2	0	0	0	0	0	3	24	N
Fvb1:2002011-2002161	TE_homo_675	Fvb1	2002011	2002161	151	1	1	1	+	UUUCCUAAGUUUGAUGAUUCAGGC	1	0	0	0	0	0	1	24	N
Fvb1:2009070-2009291	TE_homo_677	Fvb1	2009070	2009291	222	55	37	0.782	.	AAAUCGGGCGGGACUUAACUUUCC	7	5	0	1	0	15	34	24	N
Fvb1:2037825-2038580	TE_struc_33	Fvb1	2037825	2038580	756	1111	434	0.419	.	ACGGGCUCGGGCUUAGGCAGAUCC	98	57	15	55	18	125	841	24	N
Fvb1:2092894-2093486	TE_struc_34	Fvb1	2092894	2093486	593	424	205	0.606	.	GAGUAUGACAACCAUUGUUGGAGA	46	20	6	14	13	51	320	24	N
Fvb1:2119094-2119498	TE_homo_708	Fvb1	2119094	2119498	405	3659	557	0.403	.	AGAGAAUCCGGAUGUACACGUACA	306	103	46	127	61	628	2694	24	N
Fvb1:2135776-2136196	TE_homo_715	Fvb1	2135776	2136196	421	1526	476	0.52	.	ACUGAACGGUCAAUAUGUAGAUAU	115	78	23	38	38	260	1089	24	N
Fvb1:2256292-2256849	TE_homo_747	Fvb1	2256292	2256849	558	225	123	0.578	.	AGGUACACUGAGCAAAUCUGGAGG	12	35	0	8	4	27	151	24	N
Fvb1:2260051-2260340	TE_homo_752	Fvb1	2260051	2260340	290	5	4	0.8	+	CAGACUUUAGCCGACGAAACAAUU	2	0	0	1	0	0	4	24	N
Fvb1:2260341-2260455	TE_homo_753	Fvb1	2260341	2260455	115	1	1	0	-	AGAAAGUUGUUCGAAAUGUUGAGA	1	0	0	0	0	0	1	24	N
Fvb1:2260527-2260887	TE_homo_755	Fvb1	2260527	2260887	361	22	11	0.682	.	AGGAGAAUGUAGUACUAAUCAAAC	9	1	0	0	0	2	19	24	N
Fvb1:2273792-2273976	TE_homo_765	Fvb1	2273792	2273976	185	77	32	0.584	.	AGUUUUUAGGUUUAUAUGAGUAGA	19	2	0	2	0	12	61	24	N
Fvb1:2273829-2274013	TE_homo_766	Fvb1	2273829	2274013	185	55	19	0.455	.	AGUUUUUAGGUUUAUAUGAGUAGA	19	0	0	0	0	8	47	24	N
Fvb1:2282949-2283272	TE_homo_775	Fvb1	2282949	2283272	324	49	30	0.408	.	AUUCAACUGAAGAUGAGAUGAACU	10	1	0	0	0	7	41	24	N
Fvb1:2311153-2311538	TE_homo_785	Fvb1	2311153	2311538	386	302	156	0.526	.	AAUCAUGAGACUGUUAACUUUCA	19	14	3	13	7	50	215	24	N
Fvb1:2335981-2336600	TE_homo_791	Fvb1	2335981	2336600	620	489	262	0.411	.	AAGAACUCAGAAGAUGAUCAAAAU	23	23	8	19	8	67	364	24	N
Fvb1:2336654-2337071	TE_homo_792	Fvb1	2336654	2337071	418	743	172	0.681	.	GAGGACCUUUAAGUUGAUGACUAG	308	9	16	8	16	62	632	24	N
Fvb1:2373350-2373531	TE_homo_801	Fvb1	2373350	2373531	182	1454	252	0.563	.	CAAAACUUUGAUCCAACGUACUGU	270	86	15	36	22	153	1142	24	N
Fvb1:2373775-2373957	TE_homo_802	Fvb1	2373775	2373957	183	290	120	0.179	-	AAGGCAUCGGUACAAUUAGAAAUU	34	15	3	7	4	33	228	24	N
Fvb1:2378541-2378809	TE_homo_809	Fvb1	2378541	2378809	269	3	3	1	+	UCAUUUUUAACCACACCGUUACA	1	0	0	0	0	1	2	24	N
Fvb1:2378879-2379022	TE_homo_811	Fvb1	2378879	2379022	144	1	1	1	+	GAAGUUUAAUAAGAUAGUUUAGGA	1	0	0	0	0	0	1	24	N
Fvb1:2379022-2379151	TE_homo_812	Fvb1	2379022	2379151	130	2	2	0.5	.	CAAAUUAAUUAACAUGCCCCCCCU	1	0	0	0	0	0	2	24	N
Fvb1:2379157-2379287	TE_homo_813	Fvb1	2379157	2379287	131	4	4	0.5	.	GAGGGCAUGUUAAUGAAUUUGAGC	1	0	0	0	0	1	3	24	N
Fvb1:2379359-2379492	TE_homo_815	Fvb1	2379359	2379492	134	1	1	1	+	AGCCACCGUUAAUGAAUUUGAGCU	1	0	0	0	0	0	1	24	N
Fvb1:2379459-2379617	TE_homo_816	Fvb1	2379459	2379617	159	5	5	0.6	.	AAUUUGAGUUAGAAAUCAGCCACC	1	0	0	0	0	0	5	24	N
Fvb1:2379620-2379745	TE_homo_817	Fvb1	2379620	2379745	126	1	1	0	-	CCAACCCUUGAAUUCCUAAACUAU	1	0	0	0	0	0	1	24	N
Fvb1:2385730-2385863	TE_homo_819	Fvb1	2385730	2385863	134	72	40	0.319	.	AAUAAUUGGUGUUAUGAUCGAUCU	10	2	0	2	1	6	61	24	N
Fvb1:2399078-2399160	TE_homo_825	Fvb1	2399078	2399160	83	23	14	0.043	-	AUUGAACUGUUUACUUACCAUAUG	4	1	1	1	0	9	11	24	N
Fvb1:2440513-2440787	TE_homo_854	Fvb1	2440513	2440787	275	31	19	0.774	.	AGAGAAACUUAUACGGAAUAUGUU	6	0	2	0	3	2	24	24	N
Fvb1:2451756-2451843	TE_homo_861	Fvb1	2451756	2451843	88	29	21	0.414	.	AGCUCUAUGAUUGUAUCUUGGACU	5	0	0	1	1	7	20	24	N
Fvb1:2451845-2452367	TE_struc_38	Fvb1	2451845	2452367	523	259	149	0.317	.	UGACGGAGGAAUUGAAUGAAGAAU	21	14	6	9	10	54	166	24	N
Fvb1:2452368-2452449	TE_homo_862	Fvb1	2452368	2452449	82	16	10	0.062	-	AGAGGAGAGUAGAAAAUAAUGAUU	5	0	0	0	0	5	11	24	N
Fvb1:2502652-2503035	TE_homo_884	Fvb1	2502652	2503035	384	401	138	0.546	.	AAACGGAAUAUGAGAAUUUGGGCA	34	8	4	18	12	46	313	24	N
Fvb1:2551961-2552347	TE_struc_41	Fvb1	2551961	2552347	387	200	109	0.405	.	AGUUAACGUUCGAUUUGGACAGGA	10	7	8	9	7	30	139	24	N
Fvb1:2566682-2566959	TE_homo_901	Fvb1	2566682	2566959	278	162	93	0.66	.	AAACCGAUCUGAACCGAACCGCAU	15	8	7	3	9	15	120	24	N
Fvb1:2585619-2585758	TE_homo_914	Fvb1	2585619	2585758	140	6	6	0.167	-	CGAGGAAAUCUGAGAAGAAAAAU	1	0	0	0	0	2	4	24	N
Fvb1:2604647-2604846	TE_homo_940	Fvb1	2604647	2604846	200	10	9	0.2	.	AAUUGGACGUAAUUUUAAAAUAGU	2	0	1	1	0	0	8	24	N
Fvb1:2604845-2605048	TE_homo_941	Fvb1	2604845	2605048	204	12	10	0.417	.	AAUUGGACGUAAUUUUAAAAUAGU	2	1	1	0	1	4	5	24	N
Fvb1:2606735-2606819	TE_homo_944	Fvb1	2606735	2606819	85	2	1	1	+	AUGAUGUCAACCCCAAACCUCAGA	2	0	0	0	0	0	2	24	N
Fvb1:2617493-2618051	TE_homo_953	Fvb1	2617493	2618051	559	91	59	0.33	.	AUACGUCGCCCGAUUUAAACCAGA	23	3	2	1	3	7	75	24	N
Fvb1:2619396-2619594	TE_homo_956	Fvb1	2619396	2619594	199	82	55	0.22	.	UUACAGGACUGAACUGAUUUUGCC	7	2	5	5	4	14	52	24	N
Fvb1:2619718-2619963	TE_homo_957	Fvb1	2619718	2619963	246	91	53	0.736	.	UUUGACACCAAAGAUUAGGGGGGU	13	3	4	1	0	17	66	24	N
Fvb1:2638991-2639268	TE_homo_974	Fvb1	2638991	2639268	278	180	69	0.228	.	AAUUUUGACUCAGGCCUGAAAAUC	22	1	1	10	2	33	133	24	N
Fvb1:2639390-2639520	TE_homo_975	Fvb1	2639390	2639520	131	902	177	0.307	.	ACAGGCCCGGACUUGAUAGGAGUC	350	56	4	39	14	50	739	24	N
Fvb1:2645056-2645828	TE_homo_977	Fvb1	2645056	2645828	773	173	112	0.595	.	AACGGGCUUGAGCCGUGCCGGGCC	11	7	1	9	5	31	120	24	N
Fvb1:2695780-2695925	TE_homo_998	Fvb1	2695780	2695925	146	65	43	0.415	.	AAGUUGUCUAGUCUAGUUAGAAGC	4	3	1	3	2	9	47	24	N
Fvb1:2720994-2721242	TE_homo_1008	Fvb1	2720994	2721242	249	74	54	0.378	.	CAUUGGAACAGAAAAUCGUUGGGA	5	0	1	2	2	13	56	24	N
Fvb1:2737865-2738083	TE_homo_1009	Fvb1	2737865	2738083	219	12	12	0.333	.	GAAAAUGUAUGGAUAAAAGGCUA	1	1	0	0	0	4	7	24	N
Fvb1:2765922-2766096	TE_homo_1014	Fvb1	2765922	2766096	175	129	66	0.279	.	AGUGUAGAUUACAAUUCGGAGAGU	28	7	2	7	8	15	90	24	N
Fvb1:2805443-2805954	TE_homo_1021	Fvb1	2805443	2805954	512	69	41	0.594	.	UACCUAUUUCGAUUGUCAAGACAU	5	0	0	1	3	4	61	24	N
Fvb1:2828997-2829170	TE_homo_1029	Fvb1	2828997	2829170	174	415	148	0.243	.	UGUGGAUUACAACUUGAAGUGUGU	29	10	4	11	6	75	309	24	N
Fvb1:2861586-2861703	TE_homo_1037	Fvb1	2861586	2861703	118	177	92	0.35	.	AUAAAAUAAACGAGACCUUACAGA	12	6	1	3	5	21	141	24	N
Fvb1:2862528-2862676	TE_homo_1039	Fvb1	2862528	2862676	149	91	39	0.67	.	AGUUCAUUUGUCUUUCCUACGAGA	12	1	4	1	0	21	64	24	N
Fvb1:2862545-2862773	TE_homo_1040	Fvb1	2862545	2862773	229	373	153	0.638	.	AAGGCGUGAGAAAGACAAAUGAAC	37	8	8	10	4	75	268	24	N
Fvb1:2894098-2894241	TE_homo_1056	Fvb1	2894098	2894241	144	4	4	1	+	UUACUAAAAAUAGAAACUGGGUGU	1	0	0	0	0	0	4	24	N
Fvb1:2937617-2937774	TE_homo_1069	Fvb1	2937617	2937774	158	3	3	0	-	AGCGAAUAUAAGAAGUAAGACAGU	1	0	0	0	0	1	2	24	N
Fvb1:3053365-3053488	TE_homo_1101	Fvb1	3053365	3053488	124	7	6	0.857	+	AAGUUUUGUCGGUGAGCCGUGGCU	2	0	0	0	0	1	6	24	N
Fvb1:3126177-3126431	TE_homo_1130	Fvb1	3126177	3126431	255	136	61	0.515	.	AGACGAAUAUCUGUAUAAUACGGU	31	5	1	3	3	15	109	24	N
Fvb1:3135269-3135613	TE_homo_1146	Fvb1	3135269	3135613	345	895	142	0.865	+	AAACAGAUCCAAUGGUGUAGACCU	182	12	6	10	6	89	772	24	N
Fvb1:3183536-3183924	TE_homo_1160	Fvb1	3183536	3183924	389	504	169	0.619	.	AGACCUAAAAACUGAACGGAUGAG	110	5	1	8	6	66	418	24	N
Fvb1:3227031-3227380	TE_homo_1173	Fvb1	3227031	3227380	350	163	84	0.761	.	AAUGAGUAAACGGAUAGACGAAAC	22	8	4	6	3	23	119	24	N
Fvb1:3313701-3313883	TE_homo_1200	Fvb1	3313701	3313883	183	1081	301	0.644	.	ACCUUAAGGGUGGUUAAGUUGGGA	63	38	16	33	30	258	706	24	N
Fvb1:3314017-3314210	TE_homo_1202	Fvb1	3314017	3314210	194	397	176	0.463	.	AUUGUACCGAGGUCUUUUGUGAUU	20	13	3	11	8	70	292	24	N
Fvb1:3328228-3328639	TE_homo_1209	Fvb1	3328228	3328639	412	427	217	0.529	.	GGAGAAUAAGAGGAGGAAGCUGUU	28	13	8	12	10	61	323	24	N
Fvb1:3344225-3344369	TE_homo_1215	Fvb1	3344225	3344369	145	70	42	0.514	.	GAAUGACACAUGUCUAUUGGACUU	7	5	0	1	5	6	53	24	N
Fvb1:3393388-3393544	TE_homo_1238	Fvb1	3393388	3393544	157	5	5	0.4	.	GGAGGGUGGGGAGCAAAUGG	1	1	0	1	0	0	3	24	N
Fvb1:3393410-3393566	TE_homo_1239	Fvb1	3393410	3393566	157	5	5	0.4	.	GGAGGGUGGGGAGCAAAUGG	1	1	0	1	0	0	3	24	N
Fvb1:3421225-3421611	TE_homo_1244	Fvb1	3421225	3421611	387	477	152	0.702	.	AAGUGUAGGGACUAACAUGAAGUC	39	21	1	12	10	92	341	24	N
Fvb1:3448446-3448568	TE_homo_1248	Fvb1	3448446	3448568	123	79	50	0.278	.	UUUGAGGUCAUGAGUUUAAACUUU	13	5	1	4	3	8	58	24	N
Fvb1:3469219-3470218	TE_homo_1255	Fvb1	3469219	3470218	1000	406	164	0.695	.	GAGAGAUAUACUGAGCAAAUUUGG	52	18	5	13	4	40	326	24	N
Fvb1:3470514-3470683	TE_homo_1256	Fvb1	3470514	3470683	170	11	6	0.818	+	ACGGCCUUGUUUGGUUAUAUGGAA	5	0	0	0	0	3	8	24	N
Fvb1:3470569-3470824	TE_homo_1257	Fvb1	3470569	3470824	256	7	5	1	+	AUAAAUCAUUUGGAGUUAGGAGGA	3	0	0	0	0	2	5	24	N
Fvb1:3472283-3472401	TE_homo_1261	Fvb1	3472283	3472401	119	3	3	0	-	AAAGUAGUUCCUAUGUUUGGUGUG	1	0	0	0	0	0	3	24	N
Fvb1:3473211-3473572	TE_homo_1262	Fvb1	3473211	3473572	362	63	47	0.444	.	AAGAGAAGGGACGUCGUCGGCGCU	5	2	0	6	3	6	46	24	N
Fvb1:3500883-3501571	TE_struc_49	Fvb1	3500883	3501571	689	248	150	0.504	.	GGGACAGGCCGUGGAAUUAGCUCU	10	8	2	10	2	49	177	24	N
Fvb1:3534658-3534926	TE_homo_1289	Fvb1	3534658	3534926	269	3	3	0	-	AUUGAGCCAUGAUUUGCUAAAGGA	1	0	0	0	0	1	2	24	N
Fvb1:3536818-3537125	TE_homo_1292	Fvb1	3536818	3537125	308	31	24	0.323	.	AGGGCAUAAACUGAAAGUUUCUGU	5	1	0	0	1	8	21	24	N
Fvb1:3560723-3561017	TE_homo_1296	Fvb1	3560723	3561017	295	277	118	0.404	.	AAAAUUUCGUCUAAUUGGGAGGCU	35	5	3	10	9	33	217	24	N
Fvb1:3610350-3610474	TE_homo_1319	Fvb1	3610350	3610474	125	91	48	0.33	.	UUCUUAACGAGGUCGGGUUUGAGC	13	2	7	7	4	15	56	24	N
Fvb1:3645368-3645805	TE_homo_1326	Fvb1	3645368	3645805	438	74	46	0.595	.	UAGGGAUAUGGCAUUACACCAACU	16	3	0	4	2	7	58	24	N
Fvb1:3683387-3683711	TE_homo_1337	Fvb1	3683387	3683711	325	43	24	0.512	.	GAAAGGAAAGUAGCUCUUUUGUCU	10	0	0	1	1	8	33	24	N
Fvb1:3684420-3684655	TE_homo_1338	Fvb1	3684420	3684655	236	342	102	0.871	+	AUCUAAAAGGAAAAUCGUGACUUU	132	9	2	14	11	61	245	24	N
Fvb1:3769071-3769362	TE_homo_1359	Fvb1	3769071	3769362	292	2162	298	0.1	-	AACGGAAUUGAGACUUUAUAGGAU	732	41	9	26	17	154	1915	24	N
Fvb1:3769772-3770005	TE_homo_1360	Fvb1	3769772	3770005	234	226	103	0.5	.	AGUUUCGUUGGCCUAGAUUCUGAU	28	9	3	11	12	22	169	24	N
Fvb1:3770005-3770230	TE_homo_1361	Fvb1	3770005	3770230	226	754	170	0.668	.	AACGGAAUUAAGACUUUGUAGGAU	135	19	4	14	19	92	606	24	N
Fvb1:3793725-3793992	TE_homo_1371	Fvb1	3793725	3793992	268	197	116	0.548	.	ACGGUGCGCCUCCACCCCAAAGGA	12	8	0	16	19	32	122	24	N
Fvb1:3822575-3822868	TE_homo_1375	Fvb1	3822575	3822868	294	271	123	0.59	.	AACGAUUGUUAUAAUAAUUUGGCU	22	11	7	8	3	47	195	24	N
Fvb1:3864917-3865667	TE_homo_1385	Fvb1	3864917	3865667	751	23	23	0.174	-	AUUGAGCUGGGCUGGGCUAUGAUA	1	0	0	3	0	3	17	24	N
Fvb1:3891731-3892378	TE_homo_1406	Fvb1	3891731	3892378	648	30	26	0.167	-	AUUGAUCAUCGACAGGGACGGAAC	3	0	0	1	1	8	20	24	N
Fvb1:3923528-3923912	TE_homo_1411	Fvb1	3923528	3923912	385	703	219	0.693	.	GAUGAAAAUAAAAGUGUAGGGACU	41	15	7	23	13	62	583	24	N
Fvb1:3947773-3948032	TE_homo_1419	Fvb1	3947773	3948032	260	253	136	0.628	.	AAAUUACCAGAAAAACAAGAGCUC	28	7	3	7	5	36	195	24	N
Fvb1:3971168-3971550	TE_homo_1433	Fvb1	3971168	3971550	383	358	166	0.207	.	AAACCGGACGGAAUUUUAGUAAUU	28	8	5	17	16	66	246	24	N
Fvb1:3974728-3974902	TE_homo_1435	Fvb1	3974728	3974902	175	126	57	0.167	-	CAUGCCACGUAGACAAGUUAACGG	30	2	0	5	1	21	97	24	N
Fvb1:3974752-3975026	TE_homo_1436	Fvb1	3974752	3975026	275	125	56	0.16	-	CAUGCCACGUAGACAAGUUAACGG	30	2	0	4	1	21	97	24	N
Fvb1:3975039-3975220	TE_homo_1437	Fvb1	3975039	3975220	182	18	12	0.222	.	AUCAAGUUCUUUAAUGAUUAAGUU	6	0	0	0	0	1	17	24	N
Fvb1:3979041-3979333	TE_homo_1438	Fvb1	3979041	3979333	293	23	19	0.783	.	AAUUGAAACUUUGUAGGAUUUUGC	3	1	0	0	1	1	20	24	N
Fvb1:3979642-3979896	TE_homo_1440	Fvb1	3979642	3979896	255	11	10	0.182	-	AUGGUUGGAGACAAAAUCUUUUGA	2	0	1	0	0	1	9	24	N
Fvb1:3980021-3980157	TE_homo_1441	Fvb1	3980021	3980157	137	181	78	0.923	+	AUAGGUAUGGGUAUAGAAAGAAUU	16	5	0	3	6	54	113	24	N
Fvb1:4027741-4027926	TE_struc_52	Fvb1	4027741	4027926	186	9	7	0.556	.	AGUGUGGAUUGUAAAAUGAGAAGU	3	1	0	0	0	1	7	24	N
Fvb1:4041523-4041938	TE_homo_1459	Fvb1	4041523	4041938	416	10	9	0.3	.	AAAUGCUGAAAUCUCCAAGAUGGA	2	0	0	0	0	2	8	24	N
Fvb1:4047847-4048351	TE_homo_1468	Fvb1	4047847	4048351	505	751	168	0.827	+	CGCCCUCGUCGGCACACUCGCACC	359	11	0	8	10	39	683	24	N
Fvb1:4052091-4052277	TE_homo_1470	Fvb1	4052091	4052277	187	14	13	0.786	.	ACAUAUAUAUGAGAUUUUAUGGGA	2	0	0	0	1	2	11	24	N
Fvb1:4058924-4059377	TE_homo_1474	Fvb1	4058924	4059377	454	234	131	0.59	.	AAACUGAUGUGGGACAACUGCCU	14	6	7	11	15	47	148	24	N
Fvb1:4087612-4087786	TE_homo_1484	Fvb1	4087612	4087786	175	253	106	0.625	.	GUGGAUUGCAACGUGUCAACGCCU	38	7	2	6	6	30	202	24	N
Fvb1:4090164-4090494	TE_homo_1485	Fvb1	4090164	4090494	331	500	193	0.65	.	AGUCCUUGUGGUUUGAAGUCGAUA	29	13	5	14	6	55	407	24	N
Fvb1:4101913-4102328	TE_homo_1486	Fvb1	4101913	4102328	416	150	103	0.393	.	AAAUUUUGGAGAAGCUGUUAGAGA	9	6	2	8	6	21	107	24	N
Fvb1:4129377-4129581	TE_homo_1493	Fvb1	4129377	4129581	205	370	155	0.797	.	AUCGAAAUUCUGAGUAUCAUGGUC	69	8	4	7	9	69	273	24	N
Fvb1:4142370-4142721	TE_homo_1497	Fvb1	4142370	4142721	352	865	384	0.527	.	AGAUUUCCGUCCUUUUGCCACUGU	38	47	4	59	68	106	581	24	N
Fvb1:4187504-4187913	TE_struc_55	Fvb1	4187504	4187913	410	289	101	0.543	.	AUGAGGGAGCCUUUCUAGUGAGGA	34	1	1	4	8	44	231	24	N
Fvb1:4196951-4197239	TE_homo_1511	Fvb1	4196951	4197239	289	216	78	0.634	.	AAUCGACUGUAUCAAACAAAUAAG	33	2	1	7	4	23	179	24	N
Fvb1:4296081-4296251	TE_homo_1529	Fvb1	4296081	4296251	171	22	17	0.591	.	AUUACAAUUUAGGAAGUGUGGAUU	4	1	0	1	1	1	18	24	N
Fvb1:4338401-4339062	TE_homo_1535	Fvb1	4338401	4339062	662	511	257	0.401	.	AAUACGGUGGGCCGGCCUGGACCC	40	25	12	25	13	53	383	24	N
Fvb1:4346392-4346923	TE_homo_1539	Fvb1	4346392	4346923	532	175	45	0.88	+	AGAUGGUCUUAGGACUGAAGGCCU	120	4	2	0	2	6	161	24	N
Fvb1:4383486-4383742	TE_homo_1546	Fvb1	4383486	4383742	257	61	28	0.754	.	AUUUAACAGAUUUAGUUCGUCUAU	20	2	0	1	1	10	47	24	N
Fvb1:4383495-4383779	TE_homo_1547	Fvb1	4383495	4383779	285	62	29	0.742	.	AUUUAACAGAUUUAGUUCGUCUAU	20	2	0	1	1	11	47	24	N
Fvb1:4495344-4495810	TE_struc_56	Fvb1	4495344	4495810	467	191	59	0.827	+	AUGAAGAUGGGUCAAACUUUGGAC	32	1	2	2	2	23	161	24	N
Fvb1:4500685-4501073	TE_struc_57	Fvb1	4500685	4501073	389	998	167	0.867	+	CACCCGUAGAACUGAUUUUAGAGG	225	5	17	17	6	98	855	24	N
Fvb1:4602901-4603040	TE_homo_1621	Fvb1	4602901	4603040	140	64	29	0.656	.	AUAUGUCAGUGAGAUUUGAACCCA	14	0	1	1	0	8	54	24	N
Fvb1:4603291-4603495	TE_homo_1622	Fvb1	4603291	4603495	205	119	78	0.319	.	AUGAGAGAAGGAAUAGAAUAGUAU	11	10	0	2	2	17	88	24	N
Fvb1:4605638-4605735	TE_homo_1625	Fvb1	4605638	4605735	98	196	69	0.857	+	AGAUCCGGACUAUAUAUAUAUAUA	41	8	5	5	4	58	116	24	N
Fvb1:4642901-4643130	TE_homo_1651	Fvb1	4642901	4643130	230	104	53	0.356	.	ACCCUUCAAUAGAACUAAACAUCU	11	0	0	5	1	21	77	24	N
Fvb1:4687557-4687947	TE_homo_1673	Fvb1	4687557	4687947	391	1258	234	0.167	-	CGAGAUCCAAAGACUGAUUUAGAU	190	24	10	20	23	108	1073	24	N
Fvb1:4697268-4697409	TE_homo_1676	Fvb1	4697268	4697409	142	165	46	0.145	-	AGAGUGGAUUACAAUUGAAGGAGU	33	5	2	4	2	40	112	24	N
Fvb1:4711256-4711467	TE_homo_1680	Fvb1	4711256	4711467	212	147	89	0.755	.	AGAAUGGUUAACGGAGAUCGGGGC	17	11	0	8	4	17	107	24	N
Fvb1:4736266-4736660	TE_homo_1681	Fvb1	4736266	4736660	395	1	1	0	-	AAAAUAGGUGAGAAAAUGAGAUUC	1	0	0	0	0	0	1	24	N
Fvb1:4831934-4832204	TE_homo_1731	Fvb1	4831934	4832204	271	71	56	0.211	.	AUUUUGAUGUUGGGGUACUAAUCU	4	2	0	3	0	17	49	24	N
Fvb1:4832245-4832612	TE_homo_1732	Fvb1	4832245	4832612	368	157	86	0.783	.	UUAGGUUUUUGGCACUGAUGGAGC	10	6	2	3	5	18	123	24	N
Fvb1:4833497-4834182	TE_homo_1733	Fvb1	4833497	4834182	686	151	96	0.371	.	AUUGGGCUCCACUGAAUUGGUCGG	17	10	5	6	2	21	107	24	N
Fvb1:4857543-4858043	TE_homo_1756	Fvb1	4857543	4858043	501	8	6	0.375	.	AUUGUAAUAUAGCUUAUUGUGGGA	2	1	0	0	0	2	5	24	N
Fvb1:4872391-4872594	TE_homo_1762	Fvb1	4872391	4872594	204	60	35	0.683	.	GAUGCUAACUUAAGUAUAGAACU	6	2	2	3	2	18	33	24	N
Fvb1:4895052-4895325	TE_homo_1779	Fvb1	4895052	4895325	274	56	26	0.482	.	UCUGCUGGAGCUCUUAUUCAUACU	7	1	0	9	2	2	42	24	N
Fvb1:4920008-4920443	TE_homo_1780	Fvb1	4920008	4920443	436	11	10	0.727	.	AGGAAUUCAAGAGGGUCUGGACCC	2	0	0	0	0	2	9	24	N
Fvb1:4924270-4924422	TE_homo_1785	Fvb1	4924270	4924422	153	261	130	0.284	.	AAAAAUUGGACUAAACUGAUGUGU	21	10	0	18	9	39	185	24	N
Fvb1:4924486-4924629	TE_homo_1786	Fvb1	4924486	4924629	144	498	210	0.775	.	AAGACUGAACUGAUUUUGCCACCA	29	17	9	59	33	105	275	24	N
Fvb1:4928115-4928460	TE_homo_1792	Fvb1	4928115	4928460	346	286	129	0.72	.	ACAGAUCUAAUGGUGUGAACUUAU	39	7	0	3	4	34	238	24	N
Fvb1:4958206-4958285	TE_homo_1798	Fvb1	4958206	4958285	80	67	20	0.358	.	ACAGAAUAUACUAGAACAAAUACU	29	0	1	1	3	4	58	24	N
Fvb1:4967045-4967297	TE_homo_1799	Fvb1	4967045	4967297	253	69	42	0.783	.	AAGAGGACGGAGACAAGGAAUCCU	11	2	1	6	1	5	54	24	N
Fvb1:4968551-4968697	TE_homo_1800	Fvb1	4968551	4968697	147	76	24	0.987	+	AAAGUAAUGUCAUUUGUAGAAACU	25	2	0	0	1	11	62	24	N
Fvb1:4973250-4973393	TE_homo_1801	Fvb1	4973250	4973393	144	87	43	0.448	.	ACUUAGAUUUUGUCUUUUAAUGAU	7	1	0	0	2	10	74	24	N
Fvb1:4977158-4977507	TE_homo_1807	Fvb1	4977158	4977507	350	15	14	0.467	.	AAUUUAGCUCAGGUGGUUUUAGAA	2	0	0	1	0	0	14	24	N
Fvb1:4977551-4977793	TE_homo_1808	Fvb1	4977551	4977793	243	45	22	0.422	.	ACUGUCUCUAGGCUGUAGCCCAGA	7	2	4	2	1	2	34	24	N
Fvb1:5009692-5010221	TE_homo_1828	Fvb1	5009692	5010221	530	8	7	1	+	AAUUUGGGGCUGAAAAUUUGACAG	2	0	0	0	0	3	5	24	N
Fvb1:5014005-5014166	TE_homo_1833	Fvb1	5014005	5014166	162	1	1	1	+	AUUUCCGCGCAGAAUGACCUUUGC	1	0	0	0	0	0	1	24	N
Fvb1:5067381-5067547	TE_homo_1851	Fvb1	5067381	5067547	167	7	7	0.714	.	AUUACGGUUCGGCUUUGGUGCGAU	1	0	0	0	0	1	6	24	N
Fvb1:5113517-5113809	TE_homo_1869	Fvb1	5113517	5113809	293	26	12	0.462	.	AAGGACCAUUUAGAUUAAAAUAAA	10	1	0	0	0	0	25	24	N
Fvb1:5120714-5120847	TE_homo_1872	Fvb1	5120714	5120847	134	1	1	0	-	AUGUGAAUUUUAACUCGGGGUGUU	1	0	0	0	0	0	1	24	N
Fvb1:5281570-5281684	TE_homo_1930	Fvb1	5281570	5281684	115	20	12	0.3	.	CUUGGUUGGUUAAGGUGCUUAACU	4	3	0	1	0	4	12	24	N
Fvb1:5321528-5321956	TE_homo_1944	Fvb1	5321528	5321956	429	1297	334	0.519	.	GUGAGGACCCUUAAGUUGAGGACU	112	34	9	33	17	224	980	24	N
Fvb1:5331515-5331671	TE_homo_1946	Fvb1	5331515	5331671	157	238	99	0.303	.	AUGUGUCAAUAAAUUAAAUAAGGA	42	5	4	2	3	45	179	24	N
Fvb1:5382134-5382253	TE_homo_1972	Fvb1	5382134	5382253	120	2	2	0	-	AGAUUGAGCUAUUUGGUAAGGCAA	1	0	0	0	0	0	2	24	N
Fvb1:5383962-5384124	TE_homo_1977	Fvb1	5383962	5384124	163	206	86	0.738	.	AAUGAGGACCUUAUAAUGAGGACU	23	23	1	3	2	28	149	24	N
Fvb1:5409331-5409574	TE_homo_1993	Fvb1	5409331	5409574	244	7	7	0.429	.	UUAAGGCCUCGUUUGGUUCAUGGA	1	0	0	0	2	1	4	24	N
Fvb1:5450257-5450650	TE_homo_2003	Fvb1	5450257	5450650	394	11	7	0.636	.	AAGGGACAAAACUGAUUUUAGGUG	4	0	0	1	1	2	7	24	N
Fvb1:5456195-5456302	TE_homo_2010	Fvb1	5456195	5456302	108	52	34	0.385	.	AAGAGGAAAUGAACACUGAGCUGU	4	5	1	0	0	8	38	24	N
Fvb1:5464484-5464877	TE_homo_2016	Fvb1	5464484	5464877	394	249	87	0.253	.	AUUUGUUGUUGUAGCCUUGGUGAC	78	7	3	5	2	22	210	24	N
Fvb1:5468860-5469162	TE_homo_2018	Fvb1	5468860	5469162	303	120	30	0.825	+	AGGAUUACAAGAAACACUCACUCU	58	0	0	1	4	11	104	24	N
Fvb1:5469163-5469557	TE_homo_2019	Fvb1	5469163	5469557	395	18	11	0.389	.	AUAGAGAGAGUUCGUGAUAGUUGU	4	1	0	0	0	1	16	24	N
Fvb1:5473372-5473484	TE_homo_2021	Fvb1	5473372	5473484	113	30	20	0.733	.	AUCGAUGAACUGUGGCUUGGUUGG	5	2	0	2	1	5	20	24	N
Fvb1:5494029-5494415	TE_homo_2026	Fvb1	5494029	5494415	387	842	214	0.504	.	ACGUGACAGUCUGACGUGGUCCUA	57	16	10	29	10	109	668	24	N
Fvb1:5495671-5495779	TE_homo_2028	Fvb1	5495671	5495779	109	2	2	0.5	.	AGAAUAAUUCUUUCUGUCAUUGGA	1	0	0	0	0	0	2	24	N
Fvb1:5524260-5524700	TE_homo_2034	Fvb1	5524260	5524700	441	35	24	0.686	.	AUUAUAAUCGGGAAGUUGGUGUAA	4	0	1	3	4	3	24	24	N
Fvb1:5525778-5525862	TE_homo_2037	Fvb1	5525778	5525862	85	9	9	0.556	.	AUGAUUAGUUAUUAUAAAAUGAUU	1	0	0	0	0	1	8	24	N
Fvb1:5562202-5562554	TE_homo_2047	Fvb1	5562202	5562554	353	389	214	0.491	.	AGGGCUUCUCUGCUACCGACGUCC	22	21	3	30	21	46	268	24	N
Fvb1:5613109-5613277	TE_homo_2059	Fvb1	5613109	5613277	169	46	20	0.826	+	AAAAUAUGAGCAAUCGUCAUGGAU	13	0	0	1	4	5	36	24	N
Fvb1:5614664-5614987	TE_homo_2060	Fvb1	5614664	5614987	324	164	103	0.494	.	AUUGGAUGACUGAGAUUAAGUAAA	9	5	3	2	5	30	119	24	N
Fvb1:5622723-5622905	TE_struc_62	Fvb1	5622723	5622905	183	2804	513	0.44	.	AUCCAACGGUGACUGACUAUGAAU	566	78	33	107	61	386	2139	24	N
Fvb1:5644650-5644731	TE_homo_2068	Fvb1	5644650	5644731	82	39	18	0.846	+	AUUUAACAACAAAUUUAGGGAUGU	18	2	0	3	0	0	34	24	N
Fvb1:5654929-5655099	TE_homo_2079	Fvb1	5654929	5655099	171	15	14	0.6	.	CCUAGAACCGAUUAAUCCCCGCCU	2	0	0	1	0	1	13	24	N
Fvb1:5671656-5672278	TE_homo_2095	Fvb1	5671656	5672278	623	81	58	0.42	.	AUAUCGUGUUACGGCGGAGCGGGU	7	6	1	0	5	9	60	24	N
Fvb1:5778787-5779172	TE_homo_2131	Fvb1	5778787	5779172	386	57	45	0.491	.	AUUCCAUCGAUGUGAGACUCAUGU	6	3	1	2	0	2	49	24	N
Fvb1:5781932-5782134	TE_homo_2133	Fvb1	5781932	5782134	203	6	6	0.333	.	AUUUCUUGAACCAAACGGGUU	1	0	0	1	0	0	5	24	N
Fvb1:5806407-5806725	TE_homo_2150	Fvb1	5806407	5806725	319	590	189	0.692	.	GCGGACAUCCGUAUCUGAAACGGA	159	15	4	82	33	52	404	24	N
Fvb1:5813724-5813894	TE_homo_2157	Fvb1	5813724	5813894	171	40	28	0.525	.	AAAAUAGAUGAGAAAUUGAAUCCU	5	1	1	0	2	2	34	24	N
Fvb1:5824277-5824427	TE_homo_2164	Fvb1	5824277	5824427	151	7	6	0.286	.	ACACUGUUGUGAACAGAUCCGGCU	2	0	0	0	1	0	6	24	N
Fvb1:5824795-5825201	TE_homo_2165	Fvb1	5824795	5825201	407	7	7	0.429	.	UCGCCUAAAACGAUCUUUGGUUAU	1	1	0	0	0	0	6	24	N
Fvb1:5829921-5830116	TE_homo_2170	Fvb1	5829921	5830116	196	1	1	0	-	AAUGUUAGGACAGAGCUAAACCCA	1	0	0	0	0	0	1	24	N
Fvb1:5830918-5831068	TE_homo_2171	Fvb1	5830918	5831068	151	7	5	0.286	.	AUCCGGCUUCUCUGUAAACAGAUU	2	1	0	0	0	1	5	24	N
Fvb1:5831436-5831842	TE_homo_2172	Fvb1	5831436	5831842	407	8	8	0.625	.	ACCAAAGAUCGUUUUAGGCGAACU	1	1	0	1	0	2	4	24	N
Fvb1:5836563-5836758	TE_homo_2177	Fvb1	5836563	5836758	196	1	1	0	-	GGGCAGAAUGUUAGGACAGAGCUU	1	0	0	0	0	0	1	24	N
Fvb1:5837559-5837709	TE_homo_2178	Fvb1	5837559	5837709	151	10	8	0.4	.	AUCCGGCUUCUCUGUAAACAGAUU	2	1	0	0	0	3	6	24	N
Fvb1:5838077-5838484	TE_homo_2179	Fvb1	5838077	5838484	408	10	10	0.5	.	UGUUAUAACCAAAGAUCGUUUUA	1	0	1	1	1	2	5	24	N
Fvb1:5878615-5878996	TE_homo_2199	Fvb1	5878615	5878996	382	333	165	0.565	.	GAACGGUGUAGGUUUGACAUAAGU	19	11	1	3	8	45	265	24	N
Fvb1:5884487-5884666	TE_struc_66	Fvb1	5884487	5884666	180	20	10	0.1	-	AGUGAGGACUUUCAAAUGAAUGGU	7	0	0	1	0	3	16	24	N
Fvb1:5891236-5891523	TE_homo_2200	Fvb1	5891236	5891523	288	38	26	0.447	.	UCGAAAUUUCAAAAUUGGGACUUU	4	0	0	3	2	5	28	24	N
Fvb1:5891634-5891764	TE_homo_2201	Fvb1	5891634	5891764	131	431	119	0.552	.	AAGUCCGGGCCUGGUUAGAAAGCA	72	17	0	13	6	35	360	24	N
Fvb1:5898274-5898613	TE_homo_2203	Fvb1	5898274	5898613	340	261	116	0.655	.	AUAAAUGUUAAGUUUUGAACGGUG	20	7	0	5	14	40	195	24	N
Fvb1:5898843-5898949	TE_homo_2204	Fvb1	5898843	5898949	107	2	1	1	+	AUAAAAGUGACUGCCUAUGACAAC	2	0	0	0	0	0	2	24	N
Fvb1:5937219-5937352	TE_homo_2225	Fvb1	5937219	5937352	134	274	84	0.628	.	ACUUAUGACCUCAACGUUGUUGGU	49	5	6	7	5	12	239	24	N
Fvb1:5940249-5940399	TE_homo_2226	Fvb1	5940249	5940399	151	524	136	0.653	.	AGACGGGAGAGCUUUUAAUGAGGA	106	13	10	7	5	41	448	24	N
Fvb1:5940409-5940790	TE_struc_68	Fvb1	5940409	5940790	382	635	228	0.518	.	AAUUCGAGGACCAAUAACUAUUCU	39	17	8	15	21	87	487	24	N
Fvb1:5948697-5948989	TE_struc_2	Fvb1	5948697	5948989	293	138	70	0.471	.	AGAUUCAUUCAAUUUUAAGUGGAA	11	4	1	4	1	21	107	24	N
Fvb1:5969981-5970083	TE_homo_2233	Fvb1	5969981	5970083	103	336	93	0.411	.	UGGCACUGUAUAGCUUCUUAGAGC	46	5	7	11	4	33	276	24	N
Fvb1:5990219-5990546	TE_homo_2234	Fvb1	5990219	5990546	328	39	33	0.462	.	AUAUUGUGAGACAUUUUUUUGGAU	3	3	0	1	2	5	28	24	N
Fvb1:5994538-5994957	TE_homo_2236	Fvb1	5994538	5994957	420	95	56	0.547	.	CUAAAUCAAAUCAAUGGACGAUU	9	2	2	3	4	13	71	24	N
Fvb1:5999862-5999989	TE_homo_2248	Fvb1	5999862	5999989	128	102	58	0.431	.	UCCCAUCGGAGAGAGCAAUAAACU	8	4	0	0	4	14	80	24	N
Fvb1:6000092-6000353	TE_struc_70	Fvb1	6000092	6000353	262	96	54	0.667	.	AUAGACGCAACUGAUAAAUGACCU	7	2	1	1	2	14	76	24	N
Fvb1:6004199-6004680	TE_struc_71	Fvb1	6004199	6004680	482	627	276	0.362	.	GGACUAACAUGAUGAUCGACCUA	41	32	3	21	39	132	400	24	N
Fvb1:6008762-6009077	TE_homo_2256	Fvb1	6008762	6009077	316	70	37	0.743	.	AUAAAUAGCAGUGACUGAUGGAGC	14	3	0	1	0	5	61	24	N
Fvb1:6010384-6010569	TE_homo_2261	Fvb1	6010384	6010569	186	37	27	0.432	.	ACGUCAGAUACUUACAUCAUGCCU	6	3	1	0	0	7	26	24	N
Fvb1:6010585-6010972	TE_struc_72	Fvb1	6010585	6010972	388	220	99	0.405	.	UUUAGACAUGUGGAUUUUUUACA	17	9	2	6	4	49	150	24	N
Fvb1:6051113-6051813	TE_homo_2269	Fvb1	6051113	6051813	701	468	205	0.63	.	ACUAACCGAGAACCAGAACCGAGG	78	9	7	23	9	70	350	24	N
Fvb1:6090021-6090114	TE_homo_2273	Fvb1	6090021	6090114	94	33	21	0.303	.	GAAAUAAAAUAAAAACACUUGGAC	6	2	2	1	3	1	24	24	N
Fvb1:6090102-6090184	TE_homo_2274	Fvb1	6090102	6090184	83	20	12	0.15	-	AGAUAAAAACACUUGGACUAAUAG	7	0	0	0	0	2	18	24	N
Fvb1:6090160-6090242	TE_homo_2275	Fvb1	6090160	6090242	83	12	9	0.333	.	CUUGAACCAAUAGACCAAUCAGAA	2	0	0	0	0	2	10	24	N
Fvb1:6090230-6090415	TE_homo_2276	Fvb1	6090230	6090415	186	167	81	0.509	.	AUGAUUGGCUAGAAACACC	14	18	6	4	1	28	110	24	N
Fvb1:6098397-6098812	TE_homo_2280	Fvb1	6098397	6098812	416	116	69	0.319	.	AUGUAGGGUGAGCAAAAUGGUUUG	11	6	0	5	4	18	83	24	N
Fvb1:6141996-6142164	TE_homo_2288	Fvb1	6141996	6142164	169	287	131	0.641	.	GAUUACAAUUUAGGGUGUGCGGAU	39	27	3	20	1	45	191	24	N
Fvb1:6146959-6147590	TE_struc_75	Fvb1	6146959	6147590	632	348	165	0.457	.	AUAGAAAGCCGUCAUGUAGUAUUU	16	11	3	16	12	33	273	24	N
Fvb1:6149392-6149524	TE_homo_2293	Fvb1	6149392	6149524	133	108	72	0.648	.	GCUGGUCACUGAUGGUCUGGUCGG	9	3	1	16	5	11	72	24	N
Fvb1:6155554-6156350	TE_struc_76	Fvb1	6155554	6156350	797	2086	468	0.547	.	AAAAAAUACCCGAACUUUGAAACU	86	61	35	44	42	308	1596	24	N
Fvb1:6156351-6156435	TE_homo_2299	Fvb1	6156351	6156435	85	8	8	0.5	.	GGAAAUAAAAUUUUGAGUAAACU	1	0	0	0	0	3	5	24	N
Fvb1:6169637-6169733	TE_homo_2301	Fvb1	6169637	6169733	97	511	130	0.63	.	UACAUAUGUCAGUGAGGUUUGAAC	84	31	7	20	13	66	374	24	N
Fvb1:6178085-6178450	TE_homo_2303	Fvb1	6178085	6178450	366	432	147	0.213	.	AGUGAGGACUCUUAAAUUAAGGAC	39	11	1	9	12	62	337	24	N
Fvb1:6208600-6209240	TE_struc_77	Fvb1	6208600	6209240	641	132	90	0.47	.	AUUAUCUAAUUACGGGUACAGGGA	6	5	1	3	4	19	100	24	N
Fvb1:6243881-6243983	TE_homo_2344	Fvb1	6243881	6243983	103	20	15	0.1	-	AGUAUGGAUUAUAAUUUAGAGAGU	4	0	1	0	0	4	15	24	N
Fvb1:6244704-6244789	TE_homo_2345	Fvb1	6244704	6244789	86	12	11	0.833	+	AUGAUGACUGAAAAUAAAAAAUA	2	0	0	0	0	3	9	24	N
Fvb1:6261115-6261601	TE_homo_2355	Fvb1	6261115	6261601	487	48	31	0.458	.	UUUUCGUACUUUAUAUCUCGGCCU	8	1	0	1	0	6	40	24	N
Fvb1:6266324-6266573	TE_homo_2356	Fvb1	6266324	6266573	250	139	106	0.475	.	AAUUUACAUAUUGAAACAAAGGGA	6	2	0	13	3	12	109	24	N
Fvb1:6266754-6266872	TE_homo_2357	Fvb1	6266754	6266872	119	26	16	0.769	.	AGGAGUGGAGGACAGAGAGGCGGA	6	0	0	0	1	2	23	24	N
Fvb1:6266873-6267119	TE_homo_2358	Fvb1	6266873	6267119	247	43	32	0.767	.	AGGAGUGGAGGACAGAGAGGCGGA	6	1	0	1	4	5	32	24	N
Fvb1:6268376-6268600	TE_homo_2359	Fvb1	6268376	6268600	225	66	38	0.515	.	ACUGAUUAGUAAGACAAAUAACU	9	1	0	2	2	14	47	24	N
Fvb1:6268948-6269141	TE_homo_2361	Fvb1	6268948	6269141	194	216	79	0.426	.	AGAUUCGGCCAUGUUUUUAGUUGA	20	4	4	4	5	25	174	24	N
Fvb1:6282531-6282861	TE_homo_2369	Fvb1	6282531	6282861	331	15	14	0.133	-	AGGACCAAUAUCUGAUUUGAAUGA	2	1	1	0	1	3	9	24	N
Fvb1:6295116-6295288	TE_homo_2371	Fvb1	6295116	6295288	173	449	142	0.684	.	AUGCAACGGUGAUUGAACAUGAUU	79	13	2	10	8	52	364	24	N
Fvb1:6347265-6347354	TE_homo_2381	Fvb1	6347265	6347354	90	178	75	0.32	.	AGCGUGUCGGACACGUGUCGGAGC	21	4	1	8	1	16	148	24	N
Fvb1:6386296-6386674	TE_homo_2398	Fvb1	6386296	6386674	379	127	84	0.181	-	AGGAGGAUCUGCGUCGUGGUUGGC	8	8	0	9	3	21	86	24	N
Fvb1:6386379-6386785	TE_homo_2399	Fvb1	6386379	6386785	407	177	97	0.424	.	AAGCCGGUCGCACGGACACGUGGC	18	9	2	7	5	20	134	24	N
Fvb1:6435960-6436376	TE_struc_79	Fvb1	6435960	6436376	417	394	151	0.594	.	AGGGAAUAUAGAGCUCUUUUUAGG	50	6	7	6	9	47	319	24	N
Fvb1:6437733-6437915	TE_homo_2403	Fvb1	6437733	6437915	183	313	115	0.208	.	AGUUACCGACCAACUGAUCAAGGA	57	7	2	7	2	37	258	24	N
Fvb1:6455352-6455524	TE_homo_2406	Fvb1	6455352	6455524	173	65	24	0.569	.	AUACCUGAGUUGAACUUUCAAAUU	15	0	1	0	3	5	56	24	N
Fvb1:6534383-6534631	TE_homo_2433	Fvb1	6534383	6534631	249	83	55	0.614	.	CAAAUUGAAAAUCGUUAAGGCGUU	5	4	2	2	1	20	54	24	N
Fvb1:6559085-6559206	TE_homo_2441	Fvb1	6559085	6559206	122	48	23	0.875	+	GAAGAAUAAUGUUGAUGUAAGAAC	17	1	0	0	2	5	40	24	N
Fvb1:6580480-6580668	TE_homo_2453	Fvb1	6580480	6580668	189	321	172	0.555	.	UGACGGAAAUUAGCCUCAGGCCU	17	10	7	13	8	65	218	24	N
Fvb1:6587050-6587463	TE_homo_2455	Fvb1	6587050	6587463	414	206	104	0.66	.	AAAUACGAGAGAGUCCGGACGAAU	33	12	6	5	4	28	151	24	N
Fvb1:6617155-6617466	TE_homo_2460	Fvb1	6617155	6617466	312	115	77	0.635	.	CUGGCGCCGGAGGGUGGAGAAC	11	6	0	14	19	15	61	24	N
Fvb1:6617259-6617515	TE_homo_2462	Fvb1	6617259	6617515	257	96	68	0.76	.	ACUCUGCUGGAGUGCUCUGGGGUG	9	5	0	10	7	15	59	24	N
Fvb1:6619071-6619175	TE_homo_2464	Fvb1	6619071	6619175	105	2845	553	0.702	.	AGGACCACAUCAGACUGCCACGUG	200	222	23	124	88	520	1868	24	N
Fvb1:6622584-6623066	TE_homo_2465	Fvb1	6622584	6623066	483	130	75	0.431	.	ACCGAAGCCGUUGGAACUGACAAG	13	3	1	2	5	20	99	24	N
Fvb1:6647148-6647266	TE_homo_2478	Fvb1	6647148	6647266	119	230	84	0.596	.	AUAUGUCCAUGAGGUUUGAACCCG	26	5	3	5	1	27	189	24	N
Fvb1:6675538-6675838	TE_homo_2485	Fvb1	6675538	6675838	301	605	269	0.696	.	AAGGACUAAACAGAGAUGUCGACU	65	27	14	22	20	103	419	24	N
Fvb1:6680310-6680760	TE_homo_2492	Fvb1	6680310	6680760	451	223	86	0.525	.	UGAUUUGGUGAUCGUUAAGACU	29	10	1	40	37	15	120	24	N
Fvb1:6718508-6718693	TE_homo_2500	Fvb1	6718508	6718693	186	24	13	0.542	.	AGUAUGGGUACCACUUUGACCGUG	4	0	0	1	0	5	18	24	N
Fvb1:6829668-6829934	TE_homo_2532	Fvb1	6829668	6829934	267	457	153	0.611	.	AAACAGAUCUAAUGGUGUGGGCAU	54	17	13	17	9	45	356	24	N
Fvb1:6864263-6864370	TE_homo_2544	Fvb1	6864263	6864370	108	3	3	0.667	.	AGCAUUUUAGCUCAUCGGUUGAAG	1	0	0	0	0	1	2	24	N
Fvb1:6896998-6897809	TE_struc_82	Fvb1	6896998	6897809	812	120	72	0.55	.	ACGGGACAGAUUUUUAAAAACACC	14	10	1	3	4	11	91	24	N
Fvb1:6994476-6994994	TE_homo_2626	Fvb1	6994476	6994994	519	137	41	0.861	+	AUCGAGAUCUUCGCAAUGAUUGUG	77	4	1	3	3	12	114	24	N
Fvb1:7000000-7000111	TE_homo_2629	Fvb1	7000000	7000111	112	23	16	0.304	.	AGGAUAUGUAAUGAAUGAAAAUUA	3	0	1	0	1	2	19	24	N
Fvb1:7097206-7097593	TE_homo_2664	Fvb1	7097206	7097593	388	57	47	0.421	.	GACCUAUAAGGCAUGAGGCAGGGA	3	3	1	4	1	5	43	24	N
Fvb1:7150344-7150460	TE_homo_2693	Fvb1	7150344	7150460	117	24	12	0.792	.	AGAAUUAAUUGAACUGGUAUGAUU	5	0	0	0	0	3	21	24	N
Fvb1:7150493-7150718	TE_homo_2694	Fvb1	7150493	7150718	226	36	25	0.333	.	AUUACAAAUCCGCGUUAUUAAAGA	5	1	0	0	1	7	27	24	N
Fvb1:7187111-7188035	TE_homo_2700	Fvb1	7187111	7188035	925	207	116	0.802	+	AAAAGAGUGCGGCUAUUAGGACCU	14	4	0	9	4	25	165	24	N
Fvb1:7252031-7252202	TE_struc_86	Fvb1	7252031	7252202	172	156	63	0.833	+	ACAGUCGGUUACUAACGCCUAGGC	42	10	0	8	8	21	109	24	N
Fvb1:7259300-7259470	TE_homo_2729	Fvb1	7259300	7259470	171	133	61	0.173	-	AAUUUGAGGAGUGUAGAUUUCACU	30	2	0	2	1	24	104	24	N
Fvb1:7266364-7266826	TE_homo_2735	Fvb1	7266364	7266826	463	66	46	0.439	.	AUCUCAUGAACAAAACAAAAGCCU	6	2	1	1	1	4	57	24	N
Fvb1:7271998-7272411	TE_struc_87	Fvb1	7271998	7272411	414	70	49	0.314	.	AACCAUUGGUGUCAGUGACGUAGC	4	4	1	3	4	12	46	24	N
Fvb1:7289467-7289558	TE_homo_2737	Fvb1	7289467	7289558	92	177	61	0.757	.	UUUUCGGUUUAUGGUUUAAAAGAC	20	3	0	5	1	27	141	24	N
Fvb1:7320547-7320938	TE_homo_2740	Fvb1	7320547	7320938	392	44	19	0.818	+	CACGUAACUCUUAAUCCUGGCUCC	25	1	0	3	0	2	38	24	N
Fvb1:7321783-7322030	TE_homo_2741	Fvb1	7321783	7322030	248	14	12	0.5	.	UUGAUGAAUUUCUUGAUUGCUGG	2	0	0	1	1	2	10	24	N
Fvb1:7322103-7322480	TE_homo_2742	Fvb1	7322103	7322480	378	202	69	0.455	.	AACGGAUGAGAUGUCAAAAUGUGA	31	14	3	4	2	15	164	24	N
Fvb1:7333915-7334102	TE_homo_2757	Fvb1	7333915	7334102	188	109	48	0.165	-	AUUUCGUUAGGGCUUAAAUAGGGC	40	2	0	5	1	8	93	24	N
Fvb1:7342636-7342813	TE_homo_2766	Fvb1	7342636	7342813	178	307	105	0.752	.	ACGGCGAUACAGUAAAACUCAAAC	64	13	9	7	12	47	219	24	N
Fvb1:7342849-7342970	TE_homo_2767	Fvb1	7342849	7342970	122	28	25	0.536	.	CUCUUUGUUUGUGUGCGACUGAGC	3	3	0	1	0	4	20	24	N
Fvb1:7369307-7369455	TE_homo_2775	Fvb1	7369307	7369455	149	18	14	0.222	.	AGUUGUCUAGGCUAGUUAGAAGCA	3	0	0	0	0	3	15	24	N
Fvb1:7371756-7371907	TE_homo_2778	Fvb1	7371756	7371907	152	209	87	0.388	.	AAAUUUAGAUCUAACGAUGGUUGA	22	1	1	5	3	21	178	24	N
Fvb1:7411091-7411221	TE_homo_2784	Fvb1	7411091	7411221	131	57	29	0.684	.	AACAAAUCGAGUUUGAACUAAGAU	9	2	0	2	1	8	44	24	N
Fvb1:7414657-7414895	TE_homo_2787	Fvb1	7414657	7414895	239	119	48	0.244	.	AGAAUGGAGGACCACGUCAGAAGC	12	1	1	0	1	17	99	24	N
Fvb1:7437032-7437166	TE_homo_2801	Fvb1	7437032	7437166	135	42	24	0.405	.	AACUGAUAACUUUGAGGUCAUGGG	7	0	0	0	1	7	34	24	N
Fvb1:7449385-7449509	TE_homo_2803	Fvb1	7449385	7449509	125	3	2	0	-	GUUUCAUGUUGUUAUCAUGGUGGA	2	0	0	0	0	0	3	24	N
Fvb1:7507666-7508052	TE_struc_89	Fvb1	7507666	7508052	387	45	32	0.844	+	AGGGACUAACAUGAAGUCACCCCC	8	1	2	6	0	5	31	24	N
Fvb1:7552331-7552569	TE_homo_2841	Fvb1	7552331	7552569	239	139	76	0.54	.	AUUUAGUGAAGUUUUUGAGGGCCU	11	8	9	3	6	17	96	24	N
Fvb1:7561732-7562151	TE_homo_2845	Fvb1	7561732	7562151	420	513	157	0.421	.	AGUUUUUAGGUUUAUAUGAGUAGA	44	3	6	6	3	66	429	24	N
Fvb1:7578185-7578704	TE_homo_2855	Fvb1	7578185	7578704	520	78	58	0.705	.	UCGGAGAAAUAUCUAUUGUAGUAA	6	1	1	1	0	9	66	24	N
Fvb1:7586540-7586957	TE_homo_2859	Fvb1	7586540	7586957	418	33	27	0.515	.	CCAAAAGGACGGGCUUUUAAGGCC	3	2	0	3	1	5	22	24	N
Fvb1:7601937-7602322	TE_struc_91	Fvb1	7601937	7602322	386	162	89	0.605	.	AAUUCAAACGGAAUAUGAGAAUUU	12	6	10	12	3	21	110	24	N
Fvb1:7634259-7635000	TE_homo_2866	Fvb1	7634259	7635000	742	324	178	0.639	.	CGGGACGAGAUAGGUUUUGAAAAU	23	16	7	10	9	36	246	24	N
Fvb1:7650431-7650620	TE_homo_2872	Fvb1	7650431	7650620	190	59	36	0.61	.	GAGAUAAUAUCGGUGUAAGAUUGA	13	0	3	0	0	9	47	24	N
Fvb1:7650617-7650880	TE_homo_2873	Fvb1	7650617	7650880	264	246	118	0.11	-	AAGAACCCUGAACUGGCUGAGAGA	17	4	2	10	5	17	208	24	N
Fvb1:7689049-7689458	TE_struc_93	Fvb1	7689049	7689458	410	507	162	0.72	.	ACGUGGCAGUCUGACGUGGUCCUA	96	15	11	16	13	70	382	24	N
Fvb1:7726346-7726863	TE_struc_94	Fvb1	7726346	7726863	518	5	5	0.2	.	UAGAACAUUUGGUAUGUAUGAACU	1	1	0	0	0	0	4	24	N
Fvb1:7730059-7730778	TE_struc_95	Fvb1	7730059	7730778	720	103	74	0.252	.	GGGACUUAGGCUGGACAAAAACCU	5	5	1	5	4	8	80	24	N
Fvb1:7731862-7732041	TE_homo_2935	Fvb1	7731862	7732041	180	5	5	0.4	.	GAAUGAAUCAUUUGAAUGAUGGAA	1	0	0	0	0	2	3	24	N
Fvb1:7745851-7746271	TE_homo_2943	Fvb1	7745851	7746271	421	661	179	0.331	.	AAUGAGGACUAGUUGAUGACUUUU	81	18	10	10	7	89	527	24	N
Fvb1:7750922-7751037	TE_homo_2945	Fvb1	7750922	7751037	116	33	16	0.667	.	AGGAAACCCAUAUGAAUAUUUGUA	11	0	0	1	1	3	28	24	N
Fvb1:7763212-7763324	TE_homo_2948	Fvb1	7763212	7763324	113	15	11	0.867	+	AAACACUAUAUUCGUCGGCUAUAG	2	2	1	2	1	1	8	24	N
Fvb1:7763396-7763751	TE_homo_2950	Fvb1	7763396	7763751	356	22	15	0.727	.	UUUAGGGUUUAAAAUUGGGGAUUU	4	0	0	0	2	1	19	24	N
Fvb1:7815366-7815812	TE_homo_2966	Fvb1	7815366	7815812	447	305	114	0.443	.	ACUAAAUCAAACUUUUGAAAGCCU	64	15	6	10	31	52	191	24	N
Fvb1:7815840-7816188	TE_homo_2968	Fvb1	7815840	7816188	349	197	120	0.609	.	AAGUCAAUCUAGCCGGAAAACUGC	11	15	5	14	7	16	140	24	N
Fvb1:7833391-7833502	TE_homo_2984	Fvb1	7833391	7833502	112	98	59	0.367	.	CCCAUGAUCAAUCGCAAUACGGAU	9	1	2	2	1	16	76	24	N
Fvb1:7833584-7833830	TE_homo_2985	Fvb1	7833584	7833830	247	159	85	0.553	.	CUUUGACCAUCGAUCGGGCCU	16	9	6	19	6	17	102	24	N
Fvb1:7866492-7866847	TE_homo_3002	Fvb1	7866492	7866847	356	5	5	0.6	.	UCUUUAUAUAGGCGAAGAUGGAUG	1	0	1	0	0	0	4	24	N
Fvb1:7866919-7867031	TE_homo_3003	Fvb1	7866919	7867031	113	187	68	0.342	.	AAUAUCGUCGGCUAAAGUUGCUGA	76	9	6	6	8	25	133	24	N
Fvb1:7867032-7867132	TE_homo_3006	Fvb1	7867032	7867132	101	31	18	0.71	.	UUAAAUACUAUAUUCGUCGGCUA	7	0	3	0	1	13	14	24	N
Fvb1:7904642-7905056	TE_homo_3031	Fvb1	7904642	7905056	415	5	3	0.6	.	CGUUUGGCCGAUGUGGGAUAUUAC	3	0	0	0	0	0	5	24	N
Fvb1:7935663-7935748	TE_homo_3050	Fvb1	7935663	7935748	86	3	1	1	+	ACGGGUAGAAUGCUGGGUUAUUUA	3	0	0	0	0	0	3	24	N
Fvb1:7940586-7941062	TE_struc_100	Fvb1	7940586	7941062	477	75	53	0.373	.	AUCCAAUUCCUUUGUCAAGUGAUG	5	1	3	2	3	8	58	24	N
Fvb1:7952912-7953332	TE_homo_3056	Fvb1	7952912	7953332	421	1242	341	0.606	.	CCUUAAGUUGAGGACUUGGUGAG	81	94	18	47	17	221	845	24	N
Fvb1:7963384-7963690	TE_homo_3061	Fvb1	7963384	7963690	307	567	241	0.513	.	AAAACUGGAUUUCGGCGGACUCGC	52	29	10	24	22	62	420	24	N
Fvb1:7964494-7964830	TE_homo_3063	Fvb1	7964494	7964830	337	186	88	0.511	.	AUUUUGUGAUCGAAAAGUUCGUCA	13	8	5	8	3	27	135	24	N
Fvb1:7977403-7977574	TE_homo_3064	Fvb1	7977403	7977574	172	469	158	0.633	.	AGAAAAGUGAGAGUAUGGAUUACA	31	19	7	15	13	82	333	24	N
Fvb1:8056116-8056510	TE_homo_3074	Fvb1	8056116	8056510	395	13	10	0.308	.	UUAGAACAAUGUGCAUGAUAACAU	3	0	0	0	2	1	10	24	N
Fvb1:8100628-8100740	TE_homo_3097	Fvb1	8100628	8100740	113	21	15	0.286	.	AUAACUGAUCCCGAAGGUCCCGGA	4	3	0	0	0	2	16	24	N
Fvb1:8111254-8111648	TE_homo_3099	Fvb1	8111254	8111648	395	2021	301	0.541	.	AUUGGAACGUAGGACCACGUCAGA	224	70	46	38	44	243	1580	24	N
Fvb1:8121261-8121649	TE_struc_103	Fvb1	8121261	8121649	389	1210	336	0.461	.	UCUGACAUGGUCCUACAUUCCAAU	64	40	22	38	40	174	896	24	N
Fvb1:8121262-8121648	TE_struc_104	Fvb1	8121262	8121648	387	1210	336	0.461	.	UCUGACAUGGUCCUACAUUCCAAU	64	40	22	38	40	174	896	24	N
Fvb1:8124647-8125539	TE_struc_105	Fvb1	8124647	8125539	893	104	55	0.538	.	GUGGAGGUACACUGAGCAAAUCUG	10	2	2	1	0	17	82	24	N
Fvb1:8128763-8129135	TE_homo_3120	Fvb1	8128763	8129135	373	35	30	0.486	.	AGUGAGCCACUUAUUAGUCUGUUG	4	0	0	0	1	6	28	24	N
Fvb1:8141270-8141643	TE_homo_3126	Fvb1	8141270	8141643	374	102	43	0.775	.	AGAGAAUAGUGAUGUAGAAAGAUU	41	1	0	1	4	12	84	24	N
Fvb1:8165799-8166309	TE_homo_3135	Fvb1	8165799	8166309	511	369	200	0.412	.	ACAGAACACGUGAUGCGUUAGCUA	20	18	6	14	8	54	269	24	N
Fvb1:8179710-8179978	TE_homo_3137	Fvb1	8179710	8179978	269	29	14	0.345	.	AUUCGUCCGUGGCUGGAACAGGCA	9	1	1	2	1	5	19	24	N
Fvb1:8203110-8203452	TE_homo_3161	Fvb1	8203110	8203452	343	110	46	0.273	.	AAACAGAUCUAAUGGUAUGGACCU	26	2	1	6	1	8	92	24	N
Fvb1:8295397-8295525	TE_homo_3190	Fvb1	8295397	8295525	129	18	12	0.444	.	AACACCUUUUUGUUGUUGUGGGGA	5	0	1	3	0	1	13	24	N
Fvb1:8296259-8296592	TE_homo_3195	Fvb1	8296259	8296592	334	7	5	0.571	.	UCUUCUGGUAGUGUUGAUAGGAGC	2	0	0	1	2	0	4	24	N
Fvb1:8298440-8298544	TE_homo_3200	Fvb1	8298440	8298544	105	25	9	0.88	+	AUUUAAAUACUAUAUUCGUCGGCU	17	1	1	1	0	2	20	24	N
Fvb1:8299132-8299527	TE_homo_3204	Fvb1	8299132	8299527	396	21	13	0.762	.	CCCAAAUUCGAAGUAUAAGUAGGC	4	1	2	0	1	2	15	24	N
Fvb1:8299563-8299943	TE_homo_3205	Fvb1	8299563	8299943	381	26	17	0.385	.	CAACCCGGACAAGGAAGCAAGAGU	7	0	0	3	0	2	21	24	N
Fvb1:8348323-8348769	TE_homo_3248	Fvb1	8348323	8348769	447	402	192	0.714	.	AAGGAUCCCUCAAUAGAAAGGGGC	28	35	13	17	10	45	282	24	N
Fvb1:8353153-8353465	TE_homo_3254	Fvb1	8353153	8353465	313	136	71	0.154	-	CACGUGGACAAGAGAUGAGAGAAA	20	2	3	2	3	33	93	24	N
Fvb1:8370878-8371510	TE_homo_3268	Fvb1	8370878	8371510	633	411	171	0.311	.	AUAGCCCUUUGGCUAGCUCGGGCC	109	14	0	18	10	56	313	24	N
Fvb1:8374753-8375166	TE_homo_3280	Fvb1	8374753	8375166	414	520	243	0.637	.	UGCCGGAAACAAAACCGUGAGGGC	39	41	17	21	19	37	385	24	N
Fvb1:8378577-8378951	TE_homo_3287	Fvb1	8378577	8378951	375	92	49	0.576	.	UCUUUGUCCGGGUUGUGUAUGAUC	15	8	0	1	2	8	73	24	N
Fvb1:8380578-8380746	TE_homo_3290	Fvb1	8380578	8380746	169	1	1	0	-	CAUAAAAAUUUCGGCGCAUAAUGA	1	0	0	0	0	0	1	24	N
Fvb1:8388500-8389062	TE_homo_3301	Fvb1	8388500	8389062	563	24	18	0.375	.	AUCGGUGACGGAGCCAUGAUGAAA	3	1	1	0	0	1	21	24	N
Fvb1:8413948-8414046	TE_homo_3307	Fvb1	8413948	8414046	99	408	124	0.27	.	AUGUCCGUGAGGUUUGAACCAAUA	69	13	9	12	5	52	317	24	N
Fvb1:8433493-8433774	TE_homo_3313	Fvb1	8433493	8433774	282	245	72	0.869	+	AUUUGGGUGAAAAUUUGUAGAAAU	36	8	2	2	7	64	162	24	N
Fvb1:8438365-8438447	TE_homo_3319	Fvb1	8438365	8438447	83	34	19	0.412	.	AGUAAAAGUCAAUGUUUCAAACGA	8	3	0	0	1	2	28	24	N
Fvb1:8439096-8439417	TE_homo_3321	Fvb1	8439096	8439417	322	72	41	0.486	.	AAGUAGCUUGUAUCGCUCAACCCU	18	4	2	3	0	4	59	24	N
Fvb1:8439639-8439860	TE_homo_3324	Fvb1	8439639	8439860	222	120	71	0.475	.	UAUAGAAUUCGCUGCAAACAUAGG	10	8	2	2	2	14	92	24	N
Fvb1:8442009-8442171	TE_homo_3326	Fvb1	8442009	8442171	163	50	33	0.38	.	AUGAUUGUAUCUCUAUAUAAACCU	13	2	0	0	0	10	38	24	N
Fvb1:8443968-8444106	TE_homo_3329	Fvb1	8443968	8444106	139	113	65	0.381	.	AGAAGGGUCAAGACUUAAGUGGCU	14	4	1	1	2	13	92	24	N
Fvb1:8466123-8466556	TE_homo_3341	Fvb1	8466123	8466556	434	49	31	0.306	.	AUAUGAAAUUUUGUAGAGGUGAUC	12	0	2	3	3	7	34	24	N
Fvb1:8489961-8490494	TE_homo_3354	Fvb1	8489961	8490494	534	75	47	0.427	.	AUGAGGAUCCCCAGUAUUCGGAUU	7	4	0	0	1	8	62	24	N
Fvb1:8491392-8491702	TE_homo_3356	Fvb1	8491392	8491702	311	59	49	0.576	.	CGAGUCGAACACAAUUCUAAACU	3	2	1	3	2	10	41	24	N
Fvb1:8504694-8505080	TE_struc_111	Fvb1	8504694	8505080	387	85	48	0.353	.	ACGGAAUAUGAGAAUUUGGGCACU	12	1	4	3	4	12	61	24	N
Fvb1:8507193-8507492	TE_homo_3370	Fvb1	8507193	8507492	300	85	46	0.706	.	ACUGAGAAAAUUGUCGGAUUGACU	8	3	2	2	4	15	59	24	N
Fvb1:8508595-8508865	TE_homo_3376	Fvb1	8508595	8508865	271	135	59	0.667	.	AAACUGGAAUUCGGCGGACUCACC	34	1	2	24	9	15	84	24	N
Fvb1:8508808-8508907	TE_homo_3377	Fvb1	8508808	8508907	100	6	3	0	-	CUCUGGACGGUGGCGAACGGAGCU	4	0	0	0	0	1	5	24	N
Fvb1:8584108-8584433	TE_homo_3444	Fvb1	8584108	8584433	326	546	133	0.815	+	AGUCCUUGUGGUUUGAAGUCGACA	265	12	4	11	14	38	467	24	N
Fvb1:8584434-8584614	TE_homo_3445	Fvb1	8584434	8584614	181	251	74	0.944	+	CCUGAGAAAAUUGUCGGAAUGACU	59	23	3	5	4	70	146	24	N
Fvb1:8663560-8663713	TE_homo_3510	Fvb1	8663560	8663713	154	1	1	0	-	AUUUUCCCUGAUUGUUCACUCCAA	1	0	0	0	0	0	1	24	N
Fvb1:8686371-8686555	TE_homo_3539	Fvb1	8686371	8686555	185	275	109	0.48	.	CGAGAUCUAUUGUGAUUAAAACUC	31	3	4	7	6	37	218	24	N
Fvb1:8718456-8718883	TE_homo_3561	Fvb1	8718456	8718883	428	190	71	0.832	+	AGGGAAUAUAGAGCUGUUUUUAGG	91	6	2	1	3	11	167	24	N
Fvb1:8718887-8719407	TE_homo_3562	Fvb1	8718887	8719407	521	135	70	0.533	.	AUAUAUUCGAUAUGGAGCUCAUAU	13	4	5	3	6	19	98	24	N
Fvb1:8724673-8724785	TE_homo_3566	Fvb1	8724673	8724785	113	120	40	0.2	.	ACCAACAGAUCGUUGCCGACUAGU	47	2	2	2	2	4	108	24	N
Fvb1:8724871-8725130	TE_homo_3567	Fvb1	8724871	8725130	260	45	33	0.422	.	UCUUGGGCUUUGACCAUUUGGCCU	10	3	0	0	0	4	38	24	N
Fvb1:8736560-8736698	TE_homo_3584	Fvb1	8736560	8736698	139	134	57	0.754	.	AUACAUUGAACUGACUUAGGCAUC	37	6	1	4	3	7	113	24	N
Fvb1:8742274-8742542	TE_homo_3585	Fvb1	8742274	8742542	269	7	7	0.571	.	ACUGUUGGAGAUGCUCUUAGAGUU	1	0	1	0	0	0	6	24	N
Fvb1:8761010-8761336	TE_homo_3591	Fvb1	8761010	8761336	327	104	59	0.519	.	AUUGGAAUGCAUGACCACGUCAUA	21	1	0	5	2	13	83	24	N
Fvb1:8767614-8767907	TE_homo_3594	Fvb1	8767614	8767907	294	5	5	0	-	CCUUUGGUAGAAUCCCACGUGAGU	1	0	0	0	0	0	5	24	N
Fvb1:8772342-8772667	TE_homo_3600	Fvb1	8772342	8772667	326	88	46	0.625	.	AUUGGAAUGCAUGACCACGUCAUA	22	0	1	7	1	14	65	24	N
Fvb1:8778947-8779240	TE_homo_3604	Fvb1	8778947	8779240	294	5	5	0.6	.	UUUGGUAGAAUCCCACGUGAGUGU	1	0	0	0	0	1	4	24	N
Fvb1:8801921-8802072	TE_homo_3623	Fvb1	8801921	8802072	152	65	25	0.908	+	AAUUUCAAUUUGGAGUAUGCGGAU	30	3	0	1	0	4	57	24	N
Fvb1:8813083-8813642	TE_struc_116	Fvb1	8813083	8813642	560	228	77	0.237	.	AACUGUGUUGAUUUAUGGGACAUA	61	2	1	4	2	36	183	24	N
Fvb1:8865539-8865935	TE_homo_3648	Fvb1	8865539	8865935	397	669	280	0.55	.	AAUGAGGACCCUUAAGUUGAGGAU	50	22	6	18	11	105	507	24	N
Fvb1:8889827-8890281	TE_homo_3667	Fvb1	8889827	8890281	455	284	80	0.299	.	CAAGUCUAUUUUAAAAUUCUGGCU	31	4	4	5	2	25	244	24	N
Fvb1:8890807-8890976	TE_homo_3668	Fvb1	8890807	8890976	170	152	71	0.25	.	AGUGUGGAUUAUAAUUUAAGAAGU	33	1	1	6	2	18	124	24	N
Fvb1:8896365-8896471	TE_homo_3670	Fvb1	8896365	8896471	107	6	4	0	-	ACAAGUAAAGAAUGGUCGGCUGCU	3	0	1	0	0	1	4	24	N
Fvb1:8966188-8966369	TE_struc_117	Fvb1	8966188	8966369	182	9	9	0.333	.	CGCUACUGGUGCUUAGUCGGUGCC	1	0	0	0	1	0	8	24	N
Fvb1:9001198-9001381	TE_homo_3694	Fvb1	9001198	9001381	184	105	57	0.552	.	AUCCAACGGUAAAUGAACAUGAUU	9	0	0	2	1	22	80	24	N
Fvb1:9038476-9038789	TE_homo_3713	Fvb1	9038476	9038789	314	700	157	0.437	.	UAAUGGGCUUGGAUGACUGAGAUU	61	13	28	8	16	75	560	24	N
Fvb1:9038831-9039273	TE_homo_3716	Fvb1	9038831	9039273	443	345	24	0.983	+	ACUAAAUUGAACUUUUGAAAGCCU	320	1	1	5	3	3	332	24	N
Fvb1:9057077-9057213	TE_homo_3722	Fvb1	9057077	9057213	137	102	50	0.676	.	AUAGGCCCGGACUUGAUAGGAGUC	23	11	3	6	2	4	76	24	N
Fvb1:9057326-9057611	TE_homo_3723	Fvb1	9057326	9057611	286	375	70	0.091	-	AGACCCGGACCUGAGAUUUUGAGG	199	3	2	4	3	26	337	24	N
Fvb1:9073517-9073845	TE_homo_3730	Fvb1	9073517	9073845	329	271	118	0.79	.	CAAAACUAAACAAAUGUCGACU	22	23	4	11	27	39	167	24	N
Fvb1:9088009-9088167	TE_homo_3733	Fvb1	9088009	9088167	159	165	46	0.891	+	AAGGUGUUUGAGAAUGUUGAGAAA	44	5	1	0	1	24	134	24	N
Fvb1:9088886-9089185	TE_homo_3735	Fvb1	9088886	9089185	300	65	51	0.446	.	CAAACAAAGAAAAUGAACAACUU	5	5	2	2	2	16	38	24	N
Fvb1:9090921-9091404	TE_struc_119	Fvb1	9090921	9091404	484	153	80	0.438	.	AUCCAAUUCCUCCGUCAAGUGAUG	26	3	6	2	0	32	110	24	N
Fvb1:9092138-9092482	TE_homo_3739	Fvb1	9092138	9092482	345	158	74	0.506	.	AUUAGAAUGUAGGACCACGUCAUA	15	2	4	4	5	13	130	24	N
Fvb1:9192807-9193420	TE_homo_3774	Fvb1	9192807	9193420	614	94	47	0.426	.	ACUAAAAGUAUGUAUGUUGGUUGA	10	2	1	0	1	16	74	24	N
Fvb1:9209976-9210116	TE_homo_3776	Fvb1	9209976	9210116	141	635	142	0.37	.	CCUGAGAUUUUUAGACCUGAGUCG	63	9	12	31	9	97	477	24	N
Fvb1:9224347-9224451	TE_homo_3783	Fvb1	9224347	9224451	105	13	10	0.462	.	UAAUGAAUUUGGAUGACUGAGAUU	3	1	1	0	0	4	7	24	N
Fvb1:9237070-9237220	TE_homo_3791	Fvb1	9237070	9237220	151	55	31	0.545	.	AAAAGUGUGGAUUACAAUUUGGGA	10	5	0	3	3	6	38	24	N
Fvb1:9240963-9241448	TE_struc_120	Fvb1	9240963	9241448	486	608	308	0.669	.	UUGAUGAGGAUAAACUGAAAUUAG	22	19	10	19	16	108	436	24	N
Fvb1:9286196-9286752	TE_struc_121	Fvb1	9286196	9286752	557	12	12	0.5	.	UCAGGGGCGGAUCUAUGUCUAAAGCU	1	0	1	1	0	3	7	24	N
Fvb1:9313910-9314016	TE_homo_3818	Fvb1	9313910	9314016	107	169	98	0.621	.	ACGCGGACUUUUGACUUUUUCAAA	8	12	0	7	4	21	125	24	N
Fvb1:9336236-9336316	TE_homo_3825	Fvb1	9336236	9336316	81	8	6	0.75	.	AGCGUAAUCACAAUAGUAGAAGGC	2	0	0	1	0	1	6	24	N
Fvb1:9365586-9365689	TE_homo_3832	Fvb1	9365586	9365689	104	446	86	0.791	.	CACCCGGGUGCGCUGUAUAAUUUU	116	5	6	6	7	47	375	24	N
Fvb1:9389696-9389883	TE_homo_3852	Fvb1	9389696	9389883	188	20	17	0.5	.	CAAAAGUUGGGGUACCGGUGCUA	3	0	0	1	0	6	13	24	N
Fvb1:9412809-9413144	TE_homo_3866	Fvb1	9412809	9413144	336	90	25	0.089	-	AGAAGGGUCAAGACUUAAAAAACU	40	0	2	1	0	3	84	24	N
Fvb1:9440131-9440528	TE_homo_3877	Fvb1	9440131	9440528	398	921	321	0.383	.	AGACCUAAAAACAGAACGGAUGAG	52	24	19	37	25	128	688	24	N
Fvb1:9475613-9476029	TE_homo_3882	Fvb1	9475613	9476029	417	455	227	0.747	.	AUUGGGACCUCUAGAUUUACUCAG	31	27	5	21	10	73	319	24	N
Fvb1:9476013-9476586	TE_homo_3883	Fvb1	9476013	9476586	574	237	139	0.544	.	UUGAGGUUGCAGAAGAGGUUUUC	13	8	0	7	5	73	144	24	N
Fvb1:9486193-9486395	TE_homo_3886	Fvb1	9486193	9486395	203	163	96	0.656	.	AAGUAGAGUAGAACUAGGAGUGGU	16	14	3	4	4	14	124	24	N
Fvb1:9487020-9487129	TE_homo_3887	Fvb1	9487020	9487129	110	31	24	0.419	.	GUUUGAACUUUGAACUCAUGACCU	6	2	2	0	0	3	24	24	N
Fvb1:9535042-9535204	TE_homo_3916	Fvb1	9535042	9535204	163	45	29	0.644	.	ACUCACUGUCUGGUUCGUCCGGAG	9	2	2	2	1	1	37	24	N
Fvb1:9536912-9537226	TE_homo_3920	Fvb1	9536912	9537226	315	90	58	0.856	+	AAAACCAAGCUGUUAUGAGACUCG	10	4	0	0	5	14	67	24	N
Fvb1:9537262-9537646	TE_homo_3921	Fvb1	9537262	9537646	385	130	78	0.815	+	CUAUUGGCUCUAGGGUUAGAACAA	8	4	1	11	8	17	89	24	N
Fvb1:9539297-9539813	TE_homo_3924	Fvb1	9539297	9539813	517	234	150	0.402	.	UCUUUAUGGAUGAAACUGUCAUGG	13	5	2	6	5	25	191	24	N
Fvb1:9540050-9540219	TE_homo_3925	Fvb1	9540050	9540219	170	63	39	0.19	-	AUUCAAGAACUAAAGAUGUAAACU	14	1	0	3	2	8	49	24	N
Fvb1:9551536-9551917	TE_homo_3932	Fvb1	9551536	9551917	382	2653	441	0.363	.	AUGAGGAUAUUUAAGUUGAGGACU	672	117	29	86	26	277	2118	24	N
Fvb1:9562748-9562931	TE_homo_3933	Fvb1	9562748	9562931	184	46	29	0.565	.	ACCAUCGAAUGUAAAGUGAAGAGG	8	1	1	1	0	5	38	24	N
Fvb1:9573140-9573238	TE_homo_3938	Fvb1	9573140	9573238	99	7	6	0.143	-	UUCGAGAUGCUCUAACUGAAUUUU	2	0	0	1	0	0	6	24	N
Fvb1:9573239-9573655	TE_struc_124	Fvb1	9573239	9573655	417	53	42	0.377	.	AGCUGUUGGAUUUUAAGCAUAAUU	3	2	2	3	2	5	39	24	N
Fvb1:9573656-9574285	TE_homo_3939	Fvb1	9573656	9574285	630	9	4	0.111	-	AAUACUUGUUGGAUACGAUUGCCU	6	0	0	0	0	0	9	24	N
Fvb1:9599379-9599553	TE_homo_3961	Fvb1	9599379	9599553	175	53	24	0.132	-	AGAGAAUAUCCUAGAACAUGUAGA	20	1	0	3	1	6	42	24	N
Fvb1:9626922-9627024	TE_homo_3969	Fvb1	9626922	9627024	103	1	1	0	-	ACAUGUUUUUUUAAAUUUUAGAGA	1	0	0	0	0	0	1	24	N
Fvb1:9657556-9657925	TE_homo_3995	Fvb1	9657556	9657925	370	221	79	0.647	.	AAUUCAUGUUUGGAUAAAGAAAUG	81	2	0	5	6	22	186	24	N
Fvb1:9657641-9657961	TE_homo_3996	Fvb1	9657641	9657961	321	203	71	0.7	.	AAUUCAUGUUUGGAUAAAGAAAUG	81	2	0	6	6	20	169	24	N
Fvb1:9657679-9657976	TE_homo_3997	Fvb1	9657679	9657976	298	201	69	0.706	.	AAUUCAUGUUUGGAUAAAGAAAUG	81	1	0	6	6	21	167	24	N
Fvb1:9675314-9675716	TE_homo_4006	Fvb1	9675314	9675716	403	892	258	0.76	.	AGACCUAAAAACUGAACGGAUGAG	162	23	12	24	17	98	718	24	N
Fvb1:9698079-9698188	TE_homo_4013	Fvb1	9698079	9698188	110	67	25	0.821	+	AACGAGAUCAGAAUGUUUGACACC	24	1	1	3	3	7	52	24	N
Fvb1:9698260-9698356	TE_homo_4014	Fvb1	9698260	9698356	97	103	47	0.583	.	ACGAGACCGGAAUGCUUAGCACCC	25	2	1	2	3	22	73	24	N
Fvb1:9699270-9699532	TE_homo_4016	Fvb1	9699270	9699532	263	332	141	0.539	.	AUAAGAACUAUUUGGAUAAAAAAU	19	1	4	4	9	39	275	24	N
Fvb1:9702180-9702473	TE_homo_4017	Fvb1	9702180	9702473	294	251	98	0.813	+	AGGUAUACUGUUGGAGCUCCUAUU	36	6	5	20	7	54	159	24	N
Fvb1:9726256-9726941	TE_struc_125	Fvb1	9726256	9726941	686	284	170	0.342	.	AACUGAACCGAACCGACAUAUAUU	13	10	10	14	11	32	207	24	N
Fvb1:9741454-9741557	TE_homo_4024	Fvb1	9741454	9741557	104	135	55	0.422	.	AUAAGUUUAAACCUCACGGACAUA	15	3	0	0	1	22	109	24	N
Fvb1:9744469-9744656	TE_homo_4027	Fvb1	9744469	9744656	188	42	31	0.31	.	CCAAAAAAGAUCUCGGUAUAAUU	3	0	2	0	3	7	30	24	N
Fvb1:9745096-9745276	TE_homo_4029	Fvb1	9745096	9745276	181	364	107	0.184	-	AGUCUCGGUACAAUUGAAUAUGAU	189	11	4	20	6	23	300	24	N
Fvb1:9745541-9745977	TE_homo_4030	Fvb1	9745541	9745977	437	189	110	0.672	.	AUCCGGACUAAUACACUAUUCAUC	19	3	5	6	5	17	153	24	N
Fvb1:9747675-9747805	TE_homo_4032	Fvb1	9747675	9747805	131	51	31	0.431	.	AGGACCAAUUGAAGACUUUUAAAU	8	4	0	2	0	3	42	24	N
Fvb1:9790633-9790863	TE_homo_4046	Fvb1	9790633	9790863	231	204	79	0.721	.	AUAGAGUUUGCUGUAAAUAUGAGG	45	5	3	6	1	21	168	24	N
Fvb1:9810392-9810579	TE_homo_4050	Fvb1	9810392	9810579	188	310	127	0.468	.	UAUGAUCGUGCCAAGCUCGUGCCU	48	12	4	7	10	42	235	24	N
Fvb1:9817332-9817493	TE_homo_4052	Fvb1	9817332	9817493	162	18	15	0.667	.	UAAUCAUGAAACAAAUUUAAGUGA	2	1	1	0	0	3	13	24	N
Fvb1:9854232-9854598	TE_homo_4056	Fvb1	9854232	9854598	367	1415	373	0.712	.	AACGAGGACAUUUAUAACAAAGAC	309	31	16	32	20	215	1101	24	N
Fvb1:9878544-9878723	TE_homo_4063	Fvb1	9878544	9878723	180	13264	1149	0.602	.	CGAGGACUUUCAAAUGAAUGGUU	3514	533	172	415	290	4865	6989	24	N
Fvb1:9895319-9895764	TE_homo_4070	Fvb1	9895319	9895764	446	492	92	0.691	.	AGACUUUCAAAAGUUUGAUUUAGU	128	3	2	78	21	36	352	24	N
Fvb1:9908332-9908765	TE_homo_4085	Fvb1	9908332	9908765	434	123	52	0.561	.	AUAUGAAAUUUUGUAGAGGUGAUC	21	2	1	3	3	14	100	24	N
Fvb1:9914357-9914436	TE_homo_4090	Fvb1	9914357	9914436	80	20	13	0.4	.	AACAUAUGGGGUAGCAAUAGACGC	5	0	0	0	0	4	16	24	N
Fvb1:9920342-9920727	TE_struc_131	Fvb1	9920342	9920727	386	145	54	0.779	.	AUUUGAGAGUACAAGGACCAACGU	34	5	2	4	1	16	117	24	N
Fvb1:9970562-9970986	TE_homo_4104	Fvb1	9970562	9970986	425	50	40	0.28	.	AAAGUUUCUCGUAUUGUAAAGAUU	4	3	0	1	3	2	41	24	N
Fvb1:9995415-9995825	TE_homo_4110	Fvb1	9995415	9995825	411	251	116	0.598	.	AGUGAUCGAGGACAUCUAUAAUGA	21	9	2	8	3	35	194	24	N
Fvb1:10004383-10004706	TE_homo_4121	Fvb1	10004383	10004706	324	59	47	0.356	.	CUAGAGCCAAUAGCCCACCU	3	7	4	6	4	4	34	24	N
Fvb1:10025257-10025642	TE_homo_4143	Fvb1	10025257	10025642	386	39	25	0.538	.	UAGGACAUUUGGUCACGCUUGAGG	5	2	1	3	1	4	28	24	N
Fvb1:10038427-10038775	TE_homo_4159	Fvb1	10038427	10038775	349	89	52	0.798	.	ACUGGGGAUAGGACUCAUCAUGGG	11	3	0	7	1	9	69	24	N
Fvb1:10047028-10047206	TE_homo_4165	Fvb1	10047028	10047206	179	338	89	0.843	+	AUACGAGAGUGUAGAUUGCAACAU	76	8	1	27	7	45	250	24	N
Fvb1:10053137-10053431	TE_homo_4167	Fvb1	10053137	10053431	295	662	176	0.734	.	AAGGACCAUUUAGAUUAAAAUAAA	176	8	8	12	13	87	534	24	N
Fvb1:10063033-10063435	TE_homo_4172	Fvb1	10063033	10063435	403	167	100	0.629	.	AUGUAAAUAACAGAGAGCCCGGAC	10	5	4	4	4	23	127	24	N
Fvb1:10068132-10068573	TE_homo_4178	Fvb1	10068132	10068573	442	147	79	0.633	.	UAUAGACCUAAGAUAUGAACGG	12	3	2	12	23	15	92	24	N
Fvb1:10078666-10078964	TE_homo_4181	Fvb1	10078666	10078964	299	152	64	0.145	-	ACCCAAGGACUGAAAAAUCGAAUU	72	3	4	4	6	10	125	24	N
Fvb1:10088607-10088832	TE_homo_4184	Fvb1	10088607	10088832	226	31	22	0.419	.	AACAAAUUCCCUACUGUAGAGAUU	7	0	0	0	0	4	27	24	N
Fvb1:10101182-10101381	TE_homo_4186	Fvb1	10101182	10101381	200	11	11	0.727	.	GCCACGAAGUCACCACAUGAAGAAC	1	0	1	0	0	4	6	24	N
Fvb1:10114309-10114699	TE_homo_4194	Fvb1	10114309	10114699	391	454	161	0.489	.	AAUGUAGGAUCACGUUAGAGUGUC	52	11	8	11	11	85	328	24	N
Fvb1:10144834-10144945	TE_homo_4204	Fvb1	10144834	10144945	112	48	36	0.521	.	GAGGAUCCGGCUCCUCUAAAGUGA	8	2	0	2	3	5	36	24	N
Fvb1:10155367-10155770	TE_homo_4209	Fvb1	10155367	10155770	404	548	204	0.505	.	GAUAAAUCACACUUACGAAUGCCU	31	10	14	17	18	79	410	24	N
Fvb1:10162354-10162469	TE_homo_4210	Fvb1	10162354	10162469	116	271	126	0.483	.	ACCGGUCCAAUAAUGCUGAUACU	12	14	10	19	11	45	172	24	N
Fvb1:10172657-10172807	TE_homo_4221	Fvb1	10172657	10172807	151	1186	340	0.599	.	AAUCAACAGUGGAGAUGACGGGUG	73	33	11	41	40	166	895	24	N
Fvb1:10189850-10190245	TE_homo_4247	Fvb1	10189850	10190245	396	84	42	0.679	.	CAGCUGGUUAUGACUGUGACAUGC	14	2	0	1	2	4	75	24	N
Fvb1:10200706-10200801	TE_homo_4254	Fvb1	10200706	10200801	96	13	12	0.769	.	GAGUUGAACACGAACGAUUCGAGC	2	1	0	1	0	0	11	24	N
Fvb1:10213661-10213890	TE_homo_4263	Fvb1	10213661	10213890	230	102	50	0.549	.	ACAUUUUUAUCUAGGAUUAGGCCC	15	8	0	8	3	6	77	24	N
Fvb1:10219953-10220160	TE_homo_4264	Fvb1	10219953	10220160	208	69	50	0.493	.	AACCGUUUUGUUUUUAGGAUAGAC	8	2	3	0	1	17	46	24	N
Fvb1:10226064-10226243	TE_homo_4268	Fvb1	10226064	10226243	180	137	60	0.752	.	AGUUUUUAGGUUUAUAUGAGUAGA	29	4	1	1	1	22	108	24	N
Fvb1:10232550-10232821	TE_homo_4273	Fvb1	10232550	10232821	272	177	64	0.401	.	AAUCAAUAGAUAAUCCAAGUCUGU	80	5	3	2	3	16	148	24	N
Fvb1:10277038-10277230	TE_homo_4303	Fvb1	10277038	10277230	193	7	5	0.571	.	AAAAUGUCAUUUUGGUUAGCCACU	3	0	0	0	0	2	5	24	N
Fvb1:10387485-10387664	TE_homo_4335	Fvb1	10387485	10387664	180	15	9	1	+	AAGGAAUGAGAGACGAAAUGGAAC	5	1	0	1	2	1	10	24	N
Fvb1:10388211-10388424	TE_homo_4336	Fvb1	10388211	10388424	214	267	113	0.206	.	AUUUCGGCAGAGGAGAAUUCAAGC	31	7	3	4	13	37	203	24	N
Fvb1:10396335-10396447	TE_homo_4339	Fvb1	10396335	10396447	113	60	33	0.617	.	AGAACUUAUUUCUUAGUCUGGACU	7	1	1	1	2	8	47	24	N
Fvb1:10420299-10420413	TE_homo_4347	Fvb1	10420299	10420413	115	11	8	0.545	.	AGUGACUAAAACUUUGUCUUUUCA	3	0	0	0	0	0	11	24	N
Fvb1:10432008-10432197	TE_homo_4351	Fvb1	10432008	10432197	190	47	34	0.66	.	AGAUAAAAAUUCGUACCGGACGAU	4	1	0	2	0	4	40	24	N
Fvb1:10549103-10549187	TE_homo_4391	Fvb1	10549103	10549187	85	71	27	0.69	.	UCACUCGUCGGCUAAAAUCUUAGC	16	0	2	0	1	8	60	24	N
Fvb1:10564311-10564454	TE_homo_4403	Fvb1	10564311	10564454	144	86	42	0.384	.	GUGAAUGUGUUACCUAAAAAAGGA	7	2	0	3	0	10	71	24	N
Fvb1:10698287-10698707	TE_homo_4458	Fvb1	10698287	10698707	421	63	31	0.159	-	AGGACUUGGUGAGGACUUUUCGGU	23	5	1	1	1	8	47	24	N
Fvb1:10706273-10707238	TE_homo_4465	Fvb1	10706273	10707238	966	100	47	0.18	-	AUACACAAUGACUAUUAAGGACAU	22	2	4	3	0	4	87	24	N
Fvb1:10711890-10712261	TE_homo_4468	Fvb1	10711890	10712261	372	76	45	0.553	.	AGGGAUAGAACAAUCGGUUAACGA	17	2	1	1	7	7	58	24	N
Fvb1:10735531-10736015	TE_struc_139	Fvb1	10735531	10736015	485	15	10	0.533	.	AAUGACUAACAUGAUGAUCGACCU	4	0	0	0	1	5	9	24	N
Fvb1:10742994-10743414	TE_homo_4488	Fvb1	10742994	10743414	421	68	35	0.221	.	GAGGACCCUUAAGUUGAAGACUUG	13	7	0	0	0	6	55	24	N
Fvb1:10812119-10812458	TE_homo_4530	Fvb1	10812119	10812458	340	32	17	0.406	.	AACAGAUCUAAUGGUGUGGACCU	5	2	0	0	1	5	24	24	N
Fvb1:10812399-10812479	TE_homo_4531	Fvb1	10812399	10812479	81	32	18	0.438	.	AACAGAUCUAAUGGUGUGGACCU	5	2	0	0	1	6	23	24	N
Fvb1:10814422-10814842	TE_homo_4534	Fvb1	10814422	10814842	421	1323	325	0.513	.	AGGACUUGGUGAGGACUUUUCGGU	248	61	19	37	28	199	979	24	N
Fvb1:10837410-10837803	TE_homo_4538	Fvb1	10837410	10837803	394	675	272	0.513	.	ACGGUCGAGAUGUAAAUAUGUGAU	44	27	10	22	15	129	472	24	N
Fvb1:10849093-10849258	TE_homo_4539	Fvb1	10849093	10849258	166	15	12	0.267	.	GUCGUGUAUACAAGAAUUUCCACU	3	1	0	0	0	3	11	24	N
Fvb1:10849411-10849622	TE_homo_4541	Fvb1	10849411	10849622	212	21	19	0.905	+	CCGUAUACUGAAAAUGCUCUCCAA	2	0	0	0	0	6	15	24	N
Fvb1:10862941-10863877	TE_homo_4551	Fvb1	10862941	10863877	937	317	124	0.688	.	GAGAGAAUGAGUAGUAUACUGAGC	91	18	5	9	4	44	237	24	N
Fvb1:10882592-10882715	TE_homo_4572	Fvb1	10882592	10882715	124	525	143	0.377	.	GUGUCGUGAGGUUUGAACCUAUGA	51	19	2	11	10	71	412	24	N
Fvb1:10951656-10951817	TE_homo_4603	Fvb1	10951656	10951817	162	6	5	0	-	AGGGACGGAGCAUAAUGGAAUGGU	2	1	0	0	0	0	5	24	N
Fvb1:10964581-10964709	TE_homo_4617	Fvb1	10964581	10964709	129	110	46	0.218	.	GGUGUUAACUAGCAACUUUGAGGU	21	4	7	3	2	8	86	24	N
Fvb1:10986426-10986844	TE_homo_4623	Fvb1	10986426	10986844	419	680	241	0.543	.	GUGAGGACCCUUAAGUUGAGGACU	84	20	4	16	10	91	539	24	N
Fvb1:10990255-10990469	TE_homo_4625	Fvb1	10990255	10990469	215	208	66	0.13	-	AGGGAAUGAUUUCGACUGAAGAGA	85	8	2	3	2	14	179	24	N
Fvb1:11020910-11021260	TE_homo_4637	Fvb1	11020910	11021260	351	80	59	0.588	.	AUUUCUCAUGUCGAUUUUGUAUA	5	3	4	1	2	20	50	24	N
Fvb1:11022368-11022534	TE_homo_4639	Fvb1	11022368	11022534	167	41	19	0.732	.	AACACCUAAUAGAUCAUCGUCAUU	14	0	0	1	1	1	38	24	N
Fvb1:11024619-11024980	TE_homo_4641	Fvb1	11024619	11024980	362	582	242	0.515	.	AGUAUGUACGUAUGCGUCUGGACU	48	15	20	24	11	79	433	24	N
Fvb1:11040845-11040947	TE_homo_4646	Fvb1	11040845	11040947	103	3	3	0	-	GCCGGAAUCGACUGGAGAAGAAGG	1	0	0	0	0	0	3	24	N
Fvb1:11090666-11091470	TE_struc_142	Fvb1	11090666	11091470	805	70	40	0.3	.	AUACCGGUAAAUGAAUGUCUAUGC	22	0	0	3	3	7	57	24	N
Fvb1:11116093-11116208	TE_homo_4699	Fvb1	11116093	11116208	116	318	108	0.748	.	AAUCCUGCUGGUUUAAAGUCGACA	35	2	3	3	6	37	267	24	N
Fvb1:11130506-11130881	TE_homo_4702	Fvb1	11130506	11130881	376	1365	355	0.716	.	AGGACUUGGUGAGGACUUUUCGGC	144	84	18	45	36	220	962	24	N
Fvb1:11190346-11190489	TE_homo_4737	Fvb1	11190346	11190489	144	5	5	0.6	.	AUUGUAGUAGAGAUAUGGGGUCU	1	0	0	0	0	1	4	24	N
Fvb1:11204646-11205104	TE_struc_143	Fvb1	11204646	11205104	459	401	124	0.576	.	AUUUAGACAUGUAGAUUUUCUUCA	44	16	7	2	12	53	311	24	N
Fvb1:11217989-11218073	TE_homo_4744	Fvb1	11217989	11218073	85	918	209	0.281	.	CUACUCGGUACAAAAUCAAAAGCU	181	31	16	35	31	123	682	24	N
Fvb1:11229320-11229412	TE_homo_4750	Fvb1	11229320	11229412	93	411	126	0.832	+	AAACUGGAAUUCGGCGAACUCGCC	125	17	4	55	36	37	262	24	N
Fvb1:11232191-11232693	TE_homo_4754	Fvb1	11232191	11232693	503	618	253	0.583	.	AUCAGUCGGGUCCAAUUUUUGAAU	81	21	10	26	10	79	472	24	N
Fvb1:11232579-11232714	TE_homo_4755	Fvb1	11232579	11232714	136	190	67	0.437	.	AUCAGUCGGGUCCAAUUUUUGAAU	81	3	2	6	5	19	155	24	N
Fvb1:11242732-11242828	TE_homo_4758	Fvb1	11242732	11242828	97	274	115	0.686	.	UGGACGGUGGAUACACCCGGGUGC	27	14	1	12	8	35	204	24	N
Fvb1:11253225-11253574	TE_homo_4759	Fvb1	11253225	11253574	350	1403	391	0.352	.	AAACAGAUCUAAUGGUGUGGACCU	144	60	22	40	25	210	1046	24	N
Fvb1:11253751-11254189	TE_homo_4760	Fvb1	11253751	11254189	439	174	60	0.678	.	AAAUGGCUUAAAAUAGGGAUCCCU	49	2	4	7	3	12	146	24	N
Fvb1:11274031-11274462	TE_homo_4765	Fvb1	11274031	11274462	432	31	15	0.742	.	AUAUAGACCUAAGAUAUGAACGGU	12	0	1	3	2	2	23	24	N
Fvb1:11274552-11274971	TE_homo_4768	Fvb1	11274552	11274971	420	856	120	0.883	+	GAUAAAUCACACUUAUGAAUGCCU	575	6	12	8	4	43	783	24	N
Fvb1:11293484-11294045	TE_homo_4770	Fvb1	11293484	11294045	562	17	13	0.353	.	AGAGGAUGUAGACAAAUUCUGGGU	3	1	0	0	1	2	13	24	N
Fvb1:11297148-11297835	TE_homo_4773	Fvb1	11297148	11297835	688	72	54	0.431	.	AUCAACGAGUGUAGGAGGCCGGCC	5	9	1	4	3	5	50	24	N
Fvb1:11322140-11322796	TE_struc_145	Fvb1	11322140	11322796	657	109	42	0.587	.	AUGGGGAUCCUUAGUAUUCGGAUU	29	3	0	6	0	7	93	24	N
Fvb1:11346611-11346947	TE_homo_4807	Fvb1	11346611	11346947	337	657	223	0.795	.	AAGGACCAUUCAGAUUAAAAUAAA	87	23	3	18	12	82	519	24	N
Fvb1:11346952-11347876	TE_struc_146	Fvb1	11346952	11347876	925	410	162	0.359	.	GUGGAGGUACACUGAGCAAAUCUG	91	8	5	17	9	69	302	24	N
Fvb1:11349543-11349709	TE_homo_4809	Fvb1	11349543	11349709	167	586	200	0.539	.	ACCUUAAAGAUGGUUAAGUUGGGA	90	20	7	15	14	86	444	24	N
Fvb1:11421590-11421952	TE_homo_4852	Fvb1	11421590	11421952	363	256	99	0.695	.	AAUAUGUAUGUGUGCGUCUGGACU	38	9	3	4	4	34	202	24	N
Fvb1:11430630-11430833	TE_homo_4862	Fvb1	11430630	11430833	204	70	43	0.757	.	UUUGGUCACCUCACACGUUGUUGA	9	1	5	0	2	17	45	24	N
Fvb1:11430830-11431332	TE_homo_4863	Fvb1	11430830	11431332	503	264	137	0.375	.	GAAUAAGGGGUUUCGUCAGGAAUU	24	8	3	2	3	45	203	24	N
Fvb1:11431338-11431878	TE_homo_4864	Fvb1	11431338	11431878	541	202	117	0.713	.	AGAGAAUGCGAGGUGAGUAAAAUG	14	7	2	4	4	25	160	24	N
Fvb1:11445228-11445571	TE_homo_4878	Fvb1	11445228	11445571	344	76	59	0.447	.	AUAGCCCAACGAACUGAACGAUGG	4	4	3	2	2	25	40	24	N
Fvb1:11502715-11503663	TE_homo_4953	Fvb1	11502715	11503663	949	390	110	0.485	.	AUUAUGAGUGCGGCUAUUGGGACC	64	8	0	10	1	40	331	24	N
Fvb1:11506272-11506397	TE_homo_4957	Fvb1	11506272	11506397	126	70	31	0.943	+	ACUUCGAGGACUCAUUUUACAACU	20	0	3	2	1	12	52	24	N
Fvb1:11506277-11506434	TE_homo_4958	Fvb1	11506277	11506434	158	102	46	0.961	+	ACUUCGAGGACUCAUUUUACAACU	20	2	6	3	2	16	73	24	N
Fvb1:11537642-11538120	TE_homo_4968	Fvb1	11537642	11538120	479	588	206	0.291	.	AAUGACUAAAUUGAAAUUGAGCCU	76	26	11	22	10	44	475	24	N
Fvb1:11553529-11553835	TE_homo_4978	Fvb1	11553529	11553835	307	86	49	0.826	+	CUAACCCUAGAACUAAUAGCCCAU	24	9	0	6	4	8	59	24	N
Fvb1:11570427-11570842	TE_homo_4988	Fvb1	11570427	11570842	416	21	17	0.571	.	AAUGUUGGCAGGGGUCUGGACCCC	4	1	0	0	1	1	18	24	N
Fvb1:11584386-11584614	TE_homo_4992	Fvb1	11584386	11584614	229	46	26	0.63	.	GAAAUAUAGUAUGUUUCGUCGGCU	12	2	1	1	2	3	37	24	N
Fvb1:11584615-11584730	TE_homo_4993	Fvb1	11584615	11584730	116	1	1	1	+	AAAAAAUUGCAGAAACUUUCGGCC	1	0	0	0	0	0	1	24	N
Fvb1:11597756-11598061	TE_homo_5008	Fvb1	11597756	11598061	306	95	54	0.526	.	ACCUUGAGGACUCAUUUUACAACU	14	1	6	7	2	8	71	24	N
Fvb1:11606530-11606636	TE_homo_5013	Fvb1	11606530	11606636	107	66	41	0.636	.	AAUUUUCUGGGAGAUUUCGAAACU	11	2	0	2	5	12	45	24	N
Fvb1:11607608-11608094	TE_homo_5017	Fvb1	11607608	11608094	487	181	105	0.199	-	UUGAGAUUGAUGUCAUUUUGA	18	6	1	31	2	24	117	24	N
Fvb1:11607991-11608120	TE_homo_5018	Fvb1	11607991	11608120	130	16	16	0.312	.	UCGCCGCCGCGCCUCCACCUC	1	1	1	2	0	0	12	24	N
Fvb1:11616830-11616969	TE_homo_5025	Fvb1	11616830	11616969	140	10	6	1	+	AGGUAUCAGACUGAUUUUAGACCU	5	0	0	0	0	1	9	24	N
Fvb1:11621255-11621389	TE_homo_5037	Fvb1	11621255	11621389	135	2	2	0.5	.	GAAGGGAUUUGUUUAAGAAUAUUU	1	0	0	0	0	0	2	24	N
Fvb1:11631840-11631982	TE_homo_5045	Fvb1	11631840	11631982	143	19	9	0.789	.	UUGAACCGGACCCCUAAUCAUCAG	6	0	0	0	0	2	17	24	N
Fvb1:11633876-11634095	TE_homo_5049	Fvb1	11633876	11634095	220	60	19	0.767	.	GGGGUCAAAAGUGAUUCUGGGCCU	33	2	0	2	0	2	54	24	N
Fvb1:11638346-11638439	TE_homo_5052	Fvb1	11638346	11638439	94	6	5	0.333	.	AGUUGUAAGUAAAAACUGCUUUGG	2	0	0	0	0	0	6	24	N
Fvb1:11638422-11638561	TE_homo_5053	Fvb1	11638422	11638561	140	54	33	0.148	-	UUCUGAUGUUGCUGUGAGUAGAAU	5	3	0	0	0	4	47	24	N
Fvb1:11642262-11642364	TE_homo_5062	Fvb1	11642262	11642364	103	2	2	0	-	AAACUGCAUAAACUUUUGGCCACC	1	0	0	0	0	0	2	24	N
Fvb1:11665696-11665823	TE_homo_5082	Fvb1	11665696	11665823	128	19	14	0.579	.	UAGGGAUAGAGUAUUUGACGAACU	4	2	0	0	1	4	12	24	N
Fvb1:11669421-11669511	TE_homo_5090	Fvb1	11669421	11669511	91	19	14	0.737	.	AAAUACCCUUAGUGAGUCAACUGA	3	0	1	0	1	0	17	24	N
Fvb1:11672853-11673147	TE_struc_150	Fvb1	11672853	11673147	295	308	42	0.136	-	AGGGAAUCUGUUGGAGCAAAACAC	190	0	6	0	1	20	281	24	N
Fvb1:11689559-11689811	TE_homo_5115	Fvb1	11689559	11689811	253	31	22	0.355	.	GCCGGAAAACUGGAAUUCAGCUGU	3	3	0	1	2	2	23	24	N
Fvb1:11692601-11692775	TE_struc_151	Fvb1	11692601	11692775	175	44	26	0.75	.	AUGUAUGAAAUCAAUGAACAGACU	6	2	0	0	0	3	39	24	N
Fvb1:11693850-11694023	TE_homo_5123	Fvb1	11693850	11694023	174	19	18	0.474	.	UACAUGAUGUAGAUGUUUUAGCU	2	1	0	2	2	4	10	24	N
Fvb1:11704258-11704422	TE_struc_152	Fvb1	11704258	11704422	165	13	12	0.538	.	AAUCAAUUGAGGUGAUCGUUAAGA	2	1	0	0	0	2	10	24	N
Fvb1:11716531-11716793	TE_homo_5141	Fvb1	11716531	11716793	263	1	1	0	-	AUAUUUGUAUGGGUUUAAUUAGGA	1	0	0	0	0	0	1	24	N
Fvb1:11722290-11722465	TE_homo_5154	Fvb1	11722290	11722465	176	24	20	0.542	.	AAUUUUGUAGAACGGCGUCGGUAG	4	3	0	0	0	2	19	24	N
Fvb1:11743389-11743743	TE_homo_5166	Fvb1	11743389	11743743	355	73	42	0.219	.	CUAUUGGCUCUAGGGUUAGAAC	12	1	0	2	15	6	49	24	N
Fvb1:11743464-11743975	TE_homo_5167	Fvb1	11743464	11743975	512	41	31	0.341	.	GAGAAAGAAUUGUUUUUAGGGAUU	5	1	0	5	3	3	29	24	N
Fvb1:11745602-11745762	TE_homo_5171	Fvb1	11745602	11745762	161	9	9	0.444	.	GCUUAAACGAAGUUGACUGUCUU	1	1	0	0	0	2	6	24	N
Fvb1:11753568-11753743	TE_homo_5182	Fvb1	11753568	11753743	176	268	134	0.463	.	AAUUAUGGUCAAUCAUCAUUGGAU	23	7	9	7	10	33	202	24	N
Fvb1:11802586-11803004	TE_struc_154	Fvb1	11802586	11803004	419	1025	176	0.679	.	ACGUAAGACCACGUCAGACUGCCA	223	8	11	17	9	109	871	24	N
Fvb1:11802587-11803003	TE_struc_155	Fvb1	11802587	11803003	417	1025	176	0.679	.	ACGUAAGACCACGUCAGACUGCCA	223	8	11	17	9	109	871	24	N
Fvb1:11809284-11809445	TE_homo_5207	Fvb1	11809284	11809445	162	56	42	0.714	.	UCGAAAGGUAUGUCUUGAAACCCU	8	3	0	0	2	8	43	24	N
Fvb1:11809303-11809657	TE_homo_5208	Fvb1	11809303	11809657	355	149	98	0.725	.	AUAUUCUCCGGAUUGUGUUUGAUC	9	6	2	6	6	22	107	24	N
Fvb1:11811290-11811461	TE_homo_5211	Fvb1	11811290	11811461	172	22	22	0.591	.	GUCCAAAAUGGACAGAUUGCUGAU	1	2	0	1	2	4	13	24	N
Fvb1:11826883-11826994	TE_homo_5218	Fvb1	11826883	11826994	112	14	10	0.714	.	AAAAGAGGAUUGGAACUACCUACC	3	2	0	0	0	0	12	24	N
Fvb1:11830431-11830763	TE_homo_5220	Fvb1	11830431	11830763	333	703	223	0.432	.	UUACCGAUUAUAAACUUGAACAGU	84	17	7	22	21	148	488	24	N
Fvb1:11841297-11841474	TE_homo_5223	Fvb1	11841297	11841474	178	1024	291	0.345	.	AAUACUGUCUCAACUUAACCACCU	124	49	11	24	27	111	802	24	N
Fvb1:11891516-11891862	TE_homo_5242	Fvb1	11891516	11891862	347	77	42	0.506	.	CGGAAAACUGGAAUUCGGCGGACU	9	10	2	20	2	11	32	24	N
Fvb1:11908546-11908671	TE_homo_5244	Fvb1	11908546	11908671	126	16	9	0.062	-	AUGAGAUUGUUAUUUGUAGGAGUA	7	0	0	0	1	1	14	24	N
Fvb1:11914982-11915083	TE_homo_5246	Fvb1	11914982	11915083	102	255	86	0.898	+	AAUGGACAUUGAGUCGUCUCUGGA	51	10	4	10	8	23	200	24	N
Fvb1:11962000-11962301	TE_homo_5271	Fvb1	11962000	11962301	302	124	63	0.29	.	AAGACUUGGGAUGACACUUGGGGC	25	4	2	2	3	9	104	24	N
Fvb1:12010631-12011028	TE_homo_5300	Fvb1	12010631	12011028	398	48	38	0.458	.	AUGACUGAUGCUUGCAACGUGAAA	4	0	0	1	0	5	42	24	N
Fvb1:12020849-12021031	TE_homo_5305	Fvb1	12020849	12021031	183	977	169	0.88	+	AUCACUGUUGGAUGUAAGUCUAAG	161	23	28	16	10	206	694	24	N
Fvb1:12022381-12022679	TE_homo_5306	Fvb1	12022381	12022679	299	28	25	0.429	.	AACCCGUAGGGCUUGGGUAGGGCC	2	2	0	2	0	3	21	24	N
Fvb1:12022728-12022985	TE_homo_5307	Fvb1	12022728	12022985	258	14	12	0.357	.	AUACGGGUAUAAACGGGUAACGGG	2	1	0	0	0	2	11	24	N
Fvb1:12022986-12023374	TE_homo_5308	Fvb1	12022986	12023374	389	25	20	0.76	.	AUCCCUAGCCGGGCCGGACCGGGC	4	0	0	0	1	5	19	24	N
Fvb1:12023375-12023483	TE_homo_5309	Fvb1	12023375	12023483	109	75	47	0.76	.	ACCGGGCGGACUUUGAUGGGCAUG	5	4	1	7	5	15	43	24	N
Fvb1:12065991-12066402	TE_homo_5323	Fvb1	12065991	12066402	412	160	53	0.362	.	GUGGAGGUACACUGAGCAAAUCUG	48	8	1	1	3	16	131	24	N
Fvb1:12066386-12066948	TE_homo_5324	Fvb1	12066386	12066948	563	50	35	0.54	.	CAGGGAGGUACAAUGAGCAAAUCU	9	2	0	0	1	7	40	24	N
Fvb1:12068768-12068962	TE_homo_5329	Fvb1	12068768	12068962	195	13	12	0.154	-	CGCCCUAGCCCAGCCUUAUACC	2	1	1	0	2	0	9	24	N
Fvb1:12069689-12070514	TE_struc_156	Fvb1	12069689	12070514	826	49	30	0.327	.	CGGGACGGGAUGGGACGGGAUUGC	5	0	1	0	0	4	44	24	N
Fvb1:12071675-12072017	TE_homo_5332	Fvb1	12071675	12072017	343	25	11	0.52	.	AAAAAACAGAUCUAAUGGUGUGGA	6	0	0	0	1	4	20	24	N
Fvb1:12094839-12095015	TE_homo_5343	Fvb1	12094839	12095015	177	1767	351	0.542	.	AUAAUGAGGACCAAGUGAGGACUU	104	121	16	84	49	293	1204	24	N
Fvb1:12098687-12098989	TE_homo_5344	Fvb1	12098687	12098989	303	207	123	0.304	.	AGUGGUUUGUGGGAUGACAAUAGA	14	9	4	5	4	31	154	24	N
Fvb1:12099370-12099463	TE_homo_5346	Fvb1	12099370	12099463	94	5	4	1	+	AAUGUAGAAAGCAAAUAUGAAAUU	2	0	0	0	1	0	4	24	N
Fvb1:12144397-12144537	TE_homo_5373	Fvb1	12144397	12144537	141	20	13	0	-	AUAAGAGUGCGGCUGUUAGGGCCU	5	0	0	0	0	2	18	24	N
Fvb1:12150158-12150544	TE_struc_157	Fvb1	12150158	12150544	387	64	42	0.469	.	UGAUGAAAAUAAAAGUGUAGGGAC	6	5	1	3	5	3	47	24	N
Fvb1:12161556-12161664	TE_homo_5394	Fvb1	12161556	12161664	109	38	11	0.789	.	ACGAAAAAUUGAUUCGUCGGCCU	10	0	0	0	4	11	23	24	N
Fvb1:12186399-12186500	TE_homo_5405	Fvb1	12186399	12186500	102	154	75	0.857	+	GGAUAUCUUGUGUGGACUUGACUC	15	15	6	14	3	19	97	24	N
Fvb1:12186717-12186872	TE_homo_5406	Fvb1	12186717	12186872	156	2	2	1	+	AAAAAAACUGUCUAGGCUGGAGCC	1	0	0	0	0	0	2	24	N
Fvb1:12196485-12196870	TE_homo_5421	Fvb1	12196485	12196870	386	47	23	0.255	.	AAACGGAAUAUGAGAAUUUAGACA	10	1	1	0	1	3	41	24	N
Fvb1:12218715-12219019	TE_homo_5450	Fvb1	12218715	12219019	305	40	24	0.35	.	ACGAGGACUUAAGGUAAUAAUAUU	7	0	1	3	4	6	26	24	N
Fvb1:12219150-12219577	TE_homo_5452	Fvb1	12219150	12219577	428	567	90	0.148	-	ACUAAAUUGAACUUUUGAAAGCCU	386	8	5	14	8	30	502	24	N
Fvb1:12230252-12230665	TE_homo_5457	Fvb1	12230252	12230665	414	731	166	0.721	.	AGAAUGUAGGACCACAUUAUACUG	156	25	6	37	12	91	560	24	N
Fvb1:12291235-12291617	TE_homo_5503	Fvb1	12291235	12291617	383	235	103	0.54	.	AAAAUAGAGUCCGAACGCACACGU	47	3	2	7	8	22	193	24	N
Fvb1:12297270-12297711	TE_homo_5511	Fvb1	12297270	12297711	442	205	75	0.854	+	UAUGAUUUGGUGAUCGUUAAGGCU	44	7	1	12	6	23	156	24	N
Fvb1:12307334-12307834	TE_homo_5518	Fvb1	12307334	12307834	501	22	20	0.727	.	ACUGAAUUCUAACAUGAGCAAUGG	2	0	0	1	1	3	17	24	N
Fvb1:12312909-12313030	TE_homo_5520	Fvb1	12312909	12313030	122	170	93	0.335	.	AUGUGAACACCACUGAGACCGAAA	15	6	11	15	2	29	107	24	N
Fvb1:12314494-12314798	TE_homo_5522	Fvb1	12314494	12314798	305	21	17	0.619	.	AUUCAUCGGCUAAAGUUUGGAAGA	4	2	0	2	1	3	13	24	N
Fvb1:12323321-12323595	TE_homo_5531	Fvb1	12323321	12323595	275	33	22	0.333	.	AGAGAAUGAUAGGUAUACUGAGCA	7	1	1	0	0	4	27	24	N
Fvb1:12371499-12371895	TE_homo_5547	Fvb1	12371499	12371895	397	95	36	0.8	+	AUUUGUUGCUGUAGCCUUGGUGAC	38	3	0	1	2	6	83	24	N
Fvb1:12446393-12446899	TE_homo_5584	Fvb1	12446393	12446899	507	398	171	0.671	.	AACACCCAGAGGAUUAAUCGGACA	33	12	8	24	12	49	293	24	N
Fvb1:12448093-12448191	TE_homo_5587	Fvb1	12448093	12448191	99	17	13	0.765	.	AUUGACUGACUUAGGCAUCGUAGU	3	1	1	0	0	3	12	24	N
Fvb1:12453325-12453685	TE_homo_5589	Fvb1	12453325	12453685	361	20	15	0.35	.	CCGGUAUUGUUCUGUUUUAACCAA	4	0	1	0	0	5	14	24	N
Fvb1:12453686-12453957	TE_homo_5590	Fvb1	12453686	12453957	272	410	154	0.507	.	AUGAGGAUUCUCAGUAUUCGGAUU	68	11	10	21	6	51	311	24	N
Fvb1:12455648-12455754	TE_homo_5591	Fvb1	12455648	12455754	107	648	203	0.338	.	CGGAGAUGGACGGGUGCGCUGAAU	71	19	1	14	23	123	468	24	N
Fvb1:12463185-12463345	TE_homo_5593	Fvb1	12463185	12463345	161	742	149	0.175	-	AUUGUACCGAGGUCUGUUGUGAUU	139	19	9	21	15	185	493	24	N
Fvb1:12494031-12494171	TE_homo_5602	Fvb1	12494031	12494171	141	414	102	0.512	.	AGGCCCGGACCUGUGAUUUUUAGA	79	10	4	26	2	80	292	24	N
Fvb1:12499701-12499874	TE_homo_5609	Fvb1	12499701	12499874	174	73	47	0.534	.	AGGACUCAUAUUACAACUUCGAUA	5	1	4	0	3	8	57	24	N
Fvb1:12500816-12501232	TE_homo_5611	Fvb1	12500816	12501232	417	249	101	0.277	.	AAACUAUUGGAGAUGCUCUGACCU	71	8	3	2	4	23	209	24	N
Fvb1:12516029-12516188	TE_homo_5612	Fvb1	12516029	12516188	160	450	126	0.753	.	AUUGUACUGAGACUUGUUAGGAUU	54	5	8	8	17	72	340	24	N
Fvb1:12516989-12517401	TE_homo_5613	Fvb1	12516989	12517401	413	805	213	0.188	-	ACGAGAACUUUAAAUUGAGAAUUU	163	12	21	8	12	76	676	24	N
Fvb1:12537527-12537909	TE_homo_5618	Fvb1	12537527	12537909	383	105	21	0.076	-	AUGGACUGAAAUAAAGUUAACCCU	38	2	0	1	0	12	90	24	N
Fvb1:12537810-12537946	TE_homo_5619	Fvb1	12537810	12537946	137	1	1	1	+	UUAAAUAAGAUCAACUCAAAACCU	1	0	0	0	0	0	1	24	N
Fvb1:12547654-12547869	TE_homo_5623	Fvb1	12547654	12547869	216	109	65	0.413	.	AUUAUUCCUUGUACCCAGAACACC	8	3	0	3	1	17	85	24	N
Fvb1:12548053-12548349	TE_homo_5624	Fvb1	12548053	12548349	297	179	80	0.654	.	ACUUGAGGACAAAAUUGCGUGAAU	20	5	6	9	0	35	124	24	N
Fvb1:12549571-12549855	TE_homo_5628	Fvb1	12549571	12549855	285	45	33	0.289	.	ACAAAUGAUGACUAAUGUAGUAAU	4	1	2	1	4	6	31	24	N
Fvb1:12549924-12550006	TE_homo_5629	Fvb1	12549924	12550006	83	6	6	0.667	.	ACUUUAUGGUAAUUCCUUUCCUUC	1	0	0	0	0	1	5	24	N
Fvb1:12566471-12566880	TE_homo_5648	Fvb1	12566471	12566880	410	150	70	0.673	.	ACUGAACAGAUGAGAUGACAAAAU	11	4	1	1	6	33	105	24	N
Fvb1:12567257-12567506	TE_homo_5651	Fvb1	12567257	12567506	250	228	114	0.329	.	AUGAGGACCUUUAAGUUGAAUACU	28	8	9	13	8	28	162	24	N
Fvb1:12567262-12567556	TE_homo_5652	Fvb1	12567262	12567556	295	229	115	0.328	.	AUGAGGACCUUUAAGUUGAAUACU	28	8	9	12	8	27	165	24	N
Fvb1:12587792-12587963	TE_homo_5663	Fvb1	12587792	12587963	172	38	34	0.763	.	AUGGUUGGUCAGUACAUAUAUGCU	3	3	0	3	0	5	27	24	N
Fvb1:12592826-12593041	TE_homo_5665	Fvb1	12592826	12593041	216	1	1	1	+	AAAACUGCCAUAACUCUCUCCAGG	1	0	0	0	0	0	1	24	N
Fvb1:12599698-12600025	TE_homo_5671	Fvb1	12599698	12600025	328	8	7	0.375	.	AUAAACAAAGAAGAUCUAUGGCCU	2	0	1	0	0	1	6	24	N
Fvb1:12601768-12601880	TE_homo_5676	Fvb1	12601768	12601880	113	10	8	0.5	.	CUUAACCAAAUUUAGCCUAUAAGA	3	1	0	1	1	0	7	24	N
Fvb1:12603047-12603456	TE_struc_162	Fvb1	12603047	12603456	410	848	296	0.578	.	ACUGAACGGAUGAGAUGACAAGAU	104	18	7	20	16	109	678	24	N
Fvb1:12603457-12603547	TE_homo_5681	Fvb1	12603457	12603547	91	5	5	0.2	.	AAGGGGAGCCUUUUUAGUGAGGAU	1	0	0	0	0	2	3	24	N
Fvb1:12612356-12612663	TE_homo_5691	Fvb1	12612356	12612663	308	82	45	0.756	.	UGCUGGAGUCUUCUGGGGUGGAGG	11	5	0	8	3	6	60	24	N
Fvb1:12612586-12612719	TE_homo_5692	Fvb1	12612586	12612719	134	9	8	0.333	.	GUGCCCUUUAUAUCAUUUUCGUGU	2	0	0	0	0	2	7	24	N
Fvb1:12627789-12628565	TE_homo_5709	Fvb1	12627789	12628565	777	217	126	0.512	.	AAGGCUCAGCCUGACCCACGGCCC	15	12	3	13	8	19	162	24	N
Fvb1:12628693-12629101	TE_homo_5710	Fvb1	12628693	12629101	409	126	60	0.73	.	GAUAAAUCACACUUAUGAAUGCCU	22	2	4	3	0	12	105	24	N
Fvb1:12629198-12629488	TE_homo_5711	Fvb1	12629198	12629488	291	67	52	0.478	.	AAACUCUCAAAUUUUAGGAAAUGA	5	1	1	6	1	5	53	24	N
Fvb1:12630840-12631171	TE_homo_5712	Fvb1	12630840	12631171	332	1237	370	0.301	.	GACGGAAGAACUAUUUGAAAGAAA	178	42	21	28	21	226	899	24	N
Fvb1:12634734-12635109	TE_struc_164	Fvb1	12634734	12635109	376	153	75	0.425	.	UGGCAGUCUGACGUGGUUCUCCA	13	3	1	4	0	35	110	24	N
Fvb1:12668960-12669087	TE_homo_5731	Fvb1	12668960	12669087	128	11	11	0.364	.	AUAUAGUGAUUUGUAACACCUCUA	1	1	0	0	0	1	9	24	N
Fvb1:12713063-12713327	TE_homo_5754	Fvb1	12713063	12713327	265	6	5	0	-	GAUGAAUUGCAUGUUUACUGACA	2	0	0	0	0	2	4	24	N
Fvb1:12730863-12731315	TE_homo_5776	Fvb1	12730863	12731315	453	18	16	0.222	.	CUUCCGUGUGUCGGUCGUGCC	2	0	1	2	1	2	12	24	N
Fvb1:12742720-12743027	TE_homo_5788	Fvb1	12742720	12743027	308	52	31	0.481	.	AGGGUUAGAACAAAGUGCAUGAUA	11	1	2	3	2	11	33	24	N
Fvb1:12744848-12745009	TE_homo_5793	Fvb1	12744848	12745009	162	3	3	0.333	.	ACGAAGUUGACUGUCUAGAAAGGA	1	0	0	0	0	0	3	24	N
Fvb1:12754358-12755105	TE_homo_5804	Fvb1	12754358	12755105	748	176	115	0.443	.	AUGGGCUCGGCUCAAGCAUGGCAC	12	11	2	6	1	21	135	24	N
Fvb1:12758475-12758746	TE_homo_5810	Fvb1	12758475	12758746	272	88	60	0.511	.	AGGGGUUCUGACCCAGUCGUGCCU	7	4	0	8	2	3	71	24	N
Fvb1:12768081-12768519	TE_homo_5828	Fvb1	12768081	12768519	439	1120	397	0.379	.	UUAUAAUGAGAACUAGUUGAUGAC	72	47	24	29	34	162	824	24	N
Fvb1:12779511-12779682	TE_struc_167	Fvb1	12779511	12779682	172	15	12	0.333	.	CCAACACAUCUGUUAGUCAGCUGU	3	1	0	1	0	3	10	24	N
Fvb1:12800281-12800603	TE_homo_5843	Fvb1	12800281	12800603	323	52	34	0.212	.	CUCUAGGGUUAGAACAAAGUGCAU	6	0	0	1	1	7	43	24	N
Fvb1:12807526-12807689	TE_homo_5854	Fvb1	12807526	12807689	164	17	10	0.176	-	AGGUAUGAGUCGACUAUUAAAAGU	7	0	0	0	0	1	16	24	N
Fvb1:12808697-12808814	TE_homo_5856	Fvb1	12808697	12808814	118	10	6	0	-	AGAUGACCCUCCUAAUUUAGUUCU	3	0	0	0	0	4	6	24	N
Fvb1:12811861-12812281	TE_homo_5859	Fvb1	12811861	12812281	421	576	239	0.42	.	AAUCAAUGGACGAUCCAAAUCUGU	31	12	10	16	12	90	436	24	N
Fvb1:12894993-12895191	TE_homo_5882	Fvb1	12894993	12895191	199	28	23	0.464	.	UUCAGGUUGACUGCUAGCGUCUUC	3	1	0	2	1	4	20	24	N
Fvb1:12914499-12914859	TE_homo_5887	Fvb1	12914499	12914859	361	219	117	0.42	.	AAGAGAAGGGCCGUCGCCGGC	20	7	4	66	9	22	111	24	N
Fvb1:12918303-12918796	TE_struc_170	Fvb1	12918303	12918796	494	685	176	0.345	.	AAGACUGAACUGAUUUUGGCACCA	129	10	12	7	13	288	355	24	N
Fvb1:12919350-12919506	TE_homo_5896	Fvb1	12919350	12919506	157	17	14	0.824	+	GAAAUACUAAACCGUCGUAUAAGU	2	0	0	1	0	1	15	24	N
Fvb1:12925687-12926262	TE_homo_5901	Fvb1	12925687	12926262	576	156	78	0.269	.	AGGCCCGGACCUGAGAUUUUGAGA	34	7	2	6	2	16	123	24	N
Fvb1:12947130-12947311	TE_homo_5924	Fvb1	12947130	12947311	182	7	6	0.714	.	AAAUAGAUAUGGACGGACCGCGAA	2	0	0	0	0	0	7	24	N
Fvb1:12948832-12948946	TE_homo_5928	Fvb1	12948832	12948946	115	17	12	0.294	.	GAUCAAUUCGCGGCUUUUUCGGAU	4	0	0	0	0	2	15	24	N
Fvb1:12956115-12956462	TE_homo_5937	Fvb1	12956115	12956462	348	5	5	0.4	.	AGGGACAAAUGAGAAGAGAAGAAC	1	1	0	0	0	0	4	24	N
Fvb1:12956500-12956881	TE_homo_5938	Fvb1	12956500	12956881	382	43	36	0.186	-	AAACGGGUAUGGUAUUUUGAUUCC	3	3	2	3	3	5	27	24	N
Fvb1:12965416-12965783	TE_homo_5954	Fvb1	12965416	12965783	368	45	17	0.422	.	AGUUUCGGAUUUUCUUCUCGGCCU	15	1	0	1	0	1	42	24	N
Fvb1:12982267-12982652	TE_homo_5964	Fvb1	12982267	12982652	386	195	91	0.487	.	AGGACAUUUGGUCACGCUUGAGGA	17	2	2	20	5	16	150	24	N
Fvb1:12988479-12988915	TE_struc_172	Fvb1	12988479	12988915	437	100	68	0.71	.	CGGGCUUUCGGUUCAGGACCGAGC	18	7	0	5	5	15	68	24	N
Fvb1:12989523-12989798	TE_homo_5969	Fvb1	12989523	12989798	276	75	59	0.507	.	AGUAGUUUGUGGAAUGACAAUAGA	8	2	2	1	1	14	55	24	N
Fvb1:12992897-12992989	TE_homo_5975	Fvb1	12992897	12992989	93	11	8	0.727	.	CAUGCAGUGGCGUAGCCAGAAACU	4	0	1	0	0	1	9	24	N
Fvb1:12993462-12993901	TE_struc_174	Fvb1	12993462	12993901	440	58	39	0.448	.	AUUAGAGGUCCGUCGCGCAGUUGC	7	1	0	0	2	4	51	24	N
Fvb1:13011223-13011400	TE_homo_5982	Fvb1	13011223	13011400	178	184	65	0.462	.	AGAUUAAUUCAACUUUUGAACAGU	36	1	0	1	2	15	165	24	N
Fvb1:13022868-13023191	TE_homo_5988	Fvb1	13022868	13023191	324	2	2	0.5	.	GGAGGUUAAAUGUUAGCAUGAAAU	1	0	0	0	0	0	2	24	N
Fvb1:13037244-13037706	TE_struc_175	Fvb1	13037244	13037706	463	23	22	0.348	.	CUUGAACCAAAUGGUAGACUCAUU	2	1	1	1	2	5	13	24	N
Fvb1:13048598-13049246	TE_struc_176	Fvb1	13048598	13049246	649	417	65	0.144	-	AAGAAUCUGAAUACUGGGAAUCCC	131	1	12	1	5	29	369	24	N
Fvb1:13053874-13054263	TE_struc_177	Fvb1	13053874	13054263	390	366	124	0.407	.	AAUGUAGGACCACGUCAGAUUGCC	56	19	5	10	11	43	278	24	N
Fvb1:13070658-13071041	TE_struc_180	Fvb1	13070658	13071041	384	75	47	0.453	.	ACUGAUGGGUCGCACAAGACACGU	16	0	5	6	1	8	55	24	N
Fvb1:13071339-13071460	TE_homo_6005	Fvb1	13071339	13071460	122	88	44	0.432	.	CUGUGAAGUUUGAACCUAUAACCU	14	0	0	3	3	12	70	24	N
Fvb1:13080932-13081024	TE_homo_6013	Fvb1	13080932	13081024	93	112	36	0.607	.	UGUUGAGAUUAUAGAUUCAAGCCU	19	3	0	2	0	9	98	24	N
Fvb1:13082700-13082962	TE_homo_6019	Fvb1	13082700	13082962	263	24	18	0.833	+	AUGUAAUGCUAGCUAAAAAGAGA	4	2	0	2	0	6	14	24	N
Fvb1:13084262-13084465	TE_homo_6023	Fvb1	13084262	13084465	204	77	53	0.117	-	AAUUAUGGGGAAUCUGACUUUUGC	4	4	0	2	2	4	65	24	N
Fvb1:13085156-13085950	TE_struc_181	Fvb1	13085156	13085950	795	39	19	0.718	.	AAGCACCGCUAUGGAAAGUAGGGC	7	1	0	0	1	3	34	24	N
Fvb1:13087167-13087313	TE_homo_6025	Fvb1	13087167	13087313	147	145	96	0.503	.	UUUUUUUGGUCCAGUAGAUUCUCC	6	17	4	10	2	22	90	24	N
Fvb1:13124035-13124401	TE_homo_6058	Fvb1	13124035	13124401	367	479	251	0.676	.	CGUACGGUGGCAAACGGAGGGACG	28	27	5	80	36	65	266	24	N
Fvb1:13124303-13124664	TE_homo_6059	Fvb1	13124303	13124664	362	292	160	0.815	+	AAAACUGGAAUUCAGCGGACUCGC	24	9	4	17	23	61	178	24	N
Fvb1:13125639-13125972	TE_homo_6066	Fvb1	13125639	13125972	334	236	117	0.763	.	AGCUGCUGGAGUCCGCUGGGGUGG	33	6	5	32	20	22	151	24	N
Fvb1:13149148-13149532	TE_homo_6075	Fvb1	13149148	13149532	385	218	84	0.734	.	ACGGAAUUUUAGCAAUUGGGCUUG	29	2	2	14	7	29	164	24	N
Fvb1:13198219-13198308	TE_homo_6099	Fvb1	13198219	13198308	90	12	10	0.417	.	AAUGUUCACUUAGUCUGUUAUUGA	2	1	0	0	0	1	10	24	N
Fvb1:13216335-13216701	TE_homo_6111	Fvb1	13216335	13216701	367	50	34	0.82	+	AGUAGCAAAUUUGAUGUAAAGGUA	5	0	1	0	0	7	42	24	N
Fvb1:13224559-13224756	TE_homo_6118	Fvb1	13224559	13224756	198	693	152	0.38	.	GAAUAGAGGAUCACGUCAGACAGC	125	24	10	25	13	77	544	24	N
Fvb1:13228039-13228427	TE_struc_184	Fvb1	13228039	13228427	389	325	115	0.815	+	AUUAAAGGUCAAUUCAAACGGAAU	55	2	7	10	7	38	261	24	N
Fvb1:13228566-13228714	TE_homo_6120	Fvb1	13228566	13228714	149	18	17	0.667	.	AUAGCAUCUCCAACAGUUUUCCUU	2	2	0	0	1	2	13	24	N
Fvb1:13229998-13230127	TE_homo_6123	Fvb1	13229998	13230127	130	13	10	0.154	-	ACACUUACGAGCAAAUGCAACAUU	3	0	0	1	0	1	11	24	N
Fvb1:13230718-13230868	TE_homo_6124	Fvb1	13230718	13230868	151	69	39	0.435	.	AAUAGGAUUAAAUUCAGUUUGCCU	13	5	0	3	5	12	44	24	N
Fvb1:13248376-13249106	TE_homo_6141	Fvb1	13248376	13249106	731	300	174	0.447	.	AAUGUAUCUCUAGUAGCAACGCCU	26	7	8	6	6	51	222	24	N
Fvb1:13250386-13250772	TE_struc_186	Fvb1	13250386	13250772	387	542	194	0.572	.	AAAGUGUAGGGACUAACAUGAAGU	37	35	4	27	15	66	395	24	N
Fvb1:13280969-13281312	TE_homo_6155	Fvb1	13280969	13281312	344	96	58	0.448	.	AUGAAACCCUCUGAACUUAGGCCU	13	3	1	1	3	6	82	24	N
Fvb1:13314664-13315250	TE_struc_188	Fvb1	13314664	13315250	587	97	69	0.433	.	ACCCGAUUCAAAAACCUGAAUACU	5	9	2	2	1	14	69	24	N
Fvb1:13369047-13369119	TE_homo_6202	Fvb1	13369047	13369119	73	19	13	0.737	.	AUGUGUGAACACCUAGAUCUGCCU	3	0	0	1	0	4	14	24	N
Fvb1:13373350-13373530	TE_homo_6207	Fvb1	13373350	13373530	181	25	21	0.12	-	UUGUACUGAGGAUUUUUGUGAUU	3	0	1	1	3	6	14	24	N
Fvb1:13373808-13373990	TE_homo_6209	Fvb1	13373808	13373990	183	46	31	0.478	.	AUCGGUACAAGGAUGAUCCACAUG	8	1	4	1	0	4	36	24	N
Fvb1:13399093-13399343	TE_homo_6230	Fvb1	13399093	13399343	251	99	51	0.717	.	GAGGACUAAUGUUGUAACUAAUU	10	2	0	1	2	30	64	24	N
Fvb1:13423754-13423859	TE_homo_6263	Fvb1	13423754	13423859	106	1	1	1	+	CGAAAAAUUGAUUCGUCGGCCUGU	1	0	0	0	0	0	1	24	N
Fvb1:13424087-13424268	TE_homo_6264	Fvb1	13424087	13424268	182	32	22	0.688	.	GUCCGAACUAGUAUGUACAUGUGC	4	1	0	1	0	5	25	24	N
Fvb1:13425388-13425953	TE_struc_190	Fvb1	13425388	13425953	566	38	30	0.368	.	GAUGAUUAAGAUGAGAUGAGUAUU	4	0	0	2	1	6	29	24	N
Fvb1:13436246-13436564	TE_homo_6271	Fvb1	13436246	13436564	319	16	15	0.375	.	GAACGGUUUGAACAUUGAUUUAC	2	0	0	0	0	6	10	24	N
Fvb1:13462931-13463036	TE_homo_6296	Fvb1	13462931	13463036	106	22	16	0.773	.	AAAAAAACUGCAGAAACUUUCGGC	4	1	2	2	3	1	13	24	N
Fvb1:13464602-13464927	TE_homo_6300	Fvb1	13464602	13464927	326	8	8	0.5	.	AAGUUUUUACUCGUUGGCUAAAGC	1	0	0	1	0	3	4	24	N
Fvb1:13473239-13473407	TE_homo_6317	Fvb1	13473239	13473407	169	7	7	0.714	.	CGGCUAAGAGGAUGUCAACGACAG	1	0	0	1	0	1	5	24	N
Fvb1:13479063-13479673	TE_homo_6324	Fvb1	13479063	13479673	611	72	50	0.681	.	AGUAGGCUGUAUGGGCUGCAACCU	10	5	9	1	2	12	43	24	N
Fvb1:13493192-13493540	TE_homo_6329	Fvb1	13493192	13493540	349	112	49	0.571	.	AUGUCAAACCUACACCGUUCAAGA	25	1	0	2	4	9	96	24	N
Fvb1:13495607-13495757	TE_homo_6335	Fvb1	13495607	13495757	151	198	100	0.485	.	UUCCCGGACGACAGCACAGGCUUU	16	4	0	36	41	25	92	24	N
Fvb1:13495682-13495982	TE_homo_6336	Fvb1	13495682	13495982	301	1111	305	0.618	.	AAAACUGGAAUUCGGCGGACUCGC	399	69	9	124	115	101	693	24	N
Fvb1:13505967-13506280	TE_homo_6346	Fvb1	13505967	13506280	314	146	83	0.521	.	AGCCAUGACUUGUUUUACUGUUUU	9	1	3	2	3	23	114	24	N
Fvb1:13513971-13514635	TE_struc_192	Fvb1	13513971	13514635	665	227	149	0.551	.	ACGGGAUAGAUUUUUAAAAACGCC	20	11	3	15	3	25	170	24	N
Fvb1:13581459-13581846	TE_homo_6391	Fvb1	13581459	13581846	388	135	28	0.081	-	AGAGAACGGAGACUGAAAUGAAGU	75	1	1	0	0	6	127	24	N
Fvb1:13589047-13589321	TE_homo_6405	Fvb1	13589047	13589321	275	67	47	0.627	.	AGACCGGAUCAGAAGCAGACAUCU	7	0	0	2	0	9	56	24	N
Fvb1:13633242-13633652	TE_homo_6417	Fvb1	13633242	13633652	411	1633	434	0.397	.	AUACUAGUCCGGACGCAAGUAUCU	115	41	16	59	29	220	1268	24	N
Fvb1:13670248-13670499	TE_homo_6436	Fvb1	13670248	13670499	252	42	32	0.833	+	AGGGCUUAAGAAUAAACAUACCGU	4	2	1	0	1	4	34	24	N
Fvb1:13670782-13671233	TE_homo_6438	Fvb1	13670782	13671233	452	114	70	0.535	.	AUUGGAAUGUAGGACUACGUCAUA	6	3	2	4	2	8	95	24	N
Fvb1:13747672-13747991	TE_homo_6489	Fvb1	13747672	13747991	320	3	3	1	+	AUCGAAAUGAAAAGAUUUUGGAUG	1	0	0	0	1	0	2	24	N
Fvb1:13770466-13770755	TE_homo_6508	Fvb1	13770466	13770755	290	108	83	0.5	.	AUACACAAUACUGAUCAGGUGCGG	9	16	0	12	6	8	66	24	N
Fvb1:13770511-13770854	TE_homo_6509	Fvb1	13770511	13770854	344	136	105	0.647	.	AGCUGCUGGAGUCCGUUGGGGUGG	4	17	0	14	7	12	86	24	N
Fvb1:13775157-13775542	TE_homo_6511	Fvb1	13775157	13775542	386	211	117	0.389	.	AAACGGAAUAUGAGAAUUUGAGCA	19	6	4	13	3	19	166	24	N
Fvb1:13776982-13777126	TE_homo_6519	Fvb1	13776982	13777126	145	22	15	0.864	+	GGGGAUUGCUUGUUUCUUGAAAUU	7	1	0	1	1	1	18	24	N
Fvb1:13797248-13797633	TE_homo_6535	Fvb1	13797248	13797633	386	3	2	1	+	CCAAAUGUCCUAUAUUCUGUCCAA	2	0	0	0	0	0	3	24	N
Fvb1:13799149-13799428	TE_homo_6536	Fvb1	13799149	13799428	280	12	11	0.833	+	AUCUAAAUUAAAAAUCGUUAAGAU	2	0	0	0	0	0	12	24	N
Fvb1:13799630-13799924	TE_struc_194	Fvb1	13799630	13799924	295	66	24	0.939	+	AGGGACUAACAUGAAUUCACCUCU	24	1	0	4	1	0	60	24	N
Fvb1:13800829-13800998	TE_homo_6541	Fvb1	13800829	13800998	170	31	13	0.581	.	ACAUCAGUCGGGUCCAAUUUCUGA	8	0	0	0	0	7	24	24	N
Fvb1:13810848-13810982	TE_homo_6552	Fvb1	13810848	13810982	135	3	3	0.667	.	ACGAAAAAUUGUUUUCGUCGGCCU	1	0	0	0	0	1	2	24	N
Fvb1:13811060-13811231	TE_homo_6554	Fvb1	13811060	13811231	172	25	21	0.52	.	UGUCACCGAAACCGUUUGAGCUGA	3	0	1	2	1	6	15	24	N
Fvb1:13830996-13831167	TE_homo_6566	Fvb1	13830996	13831167	172	3	3	0.667	.	GCGGAAAUUUUUAUGCACUCU	1	0	0	1	0	0	2	24	N
Fvb1:13832897-13833406	TE_homo_6569	Fvb1	13832897	13833406	510	147	87	0.599	.	GAUCAAUUCGCGGCUUUUUCGGAU	10	4	3	6	0	20	114	24	N
Fvb1:13833126-13833482	TE_homo_6571	Fvb1	13833126	13833482	357	236	110	0.809	+	UUAGAACAAAGUGCAUGAUAACGU	36	6	3	8	3	35	181	24	N
Fvb1:13843699-13844157	TE_homo_6576	Fvb1	13843699	13844157	459	14	13	0.571	.	CAAACAAAGGAAAUGAACAACUU	2	0	0	0	0	5	9	24	N
Fvb1:13862838-13863669	TE_struc_195	Fvb1	13862838	13863669	832	316	170	0.703	.	AAAAUUUUAUGUAGAAACUUGGGC	29	11	8	6	8	41	242	24	N
Fvb1:13864497-13864760	TE_homo_6578	Fvb1	13864497	13864760	264	10	9	0.7	.	GUUCCCGUCCCCGUCCCCUUUAGG	2	0	0	0	0	3	7	24	N
Fvb1:13881085-13881640	TE_homo_6582	Fvb1	13881085	13881640	556	34	22	0.441	.	UCUGAUAAACCCUAGGAGUGCGGC	7	2	0	1	0	3	28	24	N
Fvb1:13881759-13882138	TE_homo_6584	Fvb1	13881759	13882138	380	183	71	0.377	.	ACACAAUGACUAUUAAGGACACUG	23	8	0	9	1	17	148	24	N
Fvb1:13884623-13885130	TE_homo_6586	Fvb1	13884623	13885130	508	107	56	0.72	.	AUACCGAUUGUUGUUGAUACCGAU	32	5	1	0	1	12	88	24	N
Fvb1:13907767-13908082	TE_homo_6616	Fvb1	13907767	13908082	316	3	3	0.333	.	UACGAUCAUGGGCGUAGGGAGAGG	1	0	0	0	0	1	2	24	N
Fvb1:13908210-13908507	TE_homo_6618	Fvb1	13908210	13908507	298	33	31	0.697	.	UACUGGAAGACUUAGCUGAAGCCU	3	4	0	2	1	5	21	24	N
Fvb1:13937551-13937710	TE_homo_6656	Fvb1	13937551	13937710	160	3	2	1	+	UUCAAUUGCAAGUUUACUGACCCU	2	0	0	0	0	0	3	24	N
Fvb1:13953456-13953852	TE_homo_6668	Fvb1	13953456	13953852	397	22	16	0.545	.	AAACGGGCUGCUAAGCACAAGCAC	5	2	0	0	1	1	18	24	N
Fvb1:13962835-13962921	TE_homo_6681	Fvb1	13962835	13962921	87	43	27	0.372	.	AUAACUUUUUGCGUCCGUCACUGA	9	0	0	1	0	6	36	24	N
Fvb1:13977901-13978107	TE_homo_6691	Fvb1	13977901	13978107	207	13	11	0.538	.	CUUCUAAAGUCGACGAAACAGAUU	2	0	1	0	0	2	10	24	N
Fvb1:13980405-13980523	TE_homo_6698	Fvb1	13980405	13980523	119	27	11	0.815	+	GAUGAAAAAAUAAUUUGUCGGCCU	8	0	2	0	3	6	16	24	N
Fvb1:14002826-14003059	TE_homo_6703	Fvb1	14002826	14003059	234	110	72	0.509	.	AGACGACCGAGAUGUCAAUGGACG	7	9	1	1	3	13	83	24	N
Fvb1:14003055-14003366	TE_homo_6704	Fvb1	14003055	14003366	312	171	109	0.515	.	AGACGACCGAGAUGUCAAUGGACG	7	11	4	2	8	27	119	24	N
Fvb1:14010708-14010959	TE_homo_6705	Fvb1	14010708	14010959	252	3	2	1	+	AGAGGUUUUACUGUAACACAAGUG	2	0	0	0	0	0	3	24	N
Fvb1:14011770-14012085	TE_homo_6709	Fvb1	14011770	14012085	316	21	13	0.667	.	GUAAUGUCAUUUGUAGAAACUUA	3	0	0	0	0	6	15	24	N
Fvb1:14014464-14014565	TE_homo_6715	Fvb1	14014464	14014565	102	57	23	0.702	.	CGAGAGAAAGAGGAAAUGAACACU	12	1	0	1	2	7	46	24	N
Fvb1:14029311-14029480	TE_homo_6734	Fvb1	14029311	14029480	170	13	9	0.308	.	AGUGUGGAUUUUAAUUUGGAGAGU	3	0	0	0	0	1	12	24	N
Fvb1:14112229-14112975	TE_homo_6763	Fvb1	14112229	14112975	747	70	50	0.243	.	GAGAAAAUGAUAUUUUAGGUAUUG	3	0	0	3	1	20	46	24	N
Fvb1:14115878-14116005	TE_homo_6769	Fvb1	14115878	14116005	128	63	39	0.524	.	UGUCGGGCGUGUCGGACACUCC	5	7	0	4	5	2	45	24	N
Fvb1:14126096-14126213	TE_homo_6778	Fvb1	14126096	14126213	118	130	63	0.792	.	GAUUAAGAGAUAUAUGGUGAACCC	47	4	2	9	1	20	94	24	N
Fvb1:14140645-14141035	TE_homo_6787	Fvb1	14140645	14141035	391	186	102	0.183	-	AUGUAACAUGAUUAGUAUGAAAGU	19	3	0	3	3	30	147	24	N
Fvb1:14145159-14145342	TE_homo_6789	Fvb1	14145159	14145342	184	649	141	0.445	.	AAUCAUCGUUGGAUGUAAAUCCAA	140	9	8	5	6	71	550	24	N
Fvb1:14145347-14145511	TE_homo_6790	Fvb1	14145347	14145511	165	34	22	0.471	.	CAUGUGAACACUACUGUAUUAAGC	5	0	0	2	1	9	22	24	N
Fvb1:14184190-14184398	TE_homo_6803	Fvb1	14184190	14184398	209	1	1	1	+	AGAAAUUAGAUCCUGGAUUCAGCU	1	0	0	0	0	0	1	24	N
Fvb1:14186185-14186404	TE_homo_6805	Fvb1	14186185	14186404	220	46	28	0.609	.	ACUAGAGACUAAGGAACCAAUUUC	4	1	0	2	0	12	31	24	N
Fvb1:14242842-14243023	TE_homo_6852	Fvb1	14242842	14243023	182	46	22	0.87	+	GAUGAAUUCCUGAACGCCUGAUUU	13	5	1	0	2	1	37	24	N
Fvb1:14246223-14246666	TE_homo_6855	Fvb1	14246223	14246666	444	5	5	0.6	.	UGAUUUGGUGAUCGUUAAGGCUUU	1	0	1	0	0	0	4	24	N
Fvb1:14307729-14308025	TE_homo_6863	Fvb1	14307729	14308025	297	182	110	0.582	.	GAGUGGUCCCCACAUGUUAUAGGU	11	7	3	11	4	28	129	24	N
Fvb1:14326547-14326715	TE_homo_6870	Fvb1	14326547	14326715	169	10	10	0.6	.	AAAACCGCGAAAAUUUCUGAAAAC	1	0	0	0	0	1	9	24	N
Fvb1:14328438-14328813	TE_homo_6875	Fvb1	14328438	14328813	376	209	91	0.847	+	AUAAAAUUCUGAGAUUUUGGUACC	40	8	4	4	6	14	173	24	N
Fvb1:14328668-14329005	TE_homo_6877	Fvb1	14328668	14329005	338	276	119	0.83	+	AUAAAAUUCUGAGAUUUUGGUACC	40	13	4	6	5	20	228	24	N
Fvb1:14357625-14358015	TE_homo_6896	Fvb1	14357625	14358015	391	117	66	0.761	.	CAACCCGGACAAGGAAACAAGAGU	21	5	2	3	2	12	93	24	N
Fvb1:14390268-14390976	TE_struc_205	Fvb1	14390268	14390976	709	312	139	0.651	.	CAGGGACGGAGCAUAGUUAUACUC	39	8	2	13	4	36	249	24	N
Fvb1:14392319-14392422	TE_homo_6923	Fvb1	14392319	14392422	104	28	16	0.893	+	AACUGCAGAAACUUUCGGCCACCU	9	0	1	0	0	5	22	24	N
Fvb1:14434213-14434722	TE_homo_6958	Fvb1	14434213	14434722	510	67	43	0.239	.	AAACUCGAUUAGGCAGGCCGGACC	6	2	0	1	4	7	53	24	N
Fvb1:14439704-14439882	TE_homo_6963	Fvb1	14439704	14439882	179	17	13	0.529	.	GAGAUAUACUUGGUAGAACAUACU	3	0	0	0	0	4	13	24	N
Fvb1:14452719-14453009	TE_homo_6964	Fvb1	14452719	14453009	291	83	47	0.169	-	AGAAGCUGUUGGACCACAAAACAA	21	7	3	4	4	9	56	24	N
Fvb1:14453190-14454016	TE_struc_207	Fvb1	14453190	14454016	827	61	42	0.574	.	ACGGGACAGAUUUUUAAAAACACC	7	1	1	2	1	3	53	24	N
Fvb1:14459688-14459823	TE_homo_6976	Fvb1	14459688	14459823	136	19	14	0.579	.	AGAGAAACUGUUGGAGUUAGAGCA	4	2	0	0	0	2	15	24	N
Fvb1:14504673-14504968	TE_struc_208	Fvb1	14504673	14504968	296	212	104	0.632	.	GAUGAAAUUAAAAGUUUAGGGACU	39	9	3	8	4	18	170	24	N
Fvb1:14506800-14507186	TE_struc_209	Fvb1	14506800	14507186	387	91	34	0.209	.	AAAGUGUAGGGACUAACAUGAAGU	37	2	2	11	1	9	66	24	N
Fvb1:14543619-14544035	TE_homo_7035	Fvb1	14543619	14544035	417	180	80	0.4	.	AUGAGGACCACUAAGUUGAGGACU	19	3	4	4	2	21	146	24	N
Fvb1:14565610-14565800	TE_homo_7037	Fvb1	14565610	14565800	191	21	19	0.81	+	AACGAACCAGAGAAUAUCCUUGCU	3	1	1	1	2	2	14	24	N
Fvb1:14656801-14656952	TE_homo_7117	Fvb1	14656801	14656952	152	3	3	0.667	.	AAUAGUGUGUGGAUUUCAAUAUGG	1	0	0	0	0	1	2	24	N
Fvb1:14657054-14657692	TE_struc_210	Fvb1	14657054	14657692	639	79	57	0.582	.	GUCUUAAACUGAUCCGAACCGAAC	7	1	2	0	1	8	67	24	N
Fvb1:14657733-14657858	TE_homo_7118	Fvb1	14657733	14657858	126	19	11	0.895	+	AGAUGGCAUCAGAACAAAGGAACC	5	0	0	0	1	3	15	24	N
Fvb1:14658185-14658560	TE_homo_7120	Fvb1	14658185	14658560	376	1	1	1	+	CGGGUUUCGGACCCCAUUUGGGUU	1	0	0	0	0	0	1	24	N
Fvb1:14658692-14658843	TE_homo_7121	Fvb1	14658692	14658843	152	9	6	0.889	+	CUCGGACCCCCUAAGUGAAAAUCU	3	0	0	0	0	0	9	24	N
Fvb1:14660058-14660194	TE_homo_7123	Fvb1	14660058	14660194	137	30	19	0.1	-	GAGAGAGAGAUGAUUGGAUGGUCU	6	2	1	2	1	3	21	24	N
Fvb1:14669946-14670207	TE_homo_7129	Fvb1	14669946	14670207	262	13	11	0.615	.	AAUGACACUAGAUUUUCGUACCUA	3	0	0	0	2	3	8	24	N
Fvb1:14746066-14746182	TE_homo_7163	Fvb1	14746066	14746182	117	26	21	0.385	.	AGAUUCCGUUUGAACAUGUAUAUU	3	2	1	0	0	0	23	24	N
Fvb1:14762062-14762500	TE_homo_7169	Fvb1	14762062	14762500	439	304	136	0.625	.	UUAAGUUGAGAACUAGUUGAAGAC	44	5	8	4	4	55	228	24	N
Fvb1:14765832-14765934	TE_homo_7171	Fvb1	14765832	14765934	103	1	1	1	+	GGAUGAAAUUGAUUAAGAUUGAAU	1	0	0	0	0	0	1	24	N
Fvb1:14770065-14770417	TE_homo_7182	Fvb1	14770065	14770417	353	141	91	0.511	.	AGGUUGAAUGCUAGCGUCUUCAGA	8	4	1	5	4	18	109	24	N
Fvb1:14775186-14775574	TE_homo_7186	Fvb1	14775186	14775574	389	263	122	0.513	.	AAUCAAUGGACGAACCAAAUCUGU	31	14	7	10	7	25	200	24	N
Fvb1:14786168-14786281	TE_homo_7197	Fvb1	14786168	14786281	114	26	11	0	-	CCUUUAAAUAUCGUUGGCUAAACC	10	0	0	2	1	6	17	24	N
Fvb1:14789943-14790111	TE_homo_7204	Fvb1	14789943	14790111	169	1	1	0	-	CUUCGUUAAAAUAGAUAUGGACGA	1	0	0	0	0	0	1	24	N
Fvb1:14825917-14826068	TE_homo_7225	Fvb1	14825917	14826068	152	6	6	0	-	AAAGCUGUUGGAGUUACUCUUCAA	1	0	0	0	0	0	6	24	N
Fvb1:14828704-14829366	TE_struc_213	Fvb1	14828704	14829366	663	189	77	0.942	+	AUGGGGAUCCUUAGUAUUCGGAUU	43	5	0	7	3	29	145	24	N
Fvb1:14836341-14836457	TE_homo_7234	Fvb1	14836341	14836457	117	39	35	0.641	.	AUCCCCGGUGAGUCUGUCGAAUUC	3	2	0	5	3	4	25	24	N
Fvb1:14891605-14891719	TE_homo_7252	Fvb1	14891605	14891719	115	164	57	0.22	.	AUCUAAUGUCAGUGAGCUGUGACU	78	11	3	6	8	13	123	24	N
Fvb1:14921204-14921304	TE_homo_7259	Fvb1	14921204	14921304	101	14	13	0.357	.	AUUCCUAGCUCCGUCCCUGGUAUU	2	0	0	1	0	3	10	24	N
Fvb1:14921323-14921543	TE_homo_7260	Fvb1	14921323	14921543	221	19	14	0.789	.	ACUUUGUCAUCUGUAUUCAAGUCU	4	0	1	0	0	3	15	24	N
Fvb1:14921572-14921706	TE_homo_7261	Fvb1	14921572	14921706	135	20	18	0.35	.	AGGCUAUCUGGGCUGUAACCCAAA	2	1	0	0	1	2	16	24	N
Fvb1:14939651-14939900	TE_homo_7283	Fvb1	14939651	14939900	250	121	42	0.769	.	CUAUUCGAGAUGCUCUAAACCAGA	34	4	0	5	0	9	103	24	N
Fvb1:15018361-15018657	TE_homo_7335	Fvb1	15018361	15018657	297	29	17	0.69	.	AGGAAUCUGUUAGAGCAAAACACC	9	0	2	0	0	3	24	24	N
Fvb1:15109071-15109235	TE_homo_7394	Fvb1	15109071	15109235	165	11	11	0.455	.	CAAGUACUAUAUGAAUUUAAACCU	1	1	0	1	0	3	6	24	N
Fvb1:15121731-15121908	TE_homo_7402	Fvb1	15121731	15121908	178	1097	230	0.606	.	AGUGAGGACUUUCAAAUGAACAGU	72	79	12	35	25	237	709	24	N
Fvb1:15122510-15122710	TE_homo_7403	Fvb1	15122510	15122710	201	43	12	0.767	.	AGGGAAUCUGUUGGAGCAAAACAA	25	0	1	0	0	6	36	24	N
Fvb1:15134951-15135124	TE_homo_7415	Fvb1	15134951	15135124	174	146	78	0.555	.	AAACAUUGAUUGUAGUAGGAUCUU	14	9	0	16	3	18	100	24	N
Fvb1:15145076-15145300	TE_homo_7422	Fvb1	15145076	15145300	225	1	1	0	-	ACACGUGUCAAUCAUGUAGAGACU	1	0	0	0	0	0	1	24	N
Fvb1:15178410-15178571	TE_homo_7442	Fvb1	15178410	15178571	162	2	2	1	+	AAUGACCUUUGCGCACUAAAACAG	1	0	0	0	0	0	2	24	N
Fvb1:15207516-15207930	TE_homo_7454	Fvb1	15207516	15207930	415	36	29	0.472	.	CGGCAAAGUGGCUCUGAUACCAUU	4	1	1	1	0	2	31	24	N
Fvb1:15261939-15262058	TE_homo_7475	Fvb1	15261939	15262058	120	547	160	0.411	.	ACAUCCAACGGUGAUUGAUCAGGA	63	12	8	12	10	89	416	24	N
Fvb1:15268762-15268945	TE_homo_7479	Fvb1	15268762	15268945	184	32	22	0.344	.	AGGUGAACAUGACUGAUUAUCAGC	7	5	0	3	1	5	18	24	N
Fvb1:15286879-15287242	TE_homo_7492	Fvb1	15286879	15287242	364	29	17	0.655	.	AGAGAAACGUACGCCGUCGUCGGC	5	0	0	2	0	0	27	24	N
Fvb1:15288146-15288264	TE_homo_7497	Fvb1	15288146	15288264	119	28	20	0.571	.	UAGUCCGGAUCUAGCGAAGACCUC	3	0	0	3	3	2	20	24	N
Fvb1:15288284-15288555	TE_homo_7498	Fvb1	15288284	15288555	272	17	15	0.529	.	UGGCGACUGGAAACUGGUAUACGG	2	1	0	1	1	3	11	24	N
Fvb1:15292005-15292716	TE_struc_216	Fvb1	15292005	15292716	712	172	73	0.116	-	AAAUGUUCGACGGCACGUGAGAGA	28	2	1	5	2	7	155	24	N
Fvb1:15293505-15293619	TE_homo_7502	Fvb1	15293505	15293619	115	168	62	0.536	.	ACUAACAACUUUGAGAUCACGGGU	18	2	2	1	5	21	137	24	N
Fvb1:15332723-15332847	TE_homo_7510	Fvb1	15332723	15332847	125	116	53	0.474	.	AACUAACAACUUUGAGAUCAUGAG	11	2	8	3	0	6	97	24	N
Fvb1:15413293-15413508	TE_homo_7568	Fvb1	15413293	15413508	216	132	93	0.295	.	AUUCCGACAGAGAAGAAUUCCAGC	12	18	1	5	5	18	85	24	N
Fvb1:15424085-15424232	TE_homo_7572	Fvb1	15424085	15424232	148	8	7	0.125	-	UCUUGAGGGCAAGUAUGAACAACU	2	1	0	0	1	2	4	24	N
Fvb1:15442235-15442355	TE_homo_7579	Fvb1	15442235	15442355	121	5	4	0.6	.	AUUAGUCUAGCGCAGGGCCGGCCC	2	0	0	0	0	0	5	24	N
Fvb1:15442720-15443208	TE_homo_7582	Fvb1	15442720	15443208	489	29	23	0.724	.	AACUUGACCUGUGUGAUUCGAACC	4	0	0	1	1	1	26	24	N
Fvb1:15453078-15453645	TE_homo_7590	Fvb1	15453078	15453645	568	34	27	0.5	.	CAAGAUGAAAUUGUUAUCAGGGCU	3	1	0	2	0	5	26	24	N
Fvb1:15475024-15475297	TE_homo_7609	Fvb1	15475024	15475297	274	8	7	0.625	.	AUUCGUCGGCUAAAGUUUGGCAGA	2	0	0	0	0	0	8	24	N
Fvb1:15503375-15503537	TE_homo_7622	Fvb1	15503375	15503537	163	64	41	0.562	.	AGAUAGUGUCAUUAGGUGGUCAAG	5	0	1	2	1	5	55	24	N
Fvb1:15504176-15504510	TE_homo_7624	Fvb1	15504176	15504510	335	26	23	0.5	.	AUCAACGUGCGGGGUGAGGAAAGU	3	1	1	0	2	1	21	24	N
Fvb1:15506067-15506260	TE_homo_7628	Fvb1	15506067	15506260	194	127	62	0.606	.	CUCUACUACUAUAAAGCCAGGCCC	23	9	3	7	4	16	88	24	N
Fvb1:15535123-15535301	TE_homo_7660	Fvb1	15535123	15535301	179	110	42	0.545	.	AUCCAACGGUAAAUGAACAUGAUU	14	2	2	2	1	27	76	24	N
Fvb1:15561791-15562278	TE_homo_7690	Fvb1	15561791	15562278	488	132	77	0.583	.	AGUGGCCGAUCCAAGAUCCGAGAA	9	4	3	6	1	17	101	24	N
Fvb1:15563011-15563351	TE_homo_7692	Fvb1	15563011	15563351	341	105	80	0.571	.	GUCUUCGUCGACGUCGGACGGUGA	5	8	0	5	4	16	72	24	N
Fvb1:15578094-15578189	TE_homo_7714	Fvb1	15578094	15578189	96	36	18	0.639	.	CACAGUAAGAAUAAAUGCGGACAU	7	3	0	6	1	4	22	24	N
Fvb1:15602475-15602591	TE_homo_7729	Fvb1	15602475	15602591	117	7	5	0.571	.	AGAAGUUAUGGUUGUUUUAGUGCA	2	0	0	0	0	0	7	24	N
Fvb1:15602659-15602845	TE_homo_7730	Fvb1	15602659	15602845	187	17	10	0.706	.	UUCCAAUGAUAUAAAGCUCACUGU	6	0	0	0	1	2	14	24	N
Fvb1:15606871-15607380	TE_homo_7735	Fvb1	15606871	15607380	510	19	16	0.579	.	ACUCGGAUUGCUUGAUCUAAAACU	2	1	0	1	0	4	13	24	N
Fvb1:15607100-15607456	TE_homo_7737	Fvb1	15607100	15607456	357	38	20	0.763	.	GUGCAUGAUAACGUGAUGAAGGAU	15	1	0	0	2	4	31	24	N
Fvb1:15612789-15612968	TE_homo_7746	Fvb1	15612789	15612968	180	47	22	0.723	.	UUUAAUCACAAAAGGCCUCGGUAC	12	2	0	0	1	5	39	24	N
Fvb1:15613210-15613387	TE_homo_7747	Fvb1	15613210	15613387	178	7	5	0	-	ACCUUAAAGGUGGUUAAGUUGGGA	3	0	0	0	0	0	7	24	N
Fvb1:15623260-15624257	TE_homo_7757	Fvb1	15623260	15624257	998	49	21	0.735	.	AGAGAAUGAGAGGUAUACUGAGCA	19	0	0	1	0	2	46	24	N
Fvb1:15634325-15634767	TE_homo_7766	Fvb1	15634325	15634767	443	39	23	0.923	+	UAAGAUAUGAACGGUGGAGAUG	13	3	4	1	14	1	16	24	N
Fvb1:15639214-15639398	TE_homo_7773	Fvb1	15639214	15639398	185	299	99	0.478	.	AAUCACCGUUGGAUGUAAAUUCAU	70	8	3	9	6	33	240	24	N
Fvb1:15653129-15653545	TE_struc_225	Fvb1	15653129	15653545	417	294	129	0.371	.	GAGAAGCUGCUGGAUUUUGAUCAU	21	3	11	13	5	52	210	24	N
Fvb1:15665264-15665377	TE_homo_7795	Fvb1	15665264	15665377	114	19	13	0.316	.	AAUAUCGUCGGCAAAAGUUGCUGU	4	0	0	0	0	2	17	24	N
Fvb1:15729401-15729491	TE_homo_7818	Fvb1	15729401	15729491	91	143	51	0.238	.	ACGUGUCGUUGUGUGACUGGUGGG	34	2	0	1	3	12	125	24	N
Fvb1:15729494-15729673	TE_homo_7819	Fvb1	15729494	15729673	180	13	12	0.692	.	AUAUUUUCAAACGGUGGAGGCGGC	2	0	1	1	1	2	8	24	N
Fvb1:15738351-15738690	TE_homo_7827	Fvb1	15738351	15738690	340	215	92	0.484	.	AUAGUCAUUGUAGUUUGAAAUCGA	24	8	3	1	4	26	173	24	N
Fvb1:15760542-15760627	TE_homo_7837	Fvb1	15760542	15760627	86	144	55	0.562	.	GAUCACAAUCACUGAUUUGGCUGA	15	0	3	3	1	21	116	24	N
Fvb1:15795551-15795665	TE_homo_7851	Fvb1	15795551	15795665	115	803	246	0.42	.	AUAUGUCCGUGAGGUUUGAACCCG	180	23	4	38	14	105	619	24	N
Fvb1:15802408-15802678	TE_homo_7857	Fvb1	15802408	15802678	271	40	13	0.8	+	AGGGACUAACAUGAAUUCACCUCU	21	1	0	0	0	2	37	24	N
Fvb1:15809713-15810162	TE_homo_7871	Fvb1	15809713	15810162	450	334	163	0.201	.	GAAGAGCCUCGUAUUUAUGGACGG	16	15	7	12	10	59	231	24	N
Fvb1:15813805-15814198	TE_homo_7874	Fvb1	15813805	15814198	394	232	115	0.379	.	AACAAUGAGAUCAAUUCUAAGACU	43	4	3	4	4	28	189	24	N
Fvb1:15846550-15846992	TE_homo_7894	Fvb1	15846550	15846992	443	24	14	0.75	.	AGGGCCAUGUAUAUAUAUUACUCU	5	0	0	0	1	5	18	24	N
Fvb1:15852841-15853013	TE_homo_7896	Fvb1	15852841	15853013	173	18	13	0.556	.	UCGAGAAUCAGGUCGGCUUGACUC	5	0	1	1	0	1	15	24	N
Fvb1:15854615-15855052	TE_homo_7898	Fvb1	15854615	15855052	438	21	13	0.667	.	UAGGGAGGAUUUAAAGAGGACAUC	3	2	0	0	1	2	16	24	N
Fvb1:15855123-15855417	TE_homo_7901	Fvb1	15855123	15855417	295	95	69	0.305	.	AGACGUCCGCCUCUGAUCCGGCCU	8	6	0	12	0	8	69	24	N
Fvb1:15868019-15868234	TE_homo_7909	Fvb1	15868019	15868234	216	69	47	0.681	.	CCAUAAGAGAAACGAUGAAGCACC	5	7	0	3	5	13	41	24	N
Fvb1:15912008-15912116	TE_homo_7930	Fvb1	15912008	15912116	109	34	27	0.235	.	UGGAGUUGUAGAAGAAAUAUUGCU	3	0	0	0	1	2	31	24	N
Fvb1:15946558-15946852	TE_homo_7948	Fvb1	15946558	15946852	295	26	19	0.577	.	AAUUGGACAAGAAAAUUGAUUUCU	5	1	0	0	0	4	21	24	N
Fvb1:15961271-15961621	TE_homo_7955	Fvb1	15961271	15961621	351	164	98	0.232	.	AUCCCCUGAAGAAUCUGUCAAAAU	23	14	4	3	4	19	120	24	N
Fvb1:15967586-15968083	TE_homo_7960	Fvb1	15967586	15968083	498	46	21	0.652	.	UGGUUCCGUCCCUGGUGUGCGCGA	11	0	0	5	2	3	36	24	N
Fvb1:15994557-15994855	TE_homo_7981	Fvb1	15994557	15994855	299	131	70	0.351	.	AAAAACUAAACAGAUGUCGAAUUC	17	4	2	0	1	18	106	24	N
Fvb1:16001015-16001268	TE_homo_7992	Fvb1	16001015	16001268	254	41	35	0.317	.	CGCCGUCGACUAACAGAGAAAGAA	3	1	0	4	2	4	30	24	N
Fvb1:16035773-16035912	TE_homo_8011	Fvb1	16035773	16035912	140	133	50	0.669	.	AAUGGCGGAUCCAGGAUUCAAAGA	25	4	7	4	5	14	99	24	N
Fvb1:16040762-16041197	TE_homo_8014	Fvb1	16040762	16041197	436	264	97	0.708	.	AGAGAUCUCUCAUUGGAAGGGCCU	53	9	1	6	16	24	208	24	N
Fvb1:16065164-16065550	TE_struc_230	Fvb1	16065164	16065550	387	56	14	0.071	-	AAAGUGUAGGGACUAACAUGAAGU	37	2	0	0	0	4	50	24	N
Fvb1:16090453-16090881	TE_homo_8044	Fvb1	16090453	16090881	429	68	37	0.618	.	AGGGGGCUGAUCAUCAUAAUCUGU	9	1	0	4	6	6	51	24	N
Fvb1:16112628-16112781	TE_homo_8062	Fvb1	16112628	16112781	154	9	6	0.222	.	AUAGAGAGUUUGUUGUUAGGAGUU	3	0	0	0	0	1	8	24	N
Fvb1:16167492-16167902	TE_homo_8070	Fvb1	16167492	16167902	411	96	44	0.708	.	AGAGUAUGAGGACUGAAAUGAUGU	34	1	1	1	2	11	80	24	N
Fvb1:16194865-16194963	TE_homo_8082	Fvb1	16194865	16194963	99	11	10	0.545	.	AUAGCCCACCAUUUUUUUUUCCAA	2	0	1	1	0	0	9	24	N
Fvb1:16195118-16195436	TE_homo_8084	Fvb1	16195118	16195436	319	9	6	0.556	.	AUUCGCGGAGUGUGUUUGAUCACU	4	1	0	0	1	1	6	24	N
Fvb1:16209980-16210480	TE_homo_8106	Fvb1	16209980	16210480	501	214	106	0.654	.	AGACCUACAGAGGACGUCGUACGA	16	12	4	11	8	13	166	24	N
Fvb1:16235439-16235840	TE_homo_8110	Fvb1	16235439	16235840	402	386	122	0.689	.	AUGAGGACCCUAAAGUUGAGAACU	60	10	8	13	1	39	315	24	N
Fvb1:16263411-16263585	TE_homo_8132	Fvb1	16263411	16263585	175	10	4	0.2	.	GAGGUAUCAAACUGAUUUUAGACC	6	0	0	0	0	0	10	24	N
Fvb1:16269391-16269615	TE_homo_8137	Fvb1	16269391	16269615	225	29	22	0.241	.	UCGAACUAGUUUAAAUCAAUGGAC	5	0	0	0	0	5	24	24	N
Fvb1:16297100-16297519	TE_homo_8150	Fvb1	16297100	16297519	420	453	219	0.508	.	UUGACAAAUUUGGAUCGUCCAUU	18	8	12	12	7	98	316	24	N
Fvb1:16304273-16304461	TE_homo_8153	Fvb1	16304273	16304461	189	203	40	0.099	-	AGAAUAUGAGAAUUUGGUCACGGC	68	1	0	3	2	26	171	24	N
Fvb1:16304489-16304730	TE_homo_8154	Fvb1	16304489	16304730	242	37	19	0.649	.	GAUGAAAUUGAAAGUAUAGGGAUU	8	0	1	0	0	7	29	24	N
Fvb1:16304906-16305200	TE_struc_231	Fvb1	16304906	16305200	295	1058	273	0.71	.	GAUGAAAUUGAAAGUUUAGGGACU	195	26	14	46	26	140	806	24	N
Fvb1:16307620-16307817	TE_homo_8156	Fvb1	16307620	16307817	198	90	49	0.878	+	CUAAUCGAGAACCGGAACCGGAAC	11	3	2	4	5	2	74	24	N
Fvb1:16308114-16308546	TE_homo_8158	Fvb1	16308114	16308546	433	35	23	0.4	.	AAAACCGAUUAAGCCGAACUGAAC	5	0	0	2	0	0	33	24	N
Fvb1:16308776-16309186	TE_homo_8159	Fvb1	16308776	16309186	411	526	149	0.26	.	AAGAGAGAGACUGAAUGCACACA	52	23	4	7	13	160	319	24	N
Fvb1:16348398-16348902	TE_homo_8174	Fvb1	16348398	16348902	505	32	26	0.688	.	ACGUGUCGCUGUGUGACUGGUGGG	4	5	0	1	2	0	24	24	N
Fvb1:16361555-16361680	TE_homo_8181	Fvb1	16361555	16361680	126	84	47	0.571	.	AUCUAAAUAAUUAGGGCUGGGCAC	7	0	0	2	4	8	70	24	N
Fvb1:16361681-16362480	TE_struc_232	Fvb1	16361681	16362480	800	231	146	0.736	.	AUCUAAAUAAUUAGGGCUGGGCAC	7	6	0	14	10	30	171	24	N
Fvb1:16383738-16383824	TE_homo_8193	Fvb1	16383738	16383824	87	302	107	0.318	.	AUAGUCAUUGUGGUUUGAAGUCGA	34	5	1	6	8	38	244	24	N
Fvb1:16423430-16423569	TE_homo_8207	Fvb1	16423430	16423569	140	29	18	0.276	.	UAGAAUGAACCAAAUACGACGUGG	6	0	0	0	1	2	26	24	N
Fvb1:16444329-16444431	TE_homo_8216	Fvb1	16444329	16444431	103	143	59	0.392	.	AUCGGCUAUAGUCCCACAGUUAGC	22	2	2	3	8	22	106	24	N
Fvb1:16444890-16445245	TE_homo_8220	Fvb1	16444890	16445245	356	122	60	0.721	.	UCGGCUAAAGUUCUUUAUAUAGGC	17	7	8	3	7	7	90	24	N
Fvb1:16464666-16465063	TE_homo_8231	Fvb1	16464666	16465063	398	93	69	0.602	.	UUAAAACUGAACGGAUGAGAUGUC	5	4	2	3	3	10	71	24	N
Fvb1:16465379-16465574	TE_homo_8232	Fvb1	16465379	16465574	196	15	11	0.133	-	UUGUUGGUAACGAAUUUUUAAUU	3	0	0	0	1	4	10	24	N
Fvb1:16465575-16466272	TE_homo_8233	Fvb1	16465575	16466272	698	94	58	0.681	.	GAACGAUAGAUUGUGUGAAUUAGU	15	0	1	1	1	9	82	24	N
Fvb1:16466273-16466552	TE_homo_8234	Fvb1	16466273	16466552	280	24	20	0.292	.	GGCUCAUAUAAUAGAUCUAGAGGU	2	0	0	1	0	4	19	24	N
Fvb1:16544124-16544526	TE_struc_237	Fvb1	16544124	16544526	403	330	145	0.467	.	UUAGAUCGUAUAGAAGUAAUAUGU	20	10	8	10	12	53	237	24	N
Fvb1:16609427-16610049	TE_homo_8319	Fvb1	16609427	16610049	623	1267	388	0.247	.	AUAGCCUUUUGGCUAGCUCGGGCC	308	48	15	43	16	144	1001	24	N
Fvb1:16634275-16634556	TE_homo_8329	Fvb1	16634275	16634556	282	193	71	0.321	.	AGAGGACGAUGACAAGACUGUAAU	54	4	1	1	4	17	166	24	N
Fvb1:16666015-16666199	TE_homo_8348	Fvb1	16666015	16666199	185	45	29	0.467	.	CGACCGGAACAGUACCGAACCUGU	5	0	0	2	0	4	39	24	N
Fvb1:16728301-16728467	TE_homo_8408	Fvb1	16728301	16728467	167	194	70	0.613	.	AAUGAGGACCAAAUGAGAGAAUUU	28	12	5	3	6	7	161	24	N
Fvb1:16741878-16742142	TE_homo_8423	Fvb1	16741878	16742142	265	49	34	0.673	.	GUUGCCGAUGCCGGAGGGUGGAGA	3	4	1	0	1	6	37	24	N
Fvb1:16751428-16751665	TE_homo_8436	Fvb1	16751428	16751665	238	20	11	0.45	.	GAGGACUCAAUUACCACUUUAAGG	5	0	1	0	0	3	16	24	N
Fvb1:16751821-16752497	TE_struc_239	Fvb1	16751821	16752497	677	124	83	0.371	.	AGGACGGGCCGUGGGAUUACCUCU	10	0	0	1	5	10	108	24	N
Fvb1:16759151-16759328	TE_homo_8450	Fvb1	16759151	16759328	178	11	9	0.273	.	CGGACGUCCGCACUCGGCUUAAAG	2	2	0	1	0	0	8	24	N
Fvb1:16817791-16818014	TE_homo_8470	Fvb1	16817791	16818014	224	12	12	0.75	.	AGAAAGUUGUUUGAAAUGUUGAGA	1	0	1	1	1	0	9	24	N
Fvb1:16828319-16828435	TE_homo_8478	Fvb1	16828319	16828435	117	12	11	0.5	.	AUGGACUAUAUGAACUAAACGAUG	2	0	0	0	0	1	11	24	N
Fvb1:16836486-16836606	TE_homo_8484	Fvb1	16836486	16836606	121	22	16	0.227	.	AUAUGAACUAAACGAUGUAACCCU	4	0	0	0	0	2	20	24	N
Fvb1:16837094-16837410	TE_homo_8485	Fvb1	16837094	16837410	317	89	57	0.708	.	GACGGAAUGAUCAUUUGGAAGGAA	7	3	1	3	3	18	61	24	N
Fvb1:16837883-16838516	TE_struc_241	Fvb1	16837883	16838516	634	1008	343	0.651	.	AAACGGGUUCAUGAUUACGGAUUU	90	22	18	27	31	141	769	24	N
Fvb1:16863298-16863390	TE_homo_8501	Fvb1	16863298	16863390	93	28	18	0.786	.	GUCGGAGGCGUGUCGCCGUGUCGG	7	0	0	0	0	4	24	24	N
Fvb1:16863676-16864277	TE_homo_8503	Fvb1	16863676	16864277	602	120	73	0.767	.	GAGGUUAAGCAUGUCGAUGCGAGA	15	9	4	4	3	3	97	24	N
Fvb1:16864424-16865065	TE_struc_242	Fvb1	16864424	16865065	642	27	23	0.63	.	GUUUGGUUCGGAUCGGCUUAAGGC	2	2	1	0	2	3	19	24	N
Fvb1:16880173-16880344	TE_homo_8508	Fvb1	16880173	16880344	172	33	26	0.152	-	GAUGGAAGGGUAGAAAAUUGACUG	3	0	0	2	0	4	27	24	N
Fvb1:16888715-16888988	TE_homo_8522	Fvb1	16888715	16888988	274	8459	992	0.465	.	CAGUUUGCAGCCGAGAUUGAUCGU	622	242	107	278	175	444	7213	24	N
Fvb1:16924939-16925300	TE_homo_8539	Fvb1	16924939	16925300	362	407	258	0.563	.	AACUGGAAUUCAACGGACUCGCCG	12	33	5	47	29	51	242	24	N
Fvb1:16960922-16961117	TE_homo_8557	Fvb1	16960922	16961117	196	45	33	0.6	.	CCAAAAGGAGAUUCAGUUAGGAAC	3	1	2	3	0	4	35	24	N
Fvb1:17001827-17002244	TE_homo_8592	Fvb1	17001827	17002244	418	153	80	0.68	.	AUGAGAUGAGGAAGCUGUUGGAUC	39	6	2	3	3	17	122	24	N
Fvb1:17005672-17005921	TE_homo_8594	Fvb1	17005672	17005921	250	67	56	0.507	.	AGGAAAGAAUAACUACUGUCAGAG	3	5	0	4	2	8	48	24	N
Fvb1:17006370-17007084	TE_homo_8597	Fvb1	17006370	17007084	715	116	68	0.543	.	AAGAGAAUGUAUGAUGAACAAAGU	8	0	1	1	4	16	94	24	N
Fvb1:17007085-17007413	TE_homo_8599	Fvb1	17007085	17007413	329	247	67	0.259	.	AUGCCUGGACUUGAGAUUUUGAGA	75	4	1	10	4	23	205	24	N
Fvb1:17068571-17068664	TE_homo_8632	Fvb1	17068571	17068664	94	5	5	0.2	.	AAUAAGAGAAUCAAGUUGCGCAAU	1	0	1	0	0	0	4	24	N
Fvb1:17068665-17068930	TE_homo_8633	Fvb1	17068665	17068930	266	41	36	0.561	.	AACGGAUGGGUGACGCCUAGCGCC	4	3	1	5	1	3	28	24	N
Fvb1:17091740-17091841	TE_homo_8647	Fvb1	17091740	17091841	102	2	2	1	+	AUUUUUUAAGGUGAUUUUAUGACA	1	0	0	0	0	0	2	24	N
Fvb1:17116754-17117323	TE_homo_8654	Fvb1	17116754	17117323	570	97	44	0.299	.	UAUAAUGAGCAAAUCUGAAGGUCU	41	2	0	1	2	11	81	24	N
Fvb1:17117307-17117708	TE_homo_8655	Fvb1	17117307	17117708	402	188	93	0.516	.	AUUAGGACCUCCAGAUUUGCUGAG	18	5	4	7	1	21	150	24	N
Fvb1:17118759-17118838	TE_homo_8658	Fvb1	17118759	17118838	80	9	5	0.778	.	AAUAUUUGUCCCUAUUCUGACACU	5	0	1	0	0	0	8	24	N
Fvb1:17119211-17119368	TE_homo_8661	Fvb1	17119211	17119368	158	13	9	0.846	+	AGUUAUAGGACUGAAUUGAUUUUG	3	0	0	1	0	1	11	24	N
Fvb1:17119632-17119938	TE_homo_8664	Fvb1	17119632	17119938	307	13	12	0.462	.	UGUAGAGCGGACGUCUGCACU	2	1	0	2	1	1	8	24	N
Fvb1:17121064-17121421	TE_homo_8670	Fvb1	17121064	17121421	358	9	7	0.222	.	AAUUGGGGAUUUUUAUAUUUUGAU	3	0	0	0	0	0	9	24	N
Fvb1:17157929-17158425	TE_homo_8682	Fvb1	17157929	17158425	497	372	177	0.503	.	AGAAAAUGGACUAACAUGAUGGUC	20	13	3	6	9	42	299	24	N
Fvb1:17172144-17172292	TE_homo_8688	Fvb1	17172144	17172292	149	19	17	0.316	.	UCUCAUGUUCCGUCCAACUGGCCC	2	1	1	0	0	1	16	24	N
Fvb1:17179768-17179868	TE_homo_8695	Fvb1	17179768	17179868	101	8	4	1	+	AACGGAAUGCUAAAAUUGGAGAGA	3	0	0	0	0	0	8	24	N
Fvb1:17182639-17182741	TE_homo_8697	Fvb1	17182639	17182741	103	7	3	0	-	UUUCCUUGUAUGUGUAGAUGUAUG	5	0	0	0	0	1	6	24	N
Fvb1:17183582-17183803	TE_homo_8698	Fvb1	17183582	17183803	222	61	21	0.098	-	GAUUCCUUGACAACUCUGAAUUGU	21	2	1	2	0	1	55	24	N
Fvb1:17184338-17184675	TE_homo_8699	Fvb1	17184338	17184675	338	63	44	0.46	.	AUGAGGACCACUAAGUUGAGGACU	5	2	1	2	2	9	47	24	N
Fvb1:17184676-17184762	TE_homo_8700	Fvb1	17184676	17184762	87	3	2	1	+	UUAGAACUCCUCCCUAUAUAGAGA	2	0	0	0	0	1	2	24	N
Fvb1:17221427-17221864	TE_struc_247	Fvb1	17221427	17221864	438	3	3	1	+	AAUCUUACGUGCGACAGCUGCA	1	0	0	0	1	0	2	24	N
Fvb1:17221937-17222526	TE_struc_248	Fvb1	17221937	17222526	590	980	268	0.346	.	AGAGAAACUGCUAGAAAAGAUACA	355	27	13	27	11	96	806	24	N
Fvb1:17230747-17231254	TE_struc_10	Fvb1	17230747	17231254	508	70	52	0.357	.	AGUGUGGUAACUGAGAGUGACUGC	4	1	0	4	1	9	55	24	N
Fvb1:17274583-17274879	TE_homo_8726	Fvb1	17274583	17274879	297	46	27	0.761	.	AGACGUCCUCCUCUGAUCCGGACU	16	0	1	2	1	5	37	24	N
Fvb1:17275222-17275475	TE_homo_8730	Fvb1	17275222	17275475	254	152	70	0.599	.	GACGCUGCUGGAGUCUUCUGGGGU	18	12	3	22	19	11	85	24	N
Fvb1:17312742-17313128	TE_struc_250	Fvb1	17312742	17313128	387	101	47	0.327	.	AAUUCAAACGGAAUAUGAGAAUUU	15	13	0	2	1	8	77	24	N
Fvb1:17322776-17322995	TE_homo_8764	Fvb1	17322776	17322995	220	28	11	0.786	.	AUUGAGCAUGGAACAAGGAAGACU	13	1	0	1	0	0	26	24	N
Fvb1:17337525-17337797	TE_homo_8772	Fvb1	17337525	17337797	273	163	113	0.54	.	UCCAGUUUUCCGGCGAGAUCGACU	8	8	3	19	17	14	102	24	N
Fvb1:17338333-17338597	TE_homo_8777	Fvb1	17338333	17338597	265	62	34	0.355	.	AGAAGCGGACGUCCGCACUCGGCU	9	3	0	2	10	5	42	24	N
Fvb1:17367493-17367835	TE_homo_8798	Fvb1	17367493	17367835	343	490	221	0.314	.	AGAGACGGACUAUAUAUAUAUAUU	36	43	10	51	32	122	232	24	N
Fvb1:17369399-17369718	TE_homo_8801	Fvb1	17369399	17369718	320	8	6	0.75	.	UUUGUCCACCCUACGUUCUCUUCA	2	0	0	0	0	1	7	24	N
Fvb1:17369788-17370137	TE_homo_8802	Fvb1	17369788	17370137	350	53	41	0.415	.	UGAAUGACUAAUAUACCCUAACGU	7	1	0	1	2	8	41	24	N
Fvb1:17397504-17397657	TE_homo_8823	Fvb1	17397504	17397657	154	3	3	1	+	AGGAAAUUUAACAACAGAAACAGC	1	0	0	0	0	0	3	24	N
Fvb1:17403432-17403712	TE_homo_8832	Fvb1	17403432	17403712	281	20	17	0.55	.	AUCCUAAAAGUGUGGCUAUCGGGA	2	0	0	2	1	0	17	24	N
Fvb1:17403826-17404132	TE_homo_8834	Fvb1	17403826	17404132	307	31	23	0.871	+	CACUACUGGAGAUGCUCAAGGAGC	6	1	2	0	3	3	22	24	N
Fvb1:17404541-17404710	TE_homo_8836	Fvb1	17404541	17404710	170	4	4	0.75	.	CGAAAUAUAGUCUGUUUCGUCGGC	1	0	0	0	0	0	4	24	N
Fvb1:17404869-17405229	TE_homo_8838	Fvb1	17404869	17405229	361	123	60	0.52	.	ACCGAAGGUGGAUGGUAAGAAGUC	21	8	3	5	6	6	95	24	N
Fvb1:17409033-17409197	TE_homo_8844	Fvb1	17409033	17409197	165	66	44	0.591	.	AUGAGCUUUCUCUUGCCGGUGGAC	10	1	0	2	7	1	55	24	N
Fvb1:17410905-17411230	TE_homo_8847	Fvb1	17410905	17411230	326	236	127	0.508	.	UUGGCCGGUGUGGGAUAUUACAAU	23	11	8	11	13	17	176	24	N
Fvb1:17424546-17424695	TE_homo_8856	Fvb1	17424546	17424695	150	1	1	1	+	AACUGCAGAAACUUUCGGCUACCU	1	0	0	0	0	0	1	24	N
Fvb1:17424788-17425148	TE_homo_8858	Fvb1	17424788	17425148	361	91	32	0.527	.	ACCGAAGGUGGAUGGUAAGAAGUC	28	3	1	1	3	7	76	24	N
Fvb1:17428746-17428910	TE_homo_8865	Fvb1	17428746	17428910	165	153	66	0.745	.	ACCGGACACUAGAGACAUCUCAAA	24	9	1	4	5	17	117	24	N
Fvb1:17430626-17430951	TE_homo_8869	Fvb1	17430626	17430951	326	41	26	0.683	.	AGCGGACAAUAUCGUGUUACGGCA	4	0	0	2	0	5	34	24	N
Fvb1:17458197-17458557	TE_homo_8894	Fvb1	17458197	17458557	361	10	4	0.3	.	ACCGAAGGUGGAUGGUAAGAAGUC	6	0	0	0	0	1	9	24	N
Fvb1:17460644-17460916	TE_homo_8899	Fvb1	17460644	17460916	273	59	33	0.593	.	GACGCUGCUGGAGUCUUCUGGGGU	7	4	1	10	7	6	31	24	N
Fvb1:17478250-17478774	TE_homo_8917	Fvb1	17478250	17478774	525	124	58	0.258	.	AAACAGUCGGGACAAGACGGGCCU	36	4	2	8	2	10	98	24	N
Fvb1:17478772-17479142	TE_homo_8918	Fvb1	17478772	17479142	371	73	50	0.521	.	GUUGUAGACUCACUUAUUGCACCC	6	6	1	3	4	4	55	24	N
Fvb1:17499703-17499875	TE_homo_8927	Fvb1	17499703	17499875	173	43	21	0.372	.	AACCGCUGGCAGCUCAAAACGACU	9	0	0	1	1	1	40	24	N
Fvb1:17511739-17512186	TE_homo_8932	Fvb1	17511739	17512186	448	1142	161	0.86	+	ACUAAAUUGAACUUUUGAAAGCCU	721	12	16	51	27	104	932	24	N
Fvb1:17512851-17513229	TE_homo_8933	Fvb1	17512851	17513229	379	1495	458	0.634	.	AAGUUGAGGACUUAGUGAGAACUU	86	122	20	55	37	234	1027	24	N
Fvb1:17529114-17529229	TE_homo_8942	Fvb1	17529114	17529229	116	3	1	1	+	UACAUAUGUCAGUGAGGUUUGAAC	3	0	0	0	0	0	3	24	N
Fvb1:17614438-17614561	TE_homo_8998	Fvb1	17614438	17614561	124	48	26	0.75	.	AUGAGAUGAGGAAGCUGUUGGAUC	16	2	0	1	0	6	39	24	N
Fvb1:17615124-17615397	TE_homo_9000	Fvb1	17615124	17615397	274	7	7	0.571	.	AUUGUGAUAUCUUUCCGGAAGCUU	1	1	0	0	0	0	6	24	N
Fvb1:17615469-17615583	TE_homo_9002	Fvb1	17615469	17615583	115	34	18	0.147	-	AAUAUCGUCGGUUAAAGUUGCUGG	7	1	0	2	0	2	29	24	N
Fvb1:17615584-17615876	TE_homo_9004	Fvb1	17615584	17615876	293	37	26	0.297	.	UUUUUCCCAGACUAUAGCCGACGA	5	0	0	3	0	4	30	24	N
Fvb1:17636720-17636878	TE_homo_9015	Fvb1	17636720	17636878	159	75	34	0.44	.	AAUGUCGCGCGAUUUUAGCUGGGA	25	0	3	0	1	5	66	24	N
Fvb1:17709370-17709662	TE_homo_9071	Fvb1	17709370	17709662	293	149	86	0.389	.	AAACUGGAAUUCGGAGGACUGACC	15	7	0	18	4	10	110	24	N
Fvb1:17709593-17709849	TE_homo_9072	Fvb1	17709593	17709849	257	221	89	0.262	.	CGCCGGAAAACUGAAAAAGAACGG	22	6	0	7	8	8	192	24	N
Fvb1:17723384-17724043	TE_homo_9089	Fvb1	17723384	17724043	660	195	136	0.467	.	AAGAGUAGAACGACACAUAGAGAA	15	10	3	6	6	33	137	24	N
Fvb1:17799825-17799977	TE_homo_9123	Fvb1	17799825	17799977	153	62	41	0.5	.	AUGCGGACGUCCACUUCUGAACGG	6	8	0	6	1	4	43	24	N
Fvb1:17820752-17821674	TE_homo_9134	Fvb1	17820752	17821674	923	133	72	0.436	.	AGAGGUAUACUGAGUAAAUUUGGA	14	2	0	3	1	17	110	24	N
Fvb1:17832771-17833673	TE_homo_9137	Fvb1	17832771	17833673	903	531	216	0.326	.	AUAAUAGAAUGAGGUCAAGUAAGC	44	28	3	19	10	92	379	24	N
Fvb1:17839982-17840371	TE_homo_9138	Fvb1	17839982	17840371	390	1077	276	0.658	.	GAAACUGGAAUUCGGCGGACUCGC	127	86	23	161	186	158	463	24	N
Fvb1:17854663-17854754	TE_homo_9155	Fvb1	17854663	17854754	92	34	27	0.618	.	CGCCCCUGACGGAUAGUAUAGCCU	4	6	0	2	1	3	22	24	N
Fvb1:17864557-17864998	TE_homo_9179	Fvb1	17864557	17864998	442	49	26	0.878	+	AAGGGGGCUGUAUAUAUAUAUAUA	10	1	0	1	1	18	28	24	N
Fvb1:17873056-17873851	TE_struc_260	Fvb1	17873056	17873851	796	126	97	0.333	.	AUUUCAGCUUGGACAGGUGGCAGC	12	10	3	9	5	19	80	24	N
Fvb1:17914334-17915118	TE_struc_261	Fvb1	17914334	17915118	785	8	8	0.25	.	CCACCUCUAAUUCCCAUAUAUGA	1	0	1	0	2	1	4	24	N
Fvb1:17934836-17935539	TE_struc_263	Fvb1	17934836	17935539	704	117	73	0.65	.	ACUCGGUGUCGGUUCGGUGCGGUU	7	0	1	2	0	11	103	24	N
Fvb1:17941464-17942121	TE_struc_264	Fvb1	17941464	17942121	658	86	56	0.512	.	AGGAUAGUGGAACUGUCUCUGGGC	8	2	0	3	1	11	69	24	N
Fvb1:17985807-17986238	TE_homo_9223	Fvb1	17985807	17986238	432	115	34	0.896	+	AAAAUAGGGAUCCCUCAUUGGAAG	22	2	1	6	2	7	97	24	N
Fvb1:17986252-17986591	TE_homo_9226	Fvb1	17986252	17986591	340	148	74	0.466	.	AUUGCGGACGUCCGCACCUGAGAA	31	8	1	11	11	10	107	24	N
Fvb1:17986919-17987201	TE_homo_9231	Fvb1	17986919	17987201	283	343	163	0.609	.	ACCCCAGCGGACUCCAGUAGCGUC	42	15	11	28	26	57	206	24	N
Fvb1:17986963-17987303	TE_homo_9232	Fvb1	17986963	17987303	341	577	244	0.489	.	GAUCCGGACUGUAUAUAUAUAUA	43	40	24	49	41	113	310	24	N
Fvb1:17987013-17987347	TE_homo_9233	Fvb1	17987013	17987347	335	606	256	0.505	.	GAUCCGGACUGUAUAUAUAUAUA	43	42	24	52	43	114	331	24	N
Fvb1:17987267-17987546	TE_homo_9234	Fvb1	17987267	17987546	280	385	172	0.361	.	GAUCCGGACUGUAUAUAUAUAUA	43	22	24	22	14	81	222	24	N
Fvb1:18026214-18026300	TE_homo_9248	Fvb1	18026214	18026300	87	52	27	0.154	-	CAUCGGAAUGGAAAGUCAUCGAGA	11	2	0	0	2	9	39	24	N
Fvb1:18026302-18026724	TE_homo_9249	Fvb1	18026302	18026724	423	113	70	0.584	.	CUGUUGGACCUAAAAAUAGCUCAA	8	6	1	4	2	13	87	24	N
Fvb1:18026725-18026957	TE_homo_9250	Fvb1	18026725	18026957	233	131	75	0.473	.	AAAUACUUUUCUGAAUGUUGGGAA	8	4	2	4	3	16	102	24	N
Fvb1:18027052-18027386	TE_homo_9251	Fvb1	18027052	18027386	335	300	118	0.28	.	UCCAUAGUCGAAAACUCUAGGCCU	45	10	2	8	13	52	215	24	N
Fvb1:18028484-18028901	TE_homo_9252	Fvb1	18028484	18028901	418	193	97	0.399	.	AUGAGGACCACUAAGUUGAAGACU	23	8	4	1	5	19	156	24	N
Fvb1:18033215-18033671	TE_homo_9254	Fvb1	18033215	18033671	457	41	32	0.537	.	ACCCCUGAGUUUGGACGAAAUACC	6	0	4	1	0	2	34	24	N
Fvb1:18034660-18034755	TE_homo_9256	Fvb1	18034660	18034755	96	81	29	0.074	-	AUGACUGAGAUUAGAACAAAACGU	40	7	4	2	3	11	54	24	N
Fvb1:18050389-18050763	TE_struc_266	Fvb1	18050389	18050763	375	237	99	0.903	+	UUGUCGCCGGCCAGUUCUGGA	27	8	1	55	34	13	126	24	N
Fvb1:18082756-18082871	TE_homo_9270	Fvb1	18082756	18082871	116	9	8	0.556	.	AUUAGAAUGGUUGUAGGUUCGACC	2	1	0	1	0	0	7	24	N
Fvb1:18143773-18144049	TE_homo_9338	Fvb1	18143773	18144049	277	2	2	0.5	.	AAAAGUCGUCGGCUAUAGUCCAGA	1	0	0	0	0	0	2	24	N
Fvb1:18146125-18146278	TE_homo_9344	Fvb1	18146125	18146278	154	37	19	0.378	.	UCUAAUGAGGACCAAGUGAGGACU	8	1	1	0	1	3	31	24	N
Fvb1:18172810-18172936	TE_homo_9382	Fvb1	18172810	18172936	127	36	29	0.528	.	UAACAACUUAUUAUCCAUUGCUGU	4	1	2	2	1	2	28	24	N
Fvb1:18172951-18173274	TE_homo_9383	Fvb1	18172951	18173274	324	68	44	0.485	.	ACACGUUGUUGAGUUAUUGAAAGA	12	2	2	1	1	9	53	24	N
Fvb1:18182622-18183186	TE_struc_268	Fvb1	18182622	18183186	565	78	58	0.462	.	AUCGGUGUUCUUUACAGUGGCGGA	4	4	0	2	1	10	61	24	N
Fvb1:18191223-18191499	TE_homo_9400	Fvb1	18191223	18191499	277	51	32	0.039	-	AGAGAACAGAGACUGAAAUGAAGU	7	1	0	6	1	6	37	24	N
Fvb1:18200908-18201406	TE_struc_269	Fvb1	18200908	18201406	499	260	159	0.369	.	AAGGUUAGGGAUUGUGAUGGGAAC	10	8	3	9	6	41	193	24	N
Fvb1:18218178-18218266	TE_homo_9430	Fvb1	18218178	18218266	89	30	14	0.733	.	AGGAAACUUGUAGAUACGAUGUAU	15	0	1	0	0	1	28	24	N
Fvb1:18218259-18218842	TE_homo_9431	Fvb1	18218259	18218842	584	102	60	0.294	.	AUUGAACCCUCUGACAUUUCAGGC	15	3	5	3	0	7	84	24	N
Fvb1:18224051-18224133	TE_homo_9439	Fvb1	18224051	18224133	83	12	10	0.417	.	AGUUUCCUGACUGGUCUAUGGGCA	3	0	0	0	0	0	12	24	N
Fvb1:18225702-18225847	TE_homo_9441	Fvb1	18225702	18225847	146	7	6	0.571	.	GUUCAGUUGGUCUUUUCACUUACC	2	0	0	0	0	1	6	24	N
Fvb1:18225904-18226097	TE_homo_9442	Fvb1	18225904	18226097	194	21	19	0.238	.	AAGUAAGCGACUAGACAUGAAAAU	2	0	0	2	0	3	16	24	N
Fvb1:18244016-18244454	TE_homo_9470	Fvb1	18244016	18244454	439	599	164	0.658	.	CACGUCAGACUGCCACGUGGUCCU	53	18	15	6	16	107	437	24	N
Fvb1:18259615-18259872	TE_homo_9480	Fvb1	18259615	18259872	258	445	243	0.544	.	AAAAUCGAUCUCGCCGGAAACUGG	19	29	7	67	47	39	256	24	N
Fvb1:18288254-18288424	TE_homo_9494	Fvb1	18288254	18288424	171	511	161	0.738	.	AAUUACAAUUUAAGGAGUCUGAAU	86	10	10	8	13	62	408	24	N
Fvb1:18295353-18295831	TE_struc_270	Fvb1	18295353	18295831	479	382	151	0.39	.	AGAAGGACUAACAUGAUGAUCGAC	45	7	3	10	5	41	316	24	N
Fvb1:18327745-18328043	TE_homo_9508	Fvb1	18327745	18328043	299	365	140	0.468	.	UAGGACAAGGGUUAAAGAGAACCU	43	10	5	12	6	35	297	24	N
Fvb1:18330048-18330266	TE_homo_9509	Fvb1	18330048	18330266	219	106	66	0.726	.	GACCCUUGUUGGAGAUUGCAUCUC	5	3	2	0	3	15	83	24	N
Fvb1:18337151-18337335	TE_homo_9510	Fvb1	18337151	18337335	185	387	146	0.517	.	AGGGAUAAACGUGAUCUGUGGAUC	44	7	5	20	10	42	303	24	N
Fvb1:18337584-18337697	TE_homo_9511	Fvb1	18337584	18337697	114	89	45	0.629	.	AUCGGUACAAUGUGAUCCACGGGC	25	3	0	1	2	8	75	24	N
Fvb1:18337804-18337966	TE_homo_9512	Fvb1	18337804	18337966	163	429	99	0.657	.	CCGAUACUGUCCAAACUUAACCAU	118	7	8	7	7	48	352	24	N
Fvb1:18340350-18340479	TE_homo_9515	Fvb1	18340350	18340479	130	14	12	0.571	.	AAACACUAUAUUCGUCGGCUAUAG	2	0	0	0	0	1	13	24	N
Fvb1:18356345-18356612	TE_homo_9535	Fvb1	18356345	18356612	268	757	291	0.37	.	AGUUUCGGGACUAACAUGAAUUCA	34	24	9	38	14	119	553	24	N
Fvb1:18365959-18366405	TE_homo_9546	Fvb1	18365959	18366405	447	44	19	0.795	.	AUAUGAUUUGGUGAUCGUUAAGGC	14	2	0	6	0	1	35	24	N
Fvb1:18380847-18381105	TE_homo_9564	Fvb1	18380847	18381105	259	22	19	0.727	.	AUAUAACAUCUGGUGUAGGGGCCU	3	1	2	4	1	2	12	24	N
Fvb1:18381854-18382168	TE_homo_9568	Fvb1	18381854	18382168	315	13	8	0.154	-	UUAUAGAUUACCGCUUGUCAGGGC	6	0	0	0	0	0	13	24	N
Fvb1:18382422-18382562	TE_homo_9570	Fvb1	18382422	18382562	141	47	31	0.319	.	ACGUCAUUGACAUAUGUAAGAGUA	7	2	0	1	0	7	37	24	N
Fvb1:18385699-18385925	TE_homo_9571	Fvb1	18385699	18385925	227	677	242	0.536	.	UUUCUGAUGUAGGAUCUUUCCUCU	50	20	13	27	40	108	469	24	N
Fvb1:18391561-18391917	TE_homo_9575	Fvb1	18391561	18391917	357	105	73	0.448	.	AGGAAUACUAGGAAUACUGAUGGA	9	0	1	3	4	16	81	24	N
Fvb1:18393144-18393324	TE_homo_9578	Fvb1	18393144	18393324	181	29	20	0.655	.	UUACCGUCCAGCAUUUUUUAGAAC	9	1	1	2	1	2	22	24	N
Fvb1:18408388-18408511	TE_homo_9603	Fvb1	18408388	18408511	124	1	1	1	+	ACAGUUUAAUUGAUUACAGGCGAG	1	0	0	0	0	0	1	24	N
Fvb1:18408624-18408715	TE_homo_9604	Fvb1	18408624	18408715	92	13	10	0.462	.	AGACCUUACAGACUCAAUAUAUUC	2	1	1	0	0	1	10	24	N
Fvb1:18418131-18418273	TE_homo_9611	Fvb1	18418131	18418273	143	186	97	0.495	.	AGUCGUGACUUGGUUGAUAAUGGA	26	8	1	7	4	26	140	24	N
Fvb1:18431187-18431283	TE_homo_9615	Fvb1	18431187	18431283	97	74	49	0.5	.	AAGAACUGAACAUAUGUCAAACUU	8	3	4	1	4	13	49	24	N
Fvb1:18432277-18432542	TE_homo_9618	Fvb1	18432277	18432542	266	172	84	0.645	.	AAUCAUAAGGACUGAACAGAUGUC	26	1	2	6	1	21	141	24	N
Fvb1:18438667-18438968	TE_homo_9622	Fvb1	18438667	18438968	302	27	16	0.778	.	AGGACUCAUAUUACCACUUUAAAG	7	0	2	0	0	1	24	24	N
Fvb1:18452299-18452891	TE_homo_9639	Fvb1	18452299	18452891	593	344	102	0.584	.	GAGAGGUAUACUGAAUAAAUUUGG	47	15	2	17	8	26	276	24	N
Fvb1:18458740-18458927	TE_homo_9640	Fvb1	18458740	18458927	188	47	39	0.255	.	AGGCACUAGUCGGGCGGGACAGCC	5	1	0	2	2	6	36	24	N
Fvb1:18466550-18466915	TE_homo_9644	Fvb1	18466550	18466915	366	51	27	0.157	-	GAUAAAUCACACUUACGAAUGCCU	12	0	0	1	1	1	48	24	N
Fvb1:18475369-18475638	TE_homo_9664	Fvb1	18475369	18475638	270	225	108	0.658	.	CGCCGGAGGGUGGAGAACGGACGG	29	23	2	23	16	22	139	24	N
Fvb1:18517707-18517896	TE_homo_9695	Fvb1	18517707	18517896	190	282	143	0.454	.	AAACGUGGCCUGUGGAUUAUU	31	28	2	37	10	45	160	24	N
Fvb1:18535775-18536189	TE_homo_9709	Fvb1	18535775	18536189	415	121	71	0.248	.	AGAUGCUCUAAGGCAAUAUUAGUA	14	7	0	2	1	10	101	24	N
Fvb1:18552257-18552396	TE_homo_9728	Fvb1	18552257	18552396	140	27	12	0.148	-	AUACCUGAGUCGAACUUUCAAAAU	13	0	1	0	0	4	22	24	N
Fvb1:18555554-18555649	TE_homo_9730	Fvb1	18555554	18555649	96	11	6	0	-	AUAUUAUUGUAGUGAUUGGAACCU	5	0	0	1	0	1	9	24	N
Fvb1:18555651-18556049	TE_homo_9731	Fvb1	18555651	18556049	399	12	8	0.5	.	AGCGAGUGAGGACAGUGACAAAAC	3	0	0	0	1	1	10	24	N
Fvb1:18556052-18556147	TE_homo_9732	Fvb1	18556052	18556147	96	12	9	0.5	.	AGCGAGUGAGGACAGUGACAAAAC	3	0	0	1	1	3	7	24	N
Fvb1:18590247-18590601	TE_homo_9751	Fvb1	18590247	18590601	355	89	48	0.831	+	UUUAGCCGACGACACAUGUAGAAG	10	2	1	6	2	11	67	24	N
Fvb1:18613890-18614002	TE_homo_9771	Fvb1	18613890	18614002	113	69	21	0.696	.	AAACUGCAGAAACUUUCGGCCACC	22	3	0	0	1	5	60	24	N
Fvb1:18614074-18614431	TE_homo_9773	Fvb1	18614074	18614431	358	10	7	0.8	+	CGAGAAGAAAAUCUGGCAGAUAAU	3	0	0	0	0	0	10	24	N
Fvb1:18627033-18627362	TE_homo_9782	Fvb1	18627033	18627362	330	20	19	0.65	.	AAUACUCAUAUAAGAAAGGAAGCU	2	1	0	2	0	3	14	24	N
Fvb1:18627548-18627932	TE_homo_9783	Fvb1	18627548	18627932	385	43	32	0.395	.	AUACCGAUUCUUGUAGAUACC	5	2	4	9	2	4	22	24	N
Fvb1:18628134-18628403	TE_homo_9785	Fvb1	18628134	18628403	270	12	8	0.75	.	CGAGGGUUGAGUAAUUUGAAAAUA	3	0	0	1	0	2	9	24	N
Fvb1:18628605-18628874	TE_homo_9787	Fvb1	18628605	18628874	270	21	19	0.429	.	GGUUCGUAAAGAAUCGAUUUCUGA	2	1	0	0	1	4	15	24	N
Fvb1:18640829-18641095	TE_homo_9797	Fvb1	18640829	18641095	267	110	64	0.645	.	AUGGGGAUCCCCAAUAUUCGGAUU	8	6	2	2	3	16	81	24	N
Fvb1:18641096-18641462	TE_homo_9798	Fvb1	18641096	18641462	367	165	86	0.848	+	GUUAUCUAAUUACGGAUACGGGGA	14	2	0	5	5	46	107	24	N
Fvb1:18655001-18655378	TE_homo_9808	Fvb1	18655001	18655378	378	89	56	0.607	.	AGGAAAGUAAGCAUCAUGAAAGGA	7	2	0	1	2	10	74	24	N
Fvb1:18656315-18656458	TE_homo_9812	Fvb1	18656315	18656458	144	56	28	0.321	.	AAAAGACCAAUAUACUCUGAUGU	8	0	2	1	0	13	40	24	N
Fvb1:18658960-18659169	TE_homo_9816	Fvb1	18658960	18659169	210	362	165	0.671	.	AUAUGACGUCACCAAAACUGUUGG	28	17	8	32	29	50	226	24	N
Fvb1:18659167-18659347	TE_homo_9817	Fvb1	18659167	18659347	181	615	228	0.392	.	CACUAAAGCUGUUGGAACUGAGAA	42	25	10	42	19	79	440	24	N
Fvb1:18663949-18664136	TE_homo_9819	Fvb1	18663949	18664136	188	453	198	0.397	.	AUGGCCUCGGUACAAUUGAAUAUG	41	18	5	31	9	68	322	24	N
Fvb1:18678939-18679232	TE_homo_9839	Fvb1	18678939	18679232	294	74	61	0.689	.	AACUGGAAUUCGGCGGACU	3	7	4	5	2	10	46	24	N
Fvb1:18697637-18697952	TE_homo_9868	Fvb1	18697637	18697952	316	82	50	0.512	.	UUCCUACAUCGUCUAUAUUCGAGU	18	4	3	0	2	13	60	24	N
Fvb1:18706024-18706440	TE_homo_9875	Fvb1	18706024	18706440	417	174	59	0.224	.	AUGGGGACUGAAAUGAUGUUAACC	71	2	0	2	7	19	144	24	N
Fvb1:18714355-18714501	TE_homo_9878	Fvb1	18714355	18714501	147	460	113	0.741	.	ACGUGAUACCCAAACUCUCAACU	95	7	11	9	9	123	301	24	N
Fvb1:18720346-18720708	TE_homo_9883	Fvb1	18720346	18720708	363	41	32	0.634	.	AAACAUGAUCGUUCAUAGAGAACA	3	2	0	2	2	2	33	24	N
Fvb1:18724401-18724772	TE_homo_9886	Fvb1	18724401	18724772	372	61	48	0.475	.	CCUGCCUCUCCCACCA	5	9	0	8	2	7	35	24	N
Fvb1:18775934-18776158	TE_homo_9916	Fvb1	18775934	18776158	225	207	98	0.531	.	ACGAACCAAAUCUGUCAAAUAUGA	28	3	6	2	3	64	129	24	N
Fvb1:18788173-18788518	TE_struc_275	Fvb1	18788173	18788518	346	604	206	0.5	.	ACGUGAUACCCGAACUCUAAAAAG	37	19	12	17	21	81	454	24	N
Fvb1:18852235-18852529	TE_homo_9941	Fvb1	18852235	18852529	295	40	35	0.25	.	AAGUAAAUCGGUUAAUCUUGGCUA	2	1	0	4	1	6	28	24	N
Fvb1:18864715-18864900	TE_homo_9947	Fvb1	18864715	18864900	186	433	117	0.249	.	AGGCCUGAGUCGAACUCUCUAAGU	172	10	6	24	6	35	352	24	N
Fvb1:18867611-18867800	TE_homo_9950	Fvb1	18867611	18867800	190	117	44	0.692	.	AUCAGUCGGGUCCAAUUUUUAAAU	58	3	1	2	0	5	106	24	N
Fvb1:18867841-18868009	TE_homo_9951	Fvb1	18867841	18868009	169	294	74	0.507	.	AGGACUGAAUUGAUUUUGGCACCA	56	3	4	2	7	41	237	24	N
Fvb1:18891480-18891649	TE_homo_9971	Fvb1	18891480	18891649	170	120	58	0.317	.	AUCACUAAGGACAAAAUUGAAGUU	18	2	4	2	3	23	86	24	N
Fvb1:18967618-18968007	TE_homo_10012	Fvb1	18967618	18968007	390	88	64	0.455	.	ACCGAUUAUAUCCUUACUAUUAAA	11	3	1	3	2	16	63	24	N
Fvb1:19016865-19017356	TE_homo_10054	Fvb1	19016865	19017356	492	62	39	0.677	.	AUAGGUCGAAUCAGUGACAGAACC	6	3	1	2	4	4	48	24	N
Fvb1:19074023-19074388	TE_struc_277	Fvb1	19074023	19074388	366	81	51	0.654	.	AGGGGCGUAGCUACAUUGGAACCA	6	3	1	3	4	14	56	24	N
Fvb1:19122506-19122699	TE_homo_10145	Fvb1	19122506	19122699	194	56	43	0.661	.	ACCAUUCUAUAACGAUCCAGUAAG	3	1	3	2	2	7	41	24	N
Fvb1:19123298-19123974	TE_struc_278	Fvb1	19123298	19123974	677	481	232	0.451	.	AUUGUGAUUGAUUUCUCGUGCACC	22	22	8	10	11	70	360	24	N
Fvb1:19130268-19130503	TE_homo_10155	Fvb1	19130268	19130503	236	159	50	0.327	.	AGGGACUAAGAUGAAUUCACAUCU	39	3	1	4	1	18	132	24	N
Fvb1:19160718-19161011	TE_homo_10184	Fvb1	19160718	19161011	294	2212	252	0.781	.	AGAGAAUCUGUUGGAGCAAAACAC	1170	49	41	27	17	210	1868	24	N
Fvb1:19161990-19162600	TE_homo_10185	Fvb1	19161990	19162600	611	464	194	0.716	.	ACAAUUUGGUUUGGCCUGGGCUAG	145	25	4	22	7	55	351	24	N
Fvb1:19196825-19196913	TE_homo_10209	Fvb1	19196825	19196913	89	425	85	0.732	.	UGUUGAGAUUAUAGAUUCAAGCCU	117	1	3	18	2	27	374	24	N
Fvb1:19198118-19198363	TE_homo_10212	Fvb1	19198118	19198363	246	1	1	1	+	AUUUGAGUUAUCUCGCUAGCUAAG	1	0	0	0	0	0	1	24	N
Fvb1:19211536-19211860	TE_homo_10227	Fvb1	19211536	19211860	325	196	131	0.398	.	AGAAGCGGACGUCCACAAAAAAGU	12	9	5	3	2	29	148	24	N
Fvb1:19308099-19308639	TE_homo_10286	Fvb1	19308099	19308639	541	70	44	0.257	.	AAUGGUUGGAGAUGGAAUAUGAGU	13	2	2	0	1	6	59	24	N
Fvb1:19343759-19344145	TE_homo_10311	Fvb1	19343759	19344145	387	25	14	0.84	+	AGUUUACCCUCAUGAGGUUUGGGA	7	1	0	0	0	4	20	24	N
Fvb1:19344163-19344392	TE_homo_10312	Fvb1	19344163	19344392	230	68	39	0.853	+	UCGACCCGAACCGAACUGAAAGCC	9	4	0	2	2	4	56	24	N
Fvb1:19349930-19350377	TE_homo_10322	Fvb1	19349930	19350377	448	67	35	0.836	+	CCUAUUUUAAGCCAUUUAUAGGGA	11	3	1	12	1	13	37	24	N
Fvb1:19380307-19380423	TE_homo_10333	Fvb1	19380307	19380423	117	291	92	0.588	.	AUGUCGUGAGAUUUGAACUGAUGA	57	4	8	6	2	38	233	24	N
Fvb1:19463543-19464015	TE_homo_10358	Fvb1	19463543	19464015	473	34	11	0.912	+	UCCGGCCGGUUCUCAGGGUGAGGC	12	0	0	0	0	5	29	24	N
Fvb1:19467797-19467958	TE_homo_10363	Fvb1	19467797	19467958	162	2	2	1	+	CUGAAAACUAGACUCGUAGAGCUU	1	0	0	0	0	0	2	24	N
Fvb1:19477753-19478073	TE_homo_10375	Fvb1	19477753	19478073	321	60	44	0.35	.	AAAAUUGGUCCUCGAAGUUGUAAU	5	3	2	2	2	12	39	24	N
Fvb1:19483663-19483822	TE_homo_10376	Fvb1	19483663	19483822	160	386	131	0.254	.	AUUAAAACUGAACACUUUGAAGGU	42	6	9	11	7	32	321	24	N
Fvb1:19489088-19489191	TE_homo_10390	Fvb1	19489088	19489191	104	7	5	0.714	.	CAAAACCCAGAAACUUUAGCCGAC	2	0	0	0	0	1	6	24	N
Fvb1:19495203-19495379	TE_homo_10405	Fvb1	19495203	19495379	177	54	36	0.5	.	AAACUACAUGGACUGAACAUAUGU	8	2	2	2	1	9	38	24	N
Fvb1:19507854-19508190	TE_homo_10417	Fvb1	19507854	19508190	337	36	21	0.389	.	AGUGUCUUCUUCAAACUUCAUAGA	5	1	2	0	0	5	28	24	N
Fvb1:19508304-19508583	TE_homo_10418	Fvb1	19508304	19508583	280	32	23	0.406	.	AACUCAACAACUCAUUGGUAUCCG	3	0	0	0	0	6	26	24	N
Fvb1:19512126-19512213	TE_homo_10424	Fvb1	19512126	19512213	88	60	26	0.95	+	AAUUGAUGAAGUACAAUGAAACCU	17	4	1	0	0	7	48	24	N
Fvb1:19528496-19529039	TE_homo_10437	Fvb1	19528496	19529039	544	164	104	0.421	.	GAGAACAAAUCGUCGGCUAAGUGC	15	6	3	5	6	30	114	24	N
Fvb1:19587235-19587583	TE_homo_10474	Fvb1	19587235	19587583	349	6	6	0.333	.	AUUAUUCACCCCAAUAAUAUAGGG	1	0	0	0	0	0	6	24	N
Fvb1:19680164-19680286	TE_homo_10548	Fvb1	19680164	19680286	123	269	111	0.81	+	AUAGGGACUUUACAGAAUUUUACC	22	6	8	6	13	27	209	24	N
Fvb1:19680189-19680301	TE_homo_10549	Fvb1	19680189	19680301	113	258	102	0.837	+	AUAGGGACUUUACAGAAUUUUACC	22	6	8	6	13	26	199	24	N
Fvb1:19680955-19681401	TE_homo_10551	Fvb1	19680955	19681401	447	33	12	0.697	.	AUAGGGAUCCCUCAAUGGAAGGGG	9	0	0	1	3	3	26	24	N
Fvb1:19694345-19694513	TE_homo_10567	Fvb1	19694345	19694513	169	1	1	1	+	CCAGACAGUGAGCUUUAUAUCAUU	1	0	0	0	0	0	1	24	N
Fvb1:19763948-19764462	TE_homo_10639	Fvb1	19763948	19764462	515	650	320	0.572	.	AUUUAAAUCUCAAAACGUUAGGCC	25	16	9	17	19	97	492	24	N
Fvb1:19774390-19774608	TE_homo_10660	Fvb1	19774390	19774608	219	28	24	0.607	.	AUCACAUGACCGAAGAAUUGGAUG	3	0	2	1	1	8	16	24	N
Fvb1:19779347-19779637	TE_homo_10667	Fvb1	19779347	19779637	291	19	9	0.211	.	GAUGAAAUUGAAAGUUUAGGGACU	10	0	1	0	1	0	17	24	N
Fvb1:19806567-19807053	TE_struc_282	Fvb1	19806567	19807053	487	67	27	0.701	.	AUCCAAUUUCUCUGUCAAGUGAUG	27	2	0	0	3	5	57	24	N
Fvb1:19820925-19821346	TE_homo_10709	Fvb1	19820925	19821346	422	1403	329	0.639	.	AAAGAGUGUAAGUUUUUUGGGCCU	348	33	14	69	61	109	1117	24	N
Fvb1:19880377-19880492	TE_homo_10773	Fvb1	19880377	19880492	116	46	19	0.891	+	GAGAAUAUUUUGACGUGUGAGACA	11	1	1	2	0	7	35	24	N
Fvb1:19940806-19940896	TE_homo_10811	Fvb1	19940806	19940896	91	8	6	0.75	.	ACAACAGGAGAUUGAUGAAAGACU	3	1	0	0	0	2	5	24	N
Fvb1:19946157-19946300	TE_homo_10819	Fvb1	19946157	19946300	144	5	4	0.6	.	AAUGAACUAUUAACUCAAAGGUGA	2	0	0	0	0	1	4	24	N
Fvb1:19953521-19953884	TE_homo_10828	Fvb1	19953521	19953884	364	63	39	0.683	.	CCAGCAGACUAGUUAAACUUGAGC	8	0	0	1	3	11	48	24	N
Fvb1:19954535-19954814	TE_homo_10829	Fvb1	19954535	19954814	280	88	63	0.625	.	AGCCGACUAAGGUCAGAUCGAGGC	6	5	0	6	1	16	60	24	N
Fvb1:19956243-19956731	TE_homo_10832	Fvb1	19956243	19956731	489	609	186	0.644	.	AAGAAGGACUAACAUGAUGAUCA	81	12	7	20	48	147	375	24	N
Fvb1:20045825-20046167	TE_homo_10929	Fvb1	20045825	20046167	343	105	72	0.714	.	AACAACGUGUGGGGUGAGUAAACU	10	2	1	1	3	17	81	24	N
Fvb1:20068954-20069373	TE_homo_10957	Fvb1	20068954	20069373	420	3221	566	0.673	.	AGGACUUGGUGAGGACUUUUCGGU	484	292	83	82	56	495	2213	24	N
Fvb1:20072540-20072926	TE_struc_284	Fvb1	20072540	20072926	387	15	11	0.333	.	AAAGUGUAGGGACUAACAUGAAGU	4	0	0	0	2	1	12	24	N
Fvb1:20081511-20081889	TE_homo_10965	Fvb1	20081511	20081889	379	76	48	0.171	-	GAGAAUGGGGACUGAAAUGAAAUU	7	3	4	2	3	15	49	24	N
Fvb1:20100217-20100352	TE_homo_11000	Fvb1	20100217	20100352	136	101	60	0.515	.	AGUGCGGAUUACAAUUUGGGAAGU	22	5	1	5	4	11	75	24	N
Fvb1:20102316-20102577	TE_homo_11002	Fvb1	20102316	20102577	262	118	68	0.661	.	GAUGAAAUUGAAAAUUUAGGGACU	28	6	2	1	3	14	92	24	N
Fvb1:20145137-20145430	TE_struc_286	Fvb1	20145137	20145430	294	131	69	0.542	.	GAUGAAAUUGAAAGUUUAGGGACU	24	3	3	1	4	14	106	24	N
Fvb1:20146714-20146985	TE_homo_11033	Fvb1	20146714	20146985	272	78	49	0.372	.	CGCCGAAGGGUGGAGAACCGACGG	7	5	3	5	5	2	58	24	N
Fvb1:20166061-20166167	TE_homo_11051	Fvb1	20166061	20166167	107	22	21	0.591	.	ACGGUUGGUAAUAGGCAAUGAUAG	2	1	1	0	0	3	17	24	N
Fvb1:20175104-20175295	TE_homo_11070	Fvb1	20175104	20175295	192	84	28	0.179	-	AUAAUCCCGGAGACUAUGUAGAAU	26	0	0	1	0	6	77	24	N
Fvb1:20236516-20236805	TE_homo_11122	Fvb1	20236516	20236805	290	19	11	0.211	.	CGACACACGUAUAAGUCGUCGGCU	3	1	0	0	1	3	14	24	N
Fvb1:20243585-20243773	TE_homo_11131	Fvb1	20243585	20243773	189	197	120	0.548	.	AAAAGAAUGGACUCGCCGGGGAGG	8	20	5	26	23	30	93	24	N
Fvb1:20259821-20260439	TE_homo_11144	Fvb1	20259821	20260439	619	525	189	0.434	.	CACGAUAUUGUCCGCUUUGGGCCC	52	11	14	16	10	45	429	24	N
Fvb1:20344649-20344806	TE_homo_11224	Fvb1	20344649	20344806	158	243	60	0.782	.	AGUAAUUAUUUCAUGUAUCCGGCC	89	8	1	13	4	18	199	24	N
Fvb1:20377655-20377878	TE_homo_11254	Fvb1	20377655	20377878	224	8	7	0.5	.	ACAUGCAUCCAGAAACGGAGGAUA	2	0	0	0	0	0	8	24	N
Fvb1:20386010-20386233	TE_homo_11259	Fvb1	20386010	20386233	224	5	5	0.2	.	AGACUCUUUGACUUUUUUUGCUUA	1	0	1	0	0	0	4	24	N
Fvb1:20408006-20408322	TE_homo_11287	Fvb1	20408006	20408322	317	419	164	0.527	.	ACAAGGACUGAACAAUUGUUGACU	32	7	9	11	5	41	346	24	N
Fvb1:20413684-20414098	TE_homo_11296	Fvb1	20413684	20414098	415	94	54	0.596	.	UCACACGGAAUGUAGGAAGACACC	14	3	4	2	2	8	75	24	N
Fvb1:20456454-20456656	TE_homo_11335	Fvb1	20456454	20456656	203	4126	151	0.04	-	ACCCGAGCGGACACUAGAGGCAUC	3536	21	17	38	105	146	3799	24	N
Fvb1:20456620-20456887	TE_homo_11336	Fvb1	20456620	20456887	268	568	232	0.452	.	CGUCGUCGGCGCCUGAGGGUGGAG	94	44	26	51	21	59	367	24	N
Fvb1:20485193-20485373	TE_homo_11364	Fvb1	20485193	20485373	181	24	17	0.792	.	UUUAAUCACAAAAGGCCUCGGUAC	5	0	1	2	0	3	18	24	N
Fvb1:20485616-20485795	TE_homo_11365	Fvb1	20485616	20485795	180	19	13	0.263	.	ACCUUAAAGGUGGUUAAGUUGGGA	6	0	0	2	0	2	15	24	N
Fvb1:20486039-20486193	TE_homo_11367	Fvb1	20486039	20486193	155	35	20	0.743	.	AAUAUCCCACAUCGGCCAAACGGA	5	1	1	1	0	3	29	24	N
Fvb1:20577034-20577360	TE_homo_11454	Fvb1	20577034	20577360	327	12	7	0.583	.	AUGGGGACUGAAAUGAUGUUAACC	5	0	0	0	1	0	11	24	N
Fvb1:20578131-20578545	TE_homo_11456	Fvb1	20578131	20578545	415	134	80	0.664	.	CACCAAAAGGCCUCGUGUUAGAUU	10	4	2	8	4	11	105	24	N
Fvb1:20629837-20630392	TE_homo_11496	Fvb1	20629837	20630392	556	113	81	0.611	.	CGGGUUUUGGCCGUUCGGAAGCCU	5	8	0	5	1	7	92	24	N
Fvb1:20632771-20633097	TE_homo_11499	Fvb1	20632771	20633097	327	2	2	0	-	ACAUAUAUAUAUAUAUACAGGGCC	1	0	0	0	0	0	2	24	N
Fvb1:20641962-20642080	TE_homo_11511	Fvb1	20641962	20642080	119	26	14	0.538	.	ACAUAUAUCUAGUGAGGUUUGAAC	5	0	0	1	0	1	24	24	N
Fvb1:20651863-20651979	TE_homo_11515	Fvb1	20651863	20651979	117	4	4	0	-	UGUAGUAAGAUACUAUUCCAGCA	1	0	0	0	0	1	3	24	N
Fvb1:20655692-20655807	TE_homo_11519	Fvb1	20655692	20655807	116	12	9	0.25	.	UCCUAGAUUGUAGUAAGAUUUCUU	3	0	0	2	0	3	7	24	N
Fvb1:20702574-20702666	TE_homo_11559	Fvb1	20702574	20702666	93	13	11	0.692	.	AUGGUUUGUUUUGGGGUUGUGAAA	2	0	1	0	0	2	10	24	N
Fvb1:20718782-20719206	TE_homo_11576	Fvb1	20718782	20719206	425	623	63	0.953	+	ACUAAAUUGAACUUUUGAAAGCCU	361	7	3	23	4	75	511	24	N
Fvb1:20724969-20725073	TE_homo_11580	Fvb1	20724969	20725073	105	132	50	0.22	.	AUAAACAAGUGAAUGAGAAUGACU	63	7	0	5	2	6	112	24	N
Fvb1:20759706-20759988	TE_homo_11603	Fvb1	20759706	20759988	283	42	28	0.571	.	AAGGACUAGACAGAUGUUGACUUC	6	0	0	4	0	8	30	24	N
Fvb1:20763213-20763612	TE_homo_11605	Fvb1	20763213	20763612	400	98	45	0.827	+	AGAGAAAGUCCGGACACACACGUA	22	4	1	3	3	16	71	24	N
Fvb1:20781937-20782045	TE_homo_11613	Fvb1	20781937	20782045	109	4	3	0.25	.	UAUUACAGAUUCCUUAUGAACCCC	2	0	0	0	0	1	3	24	N
Fvb1:20784393-20784483	TE_homo_11618	Fvb1	20784393	20784483	91	21	18	0.524	.	AUUAGGGCGUGACAGAAUCGAUUC	2	0	0	0	0	1	20	24	N
Fvb1:20817414-20817702	TE_homo_11632	Fvb1	20817414	20817702	289	27	26	0.519	.	AGAUAUGUGUGGGUCCUAGUGUGA	2	3	0	1	3	2	18	24	N
Fvb1:20847237-20847642	TE_homo_11663	Fvb1	20847237	20847642	406	14	13	0.643	.	CCAACCUCGGUGGUAGCAUUGGGC	2	2	0	0	1	1	10	24	N
Fvb1:20856064-20856508	TE_homo_11666	Fvb1	20856064	20856508	445	52	34	0.596	.	AAUGAUACCUGACAAGCUGGUGGC	6	0	0	0	5	6	41	24	N
Fvb1:20867267-20867656	TE_homo_11679	Fvb1	20867267	20867656	390	492	181	0.474	.	AACCAAAUCUGUCAAACAUGAACU	55	5	13	9	7	63	395	24	N
Fvb1:20867656-20868019	TE_homo_11680	Fvb1	20867656	20868019	364	99	67	0.535	.	AAAGGUUGAAGAUGCUCUUAAAGG	7	7	0	2	1	13	76	24	N
Fvb1:20879625-20879968	TE_homo_11689	Fvb1	20879625	20879968	344	450	212	0.6	.	AUUCAGCGGAUUCGCCGGGGA	16	45	13	79	49	31	233	24	N
Fvb1:20894217-20894326	TE_homo_11702	Fvb1	20894217	20894326	110	1	1	1	+	AAAAAAGGGAGUGUAGAUUACAAU	1	0	0	0	0	0	1	24	N
Fvb1:20907608-20908030	TE_homo_11708	Fvb1	20907608	20908030	423	691	241	0.492	.	AUAAGUUUGGUCCAAUUUUUGAAU	80	31	16	41	35	99	469	24	N
Fvb1:20908721-20908872	TE_homo_11711	Fvb1	20908721	20908872	152	39	27	0.308	.	AGAUUGUAGCCCAAACAUUGAAGU	7	1	1	2	0	7	28	24	N
Fvb1:20913262-20913697	TE_homo_11720	Fvb1	20913262	20913697	436	78	46	0.41	.	UUUGAACCCUGCACCCUUGCCUGG	7	2	3	9	1	4	59	24	N
Fvb1:20952552-20952722	TE_struc_296	Fvb1	20952552	20952722	171	31	20	0.548	.	AUUCAUUUUCCCUUUUUAGUAACU	4	2	3	0	0	0	26	24	N
Fvb1:20956428-20956596	TE_homo_11754	Fvb1	20956428	20956596	169	1	1	1	+	UCCGGACAAGCCAGACAGUGAGCU	1	0	0	0	0	0	1	24	N
Fvb1:20960940-20961153	TE_homo_11761	Fvb1	20960940	20961153	214	5	5	0.2	.	UUUUCGGUUUUGAAGUCUCAGCC	1	0	0	0	0	2	3	24	N
Fvb1:20970954-20971332	TE_homo_11775	Fvb1	20970954	20971332	379	439	246	0.467	.	AUAUACGGAAACUGGAAUUAUCUC	27	41	2	51	21	49	275	24	N
Fvb1:20979533-20979738	TE_homo_11785	Fvb1	20979533	20979738	206	155	85	0.6	.	AGGAAAAUUCAGCAACGGUGCCUA	18	5	2	5	6	33	104	24	N
Fvb1:20982997-20983173	TE_homo_11790	Fvb1	20982997	20983173	177	110	75	0.373	.	GUAGGACAAAGGGUAUGAGACUCU	8	7	4	4	1	10	84	24	N
Fvb1:20985606-20985734	TE_homo_11792	Fvb1	20985606	20985734	129	24	19	0.292	.	GAUUUCGCCUUCGUUUCGAGGAAU	3	2	1	1	1	5	14	24	N
Fvb1:21001887-21002232	TE_homo_11802	Fvb1	21001887	21002232	346	21	16	0.429	.	AUUCAGCGGACUUGCCAGGGGGGG	3	2	0	2	1	2	14	24	N
Fvb1:21007985-21008240	TE_homo_11816	Fvb1	21007985	21008240	256	6	6	0.167	-	AAUAACUAAAAGACUAUAUAUGGA	1	1	0	0	0	0	5	24	N
Fvb1:21009190-21009660	TE_struc_297	Fvb1	21009190	21009660	471	76	41	0.237	.	AAUCAGAACGGUGAGCUGACGCCU	28	0	1	3	1	3	68	24	N
Fvb1:21017016-21017356	TE_homo_11821	Fvb1	21017016	21017356	341	332	147	0.617	.	AUAGAACGACCGAAUAUGAUAAAU	24	5	5	10	7	56	249	24	N
Fvb1:21021296-21022108	TE_homo_11823	Fvb1	21021296	21022108	813	126	99	0.413	.	AGGAGCAGCUCUGAAUGAGGAAGC	6	8	1	4	5	7	101	24	N
Fvb1:21023507-21023668	TE_homo_11826	Fvb1	21023507	21023668	162	3	3	0.667	.	AACAGCUCCGGACGAACCAGACA	1	0	0	0	0	1	2	24	N
Fvb1:21038504-21039083	TE_homo_11835	Fvb1	21038504	21039083	580	190	60	0.184	-	AAAAACGGAUGUUUGGACACGGCU	30	3	1	2	0	29	155	24	N
Fvb1:21047885-21048016	TE_homo_11846	Fvb1	21047885	21048016	132	1	1	0	-	AGUAGCAAAUUUGACCGAAUGGUA	1	0	0	0	0	0	1	24	N
Fvb1:21047947-21048071	TE_homo_11847	Fvb1	21047947	21048071	125	1	1	0	-	AGUAGCAAAUUUGACCGAAUGGUA	1	0	0	0	0	0	1	24	N
Fvb1:21060094-21060709	TE_homo_11860	Fvb1	21060094	21060709	616	59	44	0.559	.	AGAAAACUCUUAACAAAAAAACCU	4	2	0	2	0	3	52	24	N
Fvb1:21084596-21084798	TE_homo_11869	Fvb1	21084596	21084798	203	491	217	0.354	.	UUUUAAGUCUGCACGUGAAACUGA	30	18	17	21	9	83	343	24	N
Fvb1:21086844-21087217	TE_homo_11873	Fvb1	21086844	21087217	374	310	54	0.81	+	AAAACUGGAAUUCGGCGGACUCGC	170	9	0	2	2	18	279	24	N
Fvb1:21086953-21087258	TE_homo_11874	Fvb1	21086953	21087258	306	321	62	0.788	.	AAAACUGGAAUUCGGCGGACUCGC	170	10	0	3	2	19	287	24	N
Fvb1:21087186-21087480	TE_homo_11875	Fvb1	21087186	21087480	295	62	40	0.177	-	ACGGAUUGUGUAUAUAUAUAUAUA	14	4	0	4	2	10	42	24	N
Fvb1:21088061-21088315	TE_homo_11881	Fvb1	21088061	21088315	255	73	26	0.685	.	GGGACGCUGCUAGAGUCUUCUAGG	36	2	1	3	3	1	63	24	N
Fvb1:21092448-21092637	TE_homo_11893	Fvb1	21092448	21092637	190	210	106	0.571	.	AGAUGUGUUGGAGAGGAAUAGAUC	23	6	4	4	6	22	168	24	N
Fvb1:21094972-21095161	TE_homo_11897	Fvb1	21094972	21095161	190	613	240	0.455	.	GACGGAAAAACUAUUUGGAUGAAA	35	22	6	27	14	112	432	24	N
Fvb1:21104508-21104748	TE_homo_11906	Fvb1	21104508	21104748	241	41	30	0.61	.	GUUGGCGCCGGAGGGUGGAGAAC	6	0	0	3	3	13	22	24	N
Fvb1:21108878-21109018	TE_homo_11915	Fvb1	21108878	21109018	141	416	153	0.373	.	GAGAUUUUUAGACUUGAGUCGAAC	46	15	4	25	7	63	302	24	N
Fvb1:21127117-21127271	TE_homo_11943	Fvb1	21127117	21127271	155	15	11	0.133	-	UUCGGACGAGAAAUACUUGGGAGG	4	0	0	0	0	3	12	24	N
Fvb1:21129791-21130208	TE_homo_11949	Fvb1	21129791	21130208	418	104	34	0.731	.	AGUGAGGACCCUUAAGUUGAGGAC	28	1	2	2	0	7	92	24	N
Fvb1:21136189-21136655	TE_homo_11953	Fvb1	21136189	21136655	467	353	126	0.521	.	AUAUGACGUCACCAAGCUGUUGGA	35	4	3	5	14	54	273	24	N
Fvb1:21140197-21140606	TE_homo_11957	Fvb1	21140197	21140606	410	355	143	0.344	.	GAGAACCAUUAAGUUGAGGACUAG	33	16	6	9	7	50	267	24	N
Fvb1:21143149-21143283	TE_homo_11968	Fvb1	21143149	21143283	135	23	12	0.174	-	AUGAGAUGCCAAGAUGUGAUAGAA	5	2	0	0	0	0	21	24	N
Fvb1:21183192-21183852	TE_struc_298	Fvb1	21183192	21183852	661	35	31	0.543	.	AAUCGGUUGAUCGUUGAAACAGGA	3	0	0	1	0	5	29	24	N
Fvb1:21198220-21198509	TE_homo_12032	Fvb1	21198220	21198509	290	25	6	1	+	AAGAUUUCGUCGGGAAAAGCUCGU	20	1	0	0	0	1	23	24	N
Fvb1:21223542-21223696	TE_homo_12066	Fvb1	21223542	21223696	155	43	33	0.651	.	UUUCGAUUAUGGUCUGUCUAGAGA	4	0	0	2	1	3	37	24	N
Fvb1:21223726-21224359	TE_homo_12067	Fvb1	21223726	21224359	634	154	90	0.591	.	ACGGGACGGGACAAGAUCAGGACU	8	3	0	3	0	19	129	24	N
Fvb1:21228392-21228686	TE_struc_299	Fvb1	21228392	21228686	295	65	16	0.431	.	AAACAAGAGCUCGGAGGGUAAUCU	24	0	1	0	0	0	64	24	N
Fvb1:21237009-21237177	TE_homo_12075	Fvb1	21237009	21237177	169	98	23	0.143	-	AGUGAGGACUUUCAAAUGAAUGGU	39	0	1	0	0	30	67	24	N
Fvb1:21237469-21237787	TE_homo_12077	Fvb1	21237469	21237787	319	33	31	0.576	.	UUAUCCUUCAUUACGUUAUCAUGC	2	0	0	2	0	5	26	24	N
Fvb1:21238753-21238914	TE_homo_12082	Fvb1	21238753	21238914	162	4	3	0.5	.	UCUGCGCGGAAAUUUUUAUGCACU	2	0	0	0	0	0	4	24	N
Fvb1:21253968-21254632	TE_homo_12101	Fvb1	21253968	21254632	665	120	81	0.575	.	AACGUUUUGUAGGACUGGGCACUU	6	4	0	9	1	12	94	24	N
Fvb1:21254976-21255364	TE_homo_12103	Fvb1	21254976	21255364	389	82	50	0.695	.	AUCCAAAUCUGUAAAACAUGAGCU	14	3	3	1	1	10	64	24	N
Fvb1:21274359-21274790	TE_homo_12122	Fvb1	21274359	21274790	432	176	64	0.438	.	UAGGAUGUGACAAAUGGUAUCAGA	32	1	4	3	5	27	136	24	N
Fvb1:21284613-21284733	TE_homo_12130	Fvb1	21284613	21284733	121	3	3	1	+	GGAAAAUUUCGUCGGCUAAGGUGG	1	0	0	0	0	0	3	24	N
Fvb1:21292480-21292598	TE_homo_12141	Fvb1	21292480	21292598	119	148	38	0.392	.	ACUAACAACUUUGAGAUCAUGGGU	45	0	0	1	0	6	141	24	N
Fvb1:21295228-21295311	TE_homo_12144	Fvb1	21295228	21295311	84	41	12	0.171	-	AGGGACUAACAUAAAUUCACCUCU	19	0	0	0	0	3	38	24	N
Fvb1:21295252-21295565	TE_homo_12145	Fvb1	21295252	21295565	314	63	26	0.365	.	AGGGACUAACAUAAAUUCACCUCU	19	1	0	0	0	6	56	24	N
Fvb1:21339306-21339687	TE_homo_12162	Fvb1	21339306	21339687	382	811	289	0.459	.	GAAAAGUAGAAUAAACCGAAAAGU	66	21	17	18	16	145	594	24	N
Fvb1:21358446-21358602	TE_homo_12174	Fvb1	21358446	21358602	157	61	34	0.426	.	AAAUACAAAGUGACGUCUGGAGGA	4	3	0	0	2	8	48	24	N
Fvb1:21359093-21359511	TE_homo_12175	Fvb1	21359093	21359511	419	160	93	0.425	.	AUGAGAUGGGGAAGUUGUUGGACC	21	6	2	4	4	22	122	24	N
Fvb1:21369281-21369583	TE_struc_301	Fvb1	21369281	21369583	303	112	76	0.455	.	AUAGUUGGAGAUGCCCUUAGCUCU	7	3	2	6	1	11	89	24	N
Fvb1:21404309-21404584	TE_homo_12208	Fvb1	21404309	21404584	276	7	4	1	+	AGGGACUAACAUGAAUUCACCUCU	4	0	0	0	0	0	7	24	N
Fvb1:21418902-21419045	TE_homo_12223	Fvb1	21418902	21419045	144	51	32	0.275	.	GAGGACUAAUGUUGCAACUAAAUU	6	0	2	2	0	9	38	24	N
Fvb1:21424224-21424481	TE_homo_12225	Fvb1	21424224	21424481	258	98	50	0.633	.	AUCGAUCGAAGGCAAUUUACCUGC	16	1	0	1	3	14	79	24	N
Fvb1:21426022-21426140	TE_homo_12227	Fvb1	21426022	21426140	119	16	15	0.812	+	CUGUUGGAAAUGCUCUUAAGCAAA	2	0	1	2	1	3	9	24	N
Fvb1:21426133-21426292	TE_homo_12228	Fvb1	21426133	21426292	160	18	15	0.833	+	CUGUUGGAAAUGCUCUUAAGCAAA	2	1	0	2	1	3	11	24	N
Fvb1:21426513-21426624	TE_homo_12229	Fvb1	21426513	21426624	112	6	6	0.667	.	AUUUUCUUCCAUUGGUGCAUCGGC	1	1	0	0	0	1	4	24	N
Fvb1:21426649-21426859	TE_homo_12230	Fvb1	21426649	21426859	211	33	22	0.667	.	GAUGCAACUUUGAAGAUUCAAUUU	4	0	0	1	0	3	29	24	N
Fvb1:21433123-21433574	TE_homo_12234	Fvb1	21433123	21433574	452	1051	349	0.726	.	ACGGAGAAAUUGGAUGAAGAACA	154	28	13	27	26	246	711	24	N
Fvb1:21445383-21445591	TE_homo_12237	Fvb1	21445383	21445591	209	443	142	0.81	+	AAUGGAACAUAUCAUGAAUCGGUA	74	9	4	8	4	57	361	24	N
Fvb1:21453522-21453665	TE_homo_12247	Fvb1	21453522	21453665	144	25	20	0.6	.	AGAUUAAGGGGUUUAUAAAGAAUC	3	2	0	1	0	2	20	24	N
Fvb1:21453666-21453973	TE_homo_12248	Fvb1	21453666	21453973	308	77	38	0.312	.	AGAGAAUAUCCUAGAACAAGAACA	10	0	0	0	0	9	68	24	N
Fvb1:21460488-21460692	TE_homo_12249	Fvb1	21460488	21460692	205	3	3	0.667	.	AUUUUUAGUUGUUGUUUGAGGGUU	1	0	0	0	0	0	3	24	N
Fvb1:21460693-21460867	TE_homo_12250	Fvb1	21460693	21460867	175	5	3	0.2	.	AUCCCGAUCAGGAUCGGGACGGGA	3	1	0	0	0	0	4	24	N
Fvb1:21460998-21461085	TE_homo_12252	Fvb1	21460998	21461085	88	20	12	0.6	.	AUUCCAGAUUAGUAAACAUACCCU	7	1	1	1	0	2	15	24	N
Fvb1:21461293-21461943	TE_homo_12253	Fvb1	21461293	21461943	651	375	68	0.059	-	AACCGGGUGGGACUUAGACUUUCC	201	10	2	2	2	19	340	24	N
Fvb1:21525440-21525825	TE_struc_302	Fvb1	21525440	21525825	386	46	24	0.174	-	AAGUGUAAGGACUAACAUGAAGUC	6	1	1	1	0	1	42	24	N
Fvb1:21550316-21550514	TE_homo_12322	Fvb1	21550316	21550514	199	16	13	0.75	.	AAGAUAGCGUUAGAGGAAAAGAGC	3	0	0	0	0	1	15	24	N
Fvb1:21570302-21570845	TE_homo_12344	Fvb1	21570302	21570845	544	24	21	0.333	.	ACGAAACCGGCGUCGCUUAAGAUU	2	0	0	0	0	2	22	24	N
Fvb1:21589718-21590368	TE_struc_303	Fvb1	21589718	21590368	651	124	43	0.048	-	ACCCGAUUUAAGAAUCUGAAUACU	36	3	8	1	1	8	103	24	N
Fvb1:21589718-21589985	TE_homo_12346	Fvb1	21589718	21589985	268	119	38	0.025	-	ACCCGAUUUAAGAAUCUGAAUACU	36	3	8	1	1	8	98	24	N
Fvb1:21589986-21590368	TE_homo_12347	Fvb1	21589986	21590368	383	5	5	0.6	.	AUACUAGUAAAUUUCAUUAAGAGA	1	0	0	0	0	0	5	24	N
Fvb1:21637020-21637496	TE_struc_304	Fvb1	21637020	21637496	477	213	107	0.526	.	AUUAGAGGUUUGGACAUGCGCAGC	15	10	3	10	1	29	160	24	N
Fvb1:21637497-21637815	TE_homo_12384	Fvb1	21637497	21637815	319	139	89	0.547	.	CAUUAAAAACAUCGUUUGUGACCU	8	8	2	3	6	21	99	24	N
Fvb1:21639442-21639603	TE_homo_12387	Fvb1	21639442	21639603	162	12	11	0.583	.	AUCCGGACGAACCAAACAGUGAGC	2	1	1	1	0	1	8	24	N
Fvb1:21651647-21652157	TE_homo_12400	Fvb1	21651647	21652157	511	13	10	0.308	.	CUACGACGGACCACUUUUUAACGG	4	0	0	0	1	2	10	24	N
Fvb1:21655281-21655769	TE_homo_12410	Fvb1	21655281	21655769	489	35	22	0.857	+	AAGAAUUGAAAUUGGGUGGGACUU	11	1	0	0	1	7	26	24	N
Fvb1:21660169-21660339	TE_homo_12424	Fvb1	21660169	21660339	171	45	32	0.489	.	AAUUUGGGGAGUGUAGAUUUCACU	5	1	3	2	0	2	37	24	N
Fvb1:21722501-21722839	TE_homo_12505	Fvb1	21722501	21722839	339	56	46	0.571	.	GGAGGAGCAGCUCUGGAUGGGGAA	5	5	0	4	1	5	41	24	N
Fvb1:21728173-21728469	TE_homo_12517	Fvb1	21728173	21728469	297	4	3	0	-	ACUUAUGUUACAAUUUUGAGGACU	2	0	0	1	0	1	2	24	N
Fvb1:21768085-21768476	TE_struc_305	Fvb1	21768085	21768476	392	62	44	0.613	.	GGGGAAGCUGUUAGAGAUGCUCUA	5	1	3	1	2	7	48	24	N
Fvb1:21794311-21794511	TE_homo_12566	Fvb1	21794311	21794511	201	107	36	0.785	.	AUGGACUGUCAGAUCUUGAUCUGA	33	0	0	2	4	8	93	24	N
Fvb1:21800838-21801439	TE_struc_306	Fvb1	21800838	21801439	602	14	12	0.5	.	AUGUAAUUCGGUGCGGUUUAGUU	2	1	0	0	0	2	11	24	N
Fvb1:21858859-21859276	TE_homo_12613	Fvb1	21858859	21859276	418	59	22	0.203	.	AAUGGAGAAGCUGUUGAAUUUUGA	14	0	3	0	0	7	49	24	N
Fvb1:21859889-21860288	TE_homo_12615	Fvb1	21859889	21860288	400	33	25	0.576	.	AAGUCAUCGCCAUUCUACAAGAGA	4	0	0	0	0	4	29	24	N
Fvb1:21860273-21860689	TE_homo_12616	Fvb1	21860273	21860689	417	33	19	0.606	.	AGCAAUCGAGGUCUGAAAUAGAUG	7	2	1	1	1	5	23	24	N
Fvb1:21860718-21860836	TE_homo_12617	Fvb1	21860718	21860836	119	45	19	0.378	.	ACACACUCUACAUAUGUCGUGAGG	16	1	0	2	0	4	38	24	N
Fvb1:21860836-21861018	TE_homo_12618	Fvb1	21860836	21861018	183	351	128	0.687	.	CAGGGAGGUACAAUGAGCAAAUCU	56	10	3	14	10	64	250	24	N
Fvb1:21870986-21871392	TE_homo_12629	Fvb1	21870986	21871392	407	109	59	0.45	.	AACGGUCAAGAUGUGGAUAUAAGA	7	0	2	1	0	14	92	24	N
Fvb1:21910837-21911204	TE_homo_12658	Fvb1	21910837	21911204	368	71	36	0.521	.	AGACCUAAAAACUGAACGGAUGAG	16	1	2	0	0	6	62	24	N
Fvb1:21945706-21946070	TE_homo_12706	Fvb1	21945706	21946070	365	41	29	0.512	.	UUUGAUCUUCAAGAAGCCUUGGAC	4	4	0	0	2	5	30	24	N
Fvb1:21948501-21948859	TE_homo_12708	Fvb1	21948501	21948859	359	20	16	0.65	.	ACGGUACCUCUUUCCCUUGAUAGA	3	0	0	0	0	3	17	24	N
Fvb1:22005936-22006333	TE_homo_12761	Fvb1	22005936	22006333	398	20	18	0.4	.	AUUGGCUUUAGGGUUAGAACAAAG	2	0	0	2	0	1	17	24	N
Fvb1:22006424-22006823	TE_homo_12763	Fvb1	22006424	22006823	400	1	1	0	-	CUGUUAUGAGACUCGAUAGAGGUC	1	0	0	0	0	0	1	24	N
Fvb1:22039733-22039847	TE_homo_12794	Fvb1	22039733	22039847	115	5	4	0.6	.	AUACAGUGGUGUUCACAUGAUCAU	2	0	0	1	0	0	4	24	N
Fvb1:22055689-22055862	TE_homo_12806	Fvb1	22055689	22055862	174	29	25	0.69	.	GUAGGAGGUCUAGUGAGUAAAUUC	3	0	2	2	0	6	19	24	N
Fvb1:22060688-22060812	TE_homo_12816	Fvb1	22060688	22060812	125	28	13	0.286	.	AACAGACUAUAUUUCAUCGGCUAU	5	1	0	1	1	0	25	24	N
Fvb1:22060869-22060975	TE_homo_12817	Fvb1	22060869	22060975	107	4	3	0.75	.	CUUUUAAAUAUCGUCGGCUAAACC	2	0	0	0	0	0	4	24	N
Fvb1:22064050-22064391	TE_homo_12824	Fvb1	22064050	22064391	342	18	16	0.222	.	AAUUUUCAUGUCUGGUCACUCACU	2	1	0	2	0	3	12	24	N
Fvb1:22126764-22127307	TE_homo_12891	Fvb1	22126764	22127307	544	414	195	0.295	.	CGACAAGAGAACAUACGUCGCUGA	49	11	5	24	6	65	303	24	N
Fvb1:22152658-22152817	TE_homo_12911	Fvb1	22152658	22152817	160	10	9	0.5	.	AUUGCCCCCUAGGAAACUUCUACU	2	0	0	0	0	2	8	24	N
Fvb1:22166993-22167415	TE_homo_12921	Fvb1	22166993	22167415	423	67	40	0.627	.	AAAGAUAGGCUGAAUGCACCCUGA	6	1	4	2	2	3	55	24	N
Fvb1:22179777-22179937	TE_homo_12933	Fvb1	22179777	22179937	161	3	2	1	+	CGGGAAAAGCUCGUCGGUGAUGAC	2	0	0	0	0	0	3	24	N
Fvb1:22180173-22180302	TE_homo_12936	Fvb1	22180173	22180302	130	2	2	0.5	.	AAACACUAUAUUCGUCGGCUAUAG	1	0	0	0	0	0	2	24	N
Fvb1:22181655-22181922	TE_homo_12939	Fvb1	22181655	22181922	268	4	4	0.5	.	AAUUUCGUCGGCUAAAGUGCCUUA	1	0	0	0	1	0	3	24	N
Fvb1:22187942-22188369	TE_homo_12944	Fvb1	22187942	22188369	428	1091	387	0.419	.	AACUAGACCCAAGAAACUUACACU	131	33	17	60	29	98	854	24	N
Fvb1:22315352-22315503	TE_homo_13083	Fvb1	22315352	22315503	152	28	20	0.821	+	AGGGUGUGUGAAUUUUAAUUUAGG	4	1	0	1	0	6	20	24	N
Fvb1:22324787-22325072	TE_homo_13093	Fvb1	22324787	22325072	286	115	77	0.67	.	AGGACAAUGGUUGAAGAUGCUCUU	6	6	0	6	1	9	93	24	N
Fvb1:22340518-22340853	TE_homo_13112	Fvb1	22340518	22340853	336	136	92	0.654	.	UAAAUUGGACGGAAUUUCAACAAU	8	6	4	2	7	37	80	24	N
Fvb1:22347287-22347575	TE_homo_13120	Fvb1	22347287	22347575	289	18	15	0.278	.	CGGAGCCCGGACAACUAUUCAAG	3	0	0	0	0	6	12	24	N
Fvb1:22375264-22375600	TE_homo_13134	Fvb1	22375264	22375600	337	868	241	0.388	.	CCGACGACGGCGCUCCUCCACCC	179	57	13	139	89	246	324	24	N
Fvb1:22375482-22375634	TE_homo_13135	Fvb1	22375482	22375634	153	622	194	0.241	.	ACGGCGUUUCUCCACCCGAGCGGA	50	49	8	126	71	63	305	24	N
Fvb1:22388983-22389615	TE_homo_13154	Fvb1	22388983	22389615	633	179	135	0.497	.	AAUCAUGUUGUUGAACUGAACGCA	11	17	4	4	4	27	123	24	N
Fvb1:22445730-22445821	TE_homo_13177	Fvb1	22445730	22445821	92	41	28	0.366	.	AACACUUUAGGUUGGAGAUGGCCU	13	1	0	1	0	4	35	24	N
Fvb1:22446639-22446855	TE_homo_13179	Fvb1	22446639	22446855	217	422	170	0.614	.	GGGAAAAGGUCGUCGGUGAUGACU	69	21	10	10	11	69	301	24	N
Fvb1:22492104-22492571	TE_homo_13250	Fvb1	22492104	22492571	468	43	29	0.465	.	AUUCCCGUUGUCGCAUUGAUGAUC	7	0	3	2	0	10	28	24	N
Fvb1:22533584-22533748	TE_homo_13295	Fvb1	22533584	22533748	165	190	92	0.574	.	AUCCAAGGGUGAUUGAUCAUGAUU	22	3	1	8	2	19	157	24	N
Fvb1:22538595-22538775	TE_homo_13300	Fvb1	22538595	22538775	181	220	90	0.595	.	UUUAACCACAAAAGGCCUCGGUAC	31	3	1	1	8	30	177	24	N
Fvb1:22584574-22584742	TE_homo_13357	Fvb1	22584574	22584742	169	1	1	1	+	ACAGCAAUCUGUCCCUUCUGGACA	1	0	0	0	0	0	1	24	N
Fvb1:22612584-22612801	TE_homo_13385	Fvb1	22612584	22612801	218	9	9	0.333	.	UUUCUGCUAUGAUCAAAAUGA	1	1	0	1	0	1	6	24	N
Fvb1:22615741-22616082	TE_homo_13392	Fvb1	22615741	22616082	342	39	26	0.615	.	AGAAUAGACAGAUCAAAAAUGACU	10	1	1	0	0	6	31	24	N
Fvb1:22684561-22685087	TE_homo_13451	Fvb1	22684561	22685087	527	73	57	0.644	.	AGGACAGGACCGGUACGGGAUCGG	3	4	1	5	4	12	47	24	N
Fvb1:22685592-22685894	TE_homo_13452	Fvb1	22685592	22685894	303	87	49	0.805	+	ACCGGACAGAUUUCUAAAAAUGCC	25	3	1	8	5	10	60	24	N
Fvb1:22725025-22725161	TE_homo_13495	Fvb1	22725025	22725161	137	48	26	0.479	.	CUGAGACGGAUGUCUGCACUGCCC	8	0	1	1	1	1	44	24	N
Fvb1:22727743-22727866	TE_homo_13501	Fvb1	22727743	22727866	124	45	36	0.489	.	GCUUGACGGUGGAGAAUUGAGAGA	4	3	1	1	0	8	32	24	N
Fvb1:22733930-22734050	TE_homo_13507	Fvb1	22733930	22734050	121	4	4	0.5	.	ACCCCGACCCAGCUGACCCAACUA	1	0	0	0	0	1	3	24	N
Fvb1:22745979-22746102	TE_homo_13510	Fvb1	22745979	22746102	124	35	23	0.743	.	AGGCCUGUAGUCUCAGCCCAGGGC	7	0	0	3	3	6	23	24	N
Fvb1:22747166-22747248	TE_homo_13514	Fvb1	22747166	22747248	83	11	9	0.273	.	GAAACUUGUAGAUACGAUGUAUAU	2	0	0	0	1	2	8	24	N
Fvb1:22800447-22800558	TE_homo_13569	Fvb1	22800447	22800558	112	73	31	0.658	.	AUGAGAUGAGGAAGCUGUUGGACC	18	2	1	1	3	8	58	24	N
Fvb1:22817555-22817712	TE_homo_13587	Fvb1	22817555	22817712	158	25	12	0.24	.	AAGGCCAAUGUGAUACUCGAACUU	9	0	0	0	0	3	22	24	N
Fvb1:22835649-22835918	TE_homo_13602	Fvb1	22835649	22835918	270	153	108	0.542	.	AAUGGGCAUGUAAUGGGCCGGGCC	4	4	1	7	5	9	127	24	N
Fvb1:22860012-22860161	TE_homo_13635	Fvb1	22860012	22860161	150	158	57	0.741	.	ACGGAGAGGAGAUUUUCAGCGCCU	64	5	2	5	6	7	133	24	N
Fvb1:22861279-22861699	TE_homo_13638	Fvb1	22861279	22861699	421	42	25	0.5	.	AACUGGCAAAACCAGUGGCGGAGC	6	5	0	3	2	5	27	24	N
Fvb1:22867684-22868030	TE_homo_13644	Fvb1	22867684	22868030	347	248	105	0.492	.	AUGAGGACCGCUAAGUUGAAGACU	32	6	6	5	4	24	203	24	N
Fvb1:22870814-22871194	TE_homo_13649	Fvb1	22870814	22871194	381	116	54	0.371	.	UCCGGUAAAACUCCUAUAUAAAGA	26	3	1	2	5	18	87	24	N
Fvb1:22871266-22871380	TE_homo_13651	Fvb1	22871266	22871380	115	14	11	0.643	.	UCGAAAUGUUGAGAGGAAGAUUCU	3	0	0	1	0	0	13	24	N
Fvb1:22877353-22877682	TE_homo_13666	Fvb1	22877353	22877682	330	139	95	0.561	.	AUGAAUUAAUUCUGAAACUCGAAA	16	4	8	7	7	24	89	24	N
Fvb1:22877434-22877772	TE_homo_13667	Fvb1	22877434	22877772	339	122	82	0.639	.	AUGAAUUAAUUCUGAAACUCGAAA	16	3	8	7	5	19	80	24	N
Fvb1:22882922-22883581	TE_homo_13676	Fvb1	22882922	22883581	660	512	208	0.74	.	AAGGACACUUUCAUUUCAUGAACU	80	10	4	12	12	40	434	24	N
Fvb1:22883694-22883799	TE_homo_13678	Fvb1	22883694	22883799	106	111	68	0.387	.	ACCAAUCGAGACGGGAUGGGACGA	8	7	0	4	2	15	83	24	N
Fvb1:22899004-22899266	TE_homo_13689	Fvb1	22899004	22899266	263	916	248	0.878	+	CGGAAAACUGGAAAAGAACGGACU	73	107	55	90	159	96	409	24	N
Fvb1:22912918-22913081	TE_homo_13707	Fvb1	22912918	22913081	164	75	41	0.72	.	AACUGAGAAAAUUGUUUGAAGGAC	9	1	1	2	1	10	60	24	N
Fvb1:22949631-22949767	TE_homo_13735	Fvb1	22949631	22949767	137	51	25	0.549	.	AGUGUUUAACUGACAAUUUUGAGG	12	3	2	2	1	5	38	24	N
Fvb1:23024825-23025231	TE_struc_316	Fvb1	23024825	23025231	407	803	242	0.654	.	AUUGACGGCUGAUCAUGAGACUGC	155	31	5	50	13	109	595	24	N
Fvb1:23086019-23086178	TE_homo_13878	Fvb1	23086019	23086178	160	4	3	1	+	ACACGUAGAGCUUUCCAAUAAUAU	2	0	0	0	0	1	3	24	N
Fvb1:23139272-23139561	TE_homo_13904	Fvb1	23139272	23139561	290	1	1	0	-	AAAUGUCGUGGGCUUUAGUCCAGA	1	0	0	0	0	0	1	24	N
Fvb1:23250206-23250671	TE_struc_320	Fvb1	23250206	23250671	466	5	4	0.2	.	AGAAGGACUAACAUGAUGAUCGAC	2	0	0	0	0	0	5	24	N
Fvb1:23251724-23252228	TE_homo_14033	Fvb1	23251724	23252228	505	5	5	0.8	+	AUAUGAACUCAGAAAUUUACCAGA	1	0	0	0	0	0	5	24	N
Fvb1:23283031-23283433	TE_homo_14060	Fvb1	23283031	23283433	403	636	182	0.539	.	AUGUAGGACCACGUCAGAUUGACA	157	16	9	20	17	82	492	24	N
Fvb1:23283475-23283592	TE_homo_14062	Fvb1	23283475	23283592	118	16	15	0.25	.	AAAUAUCGGGAGUUUCGGAUGAGA	2	0	0	0	0	3	13	24	N
Fvb1:23423919-23424015	TE_homo_14181	Fvb1	23423919	23424015	97	5	4	0.8	+	UAACGCCGUCUAAUGUAUAUCUGG	2	0	0	0	0	1	4	24	N
Fvb1:23452899-23453079	TE_homo_14206	Fvb1	23452899	23453079	181	16	10	0.562	.	AUCGGUACAAUGAUGAUCCACGGG	3	0	0	0	1	1	14	24	N
Fvb1:23464445-23464883	TE_homo_14220	Fvb1	23464445	23464883	439	249	105	0.771	.	UAAAUUGAACUUUUGAAAGCCU	31	6	1	24	49	28	141	24	N
Fvb1:23465786-23466122	TE_homo_14222	Fvb1	23465786	23466122	337	36	28	0.417	.	AUUUUAGAAGGAACAACUUUGCCU	8	1	0	1	0	5	29	24	N
Fvb1:23479317-23479592	TE_homo_14242	Fvb1	23479317	23479592	276	28	17	0.5	.	AGGGAAUUUGUUGGAGCAAAACAC	5	1	0	1	1	5	20	24	N
Fvb1:23512454-23512594	TE_homo_14281	Fvb1	23512454	23512594	141	65	21	0.477	.	ACACACCCUACAUAUGUCGUGAGG	21	2	0	6	1	1	55	24	N
Fvb1:23557257-23557380	TE_homo_14329	Fvb1	23557257	23557380	124	27	13	0.926	+	AUAUAGAGAUACAAUUGUAGUACU	13	1	2	0	0	5	19	24	N
Fvb1:23592731-23592847	TE_homo_14363	Fvb1	23592731	23592847	117	17	13	0.235	.	GGCAAGCUCUUGUUGGAGAGGAGA	2	0	1	0	0	3	13	24	N
Fvb1:23606595-23606710	TE_homo_14376	Fvb1	23606595	23606710	116	21	15	0.857	+	AGAAGACAUAACUCGAGUUGGU	3	0	1	1	3	4	12	24	N
Fvb1:23611068-23611150	TE_homo_14385	Fvb1	23611068	23611150	83	30	21	0.867	+	AACGAGUCGAUUGUCUAUUACGAU	6	2	0	2	1	2	23	24	N
Fvb1:23613359-23613766	TE_homo_14389	Fvb1	23613359	23613766	408	311	134	0.492	.	AAUAAUGAGGACCAGUUGAGGACU	43	8	3	4	5	43	248	24	N
Fvb1:23629863-23629942	TE_homo_14393	Fvb1	23629863	23629942	80	7	5	0.143	-	AAGGACCAAACUGAUUUUAGCCCU	3	0	0	1	0	1	5	24	N
Fvb1:23644216-23644741	TE_homo_14406	Fvb1	23644216	23644741	526	23	18	0.522	.	GUUGAUACCGACUGUUGUUGAUAC	3	0	0	0	0	3	20	24	N
Fvb1:23649011-23649120	TE_homo_14407	Fvb1	23649011	23649120	110	16	16	0.125	-	UAAGAGUAGUGGGGUCAUUGAGAU	1	0	0	1	0	4	11	24	N
Fvb1:23671715-23672043	TE_homo_14416	Fvb1	23671715	23672043	329	133	57	0.406	.	AACGGCCAUGUCAGUAUUCUAACA	32	0	1	1	4	22	105	24	N
Fvb1:23672084-23672387	TE_homo_14417	Fvb1	23672084	23672387	304	160	63	0.425	.	AAUGCUACGAGAGGACCACAUGAC	28	3	2	2	2	18	133	24	N
Fvb1:23672618-23673024	TE_homo_14419	Fvb1	23672618	23673024	407	220	113	0.664	.	AUUGGAAUGUAGAACCACCUGGCA	17	6	1	9	2	40	162	24	N
Fvb1:23688021-23688376	TE_homo_14434	Fvb1	23688021	23688376	356	278	101	0.874	+	AGGGAUAAAUCGAGCUCCAAAACU	52	12	4	12	7	26	217	24	N
Fvb1:23688448-23688560	TE_homo_14436	Fvb1	23688448	23688560	113	50	28	0.76	.	UAGCCGACGAUAUUUAAACACUAU	6	1	3	2	1	7	36	24	N
Fvb1:23712243-23712420	TE_homo_14461	Fvb1	23712243	23712420	178	244	104	0.529	.	AUUGUACCGAGGUCUUUUGUGAUU	18	10	0	5	5	24	200	24	N
Fvb1:23715895-23716363	TE_struc_324	Fvb1	23715895	23716363	469	121	73	0.76	.	AAAGACUAACAUGAUAAUCGACCU	8	5	1	4	2	20	89	24	N
Fvb1:23732609-23732731	TE_homo_14478	Fvb1	23732609	23732731	123	42	25	0.714	.	AUUGUAUCGAGGCCUUAAUUUUGU	13	3	1	2	2	5	29	24	N
Fvb1:23732787-23732973	TE_homo_14479	Fvb1	23732787	23732973	187	132	60	0.788	.	AUUGUAUCGAGACCUUAAUUUUGU	19	4	4	4	4	19	97	24	N
Fvb1:23733246-23733420	TE_homo_14482	Fvb1	23733246	23733420	175	249	125	0.534	.	UUGAGACAGUAUCGGUAAGAGGAU	15	2	3	13	5	33	193	24	N
Fvb1:23733542-23733896	TE_homo_14483	Fvb1	23733542	23733896	355	8	8	0.75	.	AGUUUGGACAAAUCUUGUAUU	1	0	0	1	0	2	5	24	N
Fvb1:23733683-23733905	TE_homo_14484	Fvb1	23733683	23733905	223	13	12	0.692	.	UUACUGCUGAGUAUCAUUUGGUC	2	0	0	2	1	4	6	24	N
Fvb1:23759650-23760001	TE_homo_14498	Fvb1	23759650	23760001	352	257	136	0.409	.	AAACGAUUCUGUCGAACUUGAACC	19	7	6	15	9	36	184	24	N
Fvb1:23770067-23770400	TE_struc_325	Fvb1	23770067	23770400	334	722	283	0.479	.	AGCAGUUAACGUCUGAUUUGGACA	83	26	9	31	16	94	546	24	N
Fvb1:23779718-23780059	TE_homo_14514	Fvb1	23779718	23780059	342	74	48	0.459	.	AUUUAGAGGACUCGCCGGGGAUGG	5	2	0	7	9	10	46	24	N
Fvb1:23787906-23788000	TE_homo_14528	Fvb1	23787906	23788000	95	2	2	0.5	.	AUUGAACGGUUGGAUGACAUGCUU	1	0	0	0	0	0	2	24	N
Fvb1:23814015-23814686	TE_struc_327	Fvb1	23814015	23814686	672	378	184	0.571	.	UCACCGACGGCUCGACUCAUUUGC	37	18	8	18	8	37	289	24	N
Fvb1:23821429-23821812	TE_struc_328	Fvb1	23821429	23821812	384	1096	314	0.549	.	AGGACAUUGGUCACGCUUGACGAA	81	30	17	75	28	148	798	24	N
Fvb1:23823282-23823651	TE_homo_14534	Fvb1	23823282	23823651	370	540	211	0.459	.	AACGGAUAAGAUAUCAAAAUGUGA	31	12	6	12	23	79	408	24	N
Fvb1:23854399-23854717	TE_homo_14542	Fvb1	23854399	23854717	319	108	74	0.546	.	GUGGUCUGUAUAGAAAAAUAGAAA	6	5	0	5	2	19	77	24	N
Fvb1:23868303-23868646	TE_homo_14549	Fvb1	23868303	23868646	344	1178	288	0.786	.	CAGAUACGGACGUCCGCACCGCCU	158	112	7	158	145	82	674	24	N
Fvb1:23868732-23868977	TE_homo_14552	Fvb1	23868732	23868977	246	92	66	0.565	.	GUUUGCGGACGUCCUCUUCUGA	10	6	1	17	20	12	36	24	N
Fvb1:23868783-23869152	TE_homo_14553	Fvb1	23868783	23869152	370	73	27	0.11	-	CUGGACGGACACCAGAGGCAUCCC	30	0	2	12	2	2	55	24	N
Fvb1:23874083-23874243	TE_homo_14562	Fvb1	23874083	23874243	161	14	10	0.143	-	AGAUAUGGACGAACUGUGAAAAGU	5	0	0	0	0	4	10	24	N
Fvb1:23893122-23893348	TE_homo_14579	Fvb1	23893122	23893348	227	306	117	0.373	.	ACCUUAAAGGUGGUUAAGUUGGGA	63	10	4	7	0	28	257	24	N
Fvb1:23893552-23893719	TE_homo_14580	Fvb1	23893552	23893719	168	55	36	0.545	.	UUUAAUCACAAAACGCCUCGGUAC	4	0	0	1	0	7	47	24	N
Fvb1:23940186-23940543	TE_homo_14605	Fvb1	23940186	23940543	358	618	257	0.723	.	AUUUUAGGUAUAUAUGAGUAGAUC	32	9	7	26	16	92	468	24	N
Fvb1:23944077-23944255	TE_homo_14608	Fvb1	23944077	23944255	179	376	127	0.848	+	AAUGUUUUUAACGGUCAUGUCAGC	126	5	5	9	9	49	299	24	N
Fvb1:23946137-23946298	TE_homo_14612	Fvb1	23946137	23946298	162	10	8	0.8	+	GUUAGAACAUGUUGUAUUGGCACU	2	0	0	0	0	1	9	24	N
Fvb1:23946438-23946698	TE_homo_14615	Fvb1	23946438	23946698	261	166	99	0.627	.	AGGGACUAACAUGAAUUCACUUCU	17	10	4	10	3	23	116	24	N
Fvb1:23949278-23949455	TE_homo_14617	Fvb1	23949278	23949455	178	52	32	0.288	.	AUCGGGUAUGGGCUUCACAUAGGA	11	1	0	2	2	5	42	24	N
Fvb1:23949511-23949605	TE_homo_14618	Fvb1	23949511	23949605	95	17	7	0	-	AAUGUAGGUUGCCUUUAAAAGUGA	11	1	0	1	0	1	14	24	N
Fvb1:23959760-23960097	TE_homo_14622	Fvb1	23959760	23960097	338	204	85	0.51	.	AAACAGAUCUAAUGGUGUGAGCCU	49	5	2	5	5	17	170	24	N
Fvb1:23967595-23968035	TE_homo_14626	Fvb1	23967595	23968035	441	506	236	0.555	.	AGCGUUUACUAACAUAUCAAGGUA	27	28	8	11	19	73	367	24	N
Fvb1:23991349-23991638	TE_homo_14641	Fvb1	23991349	23991638	290	60	46	0.65	.	AAAGCAGUGCGGACGUUCGUAGCU	4	1	0	2	3	6	48	24	N
Fvb1:23993057-23993466	TE_homo_14645	Fvb1	23993057	23993466	410	950	129	0.461	.	ACGUGGCAGUCUGACGUGGUCCUA	220	2	4	8	49	233	654	24	N
Fvb1:23993767-23993901	TE_homo_14646	Fvb1	23993767	23993901	135	33	14	0.879	+	ACUCAUGUUAUAACUUUGAAGACU	13	0	0	1	0	3	29	24	N
Fvb1:24000871-24001227	TE_homo_14651	Fvb1	24000871	24001227	357	520	224	0.346	.	AGACCCAAAAACUGAACGAAUAAG	59	6	16	14	8	66	410	24	N
Fvb1:24037656-24037910	TE_homo_14679	Fvb1	24037656	24037910	255	229	97	0.424	.	AUUUAGUGAAGCUUUUGAGGGCCU	39	25	3	5	9	45	142	24	N
Fvb1:24038665-24038957	TE_homo_14682	Fvb1	24038665	24038957	293	6	5	0.833	+	AAUAAACUAUGACACUAGCCCACA	2	0	0	0	0	0	6	24	N
Fvb1:24042239-24042524	TE_homo_14690	Fvb1	24042239	24042524	286	28	21	0.607	.	ACGCCAAGGACUCAUUUUUCAACU	5	1	0	0	1	3	23	24	N
Fvb1:24042661-24043102	TE_homo_14692	Fvb1	24042661	24043102	442	13	8	0.538	.	GAACGGUCCAGCUUAUGUCAAACU	4	0	0	0	0	1	12	24	N
Fvb1:24043250-24043636	TE_struc_331	Fvb1	24043250	24043636	387	74	43	0.676	.	AGUGUAUGGACAAACAUGAAGUCA	10	0	2	1	0	6	65	24	N
Fvb1:24075781-24076037	TE_homo_14708	Fvb1	24075781	24076037	257	52	31	0.558	.	CGCUGCUGGAGUCUUCUGGGG	13	2	0	16	2	4	28	24	N
Fvb1:24076619-24076879	TE_homo_14713	Fvb1	24076619	24076879	261	112	60	0.634	.	AUAGAGGAUCAGAAGCGGACGUUU	8	16	1	4	7	8	76	24	N
Fvb1:24091687-24091986	TE_homo_14734	Fvb1	24091687	24091986	300	105	30	0.124	-	AUGGACUAAACAGAUAUCGACUUC	29	2	1	1	0	3	98	24	N
Fvb1:24093034-24093133	TE_homo_14738	Fvb1	24093034	24093133	100	95	57	0.537	.	CCGCACCACAUGGCCUCUGUGACU	9	8	1	4	3	13	66	24	N
Fvb1:24093134-24093230	TE_homo_14739	Fvb1	24093134	24093230	97	14	8	0.214	.	AGGAAAUCCGAUUUAUCUGCCGGC	6	1	0	1	1	0	11	24	N
Fvb1:24093553-24093802	TE_homo_14742	Fvb1	24093553	24093802	250	2	2	0.5	.	AGACCAAACUUAUAAUUUAUGAAU	1	0	0	0	0	0	2	24	N
Fvb1:24108418-24108793	TE_homo_14749	Fvb1	24108418	24108793	376	206	79	0.951	+	UGGCAACAGAAGCGCCGCCGUCGA	42	15	6	15	12	16	142	24	N
Fvb1:24109410-24109781	TE_homo_14753	Fvb1	24109410	24109781	372	212	121	0.792	.	ACGGACAGAAACCCGCACCGUAAA	23	18	11	17	22	24	120	24	N
Fvb1:24110341-24110610	TE_homo_14761	Fvb1	24110341	24110610	270	965	185	0.824	+	GGGACGCUGCUAGAGUCUUCUAGG	313	22	42	52	45	65	739	24	N
Fvb1:24127249-24127422	TE_homo_14773	Fvb1	24127249	24127422	174	58	41	0.276	.	GAGGUAUUAAACUGAUUUUAGACC	6	7	0	7	2	11	31	24	N
Fvb1:24212991-24213264	TE_homo_14863	Fvb1	24212991	24213264	274	209	149	0.536	.	ACCCCAACGGACUCCAGCAGCAUC	5	27	6	42	20	17	97	24	N
Fvb1:24213198-24213464	TE_homo_14865	Fvb1	24213198	24213464	267	2991	503	0.14	-	ACCCCAGCGGACUCUAGCAGCGUC	1098	187	151	272	144	193	2044	24	N
Fvb1:24213228-24213571	TE_homo_14866	Fvb1	24213228	24213571	344	3166	571	0.141	-	ACCCCAGCGGACUCUAGCAGCGUC	1098	214	157	300	207	208	2080	24	N
Fvb1:24217809-24217891	TE_homo_14872	Fvb1	24217809	24217891	83	1	1	1	+	AAUAGUGCUCAAACAGUAAAUUGU	1	0	0	0	0	0	1	24	N
Fvb2:18382-18543	TE_homo_14893	Fvb2	18382	18543	162	26	21	0.615	.	CUUUGUGAACAGCUCUGGACGA	3	1	1	1	3	6	14	24	N
Fvb2:104478-104678	TE_struc_361	Fvb2	104478	104678	201	17	12	0.824	+	AGAGACAAUCAUGAACUGAAUUCA	4	3	0	0	0	3	11	24	N
Fvb2:117255-117588	TE_struc_362	Fvb2	117255	117588	334	418	192	0.359	.	AAAGUAUAGGGACUAACAUGAAGU	25	20	7	36	11	53	291	24	N
Fvb2:119193-119527	TE_struc_363	Fvb2	119193	119527	335	674	268	0.574	.	CGAUUUGGACAGAAUAUAGGACAU	43	45	7	27	31	70	494	24	N
Fvb2:147631-148127	TE_homo_14990	Fvb2	147631	148127	497	267	171	0.382	.	UUUAGUUCGGGUACUGGAGCUACU	13	11	9	14	12	38	183	24	N
Fvb2:148399-148621	TE_homo_14992	Fvb2	148399	148621	223	68	44	0.765	.	AGAGACGAAAAUAUCCUGAAGAAG	8	0	7	1	2	3	55	24	N
Fvb2:162952-163348	TE_homo_14998	Fvb2	162952	163348	397	1047	363	0.687	.	AUCUUUAUCGUCUCUCUGUGUAGA	83	35	11	21	23	137	820	24	N
Fvb2:170432-170596	TE_homo_15001	Fvb2	170432	170596	165	31	25	0.387	.	GCGGCGUUUUUUAGAACCAUGCCU	3	3	0	1	1	3	23	24	N
Fvb2:170643-171019	TE_homo_15002	Fvb2	170643	171019	377	10	8	0.3	.	UUCCAUUUUUAACCUAUCGGAUGA	2	0	0	3	0	0	7	24	N
Fvb2:214945-215269	TE_homo_15033	Fvb2	214945	215269	325	116	56	0.371	.	AAAACUGGAAUUCGGCGGACUUGC	20	6	2	7	12	15	74	24	N
Fvb2:253179-253893	TE_struc_364	Fvb2	253179	253893	715	36	28	0.333	.	UUUCAGGAUAGUCCCGUCCCGUCC	5	2	0	0	1	3	30	24	N
Fvb2:274845-275240	TE_homo_15066	Fvb2	274845	275240	396	190	98	0.332	.	CUCUAGGGUUAGAACAAAGUGCAU	32	1	0	12	4	19	154	24	N
Fvb2:275330-275735	TE_homo_15068	Fvb2	275330	275735	406	91	57	0.363	.	ACAUUCUGCUCCUUUGAGUUUUGA	11	2	0	4	1	21	63	24	N
Fvb2:277327-277493	TE_homo_15071	Fvb2	277327	277493	167	11	9	0.364	.	AGCAAUCUAUCCCUUCUGGACAGU	2	1	0	0	1	0	9	24	N
Fvb2:290723-290950	TE_homo_15084	Fvb2	290723	290950	228	2	2	1	+	UUUUGUCCACUUGUUAAUUCAUGA	1	0	0	0	0	0	2	24	N
Fvb2:329990-330169	TE_homo_15108	Fvb2	329990	330169	180	13	10	0.077	-	CCCACCCAAAAGCUCUAUCGGACU	3	0	0	1	0	2	10	24	N
Fvb2:366036-366218	TE_homo_15134	Fvb2	366036	366218	183	45	32	0.511	.	AGAGUUCGUUGCAAAUAUAGAAGA	8	3	0	1	0	6	35	24	N
Fvb2:445997-446149	TE_homo_15176	Fvb2	445997	446149	153	75	39	0.173	-	AGUGAUUGGUGACGCUGCUGGAGU	9	6	0	3	3	11	52	24	N
Fvb2:446067-446326	TE_homo_15177	Fvb2	446067	446326	260	202	73	0.609	.	AAACUGGAAUUCGGCGGACUCGCC	42	11	0	8	10	15	158	24	N
Fvb2:482773-482978	TE_homo_15209	Fvb2	482773	482978	206	35	20	0.2	.	AGAAAAGGACUUGAUAAUUGUUUC	4	0	0	0	1	5	29	24	N
Fvb2:483080-483211	TE_homo_15210	Fvb2	483080	483211	132	11	10	0.818	+	UAUAGCCUACUGACUA	2	2	0	0	0	2	7	24	N
Fvb2:512708-513006	TE_homo_15257	Fvb2	512708	513006	299	19	11	0.789	.	ACUUUUGGGAUGAAUAAGGGCUCC	9	1	0	0	0	2	16	24	N
Fvb2:633785-634226	TE_homo_15312	Fvb2	633785	634226	442	31	24	0.742	.	AGGGAUCCCUCGUUGGAAGGGCU	3	1	0	2	1	8	19	24	N
Fvb2:656710-656878	TE_homo_15325	Fvb2	656710	656878	169	1	1	0	-	AGCAAUCUGUCCCUUCUGAACAGU	1	0	0	0	0	0	1	24	N
Fvb2:658960-659356	TE_homo_15330	Fvb2	658960	659356	397	12	12	0.333	.	GAGCAAUCUUGAAAUCUGUGGUUU	1	1	0	1	1	1	8	24	N
Fvb2:666514-666867	TE_homo_15340	Fvb2	666514	666867	354	19	17	0.579	.	GCGGAAGGAGGAACAAUUAUGAGU	2	2	0	1	0	2	14	24	N
Fvb2:678543-678909	TE_homo_15350	Fvb2	678543	678909	367	91	40	0.637	.	AAGAAGCCUUUGGACGCAUCCAUA	37	0	2	4	0	7	78	24	N
Fvb2:691068-691286	TE_homo_15366	Fvb2	691068	691286	219	62	29	0.839	+	GAAACAGACUAUAUUUCGUCGGCU	14	2	1	2	0	5	52	24	N
Fvb2:694050-694217	TE_homo_15372	Fvb2	694050	694217	168	59	35	0.508	.	GGGAAAAGGUCGUCGGUGAUGACU	6	1	0	0	2	7	49	24	N
Fvb2:725315-725431	TE_homo_15395	Fvb2	725315	725431	117	119	64	0.689	.	AGCCAAUUUGAUAAUCGUUAAGGC	13	4	4	4	2	13	92	24	N
Fvb2:762161-762253	TE_homo_15417	Fvb2	762161	762253	93	11	7	0.273	.	AUUCGGCUCCUCUAAAGUAAAGUU	4	1	0	0	0	2	8	24	N
Fvb2:782578-782995	TE_struc_370	Fvb2	782578	782995	418	1883	376	0.349	.	AUGAGAUGGGGAAGCUGUUGGACC	324	115	52	62	46	279	1329	24	N
Fvb2:784186-784293	TE_homo_15424	Fvb2	784186	784293	108	3	3	0.333	.	UUACUCAUAAUGAACUAUUUACU	1	0	0	0	0	1	2	24	N
Fvb2:785942-786349	TE_homo_15428	Fvb2	785942	786349	408	60	29	0.267	.	AUCCAAAUCUGUCAAACAUGAACU	24	2	0	1	1	2	54	24	N
Fvb2:822132-822779	TE_homo_15455	Fvb2	822132	822779	648	288	110	0.75	.	AAGGCUGACAUGCGACGACGAUGU	34	7	4	5	3	44	225	24	N
Fvb2:831036-831479	TE_homo_15457	Fvb2	831036	831479	444	240	98	0.537	.	AUAAAAUUUUGUAGAGGUGAUCUA	27	4	4	32	23	45	132	24	N
Fvb2:837304-837407	TE_homo_15466	Fvb2	837304	837407	104	3	3	0	-	AAUAUUGUCGGCUAAAGUUGCUGG	1	0	0	0	0	1	2	24	N
Fvb2:839515-839612	TE_homo_15475	Fvb2	839515	839612	98	3	3	0.333	.	CUAUAAAUUGUUAUUCUAACGUGC	1	0	0	0	0	0	3	24	N
Fvb2:918431-918526	TE_homo_15530	Fvb2	918431	918526	96	3	3	0.333	.	CAAUUAUUUACUCUAUAAGCAUGU	1	0	0	0	0	1	2	24	N
Fvb2:925149-925545	TE_homo_15540	Fvb2	925149	925545	397	86	53	0.64	.	UCACCCUGAGAACCGGCCGGAAAG	8	1	0	10	2	9	64	24	N
Fvb2:1024367-1024541	TE_homo_15595	Fvb2	1024367	1024541	175	1	1	0	-	UUGCAAUUUGGAGUGUAAAACUUC	1	0	0	0	0	0	1	24	N
Fvb2:1119478-1119737	TE_homo_15636	Fvb2	1119478	1119737	260	326	192	0.632	.	ACGGACUCGCCGGUGAGGGAA	25	12	1	56	15	35	207	24	N
Fvb2:1218044-1218252	TE_homo_15668	Fvb2	1218044	1218252	209	9	6	0.778	.	AGAAAAAUAGGAUAAGGAUUCUCU	3	0	0	0	0	0	9	24	N
Fvb2:1219646-1219813	TE_homo_15671	Fvb2	1219646	1219813	168	7	7	0.571	.	AACCGAUCGAUGCUAAAUUAUAGC	1	0	0	0	0	1	6	24	N
Fvb2:1227375-1227467	TE_homo_15674	Fvb2	1227375	1227467	93	13	9	0.231	.	ACCGGACCCAAAAAUUAAUUGAUC	3	0	0	0	1	3	9	24	N
Fvb2:1229999-1230125	TE_homo_15678	Fvb2	1229999	1230125	127	3	3	1	+	GUAAAGCAUUAGAUUAAUGAGUA	1	0	0	0	0	1	2	24	N
Fvb2:1230250-1230349	TE_homo_15679	Fvb2	1230250	1230349	100	27	16	0.741	.	CAAUUCGUGAACUGAACAAGGCCU	8	1	0	0	1	3	22	24	N
Fvb2:1263575-1263965	TE_homo_15685	Fvb2	1263575	1263965	391	132	61	0.205	.	AGCCAGGAUUGGAACCUUAGAGGG	25	9	4	6	1	11	101	24	N
Fvb2:1284294-1284474	TE_homo_15689	Fvb2	1284294	1284474	181	19	7	0.632	.	AAUGUCUGAAAUUAUGGGUCGCCU	6	0	0	1	0	0	18	24	N
Fvb2:1284472-1284682	TE_homo_15690	Fvb2	1284472	1284682	211	25	18	0.28	.	AAUGUCUGAAAUUAUGGGUCGCCU	6	0	0	1	1	4	19	24	N
Fvb2:1288512-1288881	TE_struc_379	Fvb2	1288512	1288881	370	22	19	0.5	.	ACCGUAAUGUAGCUCCGCCACUGG	2	4	0	1	0	4	13	24	N
Fvb2:1290270-1290757	TE_homo_15694	Fvb2	1290270	1290757	488	73	51	0.699	.	CUGAUCAGCAUACUUUGACCGCCU	11	3	2	4	0	13	51	24	N
Fvb2:1311757-1311848	TE_homo_15710	Fvb2	1311757	1311848	92	191	46	0.382	.	AUAUGUCCGUGAGGUUUGAACCCG	62	1	3	2	5	9	171	24	N
Fvb2:1335688-1335811	TE_homo_15716	Fvb2	1335688	1335811	124	37	16	0.865	+	AGAGAACAUGGACUGAAAUGAAGU	7	1	0	0	0	10	26	24	N
Fvb2:1342820-1342915	TE_homo_15720	Fvb2	1342820	1342915	96	19	14	0.474	.	CCUAGAAUUCACCUUGGUGUCAAU	3	1	0	1	2	2	13	24	N
Fvb2:1342838-1342969	TE_homo_15721	Fvb2	1342838	1342969	132	19	14	0.421	.	CCUAGAAUUCACCUUGGUGUCAAU	3	1	0	1	2	1	14	24	N
Fvb2:1342859-1343174	TE_homo_15722	Fvb2	1342859	1343174	316	117	50	0.863	+	AAUGUUUGGACGGAGAAAUUGAUC	25	2	0	2	4	17	92	24	N
Fvb2:1342923-1343215	TE_homo_15723	Fvb2	1342923	1343215	293	106	44	0.896	+	AAUGUUUGGACGGAGAAAUUGAUC	25	1	0	3	2	16	84	24	N
Fvb2:1364423-1364808	TE_homo_15743	Fvb2	1364423	1364808	386	263	108	0.741	.	UCUAGAAUUUGGGCAAAUCGGACC	30	13	8	27	7	44	164	24	N
Fvb2:1376708-1377121	TE_homo_15749	Fvb2	1376708	1377121	414	212	108	0.231	.	AUGAGAUGGGAAAGCUGUUGGACC	22	12	5	2	7	52	134	24	N
Fvb2:1395420-1395537	TE_homo_15763	Fvb2	1395420	1395537	118	9	9	0.556	.	CUAAAGUUUAUAAUAGGAUAUGA	1	0	1	1	0	1	6	24	N
Fvb2:1404477-1404886	TE_homo_15764	Fvb2	1404477	1404886	410	538	182	0.645	.	AGGGAAUAAGAUGAGGAAACUGUU	110	28	25	16	12	74	383	24	N
Fvb2:1420285-1420716	TE_homo_15772	Fvb2	1420285	1420716	432	5	5	0.8	+	AUGAUUUGGUGAUCGUUAAGACUU	1	0	1	0	0	1	3	24	N
Fvb2:1437673-1438251	TE_homo_15778	Fvb2	1437673	1438251	579	56	36	0.482	.	GAGAAAAACUGUCUGGGCUAUAGC	6	1	1	1	1	7	45	24	N
Fvb2:1438546-1438955	TE_struc_380	Fvb2	1438546	1438955	410	127	40	0.811	+	GUGAGGACUCUUAAGUUGAAGACU	27	0	4	2	0	9	112	24	N
Fvb2:1518608-1518718	TE_homo_15821	Fvb2	1518608	1518718	111	9	9	0.778	.	UAUUGAUUAACUAGCUGAAGAGCU	1	0	0	0	0	2	7	24	N
Fvb2:1561749-1562141	TE_homo_15831	Fvb2	1561749	1562141	393	979	351	0.809	+	UAGAGAUUUAAGCAGGAUAAGACU	59	41	25	32	24	138	719	24	N
Fvb2:1571543-1571664	TE_homo_15840	Fvb2	1571543	1571664	122	6	5	0.5	.	CUCAGACAGAAUGCAAAAGAAAGC	2	0	0	0	0	2	4	24	N
Fvb2:1573454-1573537	TE_homo_15842	Fvb2	1573454	1573537	84	3	3	0	-	CUACGGAUGUAACUGUGCAUGUCU	1	0	0	0	0	0	3	24	N
Fvb2:1576334-1576788	TE_struc_385	Fvb2	1576334	1576788	455	11	7	0.909	+	ACAUAUGAACUGUAGAAUCCUAAC	2	0	0	0	0	3	8	24	N
Fvb2:1576909-1577204	TE_homo_15846	Fvb2	1576909	1577204	296	5	5	0.4	.	GCUGGGACUUAGAGNUGUAUUAGU	1	1	0	0	0	0	4	24	N
Fvb2:1596762-1597146	TE_homo_15870	Fvb2	1596762	1597146	385	20	7	0.85	+	AAACGGAAUAUGAGAAUUUGGGCA	11	1	0	0	1	3	15	24	N
Fvb2:1606010-1606137	TE_struc_386	Fvb2	1606010	1606137	128	4	2	0.25	.	GUUGUGUGUUGUGGCCAUGAAACU	3	0	0	0	0	0	4	24	N
Fvb2:1632116-1632536	TE_struc_388	Fvb2	1632116	1632536	421	16	10	0.375	.	ACCCAAAUUAGUGUUCGUUAAGAU	7	0	0	0	0	1	15	24	N
Fvb2:1642834-1642920	TE_homo_15904	Fvb2	1642834	1642920	87	1	1	1	+	UCAACGUUGUUAGUUAGACUGCCU	1	0	0	0	0	0	1	24	N
Fvb2:1670622-1670770	TE_homo_15912	Fvb2	1670622	1670770	149	1	1	1	+	AUGAACGGUUGGAUUAAAUGCACA	1	0	0	0	0	0	1	24	N
Fvb2:1693122-1693293	TE_struc_390	Fvb2	1693122	1693293	172	100	48	0.76	.	GCGGACAACCGAUGAUUAGCGCCU	16	3	0	5	1	22	69	24	N
Fvb2:1720725-1721054	TE_homo_15921	Fvb2	1720725	1721054	330	196	103	0.536	.	ACAAGAAUUGCACAGAUGUUGACU	10	5	4	12	2	18	155	24	N
Fvb2:1734435-1734567	TE_homo_15926	Fvb2	1734435	1734567	133	242	88	0.521	.	AUUUGUUUUAUAUAUCGGCUGAGC	36	10	3	6	5	33	185	24	N
Fvb2:1746061-1746483	TE_homo_15927	Fvb2	1746061	1746483	423	339	121	0.513	.	AGGACUUGGUAAGGACUUUUCGGU	23	10	4	10	3	52	260	24	N
Fvb2:1752249-1752423	TE_homo_15932	Fvb2	1752249	1752423	175	448	125	0.283	.	AAGGAAUGAGUGGCUUUGAUUGUC	90	16	8	6	11	44	363	24	N
Fvb2:1772599-1772795	TE_homo_15945	Fvb2	1772599	1772795	197	68	31	0.721	.	GUGAUCUUUGUCGUUAAAUGACUU	12	1	3	5	2	18	39	24	N
Fvb2:1775286-1775941	TE_struc_392	Fvb2	1775286	1775941	656	202	108	0.663	.	AUCCCCGUUACCCGUUUAUACCCG	16	4	0	6	5	28	159	24	N
Fvb2:1776667-1776822	TE_homo_15949	Fvb2	1776667	1776822	156	130	32	0.038	-	ACGGGGAUUGAAAUGAGGUCAACU	51	1	0	1	2	27	99	24	N
Fvb2:1777154-1777441	TE_homo_15951	Fvb2	1777154	1777441	288	27	27	0.37	.	AUAGGGAGCUCUUCAAAUGAGGAC	1	2	2	0	0	3	20	24	N
Fvb2:1777451-1777816	TE_homo_15952	Fvb2	1777451	1777816	366	43	24	0.326	.	AUUCGGGUUUGACUUCAUUUCAGU	12	0	0	0	0	5	38	24	N
Fvb2:1778480-1778871	TE_homo_15953	Fvb2	1778480	1778871	392	137	82	0.38	.	AAUGCAAUCGGUUGAGGAAACAAU	8	6	1	5	0	22	103	24	N
Fvb2:1782853-1782992	TE_homo_15959	Fvb2	1782853	1782992	140	40	29	0.5	.	GUACCUAUCGUUCUCUCCACACCU	3	3	1	3	3	5	25	24	N
Fvb2:1784950-1785053	TE_homo_15961	Fvb2	1784950	1785053	104	18	16	0.778	.	ACUUGAGAGUCUCUGAACGCCCCU	3	3	0	1	0	3	11	24	N
Fvb2:1794427-1794719	TE_homo_15963	Fvb2	1794427	1794719	293	26	26	0.538	.	AGUGAUCGGGGACGCCUCUGGUGU	1	1	0	2	0	3	20	24	N
Fvb2:1795116-1795444	TE_homo_15965	Fvb2	1795116	1795444	329	115	57	0.322	.	CCGAGAUUGAUCUUGUCUGAAGCC	12	22	1	2	2	5	83	24	N
Fvb2:1797381-1797569	TE_homo_15968	Fvb2	1797381	1797569	189	40	15	0.925	+	AAUGAGACUGCUAACUUUUACUAG	18	1	0	0	0	3	36	24	N
Fvb2:1809766-1809859	TE_homo_15972	Fvb2	1809766	1809859	94	7	7	0	-	UUAGAACCUUGGCAGCACGUCUCCC	1	0	1	1	1	1	3	24	N
Fvb2:1865807-1865919	TE_homo_15995	Fvb2	1865807	1865919	113	23	15	0.696	.	AAGCCGAGUGCGGACGUCCGCUCU	5	2	0	3	1	1	16	24	N
Fvb2:1865836-1866164	TE_homo_15996	Fvb2	1865836	1866164	329	300	177	0.677	.	AAACCGGAAAAGAAUGGACUCGCU	21	27	4	29	22	24	194	24	N
Fvb2:1867509-1867700	TE_homo_15999	Fvb2	1867509	1867700	192	143	82	0.531	.	UUUAAUCACAAAAUGCCUCGGUC	10	2	4	3	4	23	107	24	N
Fvb2:1868044-1868330	TE_homo_16000	Fvb2	1868044	1868330	287	45	35	0.444	.	AUCAGAAAGUUCCAAUUGGAUUGU	4	1	0	3	1	3	37	24	N
Fvb2:1871060-1871182	TE_homo_16002	Fvb2	1871060	1871182	123	21	14	0.381	.	UUUAAUCACAAAAGGCCUUGGUAC	6	0	0	0	0	2	19	24	N
Fvb2:1901657-1901979	TE_homo_16030	Fvb2	1901657	1901979	323	52	33	0.731	.	CAAUUCGAGGACAACGGAAAAAAU	5	1	1	2	0	4	44	24	N
Fvb2:1906416-1906850	TE_homo_16033	Fvb2	1906416	1906850	435	71	50	0.718	.	AUUCCGACAUGGGUGAAUUCCGGC	6	2	1	2	2	12	52	24	N
Fvb2:1927010-1927190	TE_homo_16036	Fvb2	1927010	1927190	181	53	30	0.623	.	AUCGGUACAAUGAUGAUCCACGGG	7	0	1	2	0	6	44	24	N
Fvb2:1927433-1927607	TE_homo_16037	Fvb2	1927433	1927607	175	70	47	0.486	.	UUGGGACAGUAUCGAUACAAUGAU	5	3	4	3	2	5	53	24	N
Fvb2:1940369-1940476	TE_homo_16040	Fvb2	1940369	1940476	108	28	18	0.786	.	GCACACUUUAUAUCAAACAUGGAC	7	2	0	1	0	6	19	24	N
Fvb2:1958429-1958556	TE_homo_16063	Fvb2	1958429	1958556	128	6	6	0.833	+	AUGGUCAUUUACUCUUUUUUUUGG	1	0	0	1	0	1	4	24	N
Fvb2:2089459-2089671	TE_homo_16170	Fvb2	2089459	2089671	213	23	16	0.261	.	ACGUGACACUGAAACUGGGUAGCA	4	1	0	1	1	0	20	24	N
Fvb2:2121822-2122093	TE_homo_16193	Fvb2	2121822	2122093	272	76	51	0.303	.	AGAAAAUAAUGGACUCGCCGGGGA	7	4	2	6	3	15	46	24	N
Fvb2:2223195-2223485	TE_homo_16250	Fvb2	2223195	2223485	291	23	10	0.087	-	ACCUUCGUCGGCUAAGAUCUUAGC	9	0	0	0	0	1	22	24	N
Fvb2:2251427-2252653	TE_homo_16264	Fvb2	2251427	2252653	1227	22	20	0.636	.	AUCCUAUCUUUGAACAGUCGAAAU	3	0	0	2	1	2	17	24	N
Fvb2:2274835-2275521	TE_homo_16278	Fvb2	2274835	2275521	687	27	22	0.704	.	AUACUAUCCCUGAAAAAUCGUGGA	5	0	1	1	0	3	22	24	N
Fvb2:2275522-2276074	TE_struc_395	Fvb2	2275522	2276074	553	42	31	0.595	.	AUCCUAUCUUUGAACAGUCGAAAU	9	0	1	3	1	8	29	24	N
Fvb2:2276289-2276710	TE_homo_16279	Fvb2	2276289	2276710	422	257	96	0.716	.	GUAGGAUCACGUCAUAUUGUCAUG	75	9	5	8	5	35	195	24	N
Fvb2:2349774-2349898	TE_homo_16315	Fvb2	2349774	2349898	125	52	36	0.692	.	AUAAUAAACGAUCAAUGAAAAAGU	7	3	1	1	1	5	41	24	N
Fvb2:2350111-2350476	TE_homo_16316	Fvb2	2350111	2350476	366	210	84	0.757	.	GAAGACCACUAAUUUAAGGACUAG	30	2	2	7	1	19	179	24	N
Fvb2:2350665-2351091	TE_homo_16318	Fvb2	2350665	2351091	427	562	208	0.505	.	ACAAGGAUUACUAAGUUGAGGACU	94	24	9	14	6	69	440	24	N
Fvb2:2360491-2361228	TE_struc_396	Fvb2	2360491	2361228	738	176	110	0.551	.	UUACCGGUCUGGGCUGACCCAAGC	12	10	4	13	3	15	131	24	N
Fvb2:2362194-2362512	TE_homo_16322	Fvb2	2362194	2362512	319	307	83	0.821	+	CUAGUCAUAAAGGAUAGUGGGCCU	102	7	3	2	1	73	221	24	N
Fvb2:2362496-2362818	TE_homo_16323	Fvb2	2362496	2362818	323	33	21	0.394	.	UAUACGUUUAUGUUGUCUGUAAGU	8	1	0	0	1	6	25	24	N
Fvb2:2383755-2384093	TE_homo_16336	Fvb2	2383755	2384093	339	54	41	0.796	.	GAAUUAAUUUUGAAAAUCGAAACU	3	1	0	1	0	6	46	24	N
Fvb2:2392968-2393266	TE_homo_16341	Fvb2	2392968	2393266	299	541	154	0.593	.	AAACUGAAAUUCGGCGGACUCGCC	98	37	7	198	55	25	219	24	N
Fvb2:2496784-2497035	TE_homo_16372	Fvb2	2496784	2497035	252	44	30	0.455	.	UGGCGAACGGACGGAAAUCAGCAC	5	3	0	2	4	2	33	24	N
Fvb2:2501910-2502015	TE_homo_16378	Fvb2	2501910	2502015	106	39	20	0.821	+	CAAAAUUUGACAGAAUCUUCCUCU	5	0	0	2	1	5	31	24	N
Fvb2:2504867-2505031	TE_homo_16387	Fvb2	2504867	2505031	165	1	1	1	+	GUGGCCAUGAAACUGAAAAGGAGA	1	0	0	0	0	0	1	24	N
Fvb2:2508489-2508719	TE_homo_16390	Fvb2	2508489	2508719	231	3	3	0.667	.	UAAAUAACAUUUUGACCUCACUCU	1	0	0	0	0	0	3	24	N
Fvb2:2518327-2518930	TE_homo_16404	Fvb2	2518327	2518930	604	21	19	0.429	.	ACGAUGGGUCACUUCUUAACGGGC	2	1	0	0	1	3	16	24	N
Fvb2:2518931-2519614	TE_homo_16405	Fvb2	2518931	2519614	684	72	43	0.472	.	AGUACGAGUGUAGCUAUUGGGACC	12	2	1	4	1	11	53	24	N
Fvb2:2523057-2523374	TE_homo_16409	Fvb2	2523057	2523374	318	18	18	0.389	.	UUUUGGUUUAAUGACGAGUCUAUC	1	1	0	1	1	3	12	24	N
Fvb2:2533329-2533674	TE_homo_16417	Fvb2	2533329	2533674	346	7	6	0.714	.	UAUAUGUAUAGGCUUGUGGAUAGC	2	0	0	0	0	0	7	24	N
Fvb2:2546906-2547027	TE_homo_16426	Fvb2	2546906	2547027	122	173	73	0.387	.	UACAUAUGUUUGAACCAGUGACCU	32	8	0	13	3	34	115	24	N
Fvb2:2567595-2567940	TE_homo_16444	Fvb2	2567595	2567940	346	5	5	0.8	+	UGGGAGGGGGAGAUUGAUGGGUC	1	0	0	0	0	2	3	24	N
Fvb2:2614780-2614886	TE_homo_16481	Fvb2	2614780	2614886	107	50	26	0.18	-	ACUAAUUUUACUACUCUGAAGACU	7	0	1	1	1	9	38	24	N
Fvb2:2614989-2615204	TE_homo_16482	Fvb2	2614989	2615204	216	123	51	0.764	.	ACUUGAGGAUUGCUAUUGUAACUA	25	5	3	1	0	21	93	24	N
Fvb2:2615204-2615618	TE_homo_16483	Fvb2	2615204	2615618	415	539	232	0.694	.	AGAGAAACUGUUGGAGUUAGAGCA	34	51	16	16	17	85	354	24	N
Fvb2:2624086-2624503	TE_homo_16491	Fvb2	2624086	2624503	418	80	34	0.6	.	AGUGAGGACCUUAAGUUGAGGACU	19	1	0	0	1	10	68	24	N
Fvb2:2624904-2625274	TE_struc_405	Fvb2	2624904	2625274	371	60	42	0.667	.	ACAAGACAAGAUCUAUUAAGCGCC	5	3	3	4	1	4	45	24	N
Fvb2:2653649-2654015	TE_homo_16502	Fvb2	2653649	2654015	367	279	114	0.179	-	GAUGAAAAUAAAAAUGUAGGGACU	77	13	3	13	12	35	203	24	N
Fvb2:2670128-2670253	TE_homo_16523	Fvb2	2670128	2670253	126	80	34	0.562	.	ACUAACAACUUUGAGGUCACGGGU	15	4	4	3	1	12	56	24	N
Fvb2:2686211-2686373	TE_homo_16536	Fvb2	2686211	2686373	163	50	38	0.34	.	ACCUGAUGACUAGCACUGACCAGC	6	2	4	4	3	5	32	24	N
Fvb2:2688739-2688854	TE_homo_16539	Fvb2	2688739	2688854	116	3	3	1	+	CAUAUGUCAGUGUGGUUUUAACU	1	0	0	0	0	1	2	24	N
Fvb2:2708204-2708420	TE_homo_16547	Fvb2	2708204	2708420	217	379	99	0.797	.	AACUGUACUCGGAACACCACGUGG	151	4	2	7	6	12	348	24	N
Fvb2:2721722-2722004	TE_struc_333	Fvb2	2721722	2722004	283	145	76	0.338	.	AGGACGAAUAACUGUAUAAUACGG	28	6	7	4	4	14	110	24	N
Fvb2:2734936-2735207	TE_homo_16563	Fvb2	2734936	2735207	272	35	23	0.514	.	GACCACUUCCCCUCCCCGGCGAGU	5	1	0	6	2	5	21	24	N
Fvb2:2743313-2743576	TE_homo_16570	Fvb2	2743313	2743576	264	44	17	0.318	.	GAUGAAAUUGAAAGUUUAGGGACU	24	1	0	2	1	3	37	24	N
Fvb2:2808945-2809237	TE_homo_16597	Fvb2	2808945	2809237	293	49	36	0.592	.	GAAAUUUGUCAACUUUUAGGAUGA	3	0	0	0	0	6	43	24	N
Fvb2:2814729-2815023	TE_struc_408	Fvb2	2814729	2815023	295	358	101	0.254	.	GAGAAUCUGUUGGAGUUGUAGAAG	74	5	1	4	3	28	317	24	N
Fvb2:2815514-2815682	TE_homo_16606	Fvb2	2815514	2815682	169	151	72	0.457	.	AGAAACGGAUUAUUAUAAGGAUGU	23	5	1	3	0	28	114	24	N
Fvb2:2824407-2824588	TE_homo_16608	Fvb2	2824407	2824588	182	355	146	0.563	.	AUGUGUCACCAAUCUAGAUAGUGG	30	8	4	17	10	44	272	24	N
Fvb2:2824614-2825035	TE_homo_16609	Fvb2	2824614	2825035	422	1276	448	0.417	.	UUGAGAUCCAUACGAUAAGAAACU	80	47	28	29	25	164	983	24	N
Fvb2:2834626-2834781	TE_homo_16612	Fvb2	2834626	2834781	156	22	14	0.545	.	CCGAAUAAGAGCUUUAUAUAGAGA	3	0	0	0	0	2	20	24	N
Fvb2:2834760-2835220	TE_homo_16613	Fvb2	2834760	2835220	461	186	90	0.543	.	ACUAAAUUGAACUUUUGAAAGCCU	19	1	1	13	12	15	144	24	N
Fvb2:2841272-2841434	TE_homo_16620	Fvb2	2841272	2841434	163	8	7	0.375	.	AGAGUUGCGUGUGUUUUUUGUAGA	2	0	0	0	0	2	6	24	N
Fvb2:2851419-2851690	TE_homo_16623	Fvb2	2851419	2851690	272	189	89	0.487	.	AAAGACAAUUCUCAUAGACGGUGU	20	5	2	5	5	25	147	24	N
Fvb2:2859737-2859925	TE_homo_16624	Fvb2	2859737	2859925	189	3	3	0.667	.	UUCGGGUCGGGGAACCAGUAGGAA	1	0	0	0	0	0	3	24	N
Fvb2:2871391-2871624	TE_homo_16632	Fvb2	2871391	2871624	234	167	103	0.281	.	CCGACGAAUGUAGUAUUUAAAUAU	9	6	4	12	3	23	119	24	N
Fvb2:2917826-2918008	TE_struc_409	Fvb2	2917826	2918008	183	3	3	0.333	.	AUAUGUGGUUAUUGCUCAAAA	1	0	0	1	0	0	2	24	N
Fvb2:2918755-2918933	TE_homo_16663	Fvb2	2918755	2918933	179	1380	337	0.597	.	AUUUACAUCCAAGGUGAUUGAUCA	103	107	18	41	25	181	1008	24	N
Fvb2:2938407-2938531	TE_homo_16669	Fvb2	2938407	2938531	125	44	18	0.977	+	AUGUCAGUGAGGUUUGAACUCAUG	14	2	0	3	0	3	36	24	N
Fvb2:2958473-2958764	TE_homo_16673	Fvb2	2958473	2958764	292	106	32	0.962	+	AGAGAACAAGGACUGAAGUGAAGU	38	1	1	2	2	14	86	24	N
Fvb2:2964471-2964660	TE_homo_16677	Fvb2	2964471	2964660	190	253	89	0.545	.	CCGGUACCCUAACUUUUGUGGCAC	47	1	3	3	1	32	213	24	N
Fvb2:3034289-3034395	TE_homo_16696	Fvb2	3034289	3034395	107	58	31	0.259	.	GAUCGAAGAGUUCGUCAAAUGACU	9	0	0	3	2	7	46	24	N
Fvb2:3062106-3062434	TE_homo_16703	Fvb2	3062106	3062434	329	79	48	0.43	.	AAAUGUUAGUGUCUUCUUCAGACU	5	2	0	0	0	6	71	24	N
Fvb2:3074945-3075027	TE_homo_16708	Fvb2	3074945	3075027	83	48	22	0.458	.	AGGAAACUUGUAGAUACGAUGUAU	10	0	0	1	0	5	42	24	N
Fvb2:3077036-3077216	TE_homo_16712	Fvb2	3077036	3077216	181	13	10	0.538	.	CUUAACGAUCAUCAAAUUUUCUGA	4	0	0	1	0	2	10	24	N
Fvb2:3077208-3077441	TE_homo_16713	Fvb2	3077208	3077441	234	68	30	0.559	.	AUCUAAUGGUGUGGACCUAUCCCU	17	1	1	1	1	8	56	24	N
Fvb2:3119006-3119109	TE_homo_16731	Fvb2	3119006	3119109	104	330	107	0.558	.	CCUUUUUUGAAUGGAUCCGGCUCC	43	15	4	14	9	35	253	24	N
Fvb2:3143381-3143804	TE_homo_16741	Fvb2	3143381	3143804	424	908	289	0.605	.	AACGGAAUAUGAGAAUUUGGGCAC	92	26	14	35	24	150	659	24	N
Fvb2:3159112-3159417	TE_homo_16754	Fvb2	3159112	3159417	306	401	177	0.666	.	AUUCGACGGACUUGUAGGGGACGU	54	35	2	58	24	44	238	24	N
Fvb2:3159176-3159454	TE_homo_16755	Fvb2	3159176	3159454	279	369	166	0.642	.	AUUCGACGGACUUGUAGGGGACGU	54	32	2	57	18	39	221	24	N
Fvb2:3167784-3167980	TE_homo_16761	Fvb2	3167784	3167980	197	175	62	0.651	.	CGUGACAGUAUGACGUGAUCCUAC	20	4	1	9	3	17	141	24	N
Fvb2:3176808-3176983	TE_homo_16762	Fvb2	3176808	3176983	176	40	23	0.775	.	GAUAUUUGAUUGGAAUGUAGGGCC	5	0	0	0	1	1	38	24	N
Fvb2:3198091-3198267	TE_homo_16768	Fvb2	3198091	3198267	177	6	6	0.5	.	UUAGCAUCCAUCAUUCGUUCGAU	1	0	0	0	0	1	5	24	N
Fvb2:3200827-3200979	TE_homo_16775	Fvb2	3200827	3200979	153	102	43	0.716	.	CAUAUGUCAGUAAGGUUUGAACU	21	2	1	4	5	29	61	24	N
Fvb2:3203999-3204371	TE_homo_16782	Fvb2	3203999	3204371	373	192	115	0.479	.	GAUUUGGACAGAAUAUAGGACAUU	8	2	3	6	6	33	142	24	N
Fvb2:3228044-3228490	TE_homo_16793	Fvb2	3228044	3228490	447	17	12	0.294	.	GAACGGUCCAGCUUAUGUCAAACU	4	0	1	0	3	1	12	24	N
Fvb2:3228510-3228952	TE_homo_16796	Fvb2	3228510	3228952	443	53	25	0.509	.	ACUAAAUAUAACUUUUGAAAGCCU	15	0	0	2	1	8	42	24	N
Fvb2:3229375-3229735	TE_homo_16801	Fvb2	3229375	3229735	361	225	101	0.689	.	CCGGACUAUGUAUAUAUAUAUACG	23	13	0	5	16	29	162	24	N
Fvb2:3229639-3230021	TE_homo_16802	Fvb2	3229639	3230021	383	447	168	0.817	+	AAACUGGAAUUCGACGGACUC	61	34	4	134	25	35	215	24	N
Fvb2:3230662-3230862	TE_homo_16808	Fvb2	3230662	3230862	201	318	133	0.783	.	CGGAGUGCGGACGUCCGCUUC	74	30	7	92	13	23	153	24	N
Fvb2:3230792-3231093	TE_homo_16809	Fvb2	3230792	3231093	302	388	150	0.624	.	CGGAGUGCGGACGUCCGCUUC	74	31	6	98	14	24	215	24	N
Fvb2:3254237-3254668	TE_homo_16833	Fvb2	3254237	3254668	432	113	55	0.416	.	UACGGAAACUCUUCUAGUGAGGA	12	2	0	1	2	17	91	24	N
Fvb2:3316027-3316178	TE_homo_16847	Fvb2	3316027	3316178	152	10	7	0.4	.	AGAAUACUAAUAAAGUAUGAGGGA	3	0	0	0	0	1	9	24	N
Fvb2:3317408-3317505	TE_homo_16851	Fvb2	3317408	3317505	98	14	12	0.286	.	GGAUAUAAGAUCGAAAAAUGGGAU	2	2	0	0	1	1	10	24	N
Fvb2:3335487-3335903	TE_struc_414	Fvb2	3335487	3335903	417	413	159	0.659	.	AGGAAACUGUUAGAGAUGCUCUUA	28	4	14	7	7	69	312	24	N
Fvb2:3368373-3368474	TE_homo_16879	Fvb2	3368373	3368474	102	10	8	0.2	.	AGAUUAUAUCAUACUGCCACGUGG	3	0	0	0	0	0	10	24	N
Fvb2:3371089-3371286	TE_homo_16882	Fvb2	3371089	3371286	198	105	59	0.476	.	ACUGUCAUGUGGUCCUCCUGUAGC	9	0	3	4	1	18	79	24	N
Fvb2:3374276-3375021	TE_homo_16883	Fvb2	3374276	3375021	746	28	23	0.464	.	AACGGAUAGAUCAGUUUAAAAAAC	3	0	0	1	0	2	25	24	N
Fvb2:3376108-3376686	TE_homo_16885	Fvb2	3376108	3376686	579	77	40	0.727	.	AUUGAUCGUGAGAGGUUAAGGCCC	19	3	1	2	0	3	68	24	N
Fvb2:3392827-3393293	TE_homo_16896	Fvb2	3392827	3393293	467	164	63	0.787	.	ACCGAAGCCGUUGGAACUGACAAA	25	3	1	4	6	14	136	24	N
Fvb2:3442955-3443239	TE_homo_16919	Fvb2	3442955	3443239	285	727	298	0.631	.	GUCUGUCGAAUUCAAGUUUUUCGG	33	74	7	89	37	75	445	24	N
Fvb2:3443816-3444007	TE_homo_16920	Fvb2	3443816	3444007	192	878	161	0.351	.	ACCACGUCAUACUGUCAUGUGAUC	293	23	7	10	15	123	700	24	N
Fvb2:3443899-3444027	TE_homo_16921	Fvb2	3443899	3444027	129	70	34	0.443	.	UCUAAACUCUAGACCCUAAACCCU	9	0	0	0	2	10	58	24	N
Fvb2:3446863-3447047	TE_homo_16923	Fvb2	3446863	3447047	185	161	49	0.248	.	AGUGCUCGGGAGGACCACGUGGUA	69	1	0	0	1	16	143	24	N
Fvb2:3450251-3450447	TE_homo_16924	Fvb2	3450251	3450447	197	46	31	0.478	.	AAUUUUGUCUCUAUUCUCUAGUGA	5	1	1	1	1	5	37	24	N
Fvb2:3470191-3470876	TE_homo_16929	Fvb2	3470191	3470876	686	35	26	0.429	.	AUGAGUAUAAUGACGCAGAAGAUG	5	1	0	0	0	5	29	24	N
Fvb2:3480194-3480574	TE_homo_16932	Fvb2	3480194	3480574	381	43	23	0.349	.	GAGAACAAGGACUGAAAUGAAAAU	10	0	0	2	0	3	38	24	N
Fvb2:3497957-3498097	TE_homo_16941	Fvb2	3497957	3498097	141	13	11	0.769	.	AGGAAAGUAGUUCACCAGGGUUAG	2	0	1	0	0	1	11	24	N
Fvb2:3498274-3498559	TE_homo_16943	Fvb2	3498274	3498559	286	21	17	0.619	.	UCCACAAAGAUCUAAUCGGCAAUG	3	0	0	0	1	6	14	24	N
Fvb2:3499110-3499237	TE_homo_16944	Fvb2	3499110	3499237	128	50	33	0.22	.	GAAGAAAAAUUGAUUUGUCGGCCU	8	4	1	3	3	9	30	24	N
Fvb2:3540509-3540781	TE_homo_16959	Fvb2	3540509	3540781	273	141	62	0.688	.	CUGGAAUUCGGCGGACUUGCC	19	5	2	30	20	7	77	24	N
Fvb2:3551874-3551969	TE_homo_16976	Fvb2	3551874	3551969	96	24	12	0.5	.	CACGGACACUCCACAUGGGCGGAG	5	3	0	0	2	0	19	24	N
Fvb2:3583764-3584031	TE_homo_17008	Fvb2	3583764	3584031	268	46	25	0.63	.	ACAAAGAGGAUGAGAAGCGGACGU	9	2	0	4	6	3	31	24	N
Fvb2:3584506-3584831	TE_struc_418	Fvb2	3584506	3584831	326	46	36	0.457	.	AGUGGAGGCCCGCUGUCGUCGGCG	3	4	0	4	0	3	35	24	N
Fvb2:3601751-3601914	TE_homo_17037	Fvb2	3601751	3601914	164	13	10	0.769	.	AAUAUGGAAUGCAAUUGUGACAAU	2	0	0	0	0	0	13	24	N
Fvb2:3601915-3602240	TE_homo_17038	Fvb2	3601915	3602240	326	93	55	0.667	.	AUCCCGAUCUCGUACUGAAAGUUA	12	1	1	5	3	10	73	24	N
Fvb2:3603182-3603547	TE_homo_17040	Fvb2	3603182	3603547	366	9	8	0.556	.	AAGAAAACUCUUAACAACAAAACC	2	0	0	0	0	1	8	24	N
Fvb2:3603552-3603760	TE_homo_17041	Fvb2	3603552	3603760	209	223	100	0.543	.	AUGUCUGGACGACCUGAUCCCGUC	27	10	1	7	6	24	175	24	N
Fvb2:3603764-3603873	TE_homo_17042	Fvb2	3603764	3603873	110	23	22	0.261	.	AGACUUUAAUUCCUAAACCCAUCU	2	0	0	0	1	7	15	24	N
Fvb2:3604371-3604459	TE_homo_17046	Fvb2	3604371	3604459	89	35	23	0.771	.	AUUUGAUUGGAAUGUAGGACCACA	5	4	0	0	0	3	28	24	N
Fvb2:3605899-3606089	TE_homo_17051	Fvb2	3605899	3606089	191	42	25	0.429	.	CCACAAGUGAUGAUCUCUAGGCCU	6	0	0	2	0	6	34	24	N
Fvb2:3626420-3626756	TE_homo_17063	Fvb2	3626420	3626756	337	28	19	0.571	.	AAUUCGUUGGGCUAUAUGAGUAGA	5	0	1	1	1	9	16	24	N
Fvb2:3638976-3639061	TE_homo_17077	Fvb2	3638976	3639061	86	47	29	0.404	.	AUAACUAAGAUCCGUCCCUGAUAU	5	5	1	3	0	5	33	24	N
Fvb2:3692758-3693169	TE_homo_17105	Fvb2	3692758	3693169	412	997	354	0.372	.	GAGAAUCUUUAAGCUGAAGACUAG	41	21	11	31	15	136	783	24	N
Fvb2:3745707-3745833	TE_homo_17124	Fvb2	3745707	3745833	127	12	10	0.583	.	UGUGUGAAUUUCAAUUUAGGAUGU	2	0	0	0	0	4	8	24	N
Fvb2:3761185-3761450	TE_homo_17138	Fvb2	3761185	3761450	266	92	59	0.598	.	AUUGGAAAGACAAAUGAGUUACUU	8	1	1	0	5	18	67	24	N
Fvb2:3774970-3775320	TE_homo_17141	Fvb2	3774970	3775320	351	6	6	0	-	UGAAUUUAGGUAACGCUCUAAAGA	1	0	0	1	1	0	4	24	N
Fvb2:3777247-3777699	TE_homo_17143	Fvb2	3777247	3777699	453	40	29	0.425	.	AAAACCGGUGUGGGACAACUGCCU	8	1	1	3	1	3	31	24	N
Fvb2:3780308-3780409	TE_homo_17146	Fvb2	3780308	3780409	102	46	26	0.761	.	UGUAGAAACGCUGACAGGGGUCCG	5	4	0	0	3	4	35	24	N
Fvb2:3787048-3787151	TE_homo_17147	Fvb2	3787048	3787151	104	15	11	0.533	.	AAACCACAAUAGCAAACUAAGCCU	4	0	0	0	0	2	13	24	N
[truncated: 13,033 more rows]

## Sheet: Results_ShortStack_IRs
Locus	Name	Chrom	Start	End	Length	Reads	DistinctSequences	FracTop	Strand	MajorRNA	MajorRNAReads	Short	Long	21	22	23	24	DicerCall	MIRNA
contig_5:5429-5596	IR_9467	contig_5	5429	5596	168	32	18	0.281	.	AUGAAUCUCUUGGUCAAUUACUGA	8	3	2	13	0	2	12	21	N
Fvb1:554697-555395	IR_22	Fvb1	554697	555395	699	977	280	0.176	-	CGAGGCUGAAGACUAUGACGACCU	54	49	26	519	124	151	108	21	N
Fvb1:637710-638357	IR_23	Fvb1	637710	638357	648	44113	3146	0.869	+	UUGCCGGAUAUUCAACAAUUC	5168	1990	330	15765	14823	5561	5644	21	N
Fvb1:777806-778181	IR_27	Fvb1	777806	778181	376	100	25	0.91	+	ACUGGAAUUCGGCGGACUCGC	37	2	3	44	0	10	41	21	N
Fvb1:886933-887586	IR_29	Fvb1	886933	887586	654	35845	2708	0.217	.	UGGUGGCACUCUGUUCGAUGAC	1946	2570	361	17427	9945	2174	3368	21	N
Fvb1:1990268-1990813	IR_49	Fvb1	1990268	1990813	546	48523	1912	0.173	-	UGAGAAAGACCGCAAGCACUG	7435	1885	103	32666	11460	1817	592	21	N
Fvb1:2274839-2275325	IR_59	Fvb1	2274839	2275325	487	525	92	0.834	+	UAUGAAAUUUUGUAGAGGUGA	223	9	2	294	65	20	135	21	N
Fvb1:2371811-2372226	IR_63	Fvb1	2371811	2372226	416	49749	2468	0.019	-	UCCCGUCUAUCAAAUUCUGAU	1940	5381	2133	19256	6975	4717	11287	21	N
Fvb1:2396282-2396979	IR_65	Fvb1	2396282	2396979	698	34991	2733	0.242	.	CAAGACUGGAACGACACAGCU	1919	1472	73	19753	9575	2004	2114	21	N
Fvb1:2621090-2621516	IR_83	Fvb1	2621090	2621516	427	958	82	0.943	+	CUGGAAUUCGGCGGACUCGCC	482	17	5	491	31	13	401	21	N
Fvb1:2667568-2668265	IR_84	Fvb1	2667568	2668265	698	1902	599	0.129	-	UCUGUGCUGAACUUGAUGUAG	135	101	8	1075	379	175	164	21	N
Fvb1:3296556-3297211	IR_97	Fvb1	3296556	3297211	656	6	6	0.333	.	GAUACCCGAACUAAGCUCCGUCAA	1	1	0	4	0	0	1	21	N
Fvb1:7988595-7988840	IR_252	Fvb1	7988595	7988840	246	6	6	0	-	GAGCUAGAAAGUUGCCUUG	1	1	0	3	0	1	1	21	N
Fvb1:8451118-8451426	IR_277	Fvb1	8451118	8451426	309	2	2	0.5	.	UAAAAGCUGUGUAUAGUUACU	1	0	0	1	0	0	1	21	N
Fvb1:8508534-8509153	IR_284	Fvb1	8508534	8509153	620	1177	140	0.917	+	CUGGAAUUCGGCGGACUCGCC	435	41	7	616	30	35	448	21	N
Fvb1:9100374-9101072	IR_302	Fvb1	9100374	9101072	699	54888	2815	0.168	-	AUUUGAAGACAGAAGAAUUUC	3646	2833	113	34092	12467	4285	1098	21	N
Fvb1:10573851-10574213	IR_352	Fvb1	10573851	10574213	363	717	220	0.554	.	CCCGGACGACAGCACAGGCUU	178	44	1	336	65	29	242	21	N
Fvb1:10811650-10812125	IR_359	Fvb1	10811650	10812125	476	2	2	0.5	.	GGGGCUGUAUAUAUAUAUAUAUA	1	0	0	1	0	1	0	21	N
Fvb1:11955335-11955623	IR_417	Fvb1	11955335	11955623	289	1179	140	0.972	+	CUGGAAUUCGGCGGACUCGCC	532	51	11	546	68	33	470	21	N
Fvb1:12133120-12133572	IR_432	Fvb1	12133120	12133572	453	4271	643	0.836	+	UCUCCUUCCAGUACUGGCCGG	387	446	56	1995	636	216	922	21	N
Fvb1:12488104-12488423	IR_455	Fvb1	12488104	12488423	320	2	2	0	-	GUGCUCCACAUCGUUUCCGGAUA	1	0	0	1	0	1	0	21	N
Fvb1:12625233-12625638	IR_464	Fvb1	12625233	12625638	406	2348	385	0.899	+	AAUUUGGUGAUUGUUAAGGCU	343	91	24	1148	512	205	368	21	N
Fvb1:15871051-15871401	IR_628	Fvb1	15871051	15871401	351	31	13	0.194	-	CCCGGACGACAGCACAGGCUU	15	0	0	20	1	3	7	21	N
Fvb1:16729938-16730373	IR_670	Fvb1	16729938	16730373	436	198	26	0.965	+	UGAACCGGACAGAAUUCAGUC	159	6	0	167	1	3	21	21	N
Fvb1:16840048-16840384	IR_679	Fvb1	16840048	16840384	337	163	43	0.859	+	CUGGAAUUCGGCGGACUCGCC	104	3	4	110	2	10	34	21	N
Fvb1:17118988-17119398	IR_692	Fvb1	17118988	17119398	411	124	41	0.726	.	AAUAUGAUGUCACCAAACUGA	55	0	0	59	9	10	46	21	N
Fvb1:17728899-17729579	IR_728	Fvb1	17728899	17729579	681	6	4	1	+	AAAAGAACUCAAUGGCAGCCU	3	0	0	4	2	0	0	21	N
Fvb1:17799541-17799800	IR_731	Fvb1	17799541	17799800	260	119	54	0.235	.	CCGGAAAACUGGAAUUCGACG	25	12	0	50	7	9	41	21	N
Fvb1:17950945-17951642	IR_738	Fvb1	17950945	17951642	698	33	23	0.848	+	CAAGAACAAUAAGAUCAUUUU	4	1	3	14	7	3	5	21	N
Fvb1:18974715-18975143	IR_797	Fvb1	18974715	18975143	429	51	21	0.451	.	UUCCCGGACGACAGCACAGGC	11	1	1	20	4	6	19	21	N
Fvb1:19824763-19825029	IR_827	Fvb1	19824763	19825029	267	186	66	0.328	.	CCGGAAAACUGGAAUUCGACG	33	25	8	57	21	21	54	21	N
Fvb1:20009772-20010231	IR_836	Fvb1	20009772	20010231	460	1204	365	0.177	-	AAUAUGAUGUCACCAAACUGA	235	35	12	516	191	143	307	21	N
Fvb1:20072971-20073449	IR_841	Fvb1	20072971	20073449	479	178	80	0.174	-	UCACGUUGGUCCUUGCACUCU	63	12	3	92	17	13	41	21	N
Fvb1:23629870-23630260	IR_984	Fvb1	23629870	23630260	391	118	41	0.051	-	UUUUGGACUUAGAUGAUGUAG	34	15	3	75	4	3	18	21	N
Fvb1:23868659-23868884	IR_1004	Fvb1	23868659	23868884	226	303	154	0.756	.	AAGAGAAGGGCCGUCGCCGGC	72	27	1	107	33	28	107	21	N
Fvb2:337203-337631	IR_1051	Fvb2	337203	337631	429	182	76	0.368	.	CCGGCGACGGCUUCUCUCUUU	42	9	2	87	32	10	42	21	N
Fvb2:1588541-1588841	IR_1100	Fvb2	1588541	1588841	301	95	30	0.768	.	AAACUGGAAUUCGACGGACUC	43	2	0	52	4	4	33	21	N
Fvb2:1642172-1642532	IR_1107	Fvb2	1642172	1642532	361	34	29	0.235	.	AGUUGUUCGACUAGCUAGUAGAGA	3	4	2	9	8	3	8	21	N
Fvb2:1642585-1643283	IR_1108	Fvb2	1642585	1643283	699	224	90	0.683	.	CUUGUCAGACUAGCUAGUAGA	27	26	4	83	31	17	63	21	N
Fvb2:1643292-1643932	IR_1109	Fvb2	1643292	1643932	641	378	133	0.228	.	UCAGACUAGCUAGUAGAGAGA	51	10	4	136	70	35	123	21	N
Fvb2:1989952-1990350	IR_1122	Fvb2	1989952	1990350	399	421	137	0.24	.	UCUGCACUCCGGCUUAAAGUG	204	10	1	230	2	22	156	21	N
Fvb2:2016192-2016832	IR_1125	Fvb2	2016192	2016832	641	11046	1288	0.794	.	CCCUAGGGUUUGGAGCCGCCU	803	675	336	5895	2592	937	611	21	N
Fvb2:3730554-3730904	IR_1202	Fvb2	3730554	3730904	351	555	147	0.175	-	AAACUGGAAAAUAAUGGACUC	215	74	5	285	27	31	133	21	N
Fvb2:5537410-5537800	IR_1293	Fvb2	5537410	5537800	391	302	89	0.722	.	CCCGGACAACAGCACAGGCUU	98	7	1	166	34	15	79	21	N
Fvb2:5539303-5539728	IR_1297	Fvb2	5539303	5539728	426	79	15	0.253	.	UCUAGAUCAUCUUGUGUAGAU	54	0	0	54	0	4	21	21	N
Fvb2:5781071-5781380	IR_1307	Fvb2	5781071	5781380	310	94	38	0.67	.	AAACUGGAAUUCGACGGACUC	33	5	0	45	8	1	35	21	N
Fvb2:6253254-6253408	IR_1329	Fvb2	6253254	6253408	155	2	2	0	-	UGACUAUAGCCGACGACUUAUACC	1	0	0	1	0	0	1	21	N
Fvb2:6263386-6263605	IR_1331	Fvb2	6263386	6263605	220	2	2	0	-	UUAGCCGACGACUUUAAACUUUCU	1	0	0	1	0	0	1	21	N
Fvb2:7163623-7164088	IR_1364	Fvb2	7163623	7164088	466	572	178	0.71	.	UUAACGAUCACCAAAUUGGCU	203	15	5	247	19	49	237	21	N
Fvb2:7428021-7428349	IR_1379	Fvb2	7428021	7428349	329	60	26	0.65	.	CUUGUGUAGAUCAUCUCUGCA	20	1	1	24	7	7	20	21	N
Fvb2:10210498-10211098	IR_1501	Fvb2	10210498	10211098	601	16	9	0.938	+	CGUUACCCAAUAUAGUAGGUC	5	0	1	8	2	0	5	21	N
Fvb2:10841421-10841835	IR_1526	Fvb2	10841421	10841835	415	82	27	0.146	-	CCCGGACGACAGCACAGGCUU	50	4	1	60	3	3	11	21	N
Fvb2:10958275-10958441	IR_1539	Fvb2	10958275	10958441	167	2	2	0.5	.	CAUGUAUACUUAGCUUGGUGA	1	0	0	1	0	0	1	21	N
Fvb2:11040989-11041181	IR_1550	Fvb2	11040989	11041181	193	118	57	0.627	.	UUAAAAUGAUUGAUACUGGAU	21	4	2	81	9	5	17	21	N
Fvb2:11051632-11052081	IR_1552	Fvb2	11051632	11052081	450	426	86	0.228	.	UCUAGAUCAUCUUGUGUAGAU	179	5	3	221	45	47	105	21	N
Fvb2:12231729-12232188	IR_1638	Fvb2	12231729	12232188	460	67	22	0.239	.	UCUAGAUCAUCUUGUGUAGAU	36	2	1	37	0	2	25	21	N
Fvb2:13211223-13211623	IR_1714	Fvb2	13211223	13211623	401	421	136	0.639	.	CCGGACGACAGCACAGGCUUC	73	63	1	208	50	40	59	21	N
Fvb2:14124839-14125025	IR_1759	Fvb2	14124839	14125025	187	50	16	0.86	+	AAACUGGAAAAUAAUGGACUC	18	2	0	20	12	1	15	21	N
Fvb2:14981465-14981619	IR_1805	Fvb2	14981465	14981619	155	2	2	0.5	.	GACUUUAGCCGACGACAUUGU	1	0	0	1	1	0	0	21	N
Fvb2:17042365-17042589	IR_1925	Fvb2	17042365	17042589	225	2	2	0	-	GCCAUAUGACUUGGAUGCUCUCU	1	0	0	1	0	1	0	21	N
Fvb2:17435460-17435876	IR_1931	Fvb2	17435460	17435876	417	128	56	0.672	.	ACUGGAAUUCGGCGGACUCGC	19	2	1	48	20	11	46	21	N
Fvb2:17461545-17461980	IR_1932	Fvb2	17461545	17461980	436	526	199	0.447	.	GGAGAGAAGCCGUCGUCGGCG	42	70	7	181	58	54	156	21	N
Fvb2:17466160-17466651	IR_1941	Fvb2	17466160	17466651	492	216	65	0.713	.	UGAACCGGACAGAAUUCAGUC	107	7	1	121	8	8	71	21	N
Fvb2:17537340-17538037	IR_1945	Fvb2	17537340	17538037	698	14	13	0.286	.	UAACUCGAACUAACCUCUGUUA	2	2	0	4	4	1	3	21	N
Fvb2:18406123-18406312	IR_1980	Fvb2	18406123	18406312	190	42	25	0.143	-	UUGAACUGAAUCUGAUGCAUC	7	1	0	20	6	3	12	21	N
Fvb2:19192369-19192861	IR_2023	Fvb2	19192369	19192861	493	32	9	0.938	+	CUAGAUACUAGACGGUGGAGA	20	0	0	20	0	2	10	21	N
Fvb2:23003672-23004011	IR_2132	Fvb2	23003672	23004011	340	143	53	0.776	.	AAAACUGGAAUUCGACGGACU	49	8	1	68	5	7	54	21	N
Fvb2:23194018-23194446	IR_2149	Fvb2	23194018	23194446	429	959	197	0.854	+	AGAGAAACCGUCUUGGAAGCCUGU	97	32	10	380	173	67	297	21	N
Fvb2:23344927-23345319	IR_2152	Fvb2	23344927	23345319	393	11	11	0.455	.	CGGCGCCGGAGGGUGGAGAAC	1	1	1	5	0	0	4	21	N
Fvb2:23346484-23346892	IR_2154	Fvb2	23346484	23346892	409	2	2	0	-	GGAGGGUGGAGACGGACGGAC	1	0	0	1	0	0	1	21	N
Fvb2:23459651-23460089	IR_2163	Fvb2	23459651	23460089	439	2682	331	0.798	.	CCAGAGUACGGACGUCCGCUC	1286	194	15	1903	154	80	336	21	N
Fvb2:24328253-24328544	IR_2192	Fvb2	24328253	24328544	292	5	3	0.4	.	UUAGACGUGGAACAAAUCUUC	2	0	0	3	0	0	2	21	N
Fvb2:26540117-26540350	IR_2264	Fvb2	26540117	26540350	234	214	68	0.855	+	AUCUAGAUCAUCUUGUGUAGA	98	10	4	112	8	12	68	21	N
Fvb2:26710608-26711006	IR_2276	Fvb2	26710608	26711006	399	351	57	0.137	-	UCUGCACUCCGGCUUAAAGUG	261	5	0	267	4	19	56	21	N
Fvb2:26794766-26795163	IR_2280	Fvb2	26794766	26795163	398	115	50	0.922	+	UUCGCCGGAGGAGAACACAGC	28	8	1	65	25	3	13	21	N
Fvb2:29003018-29003399	IR_2329	Fvb2	29003018	29003399	382	1973	476	0.422	.	UCGGGGAAGCUACUGGAGUCC	386	259	23	946	80	179	486	21	N
Fvb2:29072509-29073206	IR_2333	Fvb2	29072509	29073206	698	12826	1346	0.206	.	UAUGGUGGAGGUAGUUUUUCU	1881	860	101	9329	1978	332	226	21	N
Fvb2:29242376-29243073	IR_2341	Fvb2	29242376	29243073	698	2271	722	0.259	.	UUUGGUGCUUGUCAAUCUGGG	248	182	18	964	595	196	316	21	N
Fvb3:1443892-1444590	IR_2385	Fvb3	1443892	1444590	699	3	3	1	+	AGACAAAGACGAAGACGGCAC	1	0	0	1	1	1	0	21	N
Fvb3:1661948-1662155	IR_2388	Fvb3	1661948	1662155	208	7	7	0.714	.	UUGGACUAGUGGAAAACCGAGUA	1	0	0	2	1	2	2	21	N
Fvb3:2695701-2696398	IR_2416	Fvb3	2695701	2696398	698	2297	693	0.744	.	CCCGAGGAAGUAGGAGGCACU	197	167	66	1073	618	233	140	21	N
Fvb3:3224212-3224565	IR_2434	Fvb3	3224212	3224565	354	1290	401	0.32	.	UCCGUCCGUUGUCCACCCUUUGGC	118	161	13	457	132	94	433	21	N
Fvb3:3234967-3235363	IR_2435	Fvb3	3234967	3235363	397	8	7	0.125	-	UGAACGGUUAAGAUUGGAAAU	2	0	1	2	1	2	2	21	N
Fvb3:5741067-5741765	IR_2543	Fvb3	5741067	5741765	699	7	6	0.429	.	AGAAAGUAUCUGAAAAUCGGA	2	1	0	5	0	0	1	21	N
Fvb3:7386829-7387223	IR_2604	Fvb3	7386829	7387223	395	45	25	0.467	.	CUUAUACAAAGGCAUGAACUU	8	0	0	31	6	0	8	21	N
Fvb3:7839258-7839955	IR_2616	Fvb3	7839258	7839955	698	3329	954	0.744	.	CCGGAAACAAAUUUGGUACCC	256	136	17	1660	1011	248	257	21	N
Fvb3:8027458-8027872	IR_2632	Fvb3	8027458	8027872	415	10	5	1	+	UUUUGAAAGUUUAGGUAUGAA	4	0	0	5	0	0	5	21	N
Fvb3:8140785-8141482	IR_2633	Fvb3	8140785	8141482	698	48	23	0.812	+	AGUAAGAACGAAGGACGAGAA	22	3	2	33	4	2	4	21	N
Fvb3:8557383-8557537	IR_2652	Fvb3	8557383	8557537	155	1	1	1	+	CGACGAAAUAAUGUCGUCGGC	1	0	0	1	0	0	0	21	N
Fvb3:10610216-10610656	IR_2763	Fvb3	10610216	10610656	441	25	13	0.72	.	CUUGUGUAGAUCAUCUCUGCA	10	0	1	11	4	1	8	21	N
Fvb3:11040589-11041208	IR_2778	Fvb3	11040589	11041208	620	541	110	0.839	+	AACUUUUGAAAGUCUUAACGA	294	15	1	328	6	18	173	21	N
Fvb3:12492422-12492751	IR_2845	Fvb3	12492422	12492751	330	14	6	0.786	.	CACAAUAUUAUCUAGAUACUA	9	0	0	9	0	1	4	21	N
Fvb3:13043298-13043995	IR_2874	Fvb3	13043298	13043995	698	9	9	0.333	.	AGAAGAUUUGGUCGGCGGCUU	1	1	0	5	0	0	3	21	N
Fvb3:13313713-13314028	IR_2889	Fvb3	13313713	13314028	316	7	5	0.429	.	UGAACCGGACAGAAUACAGGC	3	0	0	4	1	1	1	21	N
Fvb3:14210837-14211242	IR_2938	Fvb3	14210837	14211242	406	29	16	0.034	-	UUGUUGGUUCUUUUAUCAAUG	10	4	0	21	3	1	0	21	N
Fvb3:16432334-16432636	IR_3022	Fvb3	16432334	16432636	303	3	2	0	-	ACAUUUAUAUACAUGAACGGU	2	0	0	3	0	0	0	21	N
Fvb3:17455394-17456092	IR_3075	Fvb3	17455394	17456092	699	5	5	0.6	.	GAUGAGAGUUGCAGAGAGAGAUG	1	1	0	2	0	1	1	21	N
Fvb3:17788059-17788691	IR_3099	Fvb3	17788059	17788691	633	1118	232	0.831	+	AAACUGGAAUUCGACGGACUC	224	33	5	426	135	158	361	21	N
Fvb3:18011628-18012037	IR_3112	Fvb3	18011628	18012037	410	1544	422	0.056	-	UUCGUAAGAAAGUGAACCGGU	96	120	19	913	321	121	50	21	N
Fvb3:18077248-18077748	IR_3114	Fvb3	18077248	18077748	501	56	18	0.036	-	AAUUUUUGAAAGUCUUAACGA	21	2	0	21	2	17	14	21	N
Fvb3:19503619-19504060	IR_3194	Fvb3	19503619	19504060	442	96	46	0.479	.	AAAUUGGCUGAAAUUUUGCAG	30	4	2	40	8	9	33	21	N
Fvb3:20207485-20207804	IR_3235	Fvb3	20207485	20207804	320	75	12	0.96	+	AACGAUCACCAAAUUGGCUGA	38	4	0	55	0	3	13	21	N
Fvb3:20333131-20333441	IR_3242	Fvb3	20333131	20333441	311	4	4	1	+	ACAAACUACCCAAUCUACCCC	1	0	0	4	0	0	0	21	N
Fvb3:20697795-20698178	IR_3249	Fvb3	20697795	20698178	384	420	149	0.605	.	ACUGGAAUUCGGCGGACUCGC	111	28	14	168	33	42	135	21	N
Fvb3:21136399-21137096	IR_3288	Fvb3	21136399	21137096	698	25	14	0.08	-	AAAGGGAGGACACAUGGCAUA	10	1	0	19	3	1	1	21	N
Fvb3:23355348-23355624	IR_3439	Fvb3	23355348	23355624	277	2	2	1	+	GCUUCCGUGCUUCCUAGGUCA	1	0	0	1	0	1	0	21	N
Fvb3:24007976-24008350	IR_3470	Fvb3	24007976	24008350	375	185	42	0.222	.	CCCGGACGACAGCACAGGCUU	77	5	0	110	9	5	56	21	N
Fvb3:24150217-24150655	IR_3479	Fvb3	24150217	24150655	439	1028	132	0.906	+	UGAACCGGACAGAAUUCAGUC	640	23	13	674	31	27	260	21	N
Fvb3:24278672-24279337	IR_3489	Fvb3	24278672	24279337	666	321	56	0.907	+	AAACUGGAAUUCGACGGACUC	107	0	0	152	17	17	135	21	N
Fvb3:24279067-24279657	IR_3490	Fvb3	24279067	24279657	591	193	38	0.912	+	AAACUGGAAUUCGACGGACUC	107	0	1	145	7	3	37	21	N
Fvb3:24609436-24609835	IR_3503	Fvb3	24609436	24609835	400	241	81	0.846	+	AAAACUGGAAUUCGACGGACU	65	18	2	123	8	11	79	21	N
Fvb3:26507897-26508190	IR_3556	Fvb3	26507897	26508190	294	17	13	0.118	-	UUGAAAGUGUAGGGACUAACA	3	2	0	7	0	2	6	21	N
Fvb3:28171406-28172080	IR_3608	Fvb3	28171406	28172080	675	566	193	0.982	+	UACUCGUCGUCGGAUCCCACC	213	93	14	387	24	14	34	21	N
Fvb3:28333606-28334078	IR_3613	Fvb3	28333606	28334078	473	43	20	0.791	.	CUAGAUCAUCUUGUGUAGAUC	13	2	1	20	0	2	18	21	N
Fvb3:28561955-28562365	IR_3626	Fvb3	28561955	28562365	411	83	63	0.47	.	CAGGUAUCAGUAGAAAAACUAC	4	6	3	32	8	5	29	21	N
Fvb3:29592536-29592958	IR_3662	Fvb3	29592536	29592958	423	81	31	0.185	-	UCUAGAUCAUCUUGUGUAGAU	36	2	0	41	2	5	31	21	N
Fvb3:31073846-31074407	IR_3766	Fvb3	31073846	31074407	562	61	34	0.951	+	UUUGGAGGACGUCUAGCAGGC	8	2	0	38	14	5	2	21	N
Fvb3:31346237-31346935	IR_3777	Fvb3	31346237	31346935	699	52	37	0.25	.	AGAGCCGGAGAGGACCUGGGU	11	5	0	23	12	8	4	21	N
Fvb3:31778398-31778896	IR_3804	Fvb3	31778398	31778896	499	131	58	0.481	.	CCCGGACGACAGCACAGGCUU	15	7	1	59	3	7	54	21	N
Fvb3:32660227-32660671	IR_3843	Fvb3	32660227	32660671	445	297	73	0.209	.	UCUGCACUCCGGCUUAAAGUG	192	4	0	211	9	23	50	21	N
Fvb3:33130700-33131103	IR_3865	Fvb3	33130700	33131103	404	593	158	0.749	.	CUGGAAUUCGGCGGACUCGCC	259	61	21	280	75	28	128	21	N
Fvb3:33536364-33536805	IR_3883	Fvb3	33536364	33536805	442	227	75	0.753	.	CAAUUUGGUGAUCGUUAAGGC	87	7	0	96	14	14	96	21	N
Fvb3:34135276-34135973	IR_3913	Fvb3	34135276	34135973	698	8527	1328	0.6	.	CCUUCUGAACAAAGGCUGCCU	525	582	6	5099	2142	325	373	21	N
Fvb3:34216252-34216928	IR_3920	Fvb3	34216252	34216928	677	206	82	0.937	+	UUCAUUAAAAAUCGAACGGCC	45	23	7	135	24	11	6	21	N
Fvb3:34286613-34287310	IR_3923	Fvb3	34286613	34287310	698	25790	2218	0.847	+	UAUCUGGAUCUGCAUCGAGCU	1746	942	102	15011	5638	1837	2260	21	N
Fvb3:34432879-34433265	IR_3933	Fvb3	34432879	34433265	387	20	13	0.75	.	CUUAACGAUCACCAAAUUGGC	7	1	3	8	1	0	7	21	N
Fvb3:34813460-34813660	IR_3963	Fvb3	34813460	34813660	201	1	1	0	-	AUUUCGUCGGCUAAAGAAAGU	1	0	0	1	0	0	0	21	N
Fvb4:292237-292484	IR_4095	Fvb4	292237	292484	248	108	74	0.565	.	AAAAAACGGACUCGCCGGGGA	11	12	1	39	7	12	37	21	N
Fvb4:1319701-1320398	IR_4148	Fvb4	1319701	1320398	698	327	106	0.083	-	UGGUUAUCUAGUGUGAACUCA	124	18	5	206	28	20	50	21	N
Fvb4:2095856-2096262	IR_4160	Fvb4	2095856	2096262	407	195	41	0.272	.	CCAGAGUACGGACGUCCGCUC	109	7	0	145	3	3	37	21	N
Fvb4:2108488-2108924	IR_4163	Fvb4	2108488	2108924	437	187	70	0.701	.	AAUAUGAUGUCACCAAACUGA	79	5	0	90	17	16	59	21	N
Fvb4:2814648-2815345	IR_4223	Fvb4	2814648	2815345	698	5795	1247	0.328	.	UAGAAAGAGACCUGUAAAGCU	176	464	22	2634	1370	373	932	21	N
Fvb4:4140976-4141237	IR_4295	Fvb4	4140976	4141237	262	1783	366	0.891	+	CAGACAAGAUCGAUCUCGCCU	626	74	8	1287	141	62	211	21	N
Fvb4:4296948-4297321	IR_4302	Fvb4	4296948	4297321	374	295	87	0.546	.	AAACUGGAAUUCGACGGACUC	70	5	1	145	29	20	95	21	N
Fvb4:4350834-4351280	IR_4305	Fvb4	4350834	4351280	447	46	10	0.935	+	AUCUAGAUCAUCUUGUGUAGA	33	1	1	35	0	4	5	21	N
Fvb4:4530498-4530904	IR_4311	Fvb4	4530498	4530904	407	543	175	0.344	.	UCUGCACUCCGGCUUAAAGUG	149	56	2	268	33	30	154	21	N
Fvb4:4938447-4938890	IR_4330	Fvb4	4938447	4938890	444	3	3	1	+	GACCGCGGCGGAUUCAUUGGCAUU	1	0	0	1	0	1	1	21	N
Fvb4:5618219-5618681	IR_4366	Fvb4	5618219	5618681	463	16	8	0.875	+	UGAGGAAAUUCGAUCGGGAAG	5	0	0	8	1	1	6	21	N
Fvb4:7590727-7591140	IR_4450	Fvb4	7590727	7591140	414	51	19	0.275	.	CACUAUAAGGUAGUGCGGACC	25	2	1	29	3	1	15	21	N
Fvb4:13673849-13674156	IR_4611	Fvb4	13673849	13674156	308	1	1	0	-	UGACGCCCAGUAGAAGUUUAC	1	0	0	1	0	0	0	21	N
Fvb4:14932101-14932522	IR_4647	Fvb4	14932101	14932522	422	969	220	0.904	+	GGAGAGAAGCCGUCGUGGAAG	119	29	8	533	120	101	178	21	N
Fvb4:17651261-17651721	IR_4771	Fvb4	17651261	17651721	461	126	47	0.802	+	UGAUUUGAUGAUCGUUAAGGC	37	2	1	63	8	9	43	21	N
Fvb4:17739477-17739922	IR_4775	Fvb4	17739477	17739922	446	172	28	0.483	.	UAUGAAAUUUUGUAGAGGUGA	66	1	0	69	58	9	35	21	N
Fvb4:17818097-17818529	IR_4780	Fvb4	17818097	17818529	433	141	46	0.468	.	CCCGGACGACAGCACAGGCUU	49	1	0	79	5	10	46	21	N
Fvb4:19109866-19110322	IR_4846	Fvb4	19109866	19110322	457	5656	778	0.6	.	AGAGAAGUCAUCGUCGGCAUGAGA	1045	322	15	2358	486	267	2208	21	N
Fvb4:20334187-20334561	IR_4896	Fvb4	20334187	20334561	375	325	115	0.708	.	UUCCCGGACGACAGCACAGGC	44	24	1	137	51	9	103	21	N
Fvb4:23376639-23377026	IR_5056	Fvb4	23376639	23377026	388	373	111	0.796	.	UCUGCACUCCGGCUUAAAGUG	198	29	1	213	8	16	106	21	N
Fvb4:23377568-23378265	IR_5058	Fvb4	23377568	23378265	698	9	9	0.444	.	ACGUGUAAGCUAAUCAAUGGACA	1	1	0	3	1	1	3	21	N
Fvb4:23627071-23627469	IR_5078	Fvb4	23627071	23627469	399	630	198	0.308	.	CCGGAAAACUGGAAUUCGACG	98	57	6	241	60	38	228	21	N
Fvb4:24585960-24586352	IR_5127	Fvb4	24585960	24586352	393	326	36	0.218	.	CCCGGACGACAGCACAGGCUU	220	11	0	243	7	11	54	21	N
Fvb4:26802367-26802797	IR_5211	Fvb4	26802367	26802797	431	50	31	0.54	.	UUCCCGGACGACAGCACAGGC	8	1	0	19	4	8	18	21	N
Fvb4:30602678-30603082	IR_5353	Fvb4	30602678	30603082	405	2423	540	0.874	+	CCCGGACGACAGCACAGGCUU	254	188	12	1087	248	187	701	21	N
Fvb4:30783581-30783963	IR_5359	Fvb4	30783581	30783963	383	16	13	1	+	AAAGUGACUUGUAUUACAUGGUGU	3	0	0	7	3	0	6	21	N
Fvb4:30865704-30866257	IR_5360	Fvb4	30865704	30866257	554	7845	1224	0.117	-	UUUUGAACUUGUAGUUAAACU	326	832	138	3474	1552	518	1331	21	N
Fvb4:30869675-30870065	IR_5361	Fvb4	30869675	30870065	391	4901	827	0.131	-	UCCGAAACCCACUUUGAAGCU	471	633	122	2360	615	225	946	21	N
Fvb4:32339834-32340532	IR_5407	Fvb4	32339834	32340532	699	17544	2056	0.956	+	UCCGAAUGUUGAUCGACAAUGCCU	903	1022	96	7101	3480	1670	4175	21	N
Fvb4:32770413-32770653	IR_5420	Fvb4	32770413	32770653	241	19	11	1	+	UCUGGCCGGAAAACUGGAAUUCGG	5	0	0	8	2	1	8	21	N
Fvb4:33012072-33012399	IR_5428	Fvb4	33012072	33012399	328	156	71	0.538	.	CCUUAACGAUCACCAAAUUGG	23	9	3	56	30	17	41	21	N
Fvb4:33039619-33040316	IR_5430	Fvb4	33039619	33040316	698	60293	3916	0.168	-	UAAUAGAUUGUGUGAACCGGU	2208	2669	244	30797	18389	3493	4701	21	N
Fvb4:33220982-33221678	IR_5431	Fvb4	33220982	33221678	697	37777	2652	0.235	.	UAAGUGAACUAAAGAAAUGUGC	1670	1210	140	14979	13014	4250	4184	21	N
Fvb5:2244064-2244472	IR_5543	Fvb5	2244064	2244472	409	2643	476	0.104	-	UCUGCACUCCGGCUUAAAGUG	1254	125	15	1425	85	137	856	21	N
Fvb5:3204308-3204944	IR_5569	Fvb5	3204308	3204944	637	850	430	0.336	.	UGCGGCAAUUCUUUACUGGAG	26	77	17	346	228	51	131	21	N
Fvb5:3900745-3901440	IR_5604	Fvb5	3900745	3901440	696	19	14	0.053	-	UUACGGUCCAGAAGAAAGUUC	3	1	1	10	4	1	2	21	N
Fvb5:4113261-4113713	IR_5614	Fvb5	4113261	4113713	453	2	2	1	+	AGUUUGGGGGCCUUAACGAUCACC	1	0	0	1	0	0	1	21	N
Fvb5:4238420-4238702	IR_5618	Fvb5	4238420	4238702	283	86	29	0.779	.	CUGGAAUUCGGCGGACUCGCC	39	3	3	53	10	6	11	21	N
Fvb5:4533921-4534613	IR_5624	Fvb5	4533921	4534613	693	4	4	0.75	.	CCACGUCAUCGGUGCGACCAC	1	0	0	3	0	0	1	21	N
Fvb5:4734782-4735405	IR_5636	Fvb5	4734782	4735405	624	266845	5912	0.754	.	CUGGCGGAAAUUGAAGUGAAGC	52546	8862	462	163699	77835	5314	10673	21	N
Fvb5:5400533-5401170	IR_5665	Fvb5	5400533	5401170	638	72289	2787	0.499	.	UCUUGGCGUUACUGUAGCAAA	25056	5773	670	45234	7931	3298	9383	21	N
Fvb5:6018875-6019251	IR_5681	Fvb5	6018875	6019251	377	1982	374	0.806	+	UUCCAGGACAGCUUCUCUCCU	747	95	8	1156	289	143	291	21	N
Fvb5:6788635-6789332	IR_5709	Fvb5	6788635	6789332	698	8359	953	0.154	-	CAAAAGCAAGAGCUUUGGCCU	1024	437	23	5158	1810	522	409	21	N
Fvb5:6991835-6992330	IR_5718	Fvb5	6991835	6992330	496	124	76	0.613	.	UUUUGGGUAUGAUCAUAGGUA	11	11	1	60	41	8	3	21	N
Fvb5:7598086-7598525	IR_5742	Fvb5	7598086	7598525	440	64	20	0.719	.	CUAGAUACUAGACGGUGGAGA	30	0	1	33	2	4	24	21	N
Fvb5:9748546-9748977	IR_5819	Fvb5	9748546	9748977	432	911	207	0.317	.	UCUAGAUCAUCUUGUGUAGAU	287	17	7	327	203	87	270	21	N
Fvb5:9931474-9931777	IR_5826	Fvb5	9931474	9931777	304	1132	343	0.405	.	AUUGCUAUGAUCACUCUUUGG	69	105	6	671	209	64	77	21	N
Fvb5:9968250-9968609	IR_5828	Fvb5	9968250	9968609	360	26086	966	0.997	+	AGACGGAUCAGCCAUUAGCUC	8076	2582	362	19541	2379	454	768	21	N
Fvb5:11157111-11157495	IR_5883	Fvb5	11157111	11157495	385	312	71	0.215	.	AGAGAAACCGUCUUGGAAGCCUGU	43	9	2	129	74	20	78	21	N
Fvb5:11600500-11600912	IR_5907	Fvb5	11600500	11600912	413	1117	367	0.778	.	AACGGCACUGGGAACAUCAGGACU	48	45	3	562	199	48	260	21	N
Fvb5:14447255-14447711	IR_6042	Fvb5	14447255	14447711	457	16	14	0.688	.	AGAACUGGACCUUGGACGAG	3	3	0	7	2	0	4	21	N
Fvb5:14956171-14956501	IR_6057	Fvb5	14956171	14956501	331	125	42	0.912	+	UCAAAUUCCAGUUUUCCGGCG	40	7	2	76	6	3	31	21	N
Fvb5:15118502-15119199	IR_6068	Fvb5	15118502	15119199	698	51	41	0.294	.	GCGUGUAUCGAUUUUGGGUCA	4	2	0	23	7	4	15	21	N
Fvb5:15415290-15415434	IR_6075	Fvb5	15415290	15415434	145	188	56	0.287	.	ACAAAAGACUGCUUGAGCAUCAAG	22	10	1	81	37	16	43	21	N
Fvb5:16271385-16271821	IR_6118	Fvb5	16271385	16271821	437	108	39	0.833	+	AACGAUCACCAAAUUGGCUGA	38	3	0	48	4	11	42	21	N
Fvb5:17151961-17152399	IR_6164	Fvb5	17151961	17152399	439	82	18	0.366	.	CCCGGACGACAGCACAGGCUU	47	1	0	51	3	2	25	21	N
Fvb5:18146681-18147362	IR_6221	Fvb5	18146681	18147362	682	547	193	0.353	.	CCCAUUUUCUUCUUUUGAUUG	31	27	1	437	70	4	8	21	N
Fvb5:18379172-18379546	IR_6229	Fvb5	18379172	18379546	375	266	50	0.812	+	AAACUGGAAUUCGACGGACUC	156	8	3	180	10	6	59	21	N
Fvb5:18388262-18388787	IR_6232	Fvb5	18388262	18388787	526	35	28	0.371	.	UUCGAGCUUUUAGAUCUAGGC	4	3	0	22	5	2	3	21	N
Fvb5:18736226-18736821	IR_6241	Fvb5	18736226	18736821	596	51	30	0.02	-	AAUGGUCGUUUGUUAAAUGAA	8	9	1	34	3	2	2	21	N
Fvb5:19398480-19398884	IR_6278	Fvb5	19398480	19398884	405	105	36	0.876	+	CCCAAUUGAUGAAAUUCUGUU	55	4	4	57	2	9	29	21	N
Fvb5:20417190-20417787	IR_6325	Fvb5	20417190	20417787	598	148	63	0.027	-	CCACGUCAACAACUCUGCUGA	25	15	2	63	48	14	6	21	N
Fvb5:24855840-24856250	IR_6528	Fvb5	24855840	24856250	411	658	85	0.933	+	CUGGAAUUCGGCGGACUCGCC	308	13	1	331	26	7	280	21	N
Fvb5:25899236-25899933	IR_6567	Fvb5	25899236	25899933	698	2	2	1	+	UCUCAUGGUUCUGUUGAAGCU	1	0	0	1	0	0	1	21	N
Fvb5:26036134-26036490	IR_6575	Fvb5	26036134	26036490	357	924	131	0.746	.	UUCCAGGACAGCUUCUCUCCU	192	98	4	545	131	23	123	21	N
Fvb5:26168021-26168404	IR_6585	Fvb5	26168021	26168404	384	163	68	0.294	.	CCCGGACAACAGCACAGGCUU	16	3	0	59	34	14	53	21	N
Fvb5:26353286-26353984	IR_6593	Fvb5	26353286	26353984	699	191	144	0.33	.	UUCGGAUGUUUCUAAAAAGGA	9	11	1	74	31	18	56	21	N
Fvb5:26530839-26531536	IR_6608	Fvb5	26530839	26531536	698	313	122	0.399	.	CUAGAAUGGAUUCGUCGGGGA	26	30	30	172	31	9	41	21	N
Fvb5:26972398-26972665	IR_6640	Fvb5	26972398	26972665	268	974	133	0.681	.	ACUGGAAUUCGGCGGACUCGC	145	48	22	385	206	42	271	21	N
Fvb5:27710425-27710582	IR_6669	Fvb5	27710425	27710582	158	1	1	0	-	UUGAAGGUCUGUUAGCAUGAC	1	0	0	1	0	0	0	21	N
Fvb5:28390386-28390696	IR_6699	Fvb5	28390386	28390696	311	205	90	0.702	.	CACGGAAAUAGAAGUGCAGCU	54	15	1	132	25	10	22	21	N
Fvb5:28858649-28859071	IR_6715	Fvb5	28858649	28859071	423	372	72	0.831	+	UGAACCGGACAGAAUUCAGUC	159	9	7	161	2	40	153	21	N
Fvb5:29218521-29218871	IR_6729	Fvb5	29218521	29218871	351	1078	201	0.325	.	CCCGGACGACAGCACAGGCUU	501	68	2	684	43	48	233	21	N
Fvb6:82659-83098	IR_6741	Fvb6	82659	83098	440	47	15	0.085	-	UUGGUGAUCGUUAAGACUUUC	18	1	0	23	2	16	5	21	N
Fvb6:1020962-1021659	IR_6758	Fvb6	1020962	1021659	698	41361	3325	0.044	-	UUCAGUUCUGAUACGUUUAAA	924	1994	257	12964	10743	3658	11745	21	N
Fvb6:1294614-1295091	IR_6763	Fvb6	1294614	1295091	478	12709	941	0.4	.	UUUUCUUGGACUUGCACUACC	5151	985	31	8620	1563	558	952	21	N
Fvb6:1307070-1307526	IR_6764	Fvb6	1307070	1307526	457	32	15	0.844	+	UUCUGUGGGUCAGUCGUGCCA	13	1	0	28	2	1	0	21	N
Fvb6:1736406-1736680	IR_6779	Fvb6	1736406	1736680	275	124	40	0.879	+	GGAGAGAAGCCGUCGUCGGCG	18	11	0	43	16	11	43	21	N
Fvb6:2025099-2025469	IR_6782	Fvb6	2025099	2025469	371	878	240	0.203	.	UCUGUACUUGAAUGCAAGCCU	179	33	11	427	188	52	167	21	N
Fvb6:2152028-2152478	IR_6788	Fvb6	2152028	2152478	451	30472	1963	0.039	-	CUCGGCUAAAUACAAGCAGUG	1960	3158	649	18714	2881	936	4134	21	N
Fvb6:2245555-2246103	IR_6791	Fvb6	2245555	2246103	549	22	15	0.182	-	UCCGACGGUUACUGCAUGUAC	5	0	0	17	3	0	2	21	N
Fvb6:2803531-2804215	IR_6806	Fvb6	2803531	2804215	685	84716	4229	0.017	-	UCCGGCUAAAGGACGAGGACU	4429	6118	1656	29973	13632	5841	27496	21	N
Fvb6:2912192-2912464	IR_6810	Fvb6	2912192	2912464	273	155	83	0.787	.	CAGCAGCGUCCCCGACU	13	27	1	57	21	9	40	21	N
Fvb6:3371288-3371676	IR_6823	Fvb6	3371288	3371676	389	9851	983	0.947	+	UCCAUUCUCCGGCGUCGGCGA	2650	351	122	4470	2786	778	1344	21	N
Fvb6:3577751-3578068	IR_6840	Fvb6	3577751	3578068	318	1321	152	0.996	+	UAAUCGAACGAGUCGUCGCCGU	401	103	7	599	494	92	26	21	N
Fvb6:3956288-3956472	IR_6851	Fvb6	3956288	3956472	185	4	3	0.75	.	AAUUUCGUCGGCUAAAGUUGA	2	0	0	2	0	0	2	21	N
Fvb6:4608081-4608370	IR_6874	Fvb6	4608081	4608370	290	15	15	0.533	.	CAUGAGAGGGGAGAGGAGUGC	1	0	0	10	3	1	1	21	N
Fvb6:5008101-5008778	IR_6892	Fvb6	5008101	5008778	678	31	25	0.29	.	UUUUUUCUGUAUGUAUGUAUA	2	1	1	21	7	0	1	21	N
Fvb6:5027147-5027833	IR_6894	Fvb6	5027147	5027833	687	1608	272	0.989	+	UGACACCUGAUAACUCACCCU	299	191	37	1140	125	31	84	21	N
Fvb6:5028517-5029211	IR_6895	Fvb6	5028517	5029211	695	44539	3198	0.889	+	CACCAAUACUACUGACAGCCU	3138	2628	99	17185	13597	4734	6296	21	N
Fvb6:5674324-5674581	IR_6923	Fvb6	5674324	5674581	258	1	1	0	-	AAUUUAAAUGACGUUACACAA	1	0	0	1	0	0	0	21	N
Fvb6:6165233-6165663	IR_6954	Fvb6	6165233	6165663	431	2430	649	0.723	.	CCCGGACGACAGCACAGGCUU	403	350	89	965	164	178	684	21	N
Fvb6:6220280-6220522	IR_6961	Fvb6	6220280	6220522	243	39	17	0.154	-	CCGGAAAACUGGAAUUCGACG	16	2	0	17	2	6	12	21	N
Fvb6:7275353-7275802	IR_6992	Fvb6	7275353	7275802	450	40	17	0.825	+	AAUUUUUGAAAGUCUUAACGA	20	3	0	21	1	5	10	21	N
Fvb6:8300655-8300861	IR_7037	Fvb6	8300655	8300861	207	13	11	0.385	.	CCAACUAUUUCUGAAGAUACU	2	2	0	7	1	3	0	21	N
Fvb6:8436657-8437057	IR_7051	Fvb6	8436657	8437057	401	944	263	0.567	.	CCCGGACGACAGCACAGGCUU	109	116	11	326	56	148	287	21	N
Fvb6:9718545-9718821	IR_7118	Fvb6	9718545	9718821	277	116	60	0.517	.	UUAUGUCGAGAUGGCCAUCGG	14	7	1	78	17	5	8	21	N
Fvb6:10398563-10398913	IR_7141	Fvb6	10398563	10398913	351	40	18	0.725	.	CGGACGUCCGCACCUGAGAAU	13	2	0	22	0	2	14	21	N
Fvb6:10472056-10472753	IR_7149	Fvb6	10472056	10472753	698	3	3	0.667	.	UAAGUAGGGUGUCGUAUAGGG	1	0	0	1	1	0	1	21	N
Fvb6:10594535-10594813	IR_7153	Fvb6	10594535	10594813	279	3	2	0.667	.	UUAAUGAACUUGAUUUGGGGA	2	0	0	3	0	0	0	21	N
Fvb6:14532337-14532776	IR_7323	Fvb6	14532337	14532776	440	2066	589	0.84	+	UUCAUUCUAACACCGUCGGGG	136	126	21	1065	273	120	461	21	N
Fvb6:14542239-14542593	IR_7324	Fvb6	14542239	14542593	355	4	4	0.25	.	AUGGACAAAUACAACGAGGAU	1	0	0	4	0	0	0	21	N
Fvb6:14580067-14580765	IR_7330	Fvb6	14580067	14580765	699	6	5	0.333	.	AGGAGACGAACGUCAGACUCU	2	0	0	5	1	0	0	21	N
Fvb6:15604599-15604873	IR_7394	Fvb6	15604599	15604873	275	53	25	0.83	+	ACUGGAAUUCGGCGGACUCGC	18	3	0	24	3	5	18	21	N
Fvb6:15610535-15610915	IR_7395	Fvb6	15610535	15610915	381	138	56	0.572	.	ACUGGAAUUCGGCGGACUCGC	41	3	5	66	10	13	41	21	N
Fvb6:15925970-15926178	IR_7415	Fvb6	15925970	15926178	209	96	20	0.323	.	CCCGGACGACAGCACAGGCUU	45	0	0	61	1	4	30	21	N
Fvb6:17640208-17640536	IR_7484	Fvb6	17640208	17640536	329	11	7	0.455	.	CUGAAUUCCAGUUUUCCGGCG	4	2	0	4	0	2	3	21	N
Fvb6:17641015-17641708	IR_7486	Fvb6	17641015	17641708	694	115	25	0.974	+	UGAACCGGACAGAAUUCAGUC	52	2	1	67	14	16	15	21	N
Fvb6:18164952-18165237	IR_7531	Fvb6	18164952	18165237	286	44	18	0.295	.	ACUGGAAUUCGGCGGACUCGC	20	0	0	20	4	4	16	21	N
Fvb6:19012506-19012909	IR_7592	Fvb6	19012506	19012909	404	211	82	0.427	.	UUAACGAUCACCAAAUUGGCU	76	6	8	109	12	13	63	21	N
Fvb6:19257436-19258012	IR_7599	Fvb6	19257436	19258012	577	104	36	0.952	+	CAUAAACUGGUCUUCAUCCCCU	31	5	3	45	44	1	6	21	N
Fvb6:19328174-19328866	IR_7606	Fvb6	19328174	19328866	693	2683	410	0.369	.	UCUCUCUCGAACACAGAAACU	501	444	24	1297	452	314	152	21	N
Fvb6:19820273-19820804	IR_7628	Fvb6	19820273	19820804	532	87	38	0.713	.	CUGGAAUUCGGCGGACUCGCC	26	4	0	32	14	7	30	21	N
Fvb6:19820921-19821315	IR_7629	Fvb6	19820921	19821315	395	613	52	0.863	+	CCAGAGUACGGACGUCCGCUC	399	38	1	514	19	4	37	21	N
Fvb6:19948600-19948993	IR_7632	Fvb6	19948600	19948993	394	49	24	0.388	.	UCUAGAUCAUCUUGUGUAGAU	17	2	0	20	1	7	19	21	N
Fvb6:21189259-21189523	IR_7708	Fvb6	21189259	21189523	265	357	109	0.364	.	CCCGGACGACAGCACAGGCUU	109	24	1	172	16	14	130	21	N
Fvb6:22305863-22306550	IR_7800	Fvb6	22305863	22306550	688	13	13	0.462	.	CGACCAGCCAUUCAUAUACUG	1	0	0	8	3	0	2	21	N
Fvb6:23232901-23233344	IR_7836	Fvb6	23232901	23233344	444	121	45	0.843	+	AACUUUUGAAAGUCUUAACGA	60	2	2	62	5	11	39	21	N
Fvb6:23426341-23426793	IR_7847	Fvb6	23426341	23426793	453	76	14	0.026	-	CAAGAUGAUCUAGAUAUGUCU	56	0	0	59	0	3	14	21	N
Fvb6:24132889-24133309	IR_7887	Fvb6	24132889	24133309	421	1	1	0	-	CGGUGAAGAUAAGGAAAUUCA	1	0	0	1	0	0	0	21	N
Fvb6:24514188-24514387	IR_7904	Fvb6	24514188	24514387	200	1	1	0	-	CGGUUAAAGUUGACUAUAGCC	1	0	0	1	0	0	0	21	N
Fvb6:25231122-25231568	IR_7937	Fvb6	25231122	25231568	447	101	36	0.822	+	CAAUUUGGUGAUCGUUAAGGC	37	1	0	58	5	3	34	21	N
Fvb6:26003805-26004252	IR_7979	Fvb6	26003805	26004252	448	900	238	0.254	.	UUUUGGUCGAAAUUAAUGUCA	191	107	9	374	77	67	266	21	N
Fvb6:26430570-26431004	IR_8013	Fvb6	26430570	26431004	435	17	11	0.882	+	UAGAUAUGUCUAGAAAGAAGUU	3	0	0	7	5	0	5	21	N
Fvb6:26862658-26862858	IR_8040	Fvb6	26862658	26862858	201	112	10	0.045	-	AAUUUCGUCGGCUAAAGUUGA	92	0	3	92	0	2	15	21	N
Fvb6:27158627-27159145	IR_8050	Fvb6	27158627	27159145	519	10	9	0.1	-	UUGAUACAACAAGCUACGGUU	2	0	1	7	0	1	1	21	N
Fvb6:27674047-27674456	IR_8070	Fvb6	27674047	27674456	410	4	2	0.25	.	UCAUGUAUCCUAUCUUGGACU	2	0	0	2	2	0	0	21	N
Fvb6:28491516-28491798	IR_8119	Fvb6	28491516	28491798	283	60	32	0.817	+	CCGGCGACGGCUUCUCUCUUU	19	10	1	31	4	0	14	21	N
Fvb6:28814140-28814679	IR_8140	Fvb6	28814140	28814679	540	613	135	0.974	+	ACGAAAUCGGAGUUGUUUUCC	174	110	4	447	19	9	24	21	N
Fvb6:29538184-29538511	IR_8170	Fvb6	29538184	29538511	328	160	30	0.256	.	UCUAGAUCAUCUUGUGUAGAU	107	0	1	116	0	9	34	21	N
Fvb6:30029838-30030253	IR_8198	Fvb6	30029838	30030253	416	89	35	0.607	.	UCUGCACUCCGGCUUAAAGUG	16	12	1	35	20	2	19	21	N
Fvb6:30138288-30138610	IR_8201	Fvb6	30138288	30138610	323	10	9	0.2	.	UGCCUUUGAUUGUUACGUUCU	2	1	1	4	2	1	1	21	N
Fvb6:33423081-33423370	IR_8355	Fvb6	33423081	33423370	290	62	15	0.758	.	CUGGAAUUCGGCGGACUCGCC	43	1	0	45	0	4	12	21	N
Fvb6:35097205-35097558	IR_8425	Fvb6	35097205	35097558	354	742	250	0.757	.	CCGGACGACAGCACAGGCUUC	149	52	5	277	87	84	237	21	N
Fvb6:35113049-35113569	IR_8426	Fvb6	35113049	35113569	521	16809	1355	0.309	.	CUGGACAAGGUUGAUAUUCUG	2127	679	23	13722	1587	429	369	21	N
Fvb6:35814223-35814920	IR_8449	Fvb6	35814223	35814920	698	12233	1223	0.747	.	CCAACUCAUGAGAUUGUGCCU	3703	690	55	8108	1857	429	1094	21	N
Fvb6:36514087-36514503	IR_8466	Fvb6	36514087	36514503	417	71	33	0.239	.	UCUCUCUUUCCCGGACGACAGC	15	2	1	24	22	5	17	21	N
Fvb6:37712080-37712778	IR_8497	Fvb6	37712080	37712778	699	8	8	0.5	.	AUUUGGCAAAUGAAAAUAUGACAU	1	0	0	3	3	0	2	21	N
Fvb6:38241597-38242021	IR_8509	Fvb6	38241597	38242021	425	4	4	1	+	AGCCCUUCUUGGCUGCGGACG	1	0	0	3	0	1	0	21	N
Fvb6:38253190-38253534	IR_8510	Fvb6	38253190	38253534	345	48	13	0.229	.	CCCGGACGACAGCACAGGCUU	21	0	0	24	1	1	22	21	N
Fvb6:38640890-38641588	IR_8532	Fvb6	38640890	38641588	699	14967	1935	0.153	-	CGAGAGUAUGGAAUUACGGAUC	771	1233	227	5135	2806	1091	4475	21	N
Fvb6:38815195-38815647	IR_8543	Fvb6	38815195	38815647	453	1950	611	0.545	.	CCCGGACAACAGCACAGGCUU	235	217	19	811	153	174	576	21	N
Fvb6:38827017-38827666	IR_8544	Fvb6	38827017	38827666	650	8456	1540	0.206	.	UUACAAAUAGGAUCUUGGGAU	593	1155	41	5282	1254	213	511	21	N
Fvb6:39229316-39230013	IR_8555	Fvb6	39229316	39230013	698	2253	700	0.77	.	GUUCACUGAAGAGCUCUUCUG	52	192	4	1437	411	64	145	21	N
Fvb7:885207-885628	IR_8596	Fvb7	885207	885628	422	168	41	0.756	.	UGAACCGGACAGAAUUCAGUC	53	7	5	65	4	27	60	21	N
Fvb7:3044913-3045473	IR_8691	Fvb7	3044913	3045473	561	114	47	0.526	.	UUUUAAGAUGAUCCAAAGGCC	36	10	2	82	14	4	2	21	N
Fvb7:3640560-3640858	IR_8722	Fvb7	3640560	3640858	299	140	28	0.921	+	AAACUGGAAUUCGACGGACUC	73	2	1	79	14	20	24	21	N
Fvb7:3640608-3641182	IR_8723	Fvb7	3640608	3641182	575	149	32	0.919	+	AAACUGGAAUUCGACGGACUC	73	1	1	80	14	22	31	21	N
Fvb7:4261979-4262351	IR_8738	Fvb7	4261979	4262351	373	127	11	0.969	+	AACGAUCACCAAAUUGGCUGA	115	1	1	115	3	2	5	21	N
Fvb7:4602447-4602917	IR_8758	Fvb7	4602447	4602917	471	2251	518	0.744	.	CCCGGACGACAGCACAGGCUU	469	172	30	987	245	115	702	21	N
Fvb7:6772827-6773027	IR_8832	Fvb7	6772827	6773027	201	244	98	0.512	.	CCGAUUGAAGAAGUUGUUUGAU	30	21	0	129	62	13	19	21	N
Fvb7:7884941-7885122	IR_8865	Fvb7	7884941	7885122	182	25	18	0.32	.	GUCACCAUGGCAAACUGAGGA	3	1	0	16	5	0	3	21	N
Fvb7:8155179-8155477	IR_8882	Fvb7	8155179	8155477	299	410	104	0.344	.	UCUGCACUCCGGCUUAAAGUG	190	18	0	236	20	38	98	21	N
Fvb7:8349249-8349710	IR_8890	Fvb7	8349249	8349710	462	588	87	0.855	+	UUUGGUGAUCGUUAAGGCUUU	349	7	3	361	8	92	117	21	N
Fvb7:8876852-8877135	IR_8919	Fvb7	8876852	8877135	284	1352	386	0.521	.	AAACUGGAAUUCGACGGACUC	195	121	15	540	98	60	518	21	N
Fvb7:9637819-9638205	IR_8950	Fvb7	9637819	9638205	387	151	54	0.417	.	AAUUUGGUGAUCGUUAAGGCC	36	6	2	52	31	11	49	21	N
Fvb7:9901028-9901572	IR_8961	Fvb7	9901028	9901572	545	32	16	0.844	+	UUUGCCGGAGAAAGGAAGAAG	12	3	1	16	4	2	6	21	N
Fvb7:9972148-9972541	IR_8970	Fvb7	9972148	9972541	394	66	27	0.758	.	UAUAUAAGUAGAUCACUUCUG	20	0	0	25	12	6	23	21	N
Fvb7:11625685-11625979	IR_9043	Fvb7	11625685	11625979	295	49	30	0.816	+	CGGAAAACUGGAAUUCGGUGG	11	1	0	21	6	1	20	21	N
Fvb7:12612984-12613407	IR_9078	Fvb7	12612984	12613407	424	38	26	0.474	.	GAGGUCUGGGAUCACGCCGGG	5	2	1	18	8	1	8	21	N
Fvb7:12688652-12688867	IR_9082	Fvb7	12688652	12688867	216	8	6	0.125	-	UUGACAGUCUCGGAGAUCAGU	3	1	0	5	0	2	0	21	N
Fvb7:13764112-13764496	IR_9129	Fvb7	13764112	13764496	385	827	206	0.516	.	UUCCAAGACGGUUUCUCUCCU	134	66	5	403	93	42	218	21	N
Fvb7:14059845-14060182	IR_9146	Fvb7	14059845	14060182	338	11	7	0.636	.	CGAAUGACAAUGCUUAAACCC	5	0	1	7	0	0	3	21	N
Fvb7:14252496-14253149	IR_9152	Fvb7	14252496	14253149	654	2	2	0	-	UUUGGAUAGAGUUACGUUGUG	1	0	0	2	0	0	0	21	N
Fvb7:15582802-15583005	IR_9205	Fvb7	15582802	15583005	204	7	6	0.714	.	UGGCUAAAAAUAGAAAGUGGGAGU	2	0	0	4	1	0	2	21	N
Fvb7:16423699-16423966	IR_9231	Fvb7	16423699	16423966	268	571	176	0.531	.	CCCGGACAACAGCACAGGCUU	115	20	3	280	89	30	149	21	N
Fvb7:16566638-16566953	IR_9232	Fvb7	16566638	16566953	316	53	30	0.717	.	UUGAGGAAAUUCGAUCGGGAAG	7	7	2	19	12	3	10	21	N
Fvb7:18014781-18015130	IR_9282	Fvb7	18014781	18015130	350	3038	354	0.75	.	UUGGACUUGAUCAGCUUUGGG	288	147	3	2643	204	11	30	21	N
Fvb7:18050683-18051317	IR_9284	Fvb7	18050683	18051317	635	2	2	1	+	UUUCCACAUUUUUGCAUGAGA	1	0	0	2	0	0	0	21	N
Fvb7:19297573-19297961	IR_9325	Fvb7	19297573	19297961	389	9	8	0.444	.	UUGUGUGACUGGUGAAUCGCA	2	0	0	4	0	1	4	21	N
Fvb7:20116445-20116908	IR_9349	Fvb7	20116445	20116908	464	978	56	0.691	.	AACUUUUGAAAGUCUUAACGA	589	4	1	656	10	43	264	21	N
Fvb7:20650222-20650661	IR_9356	Fvb7	20650222	20650661	440	541	115	0.839	+	UAUGAAAUUUUGUAGAGGUGA	268	17	8	285	76	21	134	21	N
Fvb7:22127648-22128345	IR_9400	Fvb7	22127648	22128345	698	9821	1454	0.041	-	CAGGGAAUUAGAAUUACACUU	512	540	32	3475	3251	1328	1195	21	N
Fvb7:22504884-22505242	IR_9409	Fvb7	22504884	22505242	359	77	45	0.195	-	UAUCAUUCUUCUGACUAGGUG	11	14	1	34	11	3	14	21	N
Fvb7:22992038-22992601	IR_9420	Fvb7	22992038	22992601	564	10	10	0.3	.	UUUGAUCGAACGGUUAGUAGU	1	2	0	4	1	1	2	21	N
Fvb7:23208618-23209278	IR_9430	Fvb7	23208618	23209278	661	48312	1794	0.195	-	CUUGAACAACUAUUACCGGGA	16781	1662	62	38627	6400	1068	493	21	N
Fvb7:23900983-23901680	IR_9449	Fvb7	23900983	23901680	698	16163	1572	0.526	.	CAACUGAACAUCCAAAGGUGU	709	324	0	7464	6068	1043	1264	21	N
Fvb7:24166117-24166582	IR_9455	Fvb7	24166117	24166582	466	1852	414	0.26	.	UUGUUGAGGACGAUGUUAGUU	130	84	7	1423	240	56	42	21	N
Fvb1:734104-734802	IR_24	Fvb1	734104	734802	699	754	282	0.855	+	AAGAACUGUAGUAUCUUCCU	51	78	5	149	245	95	182	22	N
Fvb1:4606975-4607397	IR_146	Fvb1	4606975	4607397	423	2169	360	0.153	-	UCUCUCUUUCCCGGACGACAGC	511	119	21	592	797	123	517	22	N
Fvb1:13178505-13178904	IR_492	Fvb1	13178505	13178904	400	50	14	0.18	-	CGGUGGAGAUGAGGAAAUUCGA	30	0	0	6	34	3	7	22	N
Fvb1:13415986-13416458	IR_506	Fvb1	13415986	13416458	473	54	17	0.889	+	UUUCAUAUGAUUUGGUGAUCGU	32	0	0	2	34	1	17	22	N
Fvb1:13885609-13886020	IR_540	Fvb1	13885609	13886020	412	244	79	0.865	+	CAUAUGAAAUUUUGUAGAGGUG	117	12	2	8	128	22	72	22	N
Fvb1:22837313-22837501	IR_960	Fvb1	22837313	22837501	189	3	3	0.333	.	UGCUGGAGUCUUCUGGGGUGGA	1	0	0	0	2	1	0	22	N
Fvb2:4609795-4610001	IR_1253	Fvb2	4609795	4610001	207	4	4	0.5	.	UGGGUCUGUCUCAUCUGAGUGA	1	0	0	1	2	0	1	22	N
Fvb2:7422545-7422976	IR_1374	Fvb2	7422545	7422976	432	28	13	0.786	.	UAGAUAUGUCUAGAAGGAAGUU	12	2	0	2	13	1	10	22	N
Fvb2:9946168-9946456	IR_1484	Fvb2	9946168	9946456	289	77	25	0.883	+	AAUGAUCCACUCAUAUAUAUGA	21	0	0	2	43	6	26	22	N
Fvb2:11824301-11824657	IR_1600	Fvb2	11824301	11824657	357	69	34	0.739	.	UUAUUAUGACUUAUAUGAGGGA	25	2	0	1	26	14	26	22	N
Fvb2:12377373-12377822	IR_1659	Fvb2	12377373	12377822	450	36	22	0.667	.	AAAUUGGCUGAAAUUUUGCAGA	7	0	0	8	12	4	12	22	N
Fvb2:15439459-15440157	IR_1841	Fvb2	15439459	15440157	699	652	173	0.839	+	UCGAAACCUGGCUCUGAUACCA	155	44	55	46	221	136	150	22	N
Fvb2:15643771-15644303	IR_1850	Fvb2	15643771	15644303	533	2	2	1	+	CACUAUAAUUCGUCGGCUAAAGU	1	0	0	0	1	1	0	22	N
Fvb2:16952869-16953546	IR_1920	Fvb2	16952869	16953546	678	2	2	1	+	UCAACCCAGACAAAAAAAACUC	1	0	0	0	1	1	0	22	N
Fvb2:18844601-18845035	IR_2006	Fvb2	18844601	18845035	435	89	35	0.719	.	AAAUUGGCUGAAAUUUUGCAGA	26	1	1	28	35	8	16	22	N
Fvb2:26418420-26419117	IR_2258	Fvb2	26418420	26419117	698	13881	1634	0.263	.	CCAAGGCUGUAUUAACAAGAUU	1115	948	47	3784	5811	1479	1812	22	N
Fvb2:26493271-26493676	IR_2260	Fvb2	26493271	26493676	406	544	210	0.79	.	UUGAACGGUUAAGAUUGGAAAU	67	11	0	98	195	69	171	22	N
Fvb2:27033239-27033937	IR_2283	Fvb2	27033239	27033937	699	21266	2264	0.838	+	AAGAGAUGAUGAACCAUGACAAC	590	1067	150	5433	7732	3136	3748	22	N
Fvb2:27624008-27624441	IR_2298	Fvb2	27624008	27624441	434	94	29	0.128	-	CGGUGGAGAUGAGGAAAUUCGA	40	1	0	4	45	6	38	22	N
Fvb2:28749241-28749939	IR_2324	Fvb2	28749241	28749939	699	54544	3216	0.892	+	UCCAGCCUUAGAGAUGAUGAAC	2414	2508	321	17278	24184	5934	4319	22	N
Fvb3:40757-41431	IR_2347	Fvb3	40757	41431	675	131773	4099	0.215	.	CGACACCGUAAUCCCUGAAAGU	8915	3708	474	21414	66088	23971	16118	22	N
Fvb3:827408-827864	IR_2360	Fvb3	827408	827864	457	290	42	0.841	+	UUUCAUAUGAUUUGGUGAUCGU	160	2	2	3	177	21	85	22	N
Fvb3:3138394-3139091	IR_2432	Fvb3	3138394	3139091	698	3627	812	0.878	+	CGUGCUCUGUUUAUUGUAGAUU	153	137	51	488	1494	694	763	22	N
Fvb3:3748574-3749020	IR_2458	Fvb3	3748574	3749020	447	69	33	0.768	.	UUAUUAUGACUUAUAUGAGGGA	21	0	0	10	32	4	23	22	N
Fvb3:8426124-8426822	IR_2643	Fvb3	8426124	8426822	699	6	6	0.167	-	CAUGACCUUCGGAUUUAAAUGA	1	0	0	2	3	0	1	22	N
Fvb3:10046619-10047317	IR_2717	Fvb3	10046619	10047317	699	180	99	0.111	-	AAAUGGGAUGUAUGUAGAUCAU	12	9	2	34	86	25	24	22	N
Fvb3:10308879-10309291	IR_2739	Fvb3	10308879	10309291	413	164	51	0.201	.	UAUCUAGAUCAUCUUGUGUAGA	51	0	1	46	58	14	45	22	N
Fvb3:13594310-13594724	IR_2905	Fvb3	13594310	13594724	415	120	35	0.858	+	UAUCUAGAUCAUCUUGUGUAGA	49	6	1	9	59	23	22	22	N
Fvb3:18546120-18546375	IR_3150	Fvb3	18546120	18546375	256	302	105	0.689	.	UUGAGCACUAAACCAUGGCUGG	62	11	0	58	165	31	37	22	N
Fvb3:25898932-25899354	IR_3543	Fvb3	25898932	25899354	423	134	28	0.403	.	UAUCUAGAUCAUCUUGUGUAGA	51	2	2	29	54	8	39	22	N
Fvb3:29276756-29277216	IR_3655	Fvb3	29276756	29277216	461	117	24	0.214	.	UAAAUUGAACUUUUGAAAGCCU	54	0	0	2	59	4	52	22	N
Fvb3:34551609-34552307	IR_3955	Fvb3	34551609	34552307	699	2732	798	0.857	+	UAGAUAUGGGCUUGAACGGGAA	257	104	29	536	882	368	813	22	N
Fvb4:1049488-1049847	IR_4137	Fvb4	1049488	1049847	360	34	20	0.471	.	CAAAUUGGCUGAAAUUUUGCAG	7	3	0	3	14	0	14	22	N
Fvb4:3575015-3575712	IR_4274	Fvb4	3575015	3575712	698	16	11	0.125	-	UGUAGAGUCGUAAUUGUAGAUU	5	3	0	4	8	0	1	22	N
Fvb4:3820426-3820754	IR_4285	Fvb4	3820426	3820754	329	56	19	0.304	.	CGGUGGAGAUGAGGAAAUUCGA	30	2	0	3	35	2	14	22	N
Fvb4:11717350-11717791	IR_4567	Fvb4	11717350	11717791	442	103	26	0.437	.	CGGUGGAGAUGAGGAAAUUCGA	50	0	0	4	57	10	32	22	N
Fvb4:14634204-14634851	IR_4644	Fvb4	14634204	14634851	648	223	157	0.408	.	UAUUGAUAAUCUUUGAAGUGA	7	20	4	60	85	10	44	22	N
Fvb4:15916460-15917158	IR_4680	Fvb4	15916460	15917158	699	1476	109	0.938	+	UUUCAUAUGAUUUGGUGAUCGU	610	19	7	599	657	35	159	22	N
Fvb4:18161887-18162309	IR_4802	Fvb4	18161887	18162309	423	100	32	0.83	+	UCUAGAUACUAGACGGUGGAGA	26	0	2	6	47	12	33	22	N
Fvb4:22140370-22140764	IR_4987	Fvb4	22140370	22140764	395	284	80	0.764	.	UAUCUAGAUCAUCUUGUGUAGA	103	11	1	64	118	12	78	22	N
Fvb4:23168035-23168399	IR_5042	Fvb4	23168035	23168399	365	68	34	0.824	+	UCUAGAUACUAGACGGUGGAGA	26	1	0	7	28	6	26	22	N
Fvb4:24544843-24545269	IR_5124	Fvb4	24544843	24545269	427	145	60	0.814	+	UAUCUAGAUCAUCUUGUGUAGA	24	5	5	31	62	14	28	22	N
Fvb4:24545099-24545417	IR_5125	Fvb4	24545099	24545417	319	63	24	0.857	+	UAGAUAUGUCUAGAAGGAAGUU	16	1	0	20	23	7	12	22	N
Fvb4:27741333-27741501	IR_5249	Fvb4	27741333	27741501	169	1	1	0	-	UGAUAUGUGGAAACAUGGUUGC	1	0	0	0	1	0	0	22	N
Fvb4:31009711-31010151	IR_5362	Fvb4	31009711	31010151	441	113	39	0.186	-	UAAAUUGAACUUUUGAAAGCCU	54	1	0	4	57	12	39	22	N
Fvb4:31273687-31274107	IR_5377	Fvb4	31273687	31274107	421	647	209	0.286	.	UUGAACGGUUAAGAUUGGAAAU	221	12	2	16	288	66	263	22	N
Fvb4:33303439-33304136	IR_5432	Fvb4	33303439	33304136	698	107459	5363	0.866	+	UUGGCGGAAGGAUUCUUAGAAG	3003	5903	581	22566	44909	14716	18784	22	N
Fvb5:1880885-1881176	IR_5527	Fvb5	1880885	1881176	292	4	2	1	+	UCUUGUGUAGAUCAUCUCUGUA	3	0	0	0	4	0	0	22	N
Fvb5:17843764-17844462	IR_6200	Fvb5	17843764	17844462	699	728	399	0.426	.	CCCGGAUUGAUCGAAUUUGAUU	24	43	5	94	328	115	143	22	N
Fvb5:17998062-17998465	IR_6206	Fvb5	17998062	17998465	404	1755	458	0.647	.	UUGAACGGUUAAGAUUGGAAA	204	49	2	345	653	205	501	22	N
Fvb5:21697492-21698190	IR_6406	Fvb5	21697492	21698190	699	315	149	0.505	.	CACCCUAAAGUCCGCGGAUUGA	30	14	8	33	115	32	113	22	N
Fvb5:23567991-23568676	IR_6462	Fvb5	23567991	23568676	686	7696	1466	0.92	+	UGGGCUGGUGAUAUUGUCGGUC	192	308	23	1449	3245	963	1708	22	N
Fvb5:24080629-24081326	IR_6489	Fvb5	24080629	24081326	698	43	34	0.93	+	UUAGUAUCUAAUUGAAUAGGGA	5	0	0	14	16	6	7	22	N
Fvb5:25082387-25082541	IR_6538	Fvb5	25082387	25082541	155	1	1	0	-	CGACAAAAAAGUCAUCGGCUAU	1	0	0	0	1	0	0	22	N
Fvb6:517925-518622	IR_6754	Fvb6	517925	518622	698	37111	2947	0.102	-	UUUUUGACAUCCUCUGACCGA	778	1554	98	11387	15040	4860	4172	22	N
Fvb6:606706-607404	IR_6755	Fvb6	606706	607404	699	1171	484	0.198	-	UGCCUCAGGACUUGUUUUACUG	45	45	1	254	435	179	257	22	N
Fvb6:9998425-9998623	IR_7127	Fvb6	9998425	9998623	199	2	2	0	-	CAAAGUUUUUGGUGCGGAUUUCA	1	0	0	0	1	1	0	22	N
Fvb6:10160081-10160534	IR_7130	Fvb6	10160081	10160534	454	188	66	0.021	-	UGUGGCAGUUGAAGAAUUUGAG	47	13	1	55	98	13	8	22	N
Fvb6:11546037-11546735	IR_7190	Fvb6	11546037	11546735	699	50506	3324	0.788	.	UUGGACCAGUCUUGACUAAAAC	1122	2066	127	9572	24601	8409	5731	22	N
Fvb6:12805847-12806296	IR_7249	Fvb6	12805847	12806296	450	405	91	0.958	+	CUGAGAAGGCCUGUAUAUAUAU	84	68	9	78	98	85	67	22	N
Fvb6:13563672-13564174	IR_7290	Fvb6	13563672	13564174	503	23	9	0.174	-	UUGAACGGUUAAGAUUGGAAAU	13	1	0	1	14	0	7	22	N
Fvb6:15572646-15572894	IR_7390	Fvb6	15572646	15572894	249	2	2	1	+	AUACUAUAUUUCGUCGGCUAAGAU	1	0	0	0	1	0	1	22	N
Fvb6:18367476-18367663	IR_7548	Fvb6	18367476	18367663	188	41	18	0.805	+	AAACUGGAAUUCGGCGGACUCG	17	0	0	7	19	2	13	22	N
Fvb6:28488881-28489346	IR_8116	Fvb6	28488881	28489346	466	81	25	0.889	+	UUGAACGGUUAAGAUUGGAAAU	20	0	0	16	45	3	17	22	N
Fvb6:30198139-30198836	IR_8203	Fvb6	30198139	30198836	698	1369	267	0.454	.	CAACAUGUAGAGACACCAGAGA	416	35	2	553	647	66	66	22	N
Fvb6:34784784-34785205	IR_8410	Fvb6	34784784	34785205	422	12	9	0.5	.	UGAUUUGGUGAUCGUUAAGACU	3	1	0	0	4	3	4	22	N
Fvb6:38312626-38313324	IR_8516	Fvb6	38312626	38313324	699	3515	908	0.179	-	CAGGAGCCAGACUCAAUGCUGA	160	99	0	1164	1198	367	687	22	N
Fvb6:38640243-38640445	IR_8531	Fvb6	38640243	38640445	203	2190	244	0.18	-	CGAGGAAGUAUGAGCAAUCUGCU	325	186	7	573	801	432	191	22	N
Fvb7:10291043-10291482	IR_8985	Fvb7	10291043	10291482	440	1	1	1	+	CCGCACCUAAGAAUUUCUAUAU	1	0	0	0	1	0	0	22	N
Fvb7:15173272-15173677	IR_9185	Fvb7	15173272	15173677	406	533	103	0.704	.	UAGACCUAAGAUAUGAACGGUG	196	15	11	25	213	62	207	22	N
Fvb7:20870580-20871278	IR_9358	Fvb7	20870580	20871278	699	11856	1753	0.61	.	UAGCAUGGGAAUUAACUCGUA	584	559	13	2885	5431	958	2010	22	N
Fvb7:22452395-22453092	IR_9407	Fvb7	22452395	22453092	698	53	44	0.226	.	UGAUGUAGACUCAACUGGCAUA	4	8	2	11	20	5	7	22	N
Fvb7:24152724-24153061	IR_9454	Fvb7	24152724	24153061	338	48	19	0.417	.	CGGUGGAGAUGAGGAAAUUCGA	19	1	0	1	22	3	21	22	N
Fvb1:2859648-2860089	IR_88	Fvb1	2859648	2860089	442	15	13	0.333	.	AUAAUAUUGUGUAGAUCAUCUCA	2	2	1	3	2	4	3	23	N
Fvb1:10179048-10179540	IR_344	Fvb1	10179048	10179540	493	4	4	0.5	.	AAGAGGUAGAUGAUGAUGACACA	1	0	0	0	0	2	2	23	N
Fvb1:15408048-15408606	IR_597	Fvb1	15408048	15408606	559	20	15	0.8	+	UGCAGAAGAUCAACGCUGGCCGUU	2	1	0	5	2	6	6	23	N
Fvb1:17603395-17603637	IR_722	Fvb1	17603395	17603637	243	51	8	1	+	ACGAAAAAAUAAUUCGUCGGCCU	38	0	1	0	8	40	2	23	N
Fvb1:17799879-17800056	IR_732	Fvb1	17799879	17800056	178	117	41	0.222	.	CCGACGACGGCGCUCCUCCACCC	57	8	1	12	1	60	35	23	N
Fvb1:18353051-18353399	IR_766	Fvb1	18353051	18353399	349	338	82	0.769	.	CCGACGACGGCGCUCCUCCACCC	197	4	6	17	7	208	96	23	N
Fvb2:297376-297675	IR_1049	Fvb2	297376	297675	300	15	11	0.667	.	UCGAGUUUUUCUGGUAUGAACAC	4	0	0	0	2	7	6	23	N
Fvb2:1499477-1499890	IR_1093	Fvb2	1499477	1499890	414	2749	348	0.286	.	UAGACAUGUAGAUUUUCUUCACA	919	41	47	41	283	1175	1162	23	N
Fvb2:1596081-1596294	IR_1103	Fvb2	1596081	1596294	214	1	1	0	-	UUUGUUUUUCGAUUUUGAGGGCA	1	0	0	0	0	1	0	23	N
Fvb2:5004552-5004945	IR_1275	Fvb2	5004552	5004945	394	2	2	0	-	AGAAAAUUUGAUGAUCGUUAAGU	1	0	0	0	0	2	0	23	N
Fvb2:5496932-5497383	IR_1291	Fvb2	5496932	5497383	452	138	19	0.928	+	AAAUCUGACGGACUGAAUUCUGU	53	0	0	5	26	55	52	23	N
Fvb2:7915961-7916440	IR_1396	Fvb2	7915961	7916440	480	2	2	0	-	UCUAUAUAAGUAGAUCACUUCUGC	1	0	0	0	0	1	1	23	N
Fvb2:10489450-10490131	IR_1515	Fvb2	10489450	10490131	682	14	13	0.571	.	UCCUUCUGUUCUUCCUUUCUGUC	2	2	0	3	2	4	3	23	N
Fvb2:12105568-12106029	IR_1616	Fvb2	12105568	12106029	462	7	7	0.429	.	AGGGUCUUGUAUAUAUAUAUAUA	1	1	0	0	1	3	2	23	N
Fvb2:14205451-14205888	IR_1763	Fvb2	14205451	14205888	438	3	3	0	-	UGUAAAUCUCAAUUCCACAAGGAU	1	0	0	0	0	2	1	23	N
Fvb2:15687218-15687586	IR_1858	Fvb2	15687218	15687586	369	1	1	1	+	AGGGAUAGAUCAUUUGACGAACA	1	0	0	0	0	1	0	23	N
Fvb2:16147528-16147758	IR_1873	Fvb2	16147528	16147758	231	85	22	0.153	-	CCGACGACGGCGCUCCUCCACCC	58	0	1	0	2	60	22	23	N
Fvb2:18028460-18028918	IR_1966	Fvb2	18028460	18028918	459	2	2	0.5	.	UUUCGAUUUUGAGGGCCUUAACU	1	0	0	0	0	1	1	23	N
Fvb2:22160868-22161034	IR_2102	Fvb2	22160868	22161034	167	2	2	0.5	.	CCUUACCCGACUAAUAACUAUCU	1	0	0	0	0	2	0	23	N
Fvb2:23677764-23677930	IR_2178	Fvb2	23677764	23677930	167	2	2	0.5	.	GAUAAAAUUGUUAUCGAUUUUCGA	1	0	0	0	0	1	1	23	N
Fvb2:25154944-25155442	IR_2213	Fvb2	25154944	25155442	499	521	77	0.808	+	AAAUCUGACGGACUGAAUUCUGU	237	10	9	12	20	279	191	23	N
Fvb2:25708204-25708514	IR_2231	Fvb2	25708204	25708514	311	2	2	0.5	.	GUAUUUCGUCGGCUAUAGUAUGC	1	0	0	0	0	1	1	23	N
Fvb3:3830918-3831311	IR_2467	Fvb3	3830918	3831311	394	74	25	0.311	.	CCGAGAAGGGCUGUAUAUAUAUA	29	1	3	6	2	31	31	23	N
Fvb3:6118467-6118936	IR_2555	Fvb3	6118467	6118936	470	10	6	0.7	.	GGAAAUUCGAUCGAAAAGUGGUU	5	1	0	0	1	6	2	23	N
Fvb3:7328346-7328757	IR_2602	Fvb3	7328346	7328757	412	36	16	0.111	-	GAGAAAGGCUGUAUAUAUAUAUU	12	1	0	0	0	23	12	23	N
Fvb3:7862282-7862715	IR_2621	Fvb3	7862282	7862715	434	16	9	0.75	.	CCGAGAAGGGCUGUGUAUAUAUA	4	0	0	1	1	7	7	23	N
Fvb3:9426391-9426665	IR_2691	Fvb3	9426391	9426665	275	6	6	0.333	.	CAUGGAGAACGGAUGGACGU	1	1	0	0	1	2	2	23	N
Fvb3:9840845-9841267	IR_2710	Fvb3	9840845	9841267	423	69	24	0.942	+	CGGCAGAGAACGGACGAAGUCCA	24	1	0	10	2	29	27	23	N
Fvb3:18345725-18346113	IR_3137	Fvb3	18345725	18346113	389	64	17	0.953	+	UAUGUUAAAUGUAGACUUUGCCU	33	0	1	1	0	44	18	23	N
Fvb3:20399268-20399630	IR_3245	Fvb3	20399268	20399630	363	23	9	0.913	+	AAAUCAGAUUGAGAAUUCCUAAU	8	1	0	0	4	13	5	23	N
Fvb3:22889968-22890395	IR_3406	Fvb3	22889968	22890395	428	6	6	1	+	ACAUGAUUAGAUUAUCUCUGUAAA	1	0	0	1	0	3	2	23	N
Fvb3:24738051-24738410	IR_3515	Fvb3	24738051	24738410	360	43	23	0.884	+	AACACUAUAUUCGUCGGCUAUAGU	6	1	1	6	1	17	17	23	N
Fvb3:27818543-27818733	IR_3597	Fvb3	27818543	27818733	191	9	7	0.778	.	ACGAAAUUUUCCUUCGUCGGCUA	2	0	0	1	0	5	3	23	N
Fvb3:28492172-28492603	IR_3619	Fvb3	28492172	28492603	432	12	8	0.333	.	CCAAGAAGGCCUGUAUAUAUAUA	3	0	0	2	0	6	4	23	N
Fvb4:1961987-1962175	IR_4157	Fvb4	1961987	1962175	189	2	2	0.5	.	UAGCGAGAAUCACUCUGUUCCUCA	1	0	0	0	0	1	1	23	N
Fvb4:7462268-7462642	IR_4439	Fvb4	7462268	7462642	375	9	7	0.667	.	CCGCAGCUGAGAAAAUCCGUAUA	3	0	0	0	2	5	2	23	N
Fvb4:7526698-7526852	IR_4444	Fvb4	7526698	7526852	155	4	4	0.5	.	UAUACCUGUGUCGUCGGCUAAAGU	1	0	0	0	0	3	1	23	N
Fvb4:8987385-8987539	IR_4492	Fvb4	8987385	8987539	155	2	2	0.5	.	UCUGGACUAUAGCCGACGAAACA	1	0	0	0	0	1	1	23	N
Fvb4:9718786-9719206	IR_4507	Fvb4	9718786	9719206	421	136	31	0.941	+	AUUUGAGAGUACAAGGACCAACA	77	0	4	0	0	86	46	23	N
Fvb4:10592248-10592724	IR_4525	Fvb4	10592248	10592724	477	72	41	0.528	.	CUGAGAAAAAUCGUAUAUAUAUG	13	3	2	5	21	23	18	23	N
Fvb4:11365935-11366138	IR_4553	Fvb4	11365935	11366138	204	1	1	0	-	CGGCUAAAGUUCUUUAUAUUCGC	1	0	0	0	0	1	0	23	N
Fvb4:13006227-13006619	IR_4595	Fvb4	13006227	13006619	393	9	9	0.444	.	AUAUAUCCACCAAAAAUCUCAUU	1	0	0	1	0	4	4	23	N
Fvb4:15436945-15437432	IR_4667	Fvb4	15436945	15437432	488	129	34	0.279	.	AAGGACUAACAUGAUGAUCGACA	54	2	1	0	12	67	47	23	N
Fvb4:17967865-17968065	IR_4791	Fvb4	17967865	17968065	201	1	1	1	+	GCGAAUAUAAAGAACUUUAGCCU	1	0	0	0	0	1	0	23	N
Fvb4:33589479-33589842	IR_5442	Fvb4	33589479	33589842	364	3	3	0.667	.	AUUCCUCCGUCUAAACAUUGAUG	1	0	0	0	1	2	0	23	N
Fvb5:76198-76590	IR_5465	Fvb5	76198	76590	393	1629	271	0.725	.	CCGACGACGGCGCUCCUCCACCC	702	67	3	97	61	765	636	23	N
Fvb5:6968012-6968407	IR_5715	Fvb5	6968012	6968407	396	295	82	0.756	.	GAGAAGGGCUGUAUAUAUAUAUA	82	8	10	15	5	136	121	23	N
Fvb5:11292165-11292614	IR_5891	Fvb5	11292165	11292614	450	44	28	0.409	.	UAGGAACUGUAUAUAUAUAUAUA	8	1	0	0	4	20	19	23	N
Fvb5:14785082-14785453	IR_6052	Fvb5	14785082	14785453	372	18	9	0.333	.	UUUAGUUUGACAUAAGCUGGACU	7	0	0	3	1	8	6	23	N
Fvb5:15684674-15685010	IR_6103	Fvb5	15684674	15685010	337	3	3	0.667	.	GUUUUUCGAUUUUGAGGGCCUUA	1	0	0	0	0	2	1	23	N
Fvb5:16413233-16413603	IR_6122	Fvb5	16413233	16413603	371	1	1	0	-	UUGAGAGAACGAAGAUUGAAAUU	1	0	0	0	0	1	0	23	N
Fvb5:17370153-17370603	IR_6178	Fvb5	17370153	17370603	451	1	1	1	+	ACUUGCUCUUUAACAAAAUGGAU	1	0	0	0	0	1	0	23	N
Fvb5:19076076-19076490	IR_6258	Fvb5	19076076	19076490	415	39	15	0.769	.	CCGACGACGGCGCUCCUCCACCC	25	1	1	5	0	26	6	23	N
Fvb5:19900913-19901195	IR_6292	Fvb5	19900913	19901195	283	10	8	0.3	.	UAGAAAAGAACGGACUCGCCAGG	2	0	0	0	2	4	4	23	N
Fvb5:20090881-20091360	IR_6304	Fvb5	20090881	20091360	480	3	3	0	-	UACAUUCAACGUACUCAAAAUCGA	1	0	0	0	0	2	1	23	N
Fvb5:20444609-20444968	IR_6326	Fvb5	20444609	20444968	360	2	2	0	-	UGUUCGCACCAAUGGUUUUGGUA	1	0	0	0	0	1	1	23	N
Fvb5:21910948-21911102	IR_6418	Fvb5	21910948	21911102	155	1	1	0	-	AUAAGUCGUCGGCUAUAGUCCGG	1	0	0	0	0	1	0	23	N
Fvb5:21914910-21915303	IR_6420	Fvb5	21914910	21915303	394	49	22	0.776	.	UCGGCGGAGUCGCCGGAGAUGGA	13	1	1	2	7	19	19	23	N
Fvb5:23325282-23325760	IR_6457	Fvb5	23325282	23325760	479	31	19	0.71	.	AGGGCCCUGUAUAUAUAUAUAUA	5	3	2	3	2	11	10	23	N
Fvb5:24727140-24727340	IR_6518	Fvb5	24727140	24727340	201	1	1	0	-	AGGAAAAUUUCGUCGGCUAAAGU	1	0	0	0	0	1	0	23	N
Fvb5:24755334-24756014	IR_6521	Fvb5	24755334	24756014	681	2	2	0	-	UUACUUAACUCACUCACUUUUGAU	1	0	0	0	0	1	1	23	N
Fvb5:27342283-27342485	IR_6657	Fvb5	27342283	27342485	203	3	2	1	+	ACGAAAAAUUGUUUCGUCGGCCU	2	0	0	0	0	2	1	23	N
Fvb6:87985-88419	IR_6743	Fvb6	87985	88419	435	354	53	0.881	+	UGAAAUUUUGUAGAGGUGAUCUA	201	3	1	5	33	210	102	23	N
Fvb6:9157521-9157723	IR_7095	Fvb6	9157521	9157723	203	16	6	0.688	.	ACGAAAAAUUGUUUCGUCGGCCU	10	0	0	0	0	11	5	23	N
Fvb6:13674492-13674691	IR_7297	Fvb6	13674492	13674691	200	2	2	0.5	.	CUUAAAACAUUCUUUAGCCGACA	1	0	0	0	0	1	1	23	N
Fvb6:15205125-15205559	IR_7363	Fvb6	15205125	15205559	435	20	6	0.2	.	GGAAAUUCGAUCGAAAAGUGAUA	14	0	0	0	0	14	6	23	N
Fvb6:16816115-16816388	IR_7455	Fvb6	16816115	16816388	274	1	1	0	-	CUCAAUCACAGAUACCUGAAAGU	1	0	0	0	0	1	0	23	N
Fvb6:18551382-18551801	IR_7561	Fvb6	18551382	18551801	420	35	18	0.914	+	AUCUAGAUCAUCUUGUGUAGAUC	6	1	5	3	3	13	10	23	N
Fvb6:20509662-20510099	IR_7668	Fvb6	20509662	20510099	438	111	22	0.964	+	GAGAAGGGCUGUAUAUAUAUAUA	43	1	4	4	1	59	42	23	N
Fvb6:23394463-23394903	IR_7843	Fvb6	23394463	23394903	441	64	20	0.938	+	GAGAAGGGCUGUAUAUAUAUAUA	40	1	0	7	1	46	9	23	N
Fvb6:25306853-25306993	IR_7942	Fvb6	25306853	25306993	141	1	1	1	+	AUUUAGAGGGCUUUGUUUUCAAA	1	0	0	0	0	1	0	23	N
Fvb6:25645469-25645865	IR_7965	Fvb6	25645469	25645865	397	1172	249	0.171	-	UCCGGCCUGUAUAUAUAUAUAUA	405	53	28	75	43	515	458	23	N
Fvb6:26392371-26392804	IR_8005	Fvb6	26392371	26392804	434	19	11	0.789	.	GAAAAUUCGAUCGAAAAGUGGUA	7	2	0	1	1	9	6	23	N
Fvb6:28625746-28626181	IR_8128	Fvb6	28625746	28626181	436	100	25	0.71	.	AAACAUGAACCGGACAGAAUUCA	45	3	0	1	2	51	43	23	N
Fvb6:30453856-30454258	IR_8211	Fvb6	30453856	30454258	403	5	4	0.6	.	CCGCAGCUGAGAAACUUUAUGUGU	2	0	0	0	1	2	2	23	N
Fvb6:31846104-31846538	IR_8296	Fvb6	31846104	31846538	435	6	5	0	-	UGAGUUUUAGGGUUUUUAUGGAUC	2	0	0	0	0	3	3	23	N
Fvb6:33369471-33369914	IR_8347	Fvb6	33369471	33369914	444	9	9	0.444	.	CUUGGCGUUCGGUAAUGUUUUCAU	1	0	0	1	0	5	3	23	N
Fvb6:34479119-34479513	IR_8394	Fvb6	34479119	34479513	395	412	133	0.197	-	UAUCCGGCCUGUAUAUAUAUAUA	69	20	4	40	23	172	153	23	N
Fvb6:35665071-35665234	IR_8447	Fvb6	35665071	35665234	164	2	1	0	-	UUCCAUUUAGCAAUAUGAACACU	2	0	0	0	0	2	0	23	N
Fvb7:8732191-8732705	IR_8910	Fvb7	8732191	8732705	515	237	62	0.954	+	AAGAAGGACUAACAUGAUAAUCA	75	2	3	4	40	101	87	23	N
Fvb7:9790532-9790955	IR_8953	Fvb7	9790532	9790955	424	2	2	0	-	AAAGAUCUGUUGCCUCUGGAUCUU	1	0	0	0	0	1	1	23	N
Fvb7:11432906-11433361	IR_9037	Fvb7	11432906	11433361	456	135	31	0.704	.	AGGGGACUGUAUAUAUAUAUAUA	61	0	3	7	1	73	51	23	N
Fvb7:13160364-13160723	IR_9102	Fvb7	13160364	13160723	360	57	38	0.368	.	GAGAAGGGCUGUAUAUAUAUAUC	8	2	0	4	2	25	24	23	N
Fvb7:14654086-14654784	IR_9171	Fvb7	14654086	14654784	699	9	8	1	+	GAUGAGAGCUGCAGAGAGAGAUC	2	1	0	1	2	4	1	23	N
Fvb7:15341483-15341653	IR_9190	Fvb7	15341483	15341653	171	12	11	0.667	.	AAAAUAAUUUCGUCGGCUAUAGU	2	0	1	2	0	6	3	23	N
Fvb7:21010000-21010502	IR_9360	Fvb7	21010000	21010502	503	107	41	0.981	+	AAAUCAGAUUGAGAAUUCCUAAU	25	2	4	14	22	49	16	23	N
contig_11:5343-5789	IR_9458	contig_11	5343	5789	447	61	33	0.656	.	UGCGUUUUUCUGUUAUAAACAGGA	10	1	0	5	4	8	43	24	N
contig_11:7559-7712	IR_9459	contig_11	7559	7712	154	47	21	0.83	+	AUUAUUUCGUCGGCUAAAGUCCGG	23	5	0	1	3	7	31	24	N
contig_11:12787-13328	IR_9460	contig_11	12787	13328	542	4	3	0.75	.	AUUCGUCGGCUAUAGUAUUUUAGC	2	0	0	0	0	1	3	24	N
contig_14:2635-3070	IR_9461	contig_14	2635	3070	436	37	32	0.703	.	ACCCACCUGACUGCAUGAUAUCUG	2	0	2	0	1	4	30	24	N
contig_19:10286-10727	IR_9462	contig_19	10286	10727	442	23	20	0.478	.	ACCCACCUGACUGCAUGAUAUCUG	3	1	0	2	0	3	17	24	N
contig_21:19598-20063	IR_9463	contig_21	19598	20063	466	148	49	0.973	+	GAUGAUGAACCGGACAGAAUUCAG	19	7	6	20	5	20	90	24	N
contig_21:39173-39866	IR_9464	contig_21	39173	39866	694	40	35	0.425	.	AAAUUUUGGUCGAGAUAAGAACAU	2	3	2	0	1	4	30	24	N
contig_21:40021-40614	IR_9465	contig_21	40021	40614	594	60	27	0.233	.	AUAAUGAGAAAUUCGUCGUAACGG	19	10	0	0	0	6	44	24	N
contig_21:43442-43834	IR_9466	contig_21	43442	43834	393	13	13	0.538	.	UUGGAAAAAACGGACUCGCCC	1	1	0	1	0	2	9	24	N
contig_5:8144-8566	IR_9468	contig_5	8144	8566	423	61	30	0.623	.	GAAUAAAUAAGGAUAUUUGGACCU	11	2	1	5	0	5	48	24	N
contig_5:8618-8900	IR_9469	contig_5	8618	8900	283	7906	898	0.025	-	CGGGGAAGGAAAGUGAUCGGGAAC	1659	796	740	879	570	806	4115	24	N
contig_6:8019-8453	IR_9470	contig_6	8019	8453	435	14	10	0.5	.	CCACCCACCUGACUGCAUGAUAUC	2	0	0	1	0	1	12	24	N
contig_8:20648-21086	IR_9471	contig_8	20648	21086	439	89	39	0.629	.	AAUUACAUACUAUAGCCGACGAAA	16	0	2	0	3	5	79	24	N
contig_8:26238-26392	IR_9472	contig_8	26238	26392	155	9	5	1	+	GUCGGCUAAAGUGUGGACUAUAGC	3	1	0	0	0	0	8	24	N
Fvb1:31082-31415	IR_1	Fvb1	31082	31415	334	377	197	0.464	.	AGGCCGGAUGUGGAGCGCACGUGC	41	26	4	30	26	37	254	24	N
Fvb1:33582-33970	IR_2	Fvb1	33582	33970	389	31	13	0.968	+	AAAGUGUAGGGACUAACAUGAAGU	8	0	0	2	0	8	21	24	N
Fvb1:43090-43398	IR_3	Fvb1	43090	43398	309	314	163	0.414	.	CAUUCUAACACCGUCGGGGGA	24	21	0	74	44	33	142	24	N
Fvb1:57399-57822	IR_4	Fvb1	57399	57822	424	691	248	0.812	+	AUAUACCUGAACCGGACAAAAUUC	81	38	9	72	39	81	452	24	N
Fvb1:57824-58525	IR_5	Fvb1	57824	58525	702	661	295	0.676	.	AACAAAAUUCAUUCCGUCAGAUUU	47	46	13	50	34	75	443	24	N
Fvb1:72805-73160	IR_6	Fvb1	72805	73160	356	79	48	0.354	.	AGUCAAUCUGGCCGGAAAACUGGA	13	4	0	3	2	6	64	24	N
Fvb1:73172-73584	IR_7	Fvb1	73172	73584	413	198	78	0.783	.	AUACGGAUUUUCUCAGCUGCGGAC	15	14	2	8	26	20	128	24	N
Fvb1:73585-74053	IR_8	Fvb1	73585	74053	469	690	243	0.51	.	GAUGUGGAAAUACGACCUGAAAGU	90	30	4	43	98	104	411	24	N
Fvb1:93251-93692	IR_9	Fvb1	93251	93692	442	89	42	0.742	.	UCGAAAAACAAAUGGACGGACUGA	13	0	1	4	4	23	57	24	N
Fvb1:150331-150761	IR_10	Fvb1	150331	150761	431	579	185	0.769	.	UUGAUGAUCGUUAAGGUGCUC	109	12	8	142	60	44	313	24	N
Fvb1:152371-152797	IR_11	Fvb1	152371	152797	427	3206	311	0.789	.	ACACAACCGGACAGAAUUCAGUCC	1018	39	25	145	103	193	2701	24	N
Fvb1:214803-215233	IR_12	Fvb1	214803	215233	431	743	204	0.661	.	CCAAUUUGGUGAUCGUUAAGGCCC	124	62	13	71	34	72	491	24	N
Fvb1:226995-227322	IR_13	Fvb1	226995	227322	328	30	25	0.5	.	AUUAGACUUUGGACGUUGUUGGCU	4	0	0	1	0	5	24	24	N
Fvb1:231804-232203	IR_14	Fvb1	231804	232203	400	152	89	0.362	.	AAAUGCGGACAUCCACACCUGAGA	15	4	4	7	6	30	101	24	N
Fvb1:253178-253605	IR_15	Fvb1	253178	253605	428	508	193	0.457	.	AGCGCCGUCGCAACGGCCGGGGGA	46	13	3	30	52	68	342	24	N
Fvb1:261872-262088	IR_16	Fvb1	261872	262088	217	268	95	0.44	.	AUAUGAUAGUCUUGGCAAAGAACC	40	9	3	14	3	28	211	24	N
Fvb1:277209-277723	IR_17	Fvb1	277209	277723	515	252	98	0.615	.	AUCCAAUUCCUCUGUCAAGUGAUG	35	11	1	17	3	40	180	24	N
Fvb1:323656-323814	IR_18	Fvb1	323656	323814	159	1299	258	0.5	.	AUCGAAAAACAAAUCUGACGGACU	194	66	20	155	84	202	772	24	N
Fvb1:381220-381694	IR_19	Fvb1	381220	381694	475	92	42	0.141	-	CUGAGAAGCGCUGUAUAUAUAUAU	11	6	3	3	8	25	47	24	N
Fvb1:394403-394790	IR_20	Fvb1	394403	394790	388	581	180	0.225	.	AAACGGAAUAUGAGAAUUUAGGCA	86	11	5	18	11	59	477	24	N
Fvb1:434814-435169	IR_21	Fvb1	434814	435169	356	1051	248	0.478	.	AGGACCACGUUAGACUGUCACAUG	112	35	15	30	19	95	857	24	N
Fvb1:759197-759891	IR_25	Fvb1	759197	759891	695	57	41	0.842	+	AACCUGCUUUGACCUGCCUUGCCC	10	4	0	5	0	3	45	24	N
Fvb1:777632-777803	IR_26	Fvb1	777632	777803	172	21	17	0.476	.	UGCUGGAGUCUUCUGGGGUGG	5	0	1	6	0	3	11	24	N
Fvb1:859964-860274	IR_28	Fvb1	859964	860274	311	581	144	0.806	+	AGUCCUUGUGGUUUGAAGUCGACA	186	27	13	10	4	44	483	24	N
Fvb1:974818-975475	IR_30	Fvb1	974818	975475	658	516	219	0.721	.	AUGACAACAACAAGAACUUCGAGU	53	15	10	11	11	83	386	24	N
Fvb1:1050984-1051407	IR_32	Fvb1	1050984	1051407	424	2657	596	0.367	.	AACGGGACACCACUCUGGAAUGAA	272	90	24	45	43	378	2077	24	N
Fvb1:1100368-1100773	IR_33	Fvb1	1100368	1100773	406	27	24	0.333	.	AGAAAAGUUAGGGUAGCACAUUGG	2	1	1	1	0	3	21	24	N
Fvb1:1101620-1101961	IR_34	Fvb1	1101620	1101961	342	20	18	0.45	.	UCAAUUACUAAAAUGGAGGGCGAU	2	1	0	1	1	1	16	24	N
Fvb1:1198137-1198835	IR_35	Fvb1	1198137	1198835	699	81	60	0.667	.	AGAGAUACUGGCCGAACAAACAAG	5	1	0	2	4	15	59	24	N
Fvb1:1199799-1200186	IR_36	Fvb1	1199799	1200186	388	1488	356	0.792	.	ACGGAAUAUGAGAAUUUGGGCACG	72	96	18	47	30	199	1098	24	N
Fvb1:1258345-1258635	IR_37	Fvb1	1258345	1258635	291	10	9	0.2	.	UACACUAUAAUUCAUCGGCUAAGA	2	0	0	0	0	0	10	24	N
Fvb1:1291824-1292326	IR_38	Fvb1	1291824	1292326	503	41	31	0.39	.	CUACGGUUCAGGAUUAACAGAUUC	5	0	1	2	0	5	33	24	N
Fvb1:1292351-1292745	IR_39	Fvb1	1292351	1292745	395	42	35	0.595	.	AGGCCGGAUCAGAGGCGGACGUCC	3	0	1	2	3	4	32	24	N
Fvb1:1292746-1293159	IR_40	Fvb1	1292746	1293159	414	51	35	0.078	-	AUAAAUACGGAUAGUUGGACCUGA	5	1	1	3	1	8	37	24	N
Fvb1:1293160-1293581	IR_41	Fvb1	1293160	1293581	422	24	15	0.333	.	AGCUAAUUUGAUGAUCGUUAAGGC	5	0	1	1	0	2	20	24	N
Fvb1:1371559-1371771	IR_42	Fvb1	1371559	1371771	213	28	23	0.393	.	AUAGAUUGUUGUAUUUGUUCAAGG	5	0	0	1	0	3	24	24	N
Fvb1:1436393-1436774	IR_43	Fvb1	1436393	1436774	382	98	79	0.388	.	AGAGACGGACGUCCGCAAUGAAGA	5	10	0	7	3	17	61	24	N
Fvb1:1473569-1473972	IR_44	Fvb1	1473569	1473972	404	450	182	0.66	.	GAGGACUUUUUGGCUUAUCCCACU	19	14	10	3	18	69	336	24	N
Fvb1:1552762-1553170	IR_45	Fvb1	1552762	1553170	409	287	99	0.923	+	AAACCGGAAAAGAAUGGACUUGCC	88	40	6	26	33	18	164	24	N
Fvb1:1564401-1564598	IR_46	Fvb1	1564401	1564598	198	889	219	0.918	+	CCUGACCACUGUCCAUCCUCGGCG	237	76	28	76	50	43	616	24	N
Fvb1:1924529-1925006	IR_47	Fvb1	1924529	1925006	478	249	134	0.602	.	AACCGUCAGCCGGUCGUACAGACA	27	15	1	9	10	22	192	24	N
Fvb1:1961629-1962121	IR_48	Fvb1	1961629	1962121	493	608	275	0.587	.	GAUCUGUAGUUUAACAAUGGACUA	37	8	8	12	9	100	471	24	N
Fvb1:1992613-1993026	IR_50	Fvb1	1992613	1993026	414	848	214	0.158	-	CAAAUCUGCCAAACCUGAACCGUU	318	20	5	21	15	63	724	24	N
Fvb1:2000333-2000764	IR_51	Fvb1	2000333	2000764	432	389	177	0.383	.	UAAGUUUGGCUAGUCUGCUGGAGC	60	24	13	20	7	52	273	24	N
Fvb1:2099517-2100153	IR_52	Fvb1	2099517	2100153	637	578	234	0.638	.	AAUGCUCCCGAAGGACCACGUGAC	44	38	9	24	20	78	409	24	N
Fvb1:2119082-2119510	IR_53	Fvb1	2119082	2119510	429	3659	557	0.403	.	AGAGAAUCCGGAUGUACACGUACA	306	103	46	127	61	628	2694	24	N
Fvb1:2135774-2136198	IR_54	Fvb1	2135774	2136198	425	1527	477	0.521	.	ACUGAACGGUCAAUAUGUAGAUAU	115	79	23	38	38	260	1089	24	N
Fvb1:2198684-2199002	IR_55	Fvb1	2198684	2199002	319	985	257	0.372	.	AUCCAACGAUGACUGAUCAUGAAU	98	26	18	29	22	155	735	24	N
Fvb1:2230930-2231264	IR_56	Fvb1	2230930	2231264	335	742	332	0.47	.	AAAAGAUUGGACUCACCGGAGAGG	53	39	5	104	37	82	475	24	N
Fvb1:2245106-2245803	IR_57	Fvb1	2245106	2245803	698	983	344	0.445	.	GAAGAUACAAUUUUGCCUGUGGAC	70	24	20	25	18	177	719	24	N
Fvb1:2264028-2264454	IR_58	Fvb1	2264028	2264454	427	799	237	0.66	.	CAUUAACCGGACAGAAUUCAGUUC	73	43	33	79	55	124	465	24	N
Fvb1:2311162-2311543	IR_60	Fvb1	2311162	2311543	382	297	152	0.522	.	AAUCAUGAGACUGUUAACUUUCA	19	14	3	13	7	50	210	24	N
Fvb1:2336657-2337069	IR_61	Fvb1	2336657	2337069	413	742	171	0.682	.	GAGGACCUUUAAGUUGAUGACUAG	308	9	16	8	16	61	632	24	N
Fvb1:2362714-2363068	IR_62	Fvb1	2362714	2363068	355	51	29	0.373	.	AAAUCAACGAACGGACCAUAAAUC	7	1	1	0	0	2	47	24	N
Fvb1:2373340-2373541	IR_64	Fvb1	2373340	2373541	202	1459	256	0.564	.	CAAAACUUUGAUCCAACGUACUGU	270	86	16	36	22	154	1145	24	N
Fvb1:2419781-2420056	IR_66	Fvb1	2419781	2420056	276	42	22	0.31	.	AGAGAACAUAUGAUAUCCCCGACA	8	4	0	1	2	3	32	24	N
Fvb1:2430026-2430498	IR_67	Fvb1	2430026	2430498	473	154	84	0.61	.	UUUUCCGUCCGGAUUUCUGCCGUU	18	4	1	12	4	10	123	24	N
Fvb1:2430540-2430964	IR_68	Fvb1	2430540	2430964	425	103	55	0.748	.	AUUCUGUCGAACCUAAACCGUUUA	7	4	2	1	4	10	82	24	N
Fvb1:2431366-2431862	IR_69	Fvb1	2431366	2431862	497	142	45	0.852	+	UGAACCGGACAGAAUUCAGUC	52	1	3	55	1	23	59	24	N
Fvb1:2431918-2432226	IR_70	Fvb1	2431918	2432226	309	321	118	0.386	.	AAACUGGAAUUCGGCGAACUCGCC	70	24	3	36	29	16	213	24	N
Fvb1:2432555-2433252	IR_71	Fvb1	2432555	2433252	698	346	170	0.662	.	AGAUCCGGACUAUAUAUAUAUAUG	25	15	2	15	18	65	231	24	N
Fvb1:2435265-2435962	IR_72	Fvb1	2435265	2435962	698	118	58	0.458	.	AUUGUGUCUUAUGUUAAAUGUAGA	28	5	2	7	3	8	93	24	N
Fvb1:2438334-2438738	IR_73	Fvb1	2438334	2438738	405	86	55	0.326	.	AGCUUCGCUCUGGAUAUGAACUAU	10	2	2	0	1	8	73	24	N
Fvb1:2438912-2439603	IR_74	Fvb1	2438912	2439603	692	22	19	0.545	.	GAAGCUUCGCUCUGAAUAAGAACU	2	0	1	0	1	1	19	24	N
Fvb1:2446793-2447384	IR_75	Fvb1	2446793	2447384	592	74	58	0.176	-	CUUGGCCUGUAGAAACAACUGGGU	3	6	2	9	3	12	42	24	N
Fvb1:2451892-2452339	IR_76	Fvb1	2451892	2452339	448	236	132	0.297	.	UGACGGAGGAAUUGAAUGAAGAAU	21	13	6	9	9	48	151	24	N
Fvb1:2463311-2463731	IR_77	Fvb1	2463311	2463731	421	123	65	0.585	.	UUUUCCGUCCGGAUUUCUGCCGUU	17	2	1	4	0	7	109	24	N
Fvb1:2490492-2491187	IR_78	Fvb1	2490492	2491187	696	130	90	0.477	.	CAUCAAUCUUGACUAAAAUGACU	9	7	6	8	9	28	72	24	N
Fvb1:2502652-2503035	IR_79	Fvb1	2502652	2503035	384	401	138	0.546	.	AAACGGAAUAUGAGAAUUUGGGCA	34	8	4	18	12	46	313	24	N
Fvb1:2551948-2552360	IR_80	Fvb1	2551948	2552360	413	213	117	0.385	.	AGUUAACGUUCGAUUUGGACAGGA	10	8	8	9	8	30	150	24	N
Fvb1:2587428-2587891	IR_81	Fvb1	2587428	2587891	464	509	175	0.637	.	ACAAGGACUAAACAAAUGUGGACU	69	19	9	11	15	70	385	24	N
Fvb1:2619385-2619966	IR_82	Fvb1	2619385	2619966	582	176	108	0.489	.	UUUGACACCAAAGAUUAGGGGGGU	13	5	9	6	4	31	121	24	N
Fvb1:2693944-2694394	IR_85	Fvb1	2693944	2694394	451	81	58	0.704	.	ACAUAAUUCUGUCGAACUUGAACC	8	0	4	2	2	21	52	24	N
Fvb1:2706572-2707070	IR_86	Fvb1	2706572	2707070	499	11	10	0.545	.	GUGUGUGAGUUCGUCUGUAUGUCU	2	1	0	0	0	1	9	24	N
Fvb1:2743595-2744013	IR_87	Fvb1	2743595	2744013	419	582	90	0.175	-	ACACAACCGGACAGAAUUCAAUCC	371	3	3	20	1	31	524	24	N
Fvb1:2860110-2860485	IR_89	Fvb1	2860110	2860485	376	126	78	0.524	.	AUGUUUAUAACAGAAAAUCGCAGU	12	0	2	2	3	15	104	24	N
Fvb1:2957408-2958106	IR_90	Fvb1	2957408	2958106	699	85	73	0.318	.	AAUAAGAUCGAGAAGAAUACU	3	2	1	21	21	9	31	24	N
Fvb1:2978556-2979254	IR_91	Fvb1	2978556	2979254	699	35	23	0.257	.	GAGAAUGAUUUAACAAGUGACAUG	10	1	0	3	1	2	28	24	N
Fvb1:3077749-3078169	IR_92	Fvb1	3077749	3078169	421	84	55	0.56	.	AACGAGGGAUCCCUAUUUUAAGCU	7	1	1	9	2	10	61	24	N
Fvb1:3135252-3135630	IR_93	Fvb1	3135252	3135630	379	904	146	0.858	+	AAACAGAUCCAAUGGUGUAGACCU	182	12	6	10	7	89	780	24	N
Fvb1:3135653-3136094	IR_94	Fvb1	3135653	3136094	442	282	105	0.706	.	ACUCGAAAAACAAAUGGACGGACU	48	9	6	16	4	42	205	24	N
Fvb1:3136103-3136535	IR_95	Fvb1	3136103	3136535	433	117	64	0.607	.	AUCCCUCAUAUAAGUCAUAAUAAG	25	5	0	6	5	12	89	24	N
Fvb1:3373662-3374071	IR_99	Fvb1	3373662	3374071	410	950	200	0.844	+	ACAUGAACCGGACAGAAUUCAGUC	424	29	16	23	23	183	676	24	N
Fvb1:3374073-3374449	IR_100	Fvb1	3374073	3374449	377	608	251	0.635	.	GUCCUGGAAGCCUGUGCUGUCGUC	47	25	5	38	25	66	449	24	N
Fvb1:3393387-3393567	IR_101	Fvb1	3393387	3393567	181	5	5	0.4	.	GGAGGGUGGGGAGCAAAUGG	1	1	0	1	0	0	3	24	N
Fvb1:3421209-3421626	IR_102	Fvb1	3421209	3421626	418	479	154	0.701	.	AAGUGUAGGGACUAACAUGAAGUC	39	21	1	12	11	92	342	24	N
Fvb1:3466445-3466922	IR_103	Fvb1	3466445	3466922	478	288	123	0.545	.	GCCAAUUUGGUAAUCGUUAAGGCC	30	9	4	24	33	44	174	24	N
Fvb1:3473195-3473588	IR_104	Fvb1	3473195	3473588	394	63	47	0.444	.	AAGAGAAGGGACGUCGUCGGCGCU	5	2	0	6	3	6	46	24	N
Fvb1:3489779-3490476	IR_105	Fvb1	3489779	3490476	698	104	61	0.51	.	AUUUCCACUUCGCUUGGUAGUCUG	12	2	0	3	0	13	86	24	N
Fvb1:3525496-3526036	IR_106	Fvb1	3525496	3526036	541	1181	493	0.333	.	AAAAGGUGAGACACUGUUUGGACC	103	62	19	44	52	198	806	24	N
Fvb1:3590192-3590882	IR_107	Fvb1	3590192	3590882	691	74	65	0.365	.	UUGGACCGCCAUGACCCUCAUAGG	3	5	1	6	4	10	48	24	N
Fvb1:3606655-3607353	IR_108	Fvb1	3606655	3607353	699	29	25	0.345	.	CUAUUUUUUAUUAAAUUCCCGAGA	3	1	0	2	0	5	21	24	N
Fvb1:3625510-3625767	IR_109	Fvb1	3625510	3625767	258	1123	383	0.634	.	UUCCCGGACGACAGCACAGGC	104	113	14	244	108	98	546	24	N
Fvb1:3645045-3645330	IR_110	Fvb1	3645045	3645330	286	373	104	0.936	+	AGCCUGUGCUGUCGUCCGGGAAGG	141	3	1	39	26	42	262	24	N
Fvb1:3645368-3645821	IR_111	Fvb1	3645368	3645821	454	74	46	0.595	.	UAGGGAUAUGGCAUUACACCAACU	16	3	0	4	2	7	58	24	N
Fvb1:3646887-3647062	IR_112	Fvb1	3646887	3647062	176	350	125	0.394	.	UUGACGGAAUAACCAUUUGGAUGA	26	10	4	10	7	47	272	24	N
Fvb1:3775868-3776566	IR_113	Fvb1	3775868	3776566	699	665	226	0.505	.	AAGGAGGACUAUUAGGCAUGCUAA	100	21	12	18	25	83	506	24	N
Fvb1:3793661-3793943	IR_114	Fvb1	3793661	3793943	283	197	113	0.594	.	ACGGUGCGCCUCCACCCCAAAGGA	12	6	0	18	18	31	124	24	N
Fvb1:3834989-3835367	IR_115	Fvb1	3834989	3835367	379	235	111	0.536	.	AUACUGCCACGUGGUUAUCUCGUA	22	9	2	10	3	31	180	24	N
Fvb1:3857716-3858314	IR_116	Fvb1	3857716	3858314	599	70	57	0.529	.	AUCAUUGGUCUGAGUAGAUAGUCU	5	6	0	2	0	11	51	24	N
Fvb1:3869956-3870264	IR_117	Fvb1	3869956	3870264	309	528	216	0.422	.	AUAUGAACUCCUACUGACCCCAGU	43	26	5	42	21	65	369	24	N
Fvb1:3923513-3923926	IR_118	Fvb1	3923513	3923926	414	706	222	0.693	.	GAUGAAAAUAAAAGUGUAGGGACU	41	16	7	23	13	63	584	24	N
Fvb1:3947773-3948055	IR_119	Fvb1	3947773	3948055	283	253	136	0.628	.	AAAUUACCAGAAAAACAAGAGCUC	28	7	3	7	5	36	195	24	N
Fvb1:3951923-3952295	IR_120	Fvb1	3951923	3952295	373	62	41	0.548	.	AUUCCGGCUUAAAGUGCAGACUUC	7	5	0	6	7	1	43	24	N
Fvb1:3971172-3971548	IR_121	Fvb1	3971172	3971548	377	358	166	0.207	.	AAACCGGACGGAAUUUUAGUAAUU	28	8	5	17	16	66	246	24	N
Fvb1:3994755-3995234	IR_122	Fvb1	3994755	3995234	480	380	145	0.518	.	AAAGCCUUAACGAUCACCAAA	55	8	0	69	16	75	212	24	N
Fvb1:3996084-3996781	IR_123	Fvb1	3996084	3996781	698	135	88	0.533	.	AUAGUGUUUGGUAAAUGAAAGAUU	10	3	2	2	0	7	121	24	N
Fvb1:4026489-4026881	IR_124	Fvb1	4026489	4026881	393	1	1	1	+	UUGAGGAUCAUGAUAUUUUAAGAU	1	0	0	0	0	0	1	24	N
Fvb1:4032496-4032690	IR_125	Fvb1	4032496	4032690	195	46	33	0.283	.	AGAUGAUGUAGAAGCUUUAGACU	6	5	1	1	2	9	28	24	N
Fvb1:4090170-4090488	IR_126	Fvb1	4090170	4090488	319	499	192	0.649	.	AGUCCUUGUGGUUUGAAGUCGAUA	29	13	5	14	6	55	406	24	N
Fvb1:4142363-4142715	IR_127	Fvb1	4142363	4142715	353	880	393	0.522	.	AGAUUUCCGUCCUUUUGCCACUGU	38	48	4	59	68	115	586	24	N
Fvb1:4187497-4187920	IR_128	Fvb1	4187497	4187920	424	290	102	0.545	.	AUGAGGGAGCCUUUCUAGUGAGGA	34	1	1	4	8	44	232	24	N
Fvb1:4193064-4193500	IR_129	Fvb1	4193064	4193500	437	134	89	0.455	.	GAGAAUCUCUGUAUAUGUAUGUGU	9	6	2	10	16	13	87	24	N
Fvb1:4193528-4193818	IR_130	Fvb1	4193528	4193818	291	98	58	0.296	.	CCGGAAAACUGCAAUUUGGCGG	15	11	2	21	24	8	32	24	N
Fvb1:4193539-4194195	IR_131	Fvb1	4193539	4194195	657	670	212	0.531	.	AAAACUGGAAUUCAGCGGACUCGC	180	28	10	68	41	39	484	24	N
Fvb1:4194248-4194675	IR_132	Fvb1	4194248	4194675	428	67	25	0.433	.	CGAGAAGGGCUGUGUGUAUAUAUA	10	1	0	4	0	11	51	24	N
Fvb1:4324066-4324716	IR_133	Fvb1	4324066	4324716	651	886	264	0.669	.	AAACAACAAGGAUUGAACUUCUGU	120	36	13	37	21	180	599	24	N
Fvb1:4337754-4338051	IR_134	Fvb1	4337754	4338051	298	101	65	0.495	.	GAGGACUCAAUUACCACUUUAAAG	11	1	3	2	2	14	79	24	N
Fvb1:4357694-4358036	IR_135	Fvb1	4357694	4358036	343	80	44	0.713	.	AAACGGACUGAUAUACAUGUAUAU	11	3	1	14	1	11	50	24	N
Fvb1:4358050-4358442	IR_136	Fvb1	4358050	4358442	393	216	109	0.81	+	AAACUGGAAUUCGGCGGACUCACC	15	11	0	32	21	26	126	24	N
Fvb1:4452431-4452766	IR_137	Fvb1	4452431	4452766	336	77	42	0.688	.	AAUGAUCGUUAAGGCCCUCAAACU	13	4	1	11	4	7	50	24	N
Fvb1:4452835-4453269	IR_138	Fvb1	4452835	4453269	435	164	57	0.372	.	AGCUAAUUUGGUAAUCGUUAAGGC	36	3	2	7	1	12	139	24	N
Fvb1:4453271-4453671	IR_139	Fvb1	4453271	4453671	401	108	48	0.87	+	ACUAAUGUAUAGAUCAUCUCUGCA	11	1	1	3	3	9	91	24	N
Fvb1:4454036-4454514	IR_140	Fvb1	4454036	4454514	479	189	77	0.434	.	AAUAUUGUGUAGAUCAUCUCU	24	4	1	60	7	15	102	24	N
Fvb1:4477640-4477890	IR_141	Fvb1	4477640	4477890	251	1282	411	0.628	.	AGUUCUUGUGGUUUGAAGUCGACA	73	54	14	56	32	264	862	24	N
Fvb1:4536672-4536997	IR_142	Fvb1	4536672	4536997	326	76	54	0.408	.	UCUCUGCUACGGACGUCUGUACGA	5	3	0	15	3	11	44	24	N
Fvb1:4540693-4540890	IR_143	Fvb1	4540693	4540890	198	98	40	0.694	.	ACUGGAAUUCGGCGGACUCGC	24	3	0	28	7	17	43	24	N
Fvb1:4540955-4541379	IR_144	Fvb1	4540955	4541379	425	82	32	0.829	+	ACUCGAAAAACAAAUGGACGGACU	39	1	2	5	0	7	67	24	N
Fvb1:4604408-4604883	IR_145	Fvb1	4604408	4604883	476	585	164	0.381	.	ACAUAAACCGGACAGAAUUCAGUC	196	19	17	34	16	58	441	24	N
Fvb1:4614534-4614789	IR_147	Fvb1	4614534	4614789	256	22	12	0.273	.	UUGAGGACUCAAUUUACAAAGUUU	4	0	0	0	0	6	16	24	N
Fvb1:4683753-4684438	IR_149	Fvb1	4683753	4684438	686	237	164	0.468	.	AUUGUGGACGGCGCUGACGAAGAU	7	20	2	33	16	33	133	24	N
Fvb1:4685968-4686103	IR_150	Fvb1	4685968	4686103	136	3	2	0.667	.	AUAUUUAAGCGGCAGUUAUCCUGC	2	0	0	0	0	0	3	24	N
Fvb1:4686445-4686635	IR_151	Fvb1	4686445	4686635	191	102	59	0.5	.	UCAACUGCCGUCGGAUCUGCUCGA	9	7	3	7	1	12	72	24	N
Fvb1:4710347-4711042	IR_152	Fvb1	4710347	4711042	696	680	395	0.556	.	UUAUCGUUGCUUUGCUUUGAGCCU	46	26	10	23	17	142	462	24	N
Fvb1:4786709-4787407	IR_153	Fvb1	4786709	4787407	699	836	305	0.681	.	CAUAGUUGCGCACCACUUACGGAC	55	48	10	52	27	128	571	24	N
Fvb1:4794015-4794436	IR_154	Fvb1	4794015	4794436	422	451	241	0.51	.	AGUCUGUGCUGUCGUCCGGGAAGA	23	36	5	54	55	57	244	24	N
Fvb1:4799493-4799907	IR_155	Fvb1	4799493	4799907	415	147	74	0.714	.	UAAGAUAUGAACGGUGGAGAUG	17	5	0	8	32	13	89	24	N
Fvb1:4836562-4837004	IR_156	Fvb1	4836562	4837004	443	58	31	0.483	.	AACGGUAUCUGAUGUUUCCAUCUC	10	3	0	2	3	5	45	24	N
Fvb1:4840864-4841070	IR_157	Fvb1	4840864	4841070	207	28	23	0.75	.	AAGCCAUUCUGCCGUCGCAAAAG	2	2	0	1	1	4	20	24	N
Fvb1:4924269-4924638	IR_158	Fvb1	4924269	4924638	370	787	353	0.591	.	AAGACUGAACUGAUUUUGCCACCA	29	27	9	77	42	149	483	24	N
Fvb1:4927242-4927651	IR_159	Fvb1	4927242	4927651	410	510	258	0.496	.	AUCCGCACCGUAAAACGGUACAGA	29	19	3	69	64	55	300	24	N
Fvb1:4927652-4928048	IR_160	Fvb1	4927652	4928048	397	1095	281	0.466	.	ACACAACCGGACAGAACUCAGUUC	227	52	43	95	35	163	707	24	N
Fvb1:4933806-4934254	IR_161	Fvb1	4933806	4934254	449	120	64	0.325	.	ACGGAUGUCAGCAGCCGAGAAGGC	17	3	0	19	4	14	80	24	N
Fvb1:4974332-4975030	IR_162	Fvb1	4974332	4975030	699	146	55	0.651	.	AUUGAUAAGAAUAGUCGUCGUUCU	14	1	3	3	2	26	111	24	N
Fvb1:5076672-5077065	IR_163	Fvb1	5076672	5077065	394	213	108	0.54	.	AAAACUUGAAUUCGGCGGACUCGC	35	6	1	12	11	20	163	24	N
Fvb1:5077066-5077468	IR_164	Fvb1	5077066	5077468	403	612	217	0.394	.	ACAUAAUUCUGUCGAACUUGAACC	120	13	8	24	13	97	457	24	N
Fvb1:5113517-5113809	IR_165	Fvb1	5113517	5113809	293	26	12	0.462	.	AAGGACCAUUUAGAUUAAAAUAAA	10	1	0	0	0	0	25	24	N
Fvb1:5290949-5291647	IR_167	Fvb1	5290949	5291647	699	82	57	0.451	.	AGGCACGUUGUGAUUCUGAUGACU	10	2	2	4	2	13	59	24	N
Fvb1:5321531-5321956	IR_168	Fvb1	5321531	5321956	426	1296	333	0.519	.	GUGAGGACCCUUAAGUUGAGGACU	112	33	9	33	17	224	980	24	N
Fvb1:5376824-5377202	IR_169	Fvb1	5376824	5377202	379	72	47	0.486	.	AAAACUGGAAUUUGGCGGACUCGC	6	2	1	9	12	11	37	24	N
Fvb1:5377211-5377573	IR_170	Fvb1	5377211	5377573	363	138	79	0.58	.	UUGUCGCCGGCCAGUCCUGGA	12	17	1	28	11	22	59	24	N
Fvb1:5377573-5378274	IR_171	Fvb1	5377573	5378274	702	205	72	0.79	.	AAACAGAUCUAAUGGUGUGGGCCU	72	4	2	2	7	19	171	24	N
Fvb1:5383036-5383696	IR_172	Fvb1	5383036	5383696	661	389	144	0.329	.	AACGGAGAAUGUAACGGUAUGUAC	77	11	6	8	5	41	318	24	N
Fvb1:5423701-5423955	IR_173	Fvb1	5423701	5423955	255	2	2	0	-	CUAGAAGGAAGUUUGAAGAAAUCU	1	0	0	0	0	0	2	24	N
Fvb1:5450226-5450683	IR_174	Fvb1	5450226	5450683	458	11	7	0.636	.	AAGGGACAAAACUGAUUUUAGGUG	4	0	0	1	1	2	7	24	N
Fvb1:5450698-5451048	IR_175	Fvb1	5450698	5451048	351	466	144	0.695	.	CCCGGACGACAGCACAGGCUU	47	36	4	167	27	33	199	24	N
Fvb1:5452927-5453294	IR_176	Fvb1	5452927	5453294	368	172	111	0.436	.	UCGGGGACGUUGCUAGAGGCCGCU	15	8	3	10	10	19	122	24	N
Fvb1:5494029-5494415	IR_177	Fvb1	5494029	5494415	387	842	214	0.504	.	ACGUGACAGUCUGACGUGGUCCUA	57	16	10	29	10	109	668	24	N
Fvb1:5524236-5524706	IR_178	Fvb1	5524236	5524706	471	35	24	0.686	.	AUUAUAAUCGGGAAGUUGGUGUAA	4	0	1	3	4	3	24	24	N
Fvb1:5555965-5556333	IR_179	Fvb1	5555965	5556333	369	440	205	0.557	.	AGGACUAAACUCAACCAAUGAUGU	31	15	7	13	10	51	344	24	N
Fvb1:5562191-5562578	IR_180	Fvb1	5562191	5562578	388	401	223	0.496	.	AGGGCUUCUCUGCUACCGACGUCC	22	21	3	31	21	51	274	24	N
Fvb1:5687366-5687578	IR_181	Fvb1	5687366	5687578	213	550	197	0.64	.	AGUGAUCGGGGACGCUGCUGGAGU	45	21	2	119	21	52	335	24	N
Fvb1:5806405-5806696	IR_182	Fvb1	5806405	5806696	292	269	133	0.565	.	ACUGGAAUUCGGCGGACUCGC	32	10	0	73	24	29	133	24	N
Fvb1:5806719-5807420	IR_183	Fvb1	5806719	5807420	702	355	87	0.772	.	GCGGACAUCCGUAUCUGAAACGGA	159	6	5	10	12	27	295	24	N
Fvb1:5884486-5884667	IR_184	Fvb1	5884486	5884667	182	20	10	0.1	-	AGUGAGGACUUUCAAAUGAAUGGU	7	0	0	1	0	3	16	24	N
Fvb1:5931585-5931897	IR_186	Fvb1	5931585	5931897	313	6	5	0.333	.	AUACUAUAGCCGACGAAAGACACU	2	0	1	0	0	0	5	24	N
Fvb1:5936857-5937186	IR_188	Fvb1	5936857	5937186	330	502	192	0.56	.	AACGAUCAUCAAUUUGGAUGA	70	18	5	96	5	46	332	24	N
Fvb1:5964588-5965010	IR_189	Fvb1	5964588	5965010	423	20	15	0.2	.	GAGACGGACUGUAUAUAUAUAUA	4	2	0	1	2	5	10	24	N
Fvb1:5995610-5996249	IR_190	Fvb1	5995610	5996249	640	254	135	0.402	.	CUUCACCGUUCAGUUUGUAGAAAC	30	11	6	7	5	35	190	24	N
Fvb1:5996749-5997105	IR_191	Fvb1	5996749	5997105	357	4	4	0.25	.	CCUUUCUCGGCUGCGGACGUCCGC	1	0	0	0	0	0	4	24	N
Fvb1:6004190-6004688	IR_192	Fvb1	6004190	6004688	499	627	276	0.362	.	GGACUAACAUGAUGAUCGACCUA	41	32	3	21	39	132	400	24	N
Fvb1:6010585-6010972	IR_193	Fvb1	6010585	6010972	388	220	99	0.405	.	UUUAGACAUGUGGAUUUUUUACA	17	9	2	6	4	49	150	24	N
Fvb1:6018379-6018588	IR_194	Fvb1	6018379	6018588	210	18	14	0.833	+	AUAAGACAGAGGUGUGUAGAUUGU	3	0	2	0	1	2	13	24	N
Fvb1:6142221-6142501	IR_195	Fvb1	6142221	6142501	281	1191	369	0.721	.	AAAACUGGAAUUCGGCGGACUCGU	199	68	15	60	72	167	809	24	N
Fvb1:6146952-6147597	IR_196	Fvb1	6146952	6147597	646	351	168	0.453	.	AUAGAAAGCCGUCAUGUAGUAUUU	16	11	3	16	12	35	274	24	N
Fvb1:6149637-6150235	IR_197	Fvb1	6149637	6150235	599	449	184	0.419	.	UAGGUCGAGAUGAAAACAUGAGAU	46	9	3	13	11	53	360	24	N
Fvb1:6155603-6156301	IR_198	Fvb1	6155603	6156301	699	1422	352	0.69	.	AACAGAAUUGAGACUUUGUAGGAU	68	41	21	38	25	200	1097	24	N
Fvb1:6237159-6237531	IR_199	Fvb1	6237159	6237531	373	34	26	0.647	.	AGCAAUUGUCUGAUUUAUGGAAAU	7	0	1	1	0	3	29	24	N
Fvb1:6240808-6241191	IR_200	Fvb1	6240808	6241191	384	71	37	0.746	.	AUACAGGAAUUCUCAGGUGCGGAC	10	8	3	2	4	11	43	24	N
Fvb1:6266370-6267067	IR_202	Fvb1	6266370	6267067	698	195	150	0.518	.	AGGAGUGGAGGACAGAGAGGCGGA	6	4	0	14	7	19	151	24	N
Fvb1:6324046-6324744	IR_203	Fvb1	6324046	6324744	699	28	27	0.393	.	GGGUGAAGUACGAGCCGACGCCGA	2	3	0	0	1	1	23	24	N
Fvb1:6385131-6385827	IR_204	Fvb1	6385131	6385827	697	14	13	0.429	.	UGUCGAGGACCAUGUAGAGGUAUU	2	0	0	0	2	1	11	24	N
Fvb1:6386297-6386785	IR_205	Fvb1	6386297	6386785	489	210	119	0.371	.	AAGCCGGUCGCACGGACACGUGGC	18	11	2	11	6	29	151	24	N
Fvb1:6492961-6493206	IR_206	Fvb1	6492961	6493206	246	72	51	0.472	.	CGGAAAACUGGAAUUCGGUGG	7	3	0	19	6	2	42	24	N
Fvb1:6524017-6524171	IR_207	Fvb1	6524017	6524171	155	25	16	0.56	.	AGGUAUAAGUCGUCGGCUAUAGUC	4	1	0	0	1	3	20	24	N
Fvb1:6529331-6529760	IR_208	Fvb1	6529331	6529760	430	19	12	0.632	.	AUUCGUCGGCUAUAGUAUUUAAGC	7	0	2	0	0	1	16	24	N
Fvb1:6534080-6534280	IR_209	Fvb1	6534080	6534280	201	5	3	0.2	.	UUUAAUUUCGUCGGCUAAAGUUGA	3	0	0	0	0	0	5	24	N
Fvb1:6577838-6578286	IR_210	Fvb1	6577838	6578286	449	19	10	0.632	.	AUAAAUGGACGGACUGAAUUCUGU	4	0	0	0	2	3	14	24	N
Fvb1:6578293-6578686	IR_211	Fvb1	6578293	6578686	394	14	12	0.357	.	AGGUCUUCUCGGCUGCGGACGUCC	2	2	0	0	1	2	9	24	N
Fvb1:6578706-6579033	IR_212	Fvb1	6578706	6579033	328	38	26	0.605	.	AACGGGCCUGAUAUAUUUAUAUAU	6	1	0	1	1	5	30	24	N
Fvb1:6587050-6587463	IR_213	Fvb1	6587050	6587463	414	206	104	0.66	.	AAAUACGAGAGAGUCCGGACGAAU	33	12	6	5	4	28	151	24	N
Fvb1:6617204-6617468	IR_214	Fvb1	6617204	6617468	265	115	77	0.635	.	CUGGCGCCGGAGGGUGGAGAAC	11	6	0	14	19	15	61	24	N
Fvb1:6622575-6623083	IR_215	Fvb1	6622575	6623083	509	130	75	0.431	.	ACCGAAGCCGUUGGAACUGACAAG	13	3	1	2	5	20	99	24	N
Fvb1:6675542-6675847	IR_216	Fvb1	6675542	6675847	306	608	270	0.692	.	AAGGACUAAACAGAGAUGUCGACU	65	27	14	22	20	103	422	24	N
Fvb1:6680312-6680783	IR_217	Fvb1	6680312	6680783	472	224	87	0.522	.	UGAUUUGGUGAUCGUUAAGACU	29	10	1	40	37	15	121	24	N
Fvb1:6713068-6713507	IR_218	Fvb1	6713068	6713507	440	1978	369	0.481	.	ACACAACCGGACAGAAUUCAGUCU	292	91	26	493	42	184	1142	24	N
Fvb1:6781815-6782415	IR_219	Fvb1	6781815	6782415	601	401	169	0.678	.	AAAAGGUGAGACACUGUUUGGACU	19	8	2	10	12	60	309	24	N
Fvb1:6782434-6783135	IR_220	Fvb1	6782434	6783135	702	61	48	0.574	.	AGCUCUUGAGCUGAUUACCGGAGA	7	4	1	0	0	19	37	24	N
Fvb1:6783140-6783465	IR_221	Fvb1	6783140	6783465	326	173	62	0.231	.	ACCAUUCGGCAUGUAGAUGCGCGG	62	12	2	5	2	14	138	24	N
Fvb1:6898450-6899147	IR_222	Fvb1	6898450	6899147	698	64	41	0.344	.	AUUAAACUAGGUAAUGUCACGUCA	7	0	0	3	0	5	56	24	N
Fvb1:6952479-6952924	IR_223	Fvb1	6952479	6952924	446	17	12	0.706	.	CGGACGUCCGCACUAAUUUUUUGG	3	1	0	1	0	3	12	24	N
Fvb1:6966833-6967481	IR_224	Fvb1	6966833	6967481	649	12	10	0.25	.	AUUGAUAGUUACCUUCUUGUGCCU	3	1	0	0	0	2	9	24	N
Fvb1:7099239-7099637	IR_225	Fvb1	7099239	7099637	399	84	59	0.417	.	CAUUCCAACACCGUCGGAGGAGGU	9	1	0	7	2	7	67	24	N
Fvb1:7099673-7100003	IR_226	Fvb1	7099673	7100003	331	31	24	0.226	.	ACUGGACGGCUCUGACGACGACGC	4	0	1	1	4	4	21	24	N
Fvb1:7141242-7141919	IR_227	Fvb1	7141242	7141919	678	244	149	0.434	.	AGGAACAGUAUAUGACAAAUGGUC	23	10	0	5	8	37	184	24	N
Fvb1:7145156-7145564	IR_228	Fvb1	7145156	7145564	409	20	15	0.85	+	ACGAAUUAAAACUGUUUAACCUGA	3	1	3	2	0	4	10	24	N
Fvb1:7356980-7357674	IR_231	Fvb1	7356980	7357674	695	103	75	0.505	.	AUCUGGCAUUAGAAUGGGUGGGUG	10	2	6	0	4	8	83	24	N
Fvb1:7370081-7370537	IR_232	Fvb1	7370081	7370537	457	66	53	0.515	.	UUUUGGAUGGCUGAUCGCAUGUGC	4	6	2	2	4	3	49	24	N
Fvb1:7481755-7482188	IR_233	Fvb1	7481755	7482188	434	516	166	0.678	.	AAACACAACCGGACAUAAUUCAGU	112	31	13	52	42	47	331	24	N
Fvb1:7507488-7508185	IR_234	Fvb1	7507488	7508185	698	482	168	0.334	.	UUGAGAUGUGGAAAUACGACC	99	12	5	131	15	37	282	24	N
Fvb1:7561695-7562187	IR_235	Fvb1	7561695	7562187	493	513	157	0.421	.	AGUUUUUAGGUUUAUAUGAGUAGA	44	3	6	6	3	66	429	24	N
Fvb1:7601937-7602322	IR_236	Fvb1	7601937	7602322	386	162	89	0.605	.	AAUUCAAACGGAAUAUGAGAAUUU	12	6	10	12	3	21	110	24	N
Fvb1:7657525-7657892	IR_237	Fvb1	7657525	7657892	368	828	280	0.437	.	GACUGAGAAAAUUGUCGGAAUGAC	69	39	11	33	17	178	550	24	N
Fvb1:7689033-7689474	IR_238	Fvb1	7689033	7689474	442	530	179	0.723	.	ACGUGGCAGUCUGACGUGGUCCUA	96	16	11	16	13	74	400	24	N
Fvb1:7800352-7801049	IR_239	Fvb1	7800352	7801049	698	204	106	0.279	.	AAUCCGGAAAACGAAGAACAAGAU	37	5	4	7	3	17	168	24	N
Fvb1:7815336-7815825	IR_240	Fvb1	7815336	7815825	490	306	115	0.444	.	ACUAAAUCAAACUUUUGAAAGCCU	64	15	6	10	31	52	192	24	N
Fvb1:7815826-7816216	IR_241	Fvb1	7815826	7816216	391	200	123	0.615	.	AAGUCAAUCUAGCCGGAAAACUGC	11	15	5	14	7	17	142	24	N
Fvb1:7815900-7816525	IR_242	Fvb1	7815900	7816525	626	218	136	0.624	.	AAGUCAAUCUAGCCGGAAAACUGC	11	23	6	14	7	14	154	24	N
Fvb1:7816592-7817016	IR_243	Fvb1	7816592	7817016	425	185	57	0.849	+	AAACAAAUGGACGGACUGAAUUCU	83	11	1	6	5	20	142	24	N
Fvb1:7842605-7842942	IR_244	Fvb1	7842605	7842942	338	125	70	0.368	.	AACCUAAUGCAUAGAUCACUUCUG	9	3	1	0	4	21	96	24	N
Fvb1:7940584-7941064	IR_245	Fvb1	7940584	7941064	481	75	53	0.373	.	AUCCAAUUCCUUUGUCAAGUGAUG	5	1	3	2	3	8	58	24	N
Fvb1:7941213-7941910	IR_246	Fvb1	7941213	7941910	698	44	25	0.568	.	ACGGCAUGUAUCGAUUUUGGGUCA	6	4	0	0	0	5	35	24	N
Fvb1:7944837-7945332	IR_247	Fvb1	7944837	7945332	496	714	351	0.513	.	GAUGGAGAUUGGAGGUUUGGACAU	103	15	9	20	19	91	560	24	N
Fvb1:7952906-7953338	IR_248	Fvb1	7952906	7953338	433	1247	344	0.607	.	CCUUAAGUUGAGGACUUGGUGAG	81	95	18	47	17	221	849	24	N
Fvb1:7963273-7963652	IR_249	Fvb1	7963273	7963652	380	1105	373	0.559	.	AUCGGACAGCUCCGACGACGGCGC	209	51	11	42	32	123	846	24	N
Fvb1:7963671-7964057	IR_250	Fvb1	7963671	7964057	387	71	20	0.958	+	ACACACAAUGCUGAUCAGGUGCGG	44	2	0	2	1	9	57	24	N
Fvb1:7964078-7964451	IR_251	Fvb1	7964078	7964451	374	61	35	0.23	.	CAUAAUUAUGUCGAACUUGAACC	10	1	4	2	1	16	37	24	N
Fvb1:8029785-8030203	IR_253	Fvb1	8029785	8030203	419	35	24	0.514	.	CGGAUGUCUGCAGCCAAGAAGGGC	8	2	0	4	0	5	24	24	N
Fvb1:8046726-8047423	IR_254	Fvb1	8046726	8047423	698	166	84	0.331	.	AUUCCGUUUGCAUUUUGAUACCCU	28	2	3	2	3	16	140	24	N
Fvb1:8064944-8065300	IR_255	Fvb1	8064944	8065300	357	57	35	0.491	.	AUUGGGCUCUACCAACUGAACAGU	10	0	0	0	0	4	53	24	N
Fvb1:8065405-8065735	IR_256	Fvb1	8065405	8065735	331	94	39	0.745	.	AAAACUGGAAUUCGGCGGACUUGC	30	4	5	11	6	5	63	24	N
Fvb1:8065758-8066172	IR_257	Fvb1	8065758	8066172	415	1487	82	0.927	+	AACACAACCGGACAGAAUUCAGUC	1102	7	3	69	12	23	1373	24	N
Fvb1:8111254-8111648	IR_258	Fvb1	8111254	8111648	395	2021	301	0.541	.	AUUGGAACGUAGGACCACGUCAGA	224	70	46	38	44	243	1580	24	N
Fvb1:8121260-8121650	IR_259	Fvb1	8121260	8121650	391	1210	336	0.461	.	UCUGACAUGGUCCUACAUUCCAAU	64	40	22	38	40	174	896	24	N
Fvb1:8154638-8155335	IR_260	Fvb1	8154638	8155335	698	10	10	0.7	.	ACGGAAUGAAACUUCAGGUAUGAG	1	0	0	0	0	1	9	24	N
Fvb1:8160087-8160350	IR_261	Fvb1	8160087	8160350	264	70	35	0.157	-	AAAACUGGAAUUCGGCGGACUUGC	15	2	4	9	4	5	46	24	N
Fvb1:8201818-8202279	IR_263	Fvb1	8201818	8202279	462	62	28	0.629	.	CAAGACGCAGAAACAGAAGAAUAC	25	2	3	0	3	9	45	24	N
Fvb1:8203090-8203470	IR_264	Fvb1	8203090	8203470	381	111	47	0.27	.	AAACAGAUCUAAUGGUAUGGACCU	26	2	1	6	1	8	93	24	N
Fvb1:8309431-8309903	IR_265	Fvb1	8309431	8309903	473	139	73	0.863	+	AUGUUCUAGACACUGAACGGUGGA	16	1	0	1	1	18	118	24	N
Fvb1:8331479-8331697	IR_266	Fvb1	8331479	8331697	219	67	20	0.881	+	UGUCCAGAUCUGCGAAUAUAAAGA	16	0	0	12	0	18	37	24	N
Fvb1:8346092-8346494	IR_267	Fvb1	8346092	8346494	403	633	78	0.515	.	AGCCAAUUUGGUGAUCGUUAAGGC	271	7	7	158	4	22	435	24	N
Fvb1:8346501-8346893	IR_268	Fvb1	8346501	8346893	393	2	2	0	-	AAAACUCAGGUGCAGACGUCCGCA	1	0	0	0	0	0	2	24	N
Fvb1:8346648-8347194	IR_269	Fvb1	8346648	8347194	547	22	10	0.773	.	AUAUACCUGAACCGGACAGAAUUC	11	2	0	1	0	0	19	24	N
Fvb1:8347335-8347787	IR_270	Fvb1	8347335	8347787	453	267	133	0.419	.	AUCCGGACUGUAUAUAUAUAUAUA	19	19	9	42	12	30	155	24	N
Fvb1:8347788-8348312	IR_271	Fvb1	8347788	8348312	525	506	179	0.759	.	AAACUGGAAUUCGGCGGACUCGUC	41	38	10	44	61	41	312	24	N
Fvb1:8348314-8348795	IR_272	Fvb1	8348314	8348795	482	415	198	0.723	.	AAGGAUCCCUCAAUAGAAAGGGGC	28	35	13	17	11	49	290	24	N
Fvb1:8372302-8372760	IR_273	Fvb1	8372302	8372760	459	10	10	0.6	.	AUACAGGCCUUCUCGGCUGCGGAC	1	0	0	1	0	0	9	24	N
Fvb1:8373003-8373566	IR_274	Fvb1	8373003	8373566	564	43	31	0.442	.	CUUUAACCCGGAGUGCGGACGUCC	6	2	4	1	2	2	32	24	N
Fvb1:8373567-8373881	IR_275	Fvb1	8373567	8373881	315	1675	468	0.765	.	GAGAAGCUGUCGCCGGCGUGA	99	197	16	472	142	142	706	24	N
Fvb1:8424747-8425189	IR_276	Fvb1	8424747	8425189	443	712	235	0.615	.	AAUUUCAGCCAUGAUCGUUAAUGC	107	39	14	99	33	60	467	24	N
Fvb1:8466113-8466562	IR_278	Fvb1	8466113	8466562	450	49	31	0.306	.	AUAUGAAAUUUUGUAGAGGUGAUC	12	0	2	3	3	7	34	24	N
Fvb1:8479818-8480108	IR_279	Fvb1	8479818	8480108	291	1	1	0	-	AUAGAACUCUUGUAUGUACGUAUA	1	0	0	0	0	0	1	24	N
Fvb1:8494471-8494911	IR_280	Fvb1	8494471	8494911	441	182	66	0.791	.	AUAGAACUACAUAUUGAACGGUGG	24	1	0	14	14	45	108	24	N
Fvb1:8504677-8505094	IR_281	Fvb1	8504677	8505094	418	85	48	0.353	.	ACGGAAUAUGAGAAUUUGGGCACU	12	1	4	3	4	12	61	24	N
Fvb1:8507198-8507501	IR_282	Fvb1	8507198	8507501	304	85	46	0.706	.	ACUGAGAAAAUUGUCGGAUUGACU	8	3	2	2	4	15	59	24	N
Fvb1:8508041-8508478	IR_283	Fvb1	8508041	8508478	438	175	61	0.269	.	AGAAAAACGUAGUUUUGAGUGCCU	70	3	0	3	0	14	155	24	N
Fvb1:8511500-8511734	IR_285	Fvb1	8511500	8511734	235	47	29	0.532	.	CGCUGCUGGAGUCUUCUGGGG	12	2	0	19	0	5	21	24	N
Fvb1:8512012-8512358	IR_286	Fvb1	8512012	8512358	347	65	36	0.754	.	GUCGCCGGCGUGAGACGGCAGAGA	6	0	0	12	4	1	48	24	N
Fvb1:8583795-8584436	IR_287	Fvb1	8583795	8584436	642	927	171	0.838	+	AGUCCUUGUGGUUUGAAGUCGACA	517	18	4	16	24	46	819	24	N
Fvb1:8636727-8637034	IR_288	Fvb1	8636727	8637034	308	75	50	0.24	.	CCCCCGACGAUGUUAGAAUGA	6	5	2	21	3	7	37	24	N
Fvb1:8708239-8708807	IR_289	Fvb1	8708239	8708807	569	277	69	0.87	+	UGACUGACAAUAUGGUACCCGAAC	31	1	9	5	11	39	212	24	N
Fvb1:8808523-8808948	IR_290	Fvb1	8808523	8808948	426	199	80	0.673	.	GGUGAUCGUUAAGGCCCUCAAACU	39	3	4	2	7	28	155	24	N
Fvb1:8827871-8828568	IR_291	Fvb1	8827871	8828568	698	94	54	0.5	.	CUAACAGAAUGAAACUUCGGGUAU	6	0	2	0	1	14	77	24	N
Fvb1:8856639-8857082	IR_292	Fvb1	8856639	8857082	444	37	29	0.541	.	AACUAAAUUGAACUUUUGAAAGCC	3	2	2	1	0	2	30	24	N
Fvb1:8945198-8945605	IR_293	Fvb1	8945198	8945605	408	224	101	0.406	.	GGUGAAAAUGUAGAAAAGUGACAU	58	8	1	7	3	25	180	24	N
Fvb1:8945652-8946080	IR_294	Fvb1	8945652	8946080	429	257	80	0.817	+	AAGGAUGUCCGCCUCUGAUCCGGA	59	13	0	17	13	28	186	24	N
Fvb1:8971558-8971985	IR_295	Fvb1	8971558	8971985	428	113	56	0.796	.	GUCAUUUUGAAAGUUUAGGUAUGA	12	1	6	7	4	13	82	24	N
Fvb1:9038091-9038476	IR_296	Fvb1	9038091	9038476	386	685	335	0.597	.	AAAACUGAAAUUCGGCUGACUCGC	46	47	13	72	39	54	460	24	N
Fvb1:9038571-9039043	IR_297	Fvb1	9038571	9039043	473	59	22	0.814	+	AUAUAGCCCAACGAACUGAACGGU	32	3	0	0	1	3	52	24	N
Fvb1:9039305-9039624	IR_298	Fvb1	9039305	9039624	320	245	147	0.559	.	AGGGACAUCUGCACUUUAAGCCGA	24	9	3	29	17	22	165	24	N
Fvb1:9073523-9073834	IR_299	Fvb1	9073523	9073834	312	269	117	0.796	.	CAAAACUAAACAAAUGUCGACU	22	23	4	11	27	39	165	24	N
Fvb1:9090918-9091407	IR_300	Fvb1	9090918	9091407	490	153	80	0.438	.	AUCCAAUUCCUCCGUCAAGUGAUG	26	3	6	2	0	32	110	24	N
Fvb1:9092138-9092482	IR_301	Fvb1	9092138	9092482	345	158	74	0.506	.	AUUAGAAUGUAGGACCACGUCAUA	15	2	4	4	5	13	130	24	N
Fvb1:9109931-9110586	IR_303	Fvb1	9109931	9110586	656	257	75	0.195	-	GAUGAACCGGACAGAAUUCAGUCC	108	3	4	35	11	30	174	24	N
Fvb1:9162473-9162804	IR_304	Fvb1	9162473	9162804	332	9	7	0.444	.	GAAGUUUUGGGUGAUCUGGCCGGA	2	1	0	1	1	2	4	24	N
Fvb1:9231305-9231990	IR_305	Fvb1	9231305	9231990	686	60	51	0.45	.	AAGUAAAGUGAUUAAUGAGUCAAA	4	1	2	2	3	10	42	24	N
Fvb1:9240965-9241446	IR_306	Fvb1	9240965	9241446	482	607	307	0.669	.	UUGAUGAGGAUAAACUGAAAUUAG	22	19	10	19	16	108	435	24	N
Fvb1:9298842-9299507	IR_307	Fvb1	9298842	9299507	666	149	81	0.289	.	AACGGCAGUGAGUUAAAUGAGAGA	36	11	2	2	2	14	118	24	N
Fvb1:9299804-9300487	IR_308	Fvb1	9299804	9300487	684	697	300	0.482	.	AUUGUUUCAUUUAAAAUCUGACA	38	37	15	25	24	161	435	24	N
Fvb1:9334230-9334695	IR_309	Fvb1	9334230	9334695	466	19	14	0.105	-	AGAAGAAGGACUAACAUGAUAAUC	3	0	0	0	0	2	17	24	N
Fvb1:9489634-9490331	IR_310	Fvb1	9489634	9490331	698	100	62	0.71	.	CCAAAAACUCAGUAGAAUUCUCAC	11	5	1	5	3	19	67	24	N
Fvb1:9551518-9551935	IR_311	Fvb1	9551518	9551935	418	2692	461	0.369	.	AUGAGGAUAUUUAAGUUGAGGACU	672	119	30	87	28	281	2147	24	N
Fvb1:9570897-9571332	IR_312	Fvb1	9570897	9571332	436	475	119	0.688	.	AGUAUCUAGAUAAUAUUGUGUAGA	218	15	2	73	15	22	348	24	N
Fvb1:9571333-9571747	IR_313	Fvb1	9571333	9571747	415	119	64	0.571	.	AAAUGCAGACAUCCGCACCUGAGA	12	2	2	7	4	20	84	24	N
Fvb1:9655769-9656281	IR_314	Fvb1	9655769	9656281	513	531	205	0.674	.	AAGGCACUCAAACUCGAUUAAACA	68	19	11	20	12	99	370	24	N
Fvb1:9657535-9657997	IR_315	Fvb1	9657535	9657997	463	230	88	0.639	.	AAUUCAUGUUUGGAUAAAGAAAUG	81	2	0	7	6	25	190	24	N
Fvb1:9699254-9699537	IR_316	Fvb1	9699254	9699537	284	333	142	0.541	.	AUAAGAACUAUUUGGAUAAAAAAU	19	1	4	4	9	39	276	24	N
Fvb1:9753253-9753701	IR_317	Fvb1	9753253	9753701	449	529	253	0.679	.	AGACUGAUUCUGUCAAACAUGAAC	38	23	15	58	22	99	312	24	N
Fvb1:9835751-9836448	IR_318	Fvb1	9835751	9836448	698	519	305	0.407	.	UUAGUAGACCCAGCAAUUAAAAAU	25	28	7	20	10	83	371	24	N
Fvb1:9858612-9859009	IR_319	Fvb1	9858612	9859009	398	37	16	0.784	.	UUGAGAGUACAAGGACUAACGUU	8	1	0	2	0	16	18	24	N
Fvb1:9878525-9878743	IR_320	Fvb1	9878525	9878743	219	13285	1168	0.602	.	CGAGGACUUUCAAAUGAAUGGUU	3514	535	174	415	291	4868	7002	24	N
Fvb1:9894681-9894901	IR_321	Fvb1	9894681	9894901	221	1962	198	0.426	.	AGCCAAUUUGGUGAUCGUUAAGGC	834	29	8	148	131	210	1436	24	N
Fvb1:9894903-9895266	IR_322	Fvb1	9894903	9895266	364	53	41	0.585	.	AGAUGAUCUAGAUAUGUCUAGA	4	0	0	7	10	4	32	24	N
Fvb1:9895286-9895778	IR_323	Fvb1	9895286	9895778	493	500	96	0.682	.	AGACUUUCAAAAGUUUGAUUUAGU	128	3	2	78	21	36	360	24	N
Fvb1:9904005-9904411	IR_324	Fvb1	9904005	9904411	407	150	86	0.56	.	AGUUUAGGAUGAACAUAUUCAGUU	11	4	1	3	8	15	119	24	N
Fvb1:9904429-9904823	IR_325	Fvb1	9904429	9904823	395	95	59	0.632	.	AUAACGAAGUUUCGCUUUGGACAG	6	3	2	1	3	9	77	24	N
Fvb1:9904828-9905209	IR_326	Fvb1	9904828	9905209	382	106	80	0.547	.	CAAGAGAAGCGCCGUCGUCGACA	7	5	2	7	6	17	69	24	N
Fvb1:9905587-9906051	IR_327	Fvb1	9905587	9906051	465	54	44	0.537	.	AAGGUACUCAAACUCGAUUAAACC	5	0	0	6	1	14	33	24	N
Fvb1:9906052-9906420	IR_328	Fvb1	9906052	9906420	369	63	40	0.508	.	AGCCAUCGCCGGCGUGAGACGGUG	5	1	0	9	1	7	45	24	N
Fvb1:9906424-9906883	IR_329	Fvb1	9906424	9906883	460	37	25	0.757	.	AGUAUCUAGAUAAUAUUGUGUAGA	10	0	1	1	0	3	32	24	N
Fvb1:9908308-9908773	IR_330	Fvb1	9908308	9908773	466	129	55	0.566	.	AUAUGAAAUUUUGUAGAGGUGAUC	21	2	1	3	3	15	105	24	N
Fvb1:9920340-9920729	IR_331	Fvb1	9920340	9920729	390	145	54	0.779	.	AUUUGAGAGUACAAGGACCAACGU	34	5	2	4	1	16	117	24	N
Fvb1:9937051-9937526	IR_332	Fvb1	9937051	9937526	476	66	39	0.303	.	UUUGAUGAAGAUUGGAGGUUU	13	3	0	17	5	8	33	24	N
Fvb1:9993498-9994152	IR_333	Fvb1	9993498	9994152	655	762	308	0.432	.	AACAGUCCCUCAACUCUGAUGUAC	100	31	12	28	26	105	560	24	N
Fvb1:10023428-10023819	IR_334	Fvb1	10023428	10023819	392	114	52	0.351	.	GAUGUCAUUUGAGAGUACAAGAAC	27	7	2	0	0	7	98	24	N
Fvb1:10025248-10025650	IR_335	Fvb1	10025248	10025650	403	43	28	0.512	.	UAGGACAUUUGGUCACGCUUGAGG	5	2	1	3	1	4	32	24	N
Fvb1:10029848-10030263	IR_336	Fvb1	10029848	10030263	416	195	95	0.574	.	CUGAGAAUUCCUGUAUAUAUAUAU	27	4	2	13	7	17	152	24	N
Fvb1:10030280-10030639	IR_337	Fvb1	10030280	10030639	360	351	188	0.442	.	AGACAUAUGUAGAUCAUCUCUGUA	24	10	3	20	32	67	219	24	N
Fvb1:10053134-10053434	IR_338	Fvb1	10053134	10053434	301	662	176	0.734	.	AAGGACCAUUUAGAUUAAAAUAAA	176	8	8	12	13	87	534	24	N
Fvb1:10061694-10062164	IR_339	Fvb1	10061694	10062164	471	324	165	0.534	.	GAUGGAGAUUAGAGGUUUGGACAU	21	12	8	8	3	72	221	24	N
Fvb1:10063011-10063456	IR_340	Fvb1	10063011	10063456	446	167	100	0.629	.	AUGUAAAUAACAGAGAGCCCGGAC	10	5	4	4	4	23	127	24	N
Fvb1:10067641-10068124	IR_341	Fvb1	10067641	10068124	484	102	46	0.824	+	AGAAGGGCCCUGUAUAUAUAUAUC	20	9	0	2	4	7	80	24	N
Fvb1:10068125-10068605	IR_342	Fvb1	10068125	10068605	481	147	79	0.633	.	UAUAGACCUAAGAUAUGAACGG	12	3	2	12	23	15	92	24	N
Fvb1:10111035-10111434	IR_343	Fvb1	10111035	10111434	400	550	232	0.458	.	GAAGCUUCGCUCUGGAUAGGAACU	50	16	8	17	12	70	427	24	N
Fvb1:10189832-10190261	IR_345	Fvb1	10189832	10190261	430	85	43	0.671	.	CAGCUGGUUAUGACUGUGACAUGC	14	2	0	1	2	4	76	24	N
Fvb1:10235660-10236102	IR_346	Fvb1	10235660	10236102	443	39	20	0.795	.	AGACUGUAGAGAACGGACGAAGUC	6	1	0	3	0	6	29	24	N
Fvb1:10275645-10276108	IR_347	Fvb1	10275645	10276108	464	60	25	0.8	+	ACGAGACGCAAAACAGAAGAACAC	25	0	0	2	2	4	52	24	N
Fvb1:10333800-10334470	IR_348	Fvb1	10333800	10334470	671	1570	497	0.578	.	GCGGCAACAACAAGAUCCUUGAGU	83	45	26	47	45	289	1118	24	N
Fvb1:10368325-10368801	IR_349	Fvb1	10368325	10368801	477	718	287	0.65	.	AGGAGAAUGACUAACAUGAUGAUC	55	26	12	41	26	105	508	24	N
Fvb1:10499721-10500084	IR_350	Fvb1	10499721	10500084	364	7	6	0.857	+	AAACAGAUGUCGACUUCAAACCAC	2	0	0	0	1	2	4	24	N
Fvb1:10518048-10518335	IR_351	Fvb1	10518048	10518335	288	67	35	0.731	.	AAACUGGAAUUUGGCGGACUCGC	10	0	2	7	3	16	39	24	N
Fvb1:10582043-10582399	IR_353	Fvb1	10582043	10582399	357	59	40	0.492	.	AGUCAAAUUGAUAAUCGUUAAGGC	6	1	1	0	1	3	53	24	N
Fvb1:10625172-10625564	IR_354	Fvb1	10625172	10625564	393	308	149	0.714	.	UUCUGUCGAACUUGAACUGUUUGA	38	15	6	16	11	51	209	24	N
Fvb1:10698278-10698716	IR_355	Fvb1	10698278	10698716	439	63	31	0.159	-	AGGACUUGGUGAGGACUUUUCGGU	23	5	1	1	1	8	47	24	N
Fvb1:10711888-10712265	IR_356	Fvb1	10711888	10712265	378	76	45	0.553	.	AGGGAUAGAACAAUCGGUUAACGA	17	2	1	1	7	7	58	24	N
Fvb1:10735522-10736024	IR_357	Fvb1	10735522	10736024	503	15	10	0.533	.	AAUGACUAACAUGAUGAUCGACCU	4	0	0	0	1	5	9	24	N
Fvb1:10742992-10743416	IR_358	Fvb1	10742992	10743416	425	68	35	0.221	.	GAGGACCCUUAAGUUGAAGACUUG	13	7	0	0	0	6	55	24	N
Fvb1:10814422-10814842	IR_360	Fvb1	10814422	10814842	421	1323	325	0.513	.	AGGACUUGGUGAGGACUUUUCGGU	248	61	19	37	28	199	979	24	N
Fvb1:10919762-10920460	IR_361	Fvb1	10919762	10920460	699	54	50	0.463	.	ACGAGGAUGAUGACGGAUCAAGGG	3	10	0	4	3	4	33	24	N
Fvb1:10957616-10957961	IR_362	Fvb1	10957616	10957961	346	8	7	0.75	.	AUUCGUCGGCUAUAGUAUUUUAGC	2	1	0	1	0	0	6	24	N
Fvb1:10985633-10986012	IR_363	Fvb1	10985633	10986012	380	168	93	0.411	.	AUGAAAUUGUAAACUUUAGAGGGU	20	10	2	15	2	24	115	24	N
Fvb1:11001676-11002096	IR_364	Fvb1	11001676	11002096	421	864	302	0.537	.	AAGAGGAGAGGCGUCGUCGGCGUC	121	68	11	43	40	118	584	24	N
Fvb1:11021798-11022252	IR_365	Fvb1	11021798	11022252	455	366	137	0.35	.	AACAGAUGUCGACUUUAAACUAGU	30	7	7	12	8	30	302	24	N
Fvb1:11042569-11042970	IR_366	Fvb1	11042569	11042970	402	319	30	0.966	+	AUGAAAUUUUGUAGAGGUGAUCUA	190	4	0	4	2	12	297	24	N
Fvb1:11043193-11043637	IR_367	Fvb1	11043193	11043637	445	16	11	0.812	+	CCGAGAAGGGCUGUGUGUGUAUA	3	0	0	0	1	7	8	24	N
Fvb1:11046596-11047030	IR_368	Fvb1	11046596	11047030	435	244	102	0.754	.	CGGUUUCUCUCCUUCCAGGAC	15	37	2	63	22	14	106	24	N
Fvb1:11081943-11082315	IR_369	Fvb1	11081943	11082315	373	53	27	0.717	.	AUCCCUCAUAUAAGUCAUAAUAAG	14	1	0	1	4	6	41	24	N
Fvb1:11088858-11089280	IR_370	Fvb1	11088858	11089280	423	40	29	0.775	.	UUGAUGAUCGUUAAGGUGCUC	5	0	0	6	0	4	30	24	N
Fvb1:11098638-11099061	IR_371	Fvb1	11098638	11099061	424	1126	287	0.729	.	CUAAGAUAUGAACGGUGGAGAUGU	200	53	10	54	55	126	828	24	N
Fvb1:11149474-11149695	IR_372	Fvb1	11149474	11149695	222	10	9	0.7	.	AAUUUUAAUUUCGUCGGCUAAAGA	2	0	0	1	0	2	7	24	N
Fvb1:11163862-11164543	IR_373	Fvb1	11163862	11164543	682	78	57	0.397	.	AAGUAAAGUGAUUAAUGGAUCAAA	6	4	1	2	2	7	62	24	N
Fvb1:11204646-11205104	IR_374	Fvb1	11204646	11205104	459	401	124	0.576	.	AUUUAGACAUGUAGAUUUUCUUCA	44	16	7	2	12	53	311	24	N
Fvb1:11232191-11232688	IR_375	Fvb1	11232191	11232688	498	615	251	0.585	.	AUCAGUCGGGUCCAAUUUUUGAAU	81	21	10	26	10	77	471	24	N
Fvb1:11253354-11253964	IR_376	Fvb1	11253354	11253964	611	394	175	0.307	.	AAACGGUGUAGGUUUGACAUAAGC	37	18	7	11	8	47	303	24	N
Fvb1:11274041-11274485	IR_377	Fvb1	11274041	11274485	445	31	15	0.742	.	AUAUAGACCUAAGAUAUGAACGGU	12	0	1	3	2	2	23	24	N
Fvb1:11319482-11319804	IR_378	Fvb1	11319482	11319804	323	233	113	0.635	.	AUUCCAGUUUUCCGGCCAGAUUGA	15	13	6	19	13	22	160	24	N
Fvb1:11325879-11326281	IR_379	Fvb1	11325879	11326281	403	61	34	0.574	.	ACGAAAAUCCGCACUGUAAAACGG	10	4	1	2	2	7	45	24	N
Fvb1:11346627-11346937	IR_380	Fvb1	11346627	11346937	311	640	214	0.789	.	AAGGACCAUUCAGAUUAAAAUAAA	87	22	3	18	11	80	506	24	N
Fvb1:11364447-11364896	IR_381	Fvb1	11364447	11364896	450	27	20	0.667	.	AGCUAAUUUAGAGAUCGUUAAGGU	5	0	1	1	1	2	22	24	N
Fvb1:11364908-11365605	IR_382	Fvb1	11364908	11365605	698	62	38	0.774	.	ACACAAGAUAACGGAAGACAUAAC	8	2	3	1	3	9	44	24	N
Fvb1:11381569-11382266	IR_383	Fvb1	11381569	11382266	698	125	87	0.664	.	GGUGAAUCAUGUGUUGGCUGCAUA	8	4	0	6	5	16	94	24	N
Fvb1:11421635-11421955	IR_384	Fvb1	11421635	11421955	321	136	60	0.706	.	AAUAUGUAUGUGUGCGUCUGGACU	38	2	2	1	1	18	112	24	N
Fvb1:11443102-11443800	IR_385	Fvb1	11443102	11443800	699	35	30	0.571	.	AAUGACCUAGAUUUAUUGUUUGAA	3	1	0	1	1	6	26	24	N
Fvb1:11445199-11445598	IR_386	Fvb1	11445199	11445598	400	76	59	0.447	.	AUAGCCCAACGAACUGAACGAUGG	4	4	3	2	2	25	40	24	N
Fvb1:11457496-11457887	IR_387	Fvb1	11457496	11457887	392	31	23	0.29	.	AAACUGGAAUUCGGCGGACUCGC	7	4	0	1	2	9	15	24	N
Fvb1:11498769-11499467	IR_389	Fvb1	11498769	11499467	699	203	109	0.621	.	AUGUCAAGUCAGCUGAAUGAAGGG	17	6	0	3	1	41	152	24	N
Fvb1:11537665-11538044	IR_390	Fvb1	11537665	11538044	380	493	192	0.325	.	AACGGAGAUUUUAGACAUGGCUGA	42	26	10	22	9	43	383	24	N
Fvb1:11553011-11553310	IR_391	Fvb1	11553011	11553310	300	359	146	0.443	.	AUCUGGAAGGAAAAUCGUGACUUC	49	18	5	10	26	64	236	24	N
Fvb1:11591302-11591618	IR_392	Fvb1	11591302	11591618	317	5	5	0.8	+	CCUAAUGUAUUCGUCGGCU	1	1	0	0	0	0	4	24	N
Fvb1:11597675-11598104	IR_393	Fvb1	11597675	11598104	430	284	116	0.306	.	CUUGGUCCUAAAGUUGUAAAAUU	23	12	7	18	11	43	193	24	N
Fvb1:11607766-11608150	IR_394	Fvb1	11607766	11608150	385	37	34	0.297	.	AGAGAGAGAGGUUAAAGGAUUAAA	2	2	1	4	0	3	27	24	N
Fvb1:11655509-11655664	IR_395	Fvb1	11655509	11655664	156	1	1	0	-	UCGGCUAAAAGUCUGGACUAUAGC	1	0	0	0	0	0	1	24	N
Fvb1:11664196-11664730	IR_397	Fvb1	11664196	11664730	535	176	84	0.489	.	UAUCUAGAUCAUCUUGUGUAGAUC	16	14	2	15	15	15	115	24	N
Fvb1:11664737-11665136	IR_398	Fvb1	11664737	11665136	400	22	14	0.5	.	AGAAAAACGUAAUUUUGAGGGCCU	3	1	1	1	0	1	18	24	N
Fvb1:11665234-11665522	IR_399	Fvb1	11665234	11665522	289	95	40	0.274	.	ACUGGAAUUCGGCGGACUCGC	27	5	0	30	3	19	38	24	N
Fvb1:11692504-11692871	IR_401	Fvb1	11692504	11692871	368	75	44	0.493	.	CAUAGACACCUAGAUACUGAAUGG	11	3	2	1	0	5	64	24	N
Fvb1:11692902-11693393	IR_402	Fvb1	11692902	11693393	492	31	22	0.323	.	ACACAAUCCGGAUCCAAAGAGGAC	5	0	0	3	0	5	23	24	N
Fvb1:11693404-11693751	IR_403	Fvb1	11693404	11693751	348	67	41	0.627	.	AAAACUAGAAUUCGGCGGACUCGC	16	3	0	0	6	3	55	24	N
Fvb1:11704170-11704511	IR_404	Fvb1	11704170	11704511	342	40	31	0.45	.	CAUAGACACCUAGAUACUGAAUGG	6	1	0	1	1	5	32	24	N
Fvb1:11704559-11705068	IR_405	Fvb1	11704559	11705068	510	9	4	0.333	.	UUUAACGAUCAUCAAAAUUUCUGA	3	0	0	0	0	0	9	24	N
Fvb1:11705075-11705471	IR_406	Fvb1	11705075	11705471	397	15	14	0.4	.	GAGGAGCUCUAUAUAUAUAUAUAU	2	0	0	0	0	1	14	24	N
Fvb1:11705512-11705916	IR_407	Fvb1	11705512	11705916	405	69	44	0.638	.	AAAACUAGAAUUCGGCGGACUCGC	15	1	1	4	3	7	53	24	N
Fvb1:11710558-11710931	IR_408	Fvb1	11710558	11710931	374	18	16	0.556	.	ACAUAAUUCUGUCAAACUUGAACC	2	2	1	1	0	4	10	24	N
Fvb1:11729705-11730253	IR_409	Fvb1	11729705	11730253	549	48	33	0.625	.	CUUGGCCUGUCAAUUAAAUGU	5	4	0	8	0	5	31	24	N
Fvb1:11742614-11743045	IR_410	Fvb1	11742614	11743045	432	137	72	0.526	.	CUACACAAUAUUAUCUAGAUACUA	18	2	1	8	6	16	104	24	N
Fvb1:11800589-11800872	IR_411	Fvb1	11800589	11800872	284	472	208	0.663	.	GAAAGUGAUCGGAGAUGCUGC	29	16	5	82	39	26	304	24	N
Fvb1:11878263-11878960	IR_412	Fvb1	11878263	11878960	698	312	122	0.686	.	AGGACCCAGACAUUACCCGAAAUA	68	4	5	5	7	34	257	24	N
Fvb1:11891516-11892098	IR_413	Fvb1	11891516	11892098	583	105	53	0.486	.	CGGAAAACUGGAAUUCGGCGGACU	9	14	3	36	3	11	38	24	N
Fvb1:11931071-11931484	IR_414	Fvb1	11931071	11931484	414	725	201	0.241	.	AGGAGACUGUAUAUAUAUAUAUA	113	15	14	26	42	272	356	24	N
Fvb1:11954500-11954896	IR_415	Fvb1	11954500	11954896	397	59	41	0.61	.	CAGAUACGGACGUCCGCACCGCCU	6	1	1	3	5	8	41	24	N
Fvb1:11954900-11955293	IR_416	Fvb1	11954900	11955293	394	61	43	0.607	.	AUAAUCUGAACGAUGAAGAUGUGG	5	0	1	0	4	3	53	24	N
Fvb1:11955360-11955993	IR_418	Fvb1	11955360	11955993	634	1523	187	0.957	+	AAAACUGGAAUUCGGCGGACUCGC	593	55	15	571	75	42	765	24	N
Fvb1:11956100-11956497	IR_419	Fvb1	11956100	11956497	398	171	100	0.69	.	AGUGUCUAGAACAUAGUGUGUAGA	14	1	1	8	10	24	127	24	N
Fvb1:11966607-11967304	IR_420	Fvb1	11966607	11967304	698	36	33	0.833	+	CAUCGGAGAUGUUUGAAACUC	2	1	1	12	4	2	16	24	N
Fvb1:11975736-11976433	IR_421	Fvb1	11975736	11976433	698	84	53	0.464	.	AGCACAACACUGGUCAAUAAGAUU	9	2	2	2	2	10	66	24	N
Fvb1:12066949-12067232	IR_422	Fvb1	12066949	12067232	284	81	51	0.556	.	CGAGAUUGAUGUCAUUUUGAAAG	4	6	0	12	1	14	48	24	N
Fvb1:12068307-12068583	IR_423	Fvb1	12068307	12068583	277	24	18	0.458	.	AUGGACAUCCUUAGCAGAGAAGGA	4	1	1	0	1	3	18	24	N
Fvb1:12071655-12072035	IR_424	Fvb1	12071655	12072035	381	28	14	0.571	.	AAAAAACAGAUCUAAUGGUGUGGA	6	0	0	0	1	4	23	24	N
Fvb1:12094842-12095015	IR_425	Fvb1	12094842	12095015	174	1765	349	0.541	.	AUAAUGAGGACCAAGUGAGGACUU	104	121	16	84	49	293	1202	24	N
Fvb1:12099922-12100286	IR_426	Fvb1	12099922	12100286	365	366	108	0.82	+	ACCAUAAGGACUAAACAGAUGUU	23	4	3	5	7	49	298	24	N
Fvb1:12120858-12121307	IR_427	Fvb1	12120858	12121307	450	6	5	0.167	-	GAGUAGAUCAUUUCUGGAUAUUUU	2	0	0	0	0	0	6	24	N
Fvb1:12129406-12129842	IR_430	Fvb1	12129406	12129842	437	6	5	0.333	.	AUGAGUAGAUCAUUUCUGGAUAUU	2	1	0	0	0	1	4	24	N
Fvb1:12129843-12130293	IR_431	Fvb1	12129843	12130293	451	8	6	0.25	.	GAUGAAAUUCGAUCAGAAAGUGGU	2	0	0	0	0	1	7	24	N
Fvb1:12142839-12143137	IR_433	Fvb1	12142839	12143137	299	176	86	0.273	.	AGCCUAAUCUACUGGUAGUUGAGC	27	5	0	7	4	30	130	24	N
Fvb1:12145009-12145504	IR_434	Fvb1	12145009	12145504	496	87	61	0.402	.	AGAAUAACUAACAUGAUGAUCGUC	5	3	3	4	0	17	60	24	N
Fvb1:12150156-12150546	IR_435	Fvb1	12150156	12150546	391	64	42	0.469	.	UGAUGAAAAUAAAAGUGUAGGGAC	6	5	1	3	5	3	47	24	N
Fvb1:12158098-12158346	IR_436	Fvb1	12158098	12158346	249	19	13	0.842	+	AUGGUGUAUUUCGUCGGCUUAAGG	3	2	0	0	0	1	16	24	N
Fvb1:12196476-12196880	IR_437	Fvb1	12196476	12196880	405	47	23	0.255	.	AAACGGAAUAUGAGAAUUUAGACA	10	1	1	0	1	3	41	24	N
Fvb1:12205410-12205871	IR_438	Fvb1	12205410	12205871	462	284	97	0.225	.	AAGGCACUGAAACUCGAUUAAACC	118	4	2	12	5	30	231	24	N
Fvb1:12219096-12219635	IR_439	Fvb1	12219096	12219635	540	567	90	0.148	-	ACUAAAUUGAACUUUUGAAAGCCU	386	8	5	14	8	30	502	24	N
Fvb1:12230253-12230665	IR_440	Fvb1	12230253	12230665	413	730	165	0.721	.	AGAAUGUAGGACCACAUUAUACUG	156	25	6	37	12	91	559	24	N
Fvb1:12232715-12233180	IR_441	Fvb1	12232715	12233180	466	220	115	0.518	.	AAGGACCAACAAACUGAACGGUGG	10	4	2	2	3	34	175	24	N
Fvb1:12241599-12242030	IR_442	Fvb1	12241599	12242030	432	64	29	0.672	.	UCUGUUUGGACAACUUUUGUUCUG	12	0	0	3	3	8	50	24	N
Fvb1:12242031-12242439	IR_443	Fvb1	12242031	12242439	409	10	10	0.1	-	CGAGAAGAGCUGUAUAUAUAUAUA	1	0	1	0	1	0	8	24	N
Fvb1:12291268-12291568	IR_444	Fvb1	12291268	12291568	301	169	69	0.686	.	AAAAUAGAGUCCGAACGCACACGU	47	2	2	5	6	14	140	24	N
Fvb1:12297248-12297753	IR_445	Fvb1	12297248	12297753	506	205	75	0.854	+	UAUGAUUUGGUGAUCGUUAAGGCU	44	7	1	12	6	23	156	24	N
Fvb1:12297758-12298122	IR_446	Fvb1	12297758	12298122	365	296	81	0.824	+	AAUCCGGCCGGAAAACUUGUCGCC	137	13	2	54	7	12	208	24	N
Fvb1:12298136-12298590	IR_447	Fvb1	12298136	12298590	455	244	101	0.799	.	AGAGAAGGACUGUAUGUAUGUAUA	32	3	6	4	8	37	186	24	N
Fvb1:12319061-12319261	IR_448	Fvb1	12319061	12319261	201	14	9	0.5	.	AAAGAAAGUUUAAAGUCGUCGGCU	3	0	1	1	0	0	12	24	N
Fvb1:12340598-12341027	IR_449	Fvb1	12340598	12341027	430	153	86	0.771	.	CCGAGAAAGGCUGUAUAUAUAAAU	16	10	2	13	4	16	108	24	N
Fvb1:12341722-12342093	IR_450	Fvb1	12341722	12342093	372	627	159	0.112	-	GAGGACUGAAUUACCACUUUAAGG	271	31	8	16	19	108	445	24	N
Fvb1:12359349-12359774	IR_451	Fvb1	12359349	12359774	426	93	53	0.699	.	UUUUGAAAGUUUAGGUAUGAA	10	2	1	17	5	10	58	24	N
Fvb1:12383660-12384099	IR_452	Fvb1	12383660	12384099	440	126	77	0.611	.	GAAAAACAAAUGGACGGACUGAAU	6	7	2	9	4	20	84	24	N
Fvb1:12410692-12411009	IR_453	Fvb1	12410692	12411009	318	914	294	0.467	.	ACAUGAACCGGACAUAAUUCAGUC	96	48	20	49	48	143	606	24	N
Fvb1:12446902-12447479	IR_454	Fvb1	12446902	12447479	578	46	39	0.326	.	AUAAGAGAUUUAGUGAAACUAAGA	5	3	2	2	1	2	36	24	N
Fvb1:12548064-12548376	IR_456	Fvb1	12548064	12548376	313	178	79	0.652	.	ACUUGAGGACAAAAUUGCGUGAAU	20	5	6	9	0	35	123	24	N
Fvb1:12549570-12549874	IR_457	Fvb1	12549570	12549874	305	46	34	0.283	.	ACAAAUGAUGACUAAUGUAGUAAU	4	1	2	1	4	7	31	24	N
Fvb1:12566646-12567344	IR_458	Fvb1	12566646	12567344	699	225	123	0.582	.	ACUGAACAGAUGAGAUGACAAAAU	11	6	6	3	9	44	157	24	N
Fvb1:12586828-12587085	IR_459	Fvb1	12586828	12587085	258	478	156	0.68	.	ACAAGAACUGAACAUAUGUCGACU	96	20	5	5	5	82	361	24	N
Fvb1:12611567-12612260	IR_460	Fvb1	12611567	12612260	694	355	114	0.8	+	AAGGCACUCAAACUCGAUUAAACC	151	5	4	7	3	35	301	24	N
Fvb1:12612296-12612568	IR_461	Fvb1	12612296	12612568	273	80	44	0.762	.	UGCUGGAGUCUUCUGGGGUGGAGG	11	5	0	8	3	6	58	24	N
Fvb1:12612616-12613019	IR_462	Fvb1	12612616	12613019	404	20	18	0.45	.	GUGCCCUUUAUAUCAUUUUCGUGU	2	0	0	1	0	4	15	24	N
Fvb1:12620893-12621318	IR_463	Fvb1	12620893	12621318	426	11	7	0.182	-	ACAUGAACCGGACAGAAUUCAGUC	5	0	0	0	0	2	9	24	N
Fvb1:12628693-12629101	IR_465	Fvb1	12628693	12629101	409	126	60	0.73	.	GAUAAAUCACACUUAUGAAUGCCU	22	2	4	3	0	12	105	24	N
Fvb1:12630829-12631171	IR_466	Fvb1	12630829	12631171	343	1237	370	0.301	.	GACGGAAGAACUAUUUGAAAGAAA	178	42	21	28	21	226	899	24	N
Fvb1:12663154-12663577	IR_467	Fvb1	12663154	12663577	424	36	26	0.694	.	AGACGGAUUGUGUAUAUAUAUAUA	6	0	0	0	1	4	31	24	N
Fvb1:12675483-12675928	IR_468	Fvb1	12675483	12675928	446	364	151	0.646	.	AGGCCGGAUGUAGAGCGGACGUCC	18	32	1	48	29	27	227	24	N
Fvb1:12684489-12685167	IR_469	Fvb1	12684489	12685167	679	806	174	0.189	-	ACCUAAGGUAGGCUCUAAGAUGGU	134	25	3	41	9	82	646	24	N
Fvb1:12730863-12731315	IR_470	Fvb1	12730863	12731315	453	18	16	0.222	.	CUUCCGUGUGUCGGUCGUGCC	2	0	1	2	1	2	12	24	N
Fvb1:12760010-12760626	IR_471	Fvb1	12760010	12760626	617	277	149	0.332	.	AUGUCAUUUAAUGAGGUUGGAUGA	23	12	7	12	4	31	211	24	N
Fvb1:12843243-12843702	IR_472	Fvb1	12843243	12843702	460	257	148	0.475	.	GAAGCUUCGUUCUAAAUAGGAACU	24	13	10	20	7	38	169	24	N
Fvb1:12848508-12848967	IR_473	Fvb1	12848508	12848967	460	169	38	0.864	+	AUUCUGUCGAACUUGAACCGUUCA	108	0	4	0	1	7	157	24	N
Fvb1:12914056-12914487	IR_474	Fvb1	12914056	12914487	432	316	118	0.247	.	GAAGGAGACUGUAUGUAUAUAUA	45	14	7	15	9	95	176	24	N
Fvb1:12914489-12914869	IR_475	Fvb1	12914489	12914869	381	219	117	0.42	.	AAGAGAAGGGCCGUCGCCGGC	20	7	4	66	9	22	111	24	N
Fvb1:12914890-12915293	IR_476	Fvb1	12914890	12915293	404	48	24	0.771	.	AAUGCUGAUCAGGUGCGGACGUCC	10	1	2	1	0	2	42	24	N
Fvb1:12918302-12918797	IR_477	Fvb1	12918302	12918797	496	685	176	0.345	.	AAGACUGAACUGAUUUUGGCACCA	129	10	12	7	13	288	355	24	N
Fvb1:12982255-12982664	IR_478	Fvb1	12982255	12982664	410	197	92	0.492	.	AGGACAUUUGGUCACGCUUGAGGA	17	2	2	20	7	16	150	24	N
Fvb1:12994144-12994592	IR_479	Fvb1	12994144	12994592	449	88	59	0.523	.	AUGAGUUGUCAAAGUAGUAAUAUU	11	0	1	1	1	19	66	24	N
Fvb1:12995550-12996245	IR_480	Fvb1	12995550	12996245	696	295	127	0.634	.	UCCGUUAGCAUUUUGAUACCCUGA	37	8	5	12	6	32	232	24	N
Fvb1:13022733-13023431	IR_481	Fvb1	13022733	13023431	699	58	37	0.672	.	AAUACUGCUGGAGAUGCUCAAAAG	7	0	1	1	3	9	44	24	N
Fvb1:13053874-13054263	IR_482	Fvb1	13053874	13054263	390	366	124	0.407	.	AAUGUAGGACCACGUCAGAUUGCC	56	19	5	10	11	43	278	24	N
Fvb1:13082243-13082940	IR_483	Fvb1	13082243	13082940	698	52	42	0.75	.	UUAGAAAUAUGGCUGUAUCAAUGC	4	4	0	3	1	8	36	24	N
Fvb1:13114101-13114581	IR_484	Fvb1	13114101	13114581	481	295	142	0.458	.	AUCCAAUUCCUCUGUCAAGUGAUG	17	5	0	11	6	33	240	24	N
Fvb1:13123967-13124355	IR_485	Fvb1	13123967	13124355	389	455	235	0.651	.	CGUACGGUGGCAAACGGAGGGACG	28	24	4	77	31	61	258	24	N
Fvb1:13124356-13124727	IR_486	Fvb1	13124356	13124727	372	297	161	0.805	+	AAAACUGGAAUUCAGCGGACUCGC	24	9	6	15	22	68	177	24	N
Fvb1:13125077-13125618	IR_487	Fvb1	13125077	13125618	542	472	177	0.449	.	AAUCGAAUUUUCACAUCUCCACUG	44	8	17	23	17	31	376	24	N
Fvb1:13125619-13125985	IR_488	Fvb1	13125619	13125985	367	359	144	0.524	.	GAGACGGACUGUAUAUAUAUAUA	70	7	5	34	22	106	185	24	N
Fvb1:13149149-13149532	IR_489	Fvb1	13149149	13149532	384	218	84	0.734	.	ACGGAAUUUUAGCAAUUGGGCUUG	29	2	2	14	7	29	164	24	N
Fvb1:13175533-13176038	IR_490	Fvb1	13175533	13176038	506	77	53	0.597	.	AAUACGACGACGGUAAAAAUAGUA	6	2	1	5	1	8	60	24	N
Fvb1:13178051-13178499	IR_491	Fvb1	13178051	13178499	449	33	23	0.727	.	ACAGAAUUAUGUUCAUCCAUUGGU	4	0	0	0	0	4	29	24	N
Fvb1:13208867-13209294	IR_493	Fvb1	13208867	13209294	428	1415	170	0.887	+	ACAUGAACCGGACAGAAUUCAGUC	921	41	23	39	6	90	1216	24	N
Fvb1:13211980-13212430	IR_494	Fvb1	13211980	13212430	451	101	52	0.485	.	CGGUGGAGAUGAGAAAAUUCGA	16	2	1	11	21	15	51	24	N
Fvb1:13212768-13213212	IR_495	Fvb1	13212768	13213212	445	53	32	0.415	.	AUCAAUGGACGAACAUAAUUCUGU	6	0	1	0	1	2	49	24	N
Fvb1:13216299-13216687	IR_496	Fvb1	13216299	13216687	389	49	33	0.837	+	AGUAGCAAAUUUGAUGUAAAGGUA	5	0	1	0	0	6	42	24	N
Fvb1:13227395-13227736	IR_497	Fvb1	13227395	13227736	342	1273	307	0.914	+	UUGACGGAAGAACCAUUUGGA	127	71	37	298	158	135	574	24	N
Fvb1:13227738-13228439	IR_498	Fvb1	13227738	13228439	702	374	156	0.794	.	AUUAAAGGUCAAUUCAAACGGAAU	55	7	8	14	12	43	290	24	N
Fvb1:13250376-13250781	IR_499	Fvb1	13250376	13250781	406	543	195	0.573	.	AAAGUGUAGGGACUAACAUGAAGU	37	35	4	27	15	66	396	24	N
Fvb1:13282226-13282445	IR_500	Fvb1	13282226	13282445	220	13	11	0.308	.	GAUUGAGAUCUCAAGAUGACGGCC	2	0	1	0	0	2	10	24	N
Fvb1:13326788-13327183	IR_501	Fvb1	13326788	13327183	396	67	45	0.269	.	AACCCGUACGGACGUUUGCACCCG	10	5	1	3	3	6	49	24	N
Fvb1:13369425-13369805	IR_502	Fvb1	13369425	13369805	381	125	66	0.648	.	AUUGUAGGUAUAUAUGAGUAGAUC	16	3	1	1	4	22	94	24	N
Fvb1:13382812-13383510	IR_503	Fvb1	13382812	13383510	699	42	29	0.357	.	GCACAUAUGUAGGACCAAUAGAAU	9	0	1	1	0	10	30	24	N
Fvb1:13401742-13402440	IR_505	Fvb1	13401742	13402440	699	24	23	0.458	.	AUAUUCUUGAUCUGUAGGUUCGAU	2	1	0	2	0	5	16	24	N
Fvb1:13419094-13419342	IR_507	Fvb1	13419094	13419342	249	2	2	0.5	.	UACACUAUAUUUCGUCGGCUAAGA	1	0	0	0	0	0	2	24	N
Fvb1:13423645-13423774	IR_508	Fvb1	13423645	13423774	130	43	12	0.86	+	CCAGAUCUGCGAAUAUAAAGAACU	17	0	0	2	1	7	33	24	N
Fvb1:13472150-13472574	IR_509	Fvb1	13472150	13472574	425	52	22	0.558	.	CUGUCCGGUUGUGUUCAUACCAGA	13	3	0	0	1	7	41	24	N
Fvb1:13472813-13473467	IR_510	Fvb1	13472813	13473467	655	27	22	0.556	.	ACGACCUCGAUCUGAUCAAGAAGU	3	1	0	1	0	3	22	24	N
Fvb1:13493387-13493673	IR_511	Fvb1	13493387	13493673	287	99	56	0.677	.	AGCCAAUUUGGUGAUCGUUAAGGU	18	5	1	6	9	13	65	24	N
Fvb1:13494474-13494900	IR_512	Fvb1	13494474	13494900	427	210	90	0.576	.	AGGGGACUGUAUAUAUAUAUAUA	24	1	0	12	19	61	117	24	N
Fvb1:13494908-13495292	IR_513	Fvb1	13494908	13495292	385	75	38	0.747	.	CUCAAACUCGAAAAACAAAUGGAC	9	1	1	2	2	19	50	24	N
Fvb1:13495320-13495726	IR_514	Fvb1	13495320	13495726	407	1043	382	0.341	.	CCCGGACGACAGCACAGGCUU	51	39	5	221	200	174	404	24	N
Fvb1:13495744-13496078	IR_515	Fvb1	13495744	13496078	335	1313	399	0.573	.	AAAACUGGAAUUCGGCGGACUCGC	399	78	9	129	167	118	812	24	N
Fvb1:13506984-13507681	IR_516	Fvb1	13506984	13507681	698	246	143	0.407	.	AUAGGAAGCCGUCAUGUAGUAUUU	23	4	8	9	11	40	174	24	N
Fvb1:13531564-13531996	IR_517	Fvb1	13531564	13531996	433	2122	446	0.662	.	CCCGGACGACAGCACAGGCUU	564	219	17	740	138	99	909	24	N
Fvb1:13581457-13581856	IR_518	Fvb1	13581457	13581856	400	135	28	0.081	-	AGAGAACGGAGACUGAAAUGAAGU	75	1	1	0	0	6	127	24	N
Fvb1:13589405-13589779	IR_519	Fvb1	13589405	13589779	375	31	27	0.613	.	AUUAGAUCAAAUCAAUGAACGGAU	3	0	2	0	1	1	27	24	N
Fvb1:13589826-13590247	IR_520	Fvb1	13589826	13590247	422	131	75	0.473	.	AUAAGGACCAACAAACUGAACGGU	19	3	5	12	4	15	92	24	N
Fvb1:13633242-13633652	IR_521	Fvb1	13633242	13633652	411	1633	434	0.397	.	AUACUAGUCCGGACGCAAGUAUCU	115	41	16	59	29	220	1268	24	N
Fvb1:13671786-13672443	IR_522	Fvb1	13671786	13672443	658	221	114	0.502	.	AAUGGUAUACGAACUUUUGCUCCU	21	3	4	5	6	42	161	24	N
Fvb1:13693559-13693862	IR_523	Fvb1	13693559	13693862	304	168	88	0.738	.	UUCAUUCUAACACCGUCGGGG	13	5	4	38	11	13	97	24	N
Fvb1:13752118-13752628	IR_524	Fvb1	13752118	13752628	511	32	10	0.281	.	GAGGUAUCAAACUGAUUUUAGACC	14	1	0	8	0	0	23	24	N
Fvb1:13764630-13765328	IR_525	Fvb1	13764630	13765328	699	31	29	0.645	.	AAUGUGCCCCUUGUAAACGCUGCU	2	2	0	1	3	1	24	24	N
Fvb1:13770074-13770506	IR_526	Fvb1	13770074	13770506	433	180	81	0.811	+	UUAACGAUCACCAAAUUGGCU	34	9	0	61	12	14	84	24	N
Fvb1:13770507-13770866	IR_527	Fvb1	13770507	13770866	360	146	110	0.63	.	GUUGCUCUGCAUAUAUAUAGGCCU	5	20	0	15	7	13	91	24	N
Fvb1:13775142-13775556	IR_528	Fvb1	13775142	13775556	415	223	122	0.422	.	AAACGGAAUAUGAGAAUUUGAGCA	19	6	4	13	3	21	176	24	N
Fvb1:13775622-13776017	IR_529	Fvb1	13775622	13776017	396	141	64	0.61	.	GAACACAACCGGACAAAAUUCAGU	20	0	1	16	12	16	96	24	N
Fvb1:13776046-13776413	IR_530	Fvb1	13776046	13776413	368	95	54	0.453	.	AAACUAGAAUUCGGCGGACUCGUC	12	8	2	13	3	8	61	24	N
Fvb1:13776422-13776936	IR_531	Fvb1	13776422	13776936	515	3	3	0.333	.	UAAGGGAUCCUUUUUUUUUGAC	1	0	0	0	1	0	2	24	N
Fvb1:13776939-13777640	IR_532	Fvb1	13776939	13777640	702	347	183	0.487	.	AGCUGUUGGAGUCCGUUGGGGUGG	22	11	7	12	29	44	244	24	N
Fvb1:13777641-13777941	IR_533	Fvb1	13777641	13777941	301	62	31	0.597	.	UAAUAUUGUGUAGAUCAUCUCUA	8	0	0	4	2	25	31	24	N
Fvb1:13797238-13797642	IR_534	Fvb1	13797238	13797642	405	3	2	1	+	CCAAAUGUCCUAUAUUCUGUCCAA	2	0	0	0	0	0	3	24	N
Fvb1:13799630-13799924	IR_535	Fvb1	13799630	13799924	295	66	24	0.939	+	AGGGACUAACAUGAAUUCACCUCU	24	1	0	4	1	0	60	24	N
Fvb1:13799956-13800371	IR_536	Fvb1	13799956	13800371	416	46	32	0.587	.	AGGGCAAAAAGAUUAACCAGGGCU	4	3	1	4	0	5	33	24	N
Fvb1:13805904-13806335	IR_537	Fvb1	13805904	13806335	432	21	8	0.571	.	AUUCGUCGGCUAAAAUAUUUUAGC	13	0	0	0	0	0	21	24	N
Fvb1:13810658-13810858	IR_538	Fvb1	13810658	13810858	201	6	6	0.5	.	CGAAUAUAAAGAACUUUAGCCGAC	1	0	0	0	1	0	5	24	N
Fvb1:13885188-13885605	IR_539	Fvb1	13885188	13885605	418	336	127	0.235	.	AUUAUUGGAUCUGUCAUUUAUUGA	57	9	1	15	9	33	269	24	N
Fvb1:13907353-13907768	IR_541	Fvb1	13907353	13907768	416	91	54	0.538	.	ACUCAAAUGUGGAUCUCUAUGUCA	8	0	2	2	0	12	75	24	N
Fvb1:13955137-13955509	IR_542	Fvb1	13955137	13955509	373	95	50	0.8	+	ACGAACUGAAUUCUGUCUGGUUGU	7	6	5	17	3	14	50	24	N
Fvb1:13983579-13983876	IR_543	Fvb1	13983579	13983876	298	251	99	0.757	.	AAAACUAGAAUUCGGCGGACUCGC	51	16	2	19	15	36	163	24	N
Fvb1:14011356-14011771	IR_544	Fvb1	14011356	14011771	416	101	55	0.465	.	AUUAGUCACUUAAGUCUUGACCCU	11	2	1	1	1	19	77	24	N
Fvb1:14012407-14012781	IR_545	Fvb1	14012407	14012781	375	48	24	0.188	-	AAACAGAUCUAAUGGUGUGGGCCU	17	1	0	0	0	11	36	24	N
Fvb1:14067694-14068125	IR_546	Fvb1	14067694	14068125	432	474	124	0.81	+	GAACACAACCGGACAGAAUUCAGU	226	21	2	33	18	34	366	24	N
Fvb1:14068131-14068480	IR_547	Fvb1	14068131	14068480	350	106	72	0.358	.	AACUGGAAUUCGACGGACUCGCCG	7	5	2	8	4	9	78	24	N
Fvb1:14120289-14120987	IR_548	Fvb1	14120289	14120987	699	434	240	0.433	.	AUUGUGUGACAUUGAAUAGUUCGA	13	12	8	18	12	58	326	24	N
Fvb1:14145158-14145343	IR_549	Fvb1	14145158	14145343	186	649	141	0.445	.	AAUCAUCGUUGGAUGUAAAUCCAA	140	9	8	5	6	71	550	24	N
Fvb1:14179329-14179743	IR_550	Fvb1	14179329	14179743	415	1355	409	0.43	.	ACCUAGAUCUCUAAAUUGAAAACU	124	37	42	31	27	187	1031	24	N
Fvb1:14188890-14189527	IR_551	Fvb1	14188890	14189527	638	195	116	0.559	.	AUCUAACGGCUCGGAUUGGUUCGU	44	13	3	7	3	17	152	24	N
Fvb1:14195500-14195831	IR_552	Fvb1	14195500	14195831	332	139	69	0.374	.	AACCGAAUCUGUUCAUCCUGAACC	37	5	2	5	1	18	108	24	N
Fvb1:14195872-14196304	IR_553	Fvb1	14195872	14196304	433	100	47	0.69	.	AAAACAAAUGGACGGACUGAAUUC	19	2	0	3	11	22	62	24	N
Fvb1:14198222-14198572	IR_554	Fvb1	14198222	14198572	351	12	6	0.917	+	AUUGGCUGAAAUUUUGCAUAGAUG	5	0	0	0	0	0	12	24	N
Fvb1:14232137-14232834	IR_555	Fvb1	14232137	14232834	698	73	52	0.521	.	GCUGAAUUGUGAGCGACGAGACCU	8	2	0	0	2	12	57	24	N
Fvb1:14245141-14245647	IR_556	Fvb1	14245141	14245647	507	63	26	0.667	.	ACACGACUGAUGAAAAUUGAGAGU	16	1	0	0	0	5	57	24	N
Fvb1:14245818-14246182	IR_557	Fvb1	14245818	14246182	365	41	32	0.39	.	AGGAAAUUCGAUCGAGAAGUGGUG	3	4	0	2	1	3	31	24	N
Fvb1:14246209-14246658	IR_558	Fvb1	14246209	14246658	450	5	5	0.6	.	UGAUUUGGUGAUCGUUAAGGCUUU	1	0	1	0	0	0	4	24	N
Fvb1:14420043-14420605	IR_559	Fvb1	14420043	14420605	563	287	65	0.47	.	CUCCAUCGUUCAGUUUGUAGAACC	54	6	5	3	7	26	240	24	N
Fvb1:14504673-14504968	IR_560	Fvb1	14504673	14504968	296	212	104	0.632	.	GAUGAAAUUAAAAGUUUAGGGACU	39	9	3	8	4	18	170	24	N
Fvb1:14506799-14507187	IR_561	Fvb1	14506799	14507187	389	91	34	0.209	.	AAAGUGUAGGGACUAACAUGAAGU	37	2	2	11	1	9	66	24	N
Fvb1:14543619-14544039	IR_562	Fvb1	14543619	14544039	421	181	81	0.398	.	AUGAGGACCACUAAGUUGAGGACU	19	3	4	4	2	21	147	24	N
Fvb1:14597005-14597204	IR_563	Fvb1	14597005	14597204	200	1	1	0	-	CGAAAAUAUAAUUUCGUCGGCUAU	1	0	0	0	0	0	1	24	N
Fvb1:14605740-14606279	IR_564	Fvb1	14605740	14606279	540	24	20	0.708	.	AUUCGUCGGCUAAAAUACUUAAGC	2	2	1	0	1	3	17	24	N
Fvb1:14611484-14611638	IR_565	Fvb1	14611484	14611638	155	2	2	0	-	AUAAGUCGUCGGCUAUAGUCAAGA	1	0	0	0	0	0	2	24	N
Fvb1:14611963-14612660	IR_566	Fvb1	14611963	14612660	698	6	6	0.833	+	AAGUUUAUUCAGAUCAAAAGAAAA	1	0	0	0	0	0	6	24	N
Fvb1:14613009-14613477	IR_567	Fvb1	14613009	14613477	469	43	28	0.256	.	AGCGGUGUCCCACUCUGAAAGGAA	10	3	2	0	1	4	33	24	N
Fvb1:14613527-14613821	IR_568	Fvb1	14613527	14613821	295	39	24	0.641	.	GGAGGCGCGCCUUCGUCGGCG	9	1	0	9	3	3	23	24	N
Fvb1:14623061-14623497	IR_569	Fvb1	14623061	14623497	437	34	20	0.294	.	AGUGGGACAUCGCUCUGGAAGGGA	8	1	0	0	1	7	25	24	N
Fvb1:14673963-14674370	IR_570	Fvb1	14673963	14674370	408	330	76	0.212	.	AUGGACUCAUCUCUAUAUAAGAGA	208	3	2	8	6	20	291	24	N
Fvb1:14678410-14678773	IR_571	Fvb1	14678410	14678773	364	611	235	0.601	.	AAACCAUAAGGACUAAAUAGAUGU	31	10	7	22	11	76	485	24	N
Fvb1:14708623-14709320	IR_572	Fvb1	14708623	14709320	698	16	14	0.625	.	ACCGGGUGAAUGAUUGUUGGAUUA	3	2	0	0	0	1	13	24	N
Fvb1:14757632-14758328	IR_573	Fvb1	14757632	14758328	697	38	27	0.553	.	ACCAAUAUGAGGAGGAUCCAUGAC	7	0	0	0	1	8	29	24	N
Fvb1:14790283-14790483	IR_574	Fvb1	14790283	14790483	201	9	5	0.778	.	AGUCUGUGACUUUAGCCGACGACU	4	0	0	0	0	0	9	24	N
Fvb1:14794810-14795240	IR_575	Fvb1	14794810	14795240	431	20	16	0.6	.	AUUCGUCGGUUAAAAUACUUUAGC	4	0	2	0	0	0	18	24	N
Fvb1:14835803-14836209	IR_576	Fvb1	14835803	14836209	407	16	13	0.188	-	ACGGACUGUAUAUAUGUAUAUAGC	2	0	0	0	1	3	12	24	N
Fvb1:14856470-14857168	IR_577	Fvb1	14856470	14857168	699	88	64	0.318	.	UACCAUUUUUACCGUCGUCGAAUU	7	4	1	3	1	14	65	24	N
Fvb1:14969671-14970099	IR_578	Fvb1	14969671	14970099	429	122	67	0.475	.	AUAGGGACCAACAAACUGAACGGU	19	2	6	4	3	19	88	24	N
Fvb1:14970106-14970519	IR_579	Fvb1	14970106	14970519	414	143	90	0.378	.	AAUCACAUCAAUCUUUGAAUGCCU	26	3	3	9	4	20	104	24	N
Fvb1:14970602-14971040	IR_580	Fvb1	14970602	14971040	439	177	56	0.701	.	AAAUCAACGAACAGACUGUAAAUC	53	2	3	10	0	10	152	24	N
Fvb1:14971131-14971714	IR_581	Fvb1	14971131	14971714	584	98	54	0.541	.	GAGGUAUCAAACUGAUUUUAGACU	10	1	1	6	1	19	70	24	N
Fvb1:14986123-14986515	IR_582	Fvb1	14986123	14986515	393	239	143	0.582	.	ACACACACACAAUGCUGAUCAGGU	13	11	5	9	6	39	169	24	N
Fvb1:14986522-14986974	IR_583	Fvb1	14986522	14986974	453	1041	275	0.173	-	AAGGCACUCAAACUCGAUUAAACC	263	18	15	23	29	84	872	24	N
Fvb1:14986986-14987433	IR_584	Fvb1	14986986	14987433	448	1935	332	0.796	.	AAUCCGCACUGUAAGAAUAAAUGC	341	52	38	73	41	302	1429	24	N
Fvb1:15093251-15093615	IR_585	Fvb1	15093251	15093615	365	103	65	0.359	.	AUUUGUUUAGUCCUUGUGGUUUGA	9	2	1	7	2	20	71	24	N
Fvb1:15121734-15121907	IR_586	Fvb1	15121734	15121907	174	1097	230	0.606	.	AGUGAGGACUUUCAAAUGAACAGU	72	79	12	35	25	237	709	24	N
Fvb1:15123882-15124362	IR_587	Fvb1	15123882	15124362	481	59	46	0.542	.	AUUGGAGGUUUAGACAUGCGCGGC	5	0	0	0	3	5	51	24	N
Fvb1:15146934-15147368	IR_588	Fvb1	15146934	15147368	435	132	56	0.674	.	CUCCACCGUUCAGUUUGUAGAACC	52	5	0	5	0	17	105	24	N
Fvb1:15147372-15147696	IR_589	Fvb1	15147372	15147696	325	249	83	0.88	+	GAUGAACCGGACAGAAUUCAGUCC	69	19	6	40	18	33	133	24	N
Fvb1:15148518-15149086	IR_590	Fvb1	15148518	15149086	569	69	41	0.58	.	AGACAUUUGUAGCCAAGAAGCCCU	10	7	1	6	3	12	40	24	N
Fvb1:15208635-15208914	IR_591	Fvb1	15208635	15208914	280	134	91	0.701	.	AGGGACGUCCGCCUCUGAUCCGGA	9	8	4	8	5	19	90	24	N
Fvb1:15288629-15288884	IR_592	Fvb1	15288629	15288884	256	29	27	0.276	.	AGCUGAAAAUUUGUAGGGAUGAUC	2	0	0	0	1	3	25	24	N
Fvb1:15384007-15384369	IR_593	Fvb1	15384007	15384369	363	6	5	0.833	+	GAAAUAUUUUAUAUUUCGUCGGCU	2	0	0	1	0	0	5	24	N
Fvb1:15385934-15386332	IR_594	Fvb1	15385934	15386332	399	5	4	0.8	+	GGUUGUAUAUAUGCGGACGUCCGC	2	0	0	0	0	0	5	24	N
Fvb1:15386136-15386499	IR_595	Fvb1	15386136	15386499	364	113	26	0.956	+	ACAUGAACCGGACAGAAUUCAGUC	61	1	1	15	1	8	87	24	N
Fvb1:15386582-15387278	IR_596	Fvb1	15386582	15387278	697	724	208	0.314	.	ACUGGAAUUCGGAGGACUCGCC	62	28	5	80	106	168	337	24	N
Fvb1:15420812-15421207	IR_598	Fvb1	15420812	15421207	396	283	114	0.76	.	AACCAGAAUCGUUCGACAACUUAA	70	22	5	6	7	31	212	24	N
Fvb1:15442366-15442683	IR_599	Fvb1	15442366	15442683	318	46	33	0.457	.	AAACUGGAAUUCGGCGGACUCGCC	6	3	1	3	1	3	35	24	N
Fvb1:15469601-15470034	IR_600	Fvb1	15469601	15470034	434	23	13	0.174	-	AUUCGUCGGCUAAAGUAUUUUAGC	9	0	0	1	1	2	19	24	N
Fvb1:15475084-15475326	IR_601	Fvb1	15475084	15475326	243	7	6	0.714	.	AUUCGUCGGCUAAAGUUUGGCAGA	2	0	0	0	0	0	7	24	N
Fvb1:15535119-15535299	IR_602	Fvb1	15535119	15535299	181	111	43	0.541	.	AUCCAACGGUAAAUGAACAUGAUU	14	2	2	2	1	27	77	24	N
Fvb1:15553057-15553755	IR_603	Fvb1	15553057	15553755	699	13	8	0.538	.	AAAACUAUCAUUGAUUCACCCCUU	4	0	1	1	0	3	8	24	N
Fvb1:15557583-15557943	IR_604	Fvb1	15557583	15557943	361	297	83	0.68	.	AACGGGACACCGCUCUGGAAGGAA	37	0	2	6	5	14	270	24	N
Fvb1:15562990-15563400	IR_605	Fvb1	15562990	15563400	411	105	80	0.571	.	GUCUUCGUCGACGUCGGACGGUGA	5	8	0	5	4	16	72	24	N
Fvb1:15575622-15575962	IR_606	Fvb1	15575622	15575962	341	225	124	0.32	.	GUCAUCAGCGCCGGACGGUAGAGA	19	12	4	7	3	25	174	24	N
Fvb1:15577682-15578137	IR_607	Fvb1	15577682	15578137	456	311	165	0.447	.	AUUCUGUCGAACUUCAACCGUUCA	23	8	12	14	8	52	217	24	N
Fvb1:15622632-15623036	IR_608	Fvb1	15622632	15623036	405	173	85	0.584	.	AUCCAAAUUGAUGAUUGUUAAGAU	12	1	0	4	4	14	150	24	N
Fvb1:15631822-15632220	IR_609	Fvb1	15631822	15632220	399	74	33	0.581	.	CCGGACGACAGCACAGGCUUCC	15	2	0	16	19	4	33	24	N
Fvb1:15634325-15634787	IR_610	Fvb1	15634325	15634787	463	39	23	0.923	+	UAAGAUAUGAACGGUGGAGAUG	13	3	4	1	14	1	16	24	N
Fvb1:15635031-15635728	IR_611	Fvb1	15635031	15635728	698	13	12	0.462	.	CUAAACUCAAAGAACAGUAUAAGA	2	1	0	1	0	2	9	24	N
Fvb1:15637867-15638247	IR_612	Fvb1	15637867	15638247	381	358	205	0.606	.	AGCUGCUGGAGUUCGCUGGGGUGG	22	21	0	45	26	42	224	24	N
Fvb1:15638256-15638658	IR_613	Fvb1	15638256	15638658	403	542	219	0.561	.	AUAGAAAUCCGCACCAAAACUUUG	38	27	5	27	36	82	365	24	N
Fvb1:15639206-15639406	IR_614	Fvb1	15639206	15639406	201	299	99	0.478	.	AAUCACCGUUGGAUGUAAAUUCAU	70	8	3	9	6	33	240	24	N
Fvb1:15639472-15639932	IR_615	Fvb1	15639472	15639932	461	253	113	0.561	.	AUAUAGACCUAAGAUAUGAACGGU	20	10	5	9	6	41	182	24	N
Fvb1:15707427-15708124	IR_616	Fvb1	15707427	15708124	698	235	135	0.468	.	AGACAUGUUGUGAUUCCGAUGACU	16	6	5	8	10	39	167	24	N
Fvb1:15708271-15708960	IR_617	Fvb1	15708271	15708960	690	121	68	0.496	.	AGUAGACACGUUGUGAUUCCAAUG	30	10	2	1	2	10	96	24	N
Fvb1:15738365-15738679	IR_618	Fvb1	15738365	15738679	315	215	92	0.484	.	AUAGUCAUUGUAGUUUGAAAUCGA	24	8	3	1	4	26	173	24	N
Fvb1:15776083-15776383	IR_619	Fvb1	15776083	15776383	301	37	32	0.486	.	AUUCGUCGGCUAAGAUGGUUUAGC	5	1	2	2	1	4	27	24	N
Fvb1:15802384-15802679	IR_620	Fvb1	15802384	15802679	296	41	14	0.78	.	AGGGACUAACAUGAAUUCACCUCU	21	1	0	0	0	2	38	24	N
Fvb1:15806488-15806774	IR_621	Fvb1	15806488	15806774	287	97	49	0.515	.	UCUGGCCGGAAAACUGGAAUUCGG	12	6	1	16	3	4	67	24	N
Fvb1:15809240-15809938	IR_622	Fvb1	15809240	15809938	699	86	59	0.384	.	UUAUCGGAAAUGUAAUUAUUGAGA	7	2	1	0	3	19	61	24	N
Fvb1:15845656-15846264	IR_623	Fvb1	15845656	15846264	609	43	37	0.558	.	GGAAAUAAUAAGGAUCGAACUUCU	2	1	0	3	2	12	25	24	N
Fvb1:15846510-15847011	IR_624	Fvb1	15846510	15847011	502	24	14	0.75	.	AGGGCCAUGUAUAUAUAUUACUCU	5	0	0	0	1	5	18	24	N
Fvb1:15853812-15854215	IR_625	Fvb1	15853812	15854215	404	216	112	0.532	.	AGCGGGACACCACUCUAGAAGGAA	17	6	7	8	15	24	156	24	N
Fvb1:15854615-15855068	IR_626	Fvb1	15854615	15855068	454	21	13	0.667	.	UAGGGAGGAUUUAAAGAGGACAUC	3	2	0	0	1	2	16	24	N
Fvb1:15870589-15871042	IR_627	Fvb1	15870589	15871042	454	66	48	0.47	.	AUAUAAGGGAUUGAGCAUUAGACU	5	2	1	3	1	4	55	24	N
Fvb1:15940727-15941425	IR_630	Fvb1	15940727	15941425	699	5	5	0.4	.	AGAAUUUGGCUGAAUCUGCUACA	1	1	0	0	0	1	3	24	N
Fvb1:15961260-15961630	IR_631	Fvb1	15961260	15961630	371	164	98	0.232	.	AUCCCCUGAAGAAUCUGUCAAAAU	23	14	4	3	4	19	120	24	N
Fvb1:15964323-15964641	IR_632	Fvb1	15964323	15964641	319	91	27	0.198	-	ACACAAGAUGAUCUAGAUAUGUCU	33	5	0	0	3	8	75	24	N
Fvb1:15989785-15990228	IR_633	Fvb1	15989785	15990228	444	67	41	0.582	.	AUUGUAGGUAUAUAUGAGUAGAUC	8	0	3	2	3	7	52	24	N
Fvb1:15994538-15994887	IR_634	Fvb1	15994538	15994887	350	132	71	0.356	.	AAAAACUAAACAGAUGUCGAAUUC	17	4	2	0	1	18	107	24	N
Fvb1:16040755-16041197	IR_635	Fvb1	16040755	16041197	443	264	97	0.708	.	AGAGAUCUCUCAUUGGAAGGGCCU	53	9	1	6	16	24	208	24	N
Fvb1:16056846-16057321	IR_636	Fvb1	16056846	16057321	476	15	11	0.333	.	AAGGACUAACAUGAUGAUCGACCU	3	0	0	0	0	0	15	24	N
Fvb1:16065163-16065551	IR_637	Fvb1	16065163	16065551	389	56	14	0.071	-	AAAGUGUAGGGACUAACAUGAAGU	37	2	0	0	0	4	50	24	N
Fvb1:16090458-16090869	IR_638	Fvb1	16090458	16090869	412	63	32	0.587	.	AGGGGGCUGAUCAUCAUAAUCUGU	9	1	0	4	6	6	46	24	N
Fvb1:16167518-16167849	IR_639	Fvb1	16167518	16167849	332	90	39	0.711	.	AGAGUAUGAGGACUGAAAUGAUGU	34	1	1	1	2	10	75	24	N
Fvb1:16185065-16185470	IR_640	Fvb1	16185065	16185470	406	10	7	0.8	+	GUGGAGGCGCGCCGUCGCCGGCA	2	0	0	0	3	3	4	24	N
Fvb1:16234138-16234819	IR_641	Fvb1	16234138	16234819	682	27	21	0.704	.	UUUGGAAUACGAUUAAGAGGAAGU	4	3	1	3	2	3	15	24	N
Fvb1:16263433-16263867	IR_642	Fvb1	16263433	16263867	435	17	9	0.353	.	GAGGUAUCAAACUGAUUUUAGACC	6	0	0	0	0	0	17	24	N
Fvb1:16297093-16297525	IR_643	Fvb1	16297093	16297525	433	454	220	0.509	.	UUGACAAAUUUGGAUCGUCCAUU	18	8	12	12	7	98	317	24	N
Fvb1:16304273-16304730	IR_644	Fvb1	16304273	16304730	458	240	59	0.183	-	AGAAUAUGAGAAUUUGGUCACGGC	68	1	1	3	2	33	200	24	N
Fvb1:16304904-16305202	IR_645	Fvb1	16304904	16305202	299	1058	273	0.71	.	GAUGAAAUUGAAAGUUUAGGGACU	195	26	14	46	26	140	806	24	N
Fvb1:16308775-16309185	IR_646	Fvb1	16308775	16309185	411	526	149	0.26	.	AAGAGAGAGACUGAAUGCACACA	52	23	4	7	13	160	319	24	N
Fvb1:16359455-16359891	IR_647	Fvb1	16359455	16359891	437	244	125	0.545	.	UAUCUAGAUACUAGACGGUGGAGA	32	12	6	24	17	39	146	24	N
Fvb1:16393384-16393746	IR_648	Fvb1	16393384	16393746	363	158	86	0.747	.	CCGGACGACAGCACAGGCUUC	11	17	2	32	19	14	74	24	N
Fvb1:16399540-16399941	IR_649	Fvb1	16399540	16399941	402	366	107	0.131	-	AUCCUUACCUGAGAAAGACUGUAU	68	7	4	27	10	58	260	24	N
Fvb1:16459840-16460538	IR_650	Fvb1	16459840	16460538	699	280	134	0.193	-	AUUGAGAAAAAGAGGACUAAACU	35	8	9	15	12	71	165	24	N
Fvb1:16469781-16470358	IR_651	Fvb1	16469781	16470358	578	122	72	0.369	.	AUAUCAAUCUUAGGUCGGGAUGGA	9	1	4	5	2	18	92	24	N
Fvb1:16492281-16492712	IR_652	Fvb1	16492281	16492712	432	480	173	0.667	.	AUUCGGUACCCAAAUGAUCUUCAU	32	16	12	26	21	90	315	24	N
Fvb1:16496171-16496352	IR_653	Fvb1	16496171	16496352	182	181	41	0.309	.	AUCCAACGGUGACUGACCAUGAAU	70	5	2	2	3	24	145	24	N
Fvb1:16496389-16496831	IR_654	Fvb1	16496389	16496831	443	25	18	0.36	.	CGGUGAAGAUGAGGAAAUUCGAUC	4	2	0	0	2	4	17	24	N
Fvb1:16496868-16497133	IR_655	Fvb1	16496868	16497133	266	79	38	0.823	+	GUGGAGGCGCCGUGUCGUCGGAGC	19	3	5	7	18	5	41	24	N
Fvb1:16497148-16497579	IR_656	Fvb1	16497148	16497579	432	427	161	0.335	.	CGAGAAGGGCUGUAUAUAUAUAUA	43	16	7	28	7	77	292	24	N
Fvb1:16532562-16533100	IR_657	Fvb1	16532562	16533100	539	97	71	0.577	.	AGAUUGGGGAACAUCUGGUCAGGA	7	3	1	5	4	12	72	24	N
Fvb1:16588278-16588599	IR_658	Fvb1	16588278	16588599	322	47	29	0.574	.	AAACUGGAUGACUGAUCACUGACU	5	0	0	0	0	6	41	24	N
Fvb1:16636154-16636464	IR_659	Fvb1	16636154	16636464	311	83	56	0.47	.	AACCGUACGUUCUUUUAACUCUAA	9	1	3	2	2	13	62	24	N
Fvb1:16646501-16646940	IR_660	Fvb1	16646501	16646940	440	198	96	0.803	+	AGGAGAGAACCAUCCUGGAAGCCU	12	23	0	38	14	21	102	24	N
Fvb1:16680943-16681387	IR_662	Fvb1	16680943	16681387	445	161	73	0.311	.	UCCGGACUCUAUAUAUAUAUAUA	20	3	4	15	7	44	88	24	N
Fvb1:16689774-16690207	IR_663	Fvb1	16689774	16690207	434	32	27	0.375	.	CUGAGAAUUCCUGUAUAUAUAUAU	4	3	1	0	0	2	26	24	N
Fvb1:16690212-16690600	IR_664	Fvb1	16690212	16690600	389	57	29	0.684	.	AUUAUCUAGAUACUAGACGGUGGA	14	1	1	5	4	5	41	24	N
Fvb1:16727437-16727917	IR_665	Fvb1	16727437	16727917	481	328	119	0.759	.	GAUGAACCGGACAGAAUUCAGUC	65	18	16	41	13	92	148	24	N
Fvb1:16727966-16728239	IR_666	Fvb1	16727966	16728239	274	459	194	0.671	.	GUCUGUCGAAUUCCAGUUUUUCGG	42	36	17	42	13	17	334	24	N
Fvb1:16728497-16728963	IR_667	Fvb1	16728497	16728963	467	282	102	0.613	.	AUAGGAACUGUAUAUAUAUAUAUA	30	10	8	4	14	47	199	24	N
Fvb1:16729016-16729447	IR_668	Fvb1	16729016	16729447	432	20	18	0.35	.	CCAAUUUGGUGAUUGUUAAGGCCC	2	1	1	2	1	3	12	24	N
Fvb1:16729452-16729844	IR_669	Fvb1	16729452	16729844	393	168	61	0.274	.	GAUGAACCGGACAGAAUUCAGUCC	54	4	2	11	10	18	123	24	N
Fvb1:16741441-16741843	IR_671	Fvb1	16741441	16741843	403	144	79	0.583	.	ACCCAAAUUGAUAAUCGUUAAAGC	21	4	3	5	4	14	114	24	N
Fvb1:16741849-16742273	IR_672	Fvb1	16741849	16742273	425	150	88	0.753	.	AUUCGGCCUGUAUAUAUAUAUAUA	23	13	1	10	7	22	97	24	N
Fvb1:16742280-16742668	IR_673	Fvb1	16742280	16742668	389	228	117	0.553	.	CUCGAGUUUUUCUGGUAUGAACAC	32	11	7	18	7	33	152	24	N
Fvb1:16742681-16743135	IR_674	Fvb1	16742681	16743135	455	402	148	0.398	.	UUUCCACCGUCUAGACUUUAGAUA	97	10	4	5	11	82	290	24	N
Fvb1:16820274-16820720	IR_677	Fvb1	16820274	16820720	447	251	115	0.418	.	AAUUGGCUGAAAUUUUGCAGAGAU	55	4	1	16	15	28	187	24	N
Fvb1:16837086-16837413	IR_678	Fvb1	16837086	16837413	328	92	60	0.717	.	GACGGAAUGAUCAUUUGGAAGGAA	7	3	1	3	3	19	63	24	N
Fvb1:16840399-16840822	IR_680	Fvb1	16840399	16840822	424	274	103	0.5	.	GAUGAACCGGACAGAAUUCAGUCC	54	6	2	36	60	29	141	24	N
Fvb1:16862785-16863217	IR_682	Fvb1	16862785	16863217	433	221	98	0.48	.	CACCGUAAGAAGAAAUGUAGACAU	17	7	3	11	6	27	167	24	N
Fvb1:16868785-16869248	IR_683	Fvb1	16868785	16869248	464	72	37	0.5	.	AGUAUCUAAAUACUAGACGGUGGA	23	6	2	2	1	5	56	24	N
Fvb1:16869265-16869629	IR_684	Fvb1	16869265	16869629	365	232	112	0.677	.	GAACACAACCGGACAAAAUUCAGU	24	4	3	18	21	27	159	24	N
Fvb1:16880644-16881341	IR_685	Fvb1	16880644	16881341	698	86	54	0.733	.	AGAGAACGUCAGAGAACAAUCAGA	8	1	3	3	4	11	64	24	N
Fvb1:16886004-16886476	IR_686	Fvb1	16886004	16886476	473	253	127	0.68	.	AUGCGCGACUGAUGAAAAUUGAGA	27	5	3	17	6	34	188	24	N
Fvb1:16924944-16925286	IR_688	Fvb1	16924944	16925286	343	404	255	0.567	.	AACUGGAAUUCAACGGACUCGCCG	12	33	5	47	29	50	240	24	N
Fvb1:16943531-16943964	IR_689	Fvb1	16943531	16943964	434	117	48	0.556	.	CUAGAUACUAGACGGUGGAGA	20	1	1	34	3	8	70	24	N
Fvb1:16993255-16993456	IR_690	Fvb1	16993255	16993456	202	6	5	0.333	.	UCUCGUCGGCUAAAGUCUGUGACU	2	0	0	0	0	0	6	24	N
Fvb1:17005910-17006351	IR_691	Fvb1	17005910	17006351	442	70	48	0.643	.	AUAUGAUUUGGUGAUCGUUAAGGC	7	1	6	2	6	5	50	24	N
Fvb1:17119504-17119915	IR_693	Fvb1	17119504	17119915	412	67	44	0.194	-	CUUUAAACCGAGUGCGGACAGUCC	9	7	0	7	4	5	44	24	N
Fvb1:17119916-17120311	IR_694	Fvb1	17119916	17120311	396	26	16	0.192	-	AAUGCUGAUCAGGUGCGGACGUCU	5	1	0	3	2	3	17	24	N
Fvb1:17157923-17158432	IR_695	Fvb1	17157923	17158432	510	372	177	0.503	.	AGAAAAUGGACUAACAUGAUGGUC	20	13	3	6	9	42	299	24	N
Fvb1:17181372-17181486	IR_696	Fvb1	17181372	17181486	115	14	10	0.786	.	AUUGUGCACGAGAAAAUAGAAGAA	4	1	0	0	0	1	12	24	N
Fvb1:17221934-17222185	IR_697	Fvb1	17221934	17222185	252	737	166	0.227	.	AGAGAAACUGCUAGAAAAGAUACA	355	18	8	24	5	61	621	24	N
Fvb1:17273355-17273735	IR_698	Fvb1	17273355	17273735	381	98	61	0.827	+	AGGGACGUUAGAACUUUAAGGCCU	16	6	3	10	8	11	60	24	N
Fvb1:17274442-17274850	IR_699	Fvb1	17274442	17274850	409	117	40	0.385	.	GCGGACGUCCUCUUUAGAAUGCCU	37	1	0	3	1	6	106	24	N
Fvb1:17274851-17275466	IR_700	Fvb1	17274851	17275466	616	278	136	0.543	.	AGAAGCGGACGUCCCUCCGGCGCC	22	17	6	29	24	17	185	24	N
Fvb1:17275470-17275901	IR_701	Fvb1	17275470	17275901	432	839	240	0.541	.	ACAAAUGGACGGACUGAAUUCUGU	221	34	1	89	60	81	574	24	N
Fvb1:17282863-17283560	IR_702	Fvb1	17282863	17283560	698	31	23	0.29	.	ACCCACUUAGUUGAAGGACACAUG	6	0	0	1	2	4	24	24	N
Fvb1:17292017-17292420	IR_703	Fvb1	17292017	17292420	404	26	24	0.462	.	AUCUUCACUGUCGAGUAUUUAGAU	2	0	0	1	1	4	20	24	N
Fvb1:17312731-17313139	IR_704	Fvb1	17312731	17313139	409	102	48	0.324	.	AAUUCAAACGGAAUAUGAGAAUUU	15	13	1	2	1	8	77	24	N
Fvb1:17337523-17337912	IR_705	Fvb1	17337523	17337912	390	264	176	0.595	.	UCCAGUUUUCCGGCGAGAUCGACU	8	13	6	27	31	25	162	24	N
Fvb1:17337963-17338253	IR_706	Fvb1	17337963	17338253	291	728	74	0.94	+	AAGGCACUCAAACUCGAUUAAACC	550	2	3	1	3	22	697	24	N
Fvb1:17338330-17338718	IR_707	Fvb1	17338330	17338718	389	124	70	0.54	.	AUCCGGCCUAUAUAUAUAUAUCUC	10	4	0	6	15	16	83	24	N
Fvb1:17367465-17367868	IR_708	Fvb1	17367465	17367868	404	493	224	0.314	.	AGAGACGGACUAUAUAUAUAUAUU	36	44	10	51	32	122	234	24	N
Fvb1:17400343-17400705	IR_709	Fvb1	17400343	17400705	363	72	52	0.403	.	ACUGAAACUGUUCAACUUGAACC	4	1	1	1	1	11	57	24	N
Fvb1:17400767-17401200	IR_710	Fvb1	17400767	17401200	434	290	43	0.941	+	AGACGGACUGUAUAUAUAUAUAUA	129	0	11	2	1	31	245	24	N
Fvb1:17401206-17401609	IR_711	Fvb1	17401206	17401609	404	190	94	0.468	.	AGUGAAGCUUCGCUCUGGAUAGGA	16	5	1	5	1	16	162	24	N
Fvb1:17412502-17413077	IR_712	Fvb1	17412502	17413077	576	113	77	0.584	.	AACGCUGAUCGACCGUUAGAUCUG	9	2	1	3	3	6	98	24	N
Fvb1:17441910-17442485	IR_713	Fvb1	17441910	17442485	576	205	107	0.424	.	UUUGUAAUGCUGACUGUUAGAUCU	14	6	1	8	4	28	158	24	N
Fvb1:17460636-17461037	IR_714	Fvb1	17460636	17461037	402	119	68	0.479	.	CCGGAUCAGGAGCAGACGUCC	10	11	3	24	7	11	63	24	N
Fvb1:17462330-17462942	IR_715	Fvb1	17462330	17462942	613	3	2	1	+	AAACAGUAGCUCCAAUGCCAUAAU	2	0	0	0	0	0	3	24	N
Fvb1:17483777-17484111	IR_716	Fvb1	17483777	17484111	335	208	109	0.37	.	AAUGUAGGGACUAACAUGAAGUCA	14	2	2	2	2	21	179	24	N
Fvb1:17500473-17500898	IR_717	Fvb1	17500473	17500898	426	413	96	0.78	.	AACAUAACCGGACAGAAUUCAGUC	169	11	3	31	11	37	320	24	N
Fvb1:17511728-17512178	IR_718	Fvb1	17511728	17512178	451	1141	160	0.86	+	ACUAAAUUGAACUUUUGAAAGCCU	721	12	16	51	27	103	932	24	N
Fvb1:17542968-17543654	IR_719	Fvb1	17542968	17543654	687	417	147	0.813	+	AUCCUCCAAAGUCUGAAUAGUCCU	190	13	5	24	18	25	332	24	N
Fvb1:17570571-17571216	IR_720	Fvb1	17570571	17571216	646	107	55	0.467	.	UGAAUGGUAUACGAACUUUCACU	16	2	1	5	1	31	67	24	N
Fvb1:17594433-17594877	IR_721	Fvb1	17594433	17594877	445	37	26	0.595	.	AUCUAGAUCAUCUUGUGUAGAUC	4	3	2	2	1	8	21	24	N
Fvb1:17634830-17635527	IR_723	Fvb1	17634830	17635527	698	18	14	0.222	.	AUAAGCUGAGGAACCAUUAAAAUG	4	2	0	0	1	2	13	24	N
Fvb1:17674024-17674430	IR_724	Fvb1	17674024	17674430	407	6	6	0	-	UUUGAAUAAAGAAGGAGGUUU	1	0	0	1	1	1	3	24	N
Fvb1:17709245-17709633	IR_725	Fvb1	17709245	17709633	389	212	124	0.382	.	AAACUGGAAUUCGGAGGACUGACC	15	14	1	21	8	18	150	24	N
Fvb1:17710790-17711488	IR_726	Fvb1	17710790	17711488	699	55	44	0.673	.	GUCGGAGAACAAUCAAAUCGGGAU	4	8	0	1	0	3	43	24	N
Fvb1:17725382-17725774	IR_727	Fvb1	17725382	17725774	393	18	13	0.889	+	CGGCGGAGAGCAUGGACUGGACCA	3	1	1	1	0	3	12	24	N
Fvb1:17746480-17747080	IR_729	Fvb1	17746480	17747080	601	87	54	0.402	.	UCUUAAGAAUUGACACAUCACUGU	7	5	3	1	0	8	70	24	N
Fvb1:17799140-17799468	IR_730	Fvb1	17799140	17799468	329	265	120	0.302	.	ACUCGCCGGAAAACUGGAAUUCGG	20	16	3	12	12	28	194	24	N
Fvb1:17800064-17800495	IR_733	Fvb1	17800064	17800495	432	33	19	0.606	.	AGUAUCUAAAUACUAGACGGUGGA	7	0	0	1	0	4	28	24	N
Fvb1:17840052-17840371	IR_734	Fvb1	17840052	17840371	320	1073	272	0.657	.	GAAACUGGAAUUCGGCGGACUCGC	127	86	22	160	186	158	461	24	N
Fvb1:17856660-17857000	IR_735	Fvb1	17856660	17857000	341	355	195	0.634	.	UCCAGACAACAUCGAUUCGGCAGA	20	26	23	36	30	36	204	24	N
Fvb1:17864561-17865014	IR_736	Fvb1	17864561	17865014	454	49	26	0.878	+	AAGGGGGCUGUAUAUAUAUAUAUA	10	1	0	1	1	18	28	24	N
Fvb1:17927614-17928027	IR_737	Fvb1	17927614	17928027	414	236	118	0.347	.	AACUGGAAUUCGGCGGACUCGCUG	16	5	3	66	9	14	139	24	N
Fvb1:17985000-17985397	IR_739	Fvb1	17985000	17985397	398	117	57	0.444	.	AAGGGCCCUGUAUGUAUAUAUAUA	19	1	0	5	4	20	87	24	N
Fvb1:17985408-17985769	IR_740	Fvb1	17985408	17985769	362	33	18	0.242	.	AAGGAUAUUUGGACCUGAUAAUAU	9	0	0	0	0	3	30	24	N
Fvb1:17985797-17986238	IR_741	Fvb1	17985797	17986238	442	115	34	0.896	+	AAAAUAGGGAUCCCUCAUUGGAAG	22	2	1	6	2	7	97	24	N
Fvb1:17986246-17986598	IR_742	Fvb1	17986246	17986598	353	158	80	0.481	.	AUUGCGGACGUCCGCACCUGAGAA	31	8	1	11	11	12	115	24	N
Fvb1:17986338-17986863	IR_743	Fvb1	17986338	17986863	526	198	105	0.475	.	AAAACUGGAAUUCAGCGGACUCGC	22	8	2	12	7	22	147	24	N
Fvb1:17986876-17987377	IR_744	Fvb1	17986876	17987377	502	653	288	0.507	.	GAUCCGGACUGUAUAUAUAUAUA	43	43	26	52	46	119	367	24	N
Fvb1:18028479-18028905	IR_745	Fvb1	18028479	18028905	427	193	97	0.399	.	AUGAGGACCACUAAGUUGAAGACU	23	8	4	1	5	19	156	24	N
Fvb1:18050379-18050772	IR_746	Fvb1	18050379	18050772	394	237	99	0.903	+	UUGUCGCCGGCCAGUUCUGGA	27	8	1	55	34	13	126	24	N
Fvb1:18121544-18121967	IR_747	Fvb1	18121544	18121967	424	18	16	0.5	.	UGAGUUUGGAUCGCUGAGAUU	2	0	0	2	1	3	12	24	N
Fvb1:18122098-18122523	IR_748	Fvb1	18122098	18122523	426	29	23	0.621	.	ACGAAGCUUCGCUCUGAAUAGGAA	4	1	1	1	0	2	24	24	N
Fvb1:18122524-18122876	IR_749	Fvb1	18122524	18122876	353	190	82	0.4	.	AAUUACGGAAGCUCAAAUGAUCUC	53	4	1	4	11	20	150	24	N
Fvb1:18138079-18138630	IR_750	Fvb1	18138079	18138630	552	24	15	0.583	.	AUUCGUCGGUUAAAAUACUUUAGC	6	0	0	0	0	1	23	24	N
Fvb1:18143788-18143981	IR_751	Fvb1	18143788	18143981	194	2	2	0.5	.	AAAAGUCGUCGGCUAUAGUCCAGA	1	0	0	0	0	0	2	24	N
Fvb1:18150556-18151254	IR_752	Fvb1	18150556	18151254	699	97	62	0.443	.	GAGGAUCGAUGUGUAGUAGAUAUA	14	5	1	5	3	11	72	24	N
Fvb1:18176111-18176551	IR_753	Fvb1	18176111	18176551	441	797	214	0.332	.	CGUACGGUGGCAAACGGAGGGACG	144	47	8	59	30	141	512	24	N
Fvb1:18194242-18194648	IR_754	Fvb1	18194242	18194648	407	174	107	0.695	.	AGAUGGAAUUUCAGCAAUUGGGCA	12	19	0	4	5	26	120	24	N
Fvb1:18200898-18201416	IR_755	Fvb1	18200898	18201416	519	261	160	0.372	.	AAGGUUAGGGAUUGUGAUGGGAAC	10	8	4	9	6	41	193	24	N
Fvb1:18224686-18225153	IR_756	Fvb1	18224686	18225153	468	36	33	0.528	.	GCGGACCAAGAUUGGCUGGUC	2	2	1	3	0	3	27	24	N
Fvb1:18227947-18228389	IR_757	Fvb1	18227947	18228389	443	46	30	0.804	+	ACAUAAUUUUGUCGAACUUGAACC	7	0	0	1	0	5	40	24	N
Fvb1:18228391-18228791	IR_758	Fvb1	18228391	18228791	401	99	41	0.596	.	AAAUACGGACAUCCGCACCUGAGA	16	1	2	5	3	9	79	24	N
Fvb1:18228817-18229231	IR_759	Fvb1	18228817	18229231	415	125	41	0.24	.	AAAUCAAUGAACGGACUAUAAAUC	55	2	4	6	1	13	99	24	N
Fvb1:18244019-18244454	IR_760	Fvb1	18244019	18244454	436	597	162	0.658	.	CACGUCAGACUGCCACGUGGUCCU	53	17	15	5	16	107	437	24	N
Fvb1:18259507-18259858	IR_761	Fvb1	18259507	18259858	352	531	302	0.52	.	AAAAUCGAUCUCGCCGGAAACUGG	19	34	8	77	51	44	317	24	N
Fvb1:18295344-18295841	IR_762	Fvb1	18295344	18295841	498	384	152	0.393	.	AGAAGGACUAACAUGAUGAUCGAC	45	7	3	10	5	41	318	24	N
Fvb1:18322653-18323146	IR_763	Fvb1	18322653	18323146	494	1	1	0	-	AUCCGCACCCGCAGCCGCAGCCGA	1	0	0	0	0	0	1	24	N
Fvb1:18337220-18337917	IR_764	Fvb1	18337220	18337917	698	1160	432	0.596	.	CCGAUACUGUCCAAACUUAACCAU	118	32	15	43	26	150	894	24	N
Fvb1:18352598-18353043	IR_765	Fvb1	18352598	18353043	446	156	69	0.718	.	GCGGACGUCCGUAUCUGAAACGGA	34	6	2	12	3	11	122	24	N
Fvb1:18356322-18356612	IR_767	Fvb1	18356322	18356612	291	758	292	0.369	.	AGUUUCGGGACUAACAUGAAUUCA	34	24	9	38	14	119	554	24	N
Fvb1:18365965-18366414	IR_768	Fvb1	18365965	18366414	450	45	20	0.778	.	AUAUGAUUUGGUGAUCGUUAAGGC	14	2	0	6	0	1	36	24	N
Fvb1:18371416-18371825	IR_769	Fvb1	18371416	18371825	410	51	32	0.294	.	AGAGACGUCCGCACUUUAAGGCCU	9	5	0	2	6	6	32	24	N
Fvb1:18371850-18372171	IR_770	Fvb1	18371850	18372171	322	57	38	0.333	.	AUGCAUUUCACACAAUUCGGCACC	4	1	1	1	1	6	47	24	N
Fvb1:18372195-18372631	IR_771	Fvb1	18372195	18372631	437	110	45	0.5	.	AAAGUAGAAAUCCGCACCGUAAGA	29	1	2	5	1	3	98	24	N
Fvb1:18372643-18373196	IR_772	Fvb1	18372643	18373196	554	85	49	0.4	.	UUCUGUUAUAAACAUGAACGGUGC	7	3	0	1	3	27	51	24	N
Fvb1:18381128-18381825	IR_773	Fvb1	18381128	18381825	698	100	58	0.18	-	AAAAUUGAGAGUGGACUGUUUGUC	27	11	1	2	1	12	73	24	N
Fvb1:18406168-18406529	IR_774	Fvb1	18406168	18406529	362	58	31	0.534	.	ACUAUAUUUCGUCGGCUAAACCUU	9	3	5	1	1	7	41	24	N
Fvb1:18427790-18428081	IR_775	Fvb1	18427790	18428081	292	1859	470	0.405	.	AUAAGGACUGAACAGAUGUCGGCU	314	57	25	45	37	185	1510	24	N
Fvb1:18475296-18475590	IR_776	Fvb1	18475296	18475590	295	191	93	0.733	.	CGCCGGAGGGUGGAGAACGGACGG	29	22	0	24	16	13	116	24	N
Fvb1:18481431-18481740	IR_777	Fvb1	18481431	18481740	310	2	2	1	+	AAGGGUUUCUCUCUUAGGUGACGA	1	0	0	0	0	0	2	24	N
Fvb1:18503183-18503881	IR_778	Fvb1	18503183	18503881	699	28	26	0.214	.	CAAAAAUGUCAUUUAACUCACU	3	1	1	2	6	5	13	24	N
Fvb1:18550435-18550629	IR_779	Fvb1	18550435	18550629	195	12	7	0.833	+	AAUUGCGACUAAGAUGAAGAAUCU	4	1	0	1	0	0	10	24	N
Fvb1:18604967-18605377	IR_780	Fvb1	18604967	18605377	411	192	84	0.432	.	UCAGUCCGUCCAUUUGUUUUUCGA	18	3	1	5	19	43	121	24	N
Fvb1:18645910-18646366	IR_781	Fvb1	18645910	18646366	457	116	70	0.621	.	ACACAAAGCUGAUCAGGUGCGGAC	11	4	3	29	10	9	61	24	N
Fvb1:18658960-18659339	IR_782	Fvb1	18658960	18659339	380	896	353	0.474	.	CACUAAAGCUGUUGGAACUGAGAA	42	37	14	74	47	120	604	24	N
Fvb1:18677474-18677733	IR_783	Fvb1	18677474	18677733	260	32	21	0.281	.	CUCCACUGUACGGCUCCGACGACG	5	1	0	7	1	3	20	24	N
Fvb1:18677543-18678070	IR_784	Fvb1	18677543	18678070	528	215	70	0.637	.	ACUGGAAUUCGGCGGACUCGC	39	17	1	61	6	46	84	24	N
Fvb1:18678072-18678728	IR_785	Fvb1	18678072	18678728	657	139	97	0.424	.	GAGAAGAAACGUCGUCGUCGGCGC	7	5	1	12	4	14	103	24	N
Fvb1:18700970-18701381	IR_788	Fvb1	18700970	18701381	412	402	144	0.418	.	GGACUGAAUUCUGUCCGGUUGUGU	91	21	2	11	8	57	303	24	N
Fvb1:18706024-18706411	IR_789	Fvb1	18706024	18706411	388	174	59	0.224	.	AUGGGGACUGAAAUGAUGUUAACC	71	2	0	2	7	19	144	24	N
Fvb1:18788166-18788525	IR_790	Fvb1	18788166	18788525	360	605	207	0.499	.	ACGUGAUACCCGAACUCUAAAAAG	37	19	12	17	21	81	455	24	N
Fvb1:18867616-18868009	IR_791	Fvb1	18867616	18868009	394	441	127	0.522	.	AUCAGUCGGGUCCAAUUUUUAAAU	58	8	5	4	7	49	368	24	N
Fvb1:18906380-18906622	IR_792	Fvb1	18906380	18906622	243	38	32	0.632	.	GUCGGCUAAAGUUUGGACUAUAGC	3	2	0	3	2	2	29	24	N
Fvb1:18911665-18912098	IR_793	Fvb1	18911665	18912098	434	10	7	0.4	.	GAAAUACACUAUAAUUCGUCGGCU	2	0	0	0	0	0	10	24	N
Fvb1:18934443-18934831	IR_794	Fvb1	18934443	18934831	389	68	46	0.515	.	AUCCAAAUUGAUGAUCGUUAAAGU	6	5	1	9	2	10	41	24	N
Fvb1:18937517-18937954	IR_795	Fvb1	18937517	18937954	438	194	126	0.629	.	ACUCGAAAAACAAAUUGACGGACU	9	8	4	17	11	22	132	24	N
Fvb1:18945568-18946090	IR_796	Fvb1	18945568	18946090	523	906	336	0.458	.	ACCUUGUUCUGUGUAGAUCAGCCU	39	41	34	41	29	180	581	24	N
Fvb1:19025879-19026577	IR_798	Fvb1	19025879	19026577	699	136	58	0.154	-	AAAAGAGAGUGUAGAAUGUAAAAU	56	2	0	2	3	7	122	24	N
Fvb1:19106801-19107194	IR_799	Fvb1	19106801	19107194	394	828	290	0.429	.	AAACUGGAAUUCGGCGGACUCGUC	118	42	16	80	41	68	581	24	N
Fvb1:19107195-19107572	IR_800	Fvb1	19107195	19107572	378	445	130	0.8	+	GCGGACGUCUGUAUCUGAAACGGA	183	9	0	28	21	43	344	24	N
Fvb1:19130269-19130503	IR_801	Fvb1	19130269	19130503	235	159	50	0.327	.	AGGGACUAAGAUGAAUUCACAUCU	39	3	1	4	1	18	132	24	N
Fvb1:19166971-19167452	IR_802	Fvb1	19166971	19167452	482	631	177	0.748	.	AUAUGAGGGAUUAAGGAUUACACC	174	24	5	19	59	71	453	24	N
Fvb1:19210663-19211078	IR_804	Fvb1	19210663	19211078	416	255	89	0.733	.	ACUGGAAUUCGGCGGACUCGC	37	11	4	43	15	33	149	24	N
Fvb1:19211081-19211474	IR_805	Fvb1	19211081	19211474	394	163	91	0.589	.	GGAAGGAGACCGUAUAUAUACUGU	11	1	4	9	6	31	112	24	N
Fvb1:19211489-19211909	IR_806	Fvb1	19211489	19211909	421	209	139	0.383	.	AGAAGCGGACGUCCACAAAAAAGU	12	9	6	3	2	31	158	24	N
Fvb1:19301593-19302086	IR_808	Fvb1	19301593	19302086	494	371	152	0.604	.	GGAUGGAGAUUGGAGGUUUGGACA	62	5	2	11	11	38	304	24	N
Fvb1:19305758-19306198	IR_809	Fvb1	19305758	19306198	441	511	242	0.603	.	AAUUACGGAAGCUCAAAUGAUAUC	22	21	8	22	11	83	366	24	N
Fvb1:19323303-19323714	IR_811	Fvb1	19323303	19323714	412	291	126	0.491	.	AAUAUUGUGUAGAUCAUCUCUGC	23	30	3	17	19	55	167	24	N
Fvb1:19324047-19324478	IR_812	Fvb1	19324047	19324478	432	185	46	0.443	.	GAUGUGGAAAUACGACCUGAAAGU	60	4	1	3	2	54	121	24	N
Fvb1:19324494-19324860	IR_813	Fvb1	19324494	19324860	367	21	18	0.524	.	AAAUGGCGAUGAUGAAACGGACAG	2	0	0	5	1	2	13	24	N
Fvb1:19343759-19344145	IR_814	Fvb1	19343759	19344145	387	25	14	0.84	+	AGUUUACCCUCAUGAGGUUUGGGA	7	1	0	0	0	4	20	24	N
Fvb1:19346048-19346746	IR_815	Fvb1	19346048	19346746	699	184	99	0.777	.	AUCAGCUUUUCUGCAGAAUUUGGC	15	5	1	10	2	20	146	24	N
Fvb1:19349910-19350418	IR_816	Fvb1	19349910	19350418	509	68	36	0.838	+	CCUAUUUUAAGCCAUUUAUAGGGA	11	4	1	12	1	13	37	24	N
Fvb1:19412126-19412598	IR_817	Fvb1	19412126	19412598	473	877	347	0.58	.	AGGUCGAUCAUCAUGUUAGUCAUU	54	35	8	32	24	140	638	24	N
Fvb1:19555423-19555906	IR_819	Fvb1	19555423	19555906	484	33	17	0.788	.	GAAGAAGGACUAACAUGAUGAUCA	5	1	3	0	1	6	22	24	N
Fvb1:19610802-19611154	IR_820	Fvb1	19610802	19611154	353	341	186	0.466	.	CACAACCCCUUAAAGUGCGGACGU	13	9	2	31	13	51	235	24	N
Fvb1:19649558-19650183	IR_821	Fvb1	19649558	19650183	626	18	16	0.556	.	AAAAUUUUUCGUCGGCUAAAGUGC	3	0	0	0	0	2	16	24	N
Fvb1:19680959-19681414	IR_822	Fvb1	19680959	19681414	456	37	11	0.73	.	AUAGGGAUCCCUCAAUGGAAGGGG	9	0	0	1	3	3	30	24	N
Fvb1:19729837-19730491	IR_823	Fvb1	19729837	19730491	655	136	66	0.64	.	AGUGACCAUUUGUGAUUUUUGCCU	20	2	1	3	1	10	119	24	N
Fvb1:19749651-19750349	IR_824	Fvb1	19749651	19750349	699	81	59	0.531	.	AUGGACGUGACGUUAUGAGGUCA	7	3	1	0	1	20	56	24	N
Fvb1:19779294-19779652	IR_825	Fvb1	19779294	19779652	359	20	10	0.2	.	GAUGAAAUUGAAAGUUUAGGGACU	10	0	1	0	1	1	17	24	N
Fvb1:19806557-19807063	IR_826	Fvb1	19806557	19807063	507	79	31	0.608	.	AUCCAAUUUCUCUGUCAAGUGAUG	27	2	1	0	3	5	68	24	N
Fvb1:19840182-19840880	IR_828	Fvb1	19840182	19840880	699	229	142	0.432	.	ACCCCGUUUCGGACUCAUUAGGCC	24	5	4	9	3	49	159	24	N
Fvb1:19850820-19851264	IR_829	Fvb1	19850820	19851264	445	9	8	0.222	.	AUUCGUCGGCUAUAGUAUUUUAGC	2	1	0	0	1	2	5	24	N
Fvb1:19856294-19856448	IR_830	Fvb1	19856294	19856448	155	42	21	0.69	.	AUAGCCGACGACUUAUACGUGUGU	6	2	0	1	0	2	37	24	N
Fvb1:19956242-19956731	IR_832	Fvb1	19956242	19956731	490	609	186	0.644	.	AAGAAGGACUAACAUGAUGAUCA	81	12	7	20	48	147	375	24	N
Fvb1:19970721-19971167	IR_833	Fvb1	19970721	19971167	447	96	52	0.521	.	AGCCAAAUUGAUAAUCGUUAAGGU	7	3	1	3	5	14	70	24	N
Fvb1:19971226-19971923	IR_834	Fvb1	19971226	19971923	698	13	10	0.769	.	UUGGCAAGUGACGUAGAAAUCAUU	4	0	1	0	0	2	10	24	N
Fvb1:19981725-19982161	IR_835	Fvb1	19981725	19982161	437	70	34	0.8	+	CAAAUCUGCCAAACCUGAACCGUU	13	3	1	6	5	6	49	24	N
Fvb1:20041297-20041977	IR_837	Fvb1	20041297	20041977	681	20	18	0.6	.	UGCUCAGUUAGACAGUUUGGUACU	2	0	0	3	1	2	14	24	N
Fvb1:20058844-20059299	IR_838	Fvb1	20058844	20059299	456	131	57	0.908	+	ACAUAAUUCUGUCGAACUUGGACC	31	1	1	2	4	28	95	24	N
Fvb1:20068954-20069373	IR_839	Fvb1	20068954	20069373	420	3221	566	0.673	.	AGGACUUGGUGAGGACUUUUCGGU	484	292	83	82	56	495	2213	24	N
Fvb1:20072540-20072926	IR_840	Fvb1	20072540	20072926	387	15	11	0.333	.	AAAGUGUAGGGACUAACAUGAAGU	4	0	0	0	2	1	12	24	N
Fvb1:20081498-20081897	IR_842	Fvb1	20081498	20081897	400	76	48	0.171	-	GAGAAUGGGGACUGAAAUGAAAUU	7	3	4	2	3	15	49	24	N
Fvb1:20087618-20088094	IR_843	Fvb1	20087618	20088094	477	69	36	0.304	.	GUAGCAGACUAGCAAGUGACUAGC	13	3	2	4	1	8	51	24	N
Fvb1:20101229-20101925	IR_844	Fvb1	20101229	20101925	697	115	80	0.504	.	AUACCAGAUCACGUUCGAAAAUUG	10	3	3	2	3	21	83	24	N
Fvb1:20102303-20102575	IR_845	Fvb1	20102303	20102575	273	119	69	0.655	.	GAUGAAAUUGAAAAUUUAGGGACU	28	6	2	1	3	15	92	24	N
Fvb1:20134277-20134462	IR_846	Fvb1	20134277	20134462	186	82	53	0.573	.	AGACUACAAUUGGCUGAGACUGAU	7	2	1	2	4	7	66	24	N
Fvb1:20145136-20145431	IR_848	Fvb1	20145136	20145431	296	131	69	0.542	.	GAUGAAAUUGAAAGUUUAGGGACU	24	3	3	1	4	14	106	24	N
Fvb1:20146413-20146604	IR_849	Fvb1	20146413	20146604	192	234	41	0.034	-	CAUCCGGCCUGUAUAAGUAUAUA	51	3	0	10	8	82	131	24	N
Fvb1:20146605-20146977	IR_850	Fvb1	20146605	20146977	373	420	148	0.252	.	CAUCCGGCCUGUAUAAGUAUAUA	51	36	6	27	17	99	235	24	N
Fvb1:20148461-20148871	IR_851	Fvb1	20148461	20148871	411	150	82	0.633	.	AUUGGACAGAAUUUUAACAAUUGU	23	7	1	5	3	24	110	24	N
Fvb1:20157555-20157948	IR_852	Fvb1	20157555	20157948	394	812	346	0.671	.	CCUAGCGGAUUCUAGCAGCUUCCC	52	42	29	119	59	93	470	24	N
Fvb1:20170727-20171425	IR_853	Fvb1	20170727	20171425	699	44	35	0.5	.	AUUAAAGAGAGUCAACACCAACGG	5	3	0	5	0	1	35	24	N
Fvb1:20231008-20231431	IR_854	Fvb1	20231008	20231431	424	42	13	0.286	.	AUUCGUCGGCUAAAGUAGUUUAGC	26	0	1	0	0	1	40	24	N
Fvb1:20236583-20236737	IR_855	Fvb1	20236583	20236737	155	11	7	0.273	.	CGACACACGUAUAAGUCGUCGGCU	3	0	0	0	1	0	10	24	N
Fvb1:20396660-20397357	IR_856	Fvb1	20396660	20397357	698	103	66	0.369	.	GGGACAGAAAGGGAUGAACUCAUC	18	4	0	8	2	8	81	24	N
Fvb1:20408043-20408275	IR_857	Fvb1	20408043	20408275	233	370	145	0.527	.	ACAAGGACUGAACAAUUGUUGACU	32	7	8	11	5	39	300	24	N
Fvb1:20416824-20417482	IR_858	Fvb1	20416824	20417482	659	93	65	0.613	.	ACGUCUCAUGGCGUGAUCUUGGUA	5	2	1	4	3	4	79	24	N
Fvb1:20456193-20456621	IR_859	Fvb1	20456193	20456621	429	4162	178	0.011	-	ACCCGAGCGGACACUAGAGGCAUC	3536	19	14	73	135	163	3758	24	N
Fvb1:20456627-20456993	IR_860	Fvb1	20456627	20456993	367	595	253	0.461	.	CGUCGUCGGCGCCUGAGGGUGGAG	94	46	27	54	22	62	384	24	N
Fvb1:20532674-20533086	IR_861	Fvb1	20532674	20533086	413	730	287	0.647	.	UUCCCGGACGACAGCAUAGGCUUU	76	46	5	120	65	78	416	24	N
Fvb1:20576973-20577360	IR_862	Fvb1	20576973	20577360	388	27	17	0.37	.	AUGGGGACUGAAAUGAUGUUAACC	5	0	0	0	2	1	24	24	N
Fvb1:20594087-20594517	IR_864	Fvb1	20594087	20594517	431	15	5	0.667	.	AUUCGUCGGCUAAAGUGUUUUAGC	9	0	2	0	0	0	13	24	N
Fvb1:20621255-20621670	IR_865	Fvb1	20621255	20621670	416	277	128	0.762	.	GUUUUAGACAUUGUACGGUUGAGA	57	8	3	18	13	53	182	24	N
Fvb1:20718794-20719205	IR_866	Fvb1	20718794	20719205	412	620	60	0.955	+	ACUAAAUUGAACUUUUGAAAGCCU	361	6	3	23	4	75	509	24	N
Fvb1:20759714-20759949	IR_867	Fvb1	20759714	20759949	236	41	27	0.585	.	AAGGACUAGACAGAUGUUGACUUC	6	0	0	4	0	8	29	24	N
Fvb1:20763212-20763606	IR_868	Fvb1	20763212	20763606	395	98	45	0.827	+	AGAGAAAGUCCGGACACACACGUA	22	4	1	3	3	16	71	24	N
Fvb1:20817209-20817906	IR_869	Fvb1	20817209	20817906	698	288	150	0.771	.	UCCGCUGUUUGGAUUCUUAUCCCG	47	11	8	8	11	46	204	24	N
Fvb1:20830322-20830698	IR_870	Fvb1	20830322	20830698	377	95	57	0.4	.	AUUAGCUGAAAUUUUGUAAAGAUG	15	0	0	2	0	11	82	24	N
Fvb1:20879233-20879559	IR_871	Fvb1	20879233	20879559	327	614	266	0.822	+	AGUGAUCGGGGAUGCCACUGGUGU	66	63	15	72	59	84	321	24	N
Fvb1:20879617-20879971	IR_872	Fvb1	20879617	20879971	355	451	213	0.599	.	AUUCAGCGGAUUCGCCGGGGA	16	45	13	79	49	32	233	24	N
Fvb1:20891043-20891594	IR_874	Fvb1	20891043	20891594	552	1534	379	0.395	.	UGACUGACAAUAUGGUACCCG	77	17	26	123	22	156	1190	24	N
Fvb1:20907585-20908060	IR_875	Fvb1	20907585	20908060	476	696	245	0.49	.	AUAAGUUUGGUCCAAUUUUUGAAU	80	32	16	41	35	99	473	24	N
Fvb1:20932391-20932864	IR_876	Fvb1	20932391	20932864	474	65	32	0.723	.	AGGAAUGAUCUACACACUGUGUUU	17	0	0	4	4	8	49	24	N
Fvb1:20939217-20939585	IR_877	Fvb1	20939217	20939585	369	96	47	0.292	.	UUUGCUAAGAUUUCGUCCAAUU	9	6	1	20	21	9	39	24	N
Fvb1:20970948-20971348	IR_878	Fvb1	20970948	20971348	401	441	248	0.469	.	AUAUACGGAAACUGGAAUUAUCUC	27	41	2	51	21	51	275	24	N
Fvb1:20973015-20973440	IR_879	Fvb1	20973015	20973440	426	954	349	0.476	.	CUCCAUCGUUCAGUGUCUAGAAUA	71	29	10	22	26	150	717	24	N
Fvb1:20974462-20975159	IR_880	Fvb1	20974462	20975159	698	1057	367	0.428	.	AAGAAAAAACUGCAGCAACUUUGC	101	63	16	63	26	169	720	24	N
Fvb1:20992838-20993310	IR_881	Fvb1	20992838	20993310	473	23	19	0.304	.	UCAGUCCGUCCAUUUGUUUUUCGA	3	0	0	0	2	4	17	24	N
Fvb1:21001494-21001892	IR_882	Fvb1	21001494	21001892	399	11	9	0.727	.	AAUGCGAACAUCCACACCUGAGAA	2	0	0	1	1	1	8	24	N
Fvb1:21001939-21002176	IR_883	Fvb1	21001939	21002176	238	18	13	0.333	.	AUUCAGCGGACUUGCCAGGGGGGG	3	1	0	2	0	2	13	24	N
Fvb1:21002196-21002717	IR_884	Fvb1	21002196	21002717	522	215	72	0.865	+	AGACGGCCUGUAUAUAUAUAUAUA	60	6	1	19	11	15	163	24	N
Fvb1:21002718-21002977	IR_885	Fvb1	21002718	21002977	260	42	28	0.405	.	CGUGAGACGGCGGAGAACGGACA	5	5	2	9	2	6	18	24	N
Fvb1:21007396-21007789	IR_886	Fvb1	21007396	21007789	394	155	69	0.484	.	AGAGACAGACUGUAUAUAUAUAUA	32	8	0	6	2	21	118	24	N
Fvb1:21038503-21039007	IR_887	Fvb1	21038503	21039007	505	190	60	0.184	-	AAAAACGGAUGUUUGGACACGGCU	30	3	1	2	0	29	155	24	N
Fvb1:21086833-21087229	IR_888	Fvb1	21086833	21087229	397	312	56	0.804	+	AAAACUGGAAUUCGGCGGACUCGC	170	10	0	3	2	18	279	24	N
Fvb1:21087234-21087931	IR_889	Fvb1	21087234	21087931	698	261	100	0.736	.	AGACGGCCUGUAUAUGUAUAUAUA	24	18	0	24	16	37	166	24	N
Fvb1:21087936-21088346	IR_890	Fvb1	21087936	21088346	411	149	53	0.772	.	GGGACGCUGCUAGAGUCUUCUAGG	36	3	1	5	6	6	128	24	N
Fvb1:21104398-21104755	IR_891	Fvb1	21104398	21104755	358	54	41	0.537	.	GUUGGCGCCGGAGGGUGGAGAAC	6	1	1	3	5	13	31	24	N
Fvb1:21129794-21130207	IR_892	Fvb1	21129794	21130207	414	103	33	0.738	.	AGUGAGGACCCUUAAGUUGAGGAC	28	1	2	2	0	6	92	24	N
Fvb1:21136162-21136685	IR_893	Fvb1	21136162	21136685	524	359	131	0.513	.	AUAUGACGUCACCAAGCUGUUGGA	35	4	3	5	14	55	278	24	N
Fvb1:21142603-21142960	IR_894	Fvb1	21142603	21142960	358	145	69	0.717	.	ACCGUUAAGUUUGUAGAACCAAAU	31	9	5	2	2	16	111	24	N
Fvb1:21168875-21169271	IR_895	Fvb1	21168875	21169271	397	503	209	0.672	.	AGACGGACUGUAUAUAUAUAUAUA	73	23	12	30	34	58	346	24	N
Fvb1:21169310-21169649	IR_896	Fvb1	21169310	21169649	340	33	18	0.515	.	CAUAUCUAGAUCAUCUUGUGUAGA	9	1	0	1	2	7	22	24	N
Fvb1:21188042-21188470	IR_897	Fvb1	21188042	21188470	429	57	34	0.333	.	AUAUAUGAGGGAUCAAGCAUUAGA	7	0	0	2	3	7	45	24	N
Fvb1:21188517-21188951	IR_898	Fvb1	21188517	21188951	435	21	17	0.429	.	AUUCUUACGGUGCGGAUUUCCACU	3	0	1	0	2	4	14	24	N
Fvb1:21188952-21189371	IR_899	Fvb1	21188952	21189371	420	14	8	0.857	+	AUCCAAAUUGAUGAUCGUUAAGGU	6	0	1	1	0	0	12	24	N
Fvb1:21198288-21198442	IR_900	Fvb1	21198288	21198442	155	2	2	1	+	AUAAGUCGUCGGCUAUAGUCCGGA	1	0	0	0	0	0	2	24	N
Fvb1:21203117-21203429	IR_901	Fvb1	21203117	21203429	313	174	17	0.925	+	AUUCGUCGGCUAAAGUGUUUUAGC	152	0	2	2	0	1	169	24	N
Fvb1:21228391-21228687	IR_902	Fvb1	21228391	21228687	297	66	17	0.439	.	AAACAAGAGCUCGGAGGGUAAUCU	24	0	1	0	0	0	65	24	N
Fvb1:21236420-21236955	IR_903	Fvb1	21236420	21236955	536	245	86	0.29	.	AAGGACUAACAUGAUGAUCGACCU	56	2	3	8	2	18	212	24	N
Fvb1:21265564-21266219	IR_904	Fvb1	21265564	21266219	656	117	92	0.427	.	AAAUUUGAGCUUUCGAUGAGAACU	5	6	2	6	2	16	85	24	N
[truncated: 8,166 more rows]
