# Supplementary material for: Naturally occurring variation in gene-associated transposable elements impacts gene expression and phenotypic diversity in woodland strawberry
Source: Research Square preprint supplement (doi:10.21203/rs.3.rs-6266511/v1), 2025-04-22
Supplement: Supplementary file 5 [file 95f3a4c042690dc0b5d71d17.xlsx]

## Sheet: IRs & Genes - Leaf vs Immature
IR_ID	log2FoldChange	padj	Coords	Gene_Chr	Gene_Start	Gene_End	Gene_ID	Gene_Strand	Distance_IR_from_Gene	Location_IR_from_Gene	log2FC_gene_LeafvsWhite	padj_gene_LeafvsWhite	BLAST	InterPro	GO Term	GO Accession
IR_2594	-10.3939	0.00019865	Fvb3:7172225-7172634	Fvb3	7172985	7175273	FvH4_3g12100	+	352	Upstream TSS	1.72379	0.425032	AT1G01340.2 | cyclic nucleotide gated channel 10 | Chr1:132414-135216 REVERSE LENGTH=711 | 201606; PREDICTED: probable cyclic nucleotide-gated ion channel 3 [Fragaria vesca subsp. vesca]; sp|Q9LNJ0|CNG10_ARATH Probable cyclic nucleotide-gated ion channel 10 OS=Arabidopsis thaliana OX=3702 GN=CNGC10 PE=2 SV=2; tr|A0A2P6SDL6|A0A2P6SDL6_ROSCH Putative potassium channel, voltage-dependent, ERG OS=Ros…	cAMP-binding domain-like; CAP_ED; cNMP-bd_dom; cNMP-bd-like; CNMP_BINDING_3; CYCLIC NUCLEOTIDE-GATED ION CHANNEL 1; FAMILY NOT NAMED; FvH4_3g12100.t1_v4.0.a2; RmlC-like_jellyroll	NA	NA
IR_5949	-9.44917	0.0084172	Fvb5:12421298-12421701	Fvb5	12424695	12429833	FvH4_5g20841	-	2995	Downstream TTS	NA	NA	tr|M5XHY2|M5XHY2_PRUPE Uncharacterized protein (Fragment) OS=Prunus persica OX=3760 GN=PRUPE_ppa020847mg PE=4 SV=1	disorder_prediction; FvH4_5g20841.t1_v4.0.a2	NA	NA
IR_8512	-9.14663	0.00287344	Fvb6:38260057-38260563	Fvb6	38254705	38257372	FvH4_6g51620	-	2685	Upstream TSS	0.441966	0.745854	AT3G01580.1 | Tetratricopeptide repeat (TPR)-like superfamily protein | Chr3:223529-225511 REVERSE LENGTH=660 | 201606; putative pentatricopeptide repeat-containing protein At3g01580 [Rosa chinensis]; sp|Q9SS97|PP205_ARATH Putative pentatricopeptide repeat-containing protein At3g01580 OS=Arabidopsis thaliana OX=3702 GN=PCMP-E87 PE=3 SV=2; tr|A0A314Z3A4|A0A314Z3A4_PRUYE Putative pentatricopeptide …	FAMILY NOT NAMED; FvH4_6g51620.t1_v4.0.a2; Pentatricopeptide_repeat; PPR; PPR_2; protein binding; TIGR00756; TPR-like; TPR-like_helical_dom_sf	protein binding	GO:0005515
IR_8512	-9.14663	0.00287344	Fvb6:38260057-38260563	Fvb6	38260749	38263595	FvH4_6g51650	+	187	Upstream TSS	0.0357127	0.971107	AT5G50180.1 | Protein kinase superfamily protein | Chr5:20431116-20432883 FORWARD LENGTH=346 | 201606; PREDICTED: serine/threonine-protein kinase HT1-like [Fragaria vesca subsp. vesca]; sp|Q9ZQ31|STY13_ARATH Serine/threonine-protein kinase STY13 OS=Arabidopsis thaliana OX=3702 GN=STY13 PE=1 SV=2; tr|A0A2P6S5T6|A0A2P6S5T6_ROSCH Putative dual-specificity kinase TKL-Pl-4 family OS=Rosa chinensis OX=…	ATP binding; disorder_prediction; FvH4_6g51650.t1_v4.0.a2; ILK; Kinase-like_dom_sf; Pkinase_Tyr; protein kinase activity; PROTEIN_KINASE_ATP; Protein_kinase_ATP_BS; PROTEIN_KINASE_DOM; Protein kinase-like (PK-like); PROTEIN_KINASE_ST; protein phosphorylation; Prot_kinase_dom; SERINE-THREONINE PROTEIN KINASE; Ser/Thr_kinase_AS; Ser-Thr/Tyr_kinase_cat_dom; ; STKc_MAP3K-like; TYRKINASE	ATP binding; protein kinase activity; protein phosphorylation	GO:0004672; GO:0005524; GO:0006468
IR_2265	-9.00191	0.0128171	Fvb2:26566162-26566628	Fvb2	26569167	26571397	FvH4_2g36250	+	2540	Upstream TSS	NA	NA	AT5G25610.1 | BURP domain-containing protein | Chr5:8914498-8916684 REVERSE LENGTH=392 | 201606; PREDICTED: dehydration-responsive protein RD22 [Fragaria vesca subsp. vesca]; sp|Q08298|RD22_ARATH BURP domain protein RD22 OS=Arabidopsis thaliana OX=3702 GN=RD22 PE=2 SV=1; tr|U5FFE5|U5FFE5_POPTR Uncharacterized protein OS=Populus trichocarpa OX=3694 GN=POPTR_018G036700v3 PE=4 SV=1	BURP; BURP_dom; BURP DOMAIN PROTEIN RD22; disorder_prediction; FAMILY NOT NAMED; FvH4_2g36250.t1_v4.0.a2	NA	NA
IR_2265	-9.00191	0.0128171	Fvb2:26566162-26566628	Fvb2	26568828	26584913	FvH4_2g36240	-	2201	Downstream TTS	3.15251	0.00026776	AT4G32700.2 | MUS308 and mammalian DNA polymerase-like protein | Chr4:15767440-15779185 FORWARD LENGTH=2154 | 201606; PREDICTED: helicase and polymerase-containing protein TEBICHI [Fragaria vesca subsp. vesca]; sp|Q588V7|TEB_ARATH Helicase and polymerase-containing protein TEBICHI OS=Arabidopsis thaliana OX=3702 GN=TEB PE=2 SV=1; tr|A0A2P6PZZ9|A0A2P6PZZ9_ROSCH Putative DNA-directed DNA polymerase…	ATP binding; DEAD; DEAD/DEAH_box_helicase_dom; DEXDc; disorder_prediction; DNA binding; DNA-dependent DNA replication; DNA-dir_DNA_pol_A_palm_dom; DNA-directed DNA polymerase activity; DNA_pol_A; DNA_pol_A_theta; DNAPOLI; DNA_polymerase_A; DNA POLYMERASE I; DNA POLYMERASE THETA; DNA replication; DNA/RNA polymerases; FvH4_2g36240.t1_v4.0.a2; FvH4_2g36240.t2_v4.0.a2; Helicase_ATP-bd; HELICASE_ATP_B…	ATP binding; DNA binding; DNA-directed DNA polymerase activity; DNA replication; DNA-templated DNA replication; nucleic acid binding	GO:0003676; GO:0003677; GO:0003887; GO:0005524; GO:0006260; GO:0006261
IR_7754	-8.84078	0.00710597	Fvb6:21662450-21663151	Fvb6	21656941	21659479	FvH4_6g28113	-	2971	Upstream TSS	NA	NA	PREDICTED: uncharacterized protein LOC105352232 [Fragaria vesca subsp. vesca]; tr|M5VQY4|M5VQY4_PRUPE Uncharacterized protein OS=Prunus persica OX=3760 GN=PRUPE_ppa018564mg PE=4 SV=1	disorder_prediction; FAMILY NOT NAMED; FvH4_6g28113.t1_v4.0.a2;	NA	NA
IR_7754	-8.84078	0.00710597	Fvb6:21662450-21663151	Fvb6	21665144	21666441	FvH4_6g28140	+	1994	Upstream TSS	-1.63194	0.436883	AT5G22250.1 | Polynucleotidyl transferase%2C ribonuclease H-like superfamily protein | Chr5:7365605-7366441 REVERSE LENGTH=278 | 201606; PREDICTED: probable CCR4-associated factor 1 homolog 11 [Fragaria vesca subsp. vesca]; sp|Q9FMS6|CAF1K_ARATH Probable CCR4-associated factor 1 homolog 11 OS=Arabidopsis thaliana OX=3702 GN=CAF1-11 PE=2 SV=1; tr|A0A2P6RV85|A0A2P6RV85_ROSCH Putative poly(A)-specif…	CAF1; CCR4-ASSOCIATED FACTOR 1 HOMOLOG 9-RELATED; CCR4-NOT complex; CCR4-NOT TRANSCRIPTION COMPLEX SUBUNIT; CNOT7/CNOT8/Pop2; Deadenylation of mRNA; FvH4_6g28140.t1_v4.0.a2; nucleic acid binding; poly(A)-specific ribonuclease activity; Ribonuclease H-like; RNase_CAF1; RNaseH-like_sf; RNaseH_sf; TP53 regulates transcription of additional cell cycle genes whose exact role in the p53 pathway remain …	CCR4-NOT complex; nucleic acid binding; poly(A)-specific ribonuclease activity	GO:0003676; GO:0004535; GO:0030014
IR_7754	-8.84078	0.00710597	Fvb6:21662450-21663151	Fvb6	21661502	21661883	FvH4_6g28114	+	567	Downstream TTS	NA	NA	tr|A0A2P6QX62|A0A2P6QX62_ROSCH Putative ribonuclease H-like domain, reverse transcriptase zinc-binding domain-containing protein OS=Rosa chinensis OX=74649 GN=RchiOBHm_Chr4g0417671 PE=4 SV=1; uncharacterized protein LOC112197206 [Rosa chinensis]	FvH4_6g28114.t1_v4.0.a2; nucleic acid binding; RNA-DNA hybrid ribonuclease activity; RNaseH_domain; RNaseH_sf; RVT_3	nucleic acid binding; RNA-DNA hybrid ribonuclease activity	GO:0003676; GO:0004523
IR_6882	-8.66002	0.0116686	Fvb6:4743094-4743300	Fvb6	4738846	4742932	FvH4_6g07960	+	162	Downstream TTS	NA	NA	AT1G11340.1 | G-type lectin S-receptor-like Serine/Threonine-kinase | Chr1:3814116-3817216 REVERSE LENGTH=833 | 201606; G-type lectin S-receptor-like serine/threonine-protein kinase At1g11410 isoform X1 [Rosa chinensis]; sp|Q9ZT07|RKS1_ARATH G-type lectin S-receptor-like serine/threonine-protein kinase RKS1 OS=Arabidopsis thaliana OX=3702 GN=RKS1 PE=3 SV=3; tr|A0A2P6Q341|A0A2P6Q341_ROSCH Uncharac…	alpha-D-mannose-specific plant lectins; ATP binding; B_lectin; BULB_LECTIN; Bulb-type_lectin_dom; Bulb-type_lectin_dom_sf; FAMILY NOT NAMED; FvH4_6g07960.t1_v4.0.a2; Human cytomegalovirus infection; Human immunodeficiency virus 1 infection; Human papillomavirus infection; Kinase-like_dom_sf; mTOR signaling pathway; PAN; PAN_2; Pan_app; PAN_AP_plant; PI3K-Akt signaling pathway; Pkinase_Tyr; protei…	ATP binding; protein kinase activity; protein phosphorylation; protein serine/threonine kinase activity; recognition of pollen	GO:0004672; GO:0004674; GO:0005524; GO:0006468; GO:0048544
IR_7537	-8.63093	0.0151064	Fvb6:18276177-18276611	Fvb6	18274723	18275141	FvH4_6g24240	+	1036	Downstream TTS	NA	NA	NA	FvH4_6g24240.t1_v4.0.a2	NA	NA
IR_7234	-8.44409	0.0254231	Fvb6:12505046-12505559	Fvb6	12507429	12507765	FvH4_6g18912	-	1871	Downstream TTS	NA	NA	NA	FvH4_6g18912.t1_v4.0.a2	NA	NA
IR_4731	-8.39889	0.0142724	Fvb4:16936631-16937328	Fvb4	16939802	16948800	FvH4_4g13340	+	2475	Upstream TSS	0.677808	0.294738	AT5G48610.5 | myb-like protein X | Chr5:19712614-19715543 FORWARD LENGTH=484 | 201606; PREDICTED: glutamic acid-rich protein-like [Fragaria vesca subsp. vesca] &gt;gi|764573024|ref|XP_011462820.1| PREDICTED: glutamic acid-rich protein-like [Fragaria vesca subsp. vesca]; tr|A0A2P6QWA7|A0A2P6QWA7_ROSCH Uncharacterized protein OS=Rosa chinensis OX=74649 GN=RchiOBHm_Chr4g0413691 PE=4 SV=1	Coil; disorder_prediction; FAMILY NOT NAMED; FvH4_4g13340.t1_v4.0.a2; FvH4_4g13340.t2_v4.0.a2; MYB-LIKE PROTEIN X	NA	NA
IR_9381	-8.38336	0.0219297	Fvb7:21623013-21623334	Fvb7	21615738	21621801	FvH4_7g29360	-	1212	Upstream TSS	1.14138	0.0552439	AT4G25540.1 | homolog of DNA mismatch repair protein MSH3 | Chr4:13042700-13048115 REVERSE LENGTH=1081 | 201606; PREDICTED: DNA mismatch repair protein MSH3 [Fragaria vesca subsp. vesca]; sp|O65607|MSH3_ARATH DNA mismatch repair protein MSH3 OS=Arabidopsis thaliana OX=3702 GN=MSH3 PE=1 SV=2; tr|A0A2P6SN39|A0A2P6SN39_ROSCH Putative DNA mismatch repair protein MutS OS=Rosa chinensis OX=74649 GN=Rch…	ABC_MSH3_euk; ATP binding; Coil; Defective Mismatch Repair Associated With MSH2; disorder_prediction; DNA_MISMATCH_REPAIR_2; DNA_mismatch_repair_MutS_C; DNA_mismatch_repair_MutS_core; DNA_mismatch_repair_MutS-lik_N; DNA_mismatch_repair_MutS/MSH; DNA_mismatch_repair_MutS_N; DNA_mismatch_repair_MutS_sf; DNA MISMATCH REPAIR PROTEIN MSH3; DNA MISMATCH REPAIR PROTEIN MUTS FAMILY MEMBER; DNA_mmatch_rep…	ATP binding; mismatched DNA binding; mismatch repair	GO:0005524; GO:0006298; GO:0030983
IR_9381	-8.38336	0.0219297	Fvb7:21623013-21623334	Fvb7	21625074	21627561	FvH4_7g29361	+	1741	Upstream TSS	NA	NA	NA	disorder_prediction; FvH4_7g29361.t1_v4.0.a2	NA	NA
IR_7085	-8.33389	0.0211864	Fvb6:9018229-9018477	Fvb6	9021144	9023349	FvH4_6g14650	+	2668	Upstream TSS	0.637477	0.541993	AT3G09520.1 | exocyst subunit exo70 family protein H4 | Chr3:2923743-2925629 FORWARD LENGTH=628 | 201606; PREDICTED: exocyst complex component EXO70A1-like [Fragaria vesca subsp. vesca]; sp|Q8VY27|E70H1_ARATH Exocyst complex component EXO70H1 OS=Arabidopsis thaliana OX=3702 GN=EXO70H1 PE=1 SV=1; tr|A0A2P6RAD4|A0A2P6RAD4_ROSCH Exocyst subunit Exo70 family protein OS=Rosa chinensis OX=74649 GN=Rchi…	Cullin repeat-like; Cullin_repeat-like_dom_sf; disorder_prediction; Exo70; exocyst; EXOCYST COMPLEX PROTEIN EXO70; EXOCYST SUBUNIT EXO70 FAMILY PROTEIN H4; exocytosis; FvH4_6g14650.t1_v4.0.a2; Insulin processing; Translocation of SLC2A4 (GLUT4) to the plasma membrane; VxPx cargo-targeting to cilium	exocyst; exocytosis	GO:0000145; GO:0006887
IR_6885	-8.28788	0.0158866	Fvb6:4768901-4769262	Fvb6	4765710	4767967	FvH4_6g07990	-	934	Upstream TSS	NA	NA	AT4G18910.1 | NOD26-like intrinsic protein 1%3B2 | Chr4:10366211-10368179 FORWARD LENGTH=294 | 201606; PREDICTED: nodulin-26-like [Fragaria vesca subsp. vesca]; sp|Q8LFP7|NIP12_ARATH Aquaporin NIP1-2 OS=Arabidopsis thaliana OX=3702 GN=NIP1-2 PE=2 SV=2; tr|A0A0H3UY47|A0A0H3UY47_FRAAN Aquaporin NOD26-like protein OS=Fragaria ananassa OX=3747 GN=NIP1:1 PE=2 SV=1	Aquaporin-like; Aquaporin_transptr; channel activity; FAMILY NOT NAMED; FvH4_6g07990.t1_v4.0.a2; membrane; MINTRINSICP; MIP; MIP_CS; Passive transport by Aquaporins; ; TIGR00861; transmembrane transport	channel activity; membrane; transmembrane transport	GO:0015267; GO:0016020; GO:0055085
IR_8230	-8.26299	0.0266363	Fvb6:30878978-30879278	Fvb6	30876912	30878660	FvH4_6g39030	-	318	Upstream TSS	5.1878	0.022058	AT1G16260.3 | Wall-associated kinase family protein | Chr1:5559708-5562018 REVERSE LENGTH=711 | 201606; PREDICTED: wall-associated receptor kinase-like 8 [Fragaria vesca subsp. vesca]; sp|Q9SA25|WAKLG_ARATH Wall-associated receptor kinase-like 8 OS=Arabidopsis thaliana OX=3702 GN=WAKL8 PE=2 SV=1; tr|A0A2P6S0H5|A0A2P6S0H5_ROSCH Putative EGF-like calcium-binding, wall-associated receptor kinase, ga…	FAMILY NOT NAMED; FvH4_6g39030.t1_v4.0.a2; GUB_WAK_bind; polysaccharide binding; WAK_GUB	polysaccharide binding	GO:0030247
IR_6886	-8.18062	0.0241188	Fvb6:4769263-4769684	Fvb6	4771036	4774233	FvH4_6g08000	+	1353	Upstream TSS	-0.493682	0.567735	AT4G18910.1 | NOD26-like intrinsic protein 1%3B2 | Chr4:10366211-10368179 FORWARD LENGTH=294 | 201606; PREDICTED: aquaporin NIP1-1-like [Fragaria vesca subsp. vesca] &gt;gi|764597635|ref|XP_011466195.1| PREDICTED: aquaporin NIP1-1-like [Fragaria vesca subsp. vesca]; sp|Q8LFP7|NIP12_ARATH Aquaporin NIP1-2 OS=Arabidopsis thaliana OX=3702 GN=NIP1-2 PE=2 SV=2; tr|E7BLL1|E7BLL1_9ROSA Nodulin 26-like i…	Aquaporin-like; Aquaporin_transptr; channel activity; disorder_prediction; FAMILY NOT NAMED; FvH4_6g08000.t1_v4.0.a2; membrane; MINTRINSICP; MIP; MIP_CS; Passive transport by Aquaporins; ; TIGR00861; transmembrane transport	channel activity; membrane; transmembrane transport	GO:0015267; GO:0016020; GO:0055085
IR_2142	-7.99276	0.035513	Fvb2:23167227-23167671	Fvb2	23163467	23165976	FvH4_2g29878	-	1251	Upstream TSS	NA	NA	AT4G21410.2 | cysteine-rich RLK (RECEPTOR-like protein kinase) 29 | Chr4:11403093-11405025 REVERSE LENGTH=524 | 201606; cysteine-rich receptor-like protein kinase 26 isoform X1 [Rosa chinensis]; sp|Q8S9L6|CRK29_ARATH Cysteine-rich receptor-like protein kinase 29 OS=Arabidopsis thaliana OX=3702 GN=CRK29 PE=2 SV=1; tr|A0A2P6S6R8|A0A2P6S6R8_ROSCH Uncharacterized protein OS=Rosa chinensis OX=74649 GN…	ATP binding; CYSTEINE-RICH RECEPTOR-LIKE PROTEIN KINASE 34-RELATED; CYSTEINE-RICH REPEAT SECRETORY PROTEIN; FvH4_2g29878.t1_v4.0.a2; GNK2; GNK2_sf; Kinase-like_dom_sf; Pkinase_Tyr; protein kinase activity; PROTEIN_KINASE_ATP; Protein_kinase_ATP_BS; PROTEIN_KINASE_DOM; Protein kinase-like (PK-like); protein phosphorylation; Prot_kinase_dom; Ser-Thr/Tyr_kinase_cat_dom; Stress-antifung	ATP binding; protein kinase activity; protein phosphorylation	GO:0004672; GO:0005524; GO:0006468
IR_718	-7.5411	1.81636e-07	Fvb1:17511728-17512178	Fvb1	17513529	17518240	FvH4_1g25670	+	1352	Upstream TSS	2.07322	4.62792e-08	AT4G39630.1 | translation initiation factor | Chr4:18397749-18399263 REVERSE LENGTH=233 | 201606; PREDICTED: uncharacterized protein LOC101313156 [Fragaria vesca subsp. vesca] &gt;gi|764521119|ref|XP_011469788.1| PREDICTED: uncharacterized protein LOC101313156 [Fragaria vesca subsp. vesca] &gt;gi|764521124|ref|XP_011469792.1| PREDICTED: uncharacterized protein LOC101313156 [Fragaria vesca subsp. …	Coil; disorder_prediction; FAMILY NOT NAMED; FvH4_1g25670.t1_v4.0.a2	NA	NA
IR_718	-7.5411	1.81636e-07	Fvb1:17511728-17512178	Fvb1	17506389	17511009	FvH4_1g25660	+	719	Downstream TTS	0.702957	0.348889	AT1G29900.1 | carbamoyl phosphate synthetase B | Chr1:10468164-10471976 FORWARD LENGTH=1187 | 201606; PREDICTED: carbamoyl-phosphate synthase large chain, chloroplastic [Fragaria vesca subsp. vesca]; sp|Q42601|CARB_ARATH Carbamoyl-phosphate synthase large chain, chloroplastic OS=Arabidopsis thaliana OX=3702 GN=CARB PE=1 SV=1; tr|A0A2P6RT81|A0A2P6RT81_ROSCH Putative carbamoyl-phosphate synthase (G…	Alanine, aspartate and glutamate metabolism; ATP binding; ATP-grasp; ATP_GRASP; CAD PROTEIN; Carbamoyl phosphate synthetase, large subunit connection domain; CarbamoylP_synth_lsu; CarbamoylP_synth_lsu_oligo; CarbamoylP_synth_lsu_oligo_sf; CARBAMOYLTRANSFERASE FAMILY MEMBER; CbamoylP_synth_lsu_CPSase_dom; CbamoylP_synth_lsu-like_ATP-bd; CPSASE; CPSASE_1; CPSASE_2; CPSase_L_chain_A; CPSase_L_chain_…	ATP binding; metal ion binding; obsolete nitrogen compound metabolic process	GO:0005524; GO:0006807; GO:0046872
IR_8747	-7.52719	1.28561e-13	Fvb7:4397507-4397957	Fvb7	4398984	4399398	FvH4_7g03860	+	1028	Upstream TSS	NA	NA	NA	FvH4_7g03860.t1_v4.0.a2	NA	NA
IR_2168	-7.50548	9.93138e-10	Fvb2:23492462-23492989	Fvb2	23493284	23493765	FvH4_2g30341	+	296	Upstream TSS	NA	NA	NA	FvH4_2g30341.t1_v4.0.a2	NA	NA
IR_2168	-7.50548	9.93138e-10	Fvb2:23492462-23492989	Fvb2	23494279	23496760	FvH4_2g30342	+	1291	Upstream TSS	NA	NA	tr|A0A1R3GNW3|A0A1R3GNW3_COCAP Reverse transcriptase OS=Corchorus capsularis OX=210143 GN=CCACVL1_24647 PE=4 SV=1; uncharacterized protein LOC110432059 [Sorghum bicolor]	Coil; disorder_prediction; DNase I-like; Endo/exonu/phosph_ase_sf; FAMILY NOT NAMED; FvH4_2g30342.t1_v4.0.a2;	NA	NA
IR_2168	-7.50548	9.93138e-10	Fvb2:23492462-23492989	Fvb2	23490015	23491596	FvH4_2g30340	+	866	Downstream TTS	NA	NA	PREDICTED: uncharacterized protein LOC105352280 [Fragaria vesca subsp. vesca]	FvH4_2g30340.t1_v4.0.a2	NA	NA
IR_3221	-7.04306	0.00907904	Fvb3:19959070-19959453	Fvb3	19953728	19958018	FvH4_3g26810	-	1052	Upstream TSS	-0.740575	0.0769069	AT1G43770.3 | RING/FYVE/PHD zinc finger superfamily protein | Chr1:16548509-16550257 FORWARD LENGTH=431 | 201606; PREDICTED: uncharacterized protein LOC101308361 isoform X3 [Fragaria vesca subsp. vesca]; tr|A0A2P6PSC6|A0A2P6PSC6_ROSCH Putative chromatin regulator PHD family OS=Rosa chinensis OX=74649 GN=RchiOBHm_Chr6g0276691 PE=4 SV=1	FAMILY NOT NAMED; FvH4_3g26810.t1_v4.0.a2; FYVE/PHD zinc finger; ; Znf_FYVE_PHD	NA	NA
IR_3221	-7.04306	0.00907904	Fvb3:19959070-19959453	Fvb3	19960345	19971224	FvH4_3g26820	-	893	Downstream TTS	1.85279	0.000738054	AT3G44050.1 | P-loop containing nucleoside triphosphate hydrolases superfamily protein | Chr3:15818738-15824792 FORWARD LENGTH=1263 | 201606; PREDICTED: phragmoplast orienting kinesin-1 isoform X2 [Fragaria vesca subsp. vesca]; sp|F4J1U4|KN12E_ARATH Kinesin-like protein KIN-12E OS=Arabidopsis thaliana OX=3702 GN=KIN12E PE=3 SV=1; tr|A0A2P6QET2|A0A2P6QET2_ROSCH Putative plus-end-directed kinesin A…	ATP binding; Coil; COPI-dependent Golgi-to-ER retrograde traffic; disorder_prediction; FAMILY NOT NAMED; FvH4_3g26820.t1_v4.0.a2; Kinesin; KINESINHEAVY; KINESIN_MOTOR_1; KINESIN_MOTOR_2; Kinesin_motor_CS; Kinesin_motor_dom; Kinesin_motor_dom_sf; Kinesins; microtubule-based movement; microtubule binding; microtubule motor activity; P-loop containing nucleoside triphosphate hydrolases; P-loop_NTPas…	ATP binding; microtubule-based movement; microtubule binding; microtubule motor activity	GO:0003777; GO:0005524; GO:0007018; GO:0008017
IR_3391	-6.90974	0.0128171	Fvb3:22665945-22666404	Fvb3	22655533	22664479	FvH4_3g29650	-	1466	Upstream TSS	0.874981	0.0368431	AT2G27760.1 | tRNAisopentenyltransferase 2 | Chr2:11824860-11827432 FORWARD LENGTH=466 | 201606; PREDICTED: tRNA dimethylallyltransferase 2 isoform X1 [Fragaria vesca subsp. vesca]; sp|Q9ZUX7|IPT2_ARATH tRNA dimethylallyltransferase 2 OS=Arabidopsis thaliana OX=3702 GN=IPT2 PE=1 SV=2; tr|A0A2P6QGA3|A0A2P6QGA3_ROSCH Putative transferase OS=Rosa chinensis OX=74649 GN=RchiOBHm_Chr5g0055011 PE=3 SV=1	Cis-zeatin biosynthesis; Dimethylallyltransferase; disorder_prediction; FvH4_3g29650.t1_v4.0.a2; IPPT; IPP_trans; IPT; P-loop containing nucleoside triphosphate hydrolases; P-loop_NTPase; TIGR00174; TRNA DIMETHYLALLYLTRANSFERASE; TRNA DIMETHYLALLYLTRANSFERASE 2; tRNA modification in the mitochondrion; tRNA modification in the nucleus and cytosol; tRNA processing; Zeatin biosynthesis	tRNA processing	GO:0008033
IR_3371	-6.43131	0.0192518	Fvb3:22266216-22266914	Fvb3	22263703	22264183	FvH4_3g29142	+	2033	Downstream TTS	NA	NA	tr|A0A2P6Q8F7|A0A2P6Q8F7_ROSCH Uncharacterized protein OS=Rosa chinensis OX=74649 GN=RchiOBHm_Chr5g0024901 PE=4 SV=1	FvH4_3g29142.t1_v4.0.a2	NA	NA
IR_2409	-6.42649	0.0218017	Fvb3:2404939-2405288	Fvb3	2402869	2403688	FvH4_3g04260	-	1251	Upstream TSS	-1.51116	0.416936	AT3G08600.1 | transmembrane protein%2C putative (DUF1191) | Chr3:2612646-2613596 FORWARD LENGTH=316 | 201606; PREDICTED: uncharacterized protein LOC105350286 [Fragaria vesca subsp. vesca]; tr|A0A2P6R881|A0A2P6R881_ROSCH Uncharacterized protein OS=Rosa chinensis OX=74649 GN=RchiOBHm_Chr3g0459851 PE=4 SV=1	disorder_prediction; DUF1191; FAMILY NOT NAMED; FvH4_3g04260.t1_v4.0.a2;	NA	NA
IR_2597	-6.23737	0.0276461	Fvb3:7288642-7289004	Fvb3	7279062	7286689	FvH4_3g12310	+	1953	Downstream TTS	0.301273	0.354703	AT5G08470.1 | peroxisome 1 | Chr5:2735925-2742731 FORWARD LENGTH=1130 | 201606; PREDICTED: peroxisome biogenesis protein 1 isoform X1 [Fragaria vesca subsp. vesca]; sp|Q9FNP1|PEX1_ARATH Peroxisome biogenesis protein 1 OS=Arabidopsis thaliana OX=3702 GN=PEX1 PE=1 SV=2; tr|A0A2P6Q763|A0A2P6Q763_ROSCH Putative vesicle-fusing ATPase OS=Rosa chinensis OX=74649 GN=RchiOBHm_Chr5g0020121 PE=4 SV=1	AAA; AAA-FAMILY ATPASE; AAA_lid_3; ADC-like; Asp_de-COase-like_dom_sf; ATPase_AAA_core; ATPase_AAA_CS; ATPase activity, coupled; ATP binding; Cdc48 domain 2-like; CDC48_domain_2-like_sf; disorder_prediction; FvH4_3g12310.t1_v4.0.a2; peroxisomal membrane; Peroxisomal protein import; peroxisome; PEROXISOME BIOGENESIS FACTOR 1; peroxisome organization; Pex1; PEX-1N; PEX-N_psi_beta-barrel; P-loop con…	ATPase activity, coupled; ATP binding; peroxisomal membrane; peroxisome; peroxisome organization; protein targeting to peroxisome	GO:0005524; GO:0005777; GO:0005778; GO:0006625; GO:0007031; GO:0042623
IR_2173	-6.13547	0.027265	Fvb2:23577400-23577526	Fvb2	23579598	23588572	FvH4_2g30421	-	2073	Downstream TTS	NA	NA	AT2G25730.4 | zinc finger FYVE domain protein | Chr2:10956751-10972729 REVERSE LENGTH=2473 | 201606; PREDICTED: uncharacterized protein LOC101291736 isoform X2 [Fragaria vesca subsp. vesca]; tr|A0A2P6Q1P8|A0A2P6Q1P8_ROSCH Uncharacterized protein OS=Rosa chinensis OX=74649 GN=RchiOBHm_Chr6g0312581 PE=4 SV=1	Coil; disorder_prediction; FAMILY NOT NAMED; FvH4_2g30421.t1_v4.0.a2;	NA	NA
IR_5241	-6.10851	0.0235162	Fvb4:27435481-27435885	Fvb4	27437458	27446024	FvH4_4g25760	+	1574	Upstream TSS	2.97456	4.1627e-07	AT1G72770.4 | HYPERSENSITIVE TO ABA1 | Chr1:27390998-27392851 FORWARD LENGTH=511 | 201606; PREDICTED: uncharacterized protein LOC101301302 isoform X1 [Fragaria vesca subsp. vesca]; sp|Q9CAJ0|P2C16_ARATH Protein phosphatase 2C 16 OS=Arabidopsis thaliana OX=3702 GN=HAB1 PE=1 SV=1; tr|A0A2P6R150|A0A2P6R150_ROSCH Putative leucine-rich repeat domain, L domain-containing protein OS=Rosa chinensis OX=74…	Adenine nucleotide alpha hydrolases-like; catalytic activity; cation binding; Coil; disorder_prediction; FvH4_4g25760.t1_v4.0.a2; L domain-like; LRR_dom_sf; PP2C; PP2C_BS; PP2Cc; PP2C-like; PPM_1; PPM_2; PPM-type_dom_sf; PPM-type_phosphatase_dom; protein dephosphorylation; PROTEIN PHOSPHATASE 2C; PROTEIN PHOSPHATASE 2C 16; protein serine/threonine phosphatase activity; Rossmann-like_a/b/a_fold; S…	catalytic activity; cation binding; protein dephosphorylation; protein serine/threonine phosphatase activity	GO:0003824; GO:0004722; GO:0006470; GO:0043169
IR_5241	-6.10851	0.0235162	Fvb4:27435481-27435885	Fvb4	27431098	27432767	FvH4_4g25740	+	2714	Downstream TTS	0.0138201	0.988769	AT4G12690.2 | DUF868 family protein (DUF868) | Chr4:7480896-7481753 FORWARD LENGTH=285 | 201606; PREDICTED: uncharacterized protein LOC105351839 [Fragaria vesca subsp. vesca]; tr|A0A2P6R161|A0A2P6R161_ROSCH Uncharacterized protein OS=Rosa chinensis OX=74649 GN=RchiOBHm_Chr4g0433181 PE=4 SV=1	disorder_prediction; DUF868; DUF868_pln; FAMILY NOT NAMED; FvH4_4g25740.t1_v4.0.a2;	NA	NA
IR_3741	-6.04336	0.034534	Fvb3:30770119-30770404	Fvb3	30771924	30774857	FvH4_3g35860	+	1521	Upstream TSS	NA	NA	AT5G17680.2 | disease resistance protein (TIR-NBS-LRR class) | Chr5:5822999-5827153 FORWARD LENGTH=1295 | 201606; PREDICTED: TMV resistance protein N-like [Fragaria vesca subsp. vesca]; sp|Q40392|TMVRN_NICGU TMV resistance protein N OS=Nicotiana glutinosa OX=35889 GN=N PE=1 SV=1; tr|A0A2P6QMJ8|A0A2P6QMJ8_ROSCH Putative toll-like receptor, P-loop containing nucleoside triphosphate hydrolase OS=Ros…	carbohydrate binding; FAMILY NOT NAMED; FvH4_3g35860.t1_v4.0.a2; Jacalin; JACALIN_LECTIN; Jacalin-like_lectin_dom; Jacalin-like_lectin_dom_plant; Jacalin-like_lectin_dom_sf; Mannose-binding lectins; protein binding; signal transduction; ; TIR; TIR_dom; Toll/Interleukin receptor TIR domain; Toll_tir_struct_dom_sf	carbohydrate binding; protein binding; signal transduction	GO:0005515; GO:0007165; GO:0030246
IR_2913	-5.91367	0.0236177	Fvb3:13735335-13735769	Fvb3	13736718	13739922	FvH4_3g20680	+	950	Upstream TSS	-0.821504	0.763651	AT4G27420.1 | ABC-2 type transporter family protein | Chr4:13712434-13714797 REVERSE LENGTH=638 | 201606; PREDICTED: ABC transporter G family member 9 [Fragaria vesca subsp. vesca]; sp|Q9SZR9|AB9G_ARATH ABC transporter G family member 9 OS=Arabidopsis thaliana OX=3702 GN=ABCG9 PE=3 SV=2; tr|A0A2P6QB15|A0A2P6QB15_ROSCH Putative pleiotropic drug resistance protein PDR/CDR OS=Rosa chinensis OX=74649…	ABC2_membrane; ABC_2_trans; ABC_tran; ABC_TRANSPORTER_1; ABC_TRANSPORTER_2; ABC_transporter_CS; ABC_transporter-like; ABC transporters in lipid homeostasis; ATPase activity; ATP binding; ATP-BINDING CASSETTE TRANSPORTER; FvH4_3g20680.t1_v4.0.a2; membrane; P-loop containing nucleoside triphosphate hydrolases; P-loop_NTPase;	ATP binding; ATP hydrolysis activity; membrane	GO:0005524; GO:0016020; GO:0016887
IR_4958	-5.79767	0.0499213	Fvb4:21438279-21438603	Fvb4	21441226	21441535	FvH4_4g17490	+	2624	Upstream TSS	10.0136	0.0840494	AT5G18600.1 | Thioredoxin superfamily protein | Chr5:6183466-6183774 REVERSE LENGTH=102 | 201606; PREDICTED: monothiol glutaredoxin-S2 [Fragaria vesca subsp. vesca]; sp|Q8L8Z8|GRXS2_ARATH Monothiol glutaredoxin-S2 OS=Arabidopsis thaliana OX=3702 GN=GRXS2 PE=3 SV=1; tr|A0A2P6QY55|A0A2P6QY55_ROSCH Putative oxidoreductase OS=Rosa chinensis OX=74649 GN=RchiOBHm_Chr4g0421391 PE=4 SV=1	cell redox homeostasis; electron transfer activity; FvH4_4g17490.t1_v4.0.a2; GlrX-like_pln_2; Glutaredoxin; GLUTAREDOXIN; GLUTAREDOXIN_2; Glutaredoxin_subgr; GRX_GRXh_1_2_like; MONOTHIOL GLUTAREDOXIN-S2; protein disulfide oxidoreductase activity; Thioredoxin-like; Thioredoxin-like_sf; TIGR02189	cell redox homeostasis; electron transfer activity; protein-disulfide reductase activity	GO:0009055; GO:0015035; GO:0045454
IR_5608	-5.60947	3.12636e-06	Fvb5:4042325-4042549	Fvb5	4038541	4039554	FvH4_5g06863	-	2771	Upstream TSS	NA	NA	AT3G05850.1 | MuDR family transposase | Chr3:1743537-1745943 REVERSE LENGTH=777 | 201606; PREDICTED: uncharacterized protein LOC105351805 [Fragaria vesca subsp. vesca]; tr|A0A2P6QD74|A0A2P6QD74_ROSCH Putative PB1 domain, transposase, MuDR, plant, Zinc finger, SWIM-type, MULE transposase OS=Rosa chinensis OX=74649 GN=RchiOBHm_Chr5g0042901 PE=4 SV=1	CAD &amp; PB1 domains; FAMILY NOT NAMED; FvH4_5g06863.t1_v4.0.a2; PB1; PB1_dom; protein binding;	protein binding	GO:0005515
IR_4636	-5.58368	1.78978e-05	Fvb4:14490912-14491484	Fvb4	14486622	14488534	FvH4_4g10782	+	2378	Downstream TTS	NA	NA	AT2G34320.1 | Polynucleotidyl transferase%2C ribonuclease H-like superfamily protein | Chr2:14484959-14485837 FORWARD LENGTH=292 | 201606; tr|A0A2P6QCF0|A0A2P6QCF0_ROSCH Putative ribonuclease H-like domain-containing protein OS=Rosa chinensis OX=74649 GN=RchiOBHm_Chr5g0040041 PE=4 SV=1; uncharacterized protein LOC112177537 [Rosa chinensis]	FAMILY NOT NAMED; FvH4_4g10782.t1_v4.0.a2; nucleic acid binding; POLYNUCLEOTIDYL TRANSFERASE, RIBONUCLEASE H-LIKE SUPERFAMILY PROTEIN; Ribonuclease H-like; RNA-DNA hybrid ribonuclease activity; RNaseH_domain; RNase_H_like; RNaseH-like_sf; RNaseH_sf; RVT_3	nucleic acid binding; RNA-DNA hybrid ribonuclease activity	GO:0003676; GO:0004523
IR_2171	-5.5441	1.56409e-16	Fvb2:23572870-23573412	Fvb2	23565710	23570420	FvH4_2g30381	+	2450	Downstream TTS	-4.04095	0.000217341	PREDICTED: MATH and LRR domain-containing protein PFE0570w-like [Fragaria vesca subsp. vesca]	disorder_prediction; FvH4_2g30381.t1_v4.0.a2	NA	NA
IR_4282	-5.41954	0.0022526	Fvb4:3819270-3819670	Fvb4	3810618	3817194	FvH4_4g04470	-	2076	Upstream TSS	0.825747	0.651708	AT3G04380.1 | SET-domain containing protein lysine methyltransferase family protein | Chr3:1161602-1164539 FORWARD LENGTH=492 | 201606; PREDICTED: histone-lysine N-methyltransferase SUVR1-like isoform X1 [Fragaria vesca subsp. vesca] &gt;gi|764568173|ref|XP_011462303.1| PREDICTED: histone-lysine N-methyltransferase SUVR1-like isoform X1 [Fragaria vesca subsp. vesca]; sp|Q8W595|SUVR4_ARATH Histone…	disorder_prediction; FAMILY NOT NAMED; FvH4_4g04470.t1_v4.0.a2; FvH4_4g04470.t4_v4.0.a2; FvH4_4g04470.t7_v4.0.a2; histone lysine methylation; histone-lysine N-methyltransferase activity; Lysine degradation; nucleus; PKMTs methylate histone lysines; Pre-SET; Pre-SET_dom; protein binding; SAM_MT43_3; SET; SET_dom; SET domain; SUVR4/1/2; WIYLD; WIYLD_domain; zinc ion binding	nucleus; obsolete histone lysine methylation; obsolete histone lysine N-methyltransferase activity; protein binding; zinc ion binding	GO:0005515; GO:0005634; GO:0008270; GO:0018024; GO:0034968
IR_8554	-5.40865	0.000469994	Fvb6:39184210-39184903	Fvb6	39181677	39181969	FvH4_6g53440	-	2241	Upstream TSS	NA	NA	NA	FvH4_6g53440.t1_v4.0.a2	NA	NA
IR_8554	-5.40865	0.000469994	Fvb6:39184210-39184903	Fvb6	39185361	39185884	FvH4_6g53450	-	459	Downstream TTS	NA	NA	AT3G27110.4 | Peptidase family M48 family protein | Chr3:9998006-9999554 FORWARD LENGTH=261 | 201606; tr|A0A314YYR2|A0A314YYR2_PRUYE Uncharacterized protein OS=Prunus yedoensis var. nudiflora OX=2094558 GN=Pyn_35413 PE=3 SV=1; uncharacterized protein LOC110764352 [Prunus avium]	FvH4_6g53450.t1_v4.0.a2	NA	NA
IR_1853	-5.36421	3.41886e-09	Fvb2:15671287-15671749	Fvb2	15674037	15674730	FvH4_2g18271	-	2289	Downstream TTS	NA	NA	AT1G20560.2 | acyl activating enzyme 1 | Chr1:7119927-7121363 REVERSE LENGTH=478 | 201606; probable acyl-activating enzyme 1, peroxisomal [Rosa chinensis] &gt;gi|1358150212|gb|PRQ24691.1| putative 4-coumarate--CoA ligase [Rosa chinensis]; sp|F4HUK6|AAE1_ARATH Probable acyl-activating enzyme 1, peroxisomal OS=Arabidopsis thaliana OX=3702 GN=AAE1 PE=2 SV=1; tr|A0A2P6PS04|A0A2P6PS04_ROSCH Putative 4…	Acetyl-CoA synthetase-like; ACYL-ACTIVATING ENZYME 2-RELATED; FAMILY NOT NAMED; FvH4_2g18271.t1_v4.0.a2	NA	NA
IR_7767	-5.34586	0.00309012	Fvb6:21808563-21808955	Fvb6	21802960	21806146	FvH4_6g28330	+	2417	Downstream TTS	NA	NA	AT3G06240.1 | F-box family protein | Chr3:1887336-1888619 FORWARD LENGTH=427 | 201606; PREDICTED: F-box/kelch-repeat protein At3g06240-like [Fragaria vesca subsp. vesca] &gt;gi|764605739|ref|XP_011467007.1| PREDICTED: F-box/kelch-repeat protein At3g06240-like [Fragaria vesca subsp. vesca]; sp|Q8GXC7|FBK50_ARATH F-box/kelch-repeat protein At3g06240 OS=Arabidopsis thaliana OX=3702 GN=At3g06240 PE=2…	FAMILY NOT NAMED; FBA_1; F-box; FBOX; F-box-assoc_dom_typ1; F-box-assoc_interact_dom; F-box_dom; F-box domain; F-box-like_dom_sf; FvH4_6g28330.t1_v4.0.a2; Galactose oxidase, central domain; Gal_Oxase/kelch_b-propeller; protein binding; ; TIGR01640	protein binding	GO:0005515
IR_3992	-5.3428	6.37875e-08	Fvb3:35544474-35544764	Fvb3	35534308	35542101	FvH4_3g42551	+	2373	Downstream TTS	-0.407859	0.91757	NA	FvH4_3g42551.t1_v4.0.a2	NA	NA
IR_6672	-5.32666	0.0105055	Fvb5:27806796-27807201	Fvb5	27808504	27809932	FvH4_5g37770	+	1304	Upstream TSS	NA	NA	AT2G27080.2 | Late embryogenesis abundant (LEA) hydroxyproline-rich glycoprotein family | Chr2:11566383-11567165 FORWARD LENGTH=260 | 201606; PREDICTED: uncharacterized protein LOC101291153 [Fragaria vesca subsp. vesca]; sp|Q9ZVD2|NHL13_ARATH NDR1/HIN1-like protein 13 OS=Arabidopsis thaliana OX=3702 GN=NHL13 PE=2 SV=1; tr|A0A2P6PHR5|A0A2P6PHR5_ROSCH Uncharacterized protein OS=Rosa chinensis OX=74…	disorder_prediction; FAMILY NOT NAMED; FvH4_5g37770.t1_v4.0.a2;	NA	NA
IR_2077	-5.25064	2.71375e-05	Fvb2:21341046-21341743	Fvb2	21344260	21348625	FvH4_2g26610	-	2518	Downstream TTS	-0.873442	0.0634137	AT1G44835.2 | YbaK/aminoacyl-tRNA synthetase-associated domain-containing protein | Chr1:16939909-16942337 FORWARD LENGTH=308 | 201606; PREDICTED: prolyl-tRNA synthetase associated domain-containing protein 1 [Fragaria vesca subsp. vesca]; sp|Q6NRL0|PRXD1_XENLA Prolyl-tRNA synthetase associated domain-containing protein 1 OS=Xenopus laevis OX=8355 GN=prorsd1p PE=2 SV=1; tr|A0A2P6PX73|A0A2P6PX73_R…	Aminoacyl-tRNA biosynthesis; aminoacyl-tRNA editing activity; disorder_prediction; FAMILY NOT NAMED; FvH4_2g26610.t1_v4.0.a2; PrdX_deacylase; ProX/PRXD1; tRNA_edit; YbaK/aa-tRNA-synt-asso_dom_sf; YbaK/aa-tRNA-synth-assoc-dom; YbaK/ProRS associated domain	aminoacyl-tRNA editing activity	GO:0002161
IR_275	-5.18832	9.3799e-12	Fvb1:8373567-8373881	Fvb1	8370251	8372309	FvH4_1g14930	+	1258	Downstream TTS	4.08895	0.267266	AT3G50440.1 | methylesterase | Chr3:18717392-18718396 REVERSE LENGTH=275 | 201606; PREDICTED: probable esterase PIR7A [Fragaria vesca subsp. vesca]; sp|Q6RYA0|SABP2_TOBAC Salicylic acid-binding protein 2 OS=Nicotiana tabacum OX=4097 GN=SABP2 PE=1 SV=1; tr|A0A2P6SB71|A0A2P6SB71_ROSCH Putative 3-oxolaurate decarboxylase OS=Rosa chinensis OX=74649 GN=RchiOBHm_Chr1g0329911 PE=4 SV=1	AB_hydrolase; AB_hydrolase_1; Abhydrolase_6; ALPHA/BETA HYDROLASE FOLD-CONTAINING PROTEIN; alpha/beta-Hydrolases; FvH4_1g14930.t1_v4.0.a2;	NA	NA
IR_5646	-5.17214	0.0109402	Fvb5:4997111-4997463	Fvb5	4994545	4994889	FvH4_5g08700	+	2222	Downstream TTS	NA	NA	AT5G50690.1 | hydroxysteroid dehydrogenase 7 | Chr5:20621330-20622638 FORWARD LENGTH=299 | 201606; PREDICTED: 11-beta-hydroxysteroid dehydrogenase 1B-like [Fragaria vesca subsp. vesca]; sp|Q9LUF2|HSD4B_ARATH 11-beta-hydroxysteroid dehydrogenase-like 4B OS=Arabidopsis thaliana OX=3702 GN=HSD7 PE=2 SV=2; tr|A0A2P6P4S7|A0A2P6P4S7_ROSCH Putative oxidoreductase OS=Rosa chinensis OX=74649 GN=RchiOBHm_C…	FAMILY NOT NAMED; FvH4_5g08700.t1_v4.0.a2; NAD(P)-bd_dom_sf; NAD(P)-binding Rossmann-fold domains;	NA	NA
IR_5646	-5.17214	0.0109402	Fvb5:4997111-4997463	Fvb5	4995019	4995726	FvH4_5g08710	+	1385	Downstream TTS	NA	NA	AT5G50700.1 | hydroxysteroid dehydrogenase 1 | Chr5:20623259-20624995 REVERSE LENGTH=349 | 201606; PREDICTED: 11-beta-hydroxysteroid dehydrogenase 1B-like [Fragaria vesca subsp. vesca]; sp|P0DKC6|HSD1B_ARATH 11-beta-hydroxysteroid dehydrogenase 1B OS=Arabidopsis thaliana OX=3702 GN=HSD1 PE=1 SV=1; tr|A0A2P6P4S7|A0A2P6P4S7_ROSCH Putative oxidoreductase OS=Rosa chinensis OX=74649 GN=RchiOBHm_Chr7g0…	adh_short; FAMILY NOT NAMED; FvH4_5g08710.t1_v4.0.a2; NAD(P)-bd_dom_sf; NAD(P)-binding Rossmann-fold domains; SDR_fam;	NA	NA
IR_1437	-5.08727	0.00296506	Fvb2:8880348-8880883	Fvb2	8876948	8877786	FvH4_2g10040	-	2562	Upstream TSS	0.969441	0.208335	AT4G34630.1 | prostatic spermine-binding-like protein | Chr4:16537093-16537692 REVERSE LENGTH=199 | 201606; hypothetical protein RchiOBHm_Chr6g0266971 [Rosa chinensis]; tr|A0A2P6PPT3|A0A2P6PPT3_ROSCH Uncharacterized protein OS=Rosa chinensis OX=74649 GN=RchiOBHm_Chr6g0266971 PE=4 SV=1	disorder_prediction; FvH4_2g10040.t1_v4.0.a2	NA	NA
IR_1437	-5.08727	0.00296506	Fvb2:8880348-8880883	Fvb2	8883182	8889748	FvH4_2g10050	-	2300	Downstream TTS	2.51339	1.13576e-16	AT2G21385.1 | hypothetical protein | Chr2:9149726-9151752 FORWARD LENGTH=330 | 201606; PREDICTED: uncharacterized protein LOC101295094 [Fragaria vesca subsp. vesca]; tr|A0A2P6PPW9|A0A2P6PPW9_ROSCH Uncharacterized protein OS=Rosa chinensis OX=74649 GN=RchiOBHm_Chr6g0266981 PE=4 SV=1	FAMILY NOT NAMED; FvH4_2g10050.t1_v4.0.a2	NA	NA
IR_1076	-5.05745	1.17046e-08	Fvb2:867270-867684	Fvb2	870385	871745	FvH4_2g00813	+	2702	Upstream TSS	NA	NA	PREDICTED: protein FAR1-RELATED SEQUENCE 5-like [Fragaria vesca subsp. vesca]; tr|A0A2G5CLD2|A0A2G5CLD2_AQUCA Uncharacterized protein OS=Aquilegia coerulea OX=218851 GN=AQUCO_04600031v1 PE=4 SV=1	FvH4_2g00813.t1_v4.0.a2	NA	NA
IR_270	-5.03224	0.00104684	Fvb1:8347335-8347787	Fvb1	8344180	8346096	FvH4_1g14900	+	1239	Downstream TTS	NA	NA	AT2G23620.1 | methyl esterase 1 | Chr2:10047462-10049248 REVERSE LENGTH=263 | 201606; PREDICTED: salicylic acid-binding protein 2-like [Fragaria vesca subsp. vesca]; sp|Q6RYA0|SABP2_TOBAC Salicylic acid-binding protein 2 OS=Nicotiana tabacum OX=4097 GN=SABP2 PE=1 SV=1; tr|A0A2P6RN11|A0A2P6RN11_ROSCH Putative 3-oxolaurate decarboxylase OS=Rosa chinensis OX=74649 GN=RchiOBHm_Chr2g0103951 PE=4 SV=1	AB_hydrolase; AB_hydrolase_1; Abhydrolase_6; ALPHA/BETA HYDROLASE FOLD-CONTAINING PROTEIN; alpha/beta-Hydrolases; FvH4_1g14900.t1_v4.0.a2;	NA	NA
IR_6790	-5.01226	1.03968e-10	Fvb6:2208748-2209379	Fvb6	2207468	2207864	FvH4_6g04060	+	884	Downstream TTS	NA	NA	PREDICTED: TMV resistance protein N-like isoform X2 [Fragaria vesca subsp. vesca]; tr|A0A2P6RE29|A0A2P6RE29_ROSCH Uncharacterized protein OS=Rosa chinensis OX=74649 GN=RchiOBHm_Chr3g0481891 PE=4 SV=1	FvH4_6g04060.t1_v4.0.a2	NA	NA
IR_6790	-5.01226	1.03968e-10	Fvb6:2208748-2209379	Fvb6	2212328	2213598	FvH4_6g04070	-	2950	Downstream TTS	NA	NA	putative DnaJ domain-containing protein [Rosa chinensis]; tr|A0A2P6R6I0|A0A2P6R6I0_ROSCH Putative DnaJ domain-containing protein OS=Rosa chinensis OX=74649 GN=RchiOBHm_Chr3g0453171 PE=4 SV=1	disorder_prediction; DNAJ HEAT SHOCK N-TERMINAL DOMAIN-CONTAINING PROTEIN; FAMILY NOT NAMED; FvH4_6g04070.t1_v4.0.a2	NA	NA
IR_3680	-5.00025	0.0212149	Fvb3:29726147-29726446	Fvb3	29724313	29724544	FvH4_3g34240	+	1603	Downstream TTS	NA	NA	AT2G01710.1 | Chaperone DnaJ-domain superfamily protein | Chr2:315836-316771 FORWARD LENGTH=311 | 201606; PREDICTED: uncharacterized protein LOC101294174 [Fragaria vesca subsp. vesca]; sp|Q9UXR9|DNAJ_METTE Chaperone protein DnaJ OS=Methanosarcina thermophila OX=2210 GN=dnaJ PE=3 SV=1; tr|A6XN08|A6XN08_PRUPE Uncharacterized protein OS=Prunus persica OX=3760 GN=PRUPE_1G531000 PE=4 SV=1	CHAPERONE DNAJ-DOMAIN SUPERFAMILY PROTEIN; Chaperone J-domain; DnaJ; DNAJ_2; DnaJ_domain; FAMILY NOT NAMED; FvH4_3g34240.t1_v4.0.a2; JDOMAIN; J_dom_sf	NA	NA
IR_8993	-4.89953	0.000365641	Fvb7:10521691-10522102	Fvb7	10515007	10519257	FvH4_7g11300	-	2434	Upstream TSS	0.0113427	0.998951	AT1G20770.1 | coiled-coil protein | Chr1:7215345-7216648 REVERSE LENGTH=215 | 201606; PREDICTED: coiled-coil domain-containing protein 115 isoform X1 [Fragaria vesca subsp. vesca]; tr|A0A2P6SFT4|A0A2P6SFT4_ROSCH Uncharacterized protein OS=Rosa chinensis OX=74649 GN=RchiOBHm_Chr1g0349471 PE=4 SV=1	disorder_prediction; FAMILY NOT NAMED; FvH4_7g11300.t1_v4.0.a2; vacuolar proton-transporting V-type ATPase complex assembly; Vma22/CCDC115	vacuolar proton-transporting V-type ATPase complex assembly	GO:0070072
IR_3444	-4.68137	0.0386132	Fvb3:23468981-23469360	Fvb3	23469840	23471776	FvH4_3g30250	-	481	Downstream TTS	NA	NA	AT5G22860.8 | Serine carboxypeptidase S28 family protein | Chr5:7641322-7642945 REVERSE LENGTH=366 | 201606; lysosomal Pro-X carboxypeptidase-like isoform X2 [Quercus suber]; sp|Q5RBU7|PCP_PONAB Lysosomal Pro-X carboxypeptidase OS=Pongo abelii OX=9601 GN=PRCP PE=2 SV=1; tr|A0A371H526|A0A371H526_MUCPR Lysosomal Pro-X carboxypeptidase (Fragment) OS=Mucuna pruriens OX=157652 GN=PRCP PE=4 SV=1	AB_hydrolase; alpha/beta-Hydrolases; FvH4_3g30250.t1_v4.0.a2; Peptidase_S28; PROTEASE S28 PRO-X CARBOXYPEPTIDASE-RELATED; proteolysis; Ser_carbopepase_S28_SKS; serine-type peptidase activity;	proteolysis; serine-type peptidase activity	GO:0006508; GO:0008236
IR_1907	-4.60106	0.00799508	Fvb2:16655595-16655795	Fvb2	16652562	16653150	FvH4_2g19710	+	2445	Downstream TTS	NA	NA	tr|A0A2P6PT67|A0A2P6PT67_ROSCH Uncharacterized protein OS=Rosa chinensis OX=74649 GN=RchiOBHm_Chr6g0280231 PE=4 SV=1	disorder_prediction; FvH4_2g19710.t1_v4.0.a2	NA	NA
IR_6769	-4.52063	0.0195642	Fvb6:1380751-1381177	Fvb6	1376685	1378759	FvH4_6g02390	-	1992	Upstream TSS	NA	NA	AT1G66170.1 | RING/FYVE/PHD zinc finger superfamily protein | Chr1:24638793-24641222 REVERSE LENGTH=704 | 201606; PREDICTED: PHD finger protein MALE MEIOCYTE DEATH 1-like [Fragaria vesca subsp. vesca]; sp|Q7X6Y7|MMD1_ARATH PHD finger protein MALE MEIOCYTE DEATH 1 OS=Arabidopsis thaliana OX=3702 GN=MMD1 PE=2 SV=1; tr|A0A2P6R5P6|A0A2P6R5P6_ROSCH Uncharacterized protein OS=Rosa chinensis OX=74649 GN…	disorder_prediction; FAMILY NOT NAMED; FvH4_6g02390.t1_v4.0.a2;	NA	NA
IR_6769	-4.52063	0.0195642	Fvb6:1380751-1381177	Fvb6	1381471	1382416	FvH4_6g02391	-	295	Downstream TTS	NA	NA	AT4G22390.2 | F-box associated ubiquitination effector family protein | Chr4:11813757-11815074 REVERSE LENGTH=401 | 201606; PREDICTED: F-box/kelch-repeat protein At3g23880-like [Fragaria vesca subsp. vesca]; sp|Q9SUY0|FB244_ARATH F-box protein At4g22390 OS=Arabidopsis thaliana OX=3702 GN=At4g22390 PE=2 SV=3; tr|A0A314XMI0|A0A314XMI0_PRUYE F-box/kelch-repeat protein OS=Prunus yedoensis var. nudifl…	FAMILY NOT NAMED; FBA_3; F-box-assoc_dom_typ3; F-box-assoc_interact_dom; FvH4_6g02391.t1_v4.0.a2; ; TIGR01640	NA	NA
IR_4105	-4.50286	5.61181e-10	Fvb4:474662-474845	Fvb4	475826	478208	FvH4_4g00530	+	982	Upstream TSS	NA	NA	AT3G22980.3 | Ribosomal protein S5/Elongation factor G/III/V family protein | Chr3:8160269-8163316 REVERSE LENGTH=1015 | 201606; putative protein-synthesizing GTPase [Rosa chinensis]; sp|Q7Z2Z2|EFL1_HUMAN Elongation factor-like GTPase 1 OS=Homo sapiens OX=9606 GN=EFL1 PE=1 SV=2; tr|A0A2P6PRW3|A0A2P6PRW3_ROSCH Uncharacterized protein OS=Rosa chinensis OX=74649 GN=RchiOBHm_Chr6g0274771 PE=4 SV=1	disorder_prediction; FAMILY NOT NAMED; FvH4_4g00530.t1_v4.0.a2;	NA	NA
IR_4105	-4.50286	5.61181e-10	Fvb4:474662-474845	Fvb4	466457	474236	FvH4_4g00520	+	426	Downstream TTS	-0.747262	0.0713189	AT2G32700.6 | LEUNIG-like protein | Chr2:13867235-13871844 FORWARD LENGTH=785 | 201606; PREDICTED: transcriptional corepressor LEUNIG [Fragaria vesca subsp. vesca] &gt;gi|764570217|ref|XP_011462525.1| PREDICTED: transcriptional corepressor LEUNIG [Fragaria vesca subsp. vesca]; sp|O48847|LUH_ARATH Transcriptional corepressor LEUNIG_HOMOLOG OS=Arabidopsis thaliana OX=3702 GN=LUH PE=1 SV=1; tr|A0A2P…	Coil; disorder_prediction; FAMILY NOT NAMED; FvH4_4g00520.t1_v4.0.a2; G-protein_beta_WD-40_rep; GPROTEINBRPT; LisH; protein binding; TRANSCRIPTIONAL COREPRESSOR LEUNIG_HOMOLOG; WD40; WD40_repeat; WD40_repeat_CS; WD40_repeat_dom; WD40_repeat_dom_sf; WD40 repeat-like; WD40/YVTN_repeat-like_dom_sf; WD_REPEATS_1; WD_REPEATS_2; WD_REPEATS_REGION	protein binding	GO:0005515
IR_5634	-4.47905	0.0289791	Fvb5:4639338-4639782	Fvb5	4640509	4656444	FvH4_5g08020	+	728	Upstream TSS	7.43524	0.00939956	AT1G26255.3 | hypothetical protein | Chr1:9083931-9085238 REVERSE LENGTH=340 | 201606; tr|A0A2P6QFG8|A0A2P6QFG8_ROSCH Uncharacterized protein OS=Rosa chinensis OX=74649 GN=RchiOBHm_Chr5g0051631 PE=4 SV=1; uncharacterized protein LOC112165215 [Rosa chinensis]	FvH4_5g08020.t1_v4.0.a2; FvH4_5g08020.t5_v4.0.a2; FvH4_5g08020.t7_v4.0.a2	NA	NA
IR_4646	-4.46037	0.0212149	Fvb4:14637130-14637536	Fvb4	14638712	14656957	FvH4_4g10960	+	1177	Upstream TSS	0.0460676	0.899014	AT2G43400.1 | electron-transfer flavoprotein:ubiquinone oxidoreductase | Chr2:18021304-18025041 FORWARD LENGTH=633 | 201606; PREDICTED: electron transfer flavoprotein-ubiquinone oxidoreductase, mitochondrial isoform X3 [Fragaria vesca subsp. vesca]; sp|O22854|ETFQO_ARATH Electron transfer flavoprotein-ubiquinone oxidoreductase, mitochondrial OS=Arabidopsis thaliana OX=3702 GN=ETFQO PE=2 SV=1; tr|…	4Fe-4S ferredoxins; ELECTRON TRANSFER FLAVOPROTEIN-UBIQUINONE OXIDOREDUCTASE; ELECTRON TRANSFER FLAVOPROTEIN-UBIQUINONE OXIDOREDUCTASE, MITOCHONDRIAL; electron-transferring-flavoprotein dehydrogenase activity; electron transport chain; ETF-QO; ETF_QO; FAD-linked reductases, C-terminal domain; FAD/NAD-bd_sf; FAD/NAD(P)-binding domain; FvH4_4g10960.t1_v4.0.a2; NAD_binding_8; Respiratory electron tr…	electron-transferring-flavoprotein dehydrogenase activity; electron transport chain	GO:0004174; GO:0022900
IR_5064	-4.46015	0.0122673	Fvb4:23468751-23469038	Fvb4	23469528	23470564	FvH4_4g20040	-	491	Downstream TTS	NA	NA	PREDICTED: dentin sialophosphoprotein-like [Fragaria vesca subsp. vesca]; tr|A0A251QW57|A0A251QW57_PRUPE Uncharacterized protein OS=Prunus persica OX=3760 GN=PRUPE_1G115300 PE=4 SV=1	disorder_prediction; FvH4_4g20040.t1_v4.0.a2; FvH4_4g20040.t2_v4.0.a2; FvH4_4g20040.t3_v4.0.a2	NA	NA
IR_439	-4.39292	0.00138037	Fvb1:12219096-12219635	Fvb1	12221740	12224996	FvH4_1g20050	-	2106	Downstream TTS	-0.500223	0.0427909	AT2G22475.1 | GRAM domain family protein | Chr2:9541523-9544778 FORWARD LENGTH=299 | 201606; PREDICTED: GLABRA2 expression modulator-like [Fragaria vesca subsp. vesca]; sp|Q8S8F8|GEM_ARATH GLABRA2 expression modulator OS=Arabidopsis thaliana OX=3702 GN=GEM PE=1 SV=1; tr|A0A2P6RQ62|A0A2P6RQ62_ROSCH Putative GRAM domain-containing protein OS=Rosa chinensis OX=74649 GN=RchiOBHm_Chr2g0112041 PE=4 SV=1	disorder_prediction; FAMILY NOT NAMED; FvH4_1g20050.t1_v4.0.a2; GEM-like; GEM-LIKE PROTEIN 3-RELATED; GRAM; PH-GRAM_GEM; PH-like_dom_sf	NA	NA
IR_1134	-4.35081	0.0195642	Fvb2:2253402-2253908	Fvb2	2250268	2251030	FvH4_2g02860	+	2372	Downstream TTS	10.9494	0.0593737	AT4G33720.1 | CAP (Cysteine-rich secretory proteins%2C Antigen 5%2C and Pathogenesis-related 1 protein) superfamily protein | Chr4:16182813-16183304 FORWARD LENGTH=163 | 201606; PREDICTED: pathogenesis-related protein 1A-like [Fragaria vesca subsp. vesca]; sp|P09042|PR1C_TOBAC Pathogenesis-related protein 1C OS=Nicotiana tabacum OX=4097 PE=2 SV=3; tr|A0A2P6PJU6|A0A2P6PJU6_ROSCH Uncharacterized pr…	Allrgn_V5/Tpx1_CS; CAP; CAP (CYSTEINE-RICH SECRETORY PROTEINS, ANTIGEN 5, AND PATHOGENESIS-RELATED 1 PROTEIN) SUPERFAMILY PROTEIN; CAP_domain; CAP_sf; CRISP_1; CRISP_2; CRISP-related; CYSTEINE-RICH SECRETORY PROTEIN-RELATED; extracellular region; FvH4_2g02860.t1_v4.0.a2; PR-1-like; SCP_PR-1_like; SCP_PR1-like; V5ALLERGEN; V5_allergen-like; V5TPXLIKE	extracellular region	GO:0005576
IR_1134	-4.35081	0.0195642	Fvb2:2253402-2253908	Fvb2	2254447	2258069	FvH4_2g02870	-	540	Downstream TTS	NA	NA	AT1G50110.1 | D-aminoacid aminotransferase-like PLP-dependent enzymes superfamily protein | Chr1:18558203-18560219 REVERSE LENGTH=356 | 201606; PREDICTED: branched-chain-amino-acid aminotransferase 6-like isoform X1 [Fragaria vesca subsp. vesca]; sp|Q9LPM9|BCAT6_ARATH Branched-chain-amino-acid aminotransferase 6 OS=Arabidopsis thaliana OX=3702 GN=BCAT6 PE=1 SV=1; tr|A0A2P6PJR3|A0A2P6PJR3_ROSCH Pu…	AA_TRANSFER_CLASS_4; Aminotran_4; Aminotransferase-like; Aminotrans_IV; Aminotrans_IV_CS; B_amino_transII; BCAT1; BCAT_beta_family; BCAT_family; BRANCHED-CHAIN-AMINO-ACID AMINOTRANSFERASE 7-RELATED; Branched-chain amino acid catabolism; branched-chain amino acid metabolic process; branched-chain-amino-acid transaminase activity; catalytic activity; Cysteine and methionine metabolism; D-aminoacid …	branched-chain amino acid metabolic process; branched-chain-amino-acid transaminase activity; catalytic activity	GO:0003824; GO:0004084; GO:0009081
IR_1646	-4.29613	0.00999854	Fvb2:12249275-12249645	Fvb2	12238779	12246567	FvH4_2g13940	+	2708	Downstream TTS	0.933189	0.195495	AT1G76810.1 | eukaryotic translation initiation factor 2 (eIF-2) family protein | Chr1:28831366-28836310 REVERSE LENGTH=1294 | 201606; PREDICTED: eukaryotic translation initiation factor 5B [Fragaria vesca subsp. vesca]; sp|Q10251|IF2P_SCHPO Eukaryotic translation initiation factor 5B OS=Schizosaccharomyces pombe (strain 972 / ATCC 24843) OX=284812 GN=SPAC56F8.03 PE=1 SV=1; tr|A0A2P6PS30|A0A2P6PS…	aeIF5B_II; Coil; disorder_prediction; EFTu-like_2; ELONGATNFCT; FAMILY NOT NAMED; FvH4_2g13940.t1_v4.0.a2; FvH4_2g13940.t2_v4.0.a2; GTPase activity; GTP binding; GTP_EFTU; GTP_EFTU_D2; G_TR_2; IF-2; IF2_aeIF5B_IV; IF2_eIF5B; Initiation factor IF2/eIF5b, domain 3; P-loop containing nucleoside triphosphate hydrolases; P-loop_NTPase; ; Small_GTP-bd_dom; TF_GTP-bd_dom; TIF_IF2; TIF_IF2_dom3; TIF_IF2_…	GTPase activity; GTP binding	GO:0003924; GO:0005525
IR_1646	-4.29613	0.00999854	Fvb2:12249275-12249645	Fvb2	12251439	12254650	FvH4_2g13941	-	1795	Downstream TTS	NA	NA	AT2G19360.1 | tRNA-splicing ligase%2C putative (DUF239) | Chr2:8378664-8383374 FORWARD LENGTH=426 | 201606; PREDICTED: uncharacterized protein LOC101314724 [Fragaria vesca subsp. vesca]; tr|A0A1R3FYY0|A0A1R3FYY0_9ROSI Uncharacterized protein OS=Corchorus olitorius OX=93759 GN=COLO4_37839 PE=4 SV=1	FAMILY NOT NAMED; FvH4_2g13941.t1_v4.0.a2; Neprosin	NA	NA
IR_2305	-4.28964	0.000147303	Fvb2:28063567-28064264	Fvb2	28057942	28061021	FvH4_2g38920	-	2546	Upstream TSS	1.71396	NA	AT1G75500.2 | Walls Are Thin 1 | Chr1:28338282-28340091 REVERSE LENGTH=389 | 201606; PREDICTED: protein WALLS ARE THIN 1 [Fragaria vesca subsp. vesca]; sp|Q94AP3|WAT1_ARATH Protein WALLS ARE THIN 1 OS=Arabidopsis thaliana OX=3702 GN=WAT1 PE=1 SV=1; tr|A0A2P6PYW5|A0A2P6PYW5_ROSCH WAT1-related protein OS=Rosa chinensis OX=74649 GN=RchiOBHm_Chr6g0302011 PE=3 SV=1	disorder_prediction; EamA; EamA_dom; FAMILY NOT NAMED; FvH4_2g38920.t1_v4.0.a2; integral component of membrane; membrane; Multidrug resistance efflux transporter EmrE; ; transmembrane transporter activity; WAT1-related	integral to membrane; membrane; transmembrane transporter activity	GO:0016020; GO:0016021; GO:0022857
IR_8793	-4.25305	9.23005e-05	Fvb7:5506847-5507543	Fvb7	5509308	5511859	FvH4_7g05130	+	1766	Upstream TSS	0.366503	0.325516	PREDICTED: uncharacterized protein LOC101313634 [Fragaria vesca subsp. vesca]; sp|P76093|YNBD_ECOLI Uncharacterized protein YnbD OS=Escherichia coli (strain K12) OX=83333 GN=ynbD PE=1 SV=1; tr|A0A2P6SBL1|A0A2P6SBL1_ROSCH Putative phosphoric monoester hydrolase OS=Rosa chinensis OX=74649 GN=RchiOBHm_Chr1g0331721 PE=4 SV=1	dephosphorylation; DSPc; Dual-sp_phosphatase_cat-dom; FAMILY NOT NAMED; FvH4_7g05130.t1_v4.0.a2; phosphatase activity; (Phosphotyrosine protein) phosphatases II; protein tyrosine/serine/threonine phosphatase activity; Prot-tyrosine_phosphatase-like; ; TYR_PHOSPHATASE_2; TYR_PHOSPHATASE_dom	dephosphorylation; phosphatase activity; protein tyrosine/serine/threonine phosphatase activity	GO:0008138; GO:0016311; GO:0016791
IR_6854	-4.23454	0.00518155	Fvb6:4109988-4110212	Fvb6	4112938	4114989	FvH4_6g06820	+	2727	Upstream TSS	NA	NA	AT3G06240.1 | F-box family protein | Chr3:1887336-1888619 FORWARD LENGTH=427 | 201606; PREDICTED: F-box/kelch-repeat protein At3g06240-like [Fragaria vesca subsp. vesca]; sp|Q8GXC7|FBK50_ARATH F-box/kelch-repeat protein At3g06240 OS=Arabidopsis thaliana OX=3702 GN=At3g06240 PE=2 SV=1; tr|A0A2P6R7A8|A0A2P6R7A8_ROSCH Putative F-box domain-containing protein OS=Rosa chinensis OX=74649 GN=RchiOBHm_Ch…	FAMILY NOT NAMED; FBA_1; F-box; F-box-assoc_dom_typ1; F-box-assoc_interact_dom; F-box_dom; F-box domain; F-box-like_dom_sf; FvH4_6g06820.t1_v4.0.a2; protein binding; ; TIGR01640	protein binding	GO:0005515
IR_4655	-4.20505	0.0480515	Fvb4:14945725-14946181	Fvb4	14937537	14944472	FvH4_4g11140	-	1253	Upstream TSS	0	1	AT2G31500.1 | calcium-dependent protein kinase 24 | Chr2:13414016-13416324 FORWARD LENGTH=582 | 201606; PREDICTED: calcium-dependent protein kinase 24 [Fragaria vesca subsp. vesca]; sp|Q9SIQ7|CDPKO_ARATH Calcium-dependent protein kinase 24 OS=Arabidopsis thaliana OX=3702 GN=CPK24 PE=2 SV=1; tr|A0A2P6QUK8|A0A2P6QUK8_ROSCH Uncharacterized protein OS=Rosa chinensis OX=74649 GN=RchiOBHm_Chr4g0407071 …	ATP binding; CALCIUM-DEPENDENT PROTEIN KINASE 24; calcium ion binding; EF-hand; EF_HAND_1; EF_Hand_1_Ca_BS; EF_HAND_2; EF-hand_7; EF-hand_8; EF_hand_dom; EF-hand-dom_pair; FvH4_4g11140.t1_v4.0.a2; Kinase-like_dom_sf; Pkinase; protein kinase activity; PROTEIN_KINASE_ATP; Protein_kinase_ATP_BS; PROTEIN_KINASE_DOM; Protein kinase-like (PK-like); PROTEIN_KINASE_ST; protein phosphorylation; Prot_kinas…	ATP binding; calcium ion binding; protein kinase activity; protein phosphorylation	GO:0004672; GO:0005509; GO:0005524; GO:0006468
IR_8943	-4.19997	0.00519799	Fvb7:9550811-9551225	Fvb7	9552219	9553071	FvH4_7g10112	-	995	Downstream TTS	NA	NA	AT3G11010.6 | receptor like protein 34 | Chr3:3450988-3453672 REVERSE LENGTH=861 | 201606; PREDICTED: receptor-like protein 12 [Fragaria vesca subsp. vesca]; sp|Q9SRL2|RLP34_ARATH Receptor-like protein 34 OS=Arabidopsis thaliana OX=3702 GN=RLP34 PE=2 SV=1; tr|A0A2P6SDE3|A0A2P6SDE3_ROSCH Putative leucine-rich repeat-containing, plant-type, leucine-rich repeat domain, L OS=Rosa chinensis OX=74649 G…	disorder_prediction; FAMILY NOT NAMED; FvH4_7g10112.t1_v4.0.a2; L domain-like; Leu-rich_rpt; LRR_1; protein binding;	protein binding	GO:0005515
IR_8943	-4.19997	0.00519799	Fvb7:9550811-9551225	Fvb7	9553160	9553959	FvH4_7g10113	-	1936	Downstream TTS	NA	NA	AT2G33060.1 | receptor like protein 27 | Chr2:14025661-14028087 FORWARD LENGTH=808 | 201606; receptor like protein 7-like [Rosa chinensis] &gt;gi|1358182237|gb|PRQ56711.1| putative leucine-rich repeat-containing, plant-type, leucine-rich repeat domain, L [Rosa chinensis]; sp|F4IUU1|RLP27_ARATH Receptor like protein 27 OS=Arabidopsis thaliana OX=3702 GN=RLP27 PE=2 SV=1; tr|A0A2P6SDE3|A0A2P6SDE3_RO…	FAMILY NOT NAMED; FvH4_7g10113.t1_v4.0.a2; L domain-like; Leu-rich_rpt; LEURICHRPT; LRR_1; LRR_8; LRR_dom_sf; protein binding; RECEPTOR LIKE PROTEIN 46	protein binding	GO:0005515
IR_8943	-4.19997	0.00519799	Fvb7:9550811-9551225	Fvb7	9554188	9557010	FvH4_7g10114	-	2964	Downstream TTS	NA	NA	AT1G47890.1 | receptor like protein 7 | Chr1:17643976-17647035 FORWARD LENGTH=1019 | 201606; PREDICTED: putative receptor-like protein kinase At3g47110 [Prunus mume]; sp|Q9C699|RLP7_ARATH Receptor-like protein 7 OS=Arabidopsis thaliana OX=3702 GN=RLP7 PE=3 SV=2; tr|A0A2P6SFB7|A0A2P6SFB7_ROSCH Putative leucine-rich repeat-containing, plant-type, leucine-rich repeat domain, L OS=Rosa chinensis OX=7…	FAMILY NOT NAMED; FvH4_7g10114.t1_v4.0.a2; Leu-rich_rpt; LRR_6; LRR_8; LRR_dom_sf; protein binding; RNI-like;	protein binding	GO:0005515
IR_8698	-4.17941	0.00335113	Fvb7:3205389-3205981	Fvb7	3208758	3217208	FvH4_7g02900	+	2778	Upstream TSS	NA	NA	AT1G15120.1 | Ubiquinol-cytochrome C reductase hinge protein | Chr1:5203091-5203897 FORWARD LENGTH=69 | 201606; PREDICTED: cytochrome b-c1 complex subunit 6-like [Fragaria vesca subsp. vesca]; sp|P48504|QCR6_SOLTU Cytochrome b-c1 complex subunit 6 OS=Solanum tuberosum OX=4113 PE=1 SV=2; tr|A0A314XSR3|A0A314XSR3_PRUYE Cytochrome b-c1 complex subunit 6-like OS=Prunus yedoensis var. nudiflora OX=209…	Bc1_11K; Cyt_b-c1_6; FvH4_7g02900.t1_v4.0.a2; mitochondrial electron transport, ubiquinol to cytochrome c; Non-heme 11 kDa protein of cytochrome bc1 complex (Ubiquinol-cytochrome c reductase); ; ubiquinol-cytochrome-c reductase activity; UBIQUINOL-CYTOCHROME C REDUCTASE COMPLEX 7.8 KDA PROTEIN; Ubol_cytC_Rdtase_hinge_dom; Ubol_cytC_Rdtase_hinge_dom_sf; UCR_hinge	mitochondrial electron transport, ubiquinol to cytochrome c; ubiquinol-cytochrome-c reductase activity	GO:0006122; GO:0008121
IR_8756	-4.1719	0.021145	Fvb7:4601620-4602018	Fvb7	4604649	4605650	FvH4_7g04030	-	2632	Downstream TTS	NA	NA	AT5G06570.4 | alpha/beta-Hydrolases superfamily protein | Chr5:2008075-2011058 REVERSE LENGTH=344 | 201606; probable carboxylesterase 15 [Rosa chinensis] &gt;gi|1358181260|gb|PRQ55734.1| putative carboxylesterase [Rosa chinensis]; sp|Q9FG13|CXE15_ARATH Probable carboxylesterase 15 OS=Arabidopsis thaliana OX=3702 GN=CXE15 PE=2 SV=1; tr|A0A2P6SAN7|A0A2P6SAN7_ROSCH Putative carboxylesterase OS=Rosa …	AB_hydrolase; Abhydrolase_3; AB_hydrolase_3; alpha/beta-Hydrolases; FvH4_7g04030.t1_v4.0.a2; hydrolase activity; MEMBER OF 'GDXG' FAMILY OF LIPOLYTIC ENZYMES;	hydrolase activity	GO:0016787
IR_5783	-4.16879	0.0354292	Fvb5:9024119-9024813	Fvb5	9016574	9022865	FvH4_5g15940	-	1254	Upstream TSS	1.01444	0.0343129	AT3G01780.1 | ARM repeat superfamily protein | Chr3:279171-283399 FORWARD LENGTH=1176 | 201606; PREDICTED: protein TPLATE [Fragaria vesca subsp. vesca]; sp|F4J8D3|TPLAT_ARATH Protein TPLATE OS=Arabidopsis thaliana OX=3702 GN=TPLATE PE=1 SV=1; tr|A0A2P6P296|A0A2P6P296_ROSCH Uncharacterized protein OS=Rosa chinensis OX=74649 GN=RchiOBHm_Chr7g0180111 PE=4 SV=1	ARM repeat; ARM-type_fold; Coil; disorder_prediction; endocytosis; FAMILY NOT NAMED; FvH4_5g15940.t1_v4.0.a2; TPLATE	endocytosis	GO:0006897
IR_7543	-4.16504	0.000261273	Fvb6:18279308-18279694	Fvb6	18282554	18285274	FvH4_6g24260	+	2861	Upstream TSS	NA	NA	AT3G21090.1 | ABC-2 type transporter family protein | Chr3:7391497-7394933 REVERSE LENGTH=691 | 201606; PREDICTED: ABC transporter G family member 15-like isoform X1 [Fragaria vesca subsp. vesca]; sp|Q8RWI9|AB15G_ARATH ABC transporter G family member 15 OS=Arabidopsis thaliana OX=3702 GN=ABCG15 PE=2 SV=2; tr|A0A2P6REE6|A0A2P6REE6_ROSCH Putative sulfate-transporting ATPase OS=Rosa chinensis OX=746…	ABC2_membrane; ABC_2_trans; ABC_tran; ABC_transporter-like; ABC transporters in lipid homeostasis; ATPase activity; ATP binding; ATP-BINDING CASSETTE TRANSPORTER; FvH4_6g24260.t1_v4.0.a2; membrane; P-loop containing nucleoside triphosphate hydrolases; P-loop_NTPase;	ATP binding; ATP hydrolysis activity; membrane	GO:0005524; GO:0016020; GO:0016887
IR_8388	-4.16229	0.000715211	Fvb6:34301905-34302297	Fvb6	34298579	34299291	FvH4_6g44540	-	2614	Upstream TSS	NA	NA	AT3G63310.1 | Bax inhibitor-1 family protein | Chr3:23387938-23388882 REVERSE LENGTH=239 | 201606; PREDICTED: BI1-like protein [Fragaria vesca subsp. vesca]; sp|Q9M1V9|LFG2_ARATH Protein LIFEGUARD 2 OS=Arabidopsis thaliana OX=3702 GN=LFG2 PE=2 SV=1; tr|A0A2P6PVT2|A0A2P6PVT2_ROSCH Uncharacterized protein OS=Rosa chinensis OX=74649 GN=RchiOBHm_Chr6g0290181 PE=3 SV=1	Bax1-I; Bax_inhibitor_1-related; BAX INHIBITOR-RELATED; FvH4_6g44540.t1_v4.0.a2;	NA	NA
IR_8388	-4.16229	0.000715211	Fvb6:34301905-34302297	Fvb6	34304075	34304608	FvH4_6g44541	+	1779	Upstream TSS	NA	NA	AT4G16740.1 | terpene synthase 03 | Chr4:9407856-9410877 FORWARD LENGTH=565 | 201606; PREDICTED: tricyclene synthase EBOS, chloroplastic-like [Fragaria vesca subsp. vesca]; sp|B9T825|TPS12_RICCO Probable terpene synthase 12 OS=Ricinus communis OX=3988 GN=TPS12 PE=3 SV=1; tr|A0A2P6REV6|A0A2P6REV6_ROSCH Putative lyase OS=Rosa chinensis OX=74649 GN=RchiOBHm_Chr3g0484891 PE=3 SV=1	FAMILY NOT NAMED; FvH4_6g44541.t1_v4.0.a2; lyase activity; ; Terpene_synth; terpene synthase activity; Terpene_synth_N; Terpene_synth_N_sf; Terpenoid_cyclase/PrenylTrfase; Terpenoid cyclases/Protein prenyltransferases	lyase activity; terpene synthase activity	GO:0010333; GO:0016829
IR_7074	-4.15357	0.00401251	Fvb6:8710397-8710771	Fvb6	8711273	8712012	FvH4_6g14180	-	503	Downstream TTS	NA	NA	AT2G37530.1 | forkhead box protein G1 | Chr2:15751060-15751428 FORWARD LENGTH=122 | 201606; PREDICTED: uncharacterized protein LOC101293704 [Fragaria vesca subsp. vesca]; tr|A0A2P6RA72|A0A2P6RA72_ROSCH Uncharacterized protein OS=Rosa chinensis OX=74649 GN=RchiOBHm_Chr3g0467161 PE=4 SV=1	FAMILY NOT NAMED; FORKHEAD BOX PROTEIN G1; FvH4_6g14180.t1_v4.0.a2	NA	NA
IR_7761	-4.0798	8.82166e-05	Fvb6:21799603-21799994	Fvb6	21796424	21798295	FvH4_6g28320	-	1308	Upstream TSS	NA	NA	leucine-rich repeat extensin-like protein 2 [Rosa chinensis] &gt;gi|1358175889|gb|PRQ50364.1| hypothetical protein RchiOBHm_Chr2g0132371 [Rosa chinensis]; tr|A0A2P6RVB5|A0A2P6RVB5_ROSCH Uncharacterized protein OS=Rosa chinensis OX=74649 GN=RchiOBHm_Chr2g0132371 PE=4 SV=1	disorder_prediction; FvH4_6g28320.t1_v4.0.a2	NA	NA
IR_6897	-4.07729	3.06502e-08	Fvb6:5073742-5073998	Fvb6	5075370	5076246	FvH4_6g08570	-	1373	Downstream TTS	-1.22302	0.414152	AT5G48670.1 | AGAMOUS-like 80 | Chr5:19738825-19739790 REVERSE LENGTH=321 | 201606; PREDICTED: agamous-like MADS-box protein AGL80 [Fragaria vesca subsp. vesca]; sp|Q9FJK3|AGL80_ARATH Agamous-like MADS-box protein AGL80 OS=Arabidopsis thaliana OX=3702 GN=AGL80 PE=1 SV=1; tr|A0A2P6R7W1|A0A2P6R7W1_ROSCH Putative transcription factor MADS-type1 family OS=Rosa chinensis OX=74649 GN=RchiOBHm_Chr3g0458…	AGAMOUS-LIKE MADS-BOX PROTEIN AGL80; Coil; disorder_prediction; DNA binding; DNA-binding transcription factor activity, RNA polymerase II-specific; Estrogen-dependent nuclear events downstream of ESR-membrane signaling; FvH4_6g08570.t1_v4.0.a2; MADS_BOX_2; MADS BOX PROTEIN; MADSDOMAIN; MADS_SRF-like; MADS_SRF_like; Myogenesis; positive regulation of transcription by RNA polymerase II; protein dim…	cis-regulatory region sequence-specific DNA binding; DNA binding; DNA-binding transcription factor activity, RNA polymerase II-specific; positive regulation of transcription by RNA polymerase II; protein dimerization activity	GO:0000981; GO:0000987; GO:0003677; GO:0045944; GO:0046983
IR_1736	-4.03043	0.00639215	Fvb2:13554894-13555331	Fvb2	13558307	13563884	FvH4_2g15400	+	2977	Upstream TSS	0.469559	0.663822	AT1G21380.1 | Target of Myb protein 1 | Chr1:7485806-7488032 REVERSE LENGTH=506 | 201606; PREDICTED: target of Myb protein 1-like [Fragaria vesca subsp. vesca]; sp|Q9LPL6|TOL3_ARATH TOM1-like protein 3 OS=Arabidopsis thaliana OX=3702 GN=TOL3 PE=1 SV=1; tr|A0A2P6PSN7|A0A2P6PSN7_ROSCH Putative target of Myb protein OS=Rosa chinensis OX=74649 GN=RchiOBHm_Chr6g0278141 PE=4 SV=1	disorder_prediction; ENTH_VHS; ENTH/VHS domain; FAMILY NOT NAMED; FvH4_2g15400.t1_v4.0.a2; FvH4_2g15400.t3_v4.0.a2; FvH4_2g15400.t6_v4.0.a2; GAT; GAT_dom; GAT_GGA_like_plant; GAT-like domain; GAT_sf; intracellular protein transport; TOM1; TOM1-LIKE PROTEIN 4; VHS; VHS_dom	intracellular protein transport	GO:0006886
IR_5998	-4.00042	0.00214733	Fvb5:13432920-13433364	Fvb5	13431127	13431706	FvH4_5g22090	-	1214	Upstream TSS	-1.63897	0.481909	AT5G46770.1 | hypothetical protein | Chr5:18977494-18977895 FORWARD LENGTH=133 | 201606; PREDICTED: uncharacterized protein LOC105351901 [Fragaria vesca subsp. vesca]; tr|A0A2P6PA08|A0A2P6PA08_ROSCH Uncharacterized protein OS=Rosa chinensis OX=74649 GN=RchiOBHm_Chr7g0209741 PE=4 SV=1	FAMILY NOT NAMED; FvH4_5g22090.t1_v4.0.a2	NA	NA
IR_4368	-3.98967	0.00309012	Fvb4:5619086-5619485	Fvb4	5620413	5621547	FvH4_4g06310	-	929	Downstream TTS	1.87498	0.123793	AT5G07610.1 | F-box family protein | Chr5:2406068-2407330 FORWARD LENGTH=420 | 201606; PREDICTED: F-box protein At5g07610-like [Fragaria vesca subsp. vesca]; sp|Q9FLS0|FB253_ARATH F-box protein At5g07610 OS=Arabidopsis thaliana OX=3702 GN=At5g07610 PE=2 SV=1; tr|A0A2P6QS92|A0A2P6QS92_ROSCH Putative F-box domain-containing protein OS=Rosa chinensis OX=74649 GN=RchiOBHm_Chr4g0398071 PE=4 SV=1	FAMILY NOT NAMED; F-box; F-box-assoc_interact_dom; F-box_dom; F-box domain; F-box-like_dom_sf; FvH4_4g06310.t1_v4.0.a2; protein binding; ; TIGR01640	protein binding	GO:0005515
IR_8029	-3.91477	0.0323735	Fvb6:26695135-26695496	Fvb6	26689622	26693013	FvH4_6g33670	-	2122	Upstream TSS	-0.0924437	0.882015	AT1G17640.3 | RNA-binding (RRM/RBD/RNP motifs) family protein | Chr1:6067394-6069098 REVERSE LENGTH=369 | 201606; PREDICTED: heterogeneous nuclear ribonucleoprotein 1 [Fragaria vesca subsp. vesca]; sp|Q8W034|RNP1_ARATH Heterogeneous nuclear ribonucleoprotein 1 OS=Arabidopsis thaliana OX=3702 GN=RNP1 PE=1 SV=1; tr|A0A2P6RY63|A0A2P6RY63_ROSCH Putative nucleotide-binding alpha-beta plait domain-cont…	BOULE/DAZ; BOULE-RELATED; disorder_prediction; FvH4_6g33670.t1_v4.0.a2; GENE 17190-RELATED; germ cell development; mRNA binding; nucleic acid binding; Nucleotide-bd_a/b_plait_sf; RBD_domain_sf; RNA-binding domain, RBD; RRM; RRM_1; RRM_dom	germ cell development; mRNA binding; nucleic acid binding	GO:0003676; GO:0003729; GO:0007281
IR_2493	-3.89822	0.000672734	Fvb3:4734862-4735255	Fvb3	4736195	4737754	FvH4_3g08030	-	941	Downstream TTS	NA	NA	AT2G27420.1 | Cysteine proteinases superfamily protein | Chr2:11726311-11727519 REVERSE LENGTH=348 | 201606; PREDICTED: xylem cysteine proteinase 1-like [Fragaria vesca subsp. vesca]; sp|A2XQE8|SAG39_ORYSI Senescence-specific cysteine protease SAG39 OS=Oryza sativa subsp. indica OX=39946 GN=OsI_14861 PE=3 SV=1; tr|A0A2P6Q4N9|A0A2P6Q4N9_ROSCH Putative actinidain OS=Rosa chinensis OX=74649 GN=RchiO…	CYSTEINE PROTEASE FAMILY C1-RELATED; Cysteine proteinases; FvH4_3g08030.t1_v4.0.a2; Inhibitor_I29; MHC class II antigen presentation; Papain-like_cys_pep_sf; Prot_inhib_I29;	NA	NA
IR_4193	-3.89641	1.93133e-05	Fvb4:2454860-2455067	Fvb4	2446593	2453920	FvH4_4g02690	-	940	Upstream TSS	3.44447	5.56115e-13	AT5G43630.4 | zinc knuckle (CCHC-type) family protein | Chr5:17527261-17530207 FORWARD LENGTH=831 | 201606; PREDICTED: uncharacterized protein LOC101293145 isoform X2 [Fragaria vesca subsp. vesca]; tr|A0A2P6QQ99|A0A2P6QQ99_ROSCH Putative transcription factor interactor and regulator CCHC(Zn) family OS=Rosa chinensis OX=74649 GN=RchiOBHm_Chr4g0390511 PE=4 SV=1	disorder_prediction; DNA binding; E3 ubiquitin ligases ubiquitinate target proteins; Formation of RNA Pol II elongation complex; FvH4_4g02690.t1_v4.0.a2; FvH4_4g02690.t3_v4.0.a2; Plus-3; PLUS3; Plus-3_dom; Plus3-like; Plus3-like_sf; RNA Polymerase II Pre-transcription Events; RNA Polymerase II Transcription Elongation; UNCHARACTERIZED; ZINC KNUCKLE (CCHC-TYPE) FAMILY PROTEIN	DNA binding	GO:0003677
IR_4193	-3.89641	1.93133e-05	Fvb4:2454860-2455067	Fvb4	2457778	2458595	FvH4_4g02691	-	2712	Downstream TTS	-0.851082	0.818061	NA	FvH4_4g02691.t1_v4.0.a2	NA	NA
IR_6702	-3.82184	0.0235162	Fvb5:28527133-28527526	Fvb5	28523959	28525889	FvH4_5g38590	-	1244	Upstream TSS	-1.94304	0.00117077	tr|A0A2P6PHZ4|A0A2P6PHZ4_ROSCH GrpE protein homolog OS=Rosa chinensis OX=74649 GN=RchiOBHm_Chr7g0240521 PE=3 SV=1; uncharacterized protein LOC112175333 [Rosa chinensis] &gt;gi|1358147076|gb|PRQ21556.1| putative GrpE nucleotide exchange factor [Rosa chinensis]	FvH4_5g38590.t1_v4.0.a2	NA	NA
IR_9396	-3.78533	0.021145	Fvb7:22030942-22031280	Fvb7	22033258	22034699	FvH4_7g30122	-	1979	Downstream TTS	-0.668241	0.275045	AT1G01590.1 | ferric reduction oxidase 1 | Chr1:214229-217304 FORWARD LENGTH=704 | 201606; PREDICTED: ferric reduction oxidase 4-like isoform X1 [Fragaria vesca subsp. vesca]; sp|Q9FLW2|FRO5_ARATH Ferric reduction oxidase 5 OS=Arabidopsis thaliana OX=3702 GN=FRO5 PE=2 SV=1; tr|A0A2P6SN91|A0A2P6SN91_ROSCH Putative ferric-chelate reductase (NADH) OS=Rosa chinensis OX=74649 GN=RchiOBHm_Chr1g0378151 …	disorder_prediction; FERRIC REDUCTION OXIDASE 4; FvH4_7g30122.t1_v4.0.a2; NADPH OXIDASE	NA	NA
IR_6786	-3.75179	0.00485815	Fvb6:2103589-2104278	Fvb6	2101665	2102614	FvH4_6g03893	-	975	Upstream TSS	NA	NA	NA	FvH4_6g03893.t1_v4.0.a2	NA	NA
IR_6786	-3.75179	0.00485815	Fvb6:2103589-2104278	Fvb6	2106475	2107710	FvH4_6g03894	-	2198	Downstream TTS	NA	NA	NA	Acid proteases; FvH4_6g03894.t1_v4.0.a2; Peptidase_aspartic_dom_sf	NA	NA
IR_2159	-3.71418	0.0342435	Fvb2:23455268-23455559	Fvb2	23453299	23453825	FvH4_2g30320	-	1443	Upstream TSS	NA	NA	AT1G66370.1 | myb domain protein 113 | Chr1:24753634-24754604 FORWARD LENGTH=246 | 201606; putative transcription factor MYB-HB-like family [Rosa chinensis]; sp|Q9FNV9|MY113_ARATH Transcription factor MYB113 OS=Arabidopsis thaliana OX=3702 GN=MYB113 PE=1 SV=1; tr|A0A2P6QWN1|A0A2P6QWN1_ROSCH Putative transcription factor MYB-HB-like family OS=Rosa chinensis OX=74649 GN=RchiOBHm_Chr4g0415831 PE=4 S…	DNA binding; FvH4_2g30320.t1_v4.0.a2; Homeobox-like_sf; Homeodomain-like; Myb_DNA-bind_6; MYB-LIKE DNA-BINDING PROTEIN MYB; Myb-like_TF; TRANSCRIPTION FACTOR MYB113-RELATED	DNA binding	GO:0003677
IR_4476	-3.70518	0.00240064	Fvb4:8308819-8309243	Fvb4	8311145	8314101	FvH4_4g08370	-	1903	Downstream TTS	-8.86965	1.66516e-08	AT5G05570.2 | transducin family protein / WD-40 repeat family protein | Chr5:1656766-1663728 FORWARD LENGTH=1099 | 201606; PREDICTED: uncharacterized protein LOC105350951 [Fragaria vesca subsp. vesca] &gt;gi|764568401|ref|XP_011462323.1| PREDICTED: uncharacterized protein LOC105350951 [Fragaria vesca subsp. vesca] &gt;gi|764568405|ref|XP_011462324.1| PREDICTED: uncharacterized protein LOC10535095…	FvH4_4g08370.t1_v4.0.a2; FvH4_4g08370.t3_v4.0.a2; FvH4_4g08370.t5_v4.0.a2; LETHAL 2 GIANT LARVAE PROTEIN;	NA	NA
IR_4815	-3.70391	0.000550204	Fvb4:18531992-18532365	Fvb4	18530144	18530938	FvH4_4g14930	-	1054	Upstream TSS	NA	NA	AT2G20980.1 | minichromosome maintenance 10 | Chr2:9011654-9013856 REVERSE LENGTH=396 | 201606; PREDICTED: protein MCM10 homolog [Fragaria vesca subsp. vesca]; sp|Q0VBD2|MCM10_MOUSE Protein MCM10 homolog OS=Mus musculus OX=10090 GN=Mcm10 PE=1 SV=1; tr|A0A2P6PKY0|A0A2P6PKY0_ROSCH Putative Zinc finger, Mcm10/DnaG-type OS=Rosa chinensis OX=74649 GN=RchiOBHm_Chr6g0251921 PE=4 SV=1	Activation of ATR in response to replication stress; Activation of the pre-replicative complex; DNA replication initiation; double-stranded DNA binding; FAMILY NOT NAMED; FvH4_4g14930.t1_v4.0.a2; Mcm10; single-stranded DNA binding	DNA replication initiation; double-stranded DNA binding; single-stranded DNA binding	GO:0003690; GO:0003697; GO:0006270
IR_8827	-3.67222	4.79424e-06	Fvb7:6607179-6607638	Fvb7	6603027	6605749	FvH4_7g06620	-	1430	Upstream TSS	NA	NA	PREDICTED: kinesin-related protein 4-like [Fragaria vesca subsp. vesca]	Coil; FvH4_7g06620.t1_v4.0.a2	NA	NA
IR_1910	-3.60827	0.0368765	Fvb2:16678365-16678699	Fvb2	16680723	16681363	FvH4_2g19740	+	2025	Upstream TSS	NA	NA	AT4G29037.1 | plant self-incompatibility protein S1 family protein | Chr4:14311498-14312128 FORWARD LENGTH=166 | 201606; sp|Q40975|S1_PAPRH Self-incompatibility protein S1 OS=Papaver rhoeas OX=33128 GN=S1 PE=1 SV=1; tr|A0A061DMI7|A0A061DMI7_THECC Uncharacterized protein OS=Theobroma cacao OX=3641 GN=TCM_003121 PE=4 SV=1; Uncharacterized protein TCM_003121 [Theobroma cacao]	FAMILY NOT NAMED; FvH4_2g19740.t1_v4.0.a2; Self-incomp_S1	NA	NA
IR_6736	-3.5496	0.0282839	Fvb6:35571-35957	Fvb6	25083	34343	FvH4_6g00030	-	1228	Upstream TSS	0.754571	0.0192762	AT1G65580.1 | Endonuclease/exonuclease/phosphatase family protein | Chr1:24377598-24383940 REVERSE LENGTH=1101 | 201606; PREDICTED: type II inositol 1,4,5-trisphosphate 5-phosphatase FRA3 [Fragaria vesca subsp. vesca]; sp|Q84W55|IP5PF_ARATH Type II inositol polyphosphate 5-phosphatase 15 OS=Arabidopsis thaliana OX=3702 GN=IP5P15 PE=1 SV=2; tr|A0A2P6R4X0|A0A2P6R4X0_ROSCH Putative phosphoinositide …	disorder_prediction; DNase I-like; Endo/exonuclease/phosphatase; Endo/exonu/phosph_ase_sf; Exo_endo_phos; FvH4_6g00030.t1_v4.0.a2; INOSITOL 5-PHOSPHATASE; INPP5c; protein binding; TYPE I INOSITOL POLYPHOSPHATE 5-PHOSPHATASE 12; WD40_repeat_dom_sf; WD40 repeat-like	protein binding	GO:0005515
IR_3682	-3.54162	0.0233725	Fvb3:29727356-29727761	Fvb3	29729955	29733169	FvH4_3g34260	-	2195	Downstream TTS	NA	NA	AT5G41460.1 | transferring glycosyl group transferase (DUF604) | Chr5:16589724-16592197 REVERSE LENGTH=524 | 201606; PREDICTED: uncharacterized protein LOC101307385 [Fragaria vesca subsp. vesca]; tr|A0A2P6QI03|A0A2P6QI03_ROSCH Putative N-acetylgalactosaminide beta-1,3-galactosyltransferase OS=Rosa chinensis OX=74649 GN=RchiOBHm_Chr5g0061811 PE=4 SV=1	DUF604; FRINGE-RELATED; FvH4_3g34260.t1_v4.0.a2; GLYCOSYLTRANSFERASE	NA	NA
IR_5084	-3.50085	0.0108949	Fvb4:23713196-23713654	Fvb4	23710790	23711303	FvH4_4g20440	-	1893	Upstream TSS	NA	NA	AT1G47960.2 | cell wall / vacuolar inhibitor of fructosidase 1 | Chr1:17682425-17683516 REVERSE LENGTH=166 | 201606; PREDICTED: cell wall / vacuolar inhibitor of fructosidase 1 [Fragaria vesca subsp. vesca]; sp|F4HWQ8|CVIF1_ARATH Cell wall / vacuolar inhibitor of fructosidase 1 OS=Arabidopsis thaliana OX=3702 GN=C/VIF1 PE=1 SV=1; tr|A0A2I4GTK9|A0A2I4GTK9_JUGRE cell wall / vacuolar inhibitor of fr…	CELL WALL / VACUOLAR INHIBITOR OF FRUCTOSIDASE 1; CIF_like; C/VIF1; enzyme inhibitor activity; FAMILY NOT NAMED; FvH4_4g20440.t1_v4.0.a2; Invertase/methylesterase_inhib; negative regulation of catalytic activity; Pectinesterase_inhib_dom; Plant invertase/pectin methylesterase inhibitor; PMEI; TIGR01614	enzyme inhibitor activity; negative regulation of catalytic activity	GO:0004857; GO:0043086
IR_5084	-3.50085	0.0108949	Fvb4:23713196-23713654	Fvb4	23712331	23712595	FvH4_4g20450	-	601	Upstream TSS	-0.229265	0.813872	AT5G49525.1 | transmembrane protein | Chr5:20097132-20097374 REVERSE LENGTH=80 | 201606; PREDICTED: uncharacterized protein LOC105350667 [Fragaria vesca subsp. vesca]; tr|A0A2P6QZA9|A0A2P6QZA9_ROSCH Uncharacterized protein OS=Rosa chinensis OX=74649 GN=RchiOBHm_Chr4g0425921 PE=4 SV=1	FAMILY NOT NAMED; FvH4_4g20450.t1_v4.0.a2;	NA	NA
IR_5084	-3.50085	0.0108949	Fvb4:23713196-23713654	Fvb4	23714914	23718358	FvH4_4g20460	+	1261	Upstream TSS	0.0879482	0.927682	AT1G47970.1 | nucleolin | Chr1:17687342-17688562 FORWARD LENGTH=198 | 201606; PREDICTED: prostatic spermine-binding protein-like [Fragaria vesca subsp. vesca]; tr|A0A1S4APY6|A0A1S4APY6_TOBAC prostatic spermine-binding protein-like OS=Nicotiana tabacum OX=4097 GN=LOC107800018 PE=4 SV=1	disorder_prediction; FAMILY NOT NAMED; FvH4_4g20460.t1_v4.0.a2	NA	NA
IR_1815	-3.49841	0.00362991	Fvb2:15258390-15258726	Fvb2	15255648	15257159	FvH4_2g17770	+	1231	Downstream TTS	NA	NA	NA	FvH4_2g17770.t1_v4.0.a2	NA	NA
IR_1815	-3.49841	0.00362991	Fvb2:15258390-15258726	Fvb2	15259879	15265082	FvH4_2g17780	-	1154	Downstream TTS	5.80826	5.03397e-22	AT5G48460.1 | Actin binding Calponin homology (CH) domain-containing protein | Chr5:19636225-19639365 REVERSE LENGTH=654 | 201606; PREDICTED: fimbrin-2 [Fragaria vesca subsp. vesca]; sp|O50064|FIMB2_ARATH Fimbrin-2 OS=Arabidopsis thaliana OX=3702 GN=FIM2 PE=2 SV=1; tr|A0A2P6PTY1|A0A2P6PTY1_ROSCH Putative calponin domain-containing protein OS=Rosa chinensis OX=74649 GN=RchiOBHm_Chr6g0282801 PE=4 S…	actin filament binding; actin filament bundle assembly; Calponin-homology domain, CH-domain; CH; CH-domain; CH_dom_sf; Coil; disorder_prediction; Fimbrin/Plastin; FIMBRIN/PLASTIN; FvH4_2g17780.t1_v4.0.a2; protein binding;	actin filament binding; actin filament bundle assembly; protein binding	GO:0005515; GO:0051015; GO:0051017
IR_2180	-3.48168	0.0356928	Fvb2:23745294-23745837	Fvb2	23747665	23748799	FvH4_2g30760	+	1829	Upstream TSS	1.07329	0.773591	AT3G12660.1 | FASCICLIN-like arabinogalactan protein 14 precursor | Chr3:4019060-4019827 FORWARD LENGTH=255 | 201606; PREDICTED: fasciclin-like arabinogalactan protein 14 [Fragaria vesca subsp. vesca]; sp|Q9LTW9|FLA14_ARATH Fasciclin-like arabinogalactan protein 14 OS=Arabidopsis thaliana OX=3702 GN=FLA14 PE=2 SV=1; tr|A0A2P6Q1N4|A0A2P6Q1N4_ROSCH Putative fasciclin-like arabinogalactan protein OS…	disorder_prediction; FAMILY NOT NAMED; FAS1; FAS1 domain; FAS1_domain; FAS1_dom_sf; Fasciclin; FASCICLIN-LIKE ARABINOGALACTAN PROTEIN 5; FvH4_2g30760.t1_v4.0.a2; Plant_FLA	NA	NA
IR_2180	-3.48168	0.0356928	Fvb2:23745294-23745837	Fvb2	23744383	23744815	FvH4_2g30750	+	479	Downstream TTS	NA	NA	fasciclin-like arabinogalactan protein 14 [Rosa chinensis]; tr|A0A2P6Q1N4|A0A2P6Q1N4_ROSCH Putative fasciclin-like arabinogalactan protein OS=Rosa chinensis OX=74649 GN=RchiOBHm_Chr6g0312141 PE=4 SV=1	disorder_prediction; FAMILY NOT NAMED; FASCICLIN-LIKE ARABINOGALACTAN PROTEIN 5; FvH4_2g30750.t1_v4.0.a2; Plant_FLA	NA	NA
IR_4964	-3.46141	4.17993e-05	Fvb4:21740358-21740756	Fvb4	21738999	21739766	FvH4_4g17750	-	592	Upstream TSS	NA	NA	AT2G47810.1 | nuclear factor Y%2C subunit B5 | Chr2:19582938-19583420 REVERSE LENGTH=160 | 201606; PREDICTED: nuclear transcription factor Y subunit B-4-like [Fragaria vesca subsp. vesca]; sp|O82248|NFYB5_ARATH Nuclear transcription factor Y subunit B-5 OS=Arabidopsis thaliana OX=3702 GN=NFYB5 PE=1 SV=1; tr|A0A2P6QY85|A0A2P6QY85_ROSCH Putative transcription factor Hap3/NF-YB family OS=Rosa chinen…	Activation of gene expression by SREBF (SREBP); ATF4 activates genes in response to endoplasmic reticulum stress; ATF6 (ATF6-alpha) activates chaperone genes; CBFA_NFYB_domain; CBFD_NFYB_HMF; CCAAT-BINDING TRANSCRIPTION FACTOR-RELATED; CCAATSUBUNTA; disorder_prediction; FOXO-mediated transcription of cell death genes; FvH4_4g17750.t1_v4.0.a2; Histone-fold; NFYB_HAP3; nucleus; PPARA activates gene…	nucleus; protein heterodimerization activity; regulation of DNA-templated transcription; sequence-specific DNA binding	GO:0005634; GO:0006355; GO:0043565; GO:0046982
IR_5867	-3.4117	0.0350556	Fvb5:10807127-10807516	Fvb5	10801189	10806138	FvH4_5g18820	+	989	Downstream TTS	1.13771	0.0824508	AT4G16570.1 | protein arginine methyltransferase 7 | Chr4:9336815-9340692 FORWARD LENGTH=724 | 201606; PREDICTED: protein arginine N-methyltransferase 7 [Fragaria vesca subsp. vesca]; sp|Q944R7|ANM16_ARATH Protein arginine N-methyltransferase 1.6 OS=Arabidopsis thaliana OX=3702 GN=PRMT16 PE=2 SV=2; tr|A0A2P6P8C8|A0A2P6P8C8_ROSCH Protein arginine N-methyltransferase OS=Rosa chinensis OX=74649 GN=R…	Arg_MeTrfase; Arg_N-mtase; Coil; FvH4_5g18820.t1_v4.0.a2; methyltransferase activity; MeTrfase_PRMT7; PrmA; PROTEIN ARGININE N-METHYLTRANSFERASE; PROTEIN ARGININE N-METHYLTRANSFERASE 7; protein methylation; RMTs methylate histone arginines; S-adenosyl-L-methionine-dependent methyltransferases; SAM-dependent_MTases; SAM_MT_PRMT	methyltransferase activity; protein methylation	GO:0006479; GO:0008168
IR_5867	-3.4117	0.0350556	Fvb5:10807127-10807516	Fvb5	10809496	10817464	FvH4_5g18830	-	1981	Downstream TTS	-0.0550092	0.904564	AT2G35720.1 | DNAJ heat shock N-terminal domain-containing protein | Chr2:15016883-15019866 FORWARD LENGTH=538 | 201606; PREDICTED: chaperone protein dnaJ 13 [Fragaria vesca subsp. vesca]; sp|Q39079|DNJ13_ARATH Chaperone protein dnaJ 13 OS=Arabidopsis thaliana OX=3702 GN=ATJ13 PE=1 SV=2; tr|A0A2P6P8D9|A0A2P6P8D9_ROSCH Putative dnaJ-like protein C11 OS=Rosa chinensis OX=74649 GN=RchiOBHm_Chr7g0203…	AtJ13; Chaperone J-domain; Coil; Cristae formation; DnaJ; DNAJ_1; DNAJ_2; DnaJ_domain; DnaJ_domain_CS; DnaJ-like_C11_C; DUF3395; FAMILY NOT NAMED; FvH4_5g18830.t1_v4.0.a2; JDOMAIN; J_dom_sf	NA	NA
IR_1182	-3.37347	0.0063532	Fvb2:3295956-3296158	Fvb2	3291788	3293198	FvH4_2g04210	+	2758	Downstream TTS	NA	NA	AT4G33880.1 | ROOT HAIR DEFECTIVE 6-LIKE 2 | Chr4:16239566-16241052 REVERSE LENGTH=352 | 201606; PREDICTED: transcription factor bHLH54-like [Fragaria vesca subsp. vesca]; sp|Q84WK0|BH085_ARATH Transcription factor bHLH85 OS=Arabidopsis thaliana OX=3702 GN=BHLH85 PE=2 SV=1; tr|M5VJX7|M5VJX7_PRUPE Uncharacterized protein OS=Prunus persica OX=3760 GN=PRUPE_ppa015724mg PE=4 SV=1	BHLH; bHLH_dom; disorder_prediction; FAMILY NOT NAMED; FvH4_2g04210.t1_v4.0.a2; HLH; HLH_DNA-bd_sf; HLH, helix-loop-helix DNA-binding domain; protein dimerization activity; TRANSCRIPTION FACTOR BHLH85	protein dimerization activity	GO:0046983
IR_6071	-3.37342	0.00393173	Fvb5:15250949-15251368	Fvb5	15254307	15258330	FvH4_5g23970	-	2940	Downstream TTS	0.394646	0.495177	AT1G08400.1 | RINT-1 / TIP-1 family | Chr1:2643348-2646005 REVERSE LENGTH=804 | 201606; PREDICTED: RINT1-like protein MAG2L [Fragaria vesca subsp. vesca]; sp|Q8GXP1|MAG2L_ARATH RINT1-like protein MAG2L OS=Arabidopsis thaliana OX=3702 GN=MAG2L PE=2 SV=1; tr|A0A2P6PB03|A0A2P6PB03_ROSCH Uncharacterized protein OS=Rosa chinensis OX=74649 GN=RchiOBHm_Chr7g0213411 PE=4 SV=1	COPI-dependent Golgi-to-ER retrograde traffic; endoplasmic reticulum; FvH4_5g23970.t1_v4.0.a2; Golgi vesicle transport; RAD50-INTERACTING PROTEIN 1 RINT-1; RINT1-LIKE PROTEIN MAG2; RINT1_TIP1; RINT1_Tip20; RINT1_TIP20	endoplasmic reticulum; Golgi vesicle transport	GO:0005783; GO:0048193
IR_2076	-3.30856	0.0171509	Fvb2:21336379-21336699	Fvb2	21337638	21338177	FvH4_2g26601	+	940	Upstream TSS	NA	NA	AT5G45050.2 | Disease resistance protein (TIR-NBS-LRR class) | Chr5:18177016-18181805 REVERSE LENGTH=1344 | 201606; putative TIR domain, winged helix-turn-helix DNA-binding domain-containing protein [Rosa chinensis]; sp|Q9FL92|RRS1B_ARATH Disease resistance protein RRS1B OS=Arabidopsis thaliana OX=3702 GN=RRS1B PE=1 SV=1; tr|A0A2P6PXC4|A0A2P6PXC4_ROSCH Putative TIR domain, winged helix-turn-helix…	DISEASE RESISTANCE PROTEIN (TIR-NBS-LRR CLASS); FvH4_2g26601.t1_v4.0.a2; LEUCINE-RICH REPEAT-CONTAINING PROTEIN; &quot;Winged helix&quot; DNA-binding domain; WH_DNA-bd_sf	NA	NA
IR_1676	-3.28946	0.028264	Fvb2:12658976-12659261	Fvb2	12657531	12658894	FvH4_2g14390	+	82	Downstream TTS	8.48126	1.08165e-05	AT1G21340.1 | Dof-type zinc finger DNA-binding family protein | Chr1:7476087-7476869 FORWARD LENGTH=260 | 201606; PREDICTED: dof zinc finger protein DOF1.2 [Fragaria vesca subsp. vesca]; sp|P68349|DOF12_ARATH Dof zinc finger protein DOF1.2 OS=Arabidopsis thaliana OX=3702 GN=DOF1.2 PE=2 SV=1; tr|A0A1D6WJM1|A0A1D6WJM1_FRAAN ZnF-Dof-type transcription factor OS=Fragaria ananassa OX=3747 GN=Dof1 PE=2…	disorder_prediction; DNA binding; FAMILY NOT NAMED; FvH4_2g14390.t1_v4.0.a2; regulation of transcription, DNA-templated; ; zf-Dof; ZF_DOF_1; ZF_DOF_2; Znf_Dof	DNA binding; regulation of DNA-templated transcription	GO:0003677; GO:0006355
IR_9305	-3.25522	0.00437547	Fvb7:18700537-18701172	Fvb7	18695334	18698336	FvH4_7g24180	+	2201	Downstream TTS	-0.617128	0.343087	AT5G05760.1 | syntaxin of plants 31 | Chr5:1729111-1730903 REVERSE LENGTH=336 | 201606; PREDICTED: syntaxin-31 [Fragaria vesca subsp. vesca]; sp|Q9FFK1|SYP31_ARATH Syntaxin-31 OS=Arabidopsis thaliana OX=3702 GN=SYP31 PE=1 SV=1; tr|A0A2P6SL57|A0A2P6SL57_ROSCH Putative syntaxin-5, Sly1p-binding domain-containing protein OS=Rosa chinensis OX=74649 GN=RchiOBHm_Chr1g0369761 PE=3 SV=1	Cargo concentration in the ER; COPII-mediated vesicle transport; COPI-mediated anterograde transport; disorder_prediction; FvH4_7g24180.t1_v4.0.a2; Insertion of tail-anchored proteins into the endoplasmic reticulum membrane; intracellular protein transport; Intra-Golgi traffic; membrane; SNAP receptor activity; SNARE; SNARE_syntaxin5; SYNTAXIN; SYNTAXIN-31; Syntaxin-5_N; Syntaxin/epimorphin_CS; T…	intracellular protein transport; membrane; SNAP receptor activity; vesicle-mediated transport	GO:0005484; GO:0006886; GO:0016020; GO:0016192
IR_9305	-3.25522	0.00437547	Fvb7:18700537-18701172	Fvb7	18698621	18700475	FvH4_7g24190	+	62	Downstream TTS	NA	NA	AT5G54010.1 | UDP-Glycosyltransferase superfamily protein | Chr5:21919819-21921180 REVERSE LENGTH=453 | 201606; PREDICTED: anthocyanidin 3-O-glucoside 2''-O-glucosyltransferase-like [Fragaria vesca subsp. vesca]; sp|I1KEV6|FG3H_SOYBN UDP-glycosyltransferase 79B30 OS=Glycine max OX=3847 GN=FG3 PE=1 SV=2; tr|A0A2P6Q4D9|A0A2P6Q4D9_ROSCH Glycosyltransferase OS=Rosa chinensis OX=74649 GN=RchiOBHm_Chr5…	FvH4_7g24190.t1_v4.0.a2; GLUCOSYL/GLUCURONOSYL TRANSFERASES; Glucuronidation; transferase activity, transferring hexosyl groups; UDP_glucos_trans; UDP_glycos_trans_CS; UDP-Glycosyltransferase/glycogen phosphorylase; UDPGT	hexosyltransferase activity	GO:0016758
IR_3894	-3.16529	0.029768	Fvb3:33687413-33687866	Fvb3	33683238	33686690	FvH4_3g39710	-	723	Upstream TSS	3.46791	7.5401e-05	AT1G07010.1 | Calcineurin-like metallo-phosphoesterase superfamily protein | Chr1:2152949-2154968 FORWARD LENGTH=389 | 201606; PREDICTED: uncharacterized protein At1g18480 isoform X1 [Fragaria vesca subsp. vesca]; sp|Q8L774|SLP1_ARATH Shewanella-like protein phosphatase 1 OS=Arabidopsis thaliana OX=3702 GN=SLP1 PE=1 SV=1; tr|A0A2P6QKF6|A0A2P6QKF6_ROSCH Uncharacterized protein OS=Rosa chinensis OX…	Calcineurin-like_PHP_ApaH; FAMILY NOT NAMED; FvH4_3g39710.t1_v4.0.a2; hydrolase activity; Metallo-dependent phosphatases; Metallophos; MPP_Shelphs; Ser/Thr-sp_prot-phosphatase; SHEWANELLA-LIKE PROTEIN PHOSPHATASE 1; STPHPHTASE; T cell receptor signaling pathway; Th1 and Th2 cell differentiation	hydrolase activity	GO:0016787
IR_3894	-3.16529	0.029768	Fvb3:33687413-33687866	Fvb3	33688174	33695252	FvH4_3g39711	-	309	Downstream TTS	-0.797108	0.572775	NA	FvH4_3g39711.t1_v4.0.a2	NA	NA
IR_1718	-3.12934	0.027265	Fvb2:13215902-13216144	Fvb2	13211303	13212979	FvH4_2g15041	-	2923	Upstream TSS	NA	NA	NA	FvH4_2g15041.t1_v4.0.a2	NA	NA
IR_1718	-3.12934	0.027265	Fvb2:13215902-13216144	Fvb2	13216895	13218958	FvH4_2g15050	+	752	Upstream TSS	9.91661	4.46531e-09	AT2G02850.1 | plantacyanin | Chr2:826630-827720 REVERSE LENGTH=129 | 201606; PREDICTED: basic blue protein [Fragaria vesca subsp. vesca]; sp|Q8LG89|BABL_ARATH Basic blue protein OS=Arabidopsis thaliana OX=3702 GN=ARPN PE=2 SV=2; tr|A0A2P4K153|A0A2P4K153_QUESU Basic blue protein OS=Quercus suber OX=58331 GN=CFP56_15457 PE=4 SV=1	BlueCu_1_BS; COPPER_BLUE; Cu_bind_like; Cupredoxin; Cupredoxins; electron transfer activity; FAMILY NOT NAMED; FvH4_2g15050.t1_v4.0.a2; FvH4_2g15050.t2_v4.0.a2; Phytocyanin; PHYTOCYANIN; Phytocyanin_dom; Plantacyanin;	electron transfer activity	GO:0009055
IR_2977	-3.07638	0.0171509	Fvb3:15342483-15342871	Fvb3	15344619	15347242	FvH4_3g22321	+	1749	Upstream TSS	-1.93947	0.00112167	AT1G32120.1 | serine/threonine-protein phosphatase 7 long form-like protein | Chr1:11552926-11555942 FORWARD LENGTH=978 | 201606; PREDICTED: uncharacterized protein LOC105350524 [Fragaria vesca subsp. vesca]; tr|A0A2P6QC30|A0A2P6QC30_ROSCH Uncharacterized protein OS=Rosa chinensis OX=74649 GN=RchiOBHm_Chr5g0038781 PE=4 SV=1	AminoTfrase-like_pln_mobile; AMINOTRANSFERASE-LIKE, PLANT MOBILE DOMAIN FAMILY PROTEIN; Coil; disorder_prediction; FAMILY NOT NAMED; FvH4_3g22321.t1_v4.0.a2; PMD	NA	NA
IR_2977	-3.07638	0.0171509	Fvb3:15342483-15342871	Fvb3	15339842	15340620	FvH4_3g22310	+	1863	Downstream TTS	NA	NA	NA	FvH4_3g22310.t1_v4.0.a2	NA	NA
IR_6661	-3.07206	0.0402362	Fvb5:27441413-27441895	Fvb5	27444161	27445466	FvH4_5g37330	+	2267	Upstream TSS	-1.09344	0.125394	AT1G78190.1 | Trm112p-like protein | Chr1:29418620-29418994 REVERSE LENGTH=124 | 201606; PREDICTED: multifunctional methyltransferase subunit TRM112-like protein At1g22270 [Fragaria vesca subsp. vesca]; sp|Q9C9R3|T112B_ARATH Multifunctional methyltransferase subunit TRM112 homolog B OS=Arabidopsis thaliana OX=3702 GN=TRM112B PE=1 SV=1; tr|A0A2P6PHL5|A0A2P6PHL5_ROSCH Uncharacterized protein OS=Ros…	Eukaryotic Translation Termination; FvH4_5g37330.t1_v4.0.a2; Methylation; MULTIFUNCTIONAL METHYLTRANSFERASE SUBUNIT TRM112 HOMOLOG B; protein heterodimerization activity; rRNA modification in the nucleus and cytosol; Trm112; Trm112-like; Trm112p; Trm112p-like; tRNA modification in the nucleus and cytosol; UPF0315 PROTEIN-RELATED	protein heterodimerization activity	GO:0046982
IR_5957	-3.02917	0.00712012	Fvb5:12516489-12516934	Fvb5	12503450	12514001	FvH4_5g20910	-	2488	Upstream TSS	2.1256	6.1956e-08	AT5G47040.1 | lon protease 2 | Chr5:19093356-19098678 REVERSE LENGTH=888 | 201606; PREDICTED: lon protease homolog 2, peroxisomal [Fragaria vesca subsp. vesca]; sp|O04979|LONP2_SPIOL Lon protease homolog 2, peroxisomal OS=Spinacia oleracea OX=3562 PE=2 SV=2; tr|A0A2P6P9K3|A0A2P6P9K3_ROSCH Lon protease homolog 2, peroxisomal OS=Rosa chinensis OX=74649 GN=RchiOBHm_Chr7g0207901 PE=3 SV=1	AAA; Association of TriC/CCT with target proteins during biosynthesis; ATPase_AAA_core; ATP binding; ATP DEPENDENT LON PROTEASE FAMILY MEMBER; ATP-dependent peptidase activity; Coil; disorder_prediction; ENDOLAPTASE; FvH4_5g20910.t1_v4.0.a2; Lon_bac/euk-typ; Lon_C; LON_N; lonp2_euk; Lonp2_euk; Lon_proteas; Lon_proteolytic; LON_PROTEOLYTIC; Lon_Prtase; LON_SER; Lon_substr-bd; LON_substr_bdg; Pepti…	ATP binding; ATP-dependent peptidase activity; protein catabolic process; protein quality control for misfolded or incompletely synthesized proteins; proteolysis; serine-type endopeptidase activity	GO:0004176; GO:0004252; GO:0005524; GO:0006508; GO:0006515; GO:0030163
IR_5926	-2.97585	0.0267157	Fvb5:11857240-11857654	Fvb5	11854268	11855510	FvH4_5g20100	-	1730	Upstream TSS	NA	NA	AT2G22740.2 | SU(VAR)3-9 homolog 6 | Chr2:9664256-9666628 REVERSE LENGTH=790 | 201606; PREDICTED: YDG domain-containing protein At5g47150-like [Fragaria vesca subsp. vesca] &gt;gi|764591237|ref|XP_011465235.1| PREDICTED: YDG domain-containing protein At5g47150-like [Fragaria vesca subsp. vesca] &gt;gi|764591243|ref|XP_011465236.1| PREDICTED: YDG domain-containing protein At5g47150-like [Fragaria …	disorder_prediction; FAMILY NOT NAMED; FvH4_5g20100.t1_v4.0.a2; HISTONE-LYSINE N-METHYLTRANSFERASE, H3 LYSINE-9 SPECIFIC SUVH5-RELATED; PUA domain-like; PUA-like_sf; SAD_SRA; SRA_YDG; SRA-YDG_sf; YDG	NA	NA
IR_2166	-2.91045	6.83913e-05	Fvb2:23488634-23489054	Fvb2	23467351	23488463	FvH4_2g30330	-	171	Upstream TSS	0.71613	0.131531	AT2G25730.3 | zinc finger FYVE domain protein | Chr2:10956751-10972729 REVERSE LENGTH=2487 | 201606; PREDICTED: uncharacterized protein LOC101291736 isoform X1 [Fragaria vesca subsp. vesca]; sp|Q551A3|Y6689_DICDI Protein DDB_G0276689 OS=Dictyostelium discoideum OX=44689 GN=DDB_G0276689 PE=4 SV=2; tr|A0A2P6Q1P8|A0A2P6Q1P8_ROSCH Uncharacterized protein OS=Rosa chinensis OX=74649 GN=RchiOBHm_Chr6g03…	Coil; disorder_prediction; FAMILY NOT NAMED; FvH4_2g30330.t1_v4.0.a2; protein binding; TPR; TPR_repeat	protein binding	GO:0005515
IR_2492	-2.88154	0.00522063	Fvb3:4734387-4734853	Fvb3	4732004	4732668	FvH4_3g08020	-	1719	Upstream TSS	-0.39184	0.863148	AT5G47550.1 | Cystatin/monellin superfamily protein | Chr5:19286596-19286964 REVERSE LENGTH=122 | 201606; PREDICTED: cysteine proteinase inhibitor 1-like [Fragaria vesca subsp. vesca]; sp|Q10J94|CYT8_ORYSJ Cysteine proteinase inhibitor 8 OS=Oryza sativa subsp. japonica OX=39947 GN=Os03g0429000 PE=2 SV=1; tr|A0A2P6Q4J8|A0A2P6Q4J8_ROSCH Cysteine proteinase inhibitor OS=Rosa chinensis OX=74649 GN=Rc…	CY; Cystatin_dom; Cystatin/monellin; cysteine-type endopeptidase inhibitor activity; FAMILY NOT NAMED; FvH4_3g08020.t1_v4.0.a2; SQAPI	cysteine-type endopeptidase inhibitor activity	GO:0004869
IR_7788	-2.83887	0.0345663	Fvb6:22115225-22115667	Fvb6	22116256	22123581	FvH4_6g28670	+	590	Upstream TSS	-1.95939	4.20183e-05	AT1G15960.1 | NRAMP metal ion transporter 6 | Chr1:5482202-5485066 REVERSE LENGTH=527 | 201606; metal transporter Nramp6 isoform X1 [Rosa chinensis] &gt;gi|1365972475|ref|XP_024185382.1| metal transporter Nramp6 isoform X1 [Rosa chinensis] &gt;gi|1365972477|ref|XP_024185383.1| metal transporter Nramp6 isoform X1 [Rosa chinensis] &gt;gi|1358175953|gb|PRQ50428.1| putative NRAMP family protein [Rosa…	FvH4_6g28670.t1_v4.0.a2; FvH4_6g28670.t2_v4.0.a2; membrane; Metal ion SLC transporters; metal ion transmembrane transporter activity; metal ion transport; METAL TRANSPORTER NRAMP6; NATRESASSCMP; Nramp; NRAMP; NRAMP_fam; SOLUTE CARRIER PROTEIN FAMILY 11 MEMBER; TIGR01197	membrane; metal ion transmembrane transporter activity; metal ion transport	GO:0016020; GO:0030001; GO:0046873
IR_1608	-2.83164	0.0112413	Fvb2:12032799-12033077	Fvb2	12028159	12031110	FvH4_2g13810	-	1689	Upstream TSS	1.86166	4.37435e-05	AT1G43650.1 | nodulin MtN21 /EamA-like transporter family protein | Chr1:16443861-16446814 REVERSE LENGTH=343 | 201606; PREDICTED: WAT1-related protein At1g43650 [Fragaria vesca subsp. vesca]; sp|Q6NMB7|WTR7_ARATH WAT1-related protein At1g43650 OS=Arabidopsis thaliana OX=3702 GN=At1g43650 PE=2 SV=1; tr|A0A2P6PS21|A0A2P6PS21_ROSCH WAT1-related protein OS=Rosa chinensis OX=74649 GN=RchiOBHm_Chr6g02…	EamA; EamA_dom; FAMILY NOT NAMED; FvH4_2g13810.t1_v4.0.a2; integral component of membrane; membrane; Multidrug resistance efflux transporter EmrE; ; transmembrane transporter activity; WAT1-related	integral to membrane; membrane; transmembrane transporter activity	GO:0016020; GO:0016021; GO:0022857
IR_8173	-2.79968	0.0263156	Fvb6:29564942-29565290	Fvb6	29567050	29574209	FvH4_6g37550	+	1761	Upstream TSS	4.31626	1.72618e-09	AT1G07650.1 | Leucine-rich repeat transmembrane protein kinase | Chr1:2359817-2366423 REVERSE LENGTH=1014 | 201606; PREDICTED: probable LRR receptor-like serine/threonine-protein kinase At1g07650 isoform X1 [Fragaria vesca subsp. vesca]; sp|C0LGE0|Y1765_ARATH Probable LRR receptor-like serine/threonine-protein kinase At1g07650 OS=Arabidopsis thaliana OX=3702 GN=At1g07650 PE=1 SV=1; tr|A0A2P6RZW7|…	ATP binding; Coil; FAMILY NOT NAMED; FvH4_6g37550.t1_v4.0.a2; Kinase-like_dom_sf; L domain-like; Leu-rich_rpt; LRR_8; LRR_dom_sf; Malectin; Malectin_dom; Neutrophil degranulation; N-glycan trimming in the ER and Calnexin/Calreticulin cycle; Pkinase_Tyr; protein binding; protein kinase activity; PROTEIN_KINASE_ATP; Protein_kinase_ATP_BS; PROTEIN_KINASE_DOM; Protein kinase-like (PK-like); PROTEIN_K…	ATP binding; protein binding; protein kinase activity; protein phosphorylation	GO:0004672; GO:0005515; GO:0005524; GO:0006468
IR_271	-2.65947	0.0233725	Fvb1:8347788-8348312	Fvb1	8350716	8355108	FvH4_1g14901	+	2405	Upstream TSS	1.75261	0.523618	methylesterase 4-like [Rosa chinensis]; tr|A0A2P6SB51|A0A2P6SB51_ROSCH Putative 3-oxolaurate decarboxylase OS=Rosa chinensis OX=74649 GN=RchiOBHm_Chr1g0329921 PE=4 SV=1	FvH4_1g14901.t1_v4.0.a2	NA	NA
IR_450	-2.6418	0.0128953	Fvb1:12341722-12342093	Fvb1	12343668	12344946	FvH4_1g20130	+	1576	Upstream TSS	-5.44732	0.000360473	AT5G65340.1 | MIZU-KUSSEI-like protein (Protein of unknown function%2C DUF617) | Chr5:26113684-26114445 REVERSE LENGTH=253 | 201606; PREDICTED: protein MIZU-KUSSEI 1-like [Fragaria vesca subsp. vesca]; sp|O22227|MIZ1_ARATH Protein MIZU-KUSSEI 1 OS=Arabidopsis thaliana OX=3702 GN=MIZ1 PE=1 SV=1; tr|A0A2P6RQ51|A0A2P6RQ51_ROSCH Uncharacterized protein OS=Rosa chinensis OX=74649 GN=RchiOBHm_Chr2g0112…	DUF617; FAMILY NOT NAMED; FvH4_1g20130.t1_v4.0.a2; hydrotropism; MIZ1-like_pln; ; TIGR01570	hydrotropism	GO:0010274
IR_8499	-2.6393	0.00162044	Fvb6:37841256-37841670	Fvb6	37837791	37841234	FvH4_6g50950	+	22	Downstream TTS	1.05541	0.0244094	AT5G14660.3 | peptide deformylase 1B | Chr5:4727129-4728671 REVERSE LENGTH=273 | 201606; PREDICTED: peptide deformylase 1B, chloroplastic/mitochondrial [Fragaria vesca subsp. vesca] &gt;gi|764618693|ref|XP_011468274.1| PREDICTED: peptide deformylase 1B, chloroplastic/mitochondrial [Fragaria vesca subsp. vesca]; sp|Q9FUZ2|DEF1B_ARATH Peptide deformylase 1B, chloroplastic/mitochondrial OS=Arabidops…	Coil; FvH4_6g50950.t1_v4.0.a2; FvH4_6g50950.t2_v4.0.a2; FvH4_6g50950.t3_v4.0.a2; PDEFORMYLASE; Pep_deformylase; Peptide deformylase; Peptide_deformylase; PEPTIDE DEFORMYLASE; Peptide_deformylase_sf; TIGR00079	NA	NA
IR_2827	-2.62673	0.0204324	Fvb3:12089046-12089483	Fvb3	12091583	12095505	FvH4_3g18830	+	2101	Upstream TSS	NA	NA	AT5G27100.1 | glutamate receptor 2.1 | Chr5:9535160-9538311 REVERSE LENGTH=901 | 201606; PREDICTED: glutamate receptor 2.8-like [Fragaria vesca subsp. vesca]; sp|O04660|GLR21_ARATH Glutamate receptor 2.1 OS=Arabidopsis thaliana OX=3702 GN=GLR2.1 PE=2 SV=2; tr|A0A2P6QA74|A0A2P6QA74_ROSCH Glutamate receptor OS=Rosa chinensis OX=74649 GN=RchiOBHm_Chr5g0031641 PE=3 SV=1	ANF_lig-bd_rcpt; ANF_receptor; FvH4_3g18830.t1_v4.0.a2; GluR_Plant; IGluLR_plant; IONOTROPIC GLUTAMATE RECEPTOR; ionotropic glutamate receptor activity; Iontropic_Glu_rcpt_pln; Iontro_rcpt; Lig_chan; membrane; PBP1_GABAb_receptor; Peripla_BP_I; Periplasmic binding protein-like I; Periplasmic binding protein-like II; SBP_bac_3; ; Solute-binding_3/MltF_N	glutamate-gated receptor activity; membrane	GO:0004970; GO:0016020
IR_4766	-2.59831	0.0390008	Fvb4:17571941-17572234	Fvb4	17568702	17570683	FvH4_4g14031	-	1258	Upstream TSS	NA	NA	AT2G34930.1 | disease resistance family protein / LRR family protein | Chr2:14737169-14739886 REVERSE LENGTH=905 | 201606; PREDICTED: probable leucine-rich repeat receptor-like protein kinase At1g35710 [Fragaria vesca subsp. vesca]; sp|Q6JN46|EIX2_SOLLC Receptor-like protein EIX2 OS=Solanum lycopersicum OX=4081 GN=EIX2 PE=1 SV=2; tr|A0A251QGD3|A0A251QGD3_PRUPE Uncharacterized protein OS=Prunus pe…	FAMILY NOT NAMED; FvH4_4g14031.t1_v4.0.a2; Leu-rich_rpt; LRR_6; LRR_8; LRR_dom_sf; LRR_N_plant-typ; LRRNT_2; protein binding; RNI-like;	protein binding	GO:0005515
IR_596	-2.5413	0.014771	Fvb1:15386582-15387278	Fvb1	15388239	15388571	FvH4_1g23532	-	962	Downstream TTS	3.3322	0.394885	PREDICTED: zinc finger CCHC domain-containing protein 9-like [Fragaria vesca subsp. vesca]	FvH4_1g23532.t1_v4.0.a2	NA	NA
IR_596	-2.5413	0.014771	Fvb1:15386582-15387278	Fvb1	15389120	15389873	FvH4_1g23540	-	1843	Downstream TTS	-2.05661	0.345632	AT5G44750.1 | DNA-directed DNA polymerase | Chr5:18052669-18059581 FORWARD LENGTH=1101 | 201606; DNA repair protein REV1 isoform X2 [Rosa chinensis]; sp|A3EWL3|REV1_ARATH DNA repair protein REV1 OS=Arabidopsis thaliana OX=3702 GN=REV1 PE=2 SV=1; tr|A0A2P6PLS2|A0A2P6PLS2_ROSCH DNA repair protein REV1 OS=Rosa chinensis OX=74649 GN=RchiOBHm_Chr6g0254741 PE=3 SV=1	disorder_prediction; FAMILY NOT NAMED; FvH4_1g23540.t1_v4.0.a2	NA	NA
IR_3236	-2.25962	0.0293519	Fvb3:20264404-20264710	Fvb3	20257280	20264168	FvH4_3g27180	+	236	Downstream TTS	3.47906	5.39787e-11	AT2G21530.1 | SMAD/FHA domain-containing protein | Chr2:9219372-9220464 FORWARD LENGTH=209 | 201606; PREDICTED: uncharacterized protein LOC101297045 isoform X3 [Fragaria vesca subsp. vesca]; tr|A0A2P6QEZ8|A0A2P6QEZ8_ROSCH Putative zeaxanthin epoxidase OS=Rosa chinensis OX=74649 GN=RchiOBHm_Chr5g0049851 PE=4 SV=1	disorder_prediction; FHA; FHA_dom; FHA_DOMAIN; FvH4_3g27180.t1_v4.0.a2; NUCLEAR INHIBITOR OF PROTEIN PHOSPHATASE-1; protein binding; ; SMAD/FHA domain; SMAD_FHA_dom_sf	protein binding	GO:0005515
IR_6785	-2.09847	0.0334794	Fvb6:2057022-2057368	Fvb6	2051769	2055443	FvH4_6g03790	-	1579	Upstream TSS	6.3754	1.83945e-07	AT3G04940.2 | cysteine synthase D1 | Chr3:1365681-1367508 FORWARD LENGTH=324 | 201606; PREDICTED: cysteine synthase-like isoform X1 [Fragaria vesca subsp. vesca]; sp|Q00834|CYSK_SPIOL Cysteine synthase OS=Spinacia oleracea OX=3562 PE=1 SV=1; tr|A0A2P6R6A2|A0A2P6R6A2_ROSCH Putative cysteine synthase OS=Rosa chinensis OX=74649 GN=RchiOBHm_Chr3g0452301 PE=4 SV=1	CBS_like; CysK; Cys_synth; Cysteine and methionine metabolism; cysteine biosynthetic process from serine; cysteine synthase activity; FvH4_6g03790.t1_v4.0.a2; PALP; PLP-dep; Seleno-amino acid biosynthesis (plants); SER/THR DEHYDRATASE AND TRP SYNTHASE FAMILY MEMBER; ; Sulfur metabolism; TIGR01136; TIGR01139; Tryptophan synthase beta subunit-like PLP-dependent enzymes; Trypto_synt_PLP_dependent	cysteine biosynthetic process from serine; cysteine synthase activity	GO:0004124; GO:0006535
IR_6785	-2.09847	0.0334794	Fvb6:2057022-2057368	Fvb6	2057846	2059469	FvH4_6g03800	-	479	Downstream TTS	NA	NA	AT5G48770.1 | Disease resistance protein (TIR-NBS-LRR class) family | Chr5:19773277-19777242 REVERSE LENGTH=1190 | 201606; PREDICTED: uncharacterized protein LOC101301603 [Fragaria vesca subsp. vesca]; tr|A0A251QF54|A0A251QF54_PRUPE Uncharacterized protein OS=Prunus persica OX=3760 GN=PRUPE_2G127000 PE=4 SV=1	Coil; FvH4_6g03800.t1_v4.0.a2; LEUCINE-RICH REPEAT-CONTAINING PROTEIN; protein binding; signal transduction; ; TIR; TIR_dom; Toll/Interleukin receptor TIR domain; Toll_tir_struct_dom_sf	protein binding; signal transduction	GO:0005515; GO:0007165
IR_2155	2.07895	0.0355187	Fvb2:23374133-23374509	Fvb2	23367834	23373495	FvH4_2g30220	+	638	Downstream TTS	1.90379	0.282741	AT4G13350.2 | NSP (nuclear shuttle protein)-interacting GTPase | Chr4:7770170-7773321 REVERSE LENGTH=602 | 201606; PREDICTED: uncharacterized protein LOC105349887 [Fragaria vesca subsp. vesca]; sp|Q8RXE7|AGD14_ARATH Probable ADP-ribosylation factor GTPase-activating protein AGD14 OS=Arabidopsis thaliana OX=3702 GN=AGD14 PE=1 SV=2; tr|A0A2P6Q1Q5|A0A2P6Q1Q5_ROSCH Putative Arf GTPase activating prot…	ArfGap; ARFGAP; ArfGAP_dom; ArfGAP_dom_sf; ARFGAP/RecO; ArfGap/RecO-like zinc finger; ARFGAP/RECO-LIKE ZINC FINGER DOMAIN-CONTAINING PROTEIN; disorder_prediction; FAMILY NOT NAMED; FvH4_2g30220.t1_v4.0.a2; GTPase activator activity; REVINTRACTNG	GTPase activator activity	GO:0005096
IR_2155	2.07895	0.0355187	Fvb2:23374133-23374509	Fvb2	23377300	23378665	FvH4_2g30230	-	2792	Downstream TTS	-2.997	0.000155366	AT2G25680.1 | molybdate transporter 1 | Chr2:10933167-10934537 REVERSE LENGTH=456 | 201606; PREDICTED: molybdate transporter 1 [Fragaria vesca subsp. vesca]; sp|Q9SL95|MOT1_ARATH Molybdate transporter 1 OS=Arabidopsis thaliana OX=3702 GN=MOT1 PE=1 SV=1; tr|A0A2P6Q1T1|A0A2P6Q1T1_ROSCH Putative molybdate transporter 1/2 OS=Rosa chinensis OX=74649 GN=RchiOBHm_Chr6g0312651 PE=4 SV=1	NA	integral to membrane; molybdate ion transmembrane transporter activity; molybdate ion transport	GO:0015098; GO:0015689; GO:0016021
IR_5993	2.23316	0.0134382	Fvb5:13365820-13366228	Fvb5	13368134	13368527	FvH4_5g21990	-	1907	Downstream TTS	-0.820917	0.525525	AT2G35290.1 | hypothetical protein | Chr2:14861635-14862000 REVERSE LENGTH=121 | 201606; PREDICTED: uncharacterized protein LOC101309055 [Fragaria vesca subsp. vesca]; tr|A0A2P6P9Z0|A0A2P6P9Z0_ROSCH Uncharacterized protein OS=Rosa chinensis OX=74649 GN=RchiOBHm_Chr7g0209491 PE=4 SV=1	FAMILY NOT NAMED; FvH4_5g21990.t1_v4.0.a2;	NA	NA
IR_3834	2.3171	0.0235124	Fvb3:32528599-32528875	Fvb3	32526072	32528123	FvH4_3g37980	+	476	Downstream TTS	NA	NA	AT4G27190.1 | NB-ARC domain-containing disease resistance protein | Chr4:13620977-13623934 REVERSE LENGTH=985 | 201606; PREDICTED: disease resistance protein At4g27190-like [Fragaria vesca subsp. vesca]; sp|Q9T048|DRL27_ARATH Disease resistance protein At4g27190 OS=Arabidopsis thaliana OX=3702 GN=At4g27190 PE=2 SV=1; tr|A0A2P6QMR3|A0A2P6QMR3_ROSCH Putative toll-like receptor, P-loop containing nu…	Activation of caspases through apoptosome-mediated cleavage; ADP binding; FAMILY NOT NAMED; Formation of apoptosome; FvH4_3g37980.t1_v4.0.a2; L domain-like; LRR_dom_sf; NB-ARC; Neutrophil degranulation; P-loop containing nucleoside triphosphate hydrolases; P-loop_NTPase; Regulation of the apoptosome activity; ; SMAC (DIABLO) binds to IAPs; SMAC(DIABLO)-mediated dissociation of IAP:caspase complex…	ADP binding	GO:0043531
IR_3834	2.3171	0.0235124	Fvb3:32528599-32528875	Fvb3	32529284	32531134	FvH4_3g37990	-	410	Downstream TTS	NA	NA	AT2G29590.1 | Thioesterase superfamily protein | Chr2:12654602-12655432 REVERSE LENGTH=158 | 201606; PREDICTED: acyl-coenzyme A thioesterase 13-like [Fragaria vesca subsp. vesca] &gt;gi|764558577|ref|XP_011460919.1| PREDICTED: acyl-coenzyme A thioesterase 13-like [Fragaria vesca subsp. vesca]; sp|Q5R833|ACO13_PONAB Acyl-coenzyme A thioesterase 13 OS=Pongo abelii OX=9601 GN=ACOT13 PE=2 SV=1; tr|A0…	4HBT; ACOT13; acyl-CoA hydrolase activity; FvH4_3g37990.t1_v4.0.a2; HotDog_dom_sf; Mitochondrial Fatty Acid Beta-Oxidation; PaaI_thioesterase; ; THIOESTERASE SUPERFAMILY MEMBER-RELATED; Thioesterase/thiol ester dehydrase-isomerase; Thioestr_dom	fatty acyl-CoA hydrolase activity	GO:0047617
IR_775	2.45942	0.0426789	Fvb1:18427790-18428081	Fvb1	18423967	18427686	FvH4_1g26610	+	104	Downstream TTS	0.337641	0.602812	AT5G63540.1 | recQ-mediated instability protein (DUF1767) | Chr5:25441033-25444373 REVERSE LENGTH=644 | 201606; PREDICTED: recQ-mediated genome instability protein 1 [Fragaria vesca subsp. vesca]; sp|Q5XUX6|RMI1_ARATH RecQ-mediated genome instability protein 1 OS=Arabidopsis thaliana OX=3702 GN=RMI1 PE=1 SV=1; tr|A0A2P6P4R9|A0A2P6P4R9_ROSCH Putative RecQ mediated genome instability protein OS=Ros…	disorder_prediction; FAMILY NOT NAMED; FvH4_1g26610.t1_v4.0.a2; G2/M DNA damage checkpoint; HDR through Homologous Recombination (HRR); HDR through Single Strand Annealing (SSA); Homologous DNA Pairing and Strand Exchange; nucleotide binding; Presynaptic phase of homologous DNA pairing and strand exchange; Processing of DNA double-strand break ends; RecQ helicase-Topo III complex; RECQ-MEDIATED G…	nucleotide binding; RecQ family helicase-topoisomerase III complex	GO:0000166; GO:0031422
IR_11	2.4968	0.00620091	Fvb1:152371-152797	Fvb1	153822	155409	FvH4_1g00300	+	1026	Upstream TSS	7.66954	0.205428	AT3G06240.1 | F-box family protein | Chr3:1887336-1888619 FORWARD LENGTH=427 | 201606; PREDICTED: F-box/kelch-repeat protein At3g23880-like [Fragaria vesca subsp. vesca]; sp|Q8GXC7|FBK50_ARATH F-box/kelch-repeat protein At3g06240 OS=Arabidopsis thaliana OX=3702 GN=At3g06240 PE=2 SV=1; tr|A0A2P6PS24|A0A2P6PS24_ROSCH Putative F-box domain-containing protein OS=Rosa chinensis OX=74649 GN=RchiOBHm_Ch…	disorder_prediction; FAMILY NOT NAMED; FBA_1; F-box; FBOX; F-box-assoc_dom_typ1; F-box-assoc_interact_dom; F-box_dom; F-box domain; F-box-like_dom_sf; FvH4_1g00300.t1_v4.0.a2; protein binding; ; TIGR01640	protein binding	GO:0005515
IR_6834	2.64137	0.0128171	Fvb6:3541085-3541400	Fvb6	3542417	3546397	FvH4_6g06190	-	1018	Downstream TTS	-1.83447	0.0258294	AT4G02570.4 | cullin 1 | Chr4:1129315-1133435 FORWARD LENGTH=738 | 201606; PREDICTED: cullin-1-like [Fragaria vesca subsp. vesca]; sp|Q94AH6|CUL1_ARATH Cullin-1 OS=Arabidopsis thaliana OX=3702 GN=CUL1 PE=1 SV=1; tr|A0A2P6R6Z6|A0A2P6R6Z6_ROSCH Putative cullin OS=Rosa chinensis OX=74649 GN=RchiOBHm_Chr3g0455211 PE=4 SV=1	Cullin; CULLIN; Cullin_N; Cullin repeat-like; Cullin_repeat-like_dom_sf; FvH4_6g06190.t1_v4.0.a2; FvH4_6g06190.t4_v4.0.a2; Neddylation; ; ubiquitin-dependent protein catabolic process; ubiquitin protein ligase binding	ubiquitin-dependent protein catabolic process; ubiquitin protein ligase binding	GO:0006511; GO:0031625
IR_9406	2.69702	0.00153263	Fvb7:22424894-22425265	Fvb7	22420671	22422572	FvH4_7g30930	+	2322	Downstream TTS	1.03829	0.443039	AT4G27950.1 | cytokinin response factor 4 | Chr4:13909732-13910739 REVERSE LENGTH=335 | 201606; PREDICTED: ethylene-responsive transcription factor CRF4 [Fragaria vesca subsp. vesca]; sp|Q9SUE3|CRF4_ARATH Ethylene-responsive transcription factor CRF4 OS=Arabidopsis thaliana OX=3702 GN=CRF4 PE=1 SV=2; tr|A0A2P6SNV6|A0A2P6SNV6_ROSCH Putative transcription factor AP2-EREBP family OS=Rosa chinensis O…	AP2; AP2_ERF; AP2/ERF_dom; AP2/ERF_dom_sf; disorder_prediction; DNA-bd_dom_sf; DNA binding; DNA-binding domain; DNA-binding transcription factor activity; ETHRSPELEMNT; FvH4_7g30930.t1_v4.0.a2; regulation of transcription, DNA-templated; SHN SHINE , DNA BINDING / TRANSCRIPTION FACTOR;	DNA binding; DNA-binding transcription factor activity; regulation of DNA-templated transcription	GO:0003677; GO:0003700; GO:0006355
IR_3654	2.77583	0.00220382	Fvb3:29199241-29199698	Fvb3	29200590	29202039	FvH4_3g33681	-	893	Downstream TTS	NA	NA	AT5G39340.1 | histidine-containing phosphotransmitter 3 | Chr5:15748941-15750248 FORWARD LENGTH=155 | 201606; PREDICTED: histidine-containing phosphotransfer protein 6-like isoform X1 [Fragaria vesca subsp. vesca]; sp|Q6VAK3|OHP1_ORYSJ Histidine-containing phosphotransfer protein 1 OS=Oryza sativa subsp. japonica OX=39947 GN=AHP1 PE=2 SV=1; tr|A0A2P6QHV5|A0A2P6QHV5_ROSCH Putative signal transduct…	FAMILY NOT NAMED; FvH4_3g33681.t1_v4.0.a2; Histidine-containing phosphotransfer domain, HPT domain; Hpt; HPT; HPT_dom_sf; phosphorelay signal transduction system; ; Sig_transdc_His_kin_Hpt_dom	phosphorelay signal transduction system	GO:0000160
IR_7885	2.91542	0.0297569	Fvb6:24114206-24114597	Fvb6	24109838	24111756	FvH4_6g30930	+	2450	Downstream TTS	-3.02303	1.3794e-06	AT1G15670.1 | Galactose oxidase/kelch repeat superfamily protein | Chr1:5390119-5391198 FORWARD LENGTH=359 | 201606; PREDICTED: F-box/kelch-repeat protein At1g15670-like [Fragaria vesca subsp. vesca]; sp|Q9LMR5|FK126_ARATH F-box/kelch-repeat protein At1g15670 OS=Arabidopsis thaliana OX=3702 GN=At1g15670 PE=2 SV=1; tr|M5WSY7|M5WSY7_PRUPE Uncharacterized protein OS=Prunus persica OX=3760 GN=PRUPE_3…	FAMILY NOT NAMED; FvH4_6g30930.t1_v4.0.a2; Kelch_1; Kelch motif; Kelch-typ_b-propeller; protein binding;	protein binding	GO:0005515
IR_4953	3.00177	0.0206738	Fvb4:21372771-21373142	Fvb4	21375698	21376443	FvH4_4g17440	+	2557	Upstream TSS	9.8487	8.42102e-06	AT5G18600.1 | Thioredoxin superfamily protein | Chr5:6183466-6183774 REVERSE LENGTH=102 | 201606; PREDICTED: monothiol glutaredoxin-S2-like [Fragaria vesca subsp. vesca]; sp|Q8L8Z8|GRXS2_ARATH Monothiol glutaredoxin-S2 OS=Arabidopsis thaliana OX=3702 GN=GRXS2 PE=3 SV=1; tr|A0A2P6QY55|A0A2P6QY55_ROSCH Putative oxidoreductase OS=Rosa chinensis OX=74649 GN=RchiOBHm_Chr4g0421391 PE=4 SV=1	cell redox homeostasis; electron transfer activity; FvH4_4g17440.t1_v4.0.a2; GlrX-like_pln_2; Glutaredoxin; GLUTAREDOXIN; GLUTAREDOXIN_2; Glutaredoxin_subgr; GRX_GRXh_1_2_like; MONOTHIOL GLUTAREDOXIN-S2; protein disulfide oxidoreductase activity; Thioredoxin-like; Thioredoxin-like_sf; TIGR02189	cell redox homeostasis; electron transfer activity; protein-disulfide reductase activity	GO:0009055; GO:0015035; GO:0045454
IR_515	3.05618	0.0351604	Fvb1:13495744-13496078	Fvb1	13498952	13506721	FvH4_1g21510	-	2875	Downstream TTS	NA	NA	AT1G47710.1 | Serine protease inhibitor (SERPIN) family protein | Chr1:17558271-17560061 FORWARD LENGTH=391 | 201606; PREDICTED: serpin-ZX-like [Fragaria vesca subsp. vesca]; sp|Q9S7T8|SPZX_ARATH Serpin-ZX OS=Arabidopsis thaliana OX=3702 GN=At1g47710 PE=1 SV=1; tr|A0A2P6RSN3|A0A2P6RSN3_ROSCH Putative Serpin family protein OS=Rosa chinensis OX=74649 GN=RchiOBHm_Chr2g0122001 PE=3 SV=1	extracellular space; FvH4_1g21510.t1_v4.0.a2; RING/U-box; SERINE PROTEASE INHIBITOR, SERPIN; Serpin; SERPIN; Serpin_CS; Serpin_dom; Serpin_fam; Serpins; Serpin_sf; Serpin_sf_2; ; ZF_RING_2; Znf_RING; Znf_RING/FYVE/PHD	extracellular space	GO:0005615
IR_4778	3.11509	0.000151183	Fvb4:17791717-17792069	Fvb4	17783898	17791453	FvH4_4g14190	-	264	Upstream TSS	6.76032	6.86819e-41	AT5G35630.3 | glutamine synthetase 2 | Chr5:13831220-13833239 FORWARD LENGTH=430 | 201606; PREDICTED: glutamine synthetase leaf isozyme, chloroplastic [Fragaria vesca subsp. vesca]; sp|P15102|GLNA4_PHAVU Glutamine synthetase leaf isozyme, chloroplastic OS=Phaseolus vulgaris OX=3885 PE=2 SV=1; tr|A0A2P6QXG7|A0A2P6QXG7_ROSCH Glutamine synthetase OS=Rosa chinensis OX=74649 GN=RchiOBHm_Chr4g0419011 P…	Alanine, aspartate and glutamate metabolism; Amino acid synthesis and interconversion (transamination); Ammonia assimilation cycle I; Ammonia assimilation cycle II; Arginine biosynthesis; Astrocytic Glutamate-Glutamine Uptake And Metabolism; catalytic activity; FvH4_4g14190.t1_v4.0.a2; FvH4_4g14190.t2_v4.0.a2; GLNA_1; GLNA_ATP; Gln_synt_b-grasp; Gln-synt_C; Gln_synth_cat_dom; Gln_synth_gly_rich_s…	catalytic activity; glutamine biosynthetic process; glutamine synthetase activity; obsolete nitrogen compound metabolic process	GO:0003824; GO:0004356; GO:0006542; GO:0006807
IR_4778	3.11509	0.000151183	Fvb4:17791717-17792069	Fvb4	17793034	17800029	FvH4_4g14200	+	966	Upstream TSS	0.745311	0.0276222	AT4G14290.1 | alpha/beta-Hydrolases superfamily protein | Chr4:8225547-8230057 REVERSE LENGTH=558 | 201606; PREDICTED: uncharacterized protein LOC101299950 [Fragaria vesca subsp. vesca] &gt;gi|764572644|ref|XP_011462782.1| PREDICTED: uncharacterized protein LOC101299950 [Fragaria vesca subsp. vesca] &gt;gi|764572648|ref|XP_011462783.1| PREDICTED: uncharacterized protein LOC101299950 [Fragaria ves…	AB_hydrolase; alpha/beta-Hydrolases; ALPHA/BETA-HYDROLASES SUPERFAMILY PROTEIN; disorder_prediction; FAMILY NOT NAMED; FvH4_4g14200.t1_v4.0.a2; FvH4_4g14200.t2_v4.0.a2; Hydrolase_4	NA	NA
IR_8220	3.44645	0.0402876	Fvb6:30688434-30688855	Fvb6	30690118	30692437	FvH4_6g38782	-	1264	Downstream TTS	-3.97964	3.6993e-05	AT5G51200.2 | nuclear pore complex protein (DUF3414) | Chr5:20804926-20819408 FORWARD LENGTH=1863 | 201606; putative nucleoporin Nup186/Nup192/Nup205 [Rosa chinensis]; sp|F4KBW6|NU205_ARATH Nuclear pore complex protein NUP205 OS=Arabidopsis thaliana OX=3702 GN=NUP205 PE=1 SV=1; tr|A0A2P6S0E8|A0A2P6S0E8_ROSCH Putative nucleoporin Nup186/Nup192/Nup205 OS=Rosa chinensis OX=74649 GN=RchiOBHm_Chr2g015…	Defective TPR may confer susceptibility towards thyroid papillary carcinoma (TPC); FAMILY NOT NAMED; FvH4_6g38782.t1_v4.0.a2; ISG15 antiviral mechanism; NEP/NS2 Interacts with the Cellular Export Machinery; NS1 Mediated Effects on Host Pathways; Nuclear import of Rev protein; nuclear pore; Nuclear Pore Complex (NPC) Disassembly; NUCLEAR PORE COMPLEX PROTEIN NUP205; Nup186/Nup192/Nup205; Nup192; R…	nuclear pore	GO:0005643
IR_1512	3.58238	9.44425e-05	Fvb2:10440240-10440868	Fvb2	10431326	10440151	FvH4_2g11940	+	89	Downstream TTS	-0.414333	0.249507	AT5G09400.1 | K+ uptake permease 7 | Chr5:2916377-2920604 FORWARD LENGTH=858 | 201606; PREDICTED: potassium transporter 7 isoform X1 [Fragaria vesca subsp. vesca]; sp|Q9FY75|POT7_ARATH Potassium transporter 7 OS=Arabidopsis thaliana OX=3702 GN=POT7 PE=1 SV=2; tr|A0A2P6PR16|A0A2P6PR16_ROSCH Potassium transporter OS=Rosa chinensis OX=74649 GN=RchiOBHm_Chr6g0271831 PE=3 SV=1	disorder_prediction; FvH4_2g11940.t1_v4.0.a2; K_trans; K+_transporter; membrane; OSMOTIC STRESS POTASSIUM TRANSPORTER; potassium ion transmembrane transport; potassium ion transmembrane transporter activity; ; TIGR00794	membrane; potassium ion transmembrane transport; potassium ion transmembrane transporter activity	GO:0015079; GO:0016020; GO:0071805
IR_1512	3.58238	9.44425e-05	Fvb2:10440240-10440868	Fvb2	10441923	10449283	FvH4_2g11950	-	1056	Downstream TTS	0.00254647	1	AT4G09580.1 | SNARE associated Golgi protein family | Chr4:6052721-6054313 REVERSE LENGTH=287 | 201606; PREDICTED: uncharacterized membrane protein At4g09580-like [Fragaria vesca subsp. vesca] &gt;gi|764531816|ref|XP_011458415.1| PREDICTED: uncharacterized membrane protein At4g09580-like [Fragaria vesca subsp. vesca]; sp|Q8L586|Y4958_ARATH Uncharacterized membrane protein At4g09580 OS=Arabidopsis…	FAMILY NOT NAMED; FvH4_2g11950.t1_v4.0.a2; FvH4_2g11950.t2_v4.0.a2; FvH4_2g11950.t3_v4.0.a2; ; SNARE_assoc	NA	NA
IR_8587	3.68107	0.0190192	Fvb7:780443-780879	Fvb7	777063	780379	FvH4_7g00180	+	64	Downstream TTS	3.07796	9.07299e-05	AT2G44430.1 | DNA-binding bromodomain-containing protein | Chr2:18333603-18336165 FORWARD LENGTH=646 | 201606; PREDICTED: microtubule-associated protein futsch [Fragaria vesca subsp. vesca]; tr|A0A2P6S6Y0|A0A2P6S6Y0_ROSCH Putative transcription factor MYB-related family OS=Rosa chinensis OX=74649 GN=RchiOBHm_Chr1g0313431 PE=4 SV=1	Bromodomain; BROMODOMAIN_2; Bromodomain-like_sf; Coil; disorder_prediction; DNA binding; FAMILY NOT NAMED; FvH4_7g00180.t1_v4.0.a2; Homeobox-like_sf; Homeodomain-like; Myb_DNA-binding; protein binding; SANT; SANT/Myb;	DNA binding; protein binding	GO:0003677; GO:0005515
IR_8587	3.68107	0.0190192	Fvb7:780443-780879	Fvb7	781159	786575	FvH4_7g00190	-	281	Downstream TTS	0.847398	0.0269356	AT5G13020.1 | Emsy N Terminus (ENT)/ plant Tudor-like domains-containing protein | Chr5:4129691-4132089 REVERSE LENGTH=397 | 201606; PREDICTED: protein EMSY-LIKE 3 [Fragaria vesca subsp. vesca]; sp|F4K2F0|EML3_ARATH Protein EMSY-LIKE 3 OS=Arabidopsis thaliana OX=3702 GN=EML3 PE=1 SV=1; tr|A0A2P6S6W8|A0A2P6S6W8_ROSCH Putative ENT domain, protein EMSY-LIKE, plant OS=Rosa chinensis OX=74649 GN=RchiO…	Coil; defense response to fungus; disorder_prediction; EMSY-LIKE_plant; ENT; ENT_dom; ENT_dom-like_sf; ENT-like; FAMILY NOT NAMED; FvH4_7g00190.t1_v4.0.a2; PROTEIN EMSY-LIKE 4; Tudor/PWWP/MBT	defense response to fungus	GO:0050832
IR_5510	4.0142	0.0211864	Fvb5:1312101-1312690	Fvb5	1304202	1311433	FvH4_5g02090	+	668	Downstream TTS	1.62473	0.0313946	AT1G63440.1 | heavy metal atpase 5 | Chr1:23527655-23531109 FORWARD LENGTH=995 | 201606; PREDICTED: probable copper-transporting ATPase HMA5 [Fragaria vesca subsp. vesca]; sp|Q9SH30|HMA5_ARATH Probable copper-transporting ATPase HMA5 OS=Arabidopsis thaliana OX=3702 GN=HMA5 PE=1 SV=2; tr|A0A2P6P715|A0A2P6P715_ROSCH Putative cu(2+)-exporting ATPase OS=Rosa chinensis OX=74649 GN=RchiOBHm_Chr7g019814…	ATPASE_E1_E2; ATPase_P-typ_cyto_dom_N; ATPase_P-typ_P_site; ATPase_P-typ_TM_dom_sf; ATPase_P-typ_transduc_dom_A_sf; C1.7:_P-type_atpase_like; Calcium ATPase, transduction domain A; Calcium ATPase, transmembrane domain M; CATATPASE; cation transport; cation-transporting ATPase activity; copper ion binding; CUATPASE; CUATPASEI; disorder_prediction; E1-E2_ATPase; FAMILY NOT NAMED; FvH4_5g02090.t1_v4…	ATPase-coupled monoatomic cation transmembrane transporter activity; copper ion binding; integral to membrane; metal ion binding; metal ion transport; monoatomic cation transport; nucleotide binding	GO:0000166; GO:0005507; GO:0006812; GO:0016021; GO:0019829; GO:0030001; GO:0046872
IR_5185	4.28542	0.0236177	Fvb4:26209453-26209844	Fvb4	26205727	26209130	FvH4_4g23860	-	323	Upstream TSS	4.13575	5.60148e-05	AT1G67400.1 | ELMO/CED-12 family protein | Chr1:25248099-25250664 REVERSE LENGTH=281 | 201606; PREDICTED: ELMO domain-containing protein A isoform X3 [Fragaria vesca subsp. vesca]; sp|Q54YW1|ELMOA_DICDI ELMO domain-containing protein A OS=Dictyostelium discoideum OX=44689 GN=elmoA PE=1 SV=1; tr|A0A2P6R0E5|A0A2P6R0E5_ROSCH Putative ELMO domain-containing protein OS=Rosa chinensis OX=74649 GN=RchiO…	ELMO; ELMO_CED12; ELMO/CED-12 FAMILY PROTEIN; ELMO_dom; ENGULFMENT AND CELL MOTILITY; FvH4_4g23860.t1_v4.0.a2	NA	NA
IR_5185	4.28542	0.0236177	Fvb4:26209453-26209844	Fvb4	26210268	26213118	FvH4_4g23870	-	425	Downstream TTS	10.097	0.0849523	AT1G67980.1 | caffeoyl-CoA 3-O-methyltransferase | Chr1:25487724-25488934 FORWARD LENGTH=232 | 201606; PREDICTED: flavonoid 3',5'-methyltransferase-like [Fragaria vesca subsp. vesca]; sp|C7AE94|FAOMT_VITVI Flavonoid 3',5'-methyltransferase OS=Vitis vinifera OX=29760 GN=FAOMT PE=1 SV=1; tr|A0A2P6R0H7|A0A2P6R0H7_ROSCH Putative flavonoid 3',5'-methyltransferase OS=Rosa chinensis OX=74649 GN=RchiOBHm…	AdoMet_MTases; FvH4_4g23870.t1_v4.0.a2; Methyltransf_3; O-methyltransferase activity; O-METHYLTRANSFERASE-RELATED; S-adenosyl-L-methionine-dependent methyltransferases; SAM-dependent_MTases; SAM_O-MeTrfase; SAM_OMT_I;	O-methyltransferase activity	GO:0008171
IR_8524	4.28688	0.0174021	Fvb6:38502856-38503327	Fvb6	38504874	38505346	FvH4_6g52130	+	1548	Upstream TSS	NA	NA	NA	disorder_prediction; FvH4_6g52130.t1_v4.0.a2	NA	NA
IR_8524	4.28688	0.0174021	Fvb6:38502856-38503327	Fvb6	38501075	38501926	FvH4_6g52120	+	930	Downstream TTS	NA	NA	PREDICTED: classical arabinogalactan protein 10-like [Fragaria vesca subsp. vesca]; tr|A0A2P6S5X7|A0A2P6S5X7_ROSCH Uncharacterized protein OS=Rosa chinensis OX=74649 GN=RchiOBHm_Chr2g0173651 PE=4 SV=1	disorder_prediction; FvH4_6g52120.t1_v4.0.a2	NA	NA
IR_8035	4.50202	0.0110981	Fvb6:26709617-26710053	Fvb6	26705129	26707151	FvH4_6g33680	-	2466	Upstream TSS	-0.212751	0.824758	AT3G13780.1 | SMAD/FHA domain-containing protein | Chr3:4525108-4526214 FORWARD LENGTH=309 | 201606; PREDICTED: ABC transporter F family member 4 [Fragaria vesca subsp. vesca]; tr|A0A2P6RY55|A0A2P6RY55_ROSCH Putative transcription factor interactor and regulator FHA-SMAD family OS=Rosa chinensis OX=74649 GN=RchiOBHm_Chr2g0143591 PE=4 SV=1	disorder_prediction; FAMILY NOT NAMED; FvH4_6g33680.t1_v4.0.a2; protein binding; SMAD/FHA domain; SMAD_FHA_dom_sf	protein binding	GO:0005515
IR_8035	4.50202	0.0110981	Fvb6:26709617-26710053	Fvb6	26712918	26713271	FvH4_6g33681	+	2866	Upstream TSS	NA	NA	NA	FvH4_6g33681.t1_v4.0.a2	NA	NA
IR_706	4.57721	0.00138796	Fvb1:17337963-17338253	Fvb1	17340871	17343430	FvH4_1g25560	+	2619	Upstream TSS	1.52235	0.417099	AT2G01210.1 | Leucine-rich repeat protein kinase family protein | Chr2:119509-121734 REVERSE LENGTH=716 | 201606; PREDICTED: probable inactive leucine-rich repeat receptor-like protein kinase At1g66830 [Fragaria vesca subsp. vesca] &gt;gi|764642826|ref|XP_011471029.1| PREDICTED: probable inactive leucine-rich repeat receptor-like protein kinase At1g66830 [Fragaria vesca subsp. vesca]; sp|Q9ZU46|Z…	ATP binding; FAMILY NOT NAMED; FvH4_1g25560.t1_v4.0.a2; Kinase-like_dom_sf; L domain-like; Leu-rich_rpt; LRR_1; LRR_dom_sf; LRR_N_plant-typ; LRRNT_2; Pkinase; protein binding; protein kinase activity; PROTEIN_KINASE_DOM; Protein kinase-like (PK-like); PROTEIN_KINASE_TYR; protein phosphorylation; Prot_kinase_dom; ; Tyr_kinase_AS	ATP binding; protein binding; protein kinase activity; protein phosphorylation	GO:0004672; GO:0005515; GO:0005524; GO:0006468
IR_706	4.57721	0.00138796	Fvb1:17337963-17338253	Fvb1	17333827	17337058	FvH4_1g25551	+	905	Downstream TTS	1.91382	0.00455012	AT1G66840.2 | PLASTID MOVEMENT IMPAIRED protein (DUF827) | Chr1:24933998-24936116 REVERSE LENGTH=607 | 201606; PREDICTED: protein PLASTID MOVEMENT IMPAIRED 2 [Fragaria vesca subsp. vesca] &gt;gi|764642819|ref|XP_011471028.1| PREDICTED: protein PLASTID MOVEMENT IMPAIRED 2 [Fragaria vesca subsp. vesca]; sp|Q9C9N6|PMI2_ARATH Protein PLASTID MOVEMENT IMPAIRED 2 OS=Arabidopsis thaliana OX=3702 GN=PMI2…	Coil; disorder_prediction; FAMILY NOT NAMED; FvH4_1g25551.t1_v4.0.a2; PROTEIN PLASTID MOVEMENT IMPAIRED 15-RELATED; Web; WEMBL	NA	NA
IR_7448	4.95788	0.0180645	Fvb6:16587555-16587908	Fvb6	16588363	16589671	FvH4_6g22854	+	456	Upstream TSS	NA	NA	ascorbate oxidase, partial [Rosa roxburghii]; AT5G21105.2 | Plant L-ascorbate oxidase | Chr5:7174321-7177409 FORWARD LENGTH=397 | 201606; sp|Q40588|ASO_TOBAC L-ascorbate oxidase OS=Nicotiana tabacum OX=4097 GN=AAO PE=2 SV=1; tr|S4VLP3|S4VLP3_9ROSA Ascorbate oxidase (Fragment) OS=Rosa roxburghii OX=74654 PE=2 SV=1	copper ion binding; Cu-oxidase; Cu-oxidase_2; Cupredoxin; Cupredoxins; FvH4_6g22854.t1_v4.0.a2; MULTI-COPPER OXIDASE; oxidation-reduction process; oxidoreductase activity;	copper ion binding; obsolete oxidation-reduction process; oxidoreductase activity	GO:0005507; GO:0016491; GO:0055114
IR_7448	4.95788	0.0180645	Fvb6:16587555-16587908	Fvb6	16584150	16585218	FvH4_6g22853	+	2337	Downstream TTS	NA	NA	AT5G21105.3 | Plant L-ascorbate oxidase | Chr5:7172727-7177657 FORWARD LENGTH=543 | 201606; PREDICTED: L-ascorbate oxidase-like [Fragaria vesca subsp. vesca]; sp|P24792|ASO_CUCMA L-ascorbate oxidase OS=Cucurbita maxima OX=3661 GN=AAO PE=1 SV=2; tr|A0A2P6QF12|A0A2P6QF12_ROSCH Putative L-ascorbate oxidase OS=Rosa chinensis OX=74649 GN=RchiOBHm_Chr5g0049951 PE=3 SV=1	Ascorbate and aldarate metabolism; copper ion binding; Cu-oxidase_3; Cupredoxin; Cupredoxins; CuRO_1_AAO; FvH4_6g22853.t1_v4.0.a2; MULTI-COPPER OXIDASE;	copper ion binding	GO:0005507
IR_884	4.95864	0.0233046	Fvb1:21002196-21002717	Fvb1	20999847	21000269	FvH4_1g28701	-	1927	Upstream TSS	NA	NA	NA	disorder_prediction; FvH4_1g28701.t1_v4.0.a2	NA	NA
IR_884	4.95864	0.0233046	Fvb1:21002196-21002717	Fvb1	20994983	20999823	FvH4_1g28700	+	2373	Downstream TTS	2.9777	3.59612e-22	AT5G16710.1 | dehydroascorbate reductase 1 | Chr5:5483312-5484926 FORWARD LENGTH=258 | 201606; PREDICTED: glutathione S-transferase DHAR3, chloroplastic isoform X1 [Fragaria vesca subsp. vesca]; sp|Q8LE52|DHAR3_ARATH Glutathione S-transferase DHAR3, chloroplastic OS=Arabidopsis thaliana OX=3702 GN=DHAR3 PE=1 SV=1; tr|M9QZ14|M9QZ14_FRAAN Dehydroascorbate reductase (Fragment) OS=Fragaria ananassa O…	FAMILY NOT NAMED; FvH4_1g28700.t1_v4.0.a2; GLUTATHIONE S-TRANSFERASE DHAR3, CHLOROPLASTIC; Glutathione_S-Trfase; Glutathione-S-Trfase_C-like; Glutathione-S-Trfase_C_sf; Glutathione_S-Trfase_N; Glutathione_Transferase_(cyto; GST_C_2; GST_CTER; GST C-terminal domain-like; GST_N_3; GST_N_family; GST_NTER; Main_(cytGST); protein binding; Thioredoxin-like; Thioredoxin-like_sf	protein binding	GO:0005515
IR_4563	5.34529	0.0342435	Fvb4:11637374-11637992	Fvb4	11633971	11635143	FvH4_4g09692	-	2231	Upstream TSS	NA	NA	AT3G05850.1 | MuDR family transposase | Chr3:1743537-1745943 REVERSE LENGTH=777 | 201606; PREDICTED: uncharacterized protein LOC101301632, partial [Fragaria vesca subsp. vesca]; tr|A0A2P6QNS9|A0A2P6QNS9_ROSCH Putative transposase, MuDR, plant, Zinc finger, SWIM-type, MULE transposase OS=Rosa chinensis OX=74649 GN=RchiOBHm_Chr4g0384731 PE=4 SV=1	FAMILY NOT NAMED; FvH4_4g09692.t1_v4.0.a2; MULE; MULE_transposase_dom; ; ZF_SWIM; zinc ion binding; Znf_SWIM	zinc ion binding	GO:0008270
IR_2095	5.43787	3.72983e-06	Fvb2:21867454-21867633	Fvb2	21868179	21869781	FvH4_2g27610	+	547	Upstream TSS	1.07331	0.772139	AT5G59670.2 | Leucine-rich repeat protein kinase family protein | Chr5:24041538-24045478 FORWARD LENGTH=868 | 201606; putative leucine-rich repeat receptor-like serine/threonine-protein kinase [Quercus suber]; sp|Q9FN94|RLK0_ARATH Receptor-like protein kinase At5g59670 OS=Arabidopsis thaliana OX=3702 GN=At5g59670 PE=1 SV=1; tr|A0A2P4MN24|A0A2P4MN24_QUESU Putative leucine-rich repeat receptor-like…	ATP binding; FAMILY NOT NAMED; FvH4_2g27610.t1_v4.0.a2; Kinase-like_dom_sf; Pkinase_Tyr; protein kinase activity; PROTEIN_KINASE_DOM; Protein kinase-like (PK-like); protein phosphorylation; Prot_kinase_dom; Ser-Thr/Tyr_kinase_cat_dom;	ATP binding; protein kinase activity; protein phosphorylation	GO:0004672; GO:0005524; GO:0006468
IR_2095	5.43787	3.72983e-06	Fvb2:21867454-21867633	Fvb2	21863222	21867167	FvH4_2g27592	+	287	Downstream TTS	NA	NA	PREDICTED: uncharacterized protein LOC101304350 [Fragaria vesca subsp. vesca] &gt;gi|764540208|ref|XP_011459055.1| PREDICTED: uncharacterized protein LOC101304350 [Fragaria vesca subsp. vesca]	disorder_prediction; FvH4_2g27592.t1_v4.0.a2	NA	NA
IR_2095	5.43787	3.72983e-06	Fvb2:21867454-21867633	Fvb2	21870283	21873380	FvH4_2g27620	-	2651	Downstream TTS	1.66595	3.27e-08	AT1G21680.1 | DPP6 N-terminal domain-like protein | Chr1:7613028-7615148 FORWARD LENGTH=706 | 201606; PREDICTED: uncharacterized protein LOC101292474 [Fragaria vesca subsp. vesca]; sp|Q6NAR1|TOLB_RHOPA Tol-Pal system protein TolB OS=Rhodopseudomonas palustris (strain ATCC BAA-98 / CGA009) OX=258594 GN=tolB PE=3 SV=1; tr|A0A2P6PXE3|A0A2P6PXE3_ROSCH Putative transcription factor WD40-like family OS…	6-blade_b-propeller_TolB-like; DPP6 N-terminal domain-like; DPP6 N-TERMINAL DOMAIN-LIKE PROTEIN; FAMILY NOT NAMED; FvH4_2g27620.t1_v4.0.a2; PD40	NA	NA
IR_4749	5.59756	0.00710597	Fvb4:17182522-17182918	Fvb4	17184498	17185832	FvH4_4g13621	-	1581	Downstream TTS	NA	NA	AT3G31430.1 | zinc knuckle (CCHC-type) family protein | Chr3:12795861-12796871 REVERSE LENGTH=336 | 201606; PREDICTED: uncharacterized protein LOC105353156 [Fragaria vesca subsp. vesca]; tr|A0A2P4MMJ0|A0A2P4MMJ0_QUESU Uncharacterized protein OS=Quercus suber OX=58331 GN=CFP56_59889 PE=4 SV=1	At4g02000-like; DUF4283; FAMILY NOT NAMED; FvH4_4g13621.t1_v4.0.a2; ; zf-CCHC_4; Zn_knuckle_CX2CX4HX4C	NA	NA
IR_8481	5.7327	2.23082e-13	Fvb6:37157053-37157471	Fvb6	37152196	37154331	FvH4_6g49640	+	2722	Downstream TTS	1.25889	0.00470749	PREDICTED: uncharacterized protein LOC101309469 [Fragaria vesca subsp. vesca]; tr|A0A2P6R0N7|A0A2P6R0N7_ROSCH Putative F-box domain-containing protein OS=Rosa chinensis OX=74649 GN=RchiOBHm_Chr4g0430971 PE=4 SV=1	DUF295; FAMILY NOT NAMED; F-box; F-box_dom; F-box domain; F-box-like_dom_sf; FvH4_6g49640.t1_v4.0.a2; FvH4_6g49640.t2_v4.0.a2; protein binding;	protein binding	GO:0005515
IR_8481	5.7327	2.23082e-13	Fvb6:37157053-37157471	Fvb6	37158218	37161537	FvH4_6g49660	-	748	Downstream TTS	-0.196618	0.761371	AT1G59650.1 | CW14 protein (DUF1336) | Chr1:21920099-21922670 FORWARD LENGTH=492 | 201606; PREDICTED: uncharacterized protein LOC101303718 [Fragaria vesca subsp. vesca]; sp|F4JSE7|EDR2_ARATH Protein ENHANCED DISEASE RESISTANCE 2 OS=Arabidopsis thaliana OX=3702 GN=EDR2 PE=2 SV=1; tr|A0A2P6S4X5|A0A2P6S4X5_ROSCH Uncharacterized protein OS=Rosa chinensis OX=74649 GN=RchiOBHm_Chr2g0169681 PE=4 SV=1	disorder_prediction; DUF1336; EDR2_C; FAMILY NOT NAMED; FvH4_6g49660.t1_v4.0.a2;	NA	NA
IR_1950	5.74324	3.91619e-06	Fvb2:17798787-17799171	Fvb2	17800148	17802240	FvH4_2g21400	+	978	Upstream TSS	-8.88382	0.00708193	AT5G44120.3 | RmlC-like cupins superfamily protein | Chr5:17756460-17758246 REVERSE LENGTH=472 | 201606; PREDICTED: 12S seed storage protein CRA1-like [Fragaria vesca subsp. vesca]; sp|A0A1L6K371|JUGN4_JUGNI 11S globulin OS=Juglans nigra OX=16719 PE=1 SV=1; tr|A0A2P6PV78|A0A2P6PV78_ROSCH Putative 11-S seed storage protein, plant OS=Rosa chinensis OX=74649 GN=RchiOBHm_Chr6g0288001 PE=4 SV=1	11SGLOBULIN; 11S_seedstore_pln; Cupin_1; disorder_prediction; FAMILY NOT NAMED; FvH4_2g21400.t1_v4.0.a2; nutrient reservoir activity; RmlC_Cupin_sf; RmlC-like cupins; RmlC-like_jellyroll;	nutrient reservoir activity	GO:0045735
IR_1950	5.74324	3.91619e-06	Fvb2:17798787-17799171	Fvb2	17794848	17796973	FvH4_2g21390	+	1814	Downstream TTS	-20.8156	3.52623e-10	AT5G44120.3 | RmlC-like cupins superfamily protein | Chr5:17756460-17758246 REVERSE LENGTH=472 | 201606; PREDICTED: cruciferin PGCRURSE5-like [Fragaria vesca subsp. vesca]; sp|A0A1L6K371|JUGN4_JUGNI 11S globulin OS=Juglans nigra OX=16719 PE=1 SV=1; tr|A0A2P6PV77|A0A2P6PV77_ROSCH Putative 11-S seed storage protein, plant OS=Rosa chinensis OX=74649 GN=RchiOBHm_Chr6g0287991 PE=4 SV=1	11SGLOBULIN; 11S_seedstore_pln; Cupin_1; disorder_prediction; FAMILY NOT NAMED; FvH4_2g21390.t1_v4.0.a2; nutrient reservoir activity; RmlC_Cupin_sf; RmlC-like cupins; RmlC-like_jellyroll;	nutrient reservoir activity	GO:0045735
IR_3073	5.82062	0.0354292	Fvb3:17405357-17405613	Fvb3	17401973	17404612	FvH4_3g24320	+	745	Downstream TTS	3.93788	7.83382e-06	AT1G28580.1 | GDSL-like Lipase/Acylhydrolase superfamily protein | Chr1:10044603-10046379 REVERSE LENGTH=390 | 201606; PREDICTED: GDSL esterase/lipase At1g28580-like [Fragaria vesca subsp. vesca]; sp|Q9FXJ2|GDL7_ARATH GDSL esterase/lipase At1g28580 OS=Arabidopsis thaliana OX=3702 GN=At1g28580 PE=2 SV=1; tr|A0A2P6Q4L4|A0A2P6Q4L4_ROSCH Putative sinapine esterase OS=Rosa chinensis OX=74649 GN=RchiOB…	FvH4_3g24320.t1_v4.0.a2; GDSL; hydrolase activity, acting on ester bonds; Lipase_GDSL; PROKAR_LIPOPROTEIN; SGNH hydrolase; SGNH_hydro_sf; SGNH_plant_lipase-like; SGNH_plant_lipase_like; ; ZINC FINGER FYVE DOMAIN CONTAINING PROTEIN	hydrolase activity, acting on ester bonds	GO:0016788
IR_6471	8.16963	0.0308745	Fvb5:23721489-23721877	Fvb5	23723844	23726660	FvH4_5g32850	+	1968	Upstream TSS	NA	NA	AT1G71692.1 | AGAMOUS-like 12 | Chr1:26952903-26954939 REVERSE LENGTH=211 | 201606; PREDICTED: agamous-like MADS-box protein AGL12 [Fragaria vesca subsp. vesca]; sp|Q38841|AGL12_ARATH Agamous-like MADS-box protein AGL12 OS=Arabidopsis thaliana OX=3702 GN=AGL12 PE=1 SV=2; tr|M5Y0Z5|M5Y0Z5_PRUPE Uncharacterized protein OS=Prunus persica OX=3760 GN=PRUPE_1G548000 PE=4 SV=1	DNA binding; DNA-binding transcription factor activity; FvH4_5g32850.t1_v4.0.a2; K-box; K_BOX; MADS_BOX_1; MADS_BOX_2; MADS BOX PROTEIN; MADSDOMAIN; MADS_MEF2-like; MADS_MEF2_like; Myogenesis; nucleus; positive regulation of transcription by RNA polymerase II; protein dimerization activity; regulation of transcription, DNA-templated; RNA polymerase II regulatory region sequence-specific DNA bindi…	DNA binding; DNA-binding transcription factor activity; nucleus; positive regulation of transcription by RNA polymerase II; protein dimerization activity; regulation of DNA-templated transcription; RNA polymerase II transcription regulatory region sequence-specific DNA binding	GO:0000977; GO:0003677; GO:0003700; GO:0005634; GO:0006355; GO:0045944; GO:0046983
IR_1162	9.34862	4.79424e-06	Fvb2:3158248-3158647	Fvb2	3161073	3163272	FvH4_2g04030	+	2427	Upstream TSS	NA	NA	AT5G41980.1 | nuclease | Chr5:16793765-16794889 FORWARD LENGTH=374 | 201606; PREDICTED: uncharacterized protein LOC103943817 [Pyrus x bretschneideri]; sp|Q9M2U3|ALPL_ARATH Protein ALP1-like OS=Arabidopsis thaliana OX=3702 GN=At3g55350 PE=2 SV=1; tr|A0A2N9HMW2|A0A2N9HMW2_FAGSY Uncharacterized protein OS=Fagus sylvatica OX=28930 GN=FSB_LOCUS40922 PE=4 SV=1	DDE_Tnp_4; FvH4_2g04030.t1_v4.0.a2; HARBI1_dom; ; UNCHARACTERIZED	NA	NA
IR_1162	9.34862	4.79424e-06	Fvb2:3158248-3158647	Fvb2	3154323	3155597	FvH4_2g04020	+	2651	Downstream TTS	1.97366	1.31319e-09	AT1G66520.1 | formyltransferase | Chr1:24816330-24818693 REVERSE LENGTH=355 | 201606; PREDICTED: methionyl-tRNA formyltransferase, mitochondrial [Fragaria vesca subsp. vesca]; sp|Q65JS5|FMT_BACLD Methionyl-tRNA formyltransferase OS=Bacillus licheniformis (strain ATCC 14580 / DSM 13 / JCM 2505 / NBRC 12200 / NCIMB 9375 / NRRL NRS-1264 / Gibson 46) OX=279010 GN=fmt PE=3 SV=1; tr|A0A2P6RGS4|A0A2P6RG…	Aminoacyl-tRNA biosynthesis; biosynthetic process; catalytic activity; conversion of methionyl-tRNA to N-formyl-methionyl-tRNA; Fmt; FMT_core_Met-tRNA-FMT_N; FMT C-terminal domain-like; Formyl_trans; Formyl_trans_C; Formyl_trans_C_sf; Formyltransferase; Formyl_transferase-like_C_sf; Formyl_transf_N; Formyl_transf_N_sf; Formyl_trans_N; FvH4_2g04020.t1_v4.0.a2; hydroxymethyl-, formyl- and related t…	biosynthetic process; catalytic activity; conversion of methionyl-tRNA to N-formyl-methionyl-tRNA; hydroxymethyl-, formyl- and related transferase activity; methionyl-tRNA formyltransferase activity	GO:0003824; GO:0004479; GO:0009058; GO:0016742; GO:0071951
IR_2708	9.99249	1.95417e-05	Fvb3:9789946-9790317	Fvb3	9778739	9789368	FvH4_3g15600	+	578	Downstream TTS	0.0874428	0.91757	AT1G16540.1 | molybdenum cofactor sulfurase (LOS5) (ABA3) | Chr1:5659465-5665201 FORWARD LENGTH=819 | 201606; PREDICTED: molybdenum cofactor sulfurase isoform X1 [Fragaria vesca subsp. vesca]; sp|Q8LGM7|MOCOS_SOLLC Molybdenum cofactor sulfurase OS=Solanum lycopersicum OX=4081 GN=FLACCA PE=2 SV=1; tr|A0A2P6Q8S3|A0A2P6Q8S3_ROSCH Molybdenum cofactor sulfurase OS=Rosa chinensis OX=74649 GN=RchiOBHm_C…	Aminotran_5; Aminotrans_V_dom; catalytic activity; Folate biosynthesis; FvH4_3g15600.t1_v4.0.a2; MoCF_Sase_C; MOCOS; MoCo_sulfurase; Molybdenum cofactor biosynthesis; MOLYBDENUM COFACTOR SULFURASE; molybdenum ion binding; MOLYBDOPTERIN COFACTOR SULFURASE MOSC; Mo-molybdopterin cofactor biosynthetic process; Mo-molybdopterin cofactor sulfurase activity; MOSC; MOSC_N; MOSC N-terminal domain-like; P…	catalytic activity; molybdenum ion binding; Mo-molybdopterin cofactor biosynthetic process; Mo-molybdopterin cofactor sulfurase activity; pyridoxal phosphate binding	GO:0003824; GO:0006777; GO:0008265; GO:0030151; GO:0030170

## Sheet: IRs & Genes - Ripe vs Leaf
IR_ID	log2FoldChange	padj	Coords	Gene_Chr	Gene_Start	Gene_End	Gene_ID	Gene_Strand	Distance_IR_from_Gene	Location_IR_from_Gene	log2FC_gene_RedvsLeaf	padj_gene_RedvsLeaf	BLAST	InterPro	GO Term	GO Accession
IR_2708	-9.27786	7.25938e-05	Fvb3:9789946-9790317	Fvb3	9778739	9789368	FvH4_3g15600	+	578	Downstream TTS	0.384146	0.553822	AT1G16540.1 | molybdenum cofactor sulfurase (LOS5) (ABA3) | Chr1:5659465-5665201 FORWARD LENGTH=819 | 201606; PREDICTED: molybdenum cofactor sulfurase isoform X1 [Fragaria vesca subsp. vesca]; sp|Q8LGM7|MOCOS_SOLLC Molybdenum cofactor sulfurase OS=Solanum lycopersicum OX=4081 GN=FLACCA PE=2 SV=1; tr|A0A2P6Q8S3|A0A2P6Q8S3_ROSCH Molybdenum cofactor sulfurase OS=Rosa chinensis OX=74649 GN=RchiOBHm_C…	Aminotran_5; Aminotrans_V_dom; catalytic activity; Folate biosynthesis; FvH4_3g15600.t1_v4.0.a2; MoCF_Sase_C; MOCOS; MoCo_sulfurase; Molybdenum cofactor biosynthesis; MOLYBDENUM COFACTOR SULFURASE; molybdenum ion binding; MOLYBDOPTERIN COFACTOR SULFURASE MOSC; Mo-molybdopterin cofactor biosynthetic process; Mo-molybdopterin cofactor sulfurase activity; MOSC; MOSC_N; MOSC N-terminal domain-like; P…	catalytic activity; molybdenum ion binding; Mo-molybdopterin cofactor biosynthetic process; Mo-molybdopterin cofactor sulfurase activity; pyridoxal phosphate binding	GO:0003824; GO:0006777; GO:0008265; GO:0030151; GO:0030170
IR_8220	-9.22296	2.60811e-05	Fvb6:30688434-30688855	Fvb6	30690118	30692437	FvH4_6g38782	-	1264	Downstream TTS	6.01225	5.0194e-11	AT5G51200.2 | nuclear pore complex protein (DUF3414) | Chr5:20804926-20819408 FORWARD LENGTH=1863 | 201606; putative nucleoporin Nup186/Nup192/Nup205 [Rosa chinensis]; sp|F4KBW6|NU205_ARATH Nuclear pore complex protein NUP205 OS=Arabidopsis thaliana OX=3702 GN=NUP205 PE=1 SV=1; tr|A0A2P6S0E8|A0A2P6S0E8_ROSCH Putative nucleoporin Nup186/Nup192/Nup205 OS=Rosa chinensis OX=74649 GN=RchiOBHm_Chr2g015…	Defective TPR may confer susceptibility towards thyroid papillary carcinoma (TPC); FAMILY NOT NAMED; FvH4_6g38782.t1_v4.0.a2; ISG15 antiviral mechanism; NEP/NS2 Interacts with the Cellular Export Machinery; NS1 Mediated Effects on Host Pathways; Nuclear import of Rev protein; nuclear pore; Nuclear Pore Complex (NPC) Disassembly; NUCLEAR PORE COMPLEX PROTEIN NUP205; Nup186/Nup192/Nup205; Nup192; R…	nuclear pore	GO:0005643
IR_2053	-8.59746	0.00202712	Fvb2:20328154-20328615	Fvb2	20325509	20326349	FvH4_2g25004	-	1805	Upstream TSS	NA	NA	AT5G22870.1 | Late embryogenesis abundant (LEA) hydroxyproline-rich glycoprotein family | Chr5:7647056-7647679 REVERSE LENGTH=207 | 201606; PREDICTED: uncharacterized protein LOC101313760 [Fragaria vesca subsp. vesca]; tr|A0A2P6RCI1|A0A2P6RCI1_ROSCH Uncharacterized protein OS=Rosa chinensis OX=74649 GN=RchiOBHm_Chr3g0475711 PE=4 SV=1	FAMILY NOT NAMED; FvH4_2g25004.t1_v4.0.a2; ""> <signature-library-release library=	NA	NA
IR_2053	-8.59746	0.00202712	Fvb2:20328154-20328615	Fvb2	20329354	20329621	FvH4_2g25020	+	740	Upstream TSS	NA	NA	AT5G20600.1 | ribosomal RNA processing-like protein | Chr5:6966345-6967943 REVERSE LENGTH=532 | 201606; PREDICTED: ribosomal RNA processing protein 1 homolog [Fragaria vesca subsp. vesca]; sp|Q9Y7M6|RRP1_SCHPO Ribosomal RNA-processing protein 1 homolog OS=Schizosaccharomyces pombe (strain 972 / ATCC 24843) OX=284812 GN=SPBC9B6.07 PE=3 SV=1; tr|A0A2P6QSB6|A0A2P6QSB6_ROSCH Putative nucleolar, Nop52…	FvH4_2g25020.t1_v4.0.a2; NNP-1 PROTEIN NOVEL NUCLEAR PROTEIN 1 NOP52; Nop52; preribosome, small subunit precursor; rRNA processing	preribosome, small subunit precursor; rRNA processing	GO:0006364; GO:0030688
IR_2053	-8.59746	0.00202712	Fvb2:20328154-20328615	Fvb2	20330529	20335520	FvH4_2g25030	+	1915	Upstream TSS	-0.337241	0.399153	AT4G03200.1 | catalytics | Chr4:1408296-1412566 FORWARD LENGTH=818 | 201606; PREDICTED: spermatogenesis-associated protein 20 [Fragaria vesca subsp. vesca]; sp|Q8TB22|SPT20_HUMAN Spermatogenesis-associated protein 20 OS=Homo sapiens OX=9606 GN=SPATA20 PE=2 SV=3; tr|A0A2P6PWI0|A0A2P6PWI0_ROSCH Putative spermatogenesis-associated protein OS=Rosa chinensis OX=74649 GN=RchiOBHm_Chr6g0293001 PE=4 SV=1	6-hairpin_glycosidase_sf; 6hp_glycosidase-like_sf; catalytic activity; disorder_prediction; DUF255; FAMILY NOT NAMED; FvH4_2g25030.t1_v4.0.a2; Six-hairpin glycosidases; Ssp411; SSP411; Thioredox_DsbH; Thioredoxin-like; Thioredoxin-like_sf; UCP006402_thioredoxin	catalytic activity	GO:0003824
IR_6054	-7.48199	0.00489459	Fvb5:14800287-14800689	Fvb5	14795185	14798023	FvH4_5g23460	-	2264	Upstream TSS	-1.03185	0.658757	AT3G07040.1 | NB-ARC domain-containing disease resistance protein | Chr3:2226244-2229024 REVERSE LENGTH=926 | 201606; PREDICTED: disease resistance protein RPM1-like [Fragaria vesca subsp. vesca]; sp|Q39214|RPM1_ARATH Disease resistance protein RPM1 OS=Arabidopsis thaliana OX=3702 GN=RPM1 PE=1 SV=1; tr|A0A2P6PAT4|A0A2P6PAT4_ROSCH Putative P-loop containing nucleoside triphosphate hydrolase, leuci…	Activation of caspases through apoptosome-mediated cleavage; ADP binding; Coil; DISEASERSIST; Formation of apoptosome; FvH4_5g23460.t1_v4.0.a2; L domain-like; LEUCINE-RICH REPEAT-CONTAINING PROTEIN; LRR_dom_sf; NB-ARC; Neutrophil degranulation; P-loop containing nucleoside triphosphate hydrolases; P-loop_NTPase; Regulation of the apoptosome activity; RX-CC_like; RX-like_CC; Rx_N; ""> <signature-l…	ADP binding	GO:0043531
IR_6054	-7.48199	0.00489459	Fvb5:14800287-14800689	Fvb5	14802345	14805192	FvH4_5g23470	-	1657	Downstream TTS	-3.56522	4.65607e-06	AT3G07040.1 | NB-ARC domain-containing disease resistance protein | Chr3:2226244-2229024 REVERSE LENGTH=926 | 201606; PREDICTED: disease resistance protein RPM1-like [Fragaria vesca subsp. vesca] &gt;gi|764590007|ref|XP_011465086.1| PREDICTED: disease resistance protein RPM1-like [Fragaria vesca subsp. vesca]; sp|Q39214|RPM1_ARATH Disease resistance protein RPM1 OS=Arabidopsis thaliana OX=3702 GN…	Activation of caspases through apoptosome-mediated cleavage; ADP binding; DISEASERSIST; Formation of apoptosome; FvH4_5g23470.t1_v4.0.a2; L domain-like; LEUCINE-RICH REPEAT-CONTAINING PROTEIN; LRR_dom_sf; NB-ARC; Neutrophil degranulation; P-loop containing nucleoside triphosphate hydrolases; P-loop_NTPase; Regulation of the apoptosome activity; RX-CC_like; RX-like_CC; Rx_N; ""> <signature-library…	ADP binding	GO:0043531
IR_710	-7.3815	0.00723207	Fvb1:17400767-17401200	Fvb1	17395918	17399936	FvH4_1g25602	-	831	Upstream TSS	-6.33204	0.00210183	NA	FvH4_1g25602.t1_v4.0.a2	NA	NA
IR_4289	-7.37096	0.00991753	Fvb4:3856147-3856426	Fvb4	3853049	3855264	FvH4_4g04510	+	883	Downstream TTS	NA	NA	AT5G18280.1 | apyrase 2 | Chr5:6050799-6054023 REVERSE LENGTH=472 | 201606; PREDICTED: probable apyrase 1 [Fragaria vesca subsp. vesca]; sp|Q9SPM5|APY2_ARATH Apyrase 2 OS=Arabidopsis thaliana OX=3702 GN=APY2 PE=1 SV=1; tr|A0A2P6R553|A0A2P6R553_ROSCH Putative apyrase OS=Rosa chinensis OX=74649 GN=RchiOBHm_Chr3g0448171 PE=3 SV=1	ADENOSINE/GUANOSINE DIPHOSPHATASE; APYRASE 2; FvH4_4g04510.t1_v4.0.a2; GDA1_CD39; GDA1_CD39_NTPase; hydrolase activity; Phosphate bond hydrolysis by NTPDase proteins	hydrolase activity	GO:0016787
IR_8250	-7.1163	0.00503145	Fvb6:31121732-31122151	Fvb6	31122687	31125473	FvH4_6g39370	+	537	Upstream TSS	0.0568756	0.91489	NA	FvH4_6g39370.t1_v4.0.a2	NA	NA
IR_8250	-7.1163	0.00503145	Fvb6:31121732-31122151	Fvb6	31123666	31125126	FvH4_6g39371	+	1516	Upstream TSS	NA	NA	PREDICTED: uncharacterized protein LOC101310721 isoform X1 [Fragaria vesca subsp. vesca] &gt;gi|764612387|ref|XP_011467682.1| PREDICTED: uncharacterized protein LOC101310721 isoform X1 [Fragaria vesca subsp. vesca]; tr|A0A2P6RT39|A0A2P6RT39_ROSCH Putative F-box domain-containing protein OS=Rosa chinensis OX=74649 GN=RchiOBHm_Chr2g0123691 PE=4 SV=1	FAMILY NOT NAMED; F-box; F-box_dom; F-box domain; F-box-like_dom_sf; FvH4_6g39371.t1_v4.0.a2; protein binding; ""> <signature-library-release library=	protein binding	GO:0005515
IR_8250	-7.1163	0.00503145	Fvb6:31121732-31122151	Fvb6	31117888	31119052	FvH4_6g39361	+	2680	Downstream TTS	-0.163918	0.899205	putative chromatin remodeling &amp; transcriptional activation CHROMO-DOMAIN family [Rosa chinensis]; tr|A0A2P6RNE4|A0A2P6RNE4_ROSCH Putative chromatin remodeling &amp; transcriptional activation CHROMO-DOMAIN family OS=Rosa chinensis OX=74649 GN=RchiOBHm_Chr2g0105341 PE=4 SV=1	disorder_prediction; FvH4_6g39361.t1_v4.0.a2	NA	NA
IR_8250	-7.1163	0.00503145	Fvb6:31121732-31122151	Fvb6	31120268	31121435	FvH4_6g39362	+	297	Downstream TTS	0.384198	0.541279	AT1G12930.1 | ARM repeat superfamily protein | Chr1:4398588-4405495 REVERSE LENGTH=1005 | 201606; tr|D7SVD3|D7SVD3_VITVI Uncharacterized protein OS=Vitis vinifera OX=29760 GN=VIT_14s0068g00630 PE=4 SV=1	FvH4_6g39362.t1_v4.0.a2	NA	NA
IR_1624	-7.06695	0.0189188	Fvb2:12143425-12143880	Fvb2	12137361	12141318	FvH4_2g13860	-	2107	Upstream TSS	-0.532663	0.113759	AT1G21200.2 | sequence-specific DNA binding transcription factor | Chr1:7421483-7422814 FORWARD LENGTH=443 | 201606; PREDICTED: uncharacterized protein LOC101296534 [Fragaria vesca subsp. vesca]; tr|A0A2P6PS33|A0A2P6PS33_ROSCH Putative transcription factor Trihelix family OS=Rosa chinensis OX=74649 GN=RchiOBHm_Chr6g0275551 PE=4 SV=1	Coil; disorder_prediction; FAMILY NOT NAMED; FvH4_2g13860.t1_v4.0.a2; Myb_DNA-bind_4; TRANSCRIPTION FACTOR	NA	NA
IR_1624	-7.06695	0.0189188	Fvb2:12143425-12143880	Fvb2	12145879	12150043	FvH4_2g13861	+	2000	Upstream TSS	0.398256	0.412022	AT1G76860.1 | Small nuclear ribonucleoprotein family protein | Chr1:28854594-28855637 REVERSE LENGTH=98 | 201606; PREDICTED: sm-like protein LSM3B [Fragaria vesca subsp. vesca] &gt;gi|1366019269|ref|XP_024162124.1| sm-like protein LSM3B [Rosa chinensis] &gt;gi|1358150244|gb|PRQ24723.1| putative sm-like protein Lsm3 [Rosa chinensis]; sp|Q9C6K5|LSM3B_ARATH Sm-like protein LSM3B OS=Arabidopsis thali…	FvH4_2g13861.t1_v4.0.a2; LSM; Lsm3; LSm3; LSM_dom_euk/arc; LSM_dom_sf; mRNA decay by 5' to 3' exoribonuclease; mRNA Splicing - Major Pathway; mRNA splicing, via spliceosome; nuclear-transcribed mRNA catabolic process; RNA binding; ""> <signature-library-release library=; Sm-like_LSM3; Sm-like ribonucleoproteins; U6 SNRNA-ASSOCIATED SM-LIKE PROTEIN LSM3	mRNA splicing, via spliceosome; nuclear-transcribed mRNA catabolic process; RNA binding	GO:0000398; GO:0000956; GO:0003723
IR_5755	-7.02124	0.0158066	Fvb5:8315935-8316337	Fvb5	8312985	8314711	FvH4_5g14660	-	1224	Upstream TSS	NA	NA	AT3G01140.2 | myb domain protein 106 | Chr3:46619-47905 REVERSE LENGTH=345 | 201606; PREDICTED: myb-related protein Myb4-like [Fragaria vesca subsp. vesca]; sp|Q9LE63|MY106_ARATH Transcription factor MYB106 OS=Arabidopsis thaliana OX=3702 GN=MYB106 PE=2 SV=1; tr|A0A2P6P2T8|A0A2P6P2T8_ROSCH Putative transcription factor MYB-HB-like family OS=Rosa chinensis OX=74649 GN=RchiOBHm_Chr7g0181801 PE=4 SV…	DNA binding; FvH4_5g14660.t1_v4.0.a2; Homeobox-like_sf; Homeodomain-like; HTH_MYB; Myb_DNA-binding; Myb_dom; MYB-LIKE DNA-BINDING PROTEIN MYB; Myb-like_TF; SANT; SANT/Myb; ""> <signature-library-release library=	DNA binding	GO:0003677
IR_8863	-6.3102	0.0306144	Fvb7:7703571-7703970	Fvb7	7704674	7708187	FvH4_7g07801	+	705	Upstream TSS	1.04308	0.000883656	AT1G75400.1 | RING/U-box superfamily protein | Chr1:28297609-28299464 FORWARD LENGTH=455 | 201606; PREDICTED: uncharacterized protein LOC101306670 [Fragaria vesca subsp. vesca]; tr|A0A2P6QDU3|A0A2P6QDU3_ROSCH Putative transcription factor C2H2 family OS=Rosa chinensis OX=74649 GN=RchiOBHm_Chr5g0045191 PE=4 SV=1	NA	NA	NA
IR_8782	-6.25368	0.0196522	Fvb7:5269594-5270033	Fvb7	5272145	5278379	FvH4_7g04850	-	2113	Downstream TTS	0.126708	0.677275	AT3G56850.1 | ABA-responsive element binding protein 3 | Chr3:21046554-21047894 REVERSE LENGTH=297 | 201606; PREDICTED: ABSCISIC ACID-INSENSITIVE 5-like protein 2 isoform X2 [Fragaria vesca subsp. vesca]; sp|Q9LES3|AI5L2_ARATH ABSCISIC ACID-INSENSITIVE 5-like protein 2 OS=Arabidopsis thaliana OX=3702 GN=DPBF3 PE=1 SV=1; tr|A0A2P6SBC6|A0A2P6SBC6_ROSCH Putative transcription factor bZIP family OS=R…	NA	NA	NA
IR_706	-6.14816	3.37072e-05	Fvb1:17337963-17338253	Fvb1	17340871	17343430	FvH4_1g25560	+	2619	Upstream TSS	-3.61792	0.0696341	AT2G01210.1 | Leucine-rich repeat protein kinase family protein | Chr2:119509-121734 REVERSE LENGTH=716 | 201606; PREDICTED: probable inactive leucine-rich repeat receptor-like protein kinase At1g66830 [Fragaria vesca subsp. vesca] &gt;gi|764642826|ref|XP_011471029.1| PREDICTED: probable inactive leucine-rich repeat receptor-like protein kinase At1g66830 [Fragaria vesca subsp. vesca]; sp|Q9ZU46|Z…	NA	NA	NA
IR_706	-6.14816	3.37072e-05	Fvb1:17337963-17338253	Fvb1	17333827	17337058	FvH4_1g25551	+	905	Downstream TTS	-4.0928	6.92879e-11	AT1G66840.2 | PLASTID MOVEMENT IMPAIRED protein (DUF827) | Chr1:24933998-24936116 REVERSE LENGTH=607 | 201606; PREDICTED: protein PLASTID MOVEMENT IMPAIRED 2 [Fragaria vesca subsp. vesca] &gt;gi|764642819|ref|XP_011471028.1| PREDICTED: protein PLASTID MOVEMENT IMPAIRED 2 [Fragaria vesca subsp. vesca]; sp|Q9C9N6|PMI2_ARATH Protein PLASTID MOVEMENT IMPAIRED 2 OS=Arabidopsis thaliana OX=3702 GN=PMI2…	NA	NA	NA
IR_5059	-5.97503	0.0470071	Fvb4:23378341-23378766	Fvb4	23373721	23376237	FvH4_4g19880	+	2104	Downstream TTS	1.36106	0.001564	AT4G16210.1 | enoyl-CoA hydratase/isomerase A | Chr4:9176864-9177978 REVERSE LENGTH=265 | 201606; PREDICTED: probable enoyl-CoA hydratase, mitochondrial [Fragaria vesca subsp. vesca]; sp|Q6NL24|ECH1P_ARATH Probable enoyl-CoA hydratase 1, peroxisomal OS=Arabidopsis thaliana OX=3702 GN=ECHIA PE=1 SV=1; tr|A0A2P6QZ44|A0A2P6QZ44_ROSCH Putative short-chain-enoyl-CoA hydratase OS=Rosa chinensis OX=7464…	catalytic activity; ClpP/crotonase; ClpP/crotonase-like_dom_sf; crotonase-like; ECH_1; Enoyl-CoA_hydra/iso; FAMILY NOT NAMED; FvH4_4g19880.t1_v4.0.a2	catalytic activity	GO:0003824
IR_5059	-5.97503	0.0470071	Fvb4:23378341-23378766	Fvb4	23377668	23378141	FvH4_4g19881	+	200	Downstream TTS	NA	NA	NA	FvH4_4g19881.t1_v4.0.a2	NA	NA
IR_5059	-5.97503	0.0470071	Fvb4:23378341-23378766	Fvb4	23379391	23380096	FvH4_4g19882	-	626	Downstream TTS	NA	NA	PREDICTED: glutathione S-transferase T3-like [Fragaria vesca subsp. vesca]; tr|A0A2P6PBN0|A0A2P6PBN0_ROSCH Putative No apical meristem-associated domain-containing protein OS=Rosa chinensis OX=74649 GN=RchiOBHm_Chr7g0215961 PE=4 SV=1	Coil; FAMILY NOT NAMED; FvH4_4g19882.t1_v4.0.a2; NAM-associated; NAM-associated_C; ""> <signature-library-release library=	NA	NA
IR_8035	-5.92602	0.00144842	Fvb6:26709617-26710053	Fvb6	26705129	26707151	FvH4_6g33680	-	2466	Upstream TSS	1.04333	0.166962	AT3G13780.1 | SMAD/FHA domain-containing protein | Chr3:4525108-4526214 FORWARD LENGTH=309 | 201606; PREDICTED: ABC transporter F family member 4 [Fragaria vesca subsp. vesca]; tr|A0A2P6RY55|A0A2P6RY55_ROSCH Putative transcription factor interactor and regulator FHA-SMAD family OS=Rosa chinensis OX=74649 GN=RchiOBHm_Chr2g0143591 PE=4 SV=1	disorder_prediction; FAMILY NOT NAMED; FvH4_6g33680.t1_v4.0.a2; protein binding; SMAD/FHA domain; SMAD_FHA_dom_sf	protein binding	GO:0005515
IR_8035	-5.92602	0.00144842	Fvb6:26709617-26710053	Fvb6	26712918	26713271	FvH4_6g33681	+	2866	Upstream TSS	NA	NA	NA	FvH4_6g33681.t1_v4.0.a2	NA	NA
IR_7684	-5.7711	0.00293363	Fvb6:20711579-20711986	Fvb6	20707394	20711138	FvH4_6g27031	+	441	Downstream TTS	NA	NA	NA	disorder_prediction; FvH4_6g27031.t1_v4.0.a2	NA	NA
IR_7227	-5.28792	0.00974212	Fvb6:12240704-12241124	Fvb6	12230275	12239325	FvH4_6g18481	+	1379	Downstream TTS	NA	NA	NA	FvH4_6g18481.t1_v4.0.a2	NA	NA
IR_4563	-5.20794	0.0440743	Fvb4:11637374-11637992	Fvb4	11633971	11635143	FvH4_4g09692	-	2231	Upstream TSS	NA	NA	AT3G05850.1 | MuDR family transposase | Chr3:1743537-1745943 REVERSE LENGTH=777 | 201606; PREDICTED: uncharacterized protein LOC101301632, partial [Fragaria vesca subsp. vesca]; tr|A0A2P6QNS9|A0A2P6QNS9_ROSCH Putative transposase, MuDR, plant, Zinc finger, SWIM-type, MULE transposase OS=Rosa chinensis OX=74649 GN=RchiOBHm_Chr4g0384731 PE=4 SV=1	FAMILY NOT NAMED; FvH4_4g09692.t1_v4.0.a2; MULE; MULE_transposase_dom; ""> <signature-library-release library=; ZF_SWIM; zinc ion binding; Znf_SWIM	zinc ion binding	GO:0008270
IR_9354	-5.06129	0.0266252	Fvb7:20223383-20223714	Fvb7	20226198	20227592	FvH4_7g26930	+	2485	Upstream TSS	-2.77693	0.000570483	AT5G51190.1 | Integrase-type DNA-binding superfamily protein | Chr5:20800708-20801373 REVERSE LENGTH=221 | 201606; PREDICTED: ethylene-responsive transcription factor ERF105-like [Fragaria vesca subsp. vesca]; sp|Q40478|ERF5_TOBAC Ethylene-responsive transcription factor 5 OS=Nicotiana tabacum OX=4097 GN=ERF5 PE=2 SV=1; tr|A0A2P6SM57|A0A2P6SM57_ROSCH Putative transcription factor AP2-EREBP family…	NA	NA	NA
IR_6937	-4.93454	0.0387993	Fvb6:5925749-5926137	Fvb6	5928648	5929566	FvH4_6g09980	-	2512	Downstream TTS	-2.52389	0.00143917	AT5G59320.1 | lipid transfer protein 3 | Chr5:23929051-23929492 FORWARD LENGTH=115 | 201606; PREDICTED: non-specific lipid-transfer protein 1-like isoform X1 [Fragaria vesca subsp. vesca]; sp|Q9M5X8|NLTP_PRUAV Non-specific lipid-transfer protein OS=Prunus avium OX=42229 PE=1 SV=1; tr|Q0Z8V0|Q0Z8V0_RUBID Non-specific lipid-transfer protein OS=Rubus idaeus OX=32247 PE=2 SV=1	Bifunc_inhib/LTP/seed_store; Bifunctional inhibitor/lipid-transfer protein/seed storage 2S albumin; Bifun_inhib/LTP/seed_sf; FAMILY NOT NAMED; FvH4_6g09980.t1_v4.0.a2; lipid binding; lipid transport; LIPIDTRNSFER; NON-SPECIFIC LIPID-TRANSFER PROTEIN 11; nsLTP1; Plant_LTP; PLANT_LTP; Tryp_alpha_amyl	lipid binding; lipid transport	GO:0006869; GO:0008289
IR_652	-4.79917	0.000819907	Fvb1:16492281-16492712	Fvb1	16495084	16495447	FvH4_1g24680	+	2373	Upstream TSS	NA	NA	AT4G30770.1 | Putative membrane lipoprotein | Chr4:14986140-14986613 REVERSE LENGTH=157 | 201606; hypothetical protein RchiOBHm_Chr2g0122171 [Rosa chinensis]; tr|A0A2P6RSQ1|A0A2P6RSQ1_ROSCH Uncharacterized protein OS=Rosa chinensis OX=74649 GN=RchiOBHm_Chr2g0122171 PE=4 SV=1	FAMILY NOT NAMED; FvH4_1g24680.t1_v4.0.a2; MEMBRANE LIPOPROTEIN-RELATED; PROKAR_LIPOPROTEIN	NA	NA
IR_1950	-4.7948	0.00014637	Fvb2:17798787-17799171	Fvb2	17800148	17802240	FvH4_2g21400	+	978	Upstream TSS	9.21121	0.00356984	AT5G44120.3 | RmlC-like cupins superfamily protein | Chr5:17756460-17758246 REVERSE LENGTH=472 | 201606; PREDICTED: 12S seed storage protein CRA1-like [Fragaria vesca subsp. vesca]; sp|A0A1L6K371|JUGN4_JUGNI 11S globulin OS=Juglans nigra OX=16719 PE=1 SV=1; tr|A0A2P6PV78|A0A2P6PV78_ROSCH Putative 11-S seed storage protein, plant OS=Rosa chinensis OX=74649 GN=RchiOBHm_Chr6g0288001 PE=4 SV=1	NA	NA	NA
IR_1950	-4.7948	0.00014637	Fvb2:17798787-17799171	Fvb2	17794848	17796973	FvH4_2g21390	+	1814	Downstream TTS	21.2009	7.73602e-11	AT5G44120.3 | RmlC-like cupins superfamily protein | Chr5:17756460-17758246 REVERSE LENGTH=472 | 201606; PREDICTED: cruciferin PGCRURSE5-like [Fragaria vesca subsp. vesca]; sp|A0A1L6K371|JUGN4_JUGNI 11S globulin OS=Juglans nigra OX=16719 PE=1 SV=1; tr|A0A2P6PV77|A0A2P6PV77_ROSCH Putative 11-S seed storage protein, plant OS=Rosa chinensis OX=74649 GN=RchiOBHm_Chr6g0287991 PE=4 SV=1	NA	NA	NA
IR_87	-4.55404	0.00519514	Fvb1:2743595-2744013	Fvb1	2744919	2754520	FvH4_1g05170	+	907	Upstream TSS	0.346863	0.346237	AT1G52360.3 | Coatomer%2C beta' subunit | Chr1:19499282-19505718 FORWARD LENGTH=922 | 201606; PREDICTED: coatomer subunit beta'-3-like [Fragaria vesca subsp. vesca]; sp|Q5VQ78|COB21_ORYSJ Coatomer subunit beta'-1 OS=Oryza sativa subsp. japonica OX=39947 GN=Os06g0143900 PE=2 SV=1; tr|A0A2P6RJJ3|A0A2P6RJJ3_ROSCH Coatomer subunit beta' OS=Rosa chinensis OX=74649 GN=RchiOBHm_Chr2g0090881 PE=3 SV=1	Beta'-COP; COATOMER; Coatomer_WDAD; Coatomer_WD-assoc_reg; COPB2; COPI-dependent Golgi-to-ER retrograde traffic; COPI-mediated anterograde transport; C-terminal (heme d1) domain of cytochrome cd1-nitrite reductase; disorder_prediction; FvH4_1g05170.t1_v4.0.a2; FvH4_1g05170.t2_v4.0.a2; G-protein_beta_WD-40_rep; GPROTEINBRPT; Haem_d1_sf; intracellular protein transport; membrane coat; protein bindi…	intracellular protein transport; membrane coat; protein binding; structural molecule activity; vesicle-mediated transport	GO:0005198; GO:0005515; GO:0006886; GO:0016192; GO:0030117
IR_87	-4.55404	0.00519514	Fvb1:2743595-2744013	Fvb1	2739422	2743170	FvH4_1g05160	+	425	Downstream TTS	NA	NA	AT5G19600.1 | sulfate transporter 3%3B5 | Chr5:6613113-6616891 REVERSE LENGTH=634 | 201606; PREDICTED: probable sulfate transporter 3.5 [Fragaria vesca subsp. vesca]; sp|Q94LW6|SUT35_ARATH Probable sulfate transporter 3.5 OS=Arabidopsis thaliana OX=3702 GN=SULTR3;5 PE=2 SV=1; tr|A0A2P6RJL9|A0A2P6RJL9_ROSCH Putative SLC26A/SulP transporter OS=Rosa chinensis OX=74649 GN=RchiOBHm_Chr2g0090861 PE=3 S…	FvH4_1g05160.t1_v4.0.a2; integral component of membrane; membrane; secondary active sulfate transmembrane transporter activity; SLC26A/SulP_dom; SLC26A/SulP_fam; SpoIIaa-like; STAS; STAS_dom; STAS_dom_sf; STAS_SulP_like_sulfate_transporter; Suf_transp_3.5; sulfate transmembrane transport; sulfate transmembrane transporter activity; Sulfate_transp; sulfate transport; SULFATE TRANSPORTER; SULFATE T…	integral to membrane; membrane; secondary active sulfate transmembrane transporter activity; sulfate transmembrane transporter activity; sulfate transport; transmembrane transport	GO:0008271; GO:0008272; GO:0015116; GO:0016020; GO:0016021; GO:0055085
IR_8414	-4.54717	0.0190918	Fvb6:34970371-34970864	Fvb6	34972707	34975306	FvH4_6g45600	+	1844	Upstream TSS	NA	NA	AT3G25830.1 | terpene synthase-like sequence-1%2C8-cineole | Chr3:9447545-9450316 FORWARD LENGTH=600 | 201606; PREDICTED: tricyclene synthase EBOS, chloroplastic-like [Fragaria vesca subsp. vesca]; sp|Q672F7|TPS2_LOTJA Tricyclene synthase EBOS, chloroplastic OS=Lotus japonicus OX=34305 GN=EBOS PE=1 SV=1; tr|A0A2P6REV6|A0A2P6REV6_ROSCH Putative lyase OS=Rosa chinensis OX=74649 GN=RchiOBHm_Chr3g048…	FAMILY NOT NAMED; FvH4_6g45600.t1_v4.0.a2; Isoprenoid_synthase_dom_sf; Isoprenoid_Synthase_Type_I; lyase activity; magnesium ion binding; ""> <signature-library-release library=; Terpene_cyclase-like_1_C; Terpene_Cyclase_Like_1_C_Term; Terpene_cyclase_plant_C1; Terpene_synth; terpene synthase activity; Terpene_synthase_metal-bd; Terpene_synth_C; Terpene_synth_N; Terpene_synth_N_sf; Terpenoid_cycl…	lyase activity; magnesium ion binding; terpene synthase activity	GO:0000287; GO:0010333; GO:0016829
IR_8414	-4.54717	0.0190918	Fvb6:34970371-34970864	Fvb6	34965584	34967636	FvH4_6g45590	+	2735	Downstream TTS	-9.87246	0.0785761	PREDICTED: uncharacterized protein LOC101301630 [Fragaria vesca subsp. vesca]; sp|Q66S13|NATT4_THANI Natterin-4 OS=Thalassophryne nattereri OX=289382 PE=2 SV=1; tr|A0A2P6S3E3|A0A2P6S3E3_ROSCH Putative clostridium epsilon toxin ETX/ mosquitocidal toxin MTX2, Agglutinin OS=Rosa chinensis OX=74649 GN=RchiOBHm_Chr2g0163741 PE=4 SV=1	Aerolisin/ETX pore-forming domain; Aerolysin; Aerolysn; Agglutinin; Agglutinin_dom_sf; disorder_prediction; extracellular region; FAMILY NOT NAMED; FvH4_6g45590.t1_v4.0.a2; pathogenesis; ""> <signature-library-release library=	extracellular region; obsolete pathogenesis	GO:0005576; GO:0009405
IR_8414	-4.54717	0.0190918	Fvb6:34970371-34970864	Fvb6	34969376	34970348	FvH4_6g45591	+	23	Downstream TTS	-9.4304	4.58503e-05	PREDICTED: uncharacterized protein LOC105353374 [Fragaria vesca subsp. vesca]; tr|A0A2P6S3E3|A0A2P6S3E3_ROSCH Putative clostridium epsilon toxin ETX/ mosquitocidal toxin MTX2, Agglutinin OS=Rosa chinensis OX=74649 GN=RchiOBHm_Chr2g0163741 PE=4 SV=1	Agglutinin; Agglutinin_dom_sf; disorder_prediction; FAMILY NOT NAMED; FvH4_6g45591.t1_v4.0.a2; ""> <signature-library-release library=	NA	NA
IR_5045	-4.52465	0.0429442	Fvb4:23169317-23169752	Fvb4	23170145	23170601	FvH4_4g19530	-	394	Downstream TTS	-4.42993	0.000869774	hypothetical protein RchiOBHm_Chr4g0424661 [Rosa chinensis]; tr|A0A2P6QYY5|A0A2P6QYY5_ROSCH Uncharacterized protein OS=Rosa chinensis OX=74649 GN=RchiOBHm_Chr4g0424661 PE=4 SV=1	disorder_prediction; FvH4_4g19530.t1_v4.0.a2	NA	NA
IR_5045	-4.52465	0.0429442	Fvb4:23169317-23169752	Fvb4	23171614	23172499	FvH4_4g19531	-	1863	Downstream TTS	-5.03407	0.000151003	NA	disorder_prediction; FvH4_4g19531.t1_v4.0.a2	NA	NA
IR_2095	-4.50904	0.000159731	Fvb2:21867454-21867633	Fvb2	21868179	21869781	FvH4_2g27610	+	547	Upstream TSS	4.6424	0.0771484	AT5G59670.2 | Leucine-rich repeat protein kinase family protein | Chr5:24041538-24045478 FORWARD LENGTH=868 | 201606; putative leucine-rich repeat receptor-like serine/threonine-protein kinase [Quercus suber]; sp|Q9FN94|RLK0_ARATH Receptor-like protein kinase At5g59670 OS=Arabidopsis thaliana OX=3702 GN=At5g59670 PE=1 SV=1; tr|A0A2P4MN24|A0A2P4MN24_QUESU Putative leucine-rich repeat receptor-like…	NA	NA	NA
IR_2095	-4.50904	0.000159731	Fvb2:21867454-21867633	Fvb2	21863222	21867167	FvH4_2g27592	+	287	Downstream TTS	NA	NA	PREDICTED: uncharacterized protein LOC101304350 [Fragaria vesca subsp. vesca] &gt;gi|764540208|ref|XP_011459055.1| PREDICTED: uncharacterized protein LOC101304350 [Fragaria vesca subsp. vesca]	NA	NA	NA
IR_2095	-4.50904	0.000159731	Fvb2:21867454-21867633	Fvb2	21870283	21873380	FvH4_2g27620	-	2651	Downstream TTS	-3.1335	1.04947e-26	AT1G21680.1 | DPP6 N-terminal domain-like protein | Chr1:7613028-7615148 FORWARD LENGTH=706 | 201606; PREDICTED: uncharacterized protein LOC101292474 [Fragaria vesca subsp. vesca]; sp|Q6NAR1|TOLB_RHOPA Tol-Pal system protein TolB OS=Rhodopseudomonas palustris (strain ATCC BAA-98 / CGA009) OX=258594 GN=tolB PE=3 SV=1; tr|A0A2P6PXE3|A0A2P6PXE3_ROSCH Putative transcription factor WD40-like family OS…	NA	NA	NA
IR_8481	-4.44718	2.98209e-08	Fvb6:37157053-37157471	Fvb6	37152196	37154331	FvH4_6g49640	+	2722	Downstream TTS	-1.81883	3.11088e-05	PREDICTED: uncharacterized protein LOC101309469 [Fragaria vesca subsp. vesca]; tr|A0A2P6R0N7|A0A2P6R0N7_ROSCH Putative F-box domain-containing protein OS=Rosa chinensis OX=74649 GN=RchiOBHm_Chr4g0430971 PE=4 SV=1	DUF295; FAMILY NOT NAMED; F-box; F-box_dom; F-box domain; F-box-like_dom_sf; FvH4_6g49640.t1_v4.0.a2; FvH4_6g49640.t2_v4.0.a2; protein binding; ""> <signature-library-release library=	protein binding	GO:0005515
IR_8481	-4.44718	2.98209e-08	Fvb6:37157053-37157471	Fvb6	37158218	37161537	FvH4_6g49660	-	748	Downstream TTS	-0.104315	0.873462	AT1G59650.1 | CW14 protein (DUF1336) | Chr1:21920099-21922670 FORWARD LENGTH=492 | 201606; PREDICTED: uncharacterized protein LOC101303718 [Fragaria vesca subsp. vesca]; sp|F4JSE7|EDR2_ARATH Protein ENHANCED DISEASE RESISTANCE 2 OS=Arabidopsis thaliana OX=3702 GN=EDR2 PE=2 SV=1; tr|A0A2P6S4X5|A0A2P6S4X5_ROSCH Uncharacterized protein OS=Rosa chinensis OX=74649 GN=RchiOBHm_Chr2g0169681 PE=4 SV=1	NA	NA	NA
IR_1512	-3.96361	9.56882e-06	Fvb2:10440240-10440868	Fvb2	10431326	10440151	FvH4_2g11940	+	89	Downstream TTS	1.40762	4.64563e-06	AT5G09400.1 | K+ uptake permease 7 | Chr5:2916377-2920604 FORWARD LENGTH=858 | 201606; PREDICTED: potassium transporter 7 isoform X1 [Fragaria vesca subsp. vesca]; sp|Q9FY75|POT7_ARATH Potassium transporter 7 OS=Arabidopsis thaliana OX=3702 GN=POT7 PE=1 SV=2; tr|A0A2P6PR16|A0A2P6PR16_ROSCH Potassium transporter OS=Rosa chinensis OX=74649 GN=RchiOBHm_Chr6g0271831 PE=3 SV=1	NA	NA	NA
IR_1512	-3.96361	9.56882e-06	Fvb2:10440240-10440868	Fvb2	10441923	10449283	FvH4_2g11950	-	1056	Downstream TTS	-0.693323	0.297721	AT4G09580.1 | SNARE associated Golgi protein family | Chr4:6052721-6054313 REVERSE LENGTH=287 | 201606; PREDICTED: uncharacterized membrane protein At4g09580-like [Fragaria vesca subsp. vesca] &gt;gi|764531816|ref|XP_011458415.1| PREDICTED: uncharacterized membrane protein At4g09580-like [Fragaria vesca subsp. vesca]; sp|Q8L586|Y4958_ARATH Uncharacterized membrane protein At4g09580 OS=Arabidopsis…	NA	NA	NA
IR_4016	-3.72347	0.00910305	Fvb3:36478150-36478460	Fvb3	36473796	36475577	FvH4_3g43752	-	2573	Upstream TSS	-0.516378	0.946912	putative F-box domain-containing protein [Rosa chinensis]; tr|A0A2P6RJ68|A0A2P6RJ68_ROSCH Putative F-box domain-containing protein OS=Rosa chinensis OX=74649 GN=RchiOBHm_Chr2g0089331 PE=4 SV=1	disorder_prediction; FvH4_3g43752.t1_v4.0.a2	NA	NA
IR_4016	-3.72347	0.00910305	Fvb3:36478150-36478460	Fvb3	36480264	36481155	FvH4_3g43760	+	1805	Upstream TSS	NA	NA	NA	disorder_prediction; FvH4_3g43760.t1_v4.0.a2	NA	NA
IR_4016	-3.72347	0.00910305	Fvb3:36478150-36478460	Fvb3	36475633	36477614	FvH4_3g43753	+	536	Downstream TTS	NA	NA	AT5G02820.1 | Spo11/DNA topoisomerase VI%2C subunit A protein | Chr5:642658-644123 FORWARD LENGTH=427 | 201606; PREDICTED: DNA topoisomerase 6 subunit A-like [Fragaria vesca subsp. vesca]; sp|Q9LZ03|TOP6A_ARATH DNA topoisomerase 6 subunit A OS=Arabidopsis thaliana OX=3702 GN=TOP6A PE=1 SV=1; tr|A0A2P6RIA0|A0A2P6RIA0_ROSCH Putative DNA topoisomerase (ATP-hydrolyzing) OS=Rosa chinensis OX=74649 GN=…	chromosome; Coil; disorder_prediction; DNA binding; DNA catabolic process, endonucleolytic; DNA topoisomerase IV, alpha subunit; endodeoxyribonuclease activity, producing 3'-phosphomonoesters; FvH4_3g43753.t1_v4.0.a2; Meiotic recombination; MEIOTIC RECOMBINATION PROTEIN SPO11; Spo11/TopoVI_A; Spo11/TopoVI_A_sf; TOP6AFAMILY; TOPRIM_Topo6A/Spo11; TOPRIM_TopoIIB_SPO	chromosome; DNA binding; DNA endonuclease activity, producing 3'-phosphomonoesters; obsolete DNA catabolic process, endonucleolytic	GO:0000737; GO:0003677; GO:0005694; GO:0016889
IR_4016	-3.72347	0.00910305	Fvb3:36478150-36478460	Fvb3	36481427	36483401	FvH4_3g43770	-	2968	Downstream TTS	NA	NA	putative F-box domain-containing protein [Rosa chinensis]; tr|A0A2P6RJ68|A0A2P6RJ68_ROSCH Putative F-box domain-containing protein OS=Rosa chinensis OX=74649 GN=RchiOBHm_Chr2g0089331 PE=4 SV=1	disorder_prediction; FAMILY NOT NAMED; F-box; FBOX; F-box_dom; F-box domain; F-box-like_dom_sf; FvH4_3g43770.t1_v4.0.a2; protein binding; ""> <signature-library-release library=	protein binding	GO:0005515
IR_8340	-3.53887	0.0337632	Fvb6:32959829-32960262	Fvb6	32955826	32958271	FvH4_6g42130	-	1558	Upstream TSS	NA	NA	AT1G05020.1 | ENTH/ANTH/VHS superfamily protein | Chr1:1435384-1437345 REVERSE LENGTH=653 | 201606; PREDICTED: putative clathrin assembly protein At1g03050 [Fragaria vesca subsp. vesca]; sp|Q9ZVN6|AP180_ARATH Clathrin coat assembly protein AP180 OS=Arabidopsis thaliana OX=3702 GN=AP180 PE=1 SV=1; tr|A0A2P6S1Y6|A0A2P6S1Y6_ROSCH Putative ANTH domain-containing protein OS=Rosa chinensis OX=74649 GN=…	1-phosphatidylinositol binding; ANTH; ANTH_AP180_CALM; ANTH_dom; Cargo recognition for clathrin-mediated endocytosis; Clathrin_AP_dom2; CLATHRIN ASSEMBLY PROTEIN; clathrin binding; clathrin coat assembly; CLATHRIN COAT ASSEMBLY PROTEIN AP180; clathrin-coated vesicle; Clathrin-mediated endocytosis; disorder_prediction; ENTH; ENTH_VHS; ENTH/VHS domain; FvH4_6g42130.t1_v4.0.a2; GAT-like domain; phos…	1-phosphatidylinositol binding; clathrin binding; clathrin coat assembly; clathrin-coated vesicle; phospholipid binding	GO:0005543; GO:0005545; GO:0030136; GO:0030276; GO:0048268
IR_8340	-3.53887	0.0337632	Fvb6:32959829-32960262	Fvb6	32961624	32963403	FvH4_6g42131	+	1363	Upstream TSS	-6.65113	0.256504	AT3G15850.1 | fatty acid desaturase 5 | Chr3:5359087-5360998 FORWARD LENGTH=371 | 201606; PREDICTED: palmitoyl-monogalactosyldiacylglycerol delta-7 desaturase, chloroplastic-like [Fragaria vesca subsp. vesca]; sp|Q949X0|ADS3_ARATH Palmitoyl-monogalactosyldiacylglycerol delta-7 desaturase, chloroplastic OS=Arabidopsis thaliana OX=3702 GN=ADS3 PE=1 SV=2; tr|A0A2P6S1W8|A0A2P6S1W8_ROSCH Putative acyl…	ACYL-COA DESATURASE; Acyl-CoA_DS; Delta9-FADS-like; disorder_prediction; FACDDSATRASE; FA_desaturase; FA_desaturase_dom; Fatty acyl-CoA biosynthesis; FvH4_6g42131.t1_v4.0.a2; lipid metabolic process; oxidation-reduction process; oxidoreductase activity, acting on paired donors, with oxidation of a pair of donors resulting in the reduction of molecular oxygen to two molecules of water; PALMITOYL-M…	lipid metabolic process; obsolete oxidation-reduction process; oxidoreductase activity, acting on paired donors, with oxidation of a pair of donors resulting in the reduction of molecular oxygen to two molecules of water	GO:0006629; GO:0016717; GO:0055114
IR_2592	-3.53416	0.0016618	Fvb3:6918813-6919138	Fvb3	6915613	6918313	FvH4_3g11720	-	500	Upstream TSS	-2.7565	0.676598	AT3G63010.1 | alpha/beta-Hydrolases superfamily protein | Chr3:23289717-23290998 FORWARD LENGTH=358 | 201606; PREDICTED: gibberellin receptor GID1B-like [Fragaria vesca subsp. vesca]; sp|Q9LYC1|GID1B_ARATH Gibberellin receptor GID1B OS=Arabidopsis thaliana OX=3702 GN=GID1B PE=1 SV=1; tr|A0A2P6PWD4|A0A2P6PWD4_ROSCH Putative carboxylesterase OS=Rosa chinensis OX=74649 GN=RchiOBHm_Chr6g0292241 PE=4 …	AB_hydrolase; Abhydrolase_3; AB_hydrolase_3; alpha/beta-Hydrolases; FvH4_3g11720.t1_v4.0.a2; GIBBERELLIN RECEPTOR GID1B; hydrolase activity; LIPASE_GDXG_HIS; Lipase_GDXG_HIS_AS; Lipase_GDXG_put_SER_AS; LIPASE_GDXG_SER; MEMBER OF 'GDXG' FAMILY OF LIPOLYTIC ENZYMES; Triglyceride catabolism	hydrolase activity	GO:0016787
IR_5510	-3.50486	0.0462534	Fvb5:1312101-1312690	Fvb5	1304202	1311433	FvH4_5g02090	+	668	Downstream TTS	-2.75536	0.000130131	AT1G63440.1 | heavy metal atpase 5 | Chr1:23527655-23531109 FORWARD LENGTH=995 | 201606; PREDICTED: probable copper-transporting ATPase HMA5 [Fragaria vesca subsp. vesca]; sp|Q9SH30|HMA5_ARATH Probable copper-transporting ATPase HMA5 OS=Arabidopsis thaliana OX=3702 GN=HMA5 PE=1 SV=2; tr|A0A2P6P715|A0A2P6P715_ROSCH Putative cu(2+)-exporting ATPase OS=Rosa chinensis OX=74649 GN=RchiOBHm_Chr7g019814…	ATPASE_E1_E2; ATPase_P-typ_cyto_dom_N; ATPase_P-typ_P_site; ATPase_P-typ_TM_dom_sf; ATPase_P-typ_transduc_dom_A_sf; C1.7:_P-type_atpase_like; Calcium ATPase, transduction domain A; Calcium ATPase, transmembrane domain M; CATATPASE; cation transport; cation-transporting ATPase activity; copper ion binding; CUATPASE; CUATPASEI; disorder_prediction; E1-E2_ATPase; FAMILY NOT NAMED; FvH4_5g02090.t1_v4…	ATPase-coupled monoatomic cation transmembrane transporter activity; copper ion binding; integral to membrane; metal ion binding; metal ion transport; monoatomic cation transport; nucleotide binding	GO:0000166; GO:0005507; GO:0006812; GO:0016021; GO:0019829; GO:0030001; GO:0046872
IR_515	-3.40622	0.0125234	Fvb1:13495744-13496078	Fvb1	13498952	13506721	FvH4_1g21510	-	2875	Downstream TTS	NA	NA	AT1G47710.1 | Serine protease inhibitor (SERPIN) family protein | Chr1:17558271-17560061 FORWARD LENGTH=391 | 201606; PREDICTED: serpin-ZX-like [Fragaria vesca subsp. vesca]; sp|Q9S7T8|SPZX_ARATH Serpin-ZX OS=Arabidopsis thaliana OX=3702 GN=At1g47710 PE=1 SV=1; tr|A0A2P6RSN3|A0A2P6RSN3_ROSCH Putative Serpin family protein OS=Rosa chinensis OX=74649 GN=RchiOBHm_Chr2g0122001 PE=3 SV=1	extracellular space; FvH4_1g21510.t1_v4.0.a2; RING/U-box; SERINE PROTEASE INHIBITOR, SERPIN; Serpin; SERPIN; Serpin_CS; Serpin_dom; Serpin_fam; Serpins; Serpin_sf; Serpin_sf_2; ""> <signature-library-release library=; ZF_RING_2; Znf_RING; Znf_RING/FYVE/PHD	extracellular space	GO:0005615
IR_8189	-3.39849	0.00478065	Fvb6:29854215-29854617	Fvb6	29856822	29861175	FvH4_6g37900	-	2206	Downstream TTS	0.241651	0.511032	AT1G17680.3 | tetratricopeptide repeat (TPR)-containing protein | Chr1:6076388-6082160 FORWARD LENGTH=896 | 201606; sp|Q9Y5Q9|TF3C3_HUMAN General transcription factor 3C polypeptide 3 OS=Homo sapiens OX=9606 GN=GTF3C3 PE=1 SV=1; tr|A0A2P6S029|A0A2P6S029_ROSCH Putative acetyltransferase A, auxiliary subunit OS=Rosa chinensis OX=74649 GN=RchiOBHm_Chr2g0151101 PE=4 SV=1; transcription factor tau sub…	Coil; disorder_prediction; FvH4_6g37900.t1_v4.0.a2; FvH4_6g37900.t2_v4.0.a2; FvH4_6g37900.t4_v4.0.a2; FvH4_6g37900.t5_v4.0.a2; protein binding; RNA Polymerase III Abortive And Retractive Initiation; RNA Polymerase III Transcription Initiation From Type 1 Promoter; RNA Polymerase III Transcription Initiation From Type 2 Promoter; RNA polymerase III transcription regulator recruiting activity; Tfc4…	obsolete RNA polymerase III transcription regulator recruiting activity; protein binding; transcription by RNA polymerase III	GO:0001004; GO:0005515; GO:0006383
IR_8473	-3.37811	0.0440743	Fvb6:36977863-36978131	Fvb6	36980373	36981614	FvH4_6g49330	+	2243	Upstream TSS	NA	NA	NA	disorder_prediction; FvH4_6g49330.t1_v4.0.a2	NA	NA
IR_8473	-3.37811	0.0440743	Fvb6:36977863-36978131	Fvb6	36979787	36980309	FvH4_6g49320	-	1657	Downstream TTS	-4.54272	1.18638e-06	hypothetical protein RchiOBHm_Chr2g0169181 [Rosa chinensis]; tr|A0A2P6S4S2|A0A2P6S4S2_ROSCH Uncharacterized protein OS=Rosa chinensis OX=74649 GN=RchiOBHm_Chr2g0169181 PE=4 SV=1	FAMILY NOT NAMED; FvH4_6g49320.t1_v4.0.a2; ""> <signature-library-release library=	NA	NA
IR_2155	-3.20804	0.00012313	Fvb2:23374133-23374509	Fvb2	23367834	23373495	FvH4_2g30220	+	638	Downstream TTS	-3.65469	0.0432465	AT4G13350.2 | NSP (nuclear shuttle protein)-interacting GTPase | Chr4:7770170-7773321 REVERSE LENGTH=602 | 201606; PREDICTED: uncharacterized protein LOC105349887 [Fragaria vesca subsp. vesca]; sp|Q8RXE7|AGD14_ARATH Probable ADP-ribosylation factor GTPase-activating protein AGD14 OS=Arabidopsis thaliana OX=3702 GN=AGD14 PE=1 SV=2; tr|A0A2P6Q1Q5|A0A2P6Q1Q5_ROSCH Putative Arf GTPase activating prot…	NA	NA	NA
IR_2155	-3.20804	0.00012313	Fvb2:23374133-23374509	Fvb2	23377300	23378665	FvH4_2g30230	-	2792	Downstream TTS	6.27769	2.04276e-17	AT2G25680.1 | molybdate transporter 1 | Chr2:10933167-10934537 REVERSE LENGTH=456 | 201606; PREDICTED: molybdate transporter 1 [Fragaria vesca subsp. vesca]; sp|Q9SL95|MOT1_ARATH Molybdate transporter 1 OS=Arabidopsis thaliana OX=3702 GN=MOT1 PE=1 SV=1; tr|A0A2P6Q1T1|A0A2P6Q1T1_ROSCH Putative molybdate transporter 1/2 OS=Rosa chinensis OX=74649 GN=RchiOBHm_Chr6g0312651 PE=4 SV=1	NA	NA	NA
IR_5993	-3.12959	7.00922e-05	Fvb5:13365820-13366228	Fvb5	13368134	13368527	FvH4_5g21990	-	1907	Downstream TTS	1.4798	0.19684	AT2G35290.1 | hypothetical protein | Chr2:14861635-14862000 REVERSE LENGTH=121 | 201606; PREDICTED: uncharacterized protein LOC101309055 [Fragaria vesca subsp. vesca]; tr|A0A2P6P9Z0|A0A2P6P9Z0_ROSCH Uncharacterized protein OS=Rosa chinensis OX=74649 GN=RchiOBHm_Chr7g0209491 PE=4 SV=1	FAMILY NOT NAMED; FvH4_5g21990.t1_v4.0.a2; ""> <signature-library-release library=	NA	NA
IR_93	-2.92786	0.0184225	Fvb1:3135252-3135630	Fvb1	3137000	3137414	FvH4_1g05892	+	1371	Upstream TSS	NA	NA	tr|A0A2P6RVR3|A0A2P6RVR3_ROSCH Putative F-box domain-containing protein OS=Rosa chinensis OX=74649 GN=RchiOBHm_Chr2g0133991 PE=4 SV=1	disorder_prediction; F-box domain; F-box-like_dom_sf; FvH4_1g05892.t1_v4.0.a2; protein binding	protein binding	GO:0005515
IR_93	-2.92786	0.0184225	Fvb1:3135252-3135630	Fvb1	3137438	3138524	FvH4_1g05900	+	1809	Upstream TSS	NA	NA	AT5G67040.1 | F-box protein%2C putative (DUF295) | Chr5:26757896-26758475 REVERSE LENGTH=165 | 201606; F-box protein At2g26160-like [Rosa chinensis]; tr|A0A2P6RK12|A0A2P6RK12_ROSCH Putative F-box domain-containing protein OS=Rosa chinensis OX=74649 GN=RchiOBHm_Chr2g0092531 PE=4 SV=1	DUF295; FAMILY NOT NAMED; FvH4_1g05900.t1_v4.0.a2; ""> <signature-library-release library=	NA	NA
IR_93	-2.92786	0.0184225	Fvb1:3135252-3135630	Fvb1	3138527	3146506	FvH4_1g05910	-	2898	Downstream TTS	0.889008	0.000459925	AT2G20000.1 | CDC27 family protein | Chr2:8632324-8636900 REVERSE LENGTH=744 | 201606; PREDICTED: cell division cycle protein 27 homolog B isoform X2 [Fragaria vesca subsp. vesca]; sp|Q8LGU6|CD27B_ARATH Cell division cycle protein 27 homolog B OS=Arabidopsis thaliana OX=3702 GN=CDC27B PE=1 SV=1; tr|A0A2P6RJR5|A0A2P6RJR5_ROSCH Putative 43kDa postsynaptic protein OS=Rosa chinensis OX=74649 GN=RchiO…	ANAPC3; CELL DIVISION CYCLE 16,23,27; disorder_prediction; FvH4_1g05910.t1_v4.0.a2; protein binding; ""> <signature-library-release library=; TPR; TPR_1; TPR_16; TPR_19; TPR_2; TPR-contain_dom; TPR-like; TPR-like_helical_dom_sf; TPR_REGION; TPR_repeat	protein binding	GO:0005515
IR_8329	-2.91381	0.033917	Fvb6:32671535-32671726	Fvb6	32669699	32670930	FvH4_6g41601	-	605	Upstream TSS	13.5493	1.66878e-07	PREDICTED: elastin-like [Fragaria vesca subsp. vesca]	disorder_prediction; FvH4_6g41601.t1_v4.0.a2	NA	NA
IR_8329	-2.91381	0.033917	Fvb6:32671535-32671726	Fvb6	32674533	32675212	FvH4_6g41603	+	2808	Upstream TSS	NA	NA	AT2G04030.1 | Chaperone protein htpG family protein | Chr2:1281983-1285909 FORWARD LENGTH=780 | 201606; heat shock protein 90-5, chloroplastic [Rosa chinensis] &gt;gi|1358166061|gb|PRQ40538.1| putative Heat shock protein Hsp90 family [Rosa chinensis]; sp|Q9SIF2|HS905_ARATH Heat shock protein 90-5, chloroplastic OS=Arabidopsis thaliana OX=3702 GN=HSP90-5 PE=1 SV=1; tr|A0A2P6R2A4|A0A2P6R2A4_ROSCH P…	ATP binding; disorder_prediction; FvH4_6g41603.t1_v4.0.a2; HEAT SHOCK PROTEIN 90 FAMILY MEMBER; Hsp90_fam; protein folding; ""> <signature-library-release library=; unfolded protein binding	ATP binding; protein folding; unfolded protein binding	GO:0005524; GO:0006457; GO:0051082
IR_8329	-2.91381	0.033917	Fvb6:32671535-32671726	Fvb6	32672531	32673485	FvH4_6g41602	-	806	Downstream TTS	2.54019	0.499549	NA	Coil; disorder_prediction; FvH4_6g41602.t1_v4.0.a2	NA	NA
IR_6324	-2.86724	0.0445635	Fvb5:20416732-20417016	Fvb5	20418553	20421396	FvH4_5g29450	+	1538	Upstream TSS	-1.41493	0.0135716	AT4G12560.3 | F-box and associated interaction domains-containing protein | Chr4:7441815-7443157 FORWARD LENGTH=413 | 201606; PREDICTED: F-box protein CPR30-like [Fragaria vesca subsp. vesca]; sp|Q9SU30|CPR1_ARATH F-box protein CPR1 OS=Arabidopsis thaliana OX=3702 GN=CPR1 PE=1 SV=2; tr|A0A2P6RE55|A0A2P6RE55_ROSCH Putative F-box domain-containing protein OS=Rosa chinensis OX=74649 GN=RchiOBHm_Chr3…	FAMILY NOT NAMED; F-box; FBOX; F-box-assoc_interact_dom; F-box_dom; F-box domain; F-box-like_dom_sf; FvH4_5g29450.t1_v4.0.a2; protein binding; ""> <signature-library-release library=; TIGR01640	protein binding	GO:0005515
IR_6306	-2.85756	0.00951985	Fvb5:20124913-20125222	Fvb5	20103510	20124698	FvH4_5g28990	-	215	Upstream TSS	0.929869	0.00153841	AT1G71220.2 | EMS-MUTAGENIZED BRI1 SUPPRESSOR 1 | Chr1:26841664-26851730 FORWARD LENGTH=1614 | 201606; PREDICTED: UDP-glucose:glycoprotein glucosyltransferase [Fragaria vesca subsp. vesca]; sp|Q0WL80|UGGG_ARATH UDP-glucose:glycoprotein glucosyltransferase OS=Arabidopsis thaliana OX=3702 GN=UGGT PE=1 SV=1; tr|A0A2P6PD25|A0A2P6PD25_ROSCH Putative glycosyl transferase, family 8, nucleotide-diphospho…	Coil; disorder_prediction; ER Quality Control Compartment (ERQC); FvH4_5g28990.t1_v4.0.a2; Glyco_transf_24; GT8_HUGT1_C_like; Nucleotide-diphospho-sugar transferases; Nucleotide-diphossugar_trans; protein glycosylation; Thioredoxin_12; Thioredoxin_13; Thioredoxin_14; Thioredoxin_15; UDP-g_GGTase; UDP-g_GGtrans; UDP-GLUCOSE GLYCOPROTEIN:GLUCOSYLTRANSFERASE; UDP-GLUCOSE:GLYCOPROTEIN GLUCOSYLTRANSFE…	protein glycosylation; UDP-glucose:glycoprotein glucosyltransferase activity	GO:0003980; GO:0006486
IR_697	-2.70697	0.0215746	Fvb1:17221934-17222185	Fvb1	17216486	17221673	FvH4_1g25470	-	261	Upstream TSS	0.490207	0.0798423	AT2G13840.1 | Polymerase/histidinol phosphatase-like protein | Chr2:5788616-5791057 REVERSE LENGTH=434 | 201606; PREDICTED: uncharacterized protein LOC101309584 [Fragaria vesca subsp. vesca]; sp|P44176|RNAAM_HAEIN 5'-3' exoribonuclease OS=Haemophilus influenzae (strain ATCC 51907 / DSM 11121 / KW20 / Rd) OX=71421 GN=HI_1400 PE=3 SV=1; tr|A0A2P6RT33|A0A2P6RT33_ROSCH Putative phosphoribosyl 1,2-cyc…	catalytic activity; disorder_prediction; FAMILY NOT NAMED; FvH4_1g25470.t1_v4.0.a2; FvH4_1g25470.t2_v4.0.a2; Major pathway of rRNA processing in the nucleolus and cytosol; PHP; PHP_dom; PHP domain-like; PHP_HisPPase_AMP; Pol/histidinol_Pase-like; ""> <signature-library-release library=; tRNA processing in the nucleus	catalytic activity	GO:0003824
IR_697	-2.70697	0.0215746	Fvb1:17221934-17222185	Fvb1	17223339	17230203	FvH4_1g25480	-	1155	Downstream TTS	-0.0797032	0.863809	AT5G63620.1 | GroES-like zinc-binding alcohol dehydrogenase family protein | Chr5:25466380-25468296 REVERSE LENGTH=427 | 201606; PREDICTED: S-(hydroxymethyl)glutathione dehydrogenase [Fragaria vesca subsp. vesca]; sp|A4YGN0|SUCD_METS5 Succinate-semialdehyde dehydrogenase (acetylating) OS=Metallosphaera sedula (strain ATCC 51363 / DSM 5348 / JCM 9185 / NBRC 15509 / TH2) OX=399549 GN=Msed_1424 PE=1…	ADH_C; ADH_N; ADH_zinc_N; FAMILY NOT NAMED; FvH4_1g25480.t1_v4.0.a2; GroES-like; GroES-like_sf; NAD(P)-bd_dom_sf; NAD(P)-binding Rossmann-fold domains; oxidation-reduction process; ""> <signature-library-release library=	obsolete oxidation-reduction process	GO:0055114
IR_775	-2.67842	0.018482	Fvb1:18427790-18428081	Fvb1	18423967	18427686	FvH4_1g26610	+	104	Downstream TTS	-0.671157	0.250852	AT5G63540.1 | recQ-mediated instability protein (DUF1767) | Chr5:25441033-25444373 REVERSE LENGTH=644 | 201606; PREDICTED: recQ-mediated genome instability protein 1 [Fragaria vesca subsp. vesca]; sp|Q5XUX6|RMI1_ARATH RecQ-mediated genome instability protein 1 OS=Arabidopsis thaliana OX=3702 GN=RMI1 PE=1 SV=1; tr|A0A2P6P4R9|A0A2P6P4R9_ROSCH Putative RecQ mediated genome instability protein OS=Ros…	disorder_prediction; FAMILY NOT NAMED; FvH4_1g26610.t1_v4.0.a2; G2/M DNA damage checkpoint; HDR through Homologous Recombination (HRR); HDR through Single Strand Annealing (SSA); Homologous DNA Pairing and Strand Exchange; nucleotide binding; Presynaptic phase of homologous DNA pairing and strand exchange; Processing of DNA double-strand break ends; RecQ helicase-Topo III complex; RECQ-MEDIATED G…	nucleotide binding; RecQ family helicase-topoisomerase III complex	GO:0000166; GO:0031422
IR_9406	-2.58416	0.00202712	Fvb7:22424894-22425265	Fvb7	22420671	22422572	FvH4_7g30930	+	2322	Downstream TTS	-5.98643	0.000345695	AT4G27950.1 | cytokinin response factor 4 | Chr4:13909732-13910739 REVERSE LENGTH=335 | 201606; PREDICTED: ethylene-responsive transcription factor CRF4 [Fragaria vesca subsp. vesca]; sp|Q9SUE3|CRF4_ARATH Ethylene-responsive transcription factor CRF4 OS=Arabidopsis thaliana OX=3702 GN=CRF4 PE=1 SV=2; tr|A0A2P6SNV6|A0A2P6SNV6_ROSCH Putative transcription factor AP2-EREBP family OS=Rosa chinensis O…	NA	NA	NA
IR_5557	-2.52417	0.0462534	Fvb5:2885065-2885456	Fvb5	2882278	2884137	FvH4_5g04833	-	928	Upstream TSS	-3.46955	1.24499e-06	AT1G74620.1 | RING/U-box superfamily protein | Chr1:28028252-28029001 FORWARD LENGTH=249 | 201606; PREDICTED: probable E3 ubiquitin-protein ligase HIP1 [Fragaria vesca subsp. vesca] &gt;gi|764581416|ref|XP_011464000.1| PREDICTED: probable E3 ubiquitin-protein ligase HIP1 [Fragaria vesca subsp. vesca]; sp|O43085|DSC1_SCHPO DSC E3 ubiquitin ligase complex subunit 1 OS=Schizosaccharomyces pombe (str…	E3 UBIQUITIN-PROTEIN LIGASE PRAJA; FvH4_5g04833.t1_v4.0.a2; FvH4_5g04833.t2_v4.0.a2; RING/U-box; ""> <signature-library-release library=; zf-RING_2; ZF_RING_2; Znf_RING; Znf_RING/FYVE/PHD	NA	NA
IR_5557	-2.52417	0.0462534	Fvb5:2885065-2885456	Fvb5	2886254	2889563	FvH4_5g04840	-	799	Downstream TTS	-8.88474	0.117276	AT1G64480.3 | calcineurin B-like protein 8 | Chr1:23948028-23949751 REVERSE LENGTH=214 | 201606; PREDICTED: calcineurin B-like protein 7 [Fragaria vesca subsp. vesca] &gt;gi|764581423|ref|XP_011464001.1| PREDICTED: calcineurin B-like protein 7 [Fragaria vesca subsp. vesca] &gt;gi|764581426|ref|XP_011464002.1| PREDICTED: calcineurin B-like protein 7 [Fragaria vesca subsp. vesca]; sp|Q3HRP0|CNBL7_O…	CALCINEURIN B; calcium ion binding; EFh; EF-hand; EF_HAND_2; EF-hand_5; EF-hand_7; EF_hand_dom; EF-hand-dom_pair; FvH4_5g04840.t1_v4.0.a2; FvH4_5g04840.t3_v4.0.a2; FvH4_5g04840.t4_v4.0.a2; RECOVERIN; ""> <signature-library-release library=	calcium ion binding	GO:0005509
IR_5931	-2.48224	0.0456097	Fvb5:11862655-11863089	Fvb5	11865377	11869058	FvH4_5g20130	-	2289	Downstream TTS	-5.24804	0.0043123	AT2G35160.5 | SU(VAR)3-9 homolog 5 | Chr2:14823670-14825946 FORWARD LENGTH=758 | 201606; PREDICTED: histone-lysine N-methyltransferase, H3 lysine-9 specific SUVH6-like [Fragaria vesca subsp. vesca] &gt;gi|764591202|ref|XP_011465228.1| PREDICTED: histone-lysine N-methyltransferase, H3 lysine-9 specific SUVH6-like [Fragaria vesca subsp. vesca] &gt;gi|764591205|ref|XP_011465229.1| PREDICTED: histone…	disorder_prediction; FAMILY NOT NAMED; FvH4_5g20130.t1_v4.0.a2; FvH4_5g20130.t2_v4.0.a2; FvH4_5g20130.t3_v4.0.a2; FvH4_5g20130.t4_v4.0.a2; HISTONE-LYSINE N-METHYLTRANSFERASE, H3 LYSINE-9 SPECIFIC SUVH5-RELATED; PUA domain-like; PUA-like_sf; SAD_SRA; SRA_YDG; SRA-YDG_sf; YDG	NA	NA
IR_5539	-2.35942	0.0352751	Fvb5:2241220-2241656	Fvb5	2235500	2240641	FvH4_5g03782	-	579	Upstream TSS	-12.0548	4.41741e-21	ABC transporter C family member 10-like [Rosa chinensis]; AT3G59140.1 | multidrug resistance-associated protein 14 | Chr3:21863519-21868701 REVERSE LENGTH=1453 | 201606; sp|Q9LYS2|AB10C_ARATH ABC transporter C family member 10 OS=Arabidopsis thaliana OX=3702 GN=ABCC10 PE=2 SV=2; tr|A0A2P6P6E4|A0A2P6P6E4_ROSCH Putative xenobiotic-transporting ATPase OS=Rosa chinensis OX=74649 GN=RchiOBHm_Chr7g0195…	ABC1_TM_dom; ABC1_TM_sf; ABCC_MRP_domain1; ABCC_MRP_domain2; ABC_membrane; ABC_TM1F; ABC_tran; ABC_TRANSPORTER_1; ABC_TRANSPORTER_2; ABC_transporter_CS; ABC_transporter-like; ABC transporter transmembrane region; ATPase activity; ATPase activity, coupled to transmembrane movement of substances; ATP binding; FAMILY NOT NAMED; FvH4_5g03782.t1_v4.0.a2; integral component of membrane; P-loop containi…	ATPase-coupled transmembrane transporter activity; ATP binding; ATP hydrolysis activity; integral to membrane; transmembrane transport	GO:0005524; GO:0016021; GO:0016887; GO:0042626; GO:0055085
IR_5539	-2.35942	0.0352751	Fvb5:2241220-2241656	Fvb5	2243475	2244387	FvH4_5g03783	+	1820	Upstream TSS	NA	NA	NA	FvH4_5g03783.t1_v4.0.a2	NA	NA
IR_6909	-2.34512	0.0143215	Fvb6:5586900-5587177	Fvb6	5584456	5585404	FvH4_6g09410	+	1496	Downstream TTS	-0.156513	0.861132	AT3G08600.1 | transmembrane protein%2C putative (DUF1191) | Chr3:2612646-2613596 FORWARD LENGTH=316 | 201606; PREDICTED: uncharacterized protein LOC101297456 [Fragaria vesca subsp. vesca]; tr|A0A2P6R881|A0A2P6R881_ROSCH Uncharacterized protein OS=Rosa chinensis OX=74649 GN=RchiOBHm_Chr3g0459851 PE=4 SV=1	disorder_prediction; DUF1191; FAMILY NOT NAMED; FvH4_6g09410.t1_v4.0.a2; ""> <signature-library-release library=	NA	NA
IR_7672	-2.25532	0.0413954	Fvb6:20570549-20570825	Fvb6	20571628	20579959	FvH4_6g26900	-	804	Downstream TTS	0.206782	0.524458	AT1G06290.1 | acyl-CoA oxidase 3 | Chr1:1922423-1926002 FORWARD LENGTH=675 | 201606; PREDICTED: acyl-coenzyme A oxidase 3, peroxisomal-like isoform X1 [Fragaria vesca subsp. vesca]; sp|P0CZ23|ACOX3_ARATH Acyl-coenzyme A oxidase 3, peroxisomal OS=Arabidopsis thaliana OX=3702 GN=ACX3 PE=1 SV=1; tr|A0A2P6RUC6|A0A2P6RUC6_ROSCH Acyl-coenzyme A oxidase OS=Rosa chinensis OX=74649 GN=RchiOBHm_Chr2g012864…	10-cis-heptadecenoyl-CoA degradation (yeast); 10-trans-heptadecenoyl-CoA degradation (reductase-dependent, yeast); (4Z,7Z,10Z,13Z,16Z)-docosapentaenoate biosynthesis (6-desaturase); (5Z)-dodecenoate biosynthesis II; 6-gingerol analog biosynthesis (engineered); 9-cis, 11-trans-octadecadienoyl-CoA degradation (isomerase-dependent, yeast); ACOX; Acyl-CoA dehydrogenase C-terminal domain-like; Acyl-Co…	acyl-CoA oxidase activity; FAD binding; fatty acid beta-oxidation; fatty acid metabolic process; obsolete oxidation-reduction process; oxidoreductase activity, acting on the CH-CH group of donors; peroxisome	GO:0003997; GO:0005777; GO:0006631; GO:0006635; GO:0016627; GO:0055114; GO:0071949
IR_4778	-2.24615	0.0111131	Fvb4:17791717-17792069	Fvb4	17783898	17791453	FvH4_4g14190	-	264	Upstream TSS	-12.1402	8.45673e-80	AT5G35630.3 | glutamine synthetase 2 | Chr5:13831220-13833239 FORWARD LENGTH=430 | 201606; PREDICTED: glutamine synthetase leaf isozyme, chloroplastic [Fragaria vesca subsp. vesca]; sp|P15102|GLNA4_PHAVU Glutamine synthetase leaf isozyme, chloroplastic OS=Phaseolus vulgaris OX=3885 PE=2 SV=1; tr|A0A2P6QXG7|A0A2P6QXG7_ROSCH Glutamine synthetase OS=Rosa chinensis OX=74649 GN=RchiOBHm_Chr4g0419011 P…	Alanine, aspartate and glutamate metabolism; Amino acid synthesis and interconversion (transamination); Ammonia assimilation cycle I; Ammonia assimilation cycle II; Arginine biosynthesis; Astrocytic Glutamate-Glutamine Uptake And Metabolism; catalytic activity; FvH4_4g14190.t1_v4.0.a2; FvH4_4g14190.t2_v4.0.a2; GLNA_1; GLNA_ATP; Gln_synt_b-grasp; Gln-synt_C; Gln_synth_cat_dom; Gln_synth_gly_rich_s…	catalytic activity; glutamine biosynthetic process; glutamine synthetase activity; obsolete nitrogen compound metabolic process	GO:0003824; GO:0004356; GO:0006542; GO:0006807
IR_4778	-2.24615	0.0111131	Fvb4:17791717-17792069	Fvb4	17793034	17800029	FvH4_4g14200	+	966	Upstream TSS	0.100629	0.79894	AT4G14290.1 | alpha/beta-Hydrolases superfamily protein | Chr4:8225547-8230057 REVERSE LENGTH=558 | 201606; PREDICTED: uncharacterized protein LOC101299950 [Fragaria vesca subsp. vesca] &gt;gi|764572644|ref|XP_011462782.1| PREDICTED: uncharacterized protein LOC101299950 [Fragaria vesca subsp. vesca] &gt;gi|764572648|ref|XP_011462783.1| PREDICTED: uncharacterized protein LOC101299950 [Fragaria ves…	AB_hydrolase; alpha/beta-Hydrolases; ALPHA/BETA-HYDROLASES SUPERFAMILY PROTEIN; disorder_prediction; FAMILY NOT NAMED; FvH4_4g14200.t1_v4.0.a2; FvH4_4g14200.t2_v4.0.a2; Hydrolase_4	NA	NA
IR_3654	-2.21692	0.0194431	Fvb3:29199241-29199698	Fvb3	29200590	29202039	FvH4_3g33681	-	893	Downstream TTS	NA	NA	AT5G39340.1 | histidine-containing phosphotransmitter 3 | Chr5:15748941-15750248 FORWARD LENGTH=155 | 201606; PREDICTED: histidine-containing phosphotransfer protein 6-like isoform X1 [Fragaria vesca subsp. vesca]; sp|Q6VAK3|OHP1_ORYSJ Histidine-containing phosphotransfer protein 1 OS=Oryza sativa subsp. japonica OX=39947 GN=AHP1 PE=2 SV=1; tr|A0A2P6QHV5|A0A2P6QHV5_ROSCH Putative signal transduct…	FAMILY NOT NAMED; FvH4_3g33681.t1_v4.0.a2; Histidine-containing phosphotransfer domain, HPT domain; Hpt; HPT; HPT_dom_sf; phosphorelay signal transduction system; ""> <signature-library-release library=; Sig_transdc_His_kin_Hpt_dom	phosphorelay signal transduction system	GO:0000160
IR_5947	-2.10575	0.0439976	Fvb5:12347720-12348363	Fvb5	12344633	12347571	FvH4_5g20780	-	149	Upstream TSS	-3.65567	0.0409653	AT2G34930.1 | disease resistance family protein / LRR family protein | Chr2:14737169-14739886 REVERSE LENGTH=905 | 201606; PREDICTED: LRR receptor-like serine/threonine-protein kinase EFR [Fragaria vesca subsp. vesca]; sp|Q6JN46|EIX2_SOLLC Receptor-like protein EIX2 OS=Solanum lycopersicum OX=4081 GN=EIX2 PE=1 SV=2; tr|A0A2P6P9J9|A0A2P6P9J9_ROSCH Putative leucine-rich repeat-containing, plant-typ…	FAMILY NOT NAMED; FvH4_5g20780.t1_v4.0.a2; L domain-like; Leu-rich_rpt; LEURICHRPT; LRR_6; LRR_8; LRR_dom_sf; LRR_N_plant-typ; LRRNT_2; protein binding; RNI-like; ""> <signature-library-release library=	protein binding	GO:0005515
IR_7228	-2.09268	0.0335198	Fvb6:12346744-12347068	Fvb6	12339267	12346598	FvH4_6g18720	-	146	Upstream TSS	-1.27434	4.546e-07	AT5G03900.2 | Iron-sulfur cluster biosynthesis family protein | Chr5:1048338-1051869 FORWARD LENGTH=523 | 201606; sp|Q8GW20|Y5390_ARATH Uncharacterized protein At5g03900, chloroplastic OS=Arabidopsis thaliana OX=3702 GN=At5g03900 PE=2 SV=2; tr|A0A2P6RBX2|A0A2P6RBX2_ROSCH Uncharacterized protein OS=Rosa chinensis OX=74649 GN=RchiOBHm_Chr3g0473691 PE=4 SV=1; uncharacterized protein At5g03900, chlor…	FAMILY NOT NAMED; FvH4_6g18720.t1_v4.0.a2; FvH4_6g18720.t4_v4.0.a2; ""> <signature-library-release library=	NA	NA
IR_7228	-2.09268	0.0335198	Fvb6:12346744-12347068	Fvb6	12347789	12349140	FvH4_6g18730	-	722	Downstream TTS	NA	NA	AT1G13570.3 | F-box/RNI-like superfamily protein | Chr1:4642528-4643930 REVERSE LENGTH=416 | 201606; PREDICTED: F-box/FBD/LRR-repeat protein At1g13570-like [Fragaria vesca subsp. vesca]; tr|A0A2P6RBZ9|A0A2P6RBZ9_ROSCH Putative F-box domain, leucine-rich repeat domain, L domain-containing protein OS=Rosa chinensis OX=74649 GN=RchiOBHm_Chr3g0473701 PE=4 SV=1	FAMILY NOT NAMED; FBD; FvH4_6g18730.t1_v4.0.a2; Leu-rich_rpt_2; LRR_2; LRR_dom_sf; RNI-like; ""> <signature-library-release library=	NA	NA
IR_584	-1.95077	0.0362389	Fvb1:14986986-14987433	Fvb1	14981275	14984830	FvH4_1g23130	-	2156	Upstream TSS	-1.04152	0.0542768	AT4G39400.1 | Leucine-rich receptor-like protein kinase family protein | Chr4:18324826-18328416 FORWARD LENGTH=1196 | 201606; PREDICTED: systemin receptor SR160 [Fragaria vesca subsp. vesca] &gt;gi|395335476|gb|AFN54649.1| brassinosteroid receptor [Fragaria x ananassa]; sp|Q8L899|BRI1_SOLPE Systemin receptor SR160 OS=Solanum peruvianum OX=4082 PE=1 SV=1; tr|I6YPC3|I6YPC3_FRAAN Brassinosteroid rec…	ATP binding; FAMILY NOT NAMED; FvH4_1g23130.t1_v4.0.a2; Kinase-like_dom_sf; L domain-like; Leu-rich_rpt; LEURICHRPT; LRR_6; LRR_8; LRR_dom_sf; LRR_N_plant-typ; LRRNT_2; Pkinase; protein binding; protein kinase activity; PROTEIN_KINASE_ATP; Protein_kinase_ATP_BS; PROTEIN_KINASE_DOM; Protein kinase-like (PK-like); PROTEIN_KINASE_ST; protein phosphorylation; Prot_kinase_dom; RNI-like; SERINE/THREONI…	ATP binding; protein binding; protein kinase activity; protein phosphorylation	GO:0004672; GO:0005515; GO:0005524; GO:0006468
IR_311	-1.93965	0.0352751	Fvb1:9551518-9551935	Fvb1	9549529	9551180	FvH4_1g16570	-	338	Upstream TSS	-0.106041	0.823431	AT4G39220.2 | Rer1 family protein | Chr4:18264280-18265531 FORWARD LENGTH=191 | 201606; PREDICTED: protein RER1A [Fragaria vesca subsp. vesca]; sp|O48670|RER1A_ARATH Protein RER1A OS=Arabidopsis thaliana OX=3702 GN=RER1A PE=1 SV=1; tr|A0A2P6RNP6|A0A2P6RNP6_ROSCH Protein RER1 OS=Rosa chinensis OX=74649 GN=RchiOBHm_Chr2g0106481 PE=3 SV=1	AtER_Rer1p; disorder_prediction; FvH4_1g16570.t1_v4.0.a2; FvH4_1g16570.t2_v4.0.a2; integral component of membrane; PROTEIN RER1; Rer1	integral to membrane	GO:0016021
IR_311	-1.93965	0.0352751	Fvb1:9551518-9551935	Fvb1	9552092	9557456	FvH4_1g16580	+	158	Upstream TSS	-0.629578	0.400186	AT3G19420.1 | PTEN 2 | Chr3:6731824-6735354 FORWARD LENGTH=611 | 201606; PREDICTED: putative tyrosine-protein phosphatase TPTE [Fragaria vesca subsp. vesca]; sp|Q9LT75|PTN2A_ARATH Phosphatidylinositol 3,4,5-trisphosphate 3-phosphatase and protein-tyrosine-phosphatase PTEN2A OS=Arabidopsis thaliana OX=3702 GN=PTEN2A PE=1 SV=1; tr|A0A2P6RNQ8|A0A2P6RNQ8_ROSCH Putative phosphoric monoester hydrolase …	C2_TENSIN; dephosphorylation; disorder_prediction; FvH4_1g16580.t1_v4.0.a2; FvH4_1g16580.t2_v4.0.a2; PHOSPHATASE WITH HOMOLOGY TO TENSIN; PHOSPHATIDYLINOSITOL 3,4,5-TRISPHOSPHATE 3-PHOSPHATASE AND PROTEIN-TYROSINE-PHOSPHATASE PTEN2B; (Phosphotyrosine protein) phosphatases II; PPASE_TENSIN; protein tyrosine phosphatase activity; Prot-tyrosine_phosphatase-like; Tensin_C2-dom; Tensin_phosphatase; Ty…	dephosphorylation; protein tyrosine phosphatase activity	GO:0004725; GO:0016311
IR_311	-1.93965	0.0352751	Fvb1:9551518-9551935	Fvb1	9547304	9549053	FvH4_1g16560	+	2465	Downstream TTS	-0.971834	0.192031	AT3G50120.1 | transmembrane protein%2C putative (DUF247) | Chr3:18585157-18587246 REVERSE LENGTH=531 | 201606; PREDICTED: UPF0481 protein At3g47200 [Fragaria vesca subsp. vesca]; sp|Q9SD53|Y3720_ARATH UPF0481 protein At3g47200 OS=Arabidopsis thaliana OX=3702 GN=At3g47200 PE=2 SV=1; tr|A0A2P6RNR9|A0A2P6RNR9_ROSCH Uncharacterized protein OS=Rosa chinensis OX=74649 GN=RchiOBHm_Chr2g0106461 PE=4 SV=1	Coil; disorder_prediction; DUF247; DUF247_pln; FAMILY NOT NAMED; FvH4_1g16560.t1_v4.0.a2; PROTEIN, PUTATIVE (DUF247)-RELATED	NA	NA
IR_839	1.87014	0.0264105	Fvb1:20068954-20069373	Fvb1	20065271	20066268	FvH4_1g28230	-	2686	Upstream TSS	-1.27628	0.0200247	AT5G18130.1 | transmembrane protein | Chr5:5995634-5997165 FORWARD LENGTH=280 | 201606; PREDICTED: uncharacterized protein LOC101313552 [Fragaria vesca subsp. vesca]; tr|A0A2P6RHM2|A0A2P6RHM2_ROSCH Uncharacterized protein OS=Rosa chinensis OX=74649 GN=RchiOBHm_Chr3g0497011 PE=4 SV=1	disorder_prediction; F20H23.8 PROTEIN; FAMILY NOT NAMED; FvH4_1g28230.t1_v4.0.a2	NA	NA
IR_839	1.87014	0.0264105	Fvb1:20068954-20069373	Fvb1	20069624	20077317	FvH4_1g28240	-	252	Downstream TTS	1.19058	0.0128478	AT3G03860.1 | APR-like 5 | Chr3:992465-994315 FORWARD LENGTH=300 | 201606; PREDICTED: 5'-adenylylsulfate reductase-like 5, partial [Fragaria vesca subsp. vesca]; sp|Q93YX4|APRL5_ARATH 5'-adenylylsulfate reductase-like 5 OS=Arabidopsis thaliana OX=3702 GN=APRL5 PE=2 SV=1; tr|A0A2P6RHM1|A0A2P6RHM1_ROSCH Putative thioredoxin-like protein OS=Rosa chinensis OX=74649 GN=RchiOBHm_Chr3g0496981 PE=4 SV=1	5'-ADENYLYLSULFATE REDUCTASE-LIKE 7; cell redox homeostasis; FAMILY NOT NAMED; FvH4_1g28240.t1_v4.0.a2; Thioredoxin; THIOREDOXIN_2; Thioredoxin_domain; Thioredoxin-like; Thioredoxin-like_sf	cell redox homeostasis	GO:0045454
IR_5412	1.96724	0.0460793	Fvb4:32493389-32493915	Fvb4	32488926	32493163	FvH4_4g35010	-	226	Upstream TSS	-4.71217	6.27115e-10	AT1G10520.1 | DNA polymerase lambda (POLL) | Chr1:3465964-3469248 FORWARD LENGTH=529 | 201606; PREDICTED: DNA polymerase lambda-like [Fragaria vesca subsp. vesca]; sp|Q9FNY4|DPOLL_ARATH DNA polymerase lambda OS=Arabidopsis thaliana OX=3702 GN=POLL PE=1 SV=1; tr|A0A2P6R485|A0A2P6R485_ROSCH Putative DNA-directed DNA polymerase OS=Rosa chinensis OX=74649 GN=RchiOBHm_Chr4g0444541 PE=4 SV=1	BRCT; BRCT_dom; BRCT domain; BRCT_dom_sf; disorder_prediction; DNA binding; DNA-dir_DNA_pol_X; DNA-directed DNA polymerase activity; DNA_pol_b-like_N; DNA_pol_B_palm; DNA_pol_B_palm_palm; DNA_pol_B_thumb; DNA_pol_lambd_f; DNA_pol_lambd_fingers_domain; DNA_pol_lamdba_lyase_dom_sf; DNA_Pol_thumb_sf; DNA_pol_X; DNAPOLX; DNAPOLXBETA; DNA_pol_X_beta-like; DNA_pol-X_BS; DNA polymerase activity; DNA POL…	DNA binding; DNA-directed DNA polymerase activity; DNA polymerase activity; DNA repair; nucleotidyltransferase activity; nucleus	GO:0003677; GO:0003887; GO:0005634; GO:0006281; GO:0016779; GO:0034061
IR_5412	1.96724	0.0460793	Fvb4:32493389-32493915	Fvb4	32495639	32499862	FvH4_4g35030	-	1725	Downstream TTS	2.09169	6.35896e-07	AT1G10520.1 | DNA polymerase lambda (POLL) | Chr1:3465964-3469248 FORWARD LENGTH=529 | 201606; PREDICTED: DNA polymerase lambda-like isoform X1 [Fragaria vesca subsp. vesca]; sp|Q9FNY4|DPOLL_ARATH DNA polymerase lambda OS=Arabidopsis thaliana OX=3702 GN=POLL PE=1 SV=1; tr|A0A2P6R4E1|A0A2P6R4E1_ROSCH Putative DNA-directed DNA polymerase OS=Rosa chinensis OX=74649 GN=RchiOBHm_Chr4g0444551 PE=3 SV=1	BRCT; BRCT_dom; BRCT domain; BRCT_dom_sf; disorder_prediction; DNA binding; DNA-dir_DNA_pol_X; DNA-directed DNA polymerase activity; DNA_pol_b-like_N; DNA_pol_B_palm; DNA_pol_B_palm_palm; DNA_pol_B_thumb; DNA_pol_lambd_f; DNA_pol_lambd_fingers_domain; DNA_pol_lamdba_lyase_dom_sf; DNA_Pol_thumb_sf; DNA_pol_X; DNAPOLX; DNAPOLXBETA; DNA_pol_X_beta-like; DNA_pol-X_BS; DNA polymerase activity; DNA POL…	DNA binding; DNA-directed DNA polymerase activity; DNA polymerase activity; DNA repair; nucleotidyltransferase activity; nucleus	GO:0003677; GO:0003887; GO:0005634; GO:0006281; GO:0016779; GO:0034061
IR_1949	2.08579	0.0280628	Fvb2:17763602-17763948	Fvb2	17760833	17763344	FvH4_2g21350	-	258	Upstream TSS	-2.5284	8.14184e-13	AT1G06190.1 | Rho termination factor | Chr1:1892467-1894078 REVERSE LENGTH=401 | 201606; PREDICTED: rho-N domain-containing protein 1, chloroplastic [Fragaria vesca subsp. vesca]; sp|Q94K75|RHON1_ARATH Rho-N domain-containing protein 1, chloroplastic OS=Arabidopsis thaliana OX=3702 GN=RHON1 PE=1 SV=1; tr|A0A2P6PV83|A0A2P6PV83_ROSCH Putative SAP domain, Rho termination factor OS=Rosa chinensis OX=…	ATP BINDING / ATPASE; disorder_prediction; DNA-templated transcription, termination; FAMILY NOT NAMED; FvH4_2g21350.t1_v4.0.a2; Rho_N	DNA-templated transcription termination	GO:0006353
IR_1593	2.17364	0.0422914	Fvb2:11742113-11742810	Fvb2	11744926	11745310	FvH4_2g13431	-	2117	Downstream TTS	NA	NA	NA	FvH4_2g13431.t1_v4.0.a2	NA	NA
IR_8000	2.19809	0.00951985	Fvb6:26160765-26161121	Fvb6	26158532	26160168	FvH4_6g33072	-	597	Upstream TSS	NA	NA	AT3G19700.1 | Leucine-rich repeat protein kinase family protein | Chr3:6843662-6846791 FORWARD LENGTH=991 | 201606; PREDICTED: receptor-like protein kinase HAIKU2 [Fragaria vesca subsp. vesca]; sp|Q9LJM4|IKU2_ARATH Receptor-like protein kinase HAIKU2 OS=Arabidopsis thaliana OX=3702 GN=IKU2 PE=1 SV=1; tr|A0A2P6PJH9|A0A2P6PJH9_ROSCH Uncharacterized protein OS=Rosa chinensis OX=74649 GN=RchiOBHm_Chr…	disorder_prediction; FvH4_6g33072.t1_v4.0.a2; L domain-like; LRR_dom_sf	NA	NA
IR_7303	2.25351	0.00559115	Fvb6:13948930-13949337	Fvb6	13945402	13946457	FvH4_6g20342	-	2473	Upstream TSS	NA	NA	tr|A0A2P6QC43|A0A2P6QC43_ROSCH Putative ribonuclease H-like domain-containing protein OS=Rosa chinensis OX=74649 GN=RchiOBHm_Chr5g0038961 PE=4 SV=1; uncharacterized protein LOC112164413 [Rosa chinensis]	FAMILY NOT NAMED; FvH4_6g20342.t1_v4.0.a2; nucleic acid binding; POLYNUCLEOTIDYL TRANSFERASE, RIBONUCLEASE H-LIKE SUPERFAMILY PROTEIN; RNA-DNA hybrid ribonuclease activity; RNaseH_domain; RNase_H_like; RNaseH_sf; RVT_3	nucleic acid binding; RNA-DNA hybrid ribonuclease activity	GO:0003676; GO:0004523
IR_7303	2.25351	0.00559115	Fvb6:13948930-13949337	Fvb6	13950478	13955299	FvH4_6g20350	+	1142	Upstream TSS	1.02897	0.000159999	AT2G35940.3 | BEL1-like homeodomain 1 | Chr2:15089171-15091699 REVERSE LENGTH=680 | 201606; PREDICTED: BEL1-like homeodomain protein 1 [Fragaria vesca subsp. vesca]; sp|Q9SJ56|BLH1_ARATH BEL1-like homeodomain protein 1 OS=Arabidopsis thaliana OX=3702 GN=BLH1 PE=1 SV=1; tr|A0A2P6RCJ7|A0A2P6RCJ7_ROSCH Putative transcription factor Homobox-WOX family OS=Rosa chinensis OX=74649 GN=RchiOBHm_Chr3g04759…	disorder_prediction; DNA binding; FvH4_6g20350.t1_v4.0.a2; FvH4_6g20350.t2_v4.0.a2; FvH4_6g20350.t3_v4.0.a2; FvH4_6g20350.t4_v4.0.a2; FvH4_6g20350.t5_v4.0.a2; FvH4_6g20350.t6_v4.0.a2; FvH4_6g20350.t7_v4.0.a2; FvH4_6g20350.t8_v4.0.a2; FvH4_6g20350.t9_v4.0.a2; HOMEOBOX_2; Homeobox_dom; Homeobox_KN; Homeobox_KN_domain; Homeobox-like_sf; HOMEOBOX PROTEIN TRANSCRIPTION FACTORS; homeodomain; Homeodomai…	DNA binding; regulation of DNA-templated transcription	GO:0003677; GO:0006355
IR_425	2.34578	0.0212372	Fvb1:12094842-12095015	Fvb1	12095396	12098436	FvH4_1g19970	+	382	Upstream TSS	-1.09649	0.0154874	AT2G22490.1 | Cyclin D2%3B1 | Chr2:9554157-9555873 REVERSE LENGTH=361 | 201606; PREDICTED: cyclin-D2-1 [Fragaria vesca subsp. vesca]; sp|P42752|CCD21_ARATH Cyclin-D2-1 OS=Arabidopsis thaliana OX=3702 GN=CYCD2-1 PE=1 SV=3; tr|A0A2P6RQ27|A0A2P6RQ27_ROSCH Putative cyclin OS=Rosa chinensis OX=74649 GN=RchiOBHm_Chr2g0111911 PE=3 SV=1	Cyclin; CYCLIN; Cyclin_A_B_D_E; Cyclin_C; Cyclin_C-dom; CYCLIN-D2-1; CYCLINE; Cyclin-like; Cyclin-like_sf; Cyclin_N; FvH4_1g19970.t1_v4.0.a2; nucleus	nucleus	GO:0005634
IR_8536	2.3941	0.0351209	Fvb6:38738333-38738802	Fvb6	38732129	38737168	FvH4_6g52720	-	1165	Upstream TSS	1.40378	0.0198359	AT5G40760.2 | glucose-6-phosphate dehydrogenase 6 | Chr5:16311284-16314556 FORWARD LENGTH=515 | 201606; PREDICTED: glucose-6-phosphate 1-dehydrogenase, cytoplasmic isoform 2 [Fragaria vesca subsp. vesca] &gt;gi|764612847|ref|XP_011467727.1| PREDICTED: glucose-6-phosphate 1-dehydrogenase, cytoplasmic isoform 2 [Fragaria vesca subsp. vesca]; sp|Q9FJI5|G6PD6_ARATH Glucose-6-phosphate 1-dehydrogenase…	NA	NA	NA
IR_8536	2.3941	0.0351209	Fvb6:38738333-38738802	Fvb6	38739487	38740274	FvH4_6g52721	-	686	Downstream TTS	NA	NA	PREDICTED: zinc finger BED domain-containing protein RICESLEEPER 1-like [Fragaria vesca subsp. vesca]; tr|A0A2P6RA62|A0A2P6RA62_ROSCH Putative HAT dimerization domain, ribonuclease H-like domain, hAT-like transposase, RNase-H OS=Rosa chinensis OX=74649 GN=RchiOBHm_Chr3g0467291 PE=4 SV=1	NA	NA	NA
IR_3236	2.41132	0.0125568	Fvb3:20264404-20264710	Fvb3	20257280	20264168	FvH4_3g27180	+	236	Downstream TTS	-8.04247	2.41698e-41	AT2G21530.1 | SMAD/FHA domain-containing protein | Chr2:9219372-9220464 FORWARD LENGTH=209 | 201606; PREDICTED: uncharacterized protein LOC101297045 isoform X3 [Fragaria vesca subsp. vesca]; tr|A0A2P6QEZ8|A0A2P6QEZ8_ROSCH Putative zeaxanthin epoxidase OS=Rosa chinensis OX=74649 GN=RchiOBHm_Chr5g0049851 PE=4 SV=1	disorder_prediction; FHA; FHA_dom; FHA_DOMAIN; FvH4_3g27180.t1_v4.0.a2; NUCLEAR INHIBITOR OF PROTEIN PHOSPHATASE-1; protein binding; ""> <signature-library-release library=; SMAD/FHA domain; SMAD_FHA_dom_sf	protein binding	GO:0005515
IR_1083	2.44973	0.0350387	Fvb2:1183553-1183935	Fvb2	1184473	1185917	FvH4_2g01240	-	539	Downstream TTS	-1.87637	0.00221304	AT1G64230.2 | ubiquitin-conjugating enzyme 28 | Chr1:23833792-23835220 FORWARD LENGTH=148 | 201606; PREDICTED: ubiquitin-conjugating enzyme E2 28-like [Fragaria vesca subsp. vesca]; sp|Q94F47|UBC28_ARATH Ubiquitin-conjugating enzyme E2 28 OS=Arabidopsis thaliana OX=3702 GN=UBC28 PE=1 SV=1; tr|A0A2P6PKX5|A0A2P6PKX5_ROSCH Putative aminoacyltransferase, E1 ubiquitin-activating enzyme OS=Rosa chinens…	Antigen processing: Ubiquitination &amp; Proteasome degradation; FAMILY NOT NAMED; FvH4_2g01240.t1_v4.0.a2; Protein ubiquitination; ""> <signature-library-release library=; UBCc; UBC-like; UBIQUITIN_CONJUGAT_1; UBIQUITIN_CONJUGAT_2; UBQ-conjugat_E2; UBQ-conjugating_AS; UBQ-conjugating_enzyme/RWD; UQ_con	NA	NA
IR_1083	2.44973	0.0350387	Fvb2:1183553-1183935	Fvb2	1186175	1189492	FvH4_2g01250	-	2241	Downstream TTS	0.193379	0.614521	AT4G35020.3 | RAC-like 3 | Chr4:16673176-16674540 FORWARD LENGTH=198 | 201606; PREDICTED: rac-like GTP-binding protein 5 [Fragaria vesca subsp. vesca]; sp|Q38912|RAC3_ARATH Rac-like GTP-binding protein ARAC3 OS=Arabidopsis thaliana OX=3702 GN=ARAC3 PE=1 SV=1; tr|A0A2P6PKX3|A0A2P6PKX3_ROSCH Putative small GTPase superfamily, P-loop containing nucleoside triphosphate hydrolase OS=Rosa chinensis OX=…	FvH4_2g01250.t1_v4.0.a2; GTPase activity; GTP binding; P-loop containing nucleoside triphosphate hydrolases; P-loop_NTPase; Ras; RASTRNSFRMNG; RHO; RHO FAMILY GTPASE; Rho GTPase cycle; Rop_like; ""> <signature-library-release library=; Small_GTPase; small GTPase mediated signal transduction; Small_GTPase_Rho; Small_GTP-bd_dom; TIGR00231	GTPase activity; GTP binding; small GTPase-mediated signal transduction	GO:0003924; GO:0005525; GO:0007264
IR_549	2.49628	0.0386346	Fvb1:14145158-14145343	Fvb1	14145633	14150251	FvH4_1g22230	+	291	Upstream TSS	0.221486	0.463874	AT5G64860.1 | disproportionating enzyme | Chr5:25925373-25928788 REVERSE LENGTH=576 | 201606; PREDICTED: 4-alpha-glucanotransferase, chloroplastic/amyloplastic [Fragaria vesca subsp. vesca]; sp|Q06801|DPEP_SOLTU 4-alpha-glucanotransferase, chloroplastic/amyloplastic OS=Solanum tuberosum OX=4113 GN=DPEP PE=1 SV=1; tr|A0A2P6RR79|A0A2P6RR79_ROSCH 4-alpha-glucanotransferase OS=Rosa chinensis OX=74649…	4-alpha-glucanotransferase activity; carbohydrate metabolic process; FAMILY NOT NAMED; FvH4_1g22230.t1_v4.0.a2; Glycogen degradation II; Glyco_hydro_77; Glycoside_hydrolase_SF; Starch and sucrose metabolism; Starch degradation II; Starch degradation V; Sucrose biosynthesis II; TIGR00217; (Trans)glycosidases	4-alpha-glucanotransferase activity; carbohydrate metabolic process	GO:0004134; GO:0005975
IR_549	2.49628	0.0386346	Fvb1:14145158-14145343	Fvb1	14141233	14142655	FvH4_1g22210	+	2503	Downstream TTS	-6.31565	7.97434e-12	AT2G21990.1 | MIZU-KUSSEI-like protein (Protein of unknown function%2C DUF617) | Chr2:9359573-9360331 REVERSE LENGTH=252 | 201606; PREDICTED: protein MIZU-KUSSEI 1 [Fragaria vesca subsp. vesca]; sp|O22227|MIZ1_ARATH Protein MIZU-KUSSEI 1 OS=Arabidopsis thaliana OX=3702 GN=MIZ1 PE=1 SV=1; tr|A0A2P6RR85|A0A2P6RR85_ROSCH Uncharacterized protein OS=Rosa chinensis OX=74649 GN=RchiOBHm_Chr2g0116351 PE=…	disorder_prediction; DUF617; FAMILY NOT NAMED; FvH4_1g22210.t1_v4.0.a2; hydrotropism; MIZ1-like_pln; ""> <signature-library-release library=; TIGR01570	hydrotropism	GO:0010274
IR_549	2.49628	0.0386346	Fvb1:14145158-14145343	Fvb1	14143429	14144144	FvH4_1g22220	+	1014	Downstream TTS	3.14419	5.30035e-08	AT2G21970.1 | stress enhanced protein 2 | Chr2:9357188-9357874 REVERSE LENGTH=202 | 201606; PREDICTED: stress enhanced protein 2, chloroplastic [Fragaria vesca subsp. vesca]; sp|Q9SJ02|STEP2_ARATH Stress enhanced protein 2, chloroplastic OS=Arabidopsis thaliana OX=3702 GN=SEP2 PE=2 SV=1; tr|A0A2P6RRC0|A0A2P6RRC0_ROSCH Putative chlorophyll a/b binding protein OS=Rosa chinensis OX=74649 GN=RchiOBHm…	Chlorophyll a-b binding protein; FAMILY NOT NAMED; FvH4_1g22220.t1_v4.0.a2	NA	NA
IR_1609	2.53569	0.0190918	Fvb2:12033097-12033540	Fvb2	12028159	12031110	FvH4_2g13810	-	1987	Upstream TSS	-8.47481	7.50539e-11	AT1G43650.1 | nodulin MtN21 /EamA-like transporter family protein | Chr1:16443861-16446814 REVERSE LENGTH=343 | 201606; PREDICTED: WAT1-related protein At1g43650 [Fragaria vesca subsp. vesca]; sp|Q6NMB7|WTR7_ARATH WAT1-related protein At1g43650 OS=Arabidopsis thaliana OX=3702 GN=At1g43650 PE=2 SV=1; tr|A0A2P6PS21|A0A2P6PS21_ROSCH WAT1-related protein OS=Rosa chinensis OX=74649 GN=RchiOBHm_Chr6g02…	EamA; EamA_dom; FAMILY NOT NAMED; FvH4_2g13810.t1_v4.0.a2; integral component of membrane; membrane; Multidrug resistance efflux transporter EmrE; ""> <signature-library-release library=; transmembrane transporter activity; WAT1-related	integral to membrane; membrane; transmembrane transporter activity	GO:0016020; GO:0016021; GO:0022857
IR_450	2.56656	0.0126197	Fvb1:12341722-12342093	Fvb1	12343668	12344946	FvH4_1g20130	+	1576	Upstream TSS	-2.87623	0.17406	AT5G65340.1 | MIZU-KUSSEI-like protein (Protein of unknown function%2C DUF617) | Chr5:26113684-26114445 REVERSE LENGTH=253 | 201606; PREDICTED: protein MIZU-KUSSEI 1-like [Fragaria vesca subsp. vesca]; sp|O22227|MIZ1_ARATH Protein MIZU-KUSSEI 1 OS=Arabidopsis thaliana OX=3702 GN=MIZ1 PE=1 SV=1; tr|A0A2P6RQ51|A0A2P6RQ51_ROSCH Uncharacterized protein OS=Rosa chinensis OX=74649 GN=RchiOBHm_Chr2g0112…	DUF617; FAMILY NOT NAMED; FvH4_1g20130.t1_v4.0.a2; hydrotropism; MIZ1-like_pln; ""> <signature-library-release library=; TIGR01570	hydrotropism	GO:0010274
IR_2166	2.60853	0.000389163	Fvb2:23488634-23489054	Fvb2	23467351	23488463	FvH4_2g30330	-	171	Upstream TSS	0.500377	0.286711	AT2G25730.3 | zinc finger FYVE domain protein | Chr2:10956751-10972729 REVERSE LENGTH=2487 | 201606; PREDICTED: uncharacterized protein LOC101291736 isoform X1 [Fragaria vesca subsp. vesca]; sp|Q551A3|Y6689_DICDI Protein DDB_G0276689 OS=Dictyostelium discoideum OX=44689 GN=DDB_G0276689 PE=4 SV=2; tr|A0A2P6Q1P8|A0A2P6Q1P8_ROSCH Uncharacterized protein OS=Rosa chinensis OX=74649 GN=RchiOBHm_Chr6g03…	Coil; disorder_prediction; FAMILY NOT NAMED; FvH4_2g30330.t1_v4.0.a2; protein binding; TPR; TPR_repeat	protein binding	GO:0005515
IR_9198	2.66063	0.0133091	Fvb7:15541396-15541735	Fvb7	15538002	15540856	FvH4_7g18710	+	540	Downstream TTS	-2.24664	1.26265e-09	AT3G10405.1 | vacuolar acid trehalase | Chr3:3233978-3235118 REVERSE LENGTH=212 | 201606; PREDICTED: uncharacterized protein LOC101312783 [Fragaria vesca subsp. vesca]; tr|A0A2P6SJ73|A0A2P6SJ73_ROSCH Uncharacterized protein OS=Rosa chinensis OX=74649 GN=RchiOBHm_Chr1g0362491 PE=4 SV=1	NA	NA	NA
IR_1815	2.67349	0.0402201	Fvb2:15258390-15258726	Fvb2	15255648	15257159	FvH4_2g17770	+	1231	Downstream TTS	NA	NA	NA	FvH4_2g17770.t1_v4.0.a2	NA	NA
IR_1815	2.67349	0.0402201	Fvb2:15258390-15258726	Fvb2	15259879	15265082	FvH4_2g17780	-	1154	Downstream TTS	-8.20979	2.3357e-23	AT5G48460.1 | Actin binding Calponin homology (CH) domain-containing protein | Chr5:19636225-19639365 REVERSE LENGTH=654 | 201606; PREDICTED: fimbrin-2 [Fragaria vesca subsp. vesca]; sp|O50064|FIMB2_ARATH Fimbrin-2 OS=Arabidopsis thaliana OX=3702 GN=FIM2 PE=2 SV=1; tr|A0A2P6PTY1|A0A2P6PTY1_ROSCH Putative calponin domain-containing protein OS=Rosa chinensis OX=74649 GN=RchiOBHm_Chr6g0282801 PE=4 S…	actin filament binding; actin filament bundle assembly; Calponin-homology domain, CH-domain; CH; CH-domain; CH_dom_sf; Coil; disorder_prediction; Fimbrin/Plastin; FIMBRIN/PLASTIN; FvH4_2g17780.t1_v4.0.a2; protein binding; ""> <signature-library-release library=	actin filament binding; actin filament bundle assembly; protein binding	GO:0005515; GO:0051015; GO:0051017
IR_8679	2.72772	0.0239888	Fvb7:2663787-2664103	Fvb7	2665535	2667704	FvH4_7g02370	-	1433	Downstream TTS	-1.96849	8.82521e-06	AT1G52340.1 | NAD(P)-binding Rossmann-fold superfamily protein | Chr1:19489997-19491527 REVERSE LENGTH=285 | 201606; PREDICTED: xanthoxin dehydrogenase [Fragaria vesca subsp. vesca]; sp|Q9C826|ABA2_ARATH Xanthoxin dehydrogenase OS=Arabidopsis thaliana OX=3702 GN=ABA2 PE=1 SV=1; tr|A0A2P6S8L1|A0A2P6S8L1_ROSCH Putative xanthoxin dehydrogenase OS=Rosa chinensis OX=74649 GN=RchiOBHm_Chr1g0319721 PE=4…	NA	NA	NA
IR_271	2.76569	0.0121234	Fvb1:8347788-8348312	Fvb1	8350716	8355108	FvH4_1g14901	+	2405	Upstream TSS	-1.90103	0.469481	methylesterase 4-like [Rosa chinensis]; tr|A0A2P6SB51|A0A2P6SB51_ROSCH Putative 3-oxolaurate decarboxylase OS=Rosa chinensis OX=74649 GN=RchiOBHm_Chr1g0329921 PE=4 SV=1	FvH4_1g14901.t1_v4.0.a2	NA	NA
IR_8827	2.77754	0.00113599	Fvb7:6607179-6607638	Fvb7	6603027	6605749	FvH4_7g06620	-	1430	Upstream TSS	NA	NA	PREDICTED: kinesin-related protein 4-like [Fragaria vesca subsp. vesca]	NA	NA	NA
IR_2076	2.84633	0.0451271	Fvb2:21336379-21336699	Fvb2	21337638	21338177	FvH4_2g26601	+	940	Upstream TSS	NA	NA	AT5G45050.2 | Disease resistance protein (TIR-NBS-LRR class) | Chr5:18177016-18181805 REVERSE LENGTH=1344 | 201606; putative TIR domain, winged helix-turn-helix DNA-binding domain-containing protein [Rosa chinensis]; sp|Q9FL92|RRS1B_ARATH Disease resistance protein RRS1B OS=Arabidopsis thaliana OX=3702 GN=RRS1B PE=1 SV=1; tr|A0A2P6PXC4|A0A2P6PXC4_ROSCH Putative TIR domain, winged helix-turn-helix…	DISEASE RESISTANCE PROTEIN (TIR-NBS-LRR CLASS); FvH4_2g26601.t1_v4.0.a2; LEUCINE-RICH REPEAT-CONTAINING PROTEIN; &quot;Winged helix&quot; DNA-binding domain; WH_DNA-bd_sf	NA	NA
IR_6786	2.87554	0.0460793	Fvb6:2103589-2104278	Fvb6	2101665	2102614	FvH4_6g03893	-	975	Upstream TSS	NA	NA	NA	FvH4_6g03893.t1_v4.0.a2	NA	NA
IR_6786	2.87554	0.0460793	Fvb6:2103589-2104278	Fvb6	2106475	2107710	FvH4_6g03894	-	2198	Downstream TTS	NA	NA	NA	Acid proteases; FvH4_6g03894.t1_v4.0.a2; Peptidase_aspartic_dom_sf	NA	NA
IR_8631	2.88758	0.00775538	Fvb7:1766131-1766353	Fvb7	1767198	1767756	FvH4_7g01350	+	846	Upstream TSS	NA	NA	AT2G43000.1 | NAC domain containing protein 42 | Chr2:17880617-17882584 REVERSE LENGTH=275 | 201606; sp|Q9SK55|NAC42_ARATH Transcription factor JUNGBRUNNEN 1 OS=Arabidopsis thaliana OX=3702 GN=JUB1 PE=1 SV=1; tr|A0A314Z824|A0A314Z824_PRUYE Transcription factor JUNGBRUNNEN 1-like OS=Prunus yedoensis var. nudiflora OX=2094558 GN=Pyn_01684 PE=4 SV=1; transcription factor JUNGBRUNNEN 1-like [Rosa chi…	NA	NA	NA
IR_852	2.91111	0.00407971	Fvb1:20157555-20157948	Fvb1	20149243	20157548	FvH4_1g28330	+	7	Downstream TTS	0.474129	0.097537	AT3G03810.2 | O-fucosyltransferase family protein | Chr3:972190-975901 REVERSE LENGTH=656 | 201606; PREDICTED: uncharacterized protein At1g04910 isoform X2 [Fragaria vesca subsp. vesca]; sp|F4J2C8|EDA30_ARATH Protein EMBRYO SAC DEVELOPMENT ARREST 30 OS=Arabidopsis thaliana OX=3702 GN=EDA30 PE=2 SV=1; tr|A0A2P6RHK0|A0A2P6RHK0_ROSCH Putative GDP-fucose protein O-fucosyltransferase OS=Rosa chinensis…	disorder_prediction; FAMILY NOT NAMED; FvH4_1g28330.t1_v4.0.a2; GDP-Fuc_O-FucTrfase; O-FucT; PROTEIN EMBRYO SAC DEVELOPMENT ARREST 30	NA	NA
IR_852	2.91111	0.00407971	Fvb1:20157555-20157948	Fvb1	20158202	20160755	FvH4_1g28340	-	255	Downstream TTS	3.03426	8.56966e-05	PREDICTED: uncharacterized protein DDB_G0283697 [Fragaria vesca subsp. vesca] &gt;gi|470103991|ref|XP_004288408.1| PREDICTED: uncharacterized protein DDB_G0283697 [Fragaria vesca subsp. vesca]; tr|A0A1U8PD02|A0A1U8PD02_GOSHI DNA ligase 1-like OS=Gossypium hirsutum OX=3635 GN=LOC107957212 PE=4 SV=1	Coil; disorder_prediction; FAMILY NOT NAMED; FvH4_1g28340.t1_v4.0.a2; FvH4_1g28340.t2_v4.0.a2; ""> <signature-library-release library=	NA	NA
IR_4193	2.92099	0.00274691	Fvb4:2454860-2455067	Fvb4	2446593	2453920	FvH4_4g02690	-	940	Upstream TSS	-8.14335	6.60281e-32	AT5G43630.4 | zinc knuckle (CCHC-type) family protein | Chr5:17527261-17530207 FORWARD LENGTH=831 | 201606; PREDICTED: uncharacterized protein LOC101293145 isoform X2 [Fragaria vesca subsp. vesca]; tr|A0A2P6QQ99|A0A2P6QQ99_ROSCH Putative transcription factor interactor and regulator CCHC(Zn) family OS=Rosa chinensis OX=74649 GN=RchiOBHm_Chr4g0390511 PE=4 SV=1	disorder_prediction; DNA binding; E3 ubiquitin ligases ubiquitinate target proteins; Formation of RNA Pol II elongation complex; FvH4_4g02690.t1_v4.0.a2; FvH4_4g02690.t3_v4.0.a2; Plus-3; PLUS3; Plus-3_dom; Plus3-like; Plus3-like_sf; RNA Polymerase II Pre-transcription Events; RNA Polymerase II Transcription Elongation; UNCHARACTERIZED; ZINC KNUCKLE (CCHC-TYPE) FAMILY PROTEIN	DNA binding	GO:0003677
IR_4193	2.92099	0.00274691	Fvb4:2454860-2455067	Fvb4	2457778	2458595	FvH4_4g02691	-	2712	Downstream TTS	2.99997	0.305451	NA	FvH4_4g02691.t1_v4.0.a2	NA	NA
IR_5084	2.94529	0.0380206	Fvb4:23713196-23713654	Fvb4	23710790	23711303	FvH4_4g20440	-	1893	Upstream TSS	NA	NA	AT1G47960.2 | cell wall / vacuolar inhibitor of fructosidase 1 | Chr1:17682425-17683516 REVERSE LENGTH=166 | 201606; PREDICTED: cell wall / vacuolar inhibitor of fructosidase 1 [Fragaria vesca subsp. vesca]; sp|F4HWQ8|CVIF1_ARATH Cell wall / vacuolar inhibitor of fructosidase 1 OS=Arabidopsis thaliana OX=3702 GN=C/VIF1 PE=1 SV=1; tr|A0A2I4GTK9|A0A2I4GTK9_JUGRE cell wall / vacuolar inhibitor of fr…	CELL WALL / VACUOLAR INHIBITOR OF FRUCTOSIDASE 1; CIF_like; C/VIF1; enzyme inhibitor activity; FAMILY NOT NAMED; FvH4_4g20440.t1_v4.0.a2; Invertase/methylesterase_inhib; negative regulation of catalytic activity; Pectinesterase_inhib_dom; Plant invertase/pectin methylesterase inhibitor; PMEI; TIGR01614	enzyme inhibitor activity; negative regulation of catalytic activity	GO:0004857; GO:0043086
IR_5084	2.94529	0.0380206	Fvb4:23713196-23713654	Fvb4	23712331	23712595	FvH4_4g20450	-	601	Upstream TSS	1.34809	0.0730287	AT5G49525.1 | transmembrane protein | Chr5:20097132-20097374 REVERSE LENGTH=80 | 201606; PREDICTED: uncharacterized protein LOC105350667 [Fragaria vesca subsp. vesca]; tr|A0A2P6QZA9|A0A2P6QZA9_ROSCH Uncharacterized protein OS=Rosa chinensis OX=74649 GN=RchiOBHm_Chr4g0425921 PE=4 SV=1	FAMILY NOT NAMED; FvH4_4g20450.t1_v4.0.a2; ""> <signature-library-release library=	NA	NA
IR_5084	2.94529	0.0380206	Fvb4:23713196-23713654	Fvb4	23714914	23718358	FvH4_4g20460	+	1261	Upstream TSS	-0.421749	0.563959	AT1G47970.1 | nucleolin | Chr1:17687342-17688562 FORWARD LENGTH=198 | 201606; PREDICTED: prostatic spermine-binding protein-like [Fragaria vesca subsp. vesca]; tr|A0A1S4APY6|A0A1S4APY6_TOBAC prostatic spermine-binding protein-like OS=Nicotiana tabacum OX=4097 GN=LOC107800018 PE=4 SV=1	disorder_prediction; FAMILY NOT NAMED; FvH4_4g20460.t1_v4.0.a2	NA	NA
IR_8786	2.95401	0.0413903	Fvb7:5383953-5384654	Fvb7	5380892	5382694	FvH4_7g04980	-	1259	Upstream TSS	6.65971	7.65663e-11	PREDICTED: uncharacterized protein LOC101290890 [Fragaria vesca subsp. vesca]	NA	NA	NA
IR_3372	2.97551	0.0046222	Fvb3:22267019-22267416	Fvb3	22263703	22264183	FvH4_3g29142	+	2836	Downstream TTS	NA	NA	tr|A0A2P6Q8F7|A0A2P6Q8F7_ROSCH Uncharacterized protein OS=Rosa chinensis OX=74649 GN=RchiOBHm_Chr5g0024901 PE=4 SV=1	FvH4_3g29142.t1_v4.0.a2	NA	NA
IR_2977	2.97831	0.0173433	Fvb3:15342483-15342871	Fvb3	15344619	15347242	FvH4_3g22321	+	1749	Upstream TSS	1.4805	0.0125072	AT1G32120.1 | serine/threonine-protein phosphatase 7 long form-like protein | Chr1:11552926-11555942 FORWARD LENGTH=978 | 201606; PREDICTED: uncharacterized protein LOC105350524 [Fragaria vesca subsp. vesca]; tr|A0A2P6QC30|A0A2P6QC30_ROSCH Uncharacterized protein OS=Rosa chinensis OX=74649 GN=RchiOBHm_Chr5g0038781 PE=4 SV=1	AminoTfrase-like_pln_mobile; AMINOTRANSFERASE-LIKE, PLANT MOBILE DOMAIN FAMILY PROTEIN; Coil; disorder_prediction; FAMILY NOT NAMED; FvH4_3g22321.t1_v4.0.a2; PMD	NA	NA
IR_2977	2.97831	0.0173433	Fvb3:15342483-15342871	Fvb3	15339842	15340620	FvH4_3g22310	+	1863	Downstream TTS	NA	NA	NA	FvH4_3g22310.t1_v4.0.a2	NA	NA
IR_3894	2.98324	0.038153	Fvb3:33687413-33687866	Fvb3	33683238	33686690	FvH4_3g39710	-	723	Upstream TSS	-7.32118	1.95955e-13	AT1G07010.1 | Calcineurin-like metallo-phosphoesterase superfamily protein | Chr1:2152949-2154968 FORWARD LENGTH=389 | 201606; PREDICTED: uncharacterized protein At1g18480 isoform X1 [Fragaria vesca subsp. vesca]; sp|Q8L774|SLP1_ARATH Shewanella-like protein phosphatase 1 OS=Arabidopsis thaliana OX=3702 GN=SLP1 PE=1 SV=1; tr|A0A2P6QKF6|A0A2P6QKF6_ROSCH Uncharacterized protein OS=Rosa chinensis OX…	Calcineurin-like_PHP_ApaH; FAMILY NOT NAMED; FvH4_3g39710.t1_v4.0.a2; hydrolase activity; Metallo-dependent phosphatases; Metallophos; MPP_Shelphs; Ser/Thr-sp_prot-phosphatase; SHEWANELLA-LIKE PROTEIN PHOSPHATASE 1; STPHPHTASE; T cell receptor signaling pathway; Th1 and Th2 cell differentiation	hydrolase activity	GO:0016787
IR_3894	2.98324	0.038153	Fvb3:33687413-33687866	Fvb3	33688174	33695252	FvH4_3g39711	-	309	Downstream TTS	2.25626	0.0564461	NA	FvH4_3g39711.t1_v4.0.a2	NA	NA
IR_7788	3.02583	0.0160063	Fvb6:22115225-22115667	Fvb6	22116256	22123581	FvH4_6g28670	+	590	Upstream TSS	-1.75365	0.000307769	AT1G15960.1 | NRAMP metal ion transporter 6 | Chr1:5482202-5485066 REVERSE LENGTH=527 | 201606; metal transporter Nramp6 isoform X1 [Rosa chinensis] &gt;gi|1365972475|ref|XP_024185382.1| metal transporter Nramp6 isoform X1 [Rosa chinensis] &gt;gi|1365972477|ref|XP_024185383.1| metal transporter Nramp6 isoform X1 [Rosa chinensis] &gt;gi|1358175953|gb|PRQ50428.1| putative NRAMP family protein [Rosa…	FvH4_6g28670.t1_v4.0.a2; FvH4_6g28670.t2_v4.0.a2; membrane; Metal ion SLC transporters; metal ion transmembrane transporter activity; metal ion transport; METAL TRANSPORTER NRAMP6; NATRESASSCMP; Nramp; NRAMP; NRAMP_fam; SOLUTE CARRIER PROTEIN FAMILY 11 MEMBER; TIGR01197	membrane; metal ion transmembrane transporter activity; metal ion transport	GO:0016020; GO:0030001; GO:0046873
IR_3962	3.08032	0.00293363	Fvb3:34790512-34790833	Fvb3	34792746	34797971	FvH4_3g41430	+	1914	Upstream TSS	2.81794	7.03134e-10	AT5G56270.1 | WRKY DNA-binding protein 2 | Chr5:22780816-22783137 FORWARD LENGTH=687 | 201606; PREDICTED: probable WRKY transcription factor 2 [Fragaria vesca subsp. vesca] &gt;gi|764562995|ref|XP_011461536.1| PREDICTED: probable WRKY transcription factor 2 [Fragaria vesca subsp. vesca] &gt;gi|764562999|ref|XP_011461537.1| PREDICTED: probable WRKY transcription factor 2 [Fragaria vesca subsp. ves…	disorder_prediction; DNA-binding transcription factor activity; FAMILY NOT NAMED; FvH4_3g41430.t1_v4.0.a2; FvH4_3g41430.t2_v4.0.a2; FvH4_3g41430.t3_v4.0.a2; FvH4_3g41430.t4_v4.0.a2; regulation of transcription, DNA-templated; sequence-specific DNA binding; WRKY; WRKY DNA-binding domain; WRKY_dom; WRKY_dom_sf; WRKY TRANSCRIPTION FACTOR 2-RELATED	DNA-binding transcription factor activity; regulation of DNA-templated transcription; sequence-specific DNA binding	GO:0003700; GO:0006355; GO:0043565
IR_6315	3.21362	0.000418571	Fvb5:20219971-20220475	Fvb5	20223374	20227461	FvH4_5g29160	-	2900	Downstream TTS	-0.228056	0.595607	AT2G26030.3 | F-box/RNI-like/FBD-like domains-containing protein | Chr2:11091505-11093000 REVERSE LENGTH=442 | 201606; PREDICTED: F-box/LRR-repeat protein At4g14103-like isoform X1 [Fragaria vesca subsp. vesca]; sp|Q8H1M0|FDL16_ARATH F-box/FBD/LRR-repeat protein At2g26030 OS=Arabidopsis thaliana OX=3702 GN=At2g26030 PE=2 SV=2; tr|A0A2P6P5R7|A0A2P6P5R7_ROSCH Putative F-box domain, leucine-rich rep…	FAMILY NOT NAMED; F-box; FBOX; F-box_dom; F-box domain; F-box-like_dom_sf; FvH4_5g29160.t1_v4.0.a2; FvH4_5g29160.t2_v4.0.a2; FvH4_5g29160.t3_v4.0.a2; FvH4_5g29160.t4_v4.0.a2; LRR_dom_sf; protein binding; RNI-like; ""> <signature-library-release library=	protein binding	GO:0005515
IR_4815	3.22081	0.00304756	Fvb4:18531992-18532365	Fvb4	18530144	18530938	FvH4_4g14930	-	1054	Upstream TSS	NA	NA	AT2G20980.1 | minichromosome maintenance 10 | Chr2:9011654-9013856 REVERSE LENGTH=396 | 201606; PREDICTED: protein MCM10 homolog [Fragaria vesca subsp. vesca]; sp|Q0VBD2|MCM10_MOUSE Protein MCM10 homolog OS=Mus musculus OX=10090 GN=Mcm10 PE=1 SV=1; tr|A0A2P6PKY0|A0A2P6PKY0_ROSCH Putative Zinc finger, Mcm10/DnaG-type OS=Rosa chinensis OX=74649 GN=RchiOBHm_Chr6g0251921 PE=4 SV=1	Activation of ATR in response to replication stress; Activation of the pre-replicative complex; DNA replication initiation; double-stranded DNA binding; FAMILY NOT NAMED; FvH4_4g14930.t1_v4.0.a2; Mcm10; single-stranded DNA binding	DNA replication initiation; double-stranded DNA binding; single-stranded DNA binding	GO:0003690; GO:0003697; GO:0006270
IR_7900	3.23298	0.00489977	Fvb6:24397099-24397382	Fvb6	24397656	24401768	FvH4_6g31240	+	275	Upstream TSS	1.96983	0.000556214	AT4G19640.1 | Ras-related small GTP-binding family protein | Chr4:10687441-10689449 REVERSE LENGTH=200 | 201606; PREDICTED: ras-related protein RHN1-like [Fragaria vesca subsp. vesca]; sp|P31583|RHN1_NICPL Ras-related protein RHN1 OS=Nicotiana plumbaginifolia OX=4092 GN=RHN1 PE=2 SV=1; tr|A0A2P6RWQ9|A0A2P6RWQ9_ROSCH Putative small GTPase superfamily, P-loop containing nucleoside triphosphate hydr…	FAMILY NOT NAMED; FvH4_6g31240.t1_v4.0.a2; FvH4_6g31240.t2_v4.0.a2; GTPase activity; GTP binding; P-loop containing nucleoside triphosphate hydrolases; P-loop_NTPase; RAB; Rab5_related; Ras; RASTRNSFRMNG; ""> <signature-library-release library=; Small_GTPase; Small_GTP-bd_dom; TIGR00231	GTPase activity; GTP binding	GO:0003924; GO:0005525
IR_1739	3.25101	0.00489459	Fvb2:13603711-13604185	Fvb2	13605799	13609098	FvH4_2g15460	+	1615	Upstream TSS	NA	NA	AT2G16910.1 | basic helix-loop-helix (bHLH) DNA-binding superfamily protein | Chr2:7331721-7334077 FORWARD LENGTH=571 | 201606; PREDICTED: transcription factor ABORTED MICROSPORES-like isoform X2 [Fragaria vesca subsp. vesca]; sp|Q9ZVX2|AMS_ARATH Transcription factor ABORTED MICROSPORES OS=Arabidopsis thaliana OX=3702 GN=AMS PE=1 SV=2; tr|A0A2P6PSS1|A0A2P6PSS1_ROSCH Putative transcription factor …	ACT_UUR-ACR-like; BHLH; bHLH_dom; bHLH-MYC_N; Coil; disorder_prediction; FAMILY NOT NAMED; FvH4_2g15460.t1_v4.0.a2; HLH; HLH_DNA-bd_sf; HLH, helix-loop-helix DNA-binding domain; MYC/MYB_N; protein dimerization activity; TRANSCRIPTION FACTOR ABORTED MICROSPORES	protein dimerization activity	GO:0046983
IR_8173	3.28586	0.00373735	Fvb6:29564942-29565290	Fvb6	29567050	29574209	FvH4_6g37550	+	1761	Upstream TSS	-7.73933	2.42029e-18	AT1G07650.1 | Leucine-rich repeat transmembrane protein kinase | Chr1:2359817-2366423 REVERSE LENGTH=1014 | 201606; PREDICTED: probable LRR receptor-like serine/threonine-protein kinase At1g07650 isoform X1 [Fragaria vesca subsp. vesca]; sp|C0LGE0|Y1765_ARATH Probable LRR receptor-like serine/threonine-protein kinase At1g07650 OS=Arabidopsis thaliana OX=3702 GN=At1g07650 PE=1 SV=1; tr|A0A2P6RZW7|…	ATP binding; Coil; FAMILY NOT NAMED; FvH4_6g37550.t1_v4.0.a2; Kinase-like_dom_sf; L domain-like; Leu-rich_rpt; LRR_8; LRR_dom_sf; Malectin; Malectin_dom; Neutrophil degranulation; N-glycan trimming in the ER and Calnexin/Calreticulin cycle; Pkinase_Tyr; protein binding; protein kinase activity; PROTEIN_KINASE_ATP; Protein_kinase_ATP_BS; PROTEIN_KINASE_DOM; Protein kinase-like (PK-like); PROTEIN_K…	ATP binding; protein binding; protein kinase activity; protein phosphorylation	GO:0004672; GO:0005515; GO:0005524; GO:0006468
IR_8499	3.28762	1.7566e-05	Fvb6:37841256-37841670	Fvb6	37837791	37841234	FvH4_6g50950	+	22	Downstream TTS	-1.39957	0.00152769	AT5G14660.3 | peptide deformylase 1B | Chr5:4727129-4728671 REVERSE LENGTH=273 | 201606; PREDICTED: peptide deformylase 1B, chloroplastic/mitochondrial [Fragaria vesca subsp. vesca] &gt;gi|764618693|ref|XP_011468274.1| PREDICTED: peptide deformylase 1B, chloroplastic/mitochondrial [Fragaria vesca subsp. vesca]; sp|Q9FUZ2|DEF1B_ARATH Peptide deformylase 1B, chloroplastic/mitochondrial OS=Arabidops…	NA	NA	NA
IR_3025	3.31319	0.000656836	Fvb3:16490110-16490486	Fvb3	16484001	16489567	FvH4_3g23480	+	543	Downstream TTS	-0.64729	3.09983e-05	AT3G20290.3 | EPS15 homology domain 1 | Chr3:7075057-7078655 REVERSE LENGTH=545 | 201606; PREDICTED: EH domain-containing protein 1 isoform X2 [Fragaria vesca subsp. vesca]; sp|Q94CF0|EHD1_ARATH EH domain-containing protein 1 OS=Arabidopsis thaliana OX=3702 GN=EHD1 PE=1 SV=1; tr|A0A2P6QCS4|A0A2P6QCS4_ROSCH Putative EH domain-containing protein OS=Rosa chinensis OX=74649 GN=RchiOBHm_Chr5g0041321 P…	calcium ion binding; Coil; DUF5600; Dynamin_N; Dynamin_SF; EF-hand; EF_HAND_2; EF-hand_4; EF_hand_dom; EF-hand-dom_pair; EH; EHD; EHD_N; EH_dom; EH DOMAIN; FvH4_3g23480.t1_v4.0.a2; G_DYNAMIN_2; G_DYNAMIN_dom; GTP binding; P-loop containing nucleoside triphosphate hydrolases; P-loop_NTPase; protein binding; ""> <signature-library-release library=	calcium ion binding; GTP binding; protein binding	GO:0005509; GO:0005515; GO:0005525
IR_1910	3.43262	0.0444819	Fvb2:16678365-16678699	Fvb2	16680723	16681363	FvH4_2g19740	+	2025	Upstream TSS	NA	NA	AT4G29037.1 | plant self-incompatibility protein S1 family protein | Chr4:14311498-14312128 FORWARD LENGTH=166 | 201606; sp|Q40975|S1_PAPRH Self-incompatibility protein S1 OS=Papaver rhoeas OX=33128 GN=S1 PE=1 SV=1; tr|A0A061DMI7|A0A061DMI7_THECC Uncharacterized protein OS=Theobroma cacao OX=3641 GN=TCM_003121 PE=4 SV=1; Uncharacterized protein TCM_003121 [Theobroma cacao]	FAMILY NOT NAMED; FvH4_2g19740.t1_v4.0.a2; Self-incomp_S1	NA	NA
IR_5953	3.45401	0.000278472	Fvb5:12506029-12506425	Fvb5	12500415	12503318	FvH4_5g20900	+	2711	Downstream TTS	-0.0682301	0.896316	AT3G57150.1 | homologue of NAP57 | Chr3:21154255-21155952 REVERSE LENGTH=565 | 201606; PREDICTED: LOW QUALITY PROTEIN: H/ACA ribonucleoprotein complex subunit 4 [Fragaria vesca subsp. vesca]; sp|Q9LD90|CBF5_ARATH H/ACA ribonucleoprotein complex subunit 4 OS=Arabidopsis thaliana OX=3702 GN=CBF5 PE=1 SV=1; tr|A0A2P6P9I8|A0A2P6P9I8_ROSCH Putative tRNA pseudouridine(55) synthase OS=Rosa chinensis OX=…	CENTROMERE/MICROTUBULE BINDING PROTEIN CBF5; disorder_prediction; DKCLD; Dyskerin-like; FvH4_5g20900.t1_v4.0.a2; FvH4_5g20900.t2_v4.0.a2; FvH4_5g20900.t3_v4.0.a2; PsdUridine_synth_cat_dom_sf; PsdUridine_synth_N; Pseudouridine synthase; pseudouridine synthase activity; pseudouridine synthesis; PseudoU_synth_hDyskerin; PUA; PUA domain-like; PUA-like_sf; RNA binding; RNA modification; RNA processing…	pseudouridine synthase activity; pseudouridine synthesis; RNA binding; RNA modification; RNA processing	GO:0001522; GO:0003723; GO:0006396; GO:0009451; GO:0009982
IR_9195	3.49573	4.93741e-07	Fvb7:15464894-15465309	Fvb7	15467223	15471989	FvH4_7g18570	+	1915	Upstream TSS	17.8072	9.31738e-36	AT3G26040.1 | HXXXD-type acyl-transferase family protein | Chr3:9519741-9521069 FORWARD LENGTH=442 | 201606; PREDICTED: vinorine synthase-like [Fragaria vesca subsp. vesca]; sp|Q70PR7|VINSY_RAUSE Vinorine synthase OS=Rauvolfia serpentina OX=4060 GN=ACT PE=1 SV=2; tr|A0A1J0CLC8|A0A1J0CLC8_FRAAN Alcohol acyltransferase OS=Fragaria ananassa OX=3747 GN=AAT PE=2 SV=1	NA	NA	NA
IR_9195	3.49573	4.93741e-07	Fvb7:15464894-15465309	Fvb7	15459592	15462054	FvH4_7g18550	+	2840	Downstream TTS	6.60147	0.000136975	AT3G54940.2 | Papain family cysteine protease | Chr3:20354402-20356127 FORWARD LENGTH=367 | 201606; probable cysteine protease RD19D [Rosa chinensis] &gt;gi|1358184243|gb|PRQ58717.1| putative cathepsin L [Rosa chinensis]; sp|Q8VYS0|RD19D_ARATH Probable cysteine protease RD19D OS=Arabidopsis thaliana OX=3702 GN=RD19D PE=2 SV=1; tr|A0A2P6SJ69|A0A2P6SJ69_ROSCH Putative cathepsin L OS=Rosa chinensis …	NA	NA	NA
IR_1549	3.49983	0.0380833	Fvb2:11032748-11033365	Fvb2	11035379	11040775	FvH4_2g12570	+	2015	Upstream TSS	-3.91046	0.000185368	AT5G09360.1 | laccase 14 | Chr5:2906426-2908658 REVERSE LENGTH=569 | 201606; PREDICTED: putative laccase-9 [Fragaria vesca subsp. vesca]; sp|Q6Z8L2|LAC9_ORYSJ Putative laccase-9 OS=Oryza sativa subsp. japonica OX=39947 GN=LAC9 PE=3 SV=1; tr|A0A2P6PRE3|A0A2P6PRE3_ROSCH Laccase OS=Rosa chinensis OX=74649 GN=RchiOBHm_Chr6g0273101 PE=3 SV=1	apoplast; copper ion binding; Cu-oxidase; Cu-oxidase_2; Cu-oxidase_3; Cupredoxin; Cupredoxins; CuRO_1_LCC; CuRO_1_LCC_plant; CuRO_2_LCC; CuRO_2_LCC_plant; FvH4_2g12570.t1_v4.0.a2; hydroquinone:oxygen oxidoreductase activity; Justicidin B biosynthesis; Laccase; lignin catabolic process; Matairesinol biosynthesis; MULTI-COPPER OXIDASE; oxidation-reduction process; oxidoreductase activity; Sesamin b…	apoplast; copper ion binding; hydroquinone:oxygen oxidoreductase activity; lignin catabolic process; obsolete oxidation-reduction process; oxidoreductase activity	GO:0005507; GO:0016491; GO:0046274; GO:0048046; GO:0052716; GO:0055114
IR_9396	3.53051	0.0301645	Fvb7:22030942-22031280	Fvb7	22033258	22034699	FvH4_7g30122	-	1979	Downstream TTS	-1.75921	0.00340464	AT1G01590.1 | ferric reduction oxidase 1 | Chr1:214229-217304 FORWARD LENGTH=704 | 201606; PREDICTED: ferric reduction oxidase 4-like isoform X1 [Fragaria vesca subsp. vesca]; sp|Q9FLW2|FRO5_ARATH Ferric reduction oxidase 5 OS=Arabidopsis thaliana OX=3702 GN=FRO5 PE=2 SV=1; tr|A0A2P6SN91|A0A2P6SN91_ROSCH Putative ferric-chelate reductase (NADH) OS=Rosa chinensis OX=74649 GN=RchiOBHm_Chr1g0378151 …	NA	NA	NA
IR_4964	3.58367	1.41682e-05	Fvb4:21740358-21740756	Fvb4	21738999	21739766	FvH4_4g17750	-	592	Upstream TSS	NA	NA	AT2G47810.1 | nuclear factor Y%2C subunit B5 | Chr2:19582938-19583420 REVERSE LENGTH=160 | 201606; PREDICTED: nuclear transcription factor Y subunit B-4-like [Fragaria vesca subsp. vesca]; sp|O82248|NFYB5_ARATH Nuclear transcription factor Y subunit B-5 OS=Arabidopsis thaliana OX=3702 GN=NFYB5 PE=1 SV=1; tr|A0A2P6QY85|A0A2P6QY85_ROSCH Putative transcription factor Hap3/NF-YB family OS=Rosa chinen…	Activation of gene expression by SREBF (SREBP); ATF4 activates genes in response to endoplasmic reticulum stress; ATF6 (ATF6-alpha) activates chaperone genes; CBFA_NFYB_domain; CBFD_NFYB_HMF; CCAAT-BINDING TRANSCRIPTION FACTOR-RELATED; CCAATSUBUNTA; disorder_prediction; FOXO-mediated transcription of cell death genes; FvH4_4g17750.t1_v4.0.a2; Histone-fold; NFYB_HAP3; nucleus; PPARA activates gene…	nucleus; protein heterodimerization activity; regulation of DNA-templated transcription; sequence-specific DNA binding	GO:0005634; GO:0006355; GO:0043565; GO:0046982
IR_2180	3.64757	0.0195385	Fvb2:23745294-23745837	Fvb2	23747665	23748799	FvH4_2g30760	+	1829	Upstream TSS	3.58648	0.189611	AT3G12660.1 | FASCICLIN-like arabinogalactan protein 14 precursor | Chr3:4019060-4019827 FORWARD LENGTH=255 | 201606; PREDICTED: fasciclin-like arabinogalactan protein 14 [Fragaria vesca subsp. vesca]; sp|Q9LTW9|FLA14_ARATH Fasciclin-like arabinogalactan protein 14 OS=Arabidopsis thaliana OX=3702 GN=FLA14 PE=2 SV=1; tr|A0A2P6Q1N4|A0A2P6Q1N4_ROSCH Putative fasciclin-like arabinogalactan protein OS…	disorder_prediction; FAMILY NOT NAMED; FAS1; FAS1 domain; FAS1_domain; FAS1_dom_sf; Fasciclin; FASCICLIN-LIKE ARABINOGALACTAN PROTEIN 5; FvH4_2g30760.t1_v4.0.a2; Plant_FLA	NA	NA
IR_2180	3.64757	0.0195385	Fvb2:23745294-23745837	Fvb2	23744383	23744815	FvH4_2g30750	+	479	Downstream TTS	NA	NA	fasciclin-like arabinogalactan protein 14 [Rosa chinensis]; tr|A0A2P6Q1N4|A0A2P6Q1N4_ROSCH Putative fasciclin-like arabinogalactan protein OS=Rosa chinensis OX=74649 GN=RchiOBHm_Chr6g0312141 PE=4 SV=1	disorder_prediction; FAMILY NOT NAMED; FASCICLIN-LIKE ARABINOGALACTAN PROTEIN 5; FvH4_2g30750.t1_v4.0.a2; Plant_FLA	NA	NA
IR_7888	3.70163	0.00186038	Fvb6:24191891-24192283	Fvb6	24186092	24189672	FvH4_6g31000	-	2219	Upstream TSS	0.885977	0.000150047	AT1G52380.4 | NUP50 (Nucleoporin 50 kDa) protein | Chr1:19509979-19511301 FORWARD LENGTH=440 | 201606; PREDICTED: nuclear pore complex protein NUP50A [Fragaria vesca subsp. vesca]; sp|Q9C829|NU50A_ARATH Nuclear pore complex protein NUP50A OS=Arabidopsis thaliana OX=3702 GN=NUP50A PE=1 SV=1; tr|A0A314Y115|A0A314Y115_PRUYE Nuclear pore complex protein NUP50A OS=Prunus yedoensis var. nudiflora OX=20…	Defective TPR may confer susceptibility towards thyroid papillary carcinoma (TPC); disorder_prediction; FvH4_6g31000.t1_v4.0.a2; intracellular transport; ISG15 antiviral mechanism; NEP/NS2 Interacts with the Cellular Export Machinery; NS1 Mediated Effects on Host Pathways; Nuclear import of Rev protein; nuclear pore; Nuclear Pore Complex (NPC) Disassembly; NUCLEAR PORE COMPLEX PROTEIN NUP50A-RELA…	intracellular transport; nuclear pore	GO:0005643; GO:0046907
IR_6046	3.70758	0.0313023	Fvb5:14549861-14550308	Fvb5	14543158	14549323	FvH4_5g23180	-	538	Upstream TSS	2.81458	4.73799e-11	AT1G32170.1 | xyloglucan endotransglucosylase/hydrolase 30 | Chr1:11575434-11577776 FORWARD LENGTH=343 | 201606; PREDICTED: probable xyloglucan endotransglucosylase/hydrolase protein 30 [Fragaria vesca subsp. vesca]; sp|Q38908|XTH30_ARATH Probable xyloglucan endotransglucosylase/hydrolase protein 30 OS=Arabidopsis thaliana OX=3702 GN=XTH30 PE=2 SV=2; tr|J9RV29|J9RV29_9ROSA Xyloglucan endotransglu…	apoplast; carbohydrate metabolic process; cellular glucan metabolic process; cell wall; cell wall biogenesis; ConA-like_dom_sf; Concanavalin A-like lectins/glucanases; disorder_prediction; EndGlu_transf; FAMILY NOT NAMED; FvH4_5g23180.t1_v4.0.a2; FvH4_5g23180.t2_v4.0.a2; GH16; GH16_1; GH16_2; GH16_AS; GH16_XET; Glyco_hydro_16; hydrolase activity, hydrolyzing O-glycosyl compounds; XET_C; XTH; XYLO…	apoplast; carbohydrate metabolic process; cell wall; cell wall biogenesis; hydrolase activity, hydrolyzing O-glycosyl compounds; obsolete cellular glucan metabolic process; xyloglucan metabolic process; xyloglucan:xyloglucosyl transferase activity	GO:0004553; GO:0005618; GO:0005975; GO:0006073; GO:0010411; GO:0016762; GO:0042546; GO:0048046
IR_6071	3.70789	0.000735967	Fvb5:15250949-15251368	Fvb5	15254307	15258330	FvH4_5g23970	-	2940	Downstream TTS	-1.24055	0.0125283	AT1G08400.1 | RINT-1 / TIP-1 family | Chr1:2643348-2646005 REVERSE LENGTH=804 | 201606; PREDICTED: RINT1-like protein MAG2L [Fragaria vesca subsp. vesca]; sp|Q8GXP1|MAG2L_ARATH RINT1-like protein MAG2L OS=Arabidopsis thaliana OX=3702 GN=MAG2L PE=2 SV=1; tr|A0A2P6PB03|A0A2P6PB03_ROSCH Uncharacterized protein OS=Rosa chinensis OX=74649 GN=RchiOBHm_Chr7g0213411 PE=4 SV=1	COPI-dependent Golgi-to-ER retrograde traffic; endoplasmic reticulum; FvH4_5g23970.t1_v4.0.a2; Golgi vesicle transport; RAD50-INTERACTING PROTEIN 1 RINT-1; RINT1-LIKE PROTEIN MAG2; RINT1_TIP1; RINT1_Tip20; RINT1_TIP20	endoplasmic reticulum; Golgi vesicle transport	GO:0005783; GO:0048193
IR_7543	3.76031	0.00112591	Fvb6:18279308-18279694	Fvb6	18282554	18285274	FvH4_6g24260	+	2861	Upstream TSS	NA	NA	AT3G21090.1 | ABC-2 type transporter family protein | Chr3:7391497-7394933 REVERSE LENGTH=691 | 201606; PREDICTED: ABC transporter G family member 15-like isoform X1 [Fragaria vesca subsp. vesca]; sp|Q8RWI9|AB15G_ARATH ABC transporter G family member 15 OS=Arabidopsis thaliana OX=3702 GN=ABCG15 PE=2 SV=2; tr|A0A2P6REE6|A0A2P6REE6_ROSCH Putative sulfate-transporting ATPase OS=Rosa chinensis OX=746…	ABC2_membrane; ABC_2_trans; ABC_tran; ABC_transporter-like; ABC transporters in lipid homeostasis; ATPase activity; ATP binding; ATP-BINDING CASSETTE TRANSPORTER; FvH4_6g24260.t1_v4.0.a2; membrane; P-loop containing nucleoside triphosphate hydrolases; P-loop_NTPase; ""> <signature-library-release library=	ATP binding; ATP hydrolysis activity; membrane	GO:0005524; GO:0016020; GO:0016887
IR_4105	3.76957	4.37057e-07	Fvb4:474662-474845	Fvb4	475826	478208	FvH4_4g00530	+	982	Upstream TSS	NA	NA	AT3G22980.3 | Ribosomal protein S5/Elongation factor G/III/V family protein | Chr3:8160269-8163316 REVERSE LENGTH=1015 | 201606; putative protein-synthesizing GTPase [Rosa chinensis]; sp|Q7Z2Z2|EFL1_HUMAN Elongation factor-like GTPase 1 OS=Homo sapiens OX=9606 GN=EFL1 PE=1 SV=2; tr|A0A2P6PRW3|A0A2P6PRW3_ROSCH Uncharacterized protein OS=Rosa chinensis OX=74649 GN=RchiOBHm_Chr6g0274771 PE=4 SV=1	disorder_prediction; FAMILY NOT NAMED; FvH4_4g00530.t1_v4.0.a2; ""> <signature-library-release library=	NA	NA
IR_4105	3.76957	4.37057e-07	Fvb4:474662-474845	Fvb4	466457	474236	FvH4_4g00520	+	426	Downstream TTS	1.33432	0.000391826	AT2G32700.6 | LEUNIG-like protein | Chr2:13867235-13871844 FORWARD LENGTH=785 | 201606; PREDICTED: transcriptional corepressor LEUNIG [Fragaria vesca subsp. vesca] &gt;gi|764570217|ref|XP_011462525.1| PREDICTED: transcriptional corepressor LEUNIG [Fragaria vesca subsp. vesca]; sp|O48847|LUH_ARATH Transcriptional corepressor LEUNIG_HOMOLOG OS=Arabidopsis thaliana OX=3702 GN=LUH PE=1 SV=1; tr|A0A2P…	Coil; disorder_prediction; FAMILY NOT NAMED; FvH4_4g00520.t1_v4.0.a2; G-protein_beta_WD-40_rep; GPROTEINBRPT; LisH; protein binding; TRANSCRIPTIONAL COREPRESSOR LEUNIG_HOMOLOG; WD40; WD40_repeat; WD40_repeat_CS; WD40_repeat_dom; WD40_repeat_dom_sf; WD40 repeat-like; WD40/YVTN_repeat-like_dom_sf; WD_REPEATS_1; WD_REPEATS_2; WD_REPEATS_REGION	protein binding	GO:0005515
IR_8993	3.77386	0.0101315	Fvb7:10521691-10522102	Fvb7	10515007	10519257	FvH4_7g11300	-	2434	Upstream TSS	2.67168	3.22921e-06	AT1G20770.1 | coiled-coil protein | Chr1:7215345-7216648 REVERSE LENGTH=215 | 201606; PREDICTED: coiled-coil domain-containing protein 115 isoform X1 [Fragaria vesca subsp. vesca]; tr|A0A2P6SFT4|A0A2P6SFT4_ROSCH Uncharacterized protein OS=Rosa chinensis OX=74649 GN=RchiOBHm_Chr1g0349471 PE=4 SV=1	NA	NA	NA
IR_8943	3.78435	0.0119707	Fvb7:9550811-9551225	Fvb7	9552219	9553071	FvH4_7g10112	-	995	Downstream TTS	NA	NA	AT3G11010.6 | receptor like protein 34 | Chr3:3450988-3453672 REVERSE LENGTH=861 | 201606; PREDICTED: receptor-like protein 12 [Fragaria vesca subsp. vesca]; sp|Q9SRL2|RLP34_ARATH Receptor-like protein 34 OS=Arabidopsis thaliana OX=3702 GN=RLP34 PE=2 SV=1; tr|A0A2P6SDE3|A0A2P6SDE3_ROSCH Putative leucine-rich repeat-containing, plant-type, leucine-rich repeat domain, L OS=Rosa chinensis OX=74649 G…	NA	NA	NA
IR_8943	3.78435	0.0119707	Fvb7:9550811-9551225	Fvb7	9553160	9553959	FvH4_7g10113	-	1936	Downstream TTS	NA	NA	AT2G33060.1 | receptor like protein 27 | Chr2:14025661-14028087 FORWARD LENGTH=808 | 201606; receptor like protein 7-like [Rosa chinensis] &gt;gi|1358182237|gb|PRQ56711.1| putative leucine-rich repeat-containing, plant-type, leucine-rich repeat domain, L [Rosa chinensis]; sp|F4IUU1|RLP27_ARATH Receptor like protein 27 OS=Arabidopsis thaliana OX=3702 GN=RLP27 PE=2 SV=1; tr|A0A2P6SDE3|A0A2P6SDE3_RO…	NA	NA	NA
IR_8943	3.78435	0.0119707	Fvb7:9550811-9551225	Fvb7	9554188	9557010	FvH4_7g10114	-	2964	Downstream TTS	NA	NA	AT1G47890.1 | receptor like protein 7 | Chr1:17643976-17647035 FORWARD LENGTH=1019 | 201606; PREDICTED: putative receptor-like protein kinase At3g47110 [Prunus mume]; sp|Q9C699|RLP7_ARATH Receptor-like protein 7 OS=Arabidopsis thaliana OX=3702 GN=RLP7 PE=3 SV=2; tr|A0A2P6SFB7|A0A2P6SFB7_ROSCH Putative leucine-rich repeat-containing, plant-type, leucine-rich repeat domain, L OS=Rosa chinensis OX=7…	NA	NA	NA
IR_2828	3.85181	0.00910305	Fvb3:12089538-12089823	Fvb3	12091583	12095505	FvH4_3g18830	+	1761	Upstream TSS	NA	NA	AT5G27100.1 | glutamate receptor 2.1 | Chr5:9535160-9538311 REVERSE LENGTH=901 | 201606; PREDICTED: glutamate receptor 2.8-like [Fragaria vesca subsp. vesca]; sp|O04660|GLR21_ARATH Glutamate receptor 2.1 OS=Arabidopsis thaliana OX=3702 GN=GLR2.1 PE=2 SV=2; tr|A0A2P6QA74|A0A2P6QA74_ROSCH Glutamate receptor OS=Rosa chinensis OX=74649 GN=RchiOBHm_Chr5g0031641 PE=3 SV=1	ANF_lig-bd_rcpt; ANF_receptor; FvH4_3g18830.t1_v4.0.a2; GluR_Plant; IGluLR_plant; IONOTROPIC GLUTAMATE RECEPTOR; ionotropic glutamate receptor activity; Iontropic_Glu_rcpt_pln; Iontro_rcpt; Lig_chan; membrane; PBP1_GABAb_receptor; Peripla_BP_I; Periplasmic binding protein-like I; Periplasmic binding protein-like II; SBP_bac_3; ""> <signature-library-release library=; Solute-binding_3/MltF_N	glutamate-gated receptor activity; membrane	GO:0004970; GO:0016020
IR_8388	3.90733	0.00143084	Fvb6:34301905-34302297	Fvb6	34298579	34299291	FvH4_6g44540	-	2614	Upstream TSS	NA	NA	AT3G63310.1 | Bax inhibitor-1 family protein | Chr3:23387938-23388882 REVERSE LENGTH=239 | 201606; PREDICTED: BI1-like protein [Fragaria vesca subsp. vesca]; sp|Q9M1V9|LFG2_ARATH Protein LIFEGUARD 2 OS=Arabidopsis thaliana OX=3702 GN=LFG2 PE=2 SV=1; tr|A0A2P6PVT2|A0A2P6PVT2_ROSCH Uncharacterized protein OS=Rosa chinensis OX=74649 GN=RchiOBHm_Chr6g0290181 PE=3 SV=1	Bax1-I; Bax_inhibitor_1-related; BAX INHIBITOR-RELATED; FvH4_6g44540.t1_v4.0.a2; ""> <signature-library-release library=	NA	NA
IR_8388	3.90733	0.00143084	Fvb6:34301905-34302297	Fvb6	34304075	34304608	FvH4_6g44541	+	1779	Upstream TSS	NA	NA	AT4G16740.1 | terpene synthase 03 | Chr4:9407856-9410877 FORWARD LENGTH=565 | 201606; PREDICTED: tricyclene synthase EBOS, chloroplastic-like [Fragaria vesca subsp. vesca]; sp|B9T825|TPS12_RICCO Probable terpene synthase 12 OS=Ricinus communis OX=3988 GN=TPS12 PE=3 SV=1; tr|A0A2P6REV6|A0A2P6REV6_ROSCH Putative lyase OS=Rosa chinensis OX=74649 GN=RchiOBHm_Chr3g0484891 PE=3 SV=1	FAMILY NOT NAMED; FvH4_6g44541.t1_v4.0.a2; lyase activity; ""> <signature-library-release library=; Terpene_synth; terpene synthase activity; Terpene_synth_N; Terpene_synth_N_sf; Terpenoid_cyclase/PrenylTrfase; Terpenoid cyclases/Protein prenyltransferases	lyase activity; terpene synthase activity	GO:0010333; GO:0016829
IR_1209	3.91041	0.000249573	Fvb2:3827660-3828051	Fvb2	3825513	3826999	FvH4_2g04887	-	661	Upstream TSS	NA	NA	hypothetical protein RchiOBHm_Chr6g0254681 [Rosa chinensis]; tr|A0A2P6PLM7|A0A2P6PLM7_ROSCH Uncharacterized protein OS=Rosa chinensis OX=74649 GN=RchiOBHm_Chr6g0254681 PE=4 SV=1	NA	NA	NA
IR_1718	3.95902	0.00146305	Fvb2:13215902-13216144	Fvb2	13211303	13212979	FvH4_2g15041	-	2923	Upstream TSS	NA	NA	NA	FvH4_2g15041.t1_v4.0.a2	NA	NA
IR_1718	3.95902	0.00146305	Fvb2:13215902-13216144	Fvb2	13216895	13218958	FvH4_2g15050	+	752	Upstream TSS	-10.3215	4.57833e-10	AT2G02850.1 | plantacyanin | Chr2:826630-827720 REVERSE LENGTH=129 | 201606; PREDICTED: basic blue protein [Fragaria vesca subsp. vesca]; sp|Q8LG89|BABL_ARATH Basic blue protein OS=Arabidopsis thaliana OX=3702 GN=ARPN PE=2 SV=2; tr|A0A2P4K153|A0A2P4K153_QUESU Basic blue protein OS=Quercus suber OX=58331 GN=CFP56_15457 PE=4 SV=1	BlueCu_1_BS; COPPER_BLUE; Cu_bind_like; Cupredoxin; Cupredoxins; electron transfer activity; FAMILY NOT NAMED; FvH4_2g15050.t1_v4.0.a2; FvH4_2g15050.t2_v4.0.a2; Phytocyanin; PHYTOCYANIN; Phytocyanin_dom; Plantacyanin; ""> <signature-library-release library=	electron transfer activity	GO:0009055
IR_6897	3.96813	6.54336e-08	Fvb6:5073742-5073998	Fvb6	5075370	5076246	FvH4_6g08570	-	1373	Downstream TTS	-0.709922	0.66619	AT5G48670.1 | AGAMOUS-like 80 | Chr5:19738825-19739790 REVERSE LENGTH=321 | 201606; PREDICTED: agamous-like MADS-box protein AGL80 [Fragaria vesca subsp. vesca]; sp|Q9FJK3|AGL80_ARATH Agamous-like MADS-box protein AGL80 OS=Arabidopsis thaliana OX=3702 GN=AGL80 PE=1 SV=1; tr|A0A2P6R7W1|A0A2P6R7W1_ROSCH Putative transcription factor MADS-type1 family OS=Rosa chinensis OX=74649 GN=RchiOBHm_Chr3g0458…	AGAMOUS-LIKE MADS-BOX PROTEIN AGL80; Coil; disorder_prediction; DNA binding; DNA-binding transcription factor activity, RNA polymerase II-specific; Estrogen-dependent nuclear events downstream of ESR-membrane signaling; FvH4_6g08570.t1_v4.0.a2; MADS_BOX_2; MADS BOX PROTEIN; MADSDOMAIN; MADS_SRF-like; MADS_SRF_like; Myogenesis; positive regulation of transcription by RNA polymerase II; protein dim…	cis-regulatory region sequence-specific DNA binding; DNA binding; DNA-binding transcription factor activity, RNA polymerase II-specific; positive regulation of transcription by RNA polymerase II; protein dimerization activity	GO:0000981; GO:0000987; GO:0003677; GO:0045944; GO:0046983
IR_5998	3.97149	0.00166846	Fvb5:13432920-13433364	Fvb5	13431127	13431706	FvH4_5g22090	-	1214	Upstream TSS	6.45979	0.000432149	AT5G46770.1 | hypothetical protein | Chr5:18977494-18977895 FORWARD LENGTH=133 | 201606; PREDICTED: uncharacterized protein LOC105351901 [Fragaria vesca subsp. vesca]; tr|A0A2P6PA08|A0A2P6PA08_ROSCH Uncharacterized protein OS=Rosa chinensis OX=74649 GN=RchiOBHm_Chr7g0209741 PE=4 SV=1	FAMILY NOT NAMED; FvH4_5g22090.t1_v4.0.a2	NA	NA
IR_6790	3.98119	8.17331e-07	Fvb6:2208748-2209379	Fvb6	2207468	2207864	FvH4_6g04060	+	884	Downstream TTS	NA	NA	PREDICTED: TMV resistance protein N-like isoform X2 [Fragaria vesca subsp. vesca]; tr|A0A2P6RE29|A0A2P6RE29_ROSCH Uncharacterized protein OS=Rosa chinensis OX=74649 GN=RchiOBHm_Chr3g0481891 PE=4 SV=1	FvH4_6g04060.t1_v4.0.a2	NA	NA
IR_6790	3.98119	8.17331e-07	Fvb6:2208748-2209379	Fvb6	2212328	2213598	FvH4_6g04070	-	2950	Downstream TTS	NA	NA	putative DnaJ domain-containing protein [Rosa chinensis]; tr|A0A2P6R6I0|A0A2P6R6I0_ROSCH Putative DnaJ domain-containing protein OS=Rosa chinensis OX=74649 GN=RchiOBHm_Chr3g0453171 PE=4 SV=1	disorder_prediction; DNAJ HEAT SHOCK N-TERMINAL DOMAIN-CONTAINING PROTEIN; FAMILY NOT NAMED; FvH4_6g04070.t1_v4.0.a2	NA	NA
IR_7924	4.03103	0.00710563	Fvb6:25057114-25057545	Fvb6	25059574	25061812	FvH4_6g31950	+	2030	Upstream TSS	NA	NA	AT2G26490.1 | Transducin/WD40 repeat-like superfamily protein | Chr2:11268035-11269432 FORWARD LENGTH=465 | 201606; PREDICTED: vegetative incompatibility protein HET-E-1-like [Fragaria vesca subsp. vesca]; sp|O48716|JGB_ARATH Protein JINGUBANG OS=Arabidopsis thaliana OX=3702 GN=JGB PE=1 SV=1; tr|A0A2P6RX67|A0A2P6RX67_ROSCH Putative transcription factor WD40-like family OS=Rosa chinensis OX=74649 …	disorder_prediction; F-BOX AND WD40 DOMAIN PROTEIN; FvH4_6g31950.t1_v4.0.a2; G-protein_beta_WD-40_rep; GPROTEINBRPT; Nup160; protein binding; ""> <signature-library-release library=; WD40; WD40_repeat; WD40_repeat_dom; WD40_repeat_dom_sf; WD40 repeat-like; WD40/YVTN_repeat-like_dom_sf; WD_REPEATS_2; WD_REPEATS_REGION	protein binding	GO:0005515
IR_7761	4.06093	7.3336e-05	Fvb6:21799603-21799994	Fvb6	21796424	21798295	FvH4_6g28320	-	1308	Upstream TSS	NA	NA	leucine-rich repeat extensin-like protein 2 [Rosa chinensis] &gt;gi|1358175889|gb|PRQ50364.1| hypothetical protein RchiOBHm_Chr2g0132371 [Rosa chinensis]; tr|A0A2P6RVB5|A0A2P6RVB5_ROSCH Uncharacterized protein OS=Rosa chinensis OX=74649 GN=RchiOBHm_Chr2g0132371 PE=4 SV=1	disorder_prediction; FvH4_6g28320.t1_v4.0.a2	NA	NA
IR_5368	4.08357	0.00951985	Fvb4:31066824-31067210	Fvb4	31069365	31069737	FvH4_4g32420	+	2156	Upstream TSS	0.910891	0.0487515	PREDICTED: wiskott-Aldrich syndrome protein family member 2-like [Malus domestica]; tr|A0A2P6R3A4|A0A2P6R3A4_ROSCH Uncharacterized protein OS=Rosa chinensis OX=74649 GN=RchiOBHm_Chr4g0441281 PE=4 SV=1	disorder_prediction; FAMILY NOT NAMED; FvH4_4g32420.t1_v4.0.a2; HYDROXYPROLINE-RICH GLYCOPROTEIN FAMILY PROTEIN	NA	NA
IR_5368	4.08357	0.00951985	Fvb4:31066824-31067210	Fvb4	31063616	31064537	FvH4_4g32400	+	2287	Downstream TTS	2.06939	0.00730125	AT1G70990.1 | proline-rich family protein | Chr1:26767520-26768050 REVERSE LENGTH=176 | 201606; PREDICTED: protein trichome birefringence-like 32 [Fragaria vesca subsp. vesca]; tr|A0A2P6R3B7|A0A2P6R3B7_ROSCH Uncharacterized protein OS=Rosa chinensis OX=74649 GN=RchiOBHm_Chr4g0441241 PE=4 SV=1	disorder_prediction; FAMILY NOT NAMED; FvH4_4g32400.t1_v4.0.a2; ""> <signature-library-release library=	NA	NA
IR_1076	4.1302	6.99776e-06	Fvb2:867270-867684	Fvb2	870385	871745	FvH4_2g00813	+	2702	Upstream TSS	NA	NA	PREDICTED: protein FAR1-RELATED SEQUENCE 5-like [Fragaria vesca subsp. vesca]; tr|A0A2G5CLD2|A0A2G5CLD2_AQUCA Uncharacterized protein OS=Aquilegia coerulea OX=218851 GN=AQUCO_04600031v1 PE=4 SV=1	NA	NA	NA
IR_4646	4.13236	0.0322978	Fvb4:14637130-14637536	Fvb4	14638712	14656957	FvH4_4g10960	+	1177	Upstream TSS	0.358579	0.175171	AT2G43400.1 | electron-transfer flavoprotein:ubiquinone oxidoreductase | Chr2:18021304-18025041 FORWARD LENGTH=633 | 201606; PREDICTED: electron transfer flavoprotein-ubiquinone oxidoreductase, mitochondrial isoform X3 [Fragaria vesca subsp. vesca]; sp|O22854|ETFQO_ARATH Electron transfer flavoprotein-ubiquinone oxidoreductase, mitochondrial OS=Arabidopsis thaliana OX=3702 GN=ETFQO PE=2 SV=1; tr|…	4Fe-4S ferredoxins; ELECTRON TRANSFER FLAVOPROTEIN-UBIQUINONE OXIDOREDUCTASE; ELECTRON TRANSFER FLAVOPROTEIN-UBIQUINONE OXIDOREDUCTASE, MITOCHONDRIAL; electron-transferring-flavoprotein dehydrogenase activity; electron transport chain; ETF-QO; ETF_QO; FAD-linked reductases, C-terminal domain; FAD/NAD-bd_sf; FAD/NAD(P)-binding domain; FvH4_4g10960.t1_v4.0.a2; NAD_binding_8; Respiratory electron tr…	electron-transferring-flavoprotein dehydrogenase activity; electron transport chain	GO:0004174; GO:0022900
IR_8554	4.14639	0.0125401	Fvb6:39184210-39184903	Fvb6	39181677	39181969	FvH4_6g53440	-	2241	Upstream TSS	NA	NA	NA	NA	NA	NA
IR_8554	4.14639	0.0125401	Fvb6:39184210-39184903	Fvb6	39185361	39185884	FvH4_6g53450	-	459	Downstream TTS	NA	NA	AT3G27110.4 | Peptidase family M48 family protein | Chr3:9998006-9999554 FORWARD LENGTH=261 | 201606; tr|A0A314YYR2|A0A314YYR2_PRUYE Uncharacterized protein OS=Prunus yedoensis var. nudiflora OX=2094558 GN=Pyn_35413 PE=3 SV=1; uncharacterized protein LOC110764352 [Prunus avium]	NA	NA	NA
IR_3992	4.18788	5.87839e-05	Fvb3:35544474-35544764	Fvb3	35534308	35542101	FvH4_3g42551	+	2373	Downstream TTS	2.25736	0.425286	NA	FvH4_3g42551.t1_v4.0.a2	NA	NA
IR_5646	4.1884	0.0493095	Fvb5:4997111-4997463	Fvb5	4994545	4994889	FvH4_5g08700	+	2222	Downstream TTS	NA	NA	AT5G50690.1 | hydroxysteroid dehydrogenase 7 | Chr5:20621330-20622638 FORWARD LENGTH=299 | 201606; PREDICTED: 11-beta-hydroxysteroid dehydrogenase 1B-like [Fragaria vesca subsp. vesca]; sp|Q9LUF2|HSD4B_ARATH 11-beta-hydroxysteroid dehydrogenase-like 4B OS=Arabidopsis thaliana OX=3702 GN=HSD7 PE=2 SV=2; tr|A0A2P6P4S7|A0A2P6P4S7_ROSCH Putative oxidoreductase OS=Rosa chinensis OX=74649 GN=RchiOBHm_C…	FAMILY NOT NAMED; FvH4_5g08700.t1_v4.0.a2; NAD(P)-bd_dom_sf; NAD(P)-binding Rossmann-fold domains; ""> <signature-library-release library=	NA	NA
IR_5646	4.1884	0.0493095	Fvb5:4997111-4997463	Fvb5	4995019	4995726	FvH4_5g08710	+	1385	Downstream TTS	NA	NA	AT5G50700.1 | hydroxysteroid dehydrogenase 1 | Chr5:20623259-20624995 REVERSE LENGTH=349 | 201606; PREDICTED: 11-beta-hydroxysteroid dehydrogenase 1B-like [Fragaria vesca subsp. vesca]; sp|P0DKC6|HSD1B_ARATH 11-beta-hydroxysteroid dehydrogenase 1B OS=Arabidopsis thaliana OX=3702 GN=HSD1 PE=1 SV=1; tr|A0A2P6P4S7|A0A2P6P4S7_ROSCH Putative oxidoreductase OS=Rosa chinensis OX=74649 GN=RchiOBHm_Chr7g0…	adh_short; FAMILY NOT NAMED; FvH4_5g08710.t1_v4.0.a2; NAD(P)-bd_dom_sf; NAD(P)-binding Rossmann-fold domains; SDR_fam; ""> <signature-library-release library=	NA	NA
IR_4766	4.22445	3.7978e-05	Fvb4:17571941-17572234	Fvb4	17568702	17570683	FvH4_4g14031	-	1258	Upstream TSS	NA	NA	AT2G34930.1 | disease resistance family protein / LRR family protein | Chr2:14737169-14739886 REVERSE LENGTH=905 | 201606; PREDICTED: probable leucine-rich repeat receptor-like protein kinase At1g35710 [Fragaria vesca subsp. vesca]; sp|Q6JN46|EIX2_SOLLC Receptor-like protein EIX2 OS=Solanum lycopersicum OX=4081 GN=EIX2 PE=1 SV=2; tr|A0A251QGD3|A0A251QGD3_PRUPE Uncharacterized protein OS=Prunus pe…	FAMILY NOT NAMED; FvH4_4g14031.t1_v4.0.a2; Leu-rich_rpt; LRR_6; LRR_8; LRR_dom_sf; LRR_N_plant-typ; LRRNT_2; protein binding; RNI-like; ""> <signature-library-release library=	protein binding	GO:0005515
IR_7767	4.27972	0.0265587	Fvb6:21808563-21808955	Fvb6	21802960	21806146	FvH4_6g28330	+	2417	Downstream TTS	NA	NA	AT3G06240.1 | F-box family protein | Chr3:1887336-1888619 FORWARD LENGTH=427 | 201606; PREDICTED: F-box/kelch-repeat protein At3g06240-like [Fragaria vesca subsp. vesca] &gt;gi|764605739|ref|XP_011467007.1| PREDICTED: F-box/kelch-repeat protein At3g06240-like [Fragaria vesca subsp. vesca]; sp|Q8GXC7|FBK50_ARATH F-box/kelch-repeat protein At3g06240 OS=Arabidopsis thaliana OX=3702 GN=At3g06240 PE=2…	FAMILY NOT NAMED; FBA_1; F-box; FBOX; F-box-assoc_dom_typ1; F-box-assoc_interact_dom; F-box_dom; F-box domain; F-box-like_dom_sf; FvH4_6g28330.t1_v4.0.a2; Galactose oxidase, central domain; Gal_Oxase/kelch_b-propeller; protein binding; ""> <signature-library-release library=; TIGR01640	protein binding	GO:0005515
IR_3682	4.3127	0.00184887	Fvb3:29727356-29727761	Fvb3	29729955	29733169	FvH4_3g34260	-	2195	Downstream TTS	NA	NA	AT5G41460.1 | transferring glycosyl group transferase (DUF604) | Chr5:16589724-16592197 REVERSE LENGTH=524 | 201606; PREDICTED: uncharacterized protein LOC101307385 [Fragaria vesca subsp. vesca]; tr|A0A2P6QI03|A0A2P6QI03_ROSCH Putative N-acetylgalactosaminide beta-1,3-galactosyltransferase OS=Rosa chinensis OX=74649 GN=RchiOBHm_Chr5g0061811 PE=4 SV=1	DUF604; FRINGE-RELATED; FvH4_3g34260.t1_v4.0.a2; GLYCOSYLTRANSFERASE	NA	NA
IR_131	4.31492	2.54545e-05	Fvb1:4193539-4194195	Fvb1	4189471	4191750	FvH4_1g07930	+	1789	Downstream TTS	1.4833	2.75917e-05	AT5G57020.1 | myristoyl-CoA:protein N-myristoyltransferase | Chr5:23075451-23076755 FORWARD LENGTH=434 | 201606; PREDICTED: glycylpeptide N-tetradecanoyltransferase 1 [Fragaria vesca subsp. vesca]; sp|Q9LTR9|NMT1_ARATH Glycylpeptide N-tetradecanoyltransferase 1 OS=Arabidopsis thaliana OX=3702 GN=NMT1 PE=1 SV=2; tr|A0A2P6RKD8|A0A2P6RKD8_ROSCH Glycylpeptide N-tetradecanoyltransferase OS=Rosa chinen…	NA	NA	NA
IR_4368	4.3308	0.000684076	Fvb4:5619086-5619485	Fvb4	5620413	5621547	FvH4_4g06310	-	929	Downstream TTS	-7.76388	2.18117e-06	AT5G07610.1 | F-box family protein | Chr5:2406068-2407330 FORWARD LENGTH=420 | 201606; PREDICTED: F-box protein At5g07610-like [Fragaria vesca subsp. vesca]; sp|Q9FLS0|FB253_ARATH F-box protein At5g07610 OS=Arabidopsis thaliana OX=3702 GN=At5g07610 PE=2 SV=1; tr|A0A2P6QS92|A0A2P6QS92_ROSCH Putative F-box domain-containing protein OS=Rosa chinensis OX=74649 GN=RchiOBHm_Chr4g0398071 PE=4 SV=1	FAMILY NOT NAMED; F-box; F-box-assoc_interact_dom; F-box_dom; F-box domain; F-box-like_dom_sf; FvH4_4g06310.t1_v4.0.a2; protein binding; ""> <signature-library-release library=; TIGR01640	protein binding	GO:0005515
IR_4282	4.44012	0.0171911	Fvb4:3819270-3819670	Fvb4	3810618	3817194	FvH4_4g04470	-	2076	Upstream TSS	6.34492	2.34837e-06	AT3G04380.1 | SET-domain containing protein lysine methyltransferase family protein | Chr3:1161602-1164539 FORWARD LENGTH=492 | 201606; PREDICTED: histone-lysine N-methyltransferase SUVR1-like isoform X1 [Fragaria vesca subsp. vesca] &gt;gi|764568173|ref|XP_011462303.1| PREDICTED: histone-lysine N-methyltransferase SUVR1-like isoform X1 [Fragaria vesca subsp. vesca]; sp|Q8W595|SUVR4_ARATH Histone…	disorder_prediction; FAMILY NOT NAMED; FvH4_4g04470.t1_v4.0.a2; FvH4_4g04470.t4_v4.0.a2; FvH4_4g04470.t7_v4.0.a2; histone lysine methylation; histone-lysine N-methyltransferase activity; Lysine degradation; nucleus; PKMTs methylate histone lysines; Pre-SET; Pre-SET_dom; protein binding; SAM_MT43_3; SET; SET_dom; SET domain; SUVR4/1/2; WIYLD; WIYLD_domain; zinc ion binding	nucleus; obsolete histone lysine methylation; obsolete histone lysine N-methyltransferase activity; protein binding; zinc ion binding	GO:0005515; GO:0005634; GO:0008270; GO:0018024; GO:0034968
IR_1853	4.46326	2.00572e-06	Fvb2:15671287-15671749	Fvb2	15674037	15674730	FvH4_2g18271	-	2289	Downstream TTS	NA	NA	AT1G20560.2 | acyl activating enzyme 1 | Chr1:7119927-7121363 REVERSE LENGTH=478 | 201606; probable acyl-activating enzyme 1, peroxisomal [Rosa chinensis] &gt;gi|1358150212|gb|PRQ24691.1| putative 4-coumarate--CoA ligase [Rosa chinensis]; sp|F4HUK6|AAE1_ARATH Probable acyl-activating enzyme 1, peroxisomal OS=Arabidopsis thaliana OX=3702 GN=AAE1 PE=2 SV=1; tr|A0A2P6PS04|A0A2P6PS04_ROSCH Putative 4…	NA	NA	NA
IR_6736	4.47251	0.00165904	Fvb6:35571-35957	Fvb6	25083	34343	FvH4_6g00030	-	1228	Upstream TSS	0.540282	0.090174	AT1G65580.1 | Endonuclease/exonuclease/phosphatase family protein | Chr1:24377598-24383940 REVERSE LENGTH=1101 | 201606; PREDICTED: type II inositol 1,4,5-trisphosphate 5-phosphatase FRA3 [Fragaria vesca subsp. vesca]; sp|Q84W55|IP5PF_ARATH Type II inositol polyphosphate 5-phosphatase 15 OS=Arabidopsis thaliana OX=3702 GN=IP5P15 PE=1 SV=2; tr|A0A2P6R4X0|A0A2P6R4X0_ROSCH Putative phosphoinositide …	disorder_prediction; DNase I-like; Endo/exonuclease/phosphatase; Endo/exonu/phosph_ase_sf; Exo_endo_phos; FvH4_6g00030.t1_v4.0.a2; INOSITOL 5-PHOSPHATASE; INPP5c; protein binding; TYPE I INOSITOL POLYPHOSPHATE 5-PHOSPHATASE 12; WD40_repeat_dom_sf; WD40 repeat-like	protein binding	GO:0005515
IR_2842	4.50249	0.0173004	Fvb3:12443183-12443477	Fvb3	12436609	12441327	FvH4_3g19250	-	1856	Upstream TSS	-1.56363	0.00771245	AT3G15140.1 | Polynucleotidyl transferase%2C ribonuclease H-like superfamily protein | Chr3:5099712-5101717 REVERSE LENGTH=337 | 201606; PREDICTED: uncharacterized exonuclease domain-containing protein At3g15140 [Fragaria vesca subsp. vesca]; sp|Q8W566|Y3514_ARATH Uncharacterized exonuclease domain-containing protein At3g15140 OS=Arabidopsis thaliana OX=3702 GN=At3g15140 PE=2 SV=1; tr|A0A2P6QAE0|…	3'-5' EXONUCLEASE ERI1-RELATED; ERI-1_3'hExo_like; ERI1 EXORIBONUCLEASE 3; Exonuclease_RNaseT/DNA_pol3; FvH4_3g19250.t1_v4.0.a2; nucleic acid binding; Ribonuclease H-like; RNaseH-like_sf; RNaseH_sf; RNase_T	nucleic acid binding	GO:0003676
IR_4476	4.54599	4.78043e-05	Fvb4:8308819-8309243	Fvb4	8311145	8314101	FvH4_4g08370	-	1903	Downstream TTS	8.41998	5.03636e-08	AT5G05570.2 | transducin family protein / WD-40 repeat family protein | Chr5:1656766-1663728 FORWARD LENGTH=1099 | 201606; PREDICTED: uncharacterized protein LOC105350951 [Fragaria vesca subsp. vesca] &gt;gi|764568401|ref|XP_011462323.1| PREDICTED: uncharacterized protein LOC105350951 [Fragaria vesca subsp. vesca] &gt;gi|764568405|ref|XP_011462324.1| PREDICTED: uncharacterized protein LOC10535095…	FvH4_4g08370.t1_v4.0.a2; FvH4_4g08370.t3_v4.0.a2; FvH4_4g08370.t5_v4.0.a2; LETHAL 2 GIANT LARVAE PROTEIN; ""> <signature-library-release library=	NA	NA
IR_1676	4.61863	0.000282698	Fvb2:12658976-12659261	Fvb2	12657531	12658894	FvH4_2g14390	+	82	Downstream TTS	-4.7907	0.0027706	AT1G21340.1 | Dof-type zinc finger DNA-binding family protein | Chr1:7476087-7476869 FORWARD LENGTH=260 | 201606; PREDICTED: dof zinc finger protein DOF1.2 [Fragaria vesca subsp. vesca]; sp|P68349|DOF12_ARATH Dof zinc finger protein DOF1.2 OS=Arabidopsis thaliana OX=3702 GN=DOF1.2 PE=2 SV=1; tr|A0A1D6WJM1|A0A1D6WJM1_FRAAN ZnF-Dof-type transcription factor OS=Fragaria ananassa OX=3747 GN=Dof1 PE=2…	NA	NA	NA
IR_2077	4.69533	0.000222607	Fvb2:21341046-21341743	Fvb2	21344260	21348625	FvH4_2g26610	-	2518	Downstream TTS	0.798954	0.0788371	AT1G44835.2 | YbaK/aminoacyl-tRNA synthetase-associated domain-containing protein | Chr1:16939909-16942337 FORWARD LENGTH=308 | 201606; PREDICTED: prolyl-tRNA synthetase associated domain-containing protein 1 [Fragaria vesca subsp. vesca]; sp|Q6NRL0|PRXD1_XENLA Prolyl-tRNA synthetase associated domain-containing protein 1 OS=Xenopus laevis OX=8355 GN=prorsd1p PE=2 SV=1; tr|A0A2P6PX73|A0A2P6PX73_R…	NA	NA	NA
IR_8698	4.72102	0.000373585	Fvb7:3205389-3205981	Fvb7	3208758	3217208	FvH4_7g02900	+	2778	Upstream TSS	NA	NA	AT1G15120.1 | Ubiquinol-cytochrome C reductase hinge protein | Chr1:5203091-5203897 FORWARD LENGTH=69 | 201606; PREDICTED: cytochrome b-c1 complex subunit 6-like [Fragaria vesca subsp. vesca]; sp|P48504|QCR6_SOLTU Cytochrome b-c1 complex subunit 6 OS=Solanum tuberosum OX=4113 PE=1 SV=2; tr|A0A314XSR3|A0A314XSR3_PRUYE Cytochrome b-c1 complex subunit 6-like OS=Prunus yedoensis var. nudiflora OX=209…	NA	NA	NA
IR_8793	4.76628	4.36058e-06	Fvb7:5506847-5507543	Fvb7	5509308	5511859	FvH4_7g05130	+	1766	Upstream TSS	-0.610115	0.0727996	PREDICTED: uncharacterized protein LOC101313634 [Fragaria vesca subsp. vesca]; sp|P76093|YNBD_ECOLI Uncharacterized protein YnbD OS=Escherichia coli (strain K12) OX=83333 GN=ynbD PE=1 SV=1; tr|A0A2P6SBL1|A0A2P6SBL1_ROSCH Putative phosphoric monoester hydrolase OS=Rosa chinensis OX=74649 GN=RchiOBHm_Chr1g0331721 PE=4 SV=1	NA	NA	NA
IR_270	4.77371	0.0016618	Fvb1:8347335-8347787	Fvb1	8344180	8346096	FvH4_1g14900	+	1239	Downstream TTS	NA	NA	AT2G23620.1 | methyl esterase 1 | Chr2:10047462-10049248 REVERSE LENGTH=263 | 201606; PREDICTED: salicylic acid-binding protein 2-like [Fragaria vesca subsp. vesca]; sp|Q6RYA0|SABP2_TOBAC Salicylic acid-binding protein 2 OS=Nicotiana tabacum OX=4097 GN=SABP2 PE=1 SV=1; tr|A0A2P6RN11|A0A2P6RN11_ROSCH Putative 3-oxolaurate decarboxylase OS=Rosa chinensis OX=74649 GN=RchiOBHm_Chr2g0103951 PE=4 SV=1	AB_hydrolase; AB_hydrolase_1; Abhydrolase_6; ALPHA/BETA HYDROLASE FOLD-CONTAINING PROTEIN; alpha/beta-Hydrolases; FvH4_1g14900.t1_v4.0.a2; ""> <signature-library-release library=	NA	NA
IR_8831	4.79432	0.0196273	Fvb7:6623836-6624452	Fvb7	6626529	6629209	FvH4_7g06630	+	2078	Upstream TSS	0.697927	0.0501591	AT5G04760.1 | Duplicated homeodomain-like superfamily protein | Chr5:1373752-1374529 REVERSE LENGTH=215 | 201606; PREDICTED: transcription factor DIVARICATA [Fragaria vesca subsp. vesca]; sp|Q8S9H7|DIV_ANTMA Transcription factor DIVARICATA OS=Antirrhinum majus OX=4151 GN=DIVARICATA PE=2 SV=1; tr|A0A2P6SCI3|A0A2P6SCI3_ROSCH Putative transcription factor MYB/SANT family OS=Rosa chinensis OX=74649 G…	NA	NA	NA
IR_1907	4.84054	0.00305894	Fvb2:16655595-16655795	Fvb2	16652562	16653150	FvH4_2g19710	+	2445	Downstream TTS	NA	NA	tr|A0A2P6PT67|A0A2P6PT67_ROSCH Uncharacterized protein OS=Rosa chinensis OX=74649 GN=RchiOBHm_Chr6g0280231 PE=4 SV=1	disorder_prediction; FvH4_2g19710.t1_v4.0.a2	NA	NA
IR_4695	4.94699	0.0092269	Fvb4:16448098-16448529	Fvb4	16443653	16445519	FvH4_4g12772	-	2579	Upstream TSS	NA	NA	PREDICTED: uncharacterized protein LOC103446245 [Malus domestica]; tr|A0A314Y0C1|A0A314Y0C1_PRUYE Uncharacterized protein OS=Prunus yedoensis var. nudiflora OX=2094558 GN=Pyn_25985 PE=4 SV=1	disorder_prediction; FAMILY NOT NAMED; FvH4_4g12772.t1_v4.0.a2; ""> <signature-library-release library=	NA	NA
IR_4695	4.94699	0.0092269	Fvb4:16448098-16448529	Fvb4	16448758	16452150	FvH4_4g12773	-	230	Downstream TTS	NA	NA	PREDICTED: uncharacterized protein LOC101292758 [Fragaria vesca subsp. vesca]; tr|Q2RB37|Q2RB37_ORYSJ Transposon protein, putative, CACTA, En/Spm sub-class OS=Oryza sativa subsp. japonica OX=39947 GN=LOC_Os11g03330 PE=4 SV=1	disorder_prediction; DUF4216; DUF4218; FvH4_4g12773.t1_v4.0.a2; ""> <signature-library-release library=; Transposase_21; UNCHARACTERIZED	NA	NA
IR_2171	5.0583	1.13909e-13	Fvb2:23572870-23573412	Fvb2	23565710	23570420	FvH4_2g30381	+	2450	Downstream TTS	5.18107	6.32532e-07	PREDICTED: MATH and LRR domain-containing protein PFE0570w-like [Fragaria vesca subsp. vesca]	disorder_prediction; FvH4_2g30381.t1_v4.0.a2	NA	NA
IR_7558	5.06515	0.0406051	Fvb6:18512137-18512432	Fvb6	18513341	18514377	FvH4_6g24400	-	910	Downstream TTS	NA	NA	NA	disorder_prediction; FvH4_6g24400.t1_v4.0.a2	NA	NA
IR_718	5.07673	0.00140494	Fvb1:17511728-17512178	Fvb1	17513529	17518240	FvH4_1g25670	+	1352	Upstream TSS	-2.81127	2.65152e-13	AT4G39630.1 | translation initiation factor | Chr4:18397749-18399263 REVERSE LENGTH=233 | 201606; PREDICTED: uncharacterized protein LOC101313156 [Fragaria vesca subsp. vesca] &gt;gi|764521119|ref|XP_011469788.1| PREDICTED: uncharacterized protein LOC101313156 [Fragaria vesca subsp. vesca] &gt;gi|764521124|ref|XP_011469792.1| PREDICTED: uncharacterized protein LOC101313156 [Fragaria vesca subsp. …	Coil; disorder_prediction; FAMILY NOT NAMED; FvH4_1g25670.t1_v4.0.a2	NA	NA
IR_718	5.07673	0.00140494	Fvb1:17511728-17512178	Fvb1	17506389	17511009	FvH4_1g25660	+	719	Downstream TTS	0.14375	0.865087	AT1G29900.1 | carbamoyl phosphate synthetase B | Chr1:10468164-10471976 FORWARD LENGTH=1187 | 201606; PREDICTED: carbamoyl-phosphate synthase large chain, chloroplastic [Fragaria vesca subsp. vesca]; sp|Q42601|CARB_ARATH Carbamoyl-phosphate synthase large chain, chloroplastic OS=Arabidopsis thaliana OX=3702 GN=CARB PE=1 SV=1; tr|A0A2P6RT81|A0A2P6RT81_ROSCH Putative carbamoyl-phosphate synthase (G…	Alanine, aspartate and glutamate metabolism; ATP binding; ATP-grasp; ATP_GRASP; CAD PROTEIN; Carbamoyl phosphate synthetase, large subunit connection domain; CarbamoylP_synth_lsu; CarbamoylP_synth_lsu_oligo; CarbamoylP_synth_lsu_oligo_sf; CARBAMOYLTRANSFERASE FAMILY MEMBER; CbamoylP_synth_lsu_CPSase_dom; CbamoylP_synth_lsu-like_ATP-bd; CPSASE; CPSASE_1; CPSASE_2; CPSase_L_chain_A; CPSase_L_chain_…	ATP binding; metal ion binding; obsolete nitrogen compound metabolic process	GO:0005524; GO:0006807; GO:0046872
IR_1643	5.09304	0.007015	Fvb2:12247750-12248029	Fvb2	12238779	12246567	FvH4_2g13940	+	1183	Downstream TTS	0.0615431	0.944684	AT1G76810.1 | eukaryotic translation initiation factor 2 (eIF-2) family protein | Chr1:28831366-28836310 REVERSE LENGTH=1294 | 201606; PREDICTED: eukaryotic translation initiation factor 5B [Fragaria vesca subsp. vesca]; sp|Q10251|IF2P_SCHPO Eukaryotic translation initiation factor 5B OS=Schizosaccharomyces pombe (strain 972 / ATCC 24843) OX=284812 GN=SPAC56F8.03 PE=1 SV=1; tr|A0A2P6PS30|A0A2P6PS…	aeIF5B_II; Coil; disorder_prediction; EFTu-like_2; ELONGATNFCT; FAMILY NOT NAMED; FvH4_2g13940.t1_v4.0.a2; FvH4_2g13940.t2_v4.0.a2; GTPase activity; GTP binding; GTP_EFTU; GTP_EFTU_D2; G_TR_2; IF-2; IF2_aeIF5B_IV; IF2_eIF5B; Initiation factor IF2/eIF5b, domain 3; P-loop containing nucleoside triphosphate hydrolases; P-loop_NTPase; ""> <signature-library-release library=; Small_GTP-bd_dom; TF_GTP-…	GTPase activity; GTP binding	GO:0003924; GO:0005525
IR_6514	5.1697	0.0380833	Fvb5:24687633-24688039	Fvb5	24680887	24687540	FvH4_5g34031	-	93	Upstream TSS	NA	NA	AT3G42170.1 | BED zinc finger and hAT dimerization domain-containing protein DAYSLEEPER | Chr3:14321838-14323928 FORWARD LENGTH=696 | 201606; sp|P08770|TRA1_MAIZE Putative AC transposase OS=Zea mays OX=4577 PE=2 SV=2; tr|A0A2P6SDU6|A0A2P6SDU6_ROSCH Putative ribonuclease H-like domain-containing protein OS=Rosa chinensis OX=74649 GN=RchiOBHm_Chr1g0341811 PE=4 SV=1; zinc finger BED domain-containin…	BED_dom; BED FINGER-RELATED; beta-beta-alpha zinc fingers; Dimer_Tnp_hAT; disorder_prediction; DNA binding; DUF4413; FvH4_5g34031.t1_v4.0.a2; HATC_C_dom; hAT-like_transposase_RNase-H; Hermes dimerisation domain; protein dimerization activity; Ribonuclease H-like; RNaseH-like_sf; zf-BED; ZF_BED; ZINC FINGER BED DOMAIN-CONTAINING PROTEIN DAYSLEEPER; Znf_BED; Znf_C2H2_sf	DNA binding; protein dimerization activity	GO:0003677; GO:0046983
IR_1134	5.18081	0.00184887	Fvb2:2253402-2253908	Fvb2	2250268	2251030	FvH4_2g02860	+	2372	Downstream TTS	-9.43069	0.0944371	AT4G33720.1 | CAP (Cysteine-rich secretory proteins%2C Antigen 5%2C and Pathogenesis-related 1 protein) superfamily protein | Chr4:16182813-16183304 FORWARD LENGTH=163 | 201606; PREDICTED: pathogenesis-related protein 1A-like [Fragaria vesca subsp. vesca]; sp|P09042|PR1C_TOBAC Pathogenesis-related protein 1C OS=Nicotiana tabacum OX=4097 PE=2 SV=3; tr|A0A2P6PJU6|A0A2P6PJU6_ROSCH Uncharacterized pr…	Allrgn_V5/Tpx1_CS; CAP; CAP (CYSTEINE-RICH SECRETORY PROTEINS, ANTIGEN 5, AND PATHOGENESIS-RELATED 1 PROTEIN) SUPERFAMILY PROTEIN; CAP_domain; CAP_sf; CRISP_1; CRISP_2; CRISP-related; CYSTEINE-RICH SECRETORY PROTEIN-RELATED; extracellular region; FvH4_2g02860.t1_v4.0.a2; PR-1-like; SCP_PR-1_like; SCP_PR1-like; V5ALLERGEN; V5_allergen-like; V5TPXLIKE	extracellular region	GO:0005576
IR_1134	5.18081	0.00184887	Fvb2:2253402-2253908	Fvb2	2254447	2258069	FvH4_2g02870	-	540	Downstream TTS	NA	NA	AT1G50110.1 | D-aminoacid aminotransferase-like PLP-dependent enzymes superfamily protein | Chr1:18558203-18560219 REVERSE LENGTH=356 | 201606; PREDICTED: branched-chain-amino-acid aminotransferase 6-like isoform X1 [Fragaria vesca subsp. vesca]; sp|Q9LPM9|BCAT6_ARATH Branched-chain-amino-acid aminotransferase 6 OS=Arabidopsis thaliana OX=3702 GN=BCAT6 PE=1 SV=1; tr|A0A2P6PJR3|A0A2P6PJR3_ROSCH Pu…	AA_TRANSFER_CLASS_4; Aminotran_4; Aminotransferase-like; Aminotrans_IV; Aminotrans_IV_CS; B_amino_transII; BCAT1; BCAT_beta_family; BCAT_family; BRANCHED-CHAIN-AMINO-ACID AMINOTRANSFERASE 7-RELATED; Branched-chain amino acid catabolism; branched-chain amino acid metabolic process; branched-chain-amino-acid transaminase activity; catalytic activity; Cysteine and methionine metabolism; D-aminoacid …	branched-chain amino acid metabolic process; branched-chain-amino-acid transaminase activity; catalytic activity	GO:0003824; GO:0004084; GO:0009081
IR_275	5.18557	6.45461e-12	Fvb1:8373567-8373881	Fvb1	8370251	8372309	FvH4_1g14930	+	1258	Downstream TTS	-2.7023	0.452593	AT3G50440.1 | methylesterase | Chr3:18717392-18718396 REVERSE LENGTH=275 | 201606; PREDICTED: probable esterase PIR7A [Fragaria vesca subsp. vesca]; sp|Q6RYA0|SABP2_TOBAC Salicylic acid-binding protein 2 OS=Nicotiana tabacum OX=4097 GN=SABP2 PE=1 SV=1; tr|A0A2P6SB71|A0A2P6SB71_ROSCH Putative 3-oxolaurate decarboxylase OS=Rosa chinensis OX=74649 GN=RchiOBHm_Chr1g0329911 PE=4 SV=1	NA	NA	NA
IR_546	5.23743	0.00017299	Fvb1:14067694-14068125	Fvb1	14064251	14065413	FvH4_1g22101	-	2281	Upstream TSS	NA	NA	tr|A0A2P6S8X2|A0A2P6S8X2_ROSCH Uncharacterized protein OS=Rosa chinensis OX=74649 GN=RchiOBHm_Chr1g0320861 PE=4 SV=1; uncharacterized protein LOC112178132 [Rosa chinensis]	NA	NA	NA
IR_546	5.23743	0.00017299	Fvb1:14067694-14068125	Fvb1	14070687	14071541	FvH4_1g22110	+	2563	Upstream TSS	0.80199	0.72698	AT4G14540.1 | nuclear factor Y%2C subunit B3 | Chr4:8344663-8345148 FORWARD LENGTH=161 | 201606; PREDICTED: nuclear transcription factor Y subunit B-3-like [Fragaria vesca subsp. vesca]; sp|O23310|NFYB3_ARATH Nuclear transcription factor Y subunit B-3 OS=Arabidopsis thaliana OX=3702 GN=NFYB3 PE=1 SV=1; tr|A0A2P6RRA0|A0A2P6RRA0_ROSCH Putative transcription factor Hap3/NF-YB family OS=Rosa chinensi…	NA	NA	NA
IR_1595	5.40671	0.00276513	Fvb2:11784048-11784347	Fvb2	11782008	11783699	FvH4_2g13500	-	349	Upstream TSS	0.0352122	0.973764	AT2G14095.1 | hypothetical protein | Chr2:5932506-5933752 REVERSE LENGTH=234 | 201606; PREDICTED: uncharacterized protein LOC101310960 [Fragaria vesca subsp. vesca]; tr|A0A2P6PGZ6|A0A2P6PGZ6_ROSCH Uncharacterized protein OS=Rosa chinensis OX=74649 GN=RchiOBHm_Chr7g0236611 PE=4 SV=1	Coil; EXPRESSED PROTEIN; FAMILY NOT NAMED; FvH4_2g13500.t1_v4.0.a2	NA	NA
IR_5927	5.52147	0.00031999	Fvb5:11857682-11858015	Fvb5	11854268	11855510	FvH4_5g20100	-	2172	Upstream TSS	NA	NA	AT2G22740.2 | SU(VAR)3-9 homolog 6 | Chr2:9664256-9666628 REVERSE LENGTH=790 | 201606; PREDICTED: YDG domain-containing protein At5g47150-like [Fragaria vesca subsp. vesca] &gt;gi|764591237|ref|XP_011465235.1| PREDICTED: YDG domain-containing protein At5g47150-like [Fragaria vesca subsp. vesca] &gt;gi|764591243|ref|XP_011465236.1| PREDICTED: YDG domain-containing protein At5g47150-like [Fragaria …	disorder_prediction; FAMILY NOT NAMED; FvH4_5g20100.t1_v4.0.a2; HISTONE-LYSINE N-METHYLTRANSFERASE, H3 LYSINE-9 SPECIFIC SUVH5-RELATED; PUA domain-like; PUA-like_sf; SAD_SRA; SRA_YDG; SRA-YDG_sf; YDG	NA	NA
IR_5608	5.58068	2.2991e-06	Fvb5:4042325-4042549	Fvb5	4038541	4039554	FvH4_5g06863	-	2771	Upstream TSS	NA	NA	AT3G05850.1 | MuDR family transposase | Chr3:1743537-1745943 REVERSE LENGTH=777 | 201606; PREDICTED: uncharacterized protein LOC105351805 [Fragaria vesca subsp. vesca]; tr|A0A2P6QD74|A0A2P6QD74_ROSCH Putative PB1 domain, transposase, MuDR, plant, Zinc finger, SWIM-type, MULE transposase OS=Rosa chinensis OX=74649 GN=RchiOBHm_Chr5g0042901 PE=4 SV=1	CAD &amp; PB1 domains; FAMILY NOT NAMED; FvH4_5g06863.t1_v4.0.a2; PB1; PB1_dom; protein binding; ""> <signature-library-release library=	protein binding	GO:0005515
IR_1437	5.60005	0.000481918	Fvb2:8880348-8880883	Fvb2	8876948	8877786	FvH4_2g10040	-	2562	Upstream TSS	-1.37023	0.0536728	AT4G34630.1 | prostatic spermine-binding-like protein | Chr4:16537093-16537692 REVERSE LENGTH=199 | 201606; hypothetical protein RchiOBHm_Chr6g0266971 [Rosa chinensis]; tr|A0A2P6PPT3|A0A2P6PPT3_ROSCH Uncharacterized protein OS=Rosa chinensis OX=74649 GN=RchiOBHm_Chr6g0266971 PE=4 SV=1	disorder_prediction; FvH4_2g10040.t1_v4.0.a2	NA	NA
IR_1437	5.60005	0.000481918	Fvb2:8880348-8880883	Fvb2	8883182	8889748	FvH4_2g10050	-	2300	Downstream TTS	-4.53678	2.28371e-43	AT2G21385.1 | hypothetical protein | Chr2:9149726-9151752 FORWARD LENGTH=330 | 201606; PREDICTED: uncharacterized protein LOC101295094 [Fragaria vesca subsp. vesca]; tr|A0A2P6PPW9|A0A2P6PPW9_ROSCH Uncharacterized protein OS=Rosa chinensis OX=74649 GN=RchiOBHm_Chr6g0266981 PE=4 SV=1	FAMILY NOT NAMED; FvH4_2g10050.t1_v4.0.a2	NA	NA
IR_2305	5.74066	2.98209e-08	Fvb2:28063567-28064264	Fvb2	28057942	28061021	FvH4_2g38920	-	2546	Upstream TSS	-4.08731	NA	AT1G75500.2 | Walls Are Thin 1 | Chr1:28338282-28340091 REVERSE LENGTH=389 | 201606; PREDICTED: protein WALLS ARE THIN 1 [Fragaria vesca subsp. vesca]; sp|Q94AP3|WAT1_ARATH Protein WALLS ARE THIN 1 OS=Arabidopsis thaliana OX=3702 GN=WAT1 PE=1 SV=1; tr|A0A2P6PYW5|A0A2P6PYW5_ROSCH WAT1-related protein OS=Rosa chinensis OX=74649 GN=RchiOBHm_Chr6g0302011 PE=3 SV=1	disorder_prediction; EamA; EamA_dom; FAMILY NOT NAMED; FvH4_2g38920.t1_v4.0.a2; integral component of membrane; membrane; Multidrug resistance efflux transporter EmrE; ""> <signature-library-release library=; transmembrane transporter activity; WAT1-related	integral to membrane; membrane; transmembrane transporter activity	GO:0016020; GO:0016021; GO:0022857
IR_4958	5.76365	0.0413954	Fvb4:21438279-21438603	Fvb4	21441226	21441535	FvH4_4g17490	+	2624	Upstream TSS	-9.45671	0.0896973	AT5G18600.1 | Thioredoxin superfamily protein | Chr5:6183466-6183774 REVERSE LENGTH=102 | 201606; PREDICTED: monothiol glutaredoxin-S2 [Fragaria vesca subsp. vesca]; sp|Q8L8Z8|GRXS2_ARATH Monothiol glutaredoxin-S2 OS=Arabidopsis thaliana OX=3702 GN=GRXS2 PE=3 SV=1; tr|A0A2P6QY55|A0A2P6QY55_ROSCH Putative oxidoreductase OS=Rosa chinensis OX=74649 GN=RchiOBHm_Chr4g0421391 PE=4 SV=1	cell redox homeostasis; electron transfer activity; FvH4_4g17490.t1_v4.0.a2; GlrX-like_pln_2; Glutaredoxin; GLUTAREDOXIN; GLUTAREDOXIN_2; Glutaredoxin_subgr; GRX_GRXh_1_2_like; MONOTHIOL GLUTAREDOXIN-S2; protein disulfide oxidoreductase activity; Thioredoxin-like; Thioredoxin-like_sf; TIGR02189	cell redox homeostasis; electron transfer activity; protein-disulfide reductase activity	GO:0009055; GO:0015035; GO:0045454
IR_3680	5.78532	0.00311779	Fvb3:29726147-29726446	Fvb3	29724313	29724544	FvH4_3g34240	+	1603	Downstream TTS	NA	NA	AT2G01710.1 | Chaperone DnaJ-domain superfamily protein | Chr2:315836-316771 FORWARD LENGTH=311 | 201606; PREDICTED: uncharacterized protein LOC101294174 [Fragaria vesca subsp. vesca]; sp|Q9UXR9|DNAJ_METTE Chaperone protein DnaJ OS=Methanosarcina thermophila OX=2210 GN=dnaJ PE=3 SV=1; tr|A6XN08|A6XN08_PRUPE Uncharacterized protein OS=Prunus persica OX=3760 GN=PRUPE_1G531000 PE=4 SV=1	CHAPERONE DNAJ-DOMAIN SUPERFAMILY PROTEIN; Chaperone J-domain; DnaJ; DNAJ_2; DnaJ_domain; FAMILY NOT NAMED; FvH4_3g34240.t1_v4.0.a2; JDOMAIN; J_dom_sf	NA	NA
IR_2173	5.84298	0.0327446	Fvb2:23577400-23577526	Fvb2	23579598	23588572	FvH4_2g30421	-	2073	Downstream TTS	NA	NA	AT2G25730.4 | zinc finger FYVE domain protein | Chr2:10956751-10972729 REVERSE LENGTH=2473 | 201606; PREDICTED: uncharacterized protein LOC101291736 isoform X2 [Fragaria vesca subsp. vesca]; tr|A0A2P6Q1P8|A0A2P6Q1P8_ROSCH Uncharacterized protein OS=Rosa chinensis OX=74649 GN=RchiOBHm_Chr6g0312581 PE=4 SV=1	Coil; disorder_prediction; FAMILY NOT NAMED; FvH4_2g30421.t1_v4.0.a2; ""> <signature-library-release library=	NA	NA
IR_4636	5.84869	3.56266e-06	Fvb4:14490912-14491484	Fvb4	14486622	14488534	FvH4_4g10782	+	2378	Downstream TTS	NA	NA	AT2G34320.1 | Polynucleotidyl transferase%2C ribonuclease H-like superfamily protein | Chr2:14484959-14485837 FORWARD LENGTH=292 | 201606; tr|A0A2P6QCF0|A0A2P6QCF0_ROSCH Putative ribonuclease H-like domain-containing protein OS=Rosa chinensis OX=74649 GN=RchiOBHm_Chr5g0040041 PE=4 SV=1; uncharacterized protein LOC112177537 [Rosa chinensis]	FAMILY NOT NAMED; FvH4_4g10782.t1_v4.0.a2; nucleic acid binding; POLYNUCLEOTIDYL TRANSFERASE, RIBONUCLEASE H-LIKE SUPERFAMILY PROTEIN; Ribonuclease H-like; RNA-DNA hybrid ribonuclease activity; RNaseH_domain; RNase_H_like; RNaseH-like_sf; RNaseH_sf; RVT_3	nucleic acid binding; RNA-DNA hybrid ribonuclease activity	GO:0003676; GO:0004523
IR_3391	5.88527	0.0387993	Fvb3:22665945-22666404	Fvb3	22655533	22664479	FvH4_3g29650	-	1466	Upstream TSS	-0.650712	0.117087	AT2G27760.1 | tRNAisopentenyltransferase 2 | Chr2:11824860-11827432 FORWARD LENGTH=466 | 201606; PREDICTED: tRNA dimethylallyltransferase 2 isoform X1 [Fragaria vesca subsp. vesca]; sp|Q9ZUX7|IPT2_ARATH tRNA dimethylallyltransferase 2 OS=Arabidopsis thaliana OX=3702 GN=IPT2 PE=1 SV=2; tr|A0A2P6QGA3|A0A2P6QGA3_ROSCH Putative transferase OS=Rosa chinensis OX=74649 GN=RchiOBHm_Chr5g0055011 PE=3 SV=1	Cis-zeatin biosynthesis; Dimethylallyltransferase; disorder_prediction; FvH4_3g29650.t1_v4.0.a2; IPPT; IPP_trans; IPT; P-loop containing nucleoside triphosphate hydrolases; P-loop_NTPase; TIGR00174; TRNA DIMETHYLALLYLTRANSFERASE; TRNA DIMETHYLALLYLTRANSFERASE 2; tRNA modification in the mitochondrion; tRNA modification in the nucleus and cytosol; tRNA processing; Zeatin biosynthesis	tRNA processing	GO:0008033
IR_1646	5.92152	4.10725e-05	Fvb2:12249275-12249645	Fvb2	12251439	12254650	FvH4_2g13941	-	1795	Downstream TTS	NA	NA	AT2G19360.1 | tRNA-splicing ligase%2C putative (DUF239) | Chr2:8378664-8383374 FORWARD LENGTH=426 | 201606; PREDICTED: uncharacterized protein LOC101314724 [Fragaria vesca subsp. vesca]; tr|A0A1R3FYY0|A0A1R3FYY0_9ROSI Uncharacterized protein OS=Corchorus olitorius OX=93759 GN=COLO4_37839 PE=4 SV=1	NA	NA	NA
IR_1566	6.20182	0.00635721	Fvb2:11299245-11299639	Fvb2	11302379	11303993	FvH4_2g12860	+	2741	Upstream TSS	-0.134598	0.83	AT1G71750.1 | Hypoxanthine-guanine phosphoribosyltransferase | Chr1:26987954-26989144 REVERSE LENGTH=188 | 201606; PREDICTED: hypoxanthine-guanine phosphoribosyltransferase [Fragaria vesca subsp. vesca]; sp|Q839B2|HPRT_ENTFA Hypoxanthine-guanine phosphoribosyltransferase OS=Enterococcus faecalis (strain ATCC 700802 / V583) OX=226185 GN=hpt PE=3 SV=1; tr|A0A2P6PRM5|A0A2P6PRM5_ROSCH Hypoxanthine ph…	Adenine and adenosine salvage III; Adenine salvage; Drug metabolism - other enzymes; FAMILY NOT NAMED; FvH4_2g12860.t1_v4.0.a2; Guanine and guanosine salvage; Guanine and guanosine salvage II; Hxn_phspho_trans; HYPOXANTHINE PHOSPHORIBOSYLTRANSFERASE; hypoxanthine phosphoribosyltransferase activity; nucleoside metabolic process; Pribosyltran; PRibTrfase_dom; PRTase-like; PRTases_typeI; Purine meta…	hypoxanthine phosphoribosyltransferase activity; nucleoside metabolic process; purine ribonucleoside salvage	GO:0004422; GO:0006166; GO:0009116
IR_5495	6.71218	0.0143215	Fvb5:1014746-1015183	Fvb5	1016712	1019692	FvH4_5g01600	+	1530	Upstream TSS	-2.12955	3.12851e-06	AT1G12740.1 | cytochrome P450%2C family 87%2C subfamily A%2C polypeptide 2 | Chr1:4342462-4344569 FORWARD LENGTH=472 | 201606; PREDICTED: cytochrome P450 87A3-like isoform X1 [Fragaria vesca subsp. vesca]; sp|Q7XU38|C87A3_ORYSJ Cytochrome P450 87A3 OS=Oryza sativa subsp. japonica OX=39947 GN=CYP87A3 PE=2 SV=3; tr|A0A251P5V1|A0A251P5V1_PRUPE Uncharacterized protein OS=Prunus persica OX=3760 GN=PRU…	Cytochrome P450; CYTOCHROME_P450; CYTOCHROME P450, FAMILY 87, SUBFAMILY A, POLYPEPTIDE 2; Cyt_P450; Cyt_P450_CS; Cyt_P450_E_grp-I; Cyt_P450_sf; EP450I; FAMILY NOT NAMED; FvH4_5g01600.t1_v4.0.a2; heme binding; iron ion binding; oxidation-reduction process; oxidoreductase activity, acting on paired donors, with incorporation or reduction of molecular oxygen; p450; P450	heme binding; iron ion binding; obsolete oxidation-reduction process; oxidoreductase activity, acting on paired donors, with incorporation or reduction of molecular oxygen	GO:0005506; GO:0016705; GO:0020037; GO:0055114
IR_5241	6.7557	0.00625559	Fvb4:27435481-27435885	Fvb4	27437458	27446024	FvH4_4g25760	+	1574	Upstream TSS	-3.42933	1.01668e-08	AT1G72770.4 | HYPERSENSITIVE TO ABA1 | Chr1:27390998-27392851 FORWARD LENGTH=511 | 201606; PREDICTED: uncharacterized protein LOC101301302 isoform X1 [Fragaria vesca subsp. vesca]; sp|Q9CAJ0|P2C16_ARATH Protein phosphatase 2C 16 OS=Arabidopsis thaliana OX=3702 GN=HAB1 PE=1 SV=1; tr|A0A2P6R150|A0A2P6R150_ROSCH Putative leucine-rich repeat domain, L domain-containing protein OS=Rosa chinensis OX=74…	Adenine nucleotide alpha hydrolases-like; catalytic activity; cation binding; Coil; disorder_prediction; FvH4_4g25760.t1_v4.0.a2; L domain-like; LRR_dom_sf; PP2C; PP2C_BS; PP2Cc; PP2C-like; PPM_1; PPM_2; PPM-type_dom_sf; PPM-type_phosphatase_dom; protein dephosphorylation; PROTEIN PHOSPHATASE 2C; PROTEIN PHOSPHATASE 2C 16; protein serine/threonine phosphatase activity; Rossmann-like_a/b/a_fold; S…	catalytic activity; cation binding; protein dephosphorylation; protein serine/threonine phosphatase activity	GO:0003824; GO:0004722; GO:0006470; GO:0043169
IR_5241	6.7557	0.00625559	Fvb4:27435481-27435885	Fvb4	27431098	27432767	FvH4_4g25740	+	2714	Downstream TTS	3.79383	1.51118e-26	AT4G12690.2 | DUF868 family protein (DUF868) | Chr4:7480896-7481753 FORWARD LENGTH=285 | 201606; PREDICTED: uncharacterized protein LOC105351839 [Fragaria vesca subsp. vesca]; tr|A0A2P6R161|A0A2P6R161_ROSCH Uncharacterized protein OS=Rosa chinensis OX=74649 GN=RchiOBHm_Chr4g0433181 PE=4 SV=1	disorder_prediction; DUF868; DUF868_pln; FAMILY NOT NAMED; FvH4_4g25740.t1_v4.0.a2; ""> <signature-library-release library=	NA	NA
IR_2168	6.88794	3.00661e-08	Fvb2:23492462-23492989	Fvb2	23493284	23493765	FvH4_2g30341	+	296	Upstream TSS	NA	NA	NA	FvH4_2g30341.t1_v4.0.a2	NA	NA
IR_2168	6.88794	3.00661e-08	Fvb2:23492462-23492989	Fvb2	23494279	23496760	FvH4_2g30342	+	1291	Upstream TSS	NA	NA	NA	NA	NA	NA
IR_2168	6.88794	3.00661e-08	Fvb2:23492462-23492989	Fvb2	23490015	23491596	FvH4_2g30340	+	866	Downstream TTS	NA	NA	PREDICTED: uncharacterized protein LOC105352280 [Fragaria vesca subsp. vesca]	FvH4_2g30340.t1_v4.0.a2	NA	NA
IR_8747	7.30527	5.77907e-13	Fvb7:4397507-4397957	Fvb7	4398984	4399398	FvH4_7g03860	+	1028	Upstream TSS	NA	NA	NA	NA	NA	NA
IR_7085	7.43202	0.0413903	Fvb6:9018229-9018477	Fvb6	9021144	9023349	FvH4_6g14650	+	2668	Upstream TSS	3.8014	1.91807e-06	AT3G09520.1 | exocyst subunit exo70 family protein H4 | Chr3:2923743-2925629 FORWARD LENGTH=628 | 201606; PREDICTED: exocyst complex component EXO70A1-like [Fragaria vesca subsp. vesca]; sp|Q8VY27|E70H1_ARATH Exocyst complex component EXO70H1 OS=Arabidopsis thaliana OX=3702 GN=EXO70H1 PE=1 SV=1; tr|A0A2P6RAD4|A0A2P6RAD4_ROSCH Exocyst subunit Exo70 family protein OS=Rosa chinensis OX=74649 GN=Rchi…	Cullin repeat-like; Cullin_repeat-like_dom_sf; disorder_prediction; Exo70; exocyst; EXOCYST COMPLEX PROTEIN EXO70; EXOCYST SUBUNIT EXO70 FAMILY PROTEIN H4; exocytosis; FvH4_6g14650.t1_v4.0.a2; Insulin processing; Translocation of SLC2A4 (GLUT4) to the plasma membrane; VxPx cargo-targeting to cilium	exocyst; exocytosis	GO:0000145; GO:0006887
IR_6886	7.76213	0.0298903	Fvb6:4769263-4769684	Fvb6	4771036	4774233	FvH4_6g08000	+	1353	Upstream TSS	1.59688	0.0270465	AT4G18910.1 | NOD26-like intrinsic protein 1%3B2 | Chr4:10366211-10368179 FORWARD LENGTH=294 | 201606; PREDICTED: aquaporin NIP1-1-like [Fragaria vesca subsp. vesca] &gt;gi|764597635|ref|XP_011466195.1| PREDICTED: aquaporin NIP1-1-like [Fragaria vesca subsp. vesca]; sp|Q8LFP7|NIP12_ARATH Aquaporin NIP1-2 OS=Arabidopsis thaliana OX=3702 GN=NIP1-2 PE=2 SV=2; tr|E7BLL1|E7BLL1_9ROSA Nodulin 26-like i…	Aquaporin-like; Aquaporin_transptr; channel activity; disorder_prediction; FAMILY NOT NAMED; FvH4_6g08000.t1_v4.0.a2; membrane; MINTRINSICP; MIP; MIP_CS; Passive transport by Aquaporins; ""> <signature-library-release library=; TIGR00861; transmembrane transport	channel activity; membrane; transmembrane transport	GO:0015267; GO:0016020; GO:0055085
IR_7537	7.84877	0.0266252	Fvb6:18276177-18276611	Fvb6	18274723	18275141	FvH4_6g24240	+	1036	Downstream TTS	NA	NA	NA	FvH4_6g24240.t1_v4.0.a2	NA	NA
IR_7754	7.91294	0.0165167	Fvb6:21662450-21663151	Fvb6	21656941	21659479	FvH4_6g28113	-	2971	Upstream TSS	NA	NA	PREDICTED: uncharacterized protein LOC105352232 [Fragaria vesca subsp. vesca]; tr|M5VQY4|M5VQY4_PRUPE Uncharacterized protein OS=Prunus persica OX=3760 GN=PRUPE_ppa018564mg PE=4 SV=1	disorder_prediction; FAMILY NOT NAMED; FvH4_6g28113.t1_v4.0.a2; ""> <signature-library-release library=	NA	NA
IR_7754	7.91294	0.0165167	Fvb6:21662450-21663151	Fvb6	21665144	21666441	FvH4_6g28140	+	1994	Upstream TSS	10.3392	9.67526e-11	AT5G22250.1 | Polynucleotidyl transferase%2C ribonuclease H-like superfamily protein | Chr5:7365605-7366441 REVERSE LENGTH=278 | 201606; PREDICTED: probable CCR4-associated factor 1 homolog 11 [Fragaria vesca subsp. vesca]; sp|Q9FMS6|CAF1K_ARATH Probable CCR4-associated factor 1 homolog 11 OS=Arabidopsis thaliana OX=3702 GN=CAF1-11 PE=2 SV=1; tr|A0A2P6RV85|A0A2P6RV85_ROSCH Putative poly(A)-specif…	CAF1; CCR4-ASSOCIATED FACTOR 1 HOMOLOG 9-RELATED; CCR4-NOT complex; CCR4-NOT TRANSCRIPTION COMPLEX SUBUNIT; CNOT7/CNOT8/Pop2; Deadenylation of mRNA; FvH4_6g28140.t1_v4.0.a2; nucleic acid binding; poly(A)-specific ribonuclease activity; Ribonuclease H-like; RNase_CAF1; RNaseH-like_sf; RNaseH_sf; TP53 regulates transcription of additional cell cycle genes whose exact role in the p53 pathway remain …	CCR4-NOT complex; nucleic acid binding; poly(A)-specific ribonuclease activity	GO:0003676; GO:0004535; GO:0030014
IR_7754	7.91294	0.0165167	Fvb6:21662450-21663151	Fvb6	21661502	21661883	FvH4_6g28114	+	567	Downstream TTS	NA	NA	tr|A0A2P6QX62|A0A2P6QX62_ROSCH Putative ribonuclease H-like domain, reverse transcriptase zinc-binding domain-containing protein OS=Rosa chinensis OX=74649 GN=RchiOBHm_Chr4g0417671 PE=4 SV=1; uncharacterized protein LOC112197206 [Rosa chinensis]	FvH4_6g28114.t1_v4.0.a2; nucleic acid binding; RNA-DNA hybrid ribonuclease activity; RNaseH_domain; RNaseH_sf; RVT_3	nucleic acid binding; RNA-DNA hybrid ribonuclease activity	GO:0003676; GO:0004523
IR_6882	8.04158	0.0176033	Fvb6:4743094-4743300	Fvb6	4738846	4742932	FvH4_6g07960	+	162	Downstream TTS	NA	NA	AT1G11340.1 | G-type lectin S-receptor-like Serine/Threonine-kinase | Chr1:3814116-3817216 REVERSE LENGTH=833 | 201606; G-type lectin S-receptor-like serine/threonine-protein kinase At1g11410 isoform X1 [Rosa chinensis]; sp|Q9ZT07|RKS1_ARATH G-type lectin S-receptor-like serine/threonine-protein kinase RKS1 OS=Arabidopsis thaliana OX=3702 GN=RKS1 PE=3 SV=3; tr|A0A2P6Q341|A0A2P6Q341_ROSCH Uncharac…	alpha-D-mannose-specific plant lectins; ATP binding; B_lectin; BULB_LECTIN; Bulb-type_lectin_dom; Bulb-type_lectin_dom_sf; FAMILY NOT NAMED; FvH4_6g07960.t1_v4.0.a2; Human cytomegalovirus infection; Human immunodeficiency virus 1 infection; Human papillomavirus infection; Kinase-like_dom_sf; mTOR signaling pathway; PAN; PAN_2; Pan_app; PAN_AP_plant; PI3K-Akt signaling pathway; Pkinase_Tyr; protei…	ATP binding; protein kinase activity; protein phosphorylation; protein serine/threonine kinase activity; recognition of pollen	GO:0004672; GO:0004674; GO:0005524; GO:0006468; GO:0048544
IR_9437	8.05007	0.0345929	Fvb7:23747368-23747889	Fvb7	23749411	23752039	FvH4_7g33360	+	1523	Upstream TSS	3.15836	0.0173171	AT5G24680.1 | Peptidase C78%2C ubiquitin fold modifier-specific peptidase 1/ 2 | Chr5:8453666-8455358 FORWARD LENGTH=399 | 201606; PREDICTED: LOW QUALITY PROTEIN: zinc finger with UFM1-specific peptidase domain protein [Fragaria vesca subsp. vesca]; sp|Q5U2S3|ZUP1_RAT Zinc finger-containing ubiquitin peptidase 1 OS=Rattus norvegicus OX=10116 GN=Zup1 PE=2 SV=1; tr|A0A2P6SPL6|A0A2P6SPL6_ROSCH Putat…	NA	NA	NA
IR_9437	8.05007	0.0345929	Fvb7:23747368-23747889	Fvb7	23749505	23750331	FvH4_7g33361	+	1617	Upstream TSS	NA	NA	PREDICTED: LOW QUALITY PROTEIN: zinc finger with UFM1-specific peptidase domain protein [Fragaria vesca subsp. vesca]; tr|A0A2P6SPL6|A0A2P6SPL6_ROSCH Putative peptidase C78, ubiquitin modifier-specific peptidase 1/ 2 OS=Rosa chinensis OX=74649 GN=RchiOBHm_Chr1g0383341 PE=4 SV=1	NA	NA	NA
IR_2088	8.11452	0.0215746	Fvb2:21659491-21659792	Fvb2	21656541	21656978	FvH4_2g27220	-	2513	Upstream TSS	NA	NA	uncharacterized protein LOC112178113 [Rosa chinensis]	FvH4_2g27220.t1_v4.0.a2; nucleic acid binding; RNA-DNA hybrid ribonuclease activity; RNaseH_domain; RNase_H_like; RNaseH_sf; RVT_3	nucleic acid binding; RNA-DNA hybrid ribonuclease activity	GO:0003676; GO:0004523
IR_355	8.12139	0.0268228	Fvb1:10698278-10698716	Fvb1	10694311	10695478	FvH4_1g18383	+	2800	Downstream TTS	NA	NA	AT4G23160.3 | cysteine-rich RECEPTOR-like kinase | Chr4:12129485-12133157 FORWARD LENGTH=1043 | 201606; putative RNA-directed DNA polymerase [Rosa chinensis]; sp|Q94HW2|POLR1_ARATH Retrovirus-related Pol polyprotein from transposon RE1 OS=Arabidopsis thaliana OX=3702 GN=RE1 PE=2 SV=1; tr|A0A2P6S100|A0A2P6S100_ROSCH Putative RNA-directed DNA polymerase OS=Rosa chinensis OX=74649 GN=RchiOBHm_Chr2g0…	Coil; DNA/RNA polymerases; FvH4_1g18383.t1_v4.0.a2; GAG-POL-RELATED RETROTRANSPOSON; retrotransposon nucleocapsid; Retrotran_Ty1/copia-like; RVT_2; ""> <signature-library-release library=	retrotransposon nucleocapsid	GO:0000943
IR_4731	8.18991	0.0131763	Fvb4:16936631-16937328	Fvb4	16939802	16948800	FvH4_4g13340	+	2475	Upstream TSS	-0.0568728	0.941413	AT5G48610.5 | myb-like protein X | Chr5:19712614-19715543 FORWARD LENGTH=484 | 201606; PREDICTED: glutamic acid-rich protein-like [Fragaria vesca subsp. vesca] &gt;gi|764573024|ref|XP_011462820.1| PREDICTED: glutamic acid-rich protein-like [Fragaria vesca subsp. vesca]; tr|A0A2P6QWA7|A0A2P6QWA7_ROSCH Uncharacterized protein OS=Rosa chinensis OX=74649 GN=RchiOBHm_Chr4g0413691 PE=4 SV=1	Coil; disorder_prediction; FAMILY NOT NAMED; FvH4_4g13340.t1_v4.0.a2; FvH4_4g13340.t2_v4.0.a2; MYB-LIKE PROTEIN X	NA	NA
IR_6885	8.31084	0.0110937	Fvb6:4768901-4769262	Fvb6	4765710	4767967	FvH4_6g07990	-	934	Upstream TSS	NA	NA	AT4G18910.1 | NOD26-like intrinsic protein 1%3B2 | Chr4:10366211-10368179 FORWARD LENGTH=294 | 201606; PREDICTED: nodulin-26-like [Fragaria vesca subsp. vesca]; sp|Q8LFP7|NIP12_ARATH Aquaporin NIP1-2 OS=Arabidopsis thaliana OX=3702 GN=NIP1-2 PE=2 SV=2; tr|A0A0H3UY47|A0A0H3UY47_FRAAN Aquaporin NOD26-like protein OS=Fragaria ananassa OX=3747 GN=NIP1:1 PE=2 SV=1	Aquaporin-like; Aquaporin_transptr; channel activity; FAMILY NOT NAMED; FvH4_6g07990.t1_v4.0.a2; membrane; MINTRINSICP; MIP; MIP_CS; Passive transport by Aquaporins; ""> <signature-library-release library=; TIGR00861; transmembrane transport	channel activity; membrane; transmembrane transport	GO:0015267; GO:0016020; GO:0055085
IR_4656	8.38861	0.000186441	Fvb4:14946216-14946485	Fvb4	14937537	14944472	FvH4_4g11140	-	1744	Upstream TSS	0	1	AT2G31500.1 | calcium-dependent protein kinase 24 | Chr2:13414016-13416324 FORWARD LENGTH=582 | 201606; PREDICTED: calcium-dependent protein kinase 24 [Fragaria vesca subsp. vesca]; sp|Q9SIQ7|CDPKO_ARATH Calcium-dependent protein kinase 24 OS=Arabidopsis thaliana OX=3702 GN=CPK24 PE=2 SV=1; tr|A0A2P6QUK8|A0A2P6QUK8_ROSCH Uncharacterized protein OS=Rosa chinensis OX=74649 GN=RchiOBHm_Chr4g0407071 …	ATP binding; CALCIUM-DEPENDENT PROTEIN KINASE 24; calcium ion binding; EF-hand; EF_HAND_1; EF_Hand_1_Ca_BS; EF_HAND_2; EF-hand_7; EF-hand_8; EF_hand_dom; EF-hand-dom_pair; FvH4_4g11140.t1_v4.0.a2; Kinase-like_dom_sf; Pkinase; protein kinase activity; PROTEIN_KINASE_ATP; Protein_kinase_ATP_BS; PROTEIN_KINASE_DOM; Protein kinase-like (PK-like); PROTEIN_KINASE_ST; protein phosphorylation; Prot_kinas…	ATP binding; calcium ion binding; protein kinase activity; protein phosphorylation	GO:0004672; GO:0005509; GO:0005524; GO:0006468
IR_3916	8.57637	0.0371648	Fvb3:34204804-34205216	Fvb3	34202370	34203356	FvH4_3g40551	+	1448	Downstream TTS	NA	NA	protein DOWN-REGULATED IN DIF1 11-like [Rosa chinensis]; tr|A0A2P6RVI4|A0A2P6RVI4_ROSCH Putative Prolamin-like domain-containing protein OS=Rosa chinensis OX=74649 GN=RchiOBHm_Chr2g0133141 PE=4 SV=1	DD11; disorder_prediction; FAMILY NOT NAMED; FvH4_3g40551.t1_v4.0.a2; Prolamin-like; Prolamin_like	NA	NA
IR_8512	8.93203	0.00278726	Fvb6:38260057-38260563	Fvb6	38254705	38257372	FvH4_6g51620	-	2685	Upstream TSS	0.51689	0.674664	AT3G01580.1 | Tetratricopeptide repeat (TPR)-like superfamily protein | Chr3:223529-225511 REVERSE LENGTH=660 | 201606; putative pentatricopeptide repeat-containing protein At3g01580 [Rosa chinensis]; sp|Q9SS97|PP205_ARATH Putative pentatricopeptide repeat-containing protein At3g01580 OS=Arabidopsis thaliana OX=3702 GN=PCMP-E87 PE=3 SV=2; tr|A0A314Z3A4|A0A314Z3A4_PRUYE Putative pentatricopeptide …	NA	NA	NA
IR_8512	8.93203	0.00278726	Fvb6:38260057-38260563	Fvb6	38260749	38263595	FvH4_6g51650	+	187	Upstream TSS	-0.239456	0.707874	AT5G50180.1 | Protein kinase superfamily protein | Chr5:20431116-20432883 FORWARD LENGTH=346 | 201606; PREDICTED: serine/threonine-protein kinase HT1-like [Fragaria vesca subsp. vesca]; sp|Q9ZQ31|STY13_ARATH Serine/threonine-protein kinase STY13 OS=Arabidopsis thaliana OX=3702 GN=STY13 PE=1 SV=2; tr|A0A2P6S5T6|A0A2P6S5T6_ROSCH Putative dual-specificity kinase TKL-Pl-4 family OS=Rosa chinensis OX=…	NA	NA	NA
IR_2594	9.44225	0.000768331	Fvb3:7172225-7172634	Fvb3	7172985	7175273	FvH4_3g12100	+	352	Upstream TSS	-3.70105	0.0723502	AT1G01340.2 | cyclic nucleotide gated channel 10 | Chr1:132414-135216 REVERSE LENGTH=711 | 201606; PREDICTED: probable cyclic nucleotide-gated ion channel 3 [Fragaria vesca subsp. vesca]; sp|Q9LNJ0|CNG10_ARATH Probable cyclic nucleotide-gated ion channel 10 OS=Arabidopsis thaliana OX=3702 GN=CNGC10 PE=2 SV=2; tr|A0A2P6SDL6|A0A2P6SDL6_ROSCH Putative potassium channel, voltage-dependent, ERG OS=Ros…	cAMP-binding domain-like; CAP_ED; cNMP-bd_dom; cNMP-bd-like; CNMP_BINDING_3; CYCLIC NUCLEOTIDE-GATED ION CHANNEL 1; FAMILY NOT NAMED; FvH4_3g12100.t1_v4.0.a2; RmlC-like_jellyroll	NA	NA

## Sheet: IRs & Genes - Ripe vs Immature
IR_ID	log2FoldChange	padj	Coords	Gene_Chr	Gene_Start	Gene_End	Gene_ID	Gene_Strand	Distance_IR_from_Gene	Location_IR_from_Gene	log2FC_gene_RedvsWhite	padj_gene_RedvsWhite	BLAST	InterPro	GO Term	GO Accession
IR_5059	-7.51653	0.0199324	Fvb4:23378341-23378766	Fvb4	23373721	23376237	FvH4_4g19880	+	2104	Downstream TTS	-0.341234	0.450772	AT4G16210.1 | enoyl-CoA hydratase/isomerase A | Chr4:9176864-9177978 REVERSE LENGTH=265 | 201606; PREDICTED: probable enoyl-CoA hydratase, mitochondrial [Fragaria vesca subsp. vesca]; sp|Q6NL24|ECH1P_ARATH Probable enoyl-CoA hydratase 1, peroxisomal OS=Arabidopsis thaliana OX=3702 GN=ECHIA PE=1 SV=1; tr|A0A2P6QZ44|A0A2P6QZ44_ROSCH Putative short-chain-enoyl-CoA hydratase OS=Rosa chinensis OX=7464…	catalytic activity; ClpP/crotonase; ClpP/crotonase-like_dom_sf; crotonase-like; ECH_1; Enoyl-CoA_hydra/iso; FAMILY NOT NAMED; FvH4_4g19880.t1_v4.0.a2	catalytic activity	GO:0003824
IR_5059	-7.51653	0.0199324	Fvb4:23378341-23378766	Fvb4	23377668	23378141	FvH4_4g19881	+	200	Downstream TTS	NA	NA	NA	FvH4_4g19881.t1_v4.0.a2	NA	NA
IR_5059	-7.51653	0.0199324	Fvb4:23378341-23378766	Fvb4	23379391	23380096	FvH4_4g19882	-	626	Downstream TTS	NA	NA	PREDICTED: glutathione S-transferase T3-like [Fragaria vesca subsp. vesca]; tr|A0A2P6PBN0|A0A2P6PBN0_ROSCH Putative No apical meristem-associated domain-containing protein OS=Rosa chinensis OX=74649 GN=RchiOBHm_Chr7g0215961 PE=4 SV=1	Coil; FAMILY NOT NAMED; FvH4_4g19882.t1_v4.0.a2; NAM-associated; NAM-associated_C; ""> <signature-library-release library=	NA	NA
IR_6769	-6.64707	0.0242773	Fvb6:1380751-1381177	Fvb6	1376685	1378759	FvH4_6g02390	-	1992	Upstream TSS	NA	NA	AT1G66170.1 | RING/FYVE/PHD zinc finger superfamily protein | Chr1:24638793-24641222 REVERSE LENGTH=704 | 201606; PREDICTED: PHD finger protein MALE MEIOCYTE DEATH 1-like [Fragaria vesca subsp. vesca]; sp|Q7X6Y7|MMD1_ARATH PHD finger protein MALE MEIOCYTE DEATH 1 OS=Arabidopsis thaliana OX=3702 GN=MMD1 PE=2 SV=1; tr|A0A2P6R5P6|A0A2P6R5P6_ROSCH Uncharacterized protein OS=Rosa chinensis OX=74649 GN…	disorder_prediction; FAMILY NOT NAMED; FvH4_6g02390.t1_v4.0.a2; ""> <signature-library-release library=	NA	NA
IR_6769	-6.64707	0.0242773	Fvb6:1380751-1381177	Fvb6	1381471	1382416	FvH4_6g02391	-	295	Downstream TTS	NA	NA	AT4G22390.2 | F-box associated ubiquitination effector family protein | Chr4:11813757-11815074 REVERSE LENGTH=401 | 201606; PREDICTED: F-box/kelch-repeat protein At3g23880-like [Fragaria vesca subsp. vesca]; sp|Q9SUY0|FB244_ARATH F-box protein At4g22390 OS=Arabidopsis thaliana OX=3702 GN=At4g22390 PE=2 SV=3; tr|A0A314XMI0|A0A314XMI0_PRUYE F-box/kelch-repeat protein OS=Prunus yedoensis var. nudifl…	FAMILY NOT NAMED; FBA_3; F-box-assoc_dom_typ3; F-box-assoc_interact_dom; FvH4_6g02391.t1_v4.0.a2; ""> <signature-library-release library=; TIGR01640	NA	NA
IR_6019	-5.7094	0.0135163	Fvb5:13918886-13919318	Fvb5	13911207	13916446	FvH4_5g22580	+	2440	Downstream TTS	1.04137	0.000412207	AT1G32340.1 | NDR1/HIN1-like 8 | Chr1:11663462-11666037 REVERSE LENGTH=688 | 201606; PREDICTED: E3 ubiquitin-protein ligase RNF14 [Fragaria vesca subsp. vesca]; sp|Q9JI90|RNF14_MOUSE E3 ubiquitin-protein ligase RNF14 OS=Mus musculus OX=10090 GN=Rnf14 PE=1 SV=2; tr|A0A2P6PA81|A0A2P6PA81_ROSCH RBR-type E3 ubiquitin transferase OS=Rosa chinensis OX=74649 GN=RchiOBHm_Chr7g0210351 PE=3 SV=1	disorder_prediction; E3_UB_ligase_RBR; FvH4_5g22580.t1_v4.0.a2; IBR; IBR_dom; protein binding; protein ubiquitination; RBR FAMILY RING FINGER AND IBR DOMAIN-CONTAINING; RING/U-box; RWD; RWD-domain; ""> <signature-library-release library=; TRIAD; UBC-like; ubiquitin-protein transferase activity; UBQ-conjugating_enzyme/RWD; ZF_RING_1; ZF_RING_2; Znf_RING; Znf_RING_CS; Znf_RING/FYVE/PHD	protein binding; protein ubiquitination; ubiquitin-protein transferase activity	GO:0004842; GO:0005515; GO:0016567
IR_6019	-5.7094	0.0135163	Fvb5:13918886-13919318	Fvb5	13921532	13922567	FvH4_5g22581	-	2215	Downstream TTS	0.386357	0.445405	NA	FvH4_5g22581.t1_v4.0.a2	NA	NA
IR_6672	-4.90414	0.0303409	Fvb5:27806796-27807201	Fvb5	27808504	27809932	FvH4_5g37770	+	1304	Upstream TSS	NA	NA	AT2G27080.2 | Late embryogenesis abundant (LEA) hydroxyproline-rich glycoprotein family | Chr2:11566383-11567165 FORWARD LENGTH=260 | 201606; PREDICTED: uncharacterized protein LOC101291153 [Fragaria vesca subsp. vesca]; sp|Q9ZVD2|NHL13_ARATH NDR1/HIN1-like protein 13 OS=Arabidopsis thaliana OX=3702 GN=NHL13 PE=2 SV=1; tr|A0A2P6PHR5|A0A2P6PHR5_ROSCH Uncharacterized protein OS=Rosa chinensis OX=74…	disorder_prediction; FAMILY NOT NAMED; FvH4_5g37770.t1_v4.0.a2; ""> <signature-library-release library=	NA	NA
IR_5634	-4.78301	0.0360662	Fvb5:4639338-4639782	Fvb5	4640509	4656444	FvH4_5g08020	+	728	Upstream TSS	2.47934	0.447558	AT1G26255.3 | hypothetical protein | Chr1:9083931-9085238 REVERSE LENGTH=340 | 201606; tr|A0A2P6QFG8|A0A2P6QFG8_ROSCH Uncharacterized protein OS=Rosa chinensis OX=74649 GN=RchiOBHm_Chr5g0051631 PE=4 SV=1; uncharacterized protein LOC112165215 [Rosa chinensis]	FvH4_5g08020.t1_v4.0.a2; FvH4_5g08020.t5_v4.0.a2; FvH4_5g08020.t7_v4.0.a2	NA	NA
IR_652	-3.95987	0.0199324	Fvb1:16492281-16492712	Fvb1	16495084	16495447	FvH4_1g24680	+	2373	Upstream TSS	NA	NA	AT4G30770.1 | Putative membrane lipoprotein | Chr4:14986140-14986613 REVERSE LENGTH=157 | 201606; hypothetical protein RchiOBHm_Chr2g0122171 [Rosa chinensis]; tr|A0A2P6RSQ1|A0A2P6RSQ1_ROSCH Uncharacterized protein OS=Rosa chinensis OX=74649 GN=RchiOBHm_Chr2g0122171 PE=4 SV=1	FAMILY NOT NAMED; FvH4_1g24680.t1_v4.0.a2; MEMBRANE LIPOPROTEIN-RELATED; PROKAR_LIPOPROTEIN	NA	NA
IR_1124	-3.43329	0.00510266	Fvb2:2013401-2013848	Fvb2	2010880	2011248	FvH4_2g02513	-	2153	Upstream TSS	NA	NA	uncharacterized protein LOC112171195 [Rosa chinensis]	Coil; disorder_prediction; FvH4_2g02513.t1_v4.0.a2	NA	NA
IR_5953	2.77312	0.00510266	Fvb5:12506029-12506425	Fvb5	12500415	12503318	FvH4_5g20900	+	2711	Downstream TTS	0.151777	0.748272	AT3G57150.1 | homologue of NAP57 | Chr3:21154255-21155952 REVERSE LENGTH=565 | 201606; PREDICTED: LOW QUALITY PROTEIN: H/ACA ribonucleoprotein complex subunit 4 [Fragaria vesca subsp. vesca]; sp|Q9LD90|CBF5_ARATH H/ACA ribonucleoprotein complex subunit 4 OS=Arabidopsis thaliana OX=3702 GN=CBF5 PE=1 SV=1; tr|A0A2P6P9I8|A0A2P6P9I8_ROSCH Putative tRNA pseudouridine(55) synthase OS=Rosa chinensis OX=…	CENTROMERE/MICROTUBULE BINDING PROTEIN CBF5; disorder_prediction; DKCLD; Dyskerin-like; FvH4_5g20900.t1_v4.0.a2; FvH4_5g20900.t2_v4.0.a2; FvH4_5g20900.t3_v4.0.a2; PsdUridine_synth_cat_dom_sf; PsdUridine_synth_N; Pseudouridine synthase; pseudouridine synthase activity; pseudouridine synthesis; PseudoU_synth_hDyskerin; PUA; PUA domain-like; PUA-like_sf; RNA binding; RNA modification; RNA processing…	pseudouridine synthase activity; pseudouridine synthesis; RNA binding; RNA modification; RNA processing	GO:0001522; GO:0003723; GO:0006396; GO:0009451; GO:0009982
IR_8770	3.3429	0.0149419	Fvb7:5098874-5099326	Fvb7	5099725	5108816	FvH4_7g04560	+	400	Upstream TSS	-4.34093	1.94143e-09	AT1G15740.1 | Leucine-rich repeat family protein | Chr1:5411509-5414544 FORWARD LENGTH=585 | 201606; PREDICTED: F-box/LRR-repeat protein 13-like isoform X1 [Fragaria vesca subsp. vesca] &gt;gi|764507040|ref|XP_011457369.1| PREDICTED: F-box/LRR-repeat protein 13-like isoform X1 [Fragaria vesca subsp. vesca]; sp|Q8N1E6|FXL14_HUMAN F-box/LRR-repeat protein 14 OS=Homo sapiens OX=9606 GN=FBXL14 PE=1 S…	FvH4_7g04560.t1_v4.0.a2; LEUCINE-RICH REPEAT FAMILY PROTEIN; Leu-rich_rpt; LRR_6; LRR_8; LRR_dom_sf; protein binding; RNI-like; UNCHARACTERIZED	protein binding	GO:0005515
IR_8770	3.3429	0.0149419	Fvb7:5098874-5099326	Fvb7	5095206	5097004	FvH4_7g04550	+	1870	Downstream TTS	-0.0368576	0.873878	PREDICTED: uncharacterized protein LOC101299325 [Fragaria vesca subsp. vesca]; tr|A0A2P6PMN8|A0A2P6PMN8_ROSCH Uncharacterized protein OS=Rosa chinensis OX=74649 GN=RchiOBHm_Chr6g0258741 PE=4 SV=1	FvH4_7g04550.t1_v4.0.a2	NA	NA
IR_9195	3.57748	6.9305e-10	Fvb7:15464894-15465309	Fvb7	15467223	15471989	FvH4_7g18570	+	1915	Upstream TSS	10.752	2.1477e-100	AT3G26040.1 | HXXXD-type acyl-transferase family protein | Chr3:9519741-9521069 FORWARD LENGTH=442 | 201606; PREDICTED: vinorine synthase-like [Fragaria vesca subsp. vesca]; sp|Q70PR7|VINSY_RAUSE Vinorine synthase OS=Rauvolfia serpentina OX=4060 GN=ACT PE=1 SV=2; tr|A0A1J0CLC8|A0A1J0CLC8_FRAAN Alcohol acyltransferase OS=Fragaria ananassa OX=3747 GN=AAT PE=2 SV=1	CAT-like_dom_sf; FAMILY NOT NAMED; FvH4_7g18570.t1_v4.0.a2; Glyoxylate metabolism and glycine degradation; ""> <signature-library-release library=; Transferase; transferase activity, transferring acyl groups other than amino-acyl groups	acyltransferase activity, transferring groups other than amino-acyl groups	GO:0016747
IR_9195	3.57748	6.9305e-10	Fvb7:15464894-15465309	Fvb7	15459592	15462054	FvH4_7g18550	+	2840	Downstream TTS	6.70168	4.0918e-09	AT3G54940.2 | Papain family cysteine protease | Chr3:20354402-20356127 FORWARD LENGTH=367 | 201606; probable cysteine protease RD19D [Rosa chinensis] &gt;gi|1358184243|gb|PRQ58717.1| putative cathepsin L [Rosa chinensis]; sp|Q8VYS0|RD19D_ARATH Probable cysteine protease RD19D OS=Arabidopsis thaliana OX=3702 GN=RD19D PE=2 SV=1; tr|A0A2P6SJ69|A0A2P6SJ69_ROSCH Putative cathepsin L OS=Rosa chinensis …	CYSTEINE PROTEASE FAMILY C1-RELATED; Cysteine proteinases; cysteine-type peptidase activity; FvH4_7g18550.t1_v4.0.a2; Inhibitor_I29; MHC class II antigen presentation; PAPAIN; Papain-like_cys_pep_sf; Pept_asp_AS; Pept_cys_AS; Pept_his_AS; Peptidase_C1; Peptidase_C1A; Peptidase_C1A_C; Peptidase_C1A_papain-like; proteolysis; Prot_inhib_I29; ""> <signature-library-release library=; THIOL_PROTEASE_AS…	cysteine-type peptidase activity; proteolysis	GO:0006508; GO:0008234
IR_4807	4.40332	0.0294603	Fvb4:18309748-18310446	Fvb4	18306618	18306994	FvH4_4g14610	-	2754	Upstream TSS	NA	NA	NA	FvH4_4g14610.t1_v4.0.a2	NA	NA
IR_4807	4.40332	0.0294603	Fvb4:18309748-18310446	Fvb4	18311232	18312670	FvH4_4g14620	+	787	Upstream TSS	-0.0247246	NA	PREDICTED: tyrosine--tRNA ligase, cytoplasmic [Fragaria vesca subsp. vesca]; tr|A0A2P6QGU1|A0A2P6QGU1_ROSCH Putative tyrosine--tRNA ligase OS=Rosa chinensis OX=74649 GN=RchiOBHm_Chr5g0057181 PE=3 SV=1	Coil; FvH4_4g14620.t1_v4.0.a2; Rossmann-like_a/b/a_fold	NA	NA
IR_4807	4.40332	0.0294603	Fvb4:18309748-18310446	Fvb4	18307380	18309186	FvH4_4g14611	+	562	Downstream TTS	-0.930302	0.265532	AT1G03220.1 | Eukaryotic aspartyl protease family protein | Chr1:787143-788444 FORWARD LENGTH=433 | 201606; PREDICTED: basic 7S globulin-like [Juglans regia]; tr|A0A2I4GSL3|A0A2I4GSL3_JUGRE basic 7S globulin-like OS=Juglans regia OX=51240 GN=LOC109010481 PE=3 SV=1	Acid proteases; disorder_prediction; FvH4_4g14611.t1_v4.0.a2; FvH4_4g14611.t2_v4.0.a2; Peptidase_aspartic_dom_sf; TAXi_C	NA	NA
IR_1162	9.86881	1.33416e-06	Fvb2:3158248-3158647	Fvb2	3161073	3163272	FvH4_2g04030	+	2427	Upstream TSS	NA	NA	AT5G41980.1 | nuclease | Chr5:16793765-16794889 FORWARD LENGTH=374 | 201606; PREDICTED: uncharacterized protein LOC103943817 [Pyrus x bretschneideri]; sp|Q9M2U3|ALPL_ARATH Protein ALP1-like OS=Arabidopsis thaliana OX=3702 GN=At3g55350 PE=2 SV=1; tr|A0A2N9HMW2|A0A2N9HMW2_FAGSY Uncharacterized protein OS=Fagus sylvatica OX=28930 GN=FSB_LOCUS40922 PE=4 SV=1	DDE_Tnp_4; FvH4_2g04030.t1_v4.0.a2; HARBI1_dom; ""> <signature-library-release library=; UNCHARACTERIZED	NA	NA
IR_1162	9.86881	1.33416e-06	Fvb2:3158248-3158647	Fvb2	3154323	3155597	FvH4_2g04020	+	2651	Downstream TTS	-1.22122	0.000210833	AT1G66520.1 | formyltransferase | Chr1:24816330-24818693 REVERSE LENGTH=355 | 201606; PREDICTED: methionyl-tRNA formyltransferase, mitochondrial [Fragaria vesca subsp. vesca]; sp|Q65JS5|FMT_BACLD Methionyl-tRNA formyltransferase OS=Bacillus licheniformis (strain ATCC 14580 / DSM 13 / JCM 2505 / NBRC 12200 / NCIMB 9375 / NRRL NRS-1264 / Gibson 46) OX=279010 GN=fmt PE=3 SV=1; tr|A0A2P6RGS4|A0A2P6RG…	Aminoacyl-tRNA biosynthesis; biosynthetic process; catalytic activity; conversion of methionyl-tRNA to N-formyl-methionyl-tRNA; Fmt; FMT_core_Met-tRNA-FMT_N; FMT C-terminal domain-like; Formyl_trans; Formyl_trans_C; Formyl_trans_C_sf; Formyltransferase; Formyl_transferase-like_C_sf; Formyl_transf_N; Formyl_transf_N_sf; Formyl_trans_N; FvH4_2g04020.t1_v4.0.a2; hydroxymethyl-, formyl- and related t…	biosynthetic process; catalytic activity; conversion of methionyl-tRNA to N-formyl-methionyl-tRNA; hydroxymethyl-, formyl- and related transferase activity; methionyl-tRNA formyltransferase activity	GO:0003824; GO:0004479; GO:0009058; GO:0016742; GO:0071951
