# Supplementary material for: Naturally occurring variation in gene-associated transposable elements impacts gene expression and phenotypic diversity in woodland strawberry
Source: Research Square preprint supplement (doi:10.21203/rs.3.rs-6266511/v1), 2025-04-22
Supplement: Supplementary file 6 [file d374ded82d329c663fd387b3.xlsx]

## Sheet: Fvesca_Ripe-vs-Leaf_genes
Gene_ID	baseMean	log2FoldChange	lfcSE	stat	pvalue	padj
FvH4_1g00010	549.798	0.917074	0.510693	1.79575	0.0725351	0.121546
FvH4_1g00020	122.744	-1.18438	0.282974	-4.18548	2.84567e-05	9.98172e-05
FvH4_1g00030	132.77	-3.00049	0.510411	-5.87857	4.13833e-09	2.47812e-08
FvH4_1g00040	2265.69	-2.23573	0.259695	-8.60905	7.36664e-18	1.05713e-16
FvH4_1g00050	108.14	-0.956757	0.288511	-3.31619	0.000912526	0.00243703
FvH4_1g00060	35.2435	-6.99069	0.679304	-10.291	7.74021e-25	1.93263e-23
FvH4_1g00070	2803.44	0.834128	0.217114	3.8419	0.000122087	0.000385999
FvH4_1g00080	503.444	0.784955	0.243091	3.22905	0.00124202	0.00323285
FvH4_1g00090	2258.86	0.173592	0.358493	0.484226	0.628226	0.71329
FvH4_1g00100	234.759	-2.88602	0.3026	-9.5374	1.46463e-21	2.8345e-20
FvH4_1g00110	613.864	0.554767	0.427046	1.29908	0.193916	0.278596
FvH4_1g00120	55.8633	1.23391	0.515129	2.39534	0.0166048	0.0336548
FvH4_1g00130	67.8688	-1.80542	0.311947	-5.7876	7.13975e-09	4.151e-08
FvH4_1g00150	7.32426	-2.81374	2.03608	-1.38194	0.16699	0.245996
FvH4_1g00160	242.566	-2.31073	0.248841	-9.28598	1.60227e-20	2.86997e-19
FvH4_1g00191	670.412	-0.045495	0.216719	-0.209926	0.833725	0.88637
FvH4_1g00200	830.467	-0.688425	0.668545	-1.02974	0.303134	0.401855
FvH4_1g00201	239.185	2.48112	0.590257	4.20345	2.62872e-05	9.27744e-05
FvH4_1g00210	890.91	3.53362	0.602036	5.86945	4.37238e-09	2.60642e-08
FvH4_1g00220	3.54795	-0.791147	1.18768	-0.66613	0.505328	0.603652
FvH4_1g00230	121.741	0.218513	0.460556	0.474454	0.635176	0.719466
FvH4_1g00240	226.063	-3.31076	0.461249	-7.17781	7.08368e-13	6.44736e-12
FvH4_1g00250	607.009	1.05672	0.242155	4.36381	1.27818e-05	4.72965e-05
FvH4_1g00300	2.39797	-7.11261	4.90507	-1.45005	0.147044	0.220976
FvH4_1g00330	735.202	6.38334	0.684353	9.32755	1.08346e-20	1.96558e-19
FvH4_1g00340	65.4051	7.12275	1.34466	5.29705	1.17687e-07	5.80573e-07
FvH4_1g00341	7.88123	-2.8602	1.10931	-2.57836	0.00992693	0.0212809
FvH4_1g00342	349.221	1.1121	0.880549	1.26297	0.206601	0.293335
FvH4_1g00343	212.78	-4.8034	0.832139	-5.77235	7.81725e-09	4.51672e-08
FvH4_1g00344	107.694	0.197716	0.809235	0.244325	0.806979	0.864809
FvH4_1g00345	1803.67	6.14951	0.43219	14.2287	6.07812e-46	5.27053e-44
FvH4_1g00346	354.901	-0.238315	0.504025	-0.472825	0.636338	0.720302
FvH4_1g00350	493.759	3.10236	0.409347	7.5788	3.48757e-14	3.60721e-13
FvH4_1g00360	202.333	-2.00248	0.475961	-4.20724	2.5851e-05	9.13215e-05
FvH4_1g00370	1794.59	0.55796	0.318303	1.75292	0.0796152	0.131762
FvH4_1g00380	725.325	1.8032	0.212386	8.49022	2.06244e-17	2.8482e-16
FvH4_1g00390	543.494	3.7356	0.792875	4.71147	2.45939e-06	1.01161e-05
FvH4_1g00400	400.754	-10.1054	1.08948	-9.27544	1.76887e-20	3.16079e-19
FvH4_1g00410	582.175	-0.157682	0.374633	-0.420898	0.673829	0.753105
FvH4_1g00420	395.841	4.67007	0.581155	8.03585	9.29352e-16	1.10534e-14
FvH4_1g00421	3.57254	-6.24914	1.79227	-3.48673	0.000488971	0.00137982
FvH4_1g00430	282.206	-0.0142267	0.411988	-0.0345318	0.972453	0.987231
FvH4_1g00440	899.521	0.342726	0.716978	0.478014	0.63264	0.717135
FvH4_1g00450	91.8169	-1.61876	0.455563	-3.55332	0.000380401	0.00109797
FvH4_1g00460	125.754	-2.34042	0.831373	-2.81513	0.00487574	0.0112384
FvH4_1g00470	182.134	-0.790722	0.317838	-2.48782	0.012853	0.0268135
FvH4_1g00480	342.128	-0.562236	0.220147	-2.55391	0.010652	0.0226873
FvH4_1g00490	89.0983	-0.0851419	0.33865	-0.251416	0.801493	0.860536
FvH4_1g00500	204.636	-7.90581	0.700824	-11.2807	1.63372e-29	5.46333e-28
FvH4_1g00510	1423.64	0.996802	0.238953	4.17153	3.02556e-05	0.000105696
FvH4_1g00530	560.592	0.00650486	0.343031	0.0189629	0.984871	0.995848
FvH4_1g00540	377.094	-7.39385	0.458144	-16.1387	1.36383e-58	2.40248e-56
FvH4_1g00550	414.505	0.475788	0.41915	1.13513	0.256323	0.350195
FvH4_1g00560	164.152	0.661358	0.445737	1.48374	0.137878	0.209395
FvH4_1g00580	65.9533	-1.16001	0.264055	-4.39306	1.11766e-05	4.18762e-05
FvH4_1g00590	203.898	-1.63547	0.272283	-6.0065	1.89571e-09	1.18464e-08
FvH4_1g00620	5.81656	-3.80903	1.15843	-3.2881	0.00100867	0.00267433
FvH4_1g00630	161.836	1.76887	0.345391	5.12136	3.03336e-07	1.42001e-06
FvH4_1g00640	524.617	1.53039	0.419491	3.64821	0.000264074	0.000783223
FvH4_1g00650	80.2675	-1.44748	0.258056	-5.60917	2.03298e-08	1.11203e-07
FvH4_1g00660	145.124	-3.40697	0.293907	-11.592	4.5235e-31	1.69514e-29
FvH4_1g00670	24.028	-4.98051	0.605455	-8.22607	1.93456e-16	2.43419e-15
FvH4_1g00680	20.4509	-0.455451	0.466199	-0.976944	0.328597	0.428701
FvH4_1g00690	339.389	-2.48233	0.376074	-6.60066	4.09326e-11	3.09478e-10
FvH4_1g00700	3.047	-0.376824	1.48926	-0.253027	0.800247	0.859529
FvH4_1g00710	868.702	4.37958	0.97996	4.46915	7.85326e-06	3.01205e-05
FvH4_1g00720	1009.19	0.554331	0.139433	3.97562	7.01963e-05	0.00023149
FvH4_1g00730	88.3128	-1.16673	0.386915	-3.01548	0.00256573	0.00628288
FvH4_1g00750	12.9192	2.44621	1.42968	1.71101	0.0870786	0.14196
FvH4_1g00760	192.125	1.02347	0.287609	3.55855	0.00037291	0.00107718
FvH4_1g00770	330.004	-2.26746	0.388402	-5.83791	5.28602e-09	3.12111e-08
FvH4_1g00780	79.051	-0.195781	0.430655	-0.454613	0.649388	0.731489
FvH4_1g00800	63.0971	1.80319	0.43805	4.11642	3.8481e-05	0.000131979
FvH4_1g00810	393.761	-0.575473	0.421728	-1.36456	0.172392	0.252702
FvH4_1g00811	0.733697	2.74581	2.90272	0.945945	0.344177	0.445597
FvH4_1g00820	2.31504	-7.03989	3.94621	-1.78396	0.0744297	0.124329
FvH4_1g00830	1473.84	0.818002	0.136895	5.97537	2.29562e-09	1.42304e-08
FvH4_1g00860	34.2219	-3.09624	0.448554	-6.90273	5.10122e-12	4.27272e-11
FvH4_1g00870	586.115	0.557525	0.328348	1.69797	0.0895129	0.145241
FvH4_1g00880	230.991	-0.250256	0.502318	-0.498202	0.618342	0.705073
FvH4_1g00890	182.347	-0.263299	0.27488	-0.957869	0.338129	0.439063
FvH4_1g00910	5.00533	0.829218	1.12406	0.737702	0.460696	0.562408
FvH4_1g00920	314.537	0.52439	0.583794	0.898244	0.369055	0.470637
FvH4_1g00930	3021.16	1.83798	0.342163	5.37164	7.80257e-08	3.9395e-07
FvH4_1g00940	236.086	1.09802	0.352187	3.11772	0.00182257	0.00460157
FvH4_1g00950	206.747	1.319	0.2371	5.56307	2.65069e-08	1.42345e-07
FvH4_1g00960	185.512	1.04005	0.497978	2.08855	0.0367486	0.0676992
FvH4_1g00970	177.741	0.668639	0.469794	1.42326	0.15466	0.230425
FvH4_1g00971	207.715	-1.34833	0.299064	-4.50849	6.52904e-06	2.53282e-05
FvH4_1g00990	6472.35	-0.0372914	0.139909	-0.26654	0.789823	0.851152
FvH4_1g01000	81.6138	-2.9231	0.432927	-6.75194	1.45885e-11	1.16313e-10
FvH4_1g01010	539.931	-0.327817	0.222609	-1.47261	0.140855	0.213366
FvH4_1g01020	83.0643	-2.88165	0.602222	-4.78503	1.70965e-06	7.19224e-06
FvH4_1g01030	551.596	-3.21895	0.365589	-8.80483	1.31055e-18	2.05607e-17
FvH4_1g01040	30.298	-4.03449	0.719333	-5.60865	2.03911e-08	1.11483e-07
FvH4_1g01050	399.213	-1.93706	0.573468	-3.3778	0.000730675	0.00199301
FvH4_1g01060	100.338	0.282592	0.478645	0.5904	0.554922	0.649204
FvH4_1g01070	2269.16	-0.944781	0.891157	-1.06017	0.289066	0.386874
FvH4_1g01090	173.545	0.146001	0.388632	0.375679	0.707155	0.781066
FvH4_1g01100	105.78	0.375387	0.323591	1.16007	0.246021	0.338665
FvH4_1g01110	217.067	-5.42085	0.952822	-5.68926	NA	NA
FvH4_1g01120	78.0441	-0.684972	0.469893	-1.45772	0.144918	0.218339
FvH4_1g01130	844.01	-5.09844	0.627618	-8.12347	4.53037e-16	5.51133e-15
FvH4_1g01140	450.796	0.747863	0.675728	1.10675	0.268402	0.363795
FvH4_1g01150	199.871	-0.00286461	0.318567	-0.00899218	0.992825	1
FvH4_1g01160	330.852	2.31106	0.456375	5.06396	4.10645e-07	1.88877e-06
FvH4_1g01170	480.172	0.506229	0.423247	1.19606	0.231673	0.322465
FvH4_1g01180	823.129	0.511974	0.471932	1.08485	0.27799	0.374521
FvH4_1g01190	17.346	-7.41053	1.02477	-7.23139	4.78091e-13	4.41612e-12
FvH4_1g01200	18.9289	-1.46662	0.516764	-2.83809	0.00453845	0.0105391
FvH4_1g01202	61.5579	4.28451	0.923496	4.63945	3.49346e-06	1.40897e-05
FvH4_1g01210	2.82986	-0.211452	1.47052	-0.143795	0.885663	0.922817
FvH4_1g01220	2.66817	-2.09511	1.52893	-1.37032	0.170588	0.250568
FvH4_1g01230	14.8025	-0.367686	0.957052	-0.384186	0.70084	0.775891
FvH4_1g01240	4.44949	-3.09673	2.33449	-1.32652	0.184669	0.267405
FvH4_1g01250	1396.31	0.22691	0.182628	1.24247	0.214063	0.301922
FvH4_1g01260	1107.69	0.837186	0.378788	2.21017	0.0270934	0.0517754
FvH4_1g01270	73.5255	-0.708665	0.292432	-2.42335	0.0153781	0.0314277
FvH4_1g01280	555.05	-0.666573	0.424312	-1.57095	0.116194	0.181251
FvH4_1g01290	64.4852	0.0665118	0.410444	0.162048	0.871268	0.91306
FvH4_1g01300	43.697	1.04424	0.4383	2.38247	0.0171967	0.0347099
FvH4_1g01310	45.4104	-1.25671	0.50816	-2.47307	0.013396	0.0278113
FvH4_1g01320	77.8414	0.42044	0.336973	1.2477	0.212143	0.299757
FvH4_1g01321	4.11252	-7.86641	3.36114	-2.3404	0.019263	0.0382966
FvH4_1g01322	1.07623	-5.95793	4.92081	-1.21076	0.225987	0.315806
FvH4_1g01350	12.6468	-1.08106	0.556151	-1.94383	0.0519161	0.0913116
FvH4_1g01360	33.0015	0.672698	0.92043	0.730852	0.46487	0.56633
FvH4_1g01363	19.0309	1.01051	0.630973	1.60152	0.109262	0.17214
FvH4_1g01365	8.75824	0.661501	0.780733	0.847283	0.396838	0.498599
FvH4_1g01380	19.9432	1.00814	1.22736	0.821392	0.411423	0.513578
FvH4_1g01381	13.9623	-1.18655	0.626711	-1.89329	0.0583191	0.100867
FvH4_1g01382	9.38026	-6.55439	1.46483	-4.4745	7.65903e-06	2.94159e-05
FvH4_1g01383	9.37055	2.54411	1.51638	1.67775	0.0933957	0.150699
FvH4_1g01390	32.3619	0.836223	0.582308	1.43605	0.150989	0.225872
FvH4_1g01420	12.7185	-1.82677	0.798178	-2.28868	0.0220978	0.0432825
FvH4_1g01430	109.295	1.90068	0.363856	5.22372	1.75363e-07	8.48632e-07
FvH4_1g01440	1232.39	0.727214	0.49122	1.48043	0.13876	0.210563
FvH4_1g01450	85.1501	-0.547717	0.484783	-1.12982	0.258553	0.35274
FvH4_1g01460	10.0983	2.00833	0.924106	2.17327	0.0297602	0.0562518
FvH4_1g01480	111.496	0.783521	0.385905	2.03035	0.0423214	0.0764484
FvH4_1g01490	227.011	2.90918	0.719249	4.04474	5.23815e-05	0.000176143
FvH4_1g01491	33.2469	-1.66377	0.570381	-2.91694	0.00353487	0.00841747
FvH4_1g01500	3.59321	3.55462	1.82161	1.95136	0.0510137	0.0900134
FvH4_1g01520	36.2864	-3.96141	0.84588	-4.68318	2.82465e-06	1.1519e-05
FvH4_1g01530	208.488	2.42456	0.381949	6.34788	2.18306e-10	1.5144e-09
FvH4_1g01540	265.268	0.912855	0.76037	1.20054	0.22993	0.320478
FvH4_1g01550	1331.67	-0.788852	0.597025	-1.32131	0.1864	0.26958
FvH4_1g01560	83.3873	-3.76003	0.755337	-4.97794	6.42633e-07	2.87023e-06
FvH4_1g01570	1096.67	-1.99365	0.570563	-3.49418	0.00047552	0.00134543
FvH4_1g01590	622.68	0.378557	0.220913	1.7136	0.0866014	0.141368
FvH4_1g01600	2.04002	-4.37303	3.68155	-1.18782	0.234903	0.32617
FvH4_1g01610	813.821	4.93294	0.267001	18.4754	3.25782e-76	1.17555e-73
FvH4_1g01620	26.7291	7.64394	1.74574	4.37864	1.19423e-05	4.44992e-05
FvH4_1g01660	170.915	-0.248806	0.290785	-0.855639	0.392198	0.494073
FvH4_1g01700	3.5076	0.725519	1.601	0.453165	0.65043	0.732442
FvH4_1g01701	250.609	-0.337071	0.436468	-0.772271	0.439954	0.542205
FvH4_1g01710	92.0738	-3.23574	0.2711	-11.9356	7.7218e-33	3.22299e-31
FvH4_1g01720	464.155	-0.521815	0.431963	-1.20801	0.227044	0.317068
FvH4_1g01730	239.511	1.41753	0.536776	2.64083	0.00827036	0.0180653
FvH4_1g01750	910.204	1.62399	0.561531	2.89207	0.00382711	0.00903738
FvH4_1g01760	13.1996	-0.402357	0.662377	-0.607444	0.543556	0.639115
FvH4_1g01770	393.57	1.84711	0.576578	3.20357	0.00135733	0.00350892
FvH4_1g01771	8097.33	-4.28616	0.749586	-5.71803	1.07767e-08	6.12232e-08
FvH4_1g01772	2192.62	-8.91712	0.612568	-14.5569	5.27631e-48	5.11002e-46
FvH4_1g01790	231.4	-3.12579	0.40226	-7.77058	7.81293e-15	8.57109e-14
FvH4_1g01800	158.18	0.952234	0.576788	1.65093	0.0987536	0.158011
FvH4_1g01810	309.826	0.838097	0.403271	2.07825	0.0376867	0.0691501
FvH4_1g01820	532.253	0.816135	0.169893	4.80383	1.5566e-06	6.59675e-06
FvH4_1g01830	7.67376	4.72431	1.59145	2.96856	0.00299197	0.00723716
FvH4_1g01840	28.1989	-10.5381	1.47721	-7.13378	9.76519e-13	8.77025e-12
FvH4_1g01870	152.134	-1.17016	0.305223	-3.83379	0.000126182	0.000397823
FvH4_1g01880	1383.84	2.80974	0.755196	3.72054	0.000198794	0.000604618
FvH4_1g01890	187.732	3.76767	1.03594	3.63697	0.000275869	0.000815289
FvH4_1g01891	356.708	0.286416	0.16311	1.75597	0.0790927	0.130984
FvH4_1g01900	6.73876	3.6747	1.86119	1.97438	0.0483384	0.085739
FvH4_1g01910	12.8822	5.72616	1.70297	3.36246	0.000772506	0.00209383
FvH4_1g01920	4.56929	4.11426	2.258	1.82208	0.0684425	0.115728
FvH4_1g01930	610.15	-5.40103	0.774621	-6.97248	3.114e-12	2.66717e-11
FvH4_1g01960	325.899	1.75604	0.588428	2.98429	0.00284234	0.00690282
FvH4_1g01970	86.4491	-7.42152	0.545482	-13.6054	3.71745e-42	2.57483e-40
FvH4_1g01971	42.1018	-1.3249	0.401568	-3.29932	0.000969202	0.00257738
FvH4_1g01990	500.303	1.38587	0.165818	8.35774	6.39309e-17	8.4511e-16
FvH4_1g02000	395.672	0.474216	0.435827	1.08808	0.276559	0.373013
FvH4_1g02010	152.003	0.706505	0.289038	2.44433	0.0145121	0.0298349
FvH4_1g02011	1.05511	3.53663	3.75687	0.941376	0.346512	0.448128
FvH4_1g02012	0.943526	2.82982	4.01865	0.704173	0.481325	0.581814
FvH4_1g02020	563.026	1.61399	0.612043	2.63705	0.008363	0.0182303
FvH4_1g02030	512.914	0.54775	0.18867	2.90322	0.00369352	0.00875782
FvH4_1g02070	41.4304	-0.682257	0.480213	-1.42074	0.155393	0.231393
FvH4_1g02080	452.402	-0.780097	0.445516	-1.751	0.0799466	0.132183
FvH4_1g02100	12.9401	-1.0166	0.818687	-1.24175	0.21433	0.302256
FvH4_1g02110	130.319	-0.50351	0.201799	-2.49511	0.0125917	0.0263272
FvH4_1g02111	7.94383	-0.699502	0.859274	-0.814061	0.41561	0.517678
FvH4_1g02112	266.565	8.10899	1.49781	5.41389	6.16697e-08	3.14923e-07
FvH4_1g02120	20227.1	12.5335	1.09834	11.4114	3.66879e-30	1.29054e-28
FvH4_1g02121	474.235	1.08162	0.39485	2.73932	0.00615664	0.0138861
FvH4_1g02150	688.495	3.47928	0.444059	7.83518	4.6816e-15	5.23161e-14
FvH4_1g02151	71.3339	-8.18395	1.23119	-6.64719	2.98747e-11	2.30547e-10
FvH4_1g02152	42.6156	-4.07684	0.588212	-6.9309	4.18179e-12	3.53552e-11
FvH4_1g02160	87.4797	-12.299	1.27468	-9.64871	4.978e-22	1.00603e-20
FvH4_1g02170	240.834	-3.25547	0.538298	-6.0477	1.46924e-09	9.28791e-09
FvH4_1g02190	2222.57	2.53106	0.54943	4.60671	4.09098e-06	1.63376e-05
FvH4_1g02200	59.394	-0.932891	0.601905	-1.5499	0.121166	0.187658
FvH4_1g02210	69.3941	-0.451735	0.321676	-1.40432	0.160224	0.237481
FvH4_1g02220	39.6295	-1.81433	0.407377	-4.45368	8.44104e-06	3.22038e-05
FvH4_1g02230	254.213	0.456559	0.346625	1.31715	0.187787	0.271236
FvH4_1g02250	0.879974	-3.34563	3.41602	-0.979395	0.327385	0.427469
FvH4_1g02270	123.032	1.77278	0.359996	4.92445	8.46e-07	3.72573e-06
FvH4_1g02310	89.454	-2.39492	0.618004	-3.87525	0.000106515	0.000339936
FvH4_1g02340	553.398	-0.11163	0.169616	-0.658136	0.510451	0.608472
FvH4_1g02350	0.697323	1.97191	2.89385	0.681413	0.49561	0.59503
FvH4_1g02370	5.24255	4.9605	1.61774	3.06632	0.00216712	0.0053834
FvH4_1g02380	20.4974	0.666226	0.713837	0.933303	0.350664	0.45246
FvH4_1g02382	1.2104	2.5762	3.99865	0.644267	0.519402	0.616997
FvH4_1g02420	214.153	-0.313794	0.412598	-0.760531	0.446937	0.548982
FvH4_1g02430	153.759	1.5703	0.574869	2.73158	0.00630317	0.0141837
FvH4_1g02440	1211.9	-0.444572	0.249676	-1.7806	0.0749784	0.125152
FvH4_1g02450	699.135	0.993937	0.261028	3.80778	0.000140219	0.000438799
FvH4_1g02451	2.03286	4.62093	2.11225	2.18768	0.0286929	0.054469
FvH4_1g02460	413.12	1.70435	0.415558	4.10135	4.10754e-05	0.000140296
FvH4_1g02470	390.584	1.92924	0.257025	7.50604	6.09433e-14	6.15541e-13
FvH4_1g02480	2.99584	4.12841	1.91794	2.15253	0.0313559	0.0588799
FvH4_1g02481	14.3895	-3.28545	1.03467	-3.17537	0.00149647	0.00384198
FvH4_1g02490	2306.16	2.24982	0.291241	7.72493	1.11914e-14	1.20895e-13
FvH4_1g02500	458.521	-2.43555	0.454267	-5.3615	8.25321e-08	4.1539e-07
FvH4_1g02520	1.28581	-0.516353	2.84286	-0.181632	0.855872	0.902208
FvH4_1g02530	177.94	0.945117	0.256591	3.68336	0.000230176	0.00069158
FvH4_1g02540	692.293	-1.15333	0.263374	-4.37907	1.19189e-05	4.44194e-05
FvH4_1g02550	148.906	-0.324273	0.313609	-1.03401	0.301134	0.399962
FvH4_1g02560	6.42033	-7.2983	1.82366	-4.002	6.28088e-05	0.000208604
FvH4_1g02570	4015.91	-15.8626	1.50338	-10.5513	NA	NA
FvH4_1g02580	305.504	0.362714	0.413556	0.877062	0.380453	0.482292
FvH4_1g02590	77.6489	0.381681	0.331321	1.152	0.249321	0.342386
FvH4_1g02620	669.565	3.79634	0.669453	5.6708	1.42133e-08	7.94553e-08
FvH4_1g02621	389.697	-0.611171	0.39738	-1.538	0.124048	0.191298
FvH4_1g02623	30.8143	4.19296	0.731532	5.73176	9.93953e-09	5.67553e-08
FvH4_1g02630	2.48807	-4.61715	1.75095	-2.63695	0.00836558	0.0182306
FvH4_1g02650	74.7227	-0.967781	0.505282	-1.91533	0.0554509	0.0967137
FvH4_1g02660	668.02	-0.156518	0.38467	-0.40689	0.684089	0.761979
FvH4_1g02670	78.9431	-1.68918	0.672112	-2.51325	0.0119624	0.0251526
FvH4_1g02680	834.842	0.0776454	0.242692	0.319935	0.749018	0.817536
FvH4_1g02690	5.05919	-5.61582	1.77075	-3.17145	0.00151682	0.00388665
FvH4_1g02700	19.1551	-7.07702	1.00724	-7.02617	2.12273e-12	1.85001e-11
FvH4_1g02710	89.7595	0.255646	0.426367	0.599592	0.548778	0.643901
FvH4_1g02720	517.284	8.10907	0.960182	8.44534	3.03151e-17	4.10043e-16
FvH4_1g02730	2983.28	3.26302	0.318692	10.2388	1.32875e-24	3.25239e-23
FvH4_1g02740	0.530369	-0.516375	3.98725	-0.129507	0.896957	0.930738
FvH4_1g02750	1.03689	-3.99509	2.66238	-1.50057	0.133467	0.203775
FvH4_1g02760	288.126	3.70246	0.652883	5.67094	1.42014e-08	7.94086e-08
FvH4_1g02770	20.2661	5.0329	1.37521	3.65972	0.000252488	0.000752553
FvH4_1g02780	116.587	1.13777	0.356844	3.18842	0.00143052	0.00368379
FvH4_1g02800	37.7138	-1.664	0.404137	-4.11741	3.83148e-05	0.000131429
FvH4_1g02820	319.467	-0.502725	0.594012	-0.846322	0.397373	0.499076
FvH4_1g02840	13.1096	-9.19832	2.11023	-4.35891	1.3071e-05	4.82706e-05
FvH4_1g02850	72.9076	0.63609	0.490339	1.29724	0.194547	0.279323
FvH4_1g02860	0.990992	1.70824	3.07044	0.556351	0.577971	0.669391
FvH4_1g02870	0.702751	1.7058	2.35192	0.72528	0.46828	0.569442
FvH4_1g02880	16.8517	-0.608007	0.891681	-0.681866	0.495324	0.594843
FvH4_1g02890	121.124	-4.54502	0.720591	-6.30736	2.8384e-10	1.94073e-09
FvH4_1g02900	7.1665	-7.54698	1.89537	-3.9818	6.83961e-05	0.000225887
FvH4_1g02950	32.9479	-9.69281	1.33178	-7.27809	3.38589e-13	3.18408e-12
FvH4_1g02980	1.73358	-2.05234	1.7301	-1.18626	0.235522	0.326846
FvH4_1g02990	255.346	0.274627	0.267357	1.02719	0.30433	0.403226
FvH4_1g03000	3.52095	-2.90868	1.04816	-2.77502	0.00551986	0.0125767
FvH4_1g03001	3.21021	-5.41065	1.73422	-3.11993	0.00180896	0.00457083
FvH4_1g03010	207.175	-10.0831	0.81661	-12.3475	5.0233e-35	2.28417e-33
FvH4_1g03020	553.192	-1.4674	0.465422	-3.15283	0.00161696	0.00412952
FvH4_1g03040	142.165	-11.0598	1.24431	-8.88832	6.20386e-19	9.97791e-18
FvH4_1g03050	292.951	-0.498621	0.323419	-1.54172	0.123142	0.190087
FvH4_1g03060	14.2419	0.184642	0.922335	0.20019	0.841332	0.891703
FvH4_1g03080	70.5137	-1.58334	0.70932	-2.23219	0.0256021	0.0492113
FvH4_1g03090	731.498	1.03557	0.493276	2.09938	0.0357835	0.0661228
FvH4_1g03100	43.9255	-3.19577	0.519075	-6.15665	7.42995e-10	4.84756e-09
FvH4_1g03120	2.6417	-1.55142	1.62738	-0.95332	0.340428	0.441408
FvH4_1g03130	271.777	0.303263	0.246361	1.23097	0.218334	0.306858
FvH4_1g03140	184.742	-0.170212	0.300899	-0.56568	0.571612	0.664144
FvH4_1g03150	260.93	1.95395	0.300244	6.50788	7.62202e-11	5.6166e-10
FvH4_1g03160	368.137	3.28561	0.704415	4.6643	3.09664e-06	1.25526e-05
FvH4_1g03170	144.67	5.49859	0.695091	7.9106	2.56145e-15	2.93419e-14
FvH4_1g03180	285.636	0.571574	0.275634	2.07367	0.0381095	0.0698
FvH4_1g03190	12.5751	-9.50165	4.89462	-1.94124	0.0522289	0.0917739
FvH4_1g03200	29.9252	-2.76683	0.772272	-3.58271	0.000340053	0.000989937
FvH4_1g03202	15.162	-2.45134	1.18579	-2.06725	0.0387103	0.0707596
FvH4_1g03240	727.476	1.30997	0.368665	3.55327	0.000380476	0.00109804
FvH4_1g03260	1267.32	-1.05527	0.481522	-2.19153	0.0284137	0.0539895
FvH4_1g03270	160.286	-1.66688	0.570447	-2.92205	0.00347732	0.00829366
FvH4_1g03280	593.757	3.62933	0.423939	8.56097	1.11926e-17	1.57782e-16
FvH4_1g03290	174.952	10.8241	1.46833	7.37168	1.68496e-13	1.6354e-12
FvH4_1g03300	1089.84	12.4614	1.5831	7.87153	3.50323e-15	3.97033e-14
FvH4_1g03310	680.294	12.679	1.53425	8.26395	1.40934e-16	1.79656e-15
FvH4_1g03311	2.69589	4.9436	2.92853	1.68808	0.0913956	0.147905
FvH4_1g03320	408.993	1.07831	0.328829	3.27923	0.00104089	0.0027516
FvH4_1g03330	4.23163	-3.89378	1.05973	-3.67431	0.000238496	0.000714848
FvH4_1g03331	19.0101	-2.51292	0.519096	-4.84096	1.29215e-06	5.55604e-06
FvH4_1g03340	468.224	-1.44168	0.293619	-4.91003	9.10643e-07	3.99078e-06
FvH4_1g03350	46.8358	-0.361376	0.377946	-0.95616	0.338992	0.439912
FvH4_1g03360	944.194	0.45122	0.869671	0.51884	0.603872	0.692031
FvH4_1g03370	33.1858	-7.35576	1.73904	-4.22978	2.33917e-05	8.32647e-05
FvH4_1g03371	393.235	3.18417	0.544786	5.84481	5.07157e-09	3.004e-08
FvH4_1g03372	308.311	0.322369	0.1876	1.71839	0.0857253	0.140177
FvH4_1g03410	471.117	0.580148	0.237648	2.4412	0.0146385	0.030059
FvH4_1g03420	41.9257	-11.2178	2.76963	-4.0503	5.1152e-05	0.000172216
FvH4_1g03430	10.4422	-0.50353	0.848189	-0.593653	0.552744	0.6474
FvH4_1g03440	9.72622	0.412654	0.837351	0.492808	0.622148	0.708042
FvH4_1g03450	2.43308	1.82285	1.6552	1.10129	0.27077	0.366531
FvH4_1g03460	1164.01	1.19981	0.389619	3.07945	0.00207386	0.00517298
FvH4_1g03470	384.482	1.74519	0.362874	4.80937	1.51406e-06	6.424e-06
FvH4_1g03480	0.644475	-3.36969	3.59587	-0.937099	0.348708	0.450391
FvH4_1g03481	5.07309	1.05607	1.7084	0.618164	0.536467	0.632243
FvH4_1g03490	907.022	0.25255	0.355562	0.710283	0.477529	0.578255
FvH4_1g03500	1132.15	1.13265	0.562286	2.01436	0.0439713	0.0789887
FvH4_1g03510	18.1698	-9.93012	1.4612	-6.79585	1.07676e-11	8.71223e-11
FvH4_1g03520	80.5325	-0.569981	0.337812	-1.68727	0.0915511	0.148118
FvH4_1g03540	177.504	0.642132	0.580202	1.10674	0.268407	0.363795
FvH4_1g03541	39.5565	-4.16674	0.53045	-7.85509	3.99476e-15	4.50004e-14
FvH4_1g03542	1.64356	-4.24356	3.52586	-1.20356	0.228762	0.319128
FvH4_1g03550	96.2487	1.17327	0.257464	4.55704	5.18788e-06	2.04229e-05
FvH4_1g03560	11.8325	0.128756	1.45167	0.0886951	0.929324	0.954365
FvH4_1g03570	518.475	0.392582	0.363964	1.07863	0.280754	0.377557
FvH4_1g03571	6.57432	1.22558	1.06026	1.15593	0.247712	0.340447
FvH4_1g03572	4.80523	0.65214	0.956429	0.681848	0.495335	0.594843
FvH4_1g03580	919.499	0.637551	0.129941	4.90648	9.27242e-07	4.06034e-06
FvH4_1g03590	114.308	-2.48061	0.510084	-4.86314	1.15537e-06	4.99863e-06
FvH4_1g03600	959.234	0.356775	0.377111	0.946074	0.344111	0.445589
FvH4_1g03610	134.494	3.15506	0.320949	9.83041	8.32781e-23	1.76765e-21
FvH4_1g03630	340.215	1.1566	1.06503	1.08597	0.277491	0.374023
FvH4_1g03650	48.9303	2.57647	1.00623	2.56052	0.0104516	0.0223033
FvH4_1g03680	210.399	-2.32587	0.546658	-4.25471	2.09317e-05	7.50456e-05
FvH4_1g03690	45.0472	-0.0485884	0.428976	-0.113266	0.90982	0.939857
FvH4_1g03720	236.556	2.0592	0.495942	4.15209	3.29459e-05	0.000114451
FvH4_1g03730	350.376	1.78059	0.348609	5.10771	3.26079e-07	1.52044e-06
FvH4_1g03750	2.14857	1.65545	2.03731	0.812568	0.416466	0.518601
FvH4_1g03760	1.46548	-1.82596	2.57997	-0.707747	0.479102	0.579816
FvH4_1g03770	32.3986	-3.29849	1.03516	-3.18646	0.00144025	0.00370828
FvH4_1g03790	48.8581	-2.46619	0.669234	-3.68509	0.000228618	0.000687266
FvH4_1g03800	5.15625	-6.57948	1.52656	-4.31001	1.63251e-05	5.95313e-05
FvH4_1g03810	1.22758	-6.15623	4.91715	-1.25199	0.210573	0.297935
FvH4_1g03830	1503.4	-0.59529	0.318541	-1.8688	0.0616506	0.105811
FvH4_1g03840	313.597	0.255917	0.318057	0.804629	0.421034	0.523269
FvH4_1g03850	534.467	-0.250509	0.418496	-0.598594	0.549444	0.644412
FvH4_1g03860	1.86823	-4.45749	1.67095	-2.66764	0.00763856	0.016858
FvH4_1g03880	422.779	0.969168	0.690118	1.40435	0.160214	0.237481
FvH4_1g03900	84.811	1.67219	0.570748	2.92982	0.00339155	0.00810292
FvH4_1g03910	27.5947	-4.91792	1.0802	-4.55277	5.29443e-06	2.08167e-05
FvH4_1g03920	4717.67	2.3845	0.444173	5.36841	7.9434e-08	4.00608e-07
FvH4_1g03930	130.05	0.453236	0.358297	1.26497	0.205881	0.292443
FvH4_1g03950	259.256	0.927037	0.26906	3.44546	0.000570085	0.00158809
FvH4_1g03960	101.589	-1.87133	0.511891	-3.65572	0.000256463	0.000762774
FvH4_1g03970	110.312	-5.19786	0.687162	-7.56424	3.90142e-14	4.00931e-13
FvH4_1g03980	1821.28	1.15749	0.392245	2.95093	0.00316819	0.00762227
FvH4_1g03990	1200.28	1.22646	0.248165	4.94212	7.72761e-07	3.42002e-06
FvH4_1g04000	38.5808	-9.3611	1.45055	-6.45348	1.09312e-10	7.90919e-10
FvH4_1g04010	423.193	-1.47365	0.379564	-3.88248	0.000103395	0.000330734
FvH4_1g04020	324.591	-1.22186	0.651531	-1.87536	0.0607431	0.104518
FvH4_1g04030	43.7327	-8.08402	1.20855	-6.68904	2.24647e-11	1.75543e-10
FvH4_1g04040	71.7086	-1.98433	0.390996	-5.07506	3.87372e-07	1.7876e-06
FvH4_1g04050	126.819	-0.270144	1.41905	-0.19037	0.849019	0.897225
FvH4_1g04051	4.94075	-1.06964	0.894396	-1.19593	0.231724	0.322496
FvH4_1g04070	14.2252	-8.50204	1.52667	-5.56902	2.56169e-08	1.37931e-07
FvH4_1g04080	650.253	-3.37068	0.795239	-4.23857	2.24949e-05	8.02898e-05
FvH4_1g04090	57.9861	-0.162196	0.338822	-0.478707	0.632147	0.716796
FvH4_1g04091	4.93997	3.22473	1.6629	1.93923	0.0524738	0.0921173
FvH4_1g04100	13.7318	-1.28224	0.803811	-1.5952	0.110668	0.173965
FvH4_1g04110	18.755	-1.44589	0.477038	-3.03098	0.00243764	0.00599417
FvH4_1g04120	288.127	2.03651	0.251275	8.10472	5.28673e-16	6.39668e-15
FvH4_1g04130	32.3735	-3.66824	0.618467	-5.93118	3.00771e-09	1.83748e-08
FvH4_1g04140	12.0383	-5.66245	1.18357	-4.7842	1.71669e-06	7.2164e-06
FvH4_1g04150	201.153	-6.57138	0.869664	-7.55623	4.14923e-14	4.2542e-13
FvH4_1g04160	369.433	-3.75616	0.318459	-11.7948	4.15137e-32	1.64963e-30
FvH4_1g04170	861.199	0.427519	0.397066	1.0767	0.281616	0.37842
FvH4_1g04190	5.58248	-4.10923	1.14975	-3.57402	0.000351542	0.0010202
FvH4_1g04210	403.727	-3.19733	0.676886	-4.72358	2.31724e-06	9.55775e-06
FvH4_1g04220	185.301	0.509951	0.247691	2.05882	0.0395113	0.0720472
FvH4_1g04230	386.437	-1.26877	0.161974	-7.83316	4.75761e-15	5.31124e-14
FvH4_1g04240	1.82922	-5.39698	2.83505	-1.90366	0.0569541	0.0988578
FvH4_1g04250	1051.13	-1.67542	0.553002	-3.02968	0.00244813	0.00601665
FvH4_1g04290	759.302	0.417223	0.664213	0.628146	0.529908	0.626128
FvH4_1g04310	1150.4	1.7291	0.279032	6.19679	5.76249e-10	3.80965e-09
FvH4_1g04320	238.409	0.701203	0.390616	1.79512	0.0726345	0.121703
FvH4_1g04330	182.355	0.521133	0.343532	1.51698	0.129271	0.198262
FvH4_1g04340	78.5272	-0.685275	0.385463	-1.7778	0.0754371	0.125787
FvH4_1g04350	1823.08	1.74978	0.62142	2.81578	0.00486589	0.011218
FvH4_1g04351	18.7063	0.292078	0.630023	0.463599	0.642935	0.726048
FvH4_1g04361	96.3173	0.171212	0.50368	0.339922	0.733915	0.804269
FvH4_1g04370	129.909	-3.06607	0.338847	-9.04853	1.44904e-19	2.44111e-18
FvH4_1g04380	10.2609	-7.63219	1.59471	-4.78595	1.70178e-06	7.16317e-06
FvH4_1g04401	19.2435	-2.37279	0.822567	-2.88462	0.00391891	0.0092366
FvH4_1g04420	612.411	3.87736	0.535308	7.24324	4.38102e-13	4.06481e-12
FvH4_1g04421	4.78579	1.66359	1.01525	1.6386	0.101297	0.161416
FvH4_1g04450	29.6715	-3.1501	0.624809	-5.0417	4.61417e-07	2.10498e-06
FvH4_1g04460	26.054	-1.28899	0.435058	-2.96281	0.00304846	0.00736184
FvH4_1g04490	504.211	0.0181739	0.257956	0.0704533	0.943833	0.965673
FvH4_1g04500	380.545	-0.341922	0.512828	-0.666738	0.504939	0.603458
FvH4_1g04510	177.286	-1.31824	0.3656	-3.60569	0.000311331	0.000912258
FvH4_1g04520	70.1674	-1.24948	0.684086	-1.82649	0.0677765	0.114749
FvH4_1g04540	94.6376	-7.69595	0.646912	-11.8964	1.23517e-32	5.09836e-31
FvH4_1g04541	3.11641	-1.80713	1.38399	-1.30574	0.191643	0.275839
FvH4_1g04560	79.3356	-0.28109	0.58372	-0.48155	0.630126	0.714903
FvH4_1g04570	61.5403	-2.64919	0.512543	-5.16872	2.35699e-07	1.12073e-06
FvH4_1g04610	74.4484	-1.47684	0.517219	-2.85534	0.00429904	0.0100374
FvH4_1g04670	337.969	0.909131	0.180598	5.034	4.8034e-07	2.18596e-06
FvH4_1g04680	235.623	0.417322	0.689128	0.60558	0.544794	0.640234
FvH4_1g04700	672.34	-1.76248	0.56173	-3.1376	0.0017034	0.00432805
FvH4_1g04710	194.092	-0.0658531	0.230783	-0.285347	0.775378	0.839346
FvH4_1g04720	244.474	0.0922529	0.522076	0.176704	0.859741	0.905093
FvH4_1g04721	491.692	0.933908	0.324342	2.87939	0.00398441	0.00937616
FvH4_1g04740	8.43382	-1.97399	1.07624	-1.83415	0.0666319	0.113085
FvH4_1g04750	36.5501	-2.72761	0.415248	-6.56863	5.07795e-11	3.80965e-10
FvH4_1g04760	2.71749	3.0482	2.609	1.16834	0.242669	0.334981
FvH4_1g04770	3.88305	-7.49429	1.97878	-3.78732	0.000152279	0.000473626
FvH4_1g04790	1.30392	-5.00169	1.91435	-2.61274	0.00898194	0.0194487
FvH4_1g04800	12.4774	-4.09595	1.93016	-2.12208	NA	NA
FvH4_1g04810	190.816	-4.27478	0.889907	-4.80362	1.55824e-06	6.60245e-06
FvH4_1g04820	117.614	-1.40304	0.204513	-6.86042	6.86569e-12	5.66787e-11
FvH4_1g04830	250.345	-1.44826	0.366959	-3.94667	7.9247e-05	0.000259009
FvH4_1g04840	8.68464	-3.7764	1.33805	-2.82231	0.00476793	0.0110194
FvH4_1g04841	92.1766	2.26712	0.598423	3.78848	0.00015157	0.000471683
FvH4_1g04850	6.27774	-0.835051	0.737862	-1.13172	0.257753	0.351931
FvH4_1g04860	16.3177	-0.846569	1.38328	-0.612	0.540538	0.636201
FvH4_1g04870	69.7151	2.99303	0.472375	6.33614	2.356e-10	1.62781e-09
FvH4_1g04892	54.131	2.6659	0.782517	3.40683	0.000657216	0.00180896
FvH4_1g04910	4.56637	0.543455	1.03182	0.526696	0.598405	0.68742
FvH4_1g04920	14.509	-1.39588	1.0074	-1.38563	0.165861	0.244572
FvH4_1g04930	209.988	0.31335	0.357228	0.877172	0.380393	0.482244
FvH4_1g04931	3.09725	-0.0285698	1.10017	-0.0259686	0.979282	0.991919
FvH4_1g04940	820.199	1.97056	0.204597	9.63143	5.89065e-22	1.18299e-20
FvH4_1g04950	2878.15	4.43872	0.508611	8.72714	2.61195e-18	3.95543e-17
FvH4_1g04960	331.771	-0.466898	0.224622	-2.0786	0.0376545	0.0691063
FvH4_1g04970	306.902	1.18357	0.310247	3.81492	0.000136228	0.000427026
FvH4_1g04980	62.3195	0.701016	0.511188	1.37135	0.170267	0.250146
FvH4_1g04981	10.719	2.6621	1.02069	2.60813	0.00910379	0.0196973
FvH4_1g04982	154.274	0.342247	0.331235	1.03325	0.301489	0.400197
FvH4_1g04983	25.277	0.204859	0.663814	0.30861	0.757619	0.82459
FvH4_1g04984	48.3833	-1.44764	0.366917	-3.94541	7.96631e-05	0.000260255
FvH4_1g04990	32.4088	-0.619072	0.580908	-1.0657	0.28656	0.384253
FvH4_1g04991	70.1427	-0.552403	0.595613	-0.927452	0.353692	0.455224
FvH4_1g05000	55.8288	1.11182	0.511606	2.1732	0.0297651	0.0562562
FvH4_1g05030	19.8117	-2.04637	1.25031	-1.63669	0.101695	0.161942
FvH4_1g05040	313.738	0.0509917	0.471837	0.108071	0.91394	0.942851
FvH4_1g05050	675.742	1.57135	0.249325	6.30242	2.93027e-10	1.99927e-09
FvH4_1g05070	118.537	-1.3002	0.694873	-1.87113	0.0613274	0.105369
FvH4_1g05080	19.0737	-4.78184	0.861274	-5.55205	2.82337e-08	1.50922e-07
FvH4_1g05090	5.23281	-4.08541	1.57393	-2.59567	0.00944066	0.0203396
FvH4_1g05100	2.26438	-4.93832	2.22769	-2.21679	0.0266373	0.0509995
FvH4_1g05110	550.639	1.92178	0.870877	2.20672	0.0273336	0.0521541
FvH4_1g05120	37.4654	0.171408	0.419448	0.408651	0.682796	0.760846
FvH4_1g05130	34.5601	2.82886	0.64068	4.41539	1.00827e-05	3.80708e-05
FvH4_1g05140	2.01204	3.3247	1.92363	1.72835	0.0839255	0.137673
FvH4_1g05150	285.463	-0.131257	0.525902	-0.249584	0.802909	0.861602
FvH4_1g05170	1358.24	0.346863	0.303289	1.14367	0.25276	0.346237
FvH4_1g05180	4910.12	0.600303	0.930488	0.645149	0.518831	0.616628
FvH4_1g05181	426.043	4.76036	0.484359	9.82818	8.51476e-23	1.80561e-21
FvH4_1g05220	9.33445	-9.05755	2.33652	-3.87651	0.000105968	0.000338431
FvH4_1g05240	902.156	-0.41515	0.325148	-1.2768	0.201672	0.287651
FvH4_1g05260	25.9644	-2.65826	0.984204	-2.70093	0.00691467	0.0154155
FvH4_1g05270	536.73	-0.405287	0.320609	-1.26412	0.206189	0.292824
FvH4_1g05280	629.953	1.0612	0.360434	2.94422	0.00323775	0.00776533
FvH4_1g05300	0.844091	1.01499	2.39388	0.423993	0.671571	0.751257
FvH4_1g05310	205.167	-8.20581	0.552334	-14.8566	6.30165e-50	6.94486e-48
FvH4_1g05320	449.834	-6.15902	0.421475	-14.613	2.32046e-48	2.30726e-46
FvH4_1g05350	827.909	0.235407	0.395441	0.595304	0.551641	0.646412
FvH4_1g05360	93.1703	-0.72265	0.269598	-2.68047	0.00735181	0.0162878
FvH4_1g05370	413.57	3.34502	0.781487	4.28033	1.86616e-05	6.74145e-05
FvH4_1g05371	14.7895	-2.66154	0.841313	-3.16355	0.00155856	0.00398676
FvH4_1g05380	60.8527	-0.320519	0.614844	-0.521301	0.602157	0.690561
FvH4_1g05390	3.13705	-2.01498	1.46278	-1.3775	0.168357	0.247697
FvH4_1g05400	2178.05	4.46111	1.92869	2.31303	0.0207212	0.0408796
FvH4_1g05410	38.5035	-4.07594	0.640846	-6.36025	2.01431e-10	1.40474e-09
FvH4_1g05440	5.61098	-6.65586	1.60803	-4.13914	3.48604e-05	0.000120578
FvH4_1g05450	730.329	-0.569374	0.562335	-1.01252	0.311291	0.410674
FvH4_1g05460	676.708	1.15826	0.189005	6.12818	8.88923e-10	5.76769e-09
FvH4_1g05470	20.4627	-4.7793	0.603582	-7.91823	2.40924e-15	2.7655e-14
FvH4_1g05480	3260.69	0.265009	0.259288	1.02206	0.306751	0.405881
FvH4_1g05520	90.3057	-0.411407	0.484779	-0.848649	0.396076	0.498029
FvH4_1g05530	60.7855	8.02833	1.35374	5.93049	3.02037e-09	1.8437e-08
FvH4_1g05540	96.669	-3.97329	0.619314	-6.41563	1.40245e-10	9.99544e-10
FvH4_1g05550	63.3128	0.532953	0.330418	1.61296	0.106753	0.168711
FvH4_1g05561	1.29248	-1.1084	1.92545	-0.575659	0.564846	0.658369
FvH4_1g05600	28.5047	-0.050459	0.63573	-0.0793717	0.936737	0.960082
FvH4_1g05630	706.155	-3.44058	0.333595	-10.3137	6.11323e-25	1.53873e-23
FvH4_1g05640	172.004	1.33985	0.680002	1.97036	0.0487966	0.0864695
FvH4_1g05650	988.426	-3.60416	0.240982	-14.9562	1.41995e-50	1.62077e-48
FvH4_1g05670	13.4841	-6.60278	2.04697	-3.22564	NA	NA
FvH4_1g05680	907.104	-0.19101	0.247852	-0.770663	0.440907	0.54311
FvH4_1g05690	38.3324	-0.596378	0.428879	-1.39055	0.164361	0.242616
FvH4_1g05700	2.40062	-2.63948	1.47694	-1.78714	0.0739156	0.123581
FvH4_1g05710	123.508	1.54352	0.36122	4.27309	1.92784e-05	6.94742e-05
FvH4_1g05730	671.791	-1.69083	0.376893	-4.48624	7.2491e-06	2.79615e-05
FvH4_1g05740	443.879	-0.0606973	0.206235	-0.294312	0.76852	0.833414
FvH4_1g05750	1.7904	-2.57366	1.33057	-1.93425	0.0530823	0.0930688
FvH4_1g05760	410.002	0.890926	0.261892	3.40189	0.000669222	0.00183929
FvH4_1g05770	78.7572	-9.43186	1.27562	-7.39395	1.42535e-13	1.39249e-12
FvH4_1g05780	126.072	-2.19869	0.346601	-6.34358	2.24483e-10	1.55484e-09
FvH4_1g05790	140.597	-1.99018	0.459679	-4.3295	1.49449e-05	5.47751e-05
FvH4_1g05800	274.454	-0.810471	0.300789	-2.69449	0.0070497	0.015676
FvH4_1g05810	40.3322	-0.874639	0.508918	-1.71863	0.0856826	0.140125
FvH4_1g05820	133.974	-6.22979	0.609908	-10.2143	1.71099e-24	4.14717e-23
FvH4_1g05831	0.713171	-3.38752	3.74712	-0.904033	0.365978	0.467385
FvH4_1g05840	37.2287	0.139679	0.48226	0.289634	0.772096	0.836643
FvH4_1g05850	1258.51	0.82886	0.297723	2.784	0.0053693	0.0122674
FvH4_1g05870	1005.88	0.292305	0.300172	0.97379	0.330161	0.43039
FvH4_1g05880	772.198	0.899681	0.223864	4.01887	5.84769e-05	0.000195173
FvH4_1g05910	132.112	0.889008	0.234235	3.79537	0.000147422	0.000459925
FvH4_1g05950	49.649	-1.3935	0.584583	-2.38375	0.0171374	0.0345995
FvH4_1g05960	157.976	-8.87499	0.908049	-9.77369	1.46031e-22	3.06472e-21
FvH4_1g05970	225.057	-0.31235	0.310117	-1.0072	0.313839	0.413315
FvH4_1g05980	36.8657	-2.86244	0.708879	-4.03798	5.39127e-05	0.000180694
FvH4_1g05990	6.62315	-6.79258	1.73919	-3.90561	9.39889e-05	0.000303073
FvH4_1g06000	4539.95	5.83616	0.42376	13.7723	3.73971e-43	2.69018e-41
FvH4_1g06010	379.869	3.2476	0.440231	7.37702	1.61868e-13	1.57312e-12
FvH4_1g06040	171.355	-0.661399	0.36995	-1.78781	0.0738071	0.123423
FvH4_1g06050	1.07151	-2.77263	3.19397	-0.868082	0.38535	0.487199
FvH4_1g06060	7.82412	-4.34095	1.06943	-4.05913	4.92568e-05	0.000166285
FvH4_1g06070	81.3807	0.11957	0.311103	0.384341	0.700725	0.775802
FvH4_1g06080	6.68836	2.58847	1.26396	2.04791	0.0405688	0.0736572
FvH4_1g06090	394.75	3.59457	0.467	7.69715	1.39139e-14	1.4901e-13
FvH4_1g06100	89.6059	0.782069	0.529181	1.47788	0.139439	0.211479
FvH4_1g06110	259.198	0.713773	0.291566	2.44806	0.0143627	0.0295659
FvH4_1g06140	2.55723	-0.849735	2.2423	-0.378958	0.704719	0.77899
FvH4_1g06150	80.585	-1.41617	0.440446	-3.2153	0.00130306	0.00338035
FvH4_1g06170	356.705	-2.33815	0.643141	-3.63552	0.000277424	0.000819669
FvH4_1g06180	40.3138	-2.57976	0.482946	-5.34171	9.20731e-08	4.61025e-07
FvH4_1g06210	4.85113	-7.8158	1.86722	-4.1858	2.84164e-05	9.97043e-05
FvH4_1g06220	99.6181	-7.11433	0.725456	-9.80669	1.05365e-22	2.22799e-21
FvH4_1g06231	14.3581	-7.45044	1.77691	-4.19291	2.75396e-05	9.68128e-05
FvH4_1g06250	5.81641	-5.70588	1.58799	-3.59315	0.000326704	0.000953931
FvH4_1g06260	23.8484	-3.45993	0.517064	-6.6915	2.209e-11	1.72917e-10
FvH4_1g06261	5.92538	-2.58918	0.79327	-3.26394	0.00109876	0.00288956
FvH4_1g06270	1524.98	1.30356	0.333133	3.91303	9.11453e-05	0.000294498
FvH4_1g06280	45.2019	5.66011	1.14343	4.9501	7.41763e-07	3.28673e-06
FvH4_1g06290	21.0502	-10.2323	4.49753	-2.27509	0.0229004	0.0446706
FvH4_1g06300	33.8458	-5.15734	0.749726	-6.87897	6.02874e-12	5.00278e-11
FvH4_1g06301	2.3095	-4.62388	1.78549	-2.58971	0.0096058	0.0206596
FvH4_1g06302	2.72404	-2.59568	1.59685	-1.62549	0.104058	0.165093
FvH4_1g06330	235.353	-2.58793	0.311902	-8.29727	1.06528e-16	1.37284e-15
FvH4_1g06340	4.44079	-6.44897	2.10553	-3.06288	0.0021922	0.00544085
FvH4_1g06350	5.42044	-6.18758	1.53099	-4.04156	5.30977e-05	0.00017823
FvH4_1g06360	257.005	0.447863	0.401594	1.11521	0.26476	0.359759
FvH4_1g06361	13.4597	-1.59636	0.799018	-1.9979	0.0457277	0.0817566
FvH4_1g06370	18.5224	0.228882	0.511576	0.447405	0.654583	0.736117
FvH4_1g06390	3463.37	0.072912	0.653429	0.111584	0.911154	0.940757
FvH4_1g06400	785.026	0.781087	0.35235	2.21679	0.0266373	0.0509995
FvH4_1g06420	4.62682	-1.04009	0.873629	-1.19054	0.233835	0.324888
FvH4_1g06430	12.4121	0.770988	0.650916	1.18447	0.236229	0.327523
FvH4_1g06440	114.217	-4.82912	0.559329	-8.63377	5.93624e-18	8.6462e-17
FvH4_1g06450	7.96353	3.09495	1.45266	2.13054	0.0331271	0.061796
FvH4_1g06461	4887.96	1.73075	0.51824	3.33967	0.000838767	0.00225757
FvH4_1g06480	482.596	2.53319	0.399779	6.33647	2.35082e-10	1.62473e-09
FvH4_1g06490	85.5578	-4.07987	0.52952	-7.70484	1.31004e-14	1.40567e-13
FvH4_1g06500	260.696	-1.25291	0.285606	-4.38686	1.14998e-05	4.2979e-05
FvH4_1g06510	48.0061	-7.5197	1.02489	-7.33712	2.18247e-13	2.09195e-12
FvH4_1g06520	879.516	0.908938	0.14045	6.47159	9.6977e-11	7.05551e-10
FvH4_1g06530	39.4856	-5.61973	0.872581	-6.44036	1.19194e-10	8.57705e-10
FvH4_1g06540	444.576	2.06844	0.415753	4.97517	6.51889e-07	2.90925e-06
FvH4_1g06560	7.53641	-8.67683	2.319	-3.74163	0.000182832	0.000560548
FvH4_1g06570	246.478	-2.12083	0.239975	-8.83774	9.76737e-19	1.54756e-17
FvH4_1g06580	293.331	1.14348	0.310435	3.68349	0.000230059	0.000691321
FvH4_1g06610	1173.9	2.42662	0.425957	5.69686	1.22037e-08	6.88578e-08
FvH4_1g06620	190.611	-0.862482	0.366333	-2.35437	0.0185543	0.0370755
FvH4_1g06630	92.812	-8.38889	1.4409	-5.82196	5.816e-09	3.4196e-08
FvH4_1g06640	296.693	-5.09306	0.687152	-7.41185	1.24553e-13	1.22646e-12
FvH4_1g06670	1.72314	-6.34287	2.55592	-2.48164	0.0130778	0.0272215
FvH4_1g06690	114.739	-0.282298	0.500843	-0.563644	0.572996	0.665417
FvH4_1g06700	42.8756	2.10929	0.518927	4.06473	4.8089e-05	0.000162608
FvH4_1g06710	121.727	6.01372	0.710666	8.46208	2.62641e-17	3.58938e-16
FvH4_1g06720	2224.64	1.62868	0.18538	8.78566	1.55451e-18	2.41847e-17
FvH4_1g06730	277.094	-0.0814643	0.373365	-0.21819	0.827281	0.88145
FvH4_1g06740	227.085	2.33863	0.716447	3.2642	0.00109774	0.00288722
FvH4_1g06750	1.6337	0.560533	1.55397	0.360709	0.718317	0.7907
FvH4_1g06760	160.863	-1.82895	0.548271	-3.33585	0.000850379	0.0022847
FvH4_1g06761	37.1459	-0.959953	0.560081	-1.71395	0.0865374	0.141284
FvH4_1g06762	38.358	-0.711603	0.354287	-2.00855	0.0445849	0.0799305
FvH4_1g06763	8.50682	-1.78512	0.728175	-2.4515	0.0142261	0.0293036
FvH4_1g06770	0.811784	0.034509	2.26443	0.0152396	0.987841	0.998016
FvH4_1g06780	2503.26	1.24523	0.631276	1.97257	0.0485447	0.0860641
FvH4_1g06790	102.891	-0.894554	0.242185	-3.69368	0.000221035	0.000666261
FvH4_1g06800	37.6446	-0.997476	0.656919	-1.51841	0.12891	0.197763
FvH4_1g06810	214.498	1.27777	0.416856	3.06526	0.00217478	0.00540002
FvH4_1g06820	1450.16	0.61883	0.323445	1.91325	0.0557166	0.0970506
FvH4_1g06830	106.42	-0.00159958	0.322911	-0.00495363	0.996048	1
FvH4_1g06840	1.68883	-0.81159	2.13099	-0.38085	0.703314	0.777937
FvH4_1g06841	536.85	3.31636	0.752266	4.4085	1.0409e-05	3.91312e-05
FvH4_1g06850	141.735	-11.5966	1.49764	-7.74323	9.69238e-15	1.05261e-13
FvH4_1g06851	1.57459	-0.516384	3.0993	-0.166613	0.867675	0.910765
FvH4_1g06860	413.609	2.19	0.558528	3.92103	8.81726e-05	0.000285553
FvH4_1g06870	192.506	-1.68579	0.311715	-5.40811	6.36922e-08	3.24657e-07
FvH4_1g06910	216.261	-1.55076	0.612077	-2.5336	0.0112897	0.0238807
FvH4_1g06920	14.4798	-9.70525	4.8943	-1.98297	0.0473707	0.0842163
FvH4_1g06930	82.6422	0.872205	0.405385	2.15155	0.0314331	0.0589951
FvH4_1g06940	1073.78	1.18264	0.445624	2.6539	0.00795663	0.0174567
FvH4_1g06970	916.272	1.97599	0.406395	4.86223	1.16068e-06	5.02063e-06
FvH4_1g06990	585.803	0.653917	0.370962	1.76276	0.0779411	0.129383
FvH4_1g07000	1061.46	1.71661	0.428046	4.01034	6.06307e-05	0.00020185
FvH4_1g07030	103.057	-1.32649	0.324536	-4.08735	4.36329e-05	0.000148465
FvH4_1g07040	77.6856	-0.733195	0.384098	-1.90888	0.0562781	0.0978209
FvH4_1g07041	14.0564	-1.67005	1.00501	-1.66173	0.0965667	0.154944
FvH4_1g07060	260.014	0.686713	0.192154	3.57376	0.000351891	0.00102108
FvH4_1g07061	1.48161	3.76168	2.43558	1.54447	0.122475	0.18932
FvH4_1g07062	66.7474	4.10066	0.572101	7.16772	7.62582e-13	6.92109e-12
FvH4_1g07063	1.0985	3.20829	3.85196	0.832897	0.404903	0.506938
FvH4_1g07070	5.07495	-1.51068	1.38652	-1.08954	0.275915	0.372302
FvH4_1g07071	33.1531	-3.20017	0.518653	-6.17015	6.82237e-10	4.46973e-09
FvH4_1g07080	42.7185	1.29384	1.07983	1.19819	0.230844	0.321451
FvH4_1g07090	145.137	-0.879275	0.33785	-2.60256	0.00925303	0.0199777
FvH4_1g07100	77.6939	-0.573298	0.420718	-1.36266	0.172989	0.253419
FvH4_1g07110	67.6691	-0.35155	0.286378	-1.22757	0.219608	0.3083
FvH4_1g07120	24.2286	-1.2265	0.436006	-2.81304	0.00490748	0.0112999
FvH4_1g07130	101.772	-0.441337	0.295066	-1.49572	0.134726	0.205389
FvH4_1g07140	370.848	0.496207	0.361619	1.37218	0.170006	0.249795
FvH4_1g07150	74.6148	-4.26721	0.700589	-6.09089	1.12285e-09	7.18754e-09
FvH4_1g07151	217.26	1.56473	0.658867	2.37488	0.0175545	0.0353588
FvH4_1g07160	817.376	4.00824	0.566531	7.07506	1.4938e-12	1.31676e-11
FvH4_1g07170	253.218	-3.22507	0.788353	-4.0909	4.29697e-05	0.000146342
FvH4_1g07180	91.3706	0.548503	0.408413	1.34301	0.179269	0.260904
FvH4_1g07181	34.9087	2.37416	1.60019	1.48367	0.137897	0.20941
FvH4_1g07200	2.49975	0.223062	1.71602	0.129989	0.896575	0.930602
FvH4_1g07210	203.581	0.0953357	0.211546	0.450662	0.652233	0.733882
FvH4_1g07220	91.9709	-4.36469	0.501213	-8.70825	3.08595e-18	4.64282e-17
FvH4_1g07230	160.987	-0.260405	0.619234	-0.420527	0.6741	0.753258
FvH4_1g07231	6.26637	0.975503	0.928817	1.05026	0.293596	0.391695
FvH4_1g07240	152.198	1.0431	0.358781	2.90735	0.00364504	0.0086531
FvH4_1g07250	84.056	0.00298271	0.434942	0.00685771	0.994528	1
FvH4_1g07270	189.375	-3.71577	0.287361	-12.9307	3.02161e-38	1.66501e-36
FvH4_1g07280	350.488	0.235565	0.269541	0.873949	0.382146	0.483972
FvH4_1g07290	710.167	0.571695	0.329357	1.73579	0.0826013	0.135819
FvH4_1g07300	497.965	1.15111	0.603752	1.90659	0.0565743	0.0982977
FvH4_1g07320	60.0621	-1.4637	0.521228	-2.80817	0.00498236	0.01145
FvH4_1g07340	183.916	0.110679	0.499839	0.221429	0.824759	0.879687
FvH4_1g07350	0.507069	0.383522	3.20916	0.119508	0.904873	0.936433
FvH4_1g07370	75.2251	-5.58948	0.393247	-14.2137	7.53699e-46	6.46044e-44
FvH4_1g07380	23.0864	-1.42288	0.753827	-1.88754	0.0590871	0.102014
FvH4_1g07390	165.19	-13.2063	3.43985	-3.83921	0.000123431	0.000389862
FvH4_1g07401	1408.5	-4.37985	0.713751	-6.13639	8.44166e-10	5.48843e-09
FvH4_1g07410	95.6986	-3.7822	0.301527	-12.5435	4.31579e-36	2.08088e-34
FvH4_1g07420	18.3837	0.255743	0.517978	0.493733	0.621495	0.707627
FvH4_1g07430	16.8068	-2.00471	1.17086	-1.71217	0.0868662	0.141655
FvH4_1g07432	7.10659	-2.61454	1.15083	-2.27187	0.0230944	0.0449902
FvH4_1g07450	147.421	-7.9387	0.730686	-10.8647	1.69743e-27	5.08365e-26
FvH4_1g07480	26.9281	-8.20681	1.3033	-6.29692	3.03614e-10	2.06898e-09
FvH4_1g07500	388.005	-0.919865	0.154108	-5.96895	2.38788e-09	1.47778e-08
FvH4_1g07510	487.325	0.161275	0.308088	0.523471	0.600646	0.689252
FvH4_1g07520	256.207	-0.450318	0.195755	-2.30041	0.0214248	0.0421117
FvH4_1g07530	403.876	-2.0535	0.764637	-2.68559	0.00724023	0.0160661
FvH4_1g07540	145.797	1.03316	0.325733	3.1718	0.00151497	0.0038828
FvH4_1g07560	40.4872	-6.9122	0.861318	-8.02515	1.01404e-15	1.20159e-14
FvH4_1g07600	706.536	0.463972	0.400098	1.15964	0.246194	0.338798
FvH4_1g07620	11.2119	-6.93148	1.86445	-3.71772	0.000201031	0.000610737
FvH4_1g07640	101.458	-1.07834	0.293069	-3.67949	0.000233702	0.000701701
FvH4_1g07650	199.187	2.77862	0.473011	5.87432	4.24584e-09	2.53775e-08
FvH4_1g07670	5.5895	-4.7838	1.4361	-3.33111	0.000865009	0.0023201
FvH4_1g07671	91.182	-0.401285	0.813519	-0.49327	0.621822	0.707874
FvH4_1g07680	2.25389	-3.65034	1.87754	-1.94421	0.0518699	0.0912506
FvH4_1g07690	284.622	-0.354128	0.667144	-0.530812	0.595549	0.684773
FvH4_1g07700	114.891	-0.0434221	0.512026	-0.0848045	0.932417	0.956794
FvH4_1g07710	2.02201	-6.30725	2.21799	-2.84368	0.0044596	0.0103733
FvH4_1g07730	60.4116	0.44705	0.40814	1.09534	0.27337	0.369492
FvH4_1g07740	1305.81	1.4366	0.300245	4.78477	1.71184e-06	7.19875e-06
FvH4_1g07750	235.112	0.477468	0.2264	2.10896	0.0349482	0.0647559
FvH4_1g07760	1.66137	4.05173	2.74714	1.47489	0.140242	0.212525
FvH4_1g07770	100.898	-0.294078	0.387507	-0.758896	0.447915	0.549835
FvH4_1g07790	19.6089	-1.7865	0.599891	-2.97804	0.00290097	0.00702994
FvH4_1g07800	38.9729	-0.203266	0.915763	-0.221964	0.824342	0.879371
FvH4_1g07820	67.4177	1.38144	0.74043	1.86572	0.0620799	0.106409
FvH4_1g07830	26.2894	-0.746063	0.824976	-0.904346	0.365812	0.46728
FvH4_1g07860	921.653	-0.0889228	0.124887	-0.712027	0.476448	0.577228
FvH4_1g07870	1.20202	-4.28042	2.59418	-1.65001	0.0989415	0.158278
FvH4_1g07880	7.28841	-2.40476	0.887086	-2.71086	0.00671099	0.0150153
FvH4_1g07900	73.007	-4.45567	0.451496	-9.86868	5.69099e-23	1.2254e-21
FvH4_1g07910	172.622	1.39541	0.370648	3.76478	0.000166693	0.000515375
FvH4_1g07920	714.652	1.78491	0.422143	4.22821	2.3556e-05	8.3783e-05
FvH4_1g07921	153.277	-0.800693	0.241213	-3.31945	0.000901952	0.00241283
FvH4_1g07930	780.396	1.4833	0.330412	4.48926	7.14704e-06	2.75917e-05
FvH4_1g07940	244.108	0.527181	0.395996	1.33128	0.183097	0.265422
FvH4_1g07950	191.602	-4.37006	0.501492	-8.71412	2.93027e-18	4.41751e-17
FvH4_1g07960	732.789	2.21589	0.566265	3.91317	9.10939e-05	0.000294417
FvH4_1g07970	222.746	1.18777	0.289689	4.10016	4.12869e-05	0.000140911
FvH4_1g07980	85.5299	-5.45821	0.517007	-10.5573	4.69926e-26	1.28523e-24
FvH4_1g07981	318.048	-3.0672	0.861169	-3.56167	0.000368509	0.00106584
FvH4_1g07990	130.114	2.63198	0.459245	5.73111	9.97763e-09	5.69147e-08
FvH4_1g08000	415.669	-0.417115	0.383829	-1.08672	0.277161	0.373654
FvH4_1g08010	45.1785	-3.02796	0.414109	-7.31198	2.63238e-13	2.50177e-12
FvH4_1g08020	308.34	-1.4176	0.22871	-6.19825	5.70928e-10	3.77894e-09
FvH4_1g08030	19.416	-1.23371	0.772152	-1.59775	0.110099	0.173192
FvH4_1g08040	33.1048	-2.02806	0.49221	-4.12031	3.78363e-05	0.000129967
FvH4_1g08050	277.806	1.29077	0.275103	4.69197	2.70585e-06	1.10607e-05
FvH4_1g08060	156.242	-0.903382	0.458609	-1.96983	0.0488579	0.0865714
FvH4_1g08061	86.6812	-0.521933	0.315557	-1.65401	0.0981262	0.15712
FvH4_1g08080	41.5119	-4.14602	1.15747	-3.58196	0.000341028	0.000992389
FvH4_1g08090	1572.03	1.76113	0.283422	6.21383	5.17097e-10	3.43687e-09
FvH4_1g08100	192.441	3.33678	0.831093	4.01493	5.94626e-05	0.000198167
FvH4_1g08110	484.065	0.297319	0.639324	0.465053	0.641894	0.725238
FvH4_1g08120	397.902	1.33913	0.284304	4.71022	2.47449e-06	1.01689e-05
FvH4_1g08130	203.854	-0.0234933	0.313002	-0.0750579	0.940169	0.962629
FvH4_1g08140	131.77	-0.965839	0.331465	-2.91385	0.00356999	0.00849116
FvH4_1g08141	684.545	0.620644	0.57664	1.07631	0.281788	0.378628
FvH4_1g08150	478.749	0.897275	0.411977	2.17797	0.029408	0.055667
FvH4_1g08160	161.482	-7.35063	0.946224	-7.76839	7.94906e-15	8.70893e-14
FvH4_1g08180	394.905	-0.998905	0.355696	-2.80831	0.00498029	0.0114464
FvH4_1g08190	49.4097	-4.78388	0.579265	-8.25854	1.47465e-16	1.87555e-15
FvH4_1g08230	7.70401	-7.1094	1.61204	-4.41018	1.03285e-05	3.88613e-05
FvH4_1g08240	1051.42	1.09967	0.214908	5.11692	3.1057e-07	1.45236e-06
FvH4_1g08250	186.401	4.75327	0.608302	7.814	5.54006e-15	6.14792e-14
FvH4_1g08260	162.374	0.472794	0.199734	2.36712	0.017927	0.0360061
FvH4_1g08261	212.515	-2.43619	0.251665	-9.68027	3.65752e-22	7.45907e-21
FvH4_1g08280	156.201	-0.00944674	0.352102	-0.0268296	0.978596	0.991313
FvH4_1g08281	36.651	-0.560821	0.338717	-1.65572	0.0977778	0.156663
FvH4_1g08290	13.1232	0.321859	1.67662	0.191969	0.847766	0.896282
FvH4_1g08300	2859.1	0.283491	0.525283	0.539692	0.58941	0.67932
FvH4_1g08310	80.0428	-7.41176	1.12606	-6.58203	4.64074e-11	3.49218e-10
FvH4_1g08320	157.028	-5.05057	0.482836	-10.4602	1.31533e-25	3.46602e-24
FvH4_1g08340	1.2088	0	5.10037	0	1	1
FvH4_1g08350	303.849	-2.10212	0.62438	-3.36673	0.000760638	0.00206542
FvH4_1g08360	95.669	-3.96813	0.475236	-8.34981	6.83757e-17	8.98767e-16
FvH4_1g08370	54.0138	-0.541811	0.536679	-1.00956	0.312705	0.412077
FvH4_1g08390	8.49308	-3.35925	1.36056	-2.46902	0.0135483	0.0280681
FvH4_1g08400	171.546	1.17991	0.657729	1.79392	0.0728263	0.121979
FvH4_1g08410	2.93493	3.65958	1.96202	1.86521	0.0621518	0.106516
FvH4_1g08420	200.798	0.977227	0.380647	2.56728	0.01025	0.021902
FvH4_1g08430	379.752	0.223356	0.303949	0.734847	0.462433	0.563959
FvH4_1g08440	10.513	-8.03643	1.52187	-5.28063	1.28744e-07	6.32052e-07
FvH4_1g08450	460.128	0.248033	0.318487	0.778787	0.436105	0.53853
FvH4_1g08451	16.8744	-6.80531	1.2299	-5.5332	3.14437e-08	1.67211e-07
FvH4_1g08452	21.2545	-6.83082	1.21614	-5.61678	1.94544e-08	1.06754e-07
FvH4_1g08453	4.66982	4.46036	1.75763	2.53772	0.0111578	0.0236519
FvH4_1g08454	23.8986	0.111402	1.11716	0.0997185	0.920568	0.947885
FvH4_1g08510	717.305	-1.6236	0.412733	-3.93377	8.36235e-05	0.00027208
FvH4_1g08530	0.950047	-2.7565	5.06888	-0.543808	0.586574	0.676598
FvH4_1g08531	901.94	-15.6653	1.26835	-12.3509	4.81681e-35	2.19474e-33
FvH4_1g08540	625.381	-10.9112	1.88869	-5.77709	7.60029e-09	4.4016e-08
FvH4_1g08541	1.87588	-2.89065	1.60475	-1.80131	0.0716537	0.120267
FvH4_1g08550	2.50086	-6.60189	1.77742	-3.71432	0.000203754	0.000618337
FvH4_1g08570	2.71937	-0.373335	1.33624	-0.279391	0.779945	0.843003
FvH4_1g08580	31.5923	-0.922887	0.797048	-1.15788	0.246912	0.339641
FvH4_1g08590	322.763	-0.236993	0.232277	-1.02031	0.307583	0.40667
FvH4_1g08600	172.967	0.359322	0.3537	1.0159	0.309678	0.409029
FvH4_1g08610	24.0282	-1.80347	0.502066	-3.5921	0.000328024	0.000957535
FvH4_1g08620	113.938	-0.246586	0.311936	-0.790502	0.429234	0.531506
FvH4_1g08630	109.364	-0.61444	0.508299	-1.20882	0.226733	0.316713
FvH4_1g08640	106.577	-1.55447	0.389401	-3.99195	6.55319e-05	0.000216913
FvH4_1g08650	182	0.0584958	0.302204	0.193564	0.846517	0.895554
FvH4_1g08660	22.4589	-4.11358	0.840106	-4.8965	9.75601e-07	4.26542e-06
FvH4_1g08670	30.0685	-4.77323	0.69488	-6.86915	6.45851e-12	5.34554e-11
FvH4_1g08690	134.065	0.00720955	0.246871	0.0292037	0.976702	0.989529
FvH4_1g08691	32.7253	0.622681	0.444028	1.40235	0.160812	0.238209
FvH4_1g08700	28.0191	-0.836054	0.536581	-1.55811	0.119207	0.185085
FvH4_1g08701	8.22806	-0.451233	0.801459	-0.563015	0.573425	0.665663
FvH4_1g08730	329.437	0.147217	0.390294	0.377195	0.706029	0.780091
FvH4_1g08750	10.5	0.517398	0.652797	0.792587	0.428019	0.530271
FvH4_1g08760	8649.12	0.652458	0.389042	1.67709	0.0935256	0.150866
FvH4_1g08770	20.1178	-6.29028	0.862638	-7.29192	3.05578e-13	2.88333e-12
FvH4_1g08780	4.15356	-7.90334	4.56952	-1.72958	0.0837054	0.137423
FvH4_1g08790	12.8199	-9.5263	1.89772	-5.01985	5.17111e-07	2.34614e-06
FvH4_1g08840	3041.36	1.33514	0.5041	2.64857	0.00808328	0.0177033
FvH4_1g08850	1.48223	-0.516358	2.54737	-0.202702	0.839368	0.890836
FvH4_1g08870	30.416	8.04393	1.51314	5.31604	1.0605e-07	5.27235e-07
FvH4_1g08880	237.726	0.508276	0.305936	1.66138	0.0966371	0.155002
FvH4_1g08890	5185.84	3.2518	0.185164	17.5617	4.8398e-69	1.289e-66
FvH4_1g08900	28.5127	-5.05211	0.921997	-5.47953	4.26452e-08	2.21926e-07
FvH4_1g08910	62.9966	-3.23678	0.607435	-5.3286	9.8973e-08	4.93585e-07
FvH4_1g08920	55.4565	-0.0291167	0.322306	-0.0903387	0.928018	0.953461
FvH4_1g08930	1.67061	-0.253482	1.57667	-0.16077	0.872274	0.913858
FvH4_1g08940	2396.42	1.43237	0.249448	5.74215	9.34835e-09	5.35497e-08
FvH4_1g08950	199.801	-2.07377	0.238734	-8.68654	3.73648e-18	5.57283e-17
FvH4_1g08960	52.1376	0.000587483	0.482729	0.001217	0.999029	1
FvH4_1g08970	44.7759	-0.145685	0.596756	-0.244128	0.807132	0.864906
FvH4_1g08980	0.91642	-0.516361	3.06683	-0.168369	0.866293	0.909629
FvH4_1g09010	113.447	0.589497	0.395001	1.49239	0.135596	0.206531
FvH4_1g09020	624.669	-0.628945	0.324794	-1.93645	0.0528131	0.0926549
FvH4_1g09021	1.4079	1.4197	2.52411	0.562454	0.573806	0.666037
FvH4_1g09040	196.235	-13.459	1.42695	-9.43199	4.02391e-21	7.57132e-20
FvH4_1g09050	481.378	0.154553	0.327569	0.471818	0.637057	0.720866
FvH4_1g09070	1142.75	-9.86547	0.574894	-17.1605	5.24727e-66	1.23571e-63
FvH4_1g09080	468.069	-1.13624	0.438353	-2.59206	0.0095402	0.0205363
FvH4_1g09090	221.438	-2.77211	0.468048	-5.92271	3.16688e-09	1.9263e-08
FvH4_1g09100	12.0193	4.80882	1.54254	3.11746	0.00182414	0.00460449
FvH4_1g09110	83.4465	-0.508119	0.456868	-1.11218	0.266061	0.361118
FvH4_1g09130	135.892	-0.634638	0.405554	-1.56487	0.117615	0.18302
FvH4_1g09140	211.396	1.53654	0.376482	4.08131	4.47822e-05	0.000152051
FvH4_1g09150	497.874	-1.90763	0.718976	-2.65326	0.00797189	0.0174833
FvH4_1g09160	1273.04	-0.589401	0.504038	-1.16936	0.242259	0.334537
FvH4_1g09180	130.071	-5.51511	0.892088	-6.18225	6.31945e-10	4.15698e-09
FvH4_1g09190	413.714	8.88732	1.15497	7.69486	1.4165e-14	1.51554e-13
FvH4_1g09200	3339.65	3.56934	0.414052	8.62051	6.66586e-18	9.65233e-17
FvH4_1g09210	942.567	0.833855	0.201587	4.13646	3.52704e-05	0.000121883
FvH4_1g09220	489.621	-11.8528	1.15886	-10.228	1.48626e-24	3.62999e-23
FvH4_1g09230	28.1775	-8.50356	1.34086	-6.34189	2.2696e-10	1.57054e-09
FvH4_1g09250	326.43	-9.57394	0.623812	-15.3475	3.6822e-53	4.81744e-51
FvH4_1g09251	21.0503	-2.08716	0.682831	-3.05663	0.00223844	0.00554797
FvH4_1g09260	125.786	2.67259	0.423597	6.30928	2.80336e-10	1.91794e-09
FvH4_1g09270	3.49166	-2.58513	1.2571	-2.05642	0.0397421	0.0724069
FvH4_1g09280	5.62083	-0.748026	0.8975	-0.833456	0.404588	0.506657
FvH4_1g09290	0.80866	1.73203	2.21419	0.782241	0.434073	0.536375
FvH4_1g09300	4440.74	12.354	0.883982	13.9754	2.20333e-44	1.76677e-42
FvH4_1g09310	679.787	0.252203	0.46317	0.544516	0.586087	0.676411
FvH4_1g09330	4.49582	-1.20269	1.33552	-0.900536	0.367835	0.469435
FvH4_1g09360	1976.61	-3.45578	0.624116	-5.53709	3.07539e-08	1.63777e-07
FvH4_1g09380	12.3993	-3.47536	0.868236	-4.00278	6.26028e-05	0.000207982
FvH4_1g09390	760.422	1.50998	0.294286	5.13099	2.88228e-07	1.35382e-06
FvH4_1g09400	1203.3	-0.00861504	0.26301	-0.0327555	0.97387	0.98827
FvH4_1g09440	338.277	-0.291306	0.408901	-0.712411	0.47621	0.577005
FvH4_1g09450	283.9	0.69753	0.312228	2.23404	0.0254803	0.0490235
FvH4_1g09453	3.46222	-7.15101	1.68697	-4.23897	2.24544e-05	8.01834e-05
FvH4_1g09454	39.7236	1.59824	0.564379	2.83186	0.00462782	0.0107289
FvH4_1g09500	71.2254	-8.47249	1.46668	-5.77663	7.62128e-09	4.41147e-08
FvH4_1g09520	6.07155	3.80245	1.82128	2.08779	0.0368166	0.067817
FvH4_1g09530	769.057	-0.772249	0.526108	-1.46785	0.142144	0.214911
FvH4_1g09540	271.484	-0.553341	0.196334	-2.81837	0.00482687	0.0111377
FvH4_1g09550	75.0456	-0.234296	0.283273	-0.827103	0.408179	0.510354
FvH4_1g09560	63.3138	-10.2318	1.898	-5.39083	NA	NA
FvH4_1g09571	50.33	-0.0801369	0.535344	-0.149692	0.881007	0.91969
FvH4_1g09580	134.381	-4.64919	0.700434	-6.63759	3.18844e-11	2.44958e-10
FvH4_1g09610	357.648	-4.15577	1.00555	-4.13282	3.58341e-05	0.000123621
FvH4_1g09620	108.669	4.07983	1.20673	3.38091	0.000722465	0.00197302
FvH4_1g09630	99.9667	-2.2509	0.356981	-6.30537	2.87502e-10	1.96457e-09
FvH4_1g09640	13226.6	9.64356	0.538306	17.9146	9.06631e-72	2.8171e-69
FvH4_1g09650	132.448	-0.276677	0.284918	-0.971079	0.331509	0.431796
FvH4_1g09660	4.9127	-4.46442	1.15939	-3.85067	0.000117797	0.000373914
FvH4_1g09670	809.605	0.328328	0.372741	0.880848	0.3784	0.480207
FvH4_1g09671	84.4581	2.60447	0.421731	6.17567	6.58824e-10	4.32235e-09
FvH4_1g09680	319.776	1.06978	0.185472	5.7679	8.02661e-09	4.6329e-08
FvH4_1g09690	622.062	-0.371024	0.338838	-1.09499	0.273521	0.369675
FvH4_1g09691	12.4014	-0.754934	0.740538	-1.01944	0.307994	0.407068
FvH4_1g09700	35.2353	-1.36618	0.589184	-2.31877	0.0204074	0.0403102
FvH4_1g09701	13.0196	-0.773429	0.650173	-1.18957	0.234214	0.325334
FvH4_1g09716	34.9878	-0.246255	1.28859	-0.191104	0.848444	0.896829
FvH4_1g09717	36.9957	-1.71478	0.362962	-4.72441	2.30787e-06	9.52085e-06
FvH4_1g09720	38.1146	-0.187688	0.663767	-0.282762	0.77736	0.841124
FvH4_1g09730	84.4251	-1.43817	0.420704	-3.41848	0.000629714	0.00174054
FvH4_1g09750	181.763	0.504792	0.303113	1.66536	0.095841	0.154101
FvH4_1g09751	93.2515	0.145124	0.376959	0.384987	0.700247	0.775502
FvH4_1g09760	453.347	0.844595	0.349754	2.41482	0.0157428	0.032101
FvH4_1g09770	10.7448	-7.34093	4.76129	-1.54179	0.123124	0.190072
FvH4_1g09790	206.215	-1.46502	0.51482	-2.84569	0.0044315	0.0103165
FvH4_1g09800	408.343	2.41252	0.290081	8.31673	9.04232e-17	1.1734e-15
FvH4_1g09810	179.938	-0.331694	0.42812	-0.77477	0.438476	0.54095
FvH4_1g09820	10.7421	-8.76709	1.48867	-5.88923	3.88007e-09	2.33221e-08
FvH4_1g09830	673.689	3.8738	0.832045	4.65576	3.22789e-06	1.30587e-05
FvH4_1g09831	449.905	-1.23463	0.429324	-2.87575	0.00403064	0.00947598
FvH4_1g09860	69.8782	-0.893593	0.274427	-3.25621	0.00112909	0.00296167
FvH4_1g09870	520.739	0.70268	0.518947	1.35405	0.175721	0.256758
FvH4_1g09890	22.6589	-0.081799	0.545998	-0.149815	0.88091	0.919649
FvH4_1g09900	27.8562	-10.641	4.89327	-2.17463	0.029658	0.0560796
FvH4_1g09940	444.787	0.32382	0.328101	0.986952	0.323666	0.42345
FvH4_1g09950	0.699932	2.72761	3.41577	0.798535	0.42456	0.526686
FvH4_1g09960	778.769	1.18141	0.28869	4.0923	4.27109e-05	0.000145549
FvH4_1g09970	40.4272	-0.372633	0.451013	-0.826213	0.408683	0.510768
FvH4_1g09980	2925.14	3.66567	0.694823	5.27569	1.32261e-07	6.48322e-07
FvH4_1g09990	536.719	1.71896	0.265621	6.47148	9.7049e-11	7.05846e-10
FvH4_1g10000	258.788	-0.181817	0.30625	-0.593688	0.552721	0.6474
FvH4_1g10010	1212.07	1.41295	0.235758	5.9932	2.05757e-09	1.28116e-08
FvH4_1g10030	54.6612	8.57723	1.46455	5.85658	4.72495e-09	2.80985e-08
FvH4_1g10040	6.00412	0.428428	2.38028	0.179991	0.85716	0.903183
FvH4_1g10070	199.913	0.132038	0.239824	0.550563	0.581933	0.672864
FvH4_1g10130	292.167	0.509504	0.339614	1.50024	0.133552	0.203891
FvH4_1g10140	396.7	-4.03696	0.71968	-5.60938	2.03056e-08	1.11097e-07
FvH4_1g10150	329.12	1.43961	0.323408	4.45136	8.53268e-06	3.25423e-05
FvH4_1g10160	933.815	0.574992	0.383998	1.49738	0.134294	0.20487
FvH4_1g10170	273.716	0.754198	0.409348	1.84244	0.065411	0.111275
FvH4_1g10180	1560.36	3.33684	0.482302	6.91857	4.56236e-12	3.84297e-11
FvH4_1g10190	337.195	0.289096	0.265602	1.08845	0.276395	0.372905
FvH4_1g10191	99.6354	-7.23797	0.620627	-11.6624	1.98486e-31	7.6561e-30
FvH4_1g10192	3.16547	-2.80009	1.32919	-2.10661	0.0351515	0.0650948
FvH4_1g10210	17.713	-3.97057	1.14205	-3.4767	0.000507616	0.00142884
FvH4_1g10220	48.5842	0.587535	0.433474	1.35541	0.175287	0.256208
FvH4_1g10230	99.0561	-0.1384	0.535421	-0.258488	0.79603	0.856233
FvH4_1g10240	342.774	1.12745	0.479094	2.3533	0.0186075	0.0371619
FvH4_1g10250	588.852	-0.010001	0.366947	-0.0272545	0.978257	0.991014
FvH4_1g10260	391.415	0.946687	0.214658	4.41021	1.03271e-05	3.88613e-05
FvH4_1g10270	122.467	-0.269676	0.479796	-0.562064	0.574072	0.66619
FvH4_1g10271	52.3209	0.635436	0.71925	0.88347	0.376982	0.478963
FvH4_1g10280	202.65	-1.55642	0.396737	-3.92305	8.74357e-05	0.000283412
FvH4_1g10290	467.652	1.25881	0.393646	3.19784	0.00138462	0.0035741
FvH4_1g10300	134.096	2.3353	0.439067	5.31878	1.04466e-07	5.19715e-07
FvH4_1g10310	379.165	3.44266	0.580445	5.93106	3.00989e-09	1.83831e-08
FvH4_1g10330	63.805	-1.03741	0.363906	-2.85076	0.00436145	0.0101693
FvH4_1g10340	1968.91	-0.943147	0.325689	-2.89585	0.00378135	0.0089397
FvH4_1g10350	159.262	-0.0175875	0.510352	-0.0344614	0.972509	0.987231
FvH4_1g10370	98.3149	2.24346	0.535361	4.19055	2.78273e-05	9.77628e-05
FvH4_1g10380	8.21165	-2.66536	1.22379	-2.17796	0.0294089	0.055667
FvH4_1g10390	34.358	-2.72883	0.569248	-4.79374	1.63697e-06	6.90724e-06
FvH4_1g10400	14.8533	-3.30056	1.02245	-3.2281	0.00124617	0.00324253
FvH4_1g10430	4.29523	-4.11307	1.38686	-2.96574	0.00301957	0.00729679
FvH4_1g10440	235.173	0.233585	0.304162	0.767961	0.44251	0.544755
FvH4_1g10450	490.635	0.571717	0.258634	2.21052	0.0270689	0.0517418
FvH4_1g10460	25.3404	-3.23034	0.627874	-5.14488	2.67686e-07	1.2621e-06
FvH4_1g10470	223.319	0.0143149	0.456367	0.0313671	0.974977	0.988632
FvH4_1g10471	3.96975	-1.06918	1.32275	-0.808302	0.418917	0.521101
FvH4_1g10480	11.9176	-7.89697	1.75855	-4.49062	7.10171e-06	2.74214e-05
FvH4_1g10490	369.381	0.391665	0.197716	1.98095	0.0475969	0.0845646
FvH4_1g10501	821.386	0.244823	0.266236	0.919574	0.357795	0.459137
FvH4_1g10510	169.835	-0.146992	0.345274	-0.425726	0.670307	0.750519
FvH4_1g10520	4.86341	-7.3596	1.4502	-5.0749	3.87707e-07	1.78878e-06
FvH4_1g10521	373.424	0.025861	0.290255	0.0890975	0.929004	0.954299
FvH4_1g10540	116.737	-1.51216	0.315514	-4.79269	1.64557e-06	6.94093e-06
FvH4_1g10550	13.2375	4.37507	1.67204	2.61662	0.00888064	0.0192519
FvH4_1g10560	123.765	1.4367	0.313341	4.58509	4.53795e-06	1.80037e-05
FvH4_1g10570	27.23	-8.44961	1.12928	-7.48228	7.30449e-14	7.33795e-13
FvH4_1g10572	5.63269	-4.36742	2.12192	-2.05824	0.0395672	0.0721314
FvH4_1g10580	7.16277	-5.9402	1.09211	-5.43917	5.35292e-08	2.753e-07
FvH4_1g10640	28.7144	-10.3415	1.29205	-8.00396	1.20478e-15	1.42159e-14
FvH4_1g10661	183.011	-5.13116	0.484184	-10.5975	3.05922e-26	8.44949e-25
FvH4_1g10670	19.5849	-0.0493463	0.449095	-0.109879	0.912505	0.941675
FvH4_1g10720	15.0075	-0.714526	0.682353	-1.04715	0.295031	0.393187
FvH4_1g10740	78.4316	-3.86959	0.501594	-7.71459	1.21373e-14	1.3086e-13
FvH4_1g10750	1091.05	-0.144567	0.340208	-0.424936	0.670883	0.750874
FvH4_1g10770	184.512	-5.93245	0.698016	-8.49903	1.91185e-17	2.64842e-16
FvH4_1g10780	230.942	1.17973	0.297689	3.96297	7.40219e-05	0.000243174
FvH4_1g10810	233.974	-0.402841	0.204092	-1.97382	0.0484027	0.0858326
FvH4_1g10840	43.7229	-6.32243	0.817028	-7.73834	1.00726e-14	1.09231e-13
FvH4_1g10850	35.5374	5.7612	1.4656	3.93096	8.46091e-05	0.000275127
FvH4_1g10851	24.605	1.37313	0.50891	2.69818	0.00697204	0.0155249
FvH4_1g10860	216.358	-0.434414	0.386271	-1.12464	0.260743	0.355172
FvH4_1g10880	58.71	-0.212939	0.463299	-0.459614	0.645793	0.72843
FvH4_1g10900	35.752	-4.76597	0.586505	-8.12604	4.43532e-16	5.40158e-15
FvH4_1g10910	47.1535	-3.51433	0.852527	-4.12225	3.75193e-05	0.000128997
FvH4_1g10920	145.234	-1.44696	0.303284	-4.77097	1.83338e-06	7.68815e-06
FvH4_1g10930	226.976	-8.84846	0.726098	-12.1863	3.67664e-34	1.61282e-32
FvH4_1g10940	648.264	0.349155	0.259293	1.34657	0.17812	0.259549
FvH4_1g10970	1.33566	1.87021	2.25066	0.830959	0.405997	0.508053
FvH4_1g10980	84.8884	-0.547888	0.314021	-1.74475	0.0810284	0.133685
FvH4_1g10990	138.255	-1.00775	0.245668	-4.10209	4.0943e-05	0.000139929
FvH4_1g10991	282.824	0.116896	0.35816	0.326378	0.744138	0.813085
FvH4_1g11000	575.297	-0.623623	0.227385	-2.74258	0.00609579	0.0137655
FvH4_1g11020	137.462	-6.33671	0.641581	-9.87672	5.25263e-23	1.13538e-21
FvH4_1g11040	0.886034	-0.516386	3.86824	-0.133494	0.893803	0.928542
FvH4_1g11070	1261.97	-0.137503	0.729653	-0.18845	0.850524	0.898349
FvH4_1g11071	42.8805	-0.00621407	0.710909	-0.00874102	0.993026	1
FvH4_1g11080	504.375	0.721241	0.457802	1.57544	0.115154	0.179792
FvH4_1g11100	989.763	2.02047	0.249834	8.08723	6.10349e-16	7.35312e-15
FvH4_1g11110	2715.41	1.24975	0.249572	5.00757	5.51214e-07	2.48975e-06
FvH4_1g11120	283.142	1.52119	0.421314	3.61058	0.000305511	0.000896865
FvH4_1g11140	17.0456	-6.23325	1.2778	-4.87812	1.071e-06	4.65607e-06
FvH4_1g11150	522.061	-0.340821	0.302236	-1.12766	0.259462	0.353836
FvH4_1g11170	142.107	-0.228285	0.596067	-0.382985	0.701731	0.776684
FvH4_1g11181	29.7332	0.815752	0.381508	2.13823	0.0324981	0.0607696
FvH4_1g11190	522.569	0.43396	0.202402	2.14406	0.0320284	0.0599716
FvH4_1g11200	226.766	0.713104	0.40698	1.75219	0.0797419	0.131913
FvH4_1g11210	919.683	0.815207	0.381263	2.13817	0.0325027	0.0607732
FvH4_1g11220	3.54849	-1.26739	1.56482	-0.809924	0.417984	0.520085
FvH4_1g11230	19.4329	-0.350398	0.803233	-0.436235	0.662666	0.743862
FvH4_1g11240	265.789	-2.2148	0.364926	-6.06918	1.28566e-09	8.17356e-09
FvH4_1g11260	716.227	-0.00848334	0.386432	-0.021953	0.982485	0.99414
FvH4_1g11280	0.629657	-3.29391	3.0992	-1.06282	0.287862	0.385609
FvH4_1g11290	107.496	0.472231	0.393478	1.20015	0.230082	0.320595
FvH4_1g11300	3735.35	1.00375	0.56962	1.76214	0.0780454	0.129508
FvH4_1g11310	351.846	-2.83954	0.392896	-7.22719	4.9308e-13	4.5452e-12
FvH4_1g11320	201.538	-0.430739	0.428543	-1.00512	0.314837	0.414252
FvH4_1g11330	37.5368	-11.0749	1.37761	-8.03923	9.04065e-16	1.07698e-14
FvH4_1g11340	44.5402	-11.3259	4.89285	-2.31478	0.0206248	0.0407003
FvH4_1g11341	9.38762	-6.5866	1.54822	-4.25431	2.09694e-05	7.51686e-05
FvH4_1g11342	24.3655	-3.01986	0.603168	-5.00667	5.5381e-07	2.49946e-06
FvH4_1g11350	379.892	-2.71871	0.20982	-12.9574	2.13428e-38	1.1997e-36
FvH4_1g11390	412.729	-14.5331	4.89223	-2.97066	0.00297161	0.00719102
FvH4_1g11391	105.882	-0.475743	0.318298	-1.49464	0.135007	0.205749
FvH4_1g11392	7.26222	-1.74171	1.0585	-1.64545	0.0998773	0.159491
FvH4_1g11400	173.943	-0.0691789	0.302964	-0.228341	0.819381	0.875123
FvH4_1g11410	926.683	0.748579	0.257182	2.91069	0.0036063	0.00856842
FvH4_1g11420	654.758	-0.682843	0.382559	-1.78494	0.0742715	0.124097
FvH4_1g11430	923.457	-1.12786	0.49181	-2.29328	0.0218319	0.0428403
FvH4_1g11470	85.6037	0.175682	0.269217	0.652567	0.514036	0.611702
FvH4_1g11480	30.5865	-6.67761	0.940245	-7.102	1.22967e-12	1.09081e-11
FvH4_1g11490	19.0567	-7.27735	1.1323	-6.42706	1.30096e-10	9.31955e-10
FvH4_1g11500	10.5807	-7.44946	1.54045	-4.83591	1.32539e-06	5.68694e-06
FvH4_1g11510	166.504	0.423212	0.611526	0.692059	0.4889	0.589314
FvH4_1g11520	1487.66	0.668436	0.33299	2.00738	0.0447095	0.0801154
FvH4_1g11530	224.772	-1.5871	0.698059	-2.27358	0.022991	0.0448239
FvH4_1g11540	196.919	-0.579879	0.433899	-1.33644	0.181406	0.263365
FvH4_1g11550	1.17466	-6.00876	4.91982	-1.22134	0.221959	0.311132
FvH4_1g11570	223.094	0.171985	0.359624	0.478235	0.632483	0.717032
FvH4_1g11580	5.63239	-3.5617	1.83604	-1.93988	0.0523943	0.0920283
FvH4_1g11590	3.28311	-0.670969	2.38701	-0.281093	0.778639	0.84193
FvH4_1g11600	163.817	2.06977	0.767171	2.69792	0.00697734	0.0155336
FvH4_1g11610	11.6903	0.234253	0.71689	0.326762	0.743848	0.813017
FvH4_1g11620	889.506	1.20909	0.183958	6.57265	4.9427e-11	3.71192e-10
FvH4_1g11630	173.573	0.67208	0.570463	1.17813	0.238745	0.330602
FvH4_1g11640	508.05	-1.14299	0.570765	-2.00256	0.0452244	0.0809343
FvH4_1g11650	235.325	1.10203	0.502649	2.19245	0.0283472	0.0538676
FvH4_1g11660	83.5466	-0.380467	0.433006	-0.878664	0.379583	0.481517
FvH4_1g11690	255.684	2.06913	0.519424	3.9835	6.79085e-05	0.000224343
FvH4_1g11700	5.53146	-1.04481	0.832668	-1.25477	0.209563	0.29673
FvH4_1g11710	184.247	0.171469	0.396534	0.43242	0.665436	0.746709
FvH4_1g11720	193.047	6.80999	0.996481	6.83403	8.25595e-12	6.77308e-11
FvH4_1g11721	604.953	1.81478	0.533669	3.40057	0.000672461	0.00184683
FvH4_1g11730	2349.48	-6.02744	0.351839	-17.1313	8.6732e-66	2.02122e-63
FvH4_1g11750	144.596	-0.616045	0.480909	-1.281	0.200194	0.28587
FvH4_1g11760	298.84	-3.46652	0.901172	-3.84668	0.000119727	0.000379396
FvH4_1g11761	55.0004	-0.602857	0.469313	-1.28455	0.198948	0.28451
FvH4_1g11770	73.5783	0.0202344	0.321706	0.0628973	0.949848	0.970231
FvH4_1g11780	870.562	-0.212657	0.160552	-1.32453	0.185326	0.26827
FvH4_1g11800	1.48027	-6.30402	3.39614	-1.85623	0.0634203	0.108308
FvH4_1g11810	2675.76	2.39419	0.451273	5.30542	1.12411e-07	5.5577e-07
FvH4_1g11830	26.5942	-10.5754	1.60475	-6.59007	4.39629e-11	3.31381e-10
FvH4_1g11840	7.58892	-7.12929	1.47766	-4.82471	1.40207e-06	5.99179e-06
FvH4_1g11850	21.5066	-5.17065	1.41315	-3.65897	0.000253235	0.000754075
FvH4_1g11860	1580.82	0.583189	0.492304	1.18461	0.236171	0.327483
FvH4_1g11870	76.6474	2.34857	0.548351	4.28297	1.84416e-05	6.66735e-05
FvH4_1g11880	1.10799	0.76467	3.14891	0.242837	0.808132	0.865671
FvH4_1g11900	56.0462	0.714215	0.335677	2.12769	0.0333629	0.0621582
FvH4_1g11910	15.4201	0.894865	1.16801	0.766147	0.443589	0.545663
FvH4_1g11920	412.595	-0.134537	0.147633	-0.911291	0.362142	0.463725
FvH4_1g11930	163.564	-1.30051	0.251714	-5.16662	2.3837e-07	1.13199e-06
FvH4_1g11960	693.288	1.03415	0.21135	4.89307	9.92754e-07	4.33533e-06
FvH4_1g11970	160.824	-0.37932	0.347589	-1.09129	0.275145	0.371516
FvH4_1g11971	4.77705	1.84379	1.59312	1.15734	0.247132	0.339834
FvH4_1g11980	45.6566	7.43081	1.53354	4.84554	1.26269e-06	5.43772e-06
FvH4_1g11990	80.734	2.27345	0.558277	4.07226	4.65588e-05	0.00015782
FvH4_1g12000	92.9869	-0.23375	0.419899	-0.556681	0.577745	0.669284
FvH4_1g12010	446.109	-2.04708	0.579937	-3.52984	0.000415815	0.00119341
FvH4_1g12020	238.53	-0.561491	0.396971	-1.41444	0.157234	0.233761
FvH4_1g12030	970.423	-2.28084	0.664158	-3.43419	0.000594327	0.0016511
FvH4_1g12050	8.20804	-6.84417	1.41031	-4.85296	1.21634e-06	5.25325e-06
FvH4_1g12060	1434.49	1.16819	0.528041	2.21231	0.026945	0.0515225
FvH4_1g12070	326.339	-2.64038	0.917886	-2.87658	0.00402006	0.00945309
FvH4_1g12090	128.311	-1.1776	0.870898	-1.35217	0.17632	0.257482
FvH4_1g12100	45.5243	1.01917	0.406413	2.50772	0.0121514	0.0254971
FvH4_1g12110	318.956	0.114528	0.542915	0.210951	0.832926	0.885741
FvH4_1g12120	857.469	1.14487	0.276016	4.14785	3.35611e-05	0.000116444
FvH4_1g12131	0.826514	0.0997666	2.62863	0.0379539	0.969724	0.985047
FvH4_1g12133	1.03008	1.57169	2.91374	0.539405	0.589607	0.679468
FvH4_1g12150	1.18889	-2.97021	2.10153	-1.41336	0.157551	0.234139
FvH4_1g12151	164.831	-0.0743517	0.299828	-0.247981	0.804149	0.862519
FvH4_1g12160	788.187	1.22252	0.379674	3.21992	0.00128228	0.00332914
FvH4_1g12170	459.844	-0.0712641	0.535585	-0.133058	0.894147	0.928824
FvH4_1g12180	242.321	1.81795	0.236417	7.68958	1.47625e-14	1.57645e-13
FvH4_1g12190	430.895	0.613154	0.227627	2.69368	0.00706684	0.0157063
FvH4_1g12200	169.896	0.647687	0.262279	2.46946	0.0135317	0.0280463
FvH4_1g12210	130.998	-6.7702	0.818515	-8.27132	1.3248e-16	1.68976e-15
FvH4_1g12211	12.5352	-9.39608	1.68557	-5.57441	2.48369e-08	1.33989e-07
FvH4_1g12220	233.677	-5.42346	0.71448	-7.59078	3.17984e-14	3.3088e-13
FvH4_1g12240	8.36537	-8.83562	1.86954	-4.72609	2.28879e-06	9.44912e-06
FvH4_1g12241	69.1914	-6.89489	0.809867	-8.51361	1.68601e-17	2.34428e-16
FvH4_1g12250	151.143	-1.36343	0.499478	-2.72971	0.00633901	0.0142615
FvH4_1g12260	3.13222	-4.00553	1.57575	-2.54198	0.0110226	0.0233942
FvH4_1g12280	442.635	-2.02021	0.650156	-3.10727	0.00188827	0.0047519
FvH4_1g12300	409.025	0.0867726	0.273635	0.317111	0.751159	0.819393
FvH4_1g12310	147.799	0.211193	0.470509	0.44886	0.653533	0.735048
FvH4_1g12320	215.607	-2.03488	0.24876	-8.18011	2.83593e-16	3.51693e-15
FvH4_1g12330	100.85	0.186107	0.357387	0.520742	0.602546	0.690866
FvH4_1g12340	1.80101	-2.84165	1.81873	-1.56244	0.118185	0.183792
FvH4_1g12350	569.603	-2.54724	0.812458	-3.13523	0.00171718	0.00436008
FvH4_1g12360	85.5326	-3.49021	0.599903	-5.81796	5.95714e-09	3.49798e-08
FvH4_1g12370	98.786	-0.595793	0.24046	-2.47772	0.0132226	0.0274844
FvH4_1g12390	1.33059	-4.84557	2.49536	-1.94183	0.0521577	0.0916631
FvH4_1g12391	174.984	-0.727221	0.20681	-3.51637	0.000437495	0.00124842
FvH4_1g12400	692.994	1.42498	0.414481	3.43799	0.000586051	0.00162939
FvH4_1g12410	474.053	2.89265	0.694951	4.16238	3.14948e-05	0.000109854
FvH4_1g12420	429.888	-0.614339	0.489765	-1.25436	0.209713	0.296886
FvH4_1g12450	19.5052	7.98044	1.67046	4.77739	1.77582e-06	7.45939e-06
FvH4_1g12460	88.2368	-0.315442	0.506617	-0.622644	0.533519	0.629529
FvH4_1g12461	9.51678	-1.66277	1.0005	-1.66194	0.0965253	0.1549
FvH4_1g12470	50.7322	-0.0325586	0.399004	-0.0815997	0.934965	0.958706
FvH4_1g12480	271.679	-0.0551531	0.358365	-0.153902	0.877687	0.917509
FvH4_1g12490	13.8054	-8.52385	1.43766	-5.92897	3.04847e-09	1.85933e-08
FvH4_1g12510	85.0772	-0.807758	0.414302	-1.94968	0.0512139	0.0902883
FvH4_1g12520	163.318	-0.448288	0.660996	-0.678201	0.497644	0.596736
FvH4_1g12530	54.6424	0.339464	0.452383	0.750392	0.453019	0.554894
FvH4_1g12531	51.5209	1.26211	0.360195	3.50397	0.000458383	0.00130155
FvH4_1g12540	18.3786	-0.729763	0.592648	-1.23136	0.218188	0.30673
FvH4_1g12550	77.9119	2.82932	2.46676	1.14698	0.25139	0.34472
FvH4_1g12560	708.02	-4.41606	1.00745	-4.3834	1.16843e-05	4.36104e-05
FvH4_1g12580	14.0921	0.99466	0.750497	1.32534	0.18506	0.267937
FvH4_1g12582	531.467	-7.43301	0.890634	-8.34576	7.07602e-17	9.29018e-16
FvH4_1g12600	19.4774	7.15802	1.50597	4.75311	2.00309e-06	8.34666e-06
FvH4_1g12620	150.783	1.57867	0.540642	2.92	0.00350031	0.00834404
FvH4_1g12630	763.599	2.80721	0.316353	8.87367	7.07764e-19	1.13101e-17
FvH4_1g12640	1.34299	-2.76645	3.63284	-0.761511	0.446352	0.548428
FvH4_1g12650	226.759	-0.289407	0.200611	-1.44263	0.149126	0.223584
FvH4_1g12651	1.88241	0.969131	3.47271	0.27907	0.780191	0.843168
FvH4_1g12660	250.529	2.37925	0.47934	4.96359	6.92027e-07	3.07794e-06
FvH4_1g12680	26.8309	1.53448	0.984632	1.55843	0.119131	0.185019
FvH4_1g12690	296.821	6.61857	0.558895	11.8422	2.36044e-32	9.63647e-31
FvH4_1g12700	130.39	1.97576	0.7399	2.6703	0.00757827	0.0167365
FvH4_1g12710	62.2115	-0.0308905	0.493469	-0.0625988	0.950086	0.970372
FvH4_1g12711	1.67335	-2.46851	2.11735	-1.16585	0.243675	0.336008
FvH4_1g12713	0.458067	2.19414	3.81486	0.575157	0.565185	0.658593
FvH4_1g12715	0.62931	-0.323737	2.60804	-0.12413	0.901212	0.933681
FvH4_1g12716	243.182	1.68259	0.368149	4.57041	4.86779e-06	1.92169e-05
FvH4_1g12717	2.1036	-1.17281	1.66661	-0.703709	0.481614	0.582006
FvH4_1g12718	1.74532	-3.44156	1.85527	-1.85502	0.0635931	0.10857
FvH4_1g12719	1.20103	-3.9451	2.86175	-1.37856	0.16803	0.247297
FvH4_1g12720	61.908	4.51841	1.41336	3.19693	0.00138898	0.00358451
FvH4_1g12730	12.6802	0.0793997	1.20332	0.0659839	0.947391	0.968428
FvH4_1g12731	1.50214	1.20122	2.10149	0.571604	0.56759	0.66081
FvH4_1g12740	36.289	-1.33886	0.696454	-1.9224	0.0545555	0.0953752
FvH4_1g12741	56.1686	-2.02448	0.683442	-2.96219	0.00305461	0.00737353
FvH4_1g12742	41.7509	-9.11451	1.41296	-6.45063	1.11385e-10	8.05136e-10
FvH4_1g12750	4.23138	-4.04211	3.9136	-1.03284	0.30168	0.400331
FvH4_1g12751	8.09358	3.34922	1.72491	1.94168	0.0521763	0.0916887
FvH4_1g12752	3.39296	1.51235	1.67495	0.902921	0.366568	0.468112
FvH4_1g12760	305.582	-1.18151	0.329334	-3.58758	0.000333757	0.000973381
FvH4_1g12761	64.9719	-8.43308	1.1285	-7.47283	7.84896e-14	7.85317e-13
FvH4_1g12770	34.1328	-3.495	0.987842	-3.53802	0.000403145	0.00115957
FvH4_1g12780	16.5135	-0.900605	0.928177	-0.970294	0.3319	0.432217
FvH4_1g12781	2.57449	-0.536083	1.84553	-0.290477	0.771452	0.836066
FvH4_1g12790	33.4831	-1.74925	0.358505	-4.87929	1.06471e-06	4.63056e-06
FvH4_1g12800	9.92069	-0.304825	0.741745	-0.410957	0.681104	0.759377
FvH4_1g12820	48.0252	0.782531	0.470336	1.66377	0.0961585	0.154456
FvH4_1g12830	1.05094	-3.6308	3.98386	-0.911377	0.362097	0.463725
FvH4_1g12840	1.32169	-0.395753	1.97404	-0.200479	0.841106	0.891703
FvH4_1g12841	1.785	-5.42394	1.95782	-2.7704	0.00559877	0.0127396
FvH4_1g12850	2.90506	-6.15533	2.37783	-2.58864	0.00963569	0.0207179
FvH4_1g12860	2.64183	-1.22591	1.869	-0.655918	0.511877	0.609755
FvH4_1g12870	5.6809	-3.07146	1.09212	-2.81238	0.00491766	0.011321
FvH4_1g12880	102.607	-3.83283	0.285916	-13.4054	5.6211e-41	3.65568e-39
FvH4_1g12900	398.934	2.21634	0.280414	7.90383	2.70451e-15	3.09332e-14
FvH4_1g12901	184.129	-4.8825	0.811089	-6.01969	1.74753e-09	1.09573e-08
FvH4_1g12950	628.7	1.20555	0.36002	3.34855	0.000812364	0.0021923
FvH4_1g12970	3374.88	2.09759	0.606871	3.4564	0.000547443	0.00153054
FvH4_1g12980	439.547	1.14984	0.461289	2.49266	0.0126789	0.0264923
FvH4_1g12990	48.4306	-0.050764	0.762389	-0.0665855	0.946912	0.96816
FvH4_1g13000	62.5653	-4.60072	0.651135	-7.06569	1.59816e-12	1.40487e-11
FvH4_1g13010	109.85	-0.0491173	0.310478	-0.158199	0.8743	0.914994
FvH4_1g13011	170.392	0.695064	0.472553	1.47087	0.141326	0.213921
FvH4_1g13030	232.109	-3.60268	0.592286	-6.08267	1.182e-09	7.5424e-09
FvH4_1g13050	134.123	1.25128	0.462258	2.70688	0.00679182	0.0151825
FvH4_1g13060	18.0422	-3.63931	0.625644	-5.8169	5.99477e-09	3.51823e-08
FvH4_1g13070	536.968	-0.1864	0.316592	-0.588771	0.556015	0.650176
FvH4_1g13080	441.737	-1.63402	0.514261	-3.17742	0.00148593	0.00381711
FvH4_1g13090	95.2368	-2.34114	0.506698	-4.62039	3.83027e-06	1.53599e-05
FvH4_1g13110	36.644	-5.05823	0.67626	-7.47971	7.44848e-14	7.47924e-13
FvH4_1g13120	227.007	1.40891	0.310616	4.53586	5.73698e-06	2.2458e-05
FvH4_1g13160	1.18453	0.451384	3.06836	0.147109	0.883046	0.921131
FvH4_1g13170	75.188	-6.30224	0.998466	-6.31192	2.75589e-10	1.89009e-09
FvH4_1g13180	265.245	-0.124259	0.3026	-0.410639	0.681337	0.759562
FvH4_1g13190	5.08672	-8.17098	3.03344	-2.69363	0.0070678	0.0157068
FvH4_1g13192	7.18581	3.43628	1.68856	2.03504	0.0418465	0.0756774
FvH4_1g13200	200.059	-8.01461	0.542802	-14.7652	2.4542e-49	2.61454e-47
FvH4_1g13230	5.57156	-6.14189	1.54318	-3.98003	6.8908e-05	0.000227443
FvH4_1g13250	134.184	1.23456	0.311406	3.96448	7.35559e-05	0.000241786
FvH4_1g13260	10.8917	-4.32529	0.762963	-5.66906	1.43583e-08	8.01656e-08
FvH4_1g13270	37.4238	0.985867	0.48068	2.05098	0.0402687	0.0731717
FvH4_1g13290	151.863	1.18758	0.61453	1.9325	0.0532981	0.0934179
FvH4_1g13300	166.15	1.52389	0.460617	3.30837	0.000938396	0.00250045
FvH4_1g13310	16.4614	-0.903319	0.6529	-1.38355	0.166497	0.245396
FvH4_1g13311	370.807	1.40229	0.266597	5.25997	1.44079e-07	7.02864e-07
FvH4_1g13320	221.342	0.135231	0.442665	0.305492	0.759991	0.826649
FvH4_1g13330	568.451	-0.319616	0.450059	-0.710166	0.477601	0.578312
FvH4_1g13340	2.87148	-0.223119	1.39113	-0.160388	0.872576	0.91401
FvH4_1g13350	1714.2	-1.44518	0.436875	-3.30799	0.00093969	0.0025036
FvH4_1g13370	4048.24	0.219938	0.568377	0.386958	0.698787	0.774269
FvH4_1g13380	1087.07	8.10844	0.616221	13.1583	1.52443e-39	9.21744e-38
FvH4_1g13400	559.287	-1.49533	0.736833	-2.0294	0.0424173	0.0765845
FvH4_1g13410	3281.77	2.25647	0.392921	5.74281	9.31179e-09	5.33615e-08
FvH4_1g13420	118.199	-8.46741	1.17085	-7.23183	4.7654e-13	4.40361e-12
FvH4_1g13430	41.5173	0.146582	0.455235	0.321991	0.74746	0.815954
FvH4_1g13440	264.856	-10.3572	0.954987	-10.8453	2.09834e-27	6.23071e-26
FvH4_1g13450	1076.99	-0.0369548	0.228971	-0.161395	0.871782	0.913468
FvH4_1g13460	2.94769	0.380901	2.70885	0.140613	0.888175	0.924542
FvH4_1g13470	324.228	2.39556	0.31626	7.57465	3.60084e-14	3.7192e-13
FvH4_1g13480	2.40953	3.57109	2.04431	1.74684	0.0806646	0.133193
FvH4_1g13490	243.309	1.05421	0.472145	2.23282	0.025561	0.0491408
FvH4_1g13491	4.9726	-2.19638	1.17312	-1.87225	0.0611723	0.105168
FvH4_1g13510	113.015	-12.3963	1.25337	-9.89039	4.58236e-23	9.97242e-22
FvH4_1g13530	262.983	0.649777	0.31911	2.03622	0.0417288	0.0754876
FvH4_1g13540	293.157	0.807864	0.468116	1.72578	0.0843873	0.138339
FvH4_1g13550	17.0342	1.05678	0.900306	1.1738	0.240477	0.332403
FvH4_1g13570	317.368	5.59057	0.389173	14.3652	8.55016e-47	7.87178e-45
FvH4_1g13610	545.07	4.46006	0.404818	11.0174	3.14929e-28	9.88161e-27
FvH4_1g13640	2.46301	-6.50422	2.97752	-2.18444	0.02893	0.0548633
FvH4_1g13650	55.8746	2.60686	0.442675	5.88887	3.88854e-09	2.33667e-08
FvH4_1g13660	126.001	-0.509672	0.255667	-1.9935	0.0462064	0.0824675
FvH4_1g13670	119.038	-0.925107	0.453418	-2.0403	0.0413208	0.0748127
FvH4_1g13680	837.436	0.178146	0.199083	0.894836	0.370875	0.472426
FvH4_1g13700	285.572	0.769273	0.219029	3.5122	0.000444417	0.00126704
FvH4_1g13710	378.49	-2.03939	0.703507	-2.89888	0.00374496	0.00886209
FvH4_1g13720	613.488	-0.393162	0.298479	-1.31722	0.187765	0.271222
FvH4_1g13730	2364.67	7.13151	1.12896	6.3169	2.66858e-10	1.83133e-09
FvH4_1g13740	356.996	2.0913	0.59461	3.5171	0.000436292	0.00124531
FvH4_1g13750	7.46034	3.49896	1.73476	2.01698	0.0436979	0.0786113
FvH4_1g13760	45.9754	2.0126	0.71844	2.80134	0.00508907	0.0116724
FvH4_1g13780	3.51169	-5.09005	1.86512	-2.72907	0.00635127	0.0142876
FvH4_1g13790	1.56321	-6.46701	4.48368	-1.44234	0.149205	0.223653
FvH4_1g13800	1.90283	-4.18728	1.7446	-2.40013	0.0163891	0.0332689
FvH4_1g13810	2.66372	-7.23003	4.009	-1.80345	0.0713176	0.119793
FvH4_1g13820	13.5039	4.13888	1.48846	2.78065	0.00542507	0.0123846
FvH4_1g13850	1.23675	-1.83648	2.32607	-0.78952	0.429808	0.532046
FvH4_1g13870	200.693	0.741071	0.405529	1.82742	0.0676366	0.11453
FvH4_1g13880	407.893	-0.666577	0.379451	-1.75669	0.0789707	0.130811
FvH4_1g13910	0.714066	2.78346	4.33534	0.64204	0.520847	0.618321
FvH4_1g13911	5.55147	0.762363	0.999432	0.762796	0.445585	0.547663
FvH4_1g13912	9.0622	0.957091	1.03681	0.923109	0.35595	0.457405
FvH4_1g13920	3.35909	4.47358	1.78269	2.50945	0.012092	0.0253939
FvH4_1g13930	180.21	3.14235	1.36519	2.30178	0.0213478	0.0419825
FvH4_1g13940	221.954	1.68082	0.554868	3.02923	0.0024518	0.00602501
FvH4_1g13950	515.003	-0.604619	0.290655	-2.08019	0.037508	0.06886
FvH4_1g13960	2624.94	-0.366956	0.431282	-0.850849	0.394853	0.496831
FvH4_1g13970	2003.5	0.348223	0.271755	1.28139	0.200058	0.28575
FvH4_1g13980	2037.3	2.46881	0.323364	7.63476	2.26249e-14	2.3786e-13
FvH4_1g13990	57.069	-2.31866	0.660911	-3.50828	0.000451009	0.00128404
FvH4_1g13991	1.14167	2.36479	2.52083	0.938101	0.348193	0.449911
FvH4_1g14000	53.4318	1.47386	0.566381	2.60225	0.00926144	0.0199939
FvH4_1g14010	1.61394	-0.396904	1.93017	-0.205632	0.837079	0.889068
FvH4_1g14011	147.601	7.44962	1.14615	6.49968	8.04937e-11	5.91009e-10
FvH4_1g14013	30.6974	-8.53607	1.40209	-6.08812	1.14246e-09	7.3026e-09
FvH4_1g14040	728.811	-1.78752	0.321593	-5.55831	2.72395e-08	1.45894e-07
FvH4_1g14050	123.608	-0.254141	0.301931	-0.841719	0.399945	0.501687
FvH4_1g14060	855.194	0.985327	0.612694	1.60819	0.107794	0.17013
FvH4_1g14070	418.201	-3.12453	0.312242	-10.0068	1.4233e-23	3.25251e-22
FvH4_1g14080	217.475	0.47655	0.199731	2.38595	0.0170349	0.0344423
FvH4_1g14090	356.263	0.855508	0.673914	1.26946	0.204277	0.290514
FvH4_1g14100	161.921	0.0613107	0.823474	0.0744537	0.940649	0.963078
FvH4_1g14110	244.355	0.24289	0.213546	1.13742	0.255365	0.349079
FvH4_1g14120	9.55258	-8.04013	1.52652	-5.26695	1.38709e-07	6.78737e-07
FvH4_1g14140	160.73	-9.3252	1.21499	-7.67511	1.65279e-14	1.75826e-13
FvH4_1g14150	39.8687	2.25819	0.700423	3.22404	0.00126395	0.00328536
FvH4_1g14170	110.405	-6.411	0.963312	-6.65517	2.82982e-11	2.18834e-10
FvH4_1g14180	2.35859	-1.45771	1.76288	-0.826893	0.408298	0.510418
FvH4_1g14181	24.0456	-1.264	0.632878	-1.99723	0.0458002	0.08186
FvH4_1g14190	45.3581	0.579792	0.506597	1.14448	0.252423	0.345923
FvH4_1g14220	0.523063	-2.76554	3.71319	-0.744788	0.4564	0.558258
FvH4_1g14230	0.813213	-0.51636	2.82902	-0.182523	0.855172	0.90173
FvH4_1g14240	7.14469	2.94416	1.61046	1.82815	0.0675269	0.114387
FvH4_1g14250	38.4624	-1.67388	0.404039	-4.14286	3.42997e-05	0.000118767
FvH4_1g14251	5.38532	-2.1825	0.965033	-2.26158	0.0237231	0.0460865
FvH4_1g14252	8.64005	-0.74185	0.708517	-1.04705	0.295078	0.393227
FvH4_1g14280	2.43421	-1.05653	1.27784	-0.826809	0.408345	0.51042
FvH4_1g14300	2.25264	-1.83205	1.53429	-1.19407	0.232449	0.323264
FvH4_1g14310	513.555	-0.437745	0.399558	-1.09557	0.273265	0.369373
FvH4_1g14320	344.801	-8.30055	0.639868	-12.9723	1.75737e-38	9.90323e-37
FvH4_1g14330	372.483	-0.803889	0.253794	-3.16748	0.00153764	0.00393593
FvH4_1g14350	357.445	-0.740131	0.31441	-2.35403	0.0185711	0.0371058
FvH4_1g14360	26.3112	-10.1695	1.59313	-6.38335	1.73255e-10	1.22042e-09
FvH4_1g14390	12.1129	-3.05481	0.976758	-3.1275	0.00176302	0.00446584
FvH4_1g14400	111.934	-6.99083	1.07653	-6.49388	8.36514e-11	6.13145e-10
FvH4_1g14410	6.38997	-0.503846	0.792692	-0.635614	0.525028	0.622027
FvH4_1g14420	172.165	0.450242	0.49236	0.914455	0.360478	0.46197
FvH4_1g14430	6650.11	-13.0834	0.603747	-21.6704	3.90605e-104	4.16125e-101
FvH4_1g14460	67.0546	3.84581	1.16801	3.29262	0.00099257	0.00263508
FvH4_1g14470	143.658	-3.91961	0.390024	-10.0497	9.21891e-24	2.13726e-22
FvH4_1g14490	259.694	0.564541	0.22542	2.50439	0.0122662	0.0257164
FvH4_1g14510	208.729	-11.5456	1.22225	-9.44616	3.51484e-21	6.62013e-20
FvH4_1g14520	115.256	-3.68011	0.41975	-8.76737	1.82884e-18	2.82756e-17
FvH4_1g14540	134.15	-1.09885	0.346727	-3.1692	0.00152859	0.0039143
FvH4_1g14550	224.072	0.184985	0.602099	0.307234	0.758665	0.825368
FvH4_1g14560	21.9004	-5.34087	1.31976	-4.04685	5.19121e-05	0.000174696
FvH4_1g14572	63.8868	-1.32094	0.393959	-3.35299	0.000799436	0.00216054
FvH4_1g14580	430.977	-0.126926	0.284526	-0.446096	0.655528	0.737033
FvH4_1g14590	435.636	-0.558142	0.206685	-2.70044	0.00692478	0.0154335
FvH4_1g14600	48.3554	-1.04394	0.551524	-1.89283	0.0583801	0.100957
FvH4_1g14610	100.972	-0.916961	0.260305	-3.52264	0.000427269	0.00122189
FvH4_1g14620	121.883	-3.03752	1.20195	-2.52715	0.0114991	0.0242787
FvH4_1g14630	4.48302	-0.502068	1.8196	-0.275922	0.782608	0.845128
FvH4_1g14640	97.164	-0.510854	0.400359	-1.27599	0.201958	0.287913
FvH4_1g14650	7.83992	2.93516	1.45728	2.01414	0.0439952	0.0790189
FvH4_1g14660	15.5052	-1.41145	1.01088	-1.39626	0.162636	0.240514
FvH4_1g14670	5.63759	-3.86956	1.69212	-2.28681	0.0222066	0.0434614
FvH4_1g14700	1.34952	0.342187	2.16099	0.158347	0.874183	0.914958
FvH4_1g14710	44.3944	-5.04423	0.89337	-5.6463	1.6394e-08	9.09642e-08
FvH4_1g14721	27.7	-0.365542	0.379741	-0.962609	0.335744	0.436527
FvH4_1g14740	27.2448	0.0177614	0.392316	0.0452732	0.96389	0.980515
FvH4_1g14760	226.812	-0.733168	0.302288	-2.42539	0.0152918	0.0312714
FvH4_1g14770	13.079	-7.85892	1.36663	-5.75057	8.89427e-09	5.10604e-08
FvH4_1g14780	8.9654	-3.25751	1.07611	-3.02712	0.00246896	0.00606385
FvH4_1g14790	3.73654	-6.3128	1.71605	-3.67868	0.000234443	0.000703737
FvH4_1g14800	20.8548	-1.5461	0.509571	-3.03412	0.0024124	0.00593797
FvH4_1g14810	119.944	-0.324777	0.591664	-0.548921	0.58306	0.673702
FvH4_1g14820	12.5265	-6.84306	1.23253	-5.55202	2.82388e-08	1.50922e-07
FvH4_1g14840	7.31679	-0.368794	0.927622	-0.397569	0.690948	0.767989
FvH4_1g14850	34.9077	0.352573	0.411929	0.855908	0.392049	0.493913
FvH4_1g14860	40.6814	-7.63551	1.02868	-7.42264	1.14808e-13	1.13299e-12
FvH4_1g14871	1.54719	2.38649	2.70018	0.883826	0.37679	0.478816
FvH4_1g14880	6.36172	-6.20225	1.40628	-4.41041	1.03177e-05	3.88397e-05
FvH4_1g14881	3.18991	-6.87037	1.56801	-4.38158	1.17824e-05	4.39621e-05
FvH4_1g14890	35.7836	-3.10289	0.547387	-5.66855	1.44009e-08	8.03833e-08
FvH4_1g14891	1.06861	-4.33594	3.14717	-1.37773	0.168288	0.247612
FvH4_1g14901	1.43049	-1.90103	2.11125	-0.90043	0.367891	0.469481
FvH4_1g14930	1.36054	-2.7023	2.89644	-0.932972	0.350834	0.452593
FvH4_1g14940	5.22575	-8.07537	1.66411	-4.85267	1.21809e-06	5.25982e-06
FvH4_1g14950	2.11646	-3.51263	2.0156	-1.74272	0.081383	0.134151
FvH4_1g14960	550.416	0.432355	0.81274	0.531971	0.594746	0.684025
FvH4_1g14970	35.0073	-6.37009	1.06538	-5.97919	2.24251e-09	1.39089e-08
FvH4_1g14990	94.2424	-5.05466	0.396889	-12.7357	3.74489e-37	1.94387e-35
FvH4_1g15000	10.621	0.322895	2.6708	0.120898	0.903771	0.935812
FvH4_1g15011	0.743072	-4.31824	3.48301	-1.2398	0.215049	0.30306
FvH4_1g15020	73.4899	-1.71869	0.376968	-4.55925	5.13366e-06	2.02237e-05
FvH4_1g15050	7.58216	-0.786858	0.750881	-1.04791	0.294678	0.392788
FvH4_1g15070	7.18468	-2.08421	1.21491	-1.71553	0.0862488	0.140922
FvH4_1g15080	13.3914	-0.990291	0.540986	-1.83053	0.0671705	0.113852
FvH4_1g15090	41.9305	-6.48449	0.884069	-7.33483	2.22007e-13	2.12617e-12
FvH4_1g15102	15.1737	-0.652925	0.843366	-0.77419	0.438819	0.541247
FvH4_1g15120	200.267	0.655597	0.453052	1.44707	0.147878	0.222036
FvH4_1g15130	342.823	0.208513	0.281422	0.740926	0.458739	0.560385
FvH4_1g15140	2.14148	-4.69601	1.74637	-2.68902	0.00716629	0.0159115
FvH4_1g15150	1.40134	-5.43258	2.01981	-2.68964	0.00715286	0.0158833
FvH4_1g15160	196.99	-1.85449	0.302505	-6.13046	8.76241e-10	5.692e-09
FvH4_1g15170	0.896411	-1.88471	2.48164	-0.759463	0.447576	0.549526
FvH4_1g15171	71.2532	-4.21246	0.423943	-9.93638	2.89147e-23	6.42382e-22
FvH4_1g15180	1.41838	0.464847	2.11298	0.219996	0.825874	0.880403
FvH4_1g15200	35.356	-3.74192	0.442861	-8.44942	2.92765e-17	3.96713e-16
FvH4_1g15210	766.315	2.48295	0.426829	5.81719	5.9845e-09	3.51313e-08
FvH4_1g15220	2139.84	5.48347	0.383811	14.2869	2.64098e-46	2.38242e-44
FvH4_1g15230	2.23173	-3.00723	1.54938	-1.94092	0.0522674	0.0918344
FvH4_1g15240	94.7926	0.169078	0.510967	0.330899	0.740721	0.810352
FvH4_1g15260	30.0337	-10.0662	1.50525	-6.68741	2.2715e-11	1.77314e-10
FvH4_1g15270	3.5098	0.507057	1.87088	0.271026	0.786371	0.848201
FvH4_1g15330	397.668	-0.780857	0.400871	-1.9479	0.0514265	0.0905988
FvH4_1g15350	0.848645	-3.94612	2.8451	-1.38699	0.165445	0.244023
FvH4_1g15351	25.6191	1.57159	0.573932	2.73828	0.00617607	0.013926
FvH4_1g15380	116.758	-2.02512	0.628471	-3.2223	0.00127167	0.00330351
FvH4_1g15390	86.0772	-1.02579	0.476363	-2.15337	0.0312894	0.0587698
FvH4_1g15400	6.95986	0.602647	0.932954	0.645956	0.518308	0.616191
FvH4_1g15410	90.3194	-1.31306	0.259412	-5.06167	4.15611e-07	1.91003e-06
FvH4_1g15420	9.88608	1.59804	0.970715	1.64625	0.0997116	0.159271
FvH4_1g15430	3.80531	-6.55864	1.97498	-3.32087	0.000897385	0.0024009
FvH4_1g15440	720.013	-1.10395	0.47344	-2.33176	0.0197131	0.0390907
FvH4_1g15470	14.2715	-0.522931	1.38062	-0.378766	0.704862	0.779109
FvH4_1g15480	122.018	2.41051	0.589347	4.09014	4.31112e-05	0.000146779
FvH4_1g15500	38.2005	-1.36711	0.63321	-2.15901	0.0308493	0.0580186
FvH4_1g15510	7.31941	-4.75927	1.79204	-2.65578	0.00791256	0.0173753
FvH4_1g15520	210.928	0.0949632	0.226115	0.419977	0.674502	0.753631
FvH4_1g15530	257.239	4.06799	0.64253	6.3312	2.43258e-10	1.67812e-09
FvH4_1g15540	60.6591	0.940689	0.548498	1.71503	0.0863404	0.141034
FvH4_1g15560	112.722	0.197076	0.41963	0.469642	0.63861	0.722258
FvH4_1g15570	1.86247	0.486259	1.37231	0.354335	0.723088	0.794974
FvH4_1g15580	4.41307	-5.68018	1.55036	-3.66379	0.000248509	0.000741878
FvH4_1g15590	48.3732	4.52924	1.44327	3.13817	0.00170005	0.00432102
FvH4_1g15610	191.893	-0.0297179	0.355697	-0.0835482	0.933416	0.957524
FvH4_1g15620	839.519	0.152012	0.226119	0.672266	0.501415	0.600002
FvH4_1g15630	82.9478	0.487635	0.303736	1.60546	0.108393	0.170989
FvH4_1g15670	82.9081	0.679415	0.449115	1.51279	0.130334	0.19966
FvH4_1g15680	91.4031	-6.43451	0.425258	-15.1308	1.01421e-51	1.27471e-49
FvH4_1g15690	905.118	0.0104384	0.536207	0.0194671	0.984469	0.995654
FvH4_1g15700	126.247	-9.95183	1.10052	-9.04283	1.52665e-19	2.56799e-18
FvH4_1g15710	183.78	0.170458	0.371793	0.458475	0.646611	0.729169
FvH4_1g15720	3.61641	-0.812847	2.03713	-0.399015	0.689882	0.767061
FvH4_1g15750	1.2936	0.809723	3.1356	0.258236	0.796225	0.856401
FvH4_1g15770	83.6341	-0.116157	0.323077	-0.359534	0.719196	0.791473
FvH4_1g15790	116.905	0.293091	0.454188	0.645308	0.518728	0.616564
FvH4_1g15810	170.5	-0.961087	0.492886	-1.94992	0.0511861	0.0902604
FvH4_1g15820	253.555	-2.5068	0.352752	-7.10639	1.19115e-12	1.05874e-11
FvH4_1g15830	21.0491	-4.28788	1.66506	-2.5752	0.0100181	0.0214494
FvH4_1g15840	46.7773	-4.51921	0.726124	-6.22375	4.85422e-10	3.23692e-09
FvH4_1g15860	58.1569	5.06612	0.812189	6.23761	4.44295e-10	2.97242e-09
FvH4_1g15870	101.315	-1.49224	0.284995	-5.23603	1.64071e-07	7.96571e-07
FvH4_1g15880	86.123	-0.121536	0.282042	-0.430914	0.666531	0.74745
FvH4_1g15890	40.424	-0.53426	0.490868	-1.0884	0.276419	0.372915
FvH4_1g15900	2.23159	-3.35575	1.5535	-2.16012	0.0307637	0.0579038
FvH4_1g15910	88.4877	1.60731	0.477709	3.36463	0.000766476	0.00207925
FvH4_1g15920	88.3152	1.86004	0.551366	3.37351	0.000742157	0.00202112
FvH4_1g15930	112.33	-0.00978702	0.948959	-0.0103134	0.991771	1
FvH4_1g15940	45.117	7.05421	2.08599	3.3817	0.000720378	0.00196804
FvH4_1g15950	106.174	1.15275	0.256947	4.48632	7.24632e-06	2.79556e-05
FvH4_1g15970	6.30841	-0.33576	0.927606	-0.361964	0.717379	0.789939
FvH4_1g15980	719.491	-0.212184	0.373366	-0.5683	0.569832	0.662902
FvH4_1g15990	3.482	1.99582	1.34451	1.48443	0.137695	0.209174
FvH4_1g16000	1.63437	-0.304415	1.7823	-0.1708	0.864381	0.908354
FvH4_1g16010	103.232	0.0640106	0.664307	0.0963569	0.923237	0.94964
FvH4_1g16020	75.7802	0.491806	0.724392	0.678923	0.497187	0.596379
FvH4_1g16030	250.179	1.08846	0.465331	2.33912	0.0193294	0.0384149
FvH4_1g16050	243.63	-5.96835	0.521964	-11.4344	2.81454e-30	1.00426e-28
FvH4_1g16060	588.783	-0.614495	0.430981	-1.42581	0.153924	0.229513
FvH4_1g16070	29.8619	-4.6002	0.805057	-5.71413	1.10267e-08	6.25797e-08
FvH4_1g16080	403.654	-0.490324	0.443539	-1.10548	0.268951	0.3644
FvH4_1g16081	1.3323	0.80018	1.89478	0.422307	0.672801	0.752257
FvH4_1g16090	30.2461	-8.89088	1.17139	-7.59003	3.19838e-14	3.32655e-13
FvH4_1g16100	388.54	0.537206	0.246798	2.1767	0.0295028	0.055836
FvH4_1g16102	2.19954	-6.98652	4.90625	-1.424	0.154445	0.230165
FvH4_1g16103	42.0202	-9.48035	1.23977	-7.64687	2.05935e-14	2.17217e-13
FvH4_1g16104	30.469	-6.61572	1.11502	-5.93328	2.96944e-09	1.81707e-08
FvH4_1g16130	10.7888	0.158701	0.879983	0.180346	0.856881	0.902974
FvH4_1g16140	194.724	-4.8672	0.378298	-12.8661	6.9885e-38	3.80405e-36
FvH4_1g16150	64.748	-7.41382	0.706194	-10.4983	8.79703e-26	2.34853e-24
FvH4_1g16160	2.02696	0.78046	1.5836	0.492839	0.622126	0.708042
FvH4_1g16170	41.2675	0.544964	0.490223	1.11167	0.266282	0.361397
FvH4_1g16171	9.1819	-7.77773	1.4099	-5.5165	3.4581e-08	1.82915e-07
FvH4_1g16180	12.0759	2.26067	1.93389	1.16898	0.242412	0.334726
FvH4_1g16200	168.356	2.31609	0.590123	3.92477	8.68135e-05	0.000281559
FvH4_1g16210	166.259	-8.78483	0.774933	-11.3362	8.67887e-30	2.9519e-28
FvH4_1g16211	94.5355	-2.24408	0.259037	-8.66316	4.58862e-18	6.77155e-17
FvH4_1g16212	679.993	1.55491	0.437198	3.55653	0.000375783	0.00108492
FvH4_1g16230	543.259	2.60878	0.772254	3.37814	0.000729777	0.0019908
FvH4_1g16240	595.736	1.4732	0.516622	2.8516	0.00434993	0.0101456
FvH4_1g16250	309.774	0.0459199	0.238269	0.192723	0.847176	0.895912
FvH4_1g16260	80.8585	-0.764067	0.304894	-2.50601	0.0122104	0.0256113
FvH4_1g16271	1.18066	-5.77919	4.92456	-1.17354	0.240577	0.332503
FvH4_1g16300	1.04684	-5.42654	4.93345	-1.09995	0.271354	0.367124
FvH4_1g16301	13.2759	-0.0155351	1.56472	-0.00992833	0.992078	1
FvH4_1g16302	18.6164	-1.19379	0.528561	-2.25857	0.02391	0.0463612
FvH4_1g16303	39.7157	0.319199	0.547603	0.582901	0.55996	0.654071
FvH4_1g16304	3.27058	-1.07629	1.26633	-0.849922	0.395368	0.49734
FvH4_1g16320	4.56617	0.474329	0.966747	0.490644	0.623678	0.709351
FvH4_1g16321	31.9368	-9.62388	1.28398	-7.49535	6.61193e-14	6.65717e-13
FvH4_1g16330	153.043	-5.37534	0.538863	-9.97534	1.95437e-23	4.42543e-22
FvH4_1g16340	740.238	1.96891	0.52775	3.73077	0.000190897	0.000582877
FvH4_1g16350	732.789	-1.98827	0.559844	-3.55147	0.000383082	0.00110456
FvH4_1g16360	217.643	1.22123	0.261771	4.66528	3.08198e-06	1.25023e-05
FvH4_1g16370	103.531	-0.0946208	0.417226	-0.226786	0.82059	0.876163
FvH4_1g16380	126.255	-0.752473	0.231211	-3.25449	0.00113598	0.00297694
FvH4_1g16390	1548.43	0.346787	0.267985	1.29406	0.195646	0.280613
FvH4_1g16400	45.2902	-3.08034	0.47211	-6.52461	6.81771e-11	5.05305e-10
FvH4_1g16410	55.2032	-6.55152	0.919093	-7.12825	1.01655e-12	9.11152e-12
FvH4_1g16440	53.4071	-5.03403	0.539955	-9.32306	1.13037e-20	2.0427e-19
FvH4_1g16460	193.282	0.230375	0.683513	0.337046	0.736083	0.806249
FvH4_1g16470	123.689	-1.66736	0.264219	-6.31051	2.78117e-10	1.90393e-09
FvH4_1g16480	221.627	-2.798	0.631734	-4.42908	9.46355e-06	3.58428e-05
FvH4_1g16500	342.016	-0.396603	0.413627	-0.958842	0.337638	0.438503
FvH4_1g16511	8.40986	3.94466	1.40805	2.8015	0.00508651	0.0116683
FvH4_1g16530	7715.48	2.37721	0.440265	5.39949	6.68292e-08	3.39951e-07
FvH4_1g16560	13.7321	-0.971834	0.632801	-1.53577	0.124596	0.192031
FvH4_1g16570	348.051	-0.106041	0.341469	-0.310544	0.756147	0.823431
FvH4_1g16580	224.392	-0.629578	0.609289	-1.0333	0.301464	0.400186
FvH4_1g16590	83.2076	1.42827	0.330692	4.31903	1.56718e-05	5.72893e-05
FvH4_1g16600	20.1227	0.799633	0.63894	1.2515	0.210752	0.29815
FvH4_1g16610	12.7458	-0.937756	1.35662	-0.691245	0.489412	0.589777
FvH4_1g16620	148.777	-1.0881	0.67318	-1.61635	0.106019	0.167681
FvH4_1g16621	12.1292	1.78394	0.836101	2.13365	0.0328717	0.0613605
FvH4_1g16630	112.89	0.0994866	0.486272	0.204591	0.837892	0.889753
FvH4_1g16640	537.445	-0.320463	0.375061	-0.854429	0.392867	0.494749
FvH4_1g16650	41.7952	-1.42476	0.545073	-2.61389	0.00895169	0.0193907
FvH4_1g16660	189.758	0.989919	0.301881	3.27917	0.00104114	0.00275194
FvH4_1g16680	28.7421	-4.75246	0.849561	-5.59402	2.21869e-08	1.20448e-07
FvH4_1g16700	26.0037	-2.83712	0.567365	-5.00051	5.7178e-07	2.57381e-06
FvH4_1g16740	9.0788	-1.19601	0.765889	-1.5616	0.118383	0.184036
FvH4_1g16750	159.694	-1.69391	0.655071	-2.58584	0.00971417	0.0208626
FvH4_1g16760	68.4099	-2.16188	0.54753	-3.94842	7.86695e-05	0.000257234
FvH4_1g16770	566.802	-2.20709	0.441442	-4.99973	5.74093e-07	2.58223e-06
FvH4_1g16780	285.678	-1.20027	0.527689	-2.27458	0.0229313	0.0447153
FvH4_1g16790	6.76828	1.70228	1.96414	0.866682	0.386116	0.487868
FvH4_1g16800	299.677	-0.919272	0.296727	-3.09804	0.00194805	0.00488681
FvH4_1g16840	71.7075	-7.31637	1.39807	-5.23319	1.66614e-07	8.08388e-07
FvH4_1g16841	0.384076	-1.80156	3.93792	-0.457489	0.647319	0.729637
FvH4_1g16860	58.1412	-7.5016	0.940066	-7.97986	1.46498e-15	1.71415e-14
FvH4_1g16861	191.615	-5.77569	0.436035	-13.2459	4.76429e-40	2.99401e-38
FvH4_1g16862	7.56675	-5.99776	1.65494	-3.62416	0.000289903	0.000854169
FvH4_1g16870	27.437	-3.81735	1.08192	-3.52831	0.000418229	0.00119895
FvH4_1g16871	48.7296	-3.0979	0.483949	-6.40129	1.54066e-10	1.09178e-09
FvH4_1g16890	50.7329	1.105	0.461287	2.39547	0.0165992	0.0336465
FvH4_1g16891	9.13951	1.08856	1.19394	0.911731	0.36191	0.463593
FvH4_1g16910	313.05	2.69654	0.406259	6.63749	3.19076e-11	2.45052e-10
FvH4_1g16930	75.0056	1.75402	0.626428	2.80003	0.00510973	0.011715
FvH4_1g16940	518.49	0.100508	0.41359	0.243015	0.807994	0.865564
FvH4_1g16950	15.2803	-1.06052	0.582154	-1.82172	0.0684973	0.115803
FvH4_1g16960	138.773	-0.290832	0.301382	-0.964994	0.334548	0.435247
FvH4_1g16970	27.3209	-5.48412	0.823717	-6.65777	2.78017e-11	2.15144e-10
FvH4_1g16980	6.42435	-1.86545	1.91105	-0.976139	0.328996	0.429122
FvH4_1g16990	57.0233	-1.65697	0.396107	-4.18315	2.87493e-05	0.000100749
FvH4_1g17000	687.922	0.682189	0.415227	1.64293	0.100397	0.160206
FvH4_1g17020	5.45125	-8.16529	1.63551	-4.99252	5.95967e-07	2.67355e-06
FvH4_1g17030	81.6125	-0.0120955	0.306595	-0.039451	0.968531	0.984103
FvH4_1g17040	155.847	0.771568	0.265989	2.90076	0.00372262	0.00881295
FvH4_1g17050	390.389	0.639397	0.195676	3.26762	0.00108455	0.00285454
FvH4_1g17060	240.886	-3.24794	0.272201	-11.9321	8.04999e-33	3.35371e-31
FvH4_1g17080	570.432	-5.87749	1.0407	-5.64763	1.62679e-08	9.0354e-08
FvH4_1g17100	503.602	-0.41864	0.263785	-1.58705	0.112501	0.176326
FvH4_1g17110	553.795	-6.68312	0.271493	-24.6162	8.47226e-134	2.36927e-130
FvH4_1g17120	148.574	-2.54559	0.414426	-6.14243	8.12672e-10	5.28674e-09
FvH4_1g17130	27.585	-7.50447	1.1994	-6.25687	3.92773e-10	2.64354e-09
FvH4_1g17140	356.91	-3.07464	0.420798	-7.30668	2.73814e-13	2.59787e-12
FvH4_1g17150	825.929	-4.96699	0.822928	-6.03575	1.58222e-09	9.98515e-09
FvH4_1g17190	124.428	0.385459	0.347252	1.11003	0.266987	0.362157
FvH4_1g17200	111.283	-4.0252	0.355953	-11.3082	1.19489e-29	4.01986e-28
FvH4_1g17210	10.564	-4.63878	0.833609	-5.5647	2.62607e-08	1.41125e-07
FvH4_1g17220	163.966	-0.54407	0.28396	-1.91601	0.0553638	0.0965845
FvH4_1g17230	393.058	2.07471	0.248063	8.36364	6.08125e-17	8.05028e-16
FvH4_1g17240	3446.66	0.452441	0.581283	0.778349	0.436363	0.53873
FvH4_1g17250	1414.11	0.399706	0.19498	2.04999	0.0403654	0.0733296
FvH4_1g17270	308.31	-3.67528	0.439425	-8.36383	6.07127e-17	8.04183e-16
FvH4_1g17280	477.134	-8.17338	0.505585	-16.1662	8.73172e-59	1.55037e-56
FvH4_1g17290	105.162	-11.3839	1.33247	-8.54343	1.30298e-17	1.82646e-16
FvH4_1g17340	98.4808	-4.95247	0.624179	-7.93438	2.11546e-15	2.43828e-14
FvH4_1g17350	25.3502	-3.18619	0.59994	-5.31084	1.0912e-07	5.41295e-07
FvH4_1g17370	8.08181	-8.86443	4.896	-1.81055	0.070211	0.118191
FvH4_1g17380	961.852	-1.99358	0.342069	-5.82799	5.6098e-09	3.30096e-08
FvH4_1g17390	1950.45	-3.02998	0.416582	-7.27342	3.50491e-13	3.28775e-12
FvH4_1g17400	56.6638	-1.75601	0.321332	-5.46477	4.63502e-08	2.40145e-07
FvH4_1g17410	612.363	0.593979	0.29328	2.0253	0.0428367	0.0772657
FvH4_1g17420	4.02464	-7.85814	4.61921	-1.70119	0.088908	0.14448
FvH4_1g17440	178.884	-3.55193	0.394419	-9.00548	2.14722e-19	3.58222e-18
FvH4_1g17450	80.5018	0.226254	0.744873	0.303749	0.761319	0.827611
FvH4_1g17460	1.84976	-6.73008	4.90898	-1.37097	0.170383	0.250284
FvH4_1g17470	54.7565	-1.65007	0.348968	-4.72842	2.26272e-06	9.35875e-06
FvH4_1g17480	118.477	2.08619	0.405047	5.1505	2.59798e-07	1.22724e-06
FvH4_1g17490	42.7729	-1.48465	0.817698	-1.81565	0.0694241	0.117087
FvH4_1g17500	438.47	0.50819	0.62732	0.810097	0.417885	0.519991
FvH4_1g17510	148.023	-0.567723	0.560449	-1.01298	0.31107	0.410518
FvH4_1g17530	44.5736	-4.21302	0.721113	-5.84239	5.14568e-09	3.04306e-08
FvH4_1g17540	84.0331	0.179697	0.256384	0.70089	0.483371	0.583751
FvH4_1g17550	14.9215	-3.86073	0.7834	-4.92817	8.30026e-07	3.66043e-06
FvH4_1g17560	148.767	2.56478	0.498913	5.14075	2.7365e-07	1.28832e-06
FvH4_1g17570	245.799	-0.445855	0.247264	-1.80316	0.0713634	0.119843
FvH4_1g17580	12.0632	0.396082	0.761891	0.519867	0.603156	0.691388
FvH4_1g17590	486.445	1.01772	0.356195	2.85718	0.00427418	0.00998968
FvH4_1g17610	294.867	2.25073	0.338034	6.65829	2.77024e-11	2.14524e-10
FvH4_1g17620	1095.64	5.17004	0.64961	7.95869	1.73876e-15	2.01761e-14
FvH4_1g17630	1772.68	2.14714	0.351936	6.10092	1.0546e-09	6.77585e-09
FvH4_1g17640	1329	-1.10554	0.488416	-2.26353	0.0236031	0.0458784
FvH4_1g17650	23.7903	-4.66437	0.979282	-4.76305	1.90691e-06	7.97259e-06
FvH4_1g17651	0.822671	-0.516363	3.04771	-0.169426	0.865461	0.909147
FvH4_1g17660	135.579	-0.983176	0.40438	-2.43132	0.015044	0.0308154
FvH4_1g17670	55.369	-0.714319	0.453143	-1.57637	0.114941	0.179509
FvH4_1g17680	245.988	0.608569	0.208068	2.92485	0.00344622	0.00822213
FvH4_1g17690	55.8826	-5.11646	0.752261	-6.80144	1.03577e-11	8.39875e-11
FvH4_1g17710	561.261	1.5033	0.225747	6.65922	2.75284e-11	2.13249e-10
FvH4_1g17720	164.015	0.265495	0.512867	0.517668	0.60469	0.69279
FvH4_1g17740	105.056	-0.206633	0.351682	-0.587557	0.556829	0.650961
FvH4_1g17750	4.93578	-3.84017	1.11639	-3.4398	0.000582145	0.00161947
FvH4_1g17760	575.454	0.101282	0.709845	0.142681	0.886542	0.923486
FvH4_1g17780	109.909	-2.59707	0.483175	-5.37501	7.65801e-08	3.87e-07
FvH4_1g17790	352.748	0.262631	0.19288	1.36163	0.173316	0.253741
FvH4_1g17800	660.543	0.0832193	0.294812	0.282279	0.777729	0.841321
FvH4_1g17810	0.892188	-1.51458	2.55374	-0.593084	0.553125	0.647711
FvH4_1g17820	298.349	-1.10653	0.277191	-3.99195	6.55333e-05	0.000216913
FvH4_1g17821	1.86154	0.329457	2.02333	0.162829	0.870653	0.912501
FvH4_1g17830	6.80223	3.26634	1.61279	2.02527	0.0428394	0.0772657
FvH4_1g17840	1321.19	4.49708	0.230466	19.513	8.51508e-85	4.14129e-82
FvH4_1g17850	515.085	2.98234	0.311581	9.57162	1.05243e-21	2.06174e-20
FvH4_1g17860	18.406	0.26209	0.524985	0.499233	0.617615	0.70446
FvH4_1g17861	6.07517	4.85828	1.6916	2.872	0.00407884	0.00958327
FvH4_1g17880	2.44312	-2.59647	1.2254	-2.11887	0.0341013	0.0633491
FvH4_1g17890	15.7126	0.199767	0.762116	0.262122	0.793228	0.85367
FvH4_1g17891	54.3486	-0.139279	0.765274	-0.181999	0.855583	0.902115
FvH4_1g17910	1286.45	9.18465	1.06191	8.64918	5.18728e-18	7.59489e-17
FvH4_1g17920	543.12	-0.00742631	0.135841	-0.0546691	0.956402	0.974789
FvH4_1g17941	430.314	-5.20405	0.356343	-14.6041	2.64607e-48	2.61937e-46
FvH4_1g17950	23.2123	2.08544	0.658358	3.16764	0.00153684	0.00393434
FvH4_1g17951	5.90114	2.77752	1.25773	2.20836	0.0272191	0.0519667
FvH4_1g17953	11.9793	5.08909	1.49019	3.41507	0.000637652	0.00176118
FvH4_1g17970	204.604	1.82382	0.324005	5.62898	1.81277e-08	9.99071e-08
FvH4_1g17980	49.5765	0.292854	0.468638	0.624904	0.532034	0.627977
FvH4_1g18010	89.8193	-1.07057	0.244456	-4.37939	1.19011e-05	4.43826e-05
FvH4_1g18020	12.61	-4.73853	1.16628	-4.06293	4.846e-05	0.000163694
FvH4_1g18030	52.8253	-1.92444	0.371839	-5.17547	2.27339e-07	1.08467e-06
FvH4_1g18040	0.874187	-4.40954	2.38142	-1.85164	0.0640774	0.109239
FvH4_1g18060	459.04	-0.408167	0.484964	-0.841644	0.399987	0.501711
FvH4_1g18070	1133.32	6.55867	0.560242	11.7069	1.17553e-31	4.5897e-30
FvH4_1g18080	384.783	2.8997	0.304405	9.52579	1.63792e-21	3.15348e-20
FvH4_1g18090	49.447	-1.98334	0.517872	-3.82978	0.000128258	0.000403913
FvH4_1g18100	6.84209	-2.10325	1.14703	-1.83365	0.0667064	0.113203
FvH4_1g18110	2.94103	-4.60206	1.73877	-2.64673	0.00812737	0.0177894
FvH4_1g18111	6.43581	3.94461	1.67375	2.35675	0.0184358	0.0368649
FvH4_1g18121	3.2426	1.78169	1.64628	1.08225	0.27914	0.37586
FvH4_1g18140	7.43198	-0.213466	1.07074	-0.199362	0.841979	0.892188
FvH4_1g18141	0.696866	3.01818	3.3212	0.908762	0.363476	0.464959
FvH4_1g18143	2.32202	0.745678	1.65213	0.451344	0.651741	0.733476
FvH4_1g18160	27.6907	2.43079	1.35856	1.78924	0.0735754	0.123077
FvH4_1g18170	754.902	8.60049	0.899931	9.55683	1.21422e-21	2.36419e-20
FvH4_1g18181	81.2231	6.85306	1.1132	6.15619	7.45156e-10	4.86024e-09
FvH4_1g18210	75.4887	0.536506	0.57654	0.930561	0.352081	0.453756
FvH4_1g18220	10.4177	-6.77709	1.31608	-5.14947	2.61229e-07	1.23348e-06
FvH4_1g18230	95.162	-5.07161	0.302197	-16.7825	3.27976e-63	6.85746e-61
FvH4_1g18250	252.219	-0.165905	0.373696	-0.443958	0.657073	0.738436
FvH4_1g18251	80.4191	-4.27787	0.376872	-11.351	7.3317e-30	2.53125e-28
FvH4_1g18260	34.1193	5.38449	1.80047	2.99061	0.00278425	0.00677646
FvH4_1g18270	58.1499	-0.181617	1.2395	-0.146525	NA	NA
FvH4_1g18280	64.3074	-0.30871	0.787478	-0.392024	0.695041	0.771302
FvH4_1g18300	588.925	0.241658	0.327509	0.737866	0.460596	0.562331
FvH4_1g18320	67.8864	0.992502	0.551529	1.79955	0.0719325	0.120671
FvH4_1g18321	3.63581	0	4.05291	0	1	1
FvH4_1g18350	382.846	0.953621	0.238571	3.99722	6.40916e-05	0.000212518
FvH4_1g18360	776.288	-1.73363	0.355301	-4.87934	1.06442e-06	4.63056e-06
FvH4_1g18370	18.9967	0.138358	0.54109	0.255703	0.79818	0.857899
FvH4_1g18413	38.7477	-1.54334	0.562996	-2.74129	0.00611985	0.0138157
FvH4_1g18420	2.82509	2.67796	1.84444	1.45191	0.146527	0.220331
FvH4_1g18480	73.1064	0.642421	0.438703	1.46437	0.143094	0.216018
FvH4_1g18481	1.19523	0.909831	2.16077	0.421067	0.673706	0.75308
FvH4_1g18482	2.00663	0.335902	1.47159	0.228257	0.819446	0.875151
FvH4_1g18500	2.45738	-7.145	4.90479	-1.45674	0.145188	0.218671
FvH4_1g18510	397.892	-0.562151	0.24373	-2.30645	0.0210858	0.0415256
FvH4_1g18512	698.12	-0.0585379	0.405436	-0.144383	0.885198	0.922645
FvH4_1g18520	516.384	0.060163	0.237713	0.253091	0.800198	0.859517
FvH4_1g18530	179.787	-6.11651	0.690932	-8.85256	8.55356e-19	1.35909e-17
FvH4_1g18540	58.5111	-0.914371	0.68627	-1.33238	0.182736	0.264932
FvH4_1g18550	521.606	-6.0209	0.383442	-15.7022	1.45994e-55	2.08036e-53
FvH4_1g18560	267.866	-0.712852	0.624794	-1.14094	0.253895	0.347507
FvH4_1g18570	0.590235	-1.24303	2.54229	-0.488943	0.624882	0.710476
FvH4_1g18590	4.54658	-6.9292	2.01856	-3.43274	0.000597517	0.00165872
FvH4_1g18591	732.928	-1.24526	0.214686	-5.80039	6.61602e-09	3.86156e-08
FvH4_1g18620	955.131	0.428138	0.424101	1.00952	0.312726	0.412081
FvH4_1g18630	40.3424	-6.50964	1.08208	-6.01588	1.78908e-09	1.12084e-08
FvH4_1g18640	8.53344	0.142647	0.891033	0.160092	0.872808	0.914161
FvH4_1g18650	1.74184	-4.7676	1.83888	-2.59267	0.00952351	0.0205063
FvH4_1g18660	10144	-1.46521	0.685886	-2.13624	0.0326602	0.0610364
FvH4_1g18670	34.7112	-2.82728	0.418997	-6.74772	1.50181e-11	1.19568e-10
FvH4_1g18690	1592.49	1.62848	0.23006	7.07852	1.45702e-12	1.28535e-11
FvH4_1g18710	550.059	-2.59696	0.628254	-4.13361	3.57113e-05	0.000123292
FvH4_1g18740	1.81569	-5.92399	2.56762	-2.30719	0.0210444	0.0414478
FvH4_1g18760	259.047	-2.40434	0.330516	-7.27449	3.4772e-13	3.26445e-12
FvH4_1g18770	196.389	-0.05701	0.359215	-0.158707	0.873899	0.914832
FvH4_1g18801	4.32733	-2.75179	1.05611	-2.60559	0.00917172	0.0198251
FvH4_1g18810	161.169	0.346517	0.366727	0.944892	0.344714	0.446164
FvH4_1g18820	506.211	-0.629714	0.23083	-2.72805	0.00637106	0.0143235
FvH4_1g18830	140.405	0.36679	0.273783	1.33971	0.180341	0.262122
FvH4_1g18831	4.05887	-1.58931	1.33634	-1.1893	0.234321	0.325443
FvH4_1g18840	9.74436	-1.41991	0.728919	-1.94796	0.0514192	0.090593
FvH4_1g18850	339.881	-3.43525	0.405952	-8.46222	2.62342e-17	3.58749e-16
FvH4_1g18870	7.37813	-0.000720622	1.0056	-0.000716608	0.999428	1
FvH4_1g18880	6.98526	-1.27359	1.00834	-1.26306	0.206568	0.293306
FvH4_1g18890	238.956	0.786408	0.292848	2.68538	0.00724477	0.0160714
FvH4_1g18891	380.508	-1.31831	0.875913	-1.50507	0.132305	0.202306
FvH4_1g18900	1947.68	1.52321	0.427058	3.56676	0.000361421	0.00104721
FvH4_1g18910	52.1198	-4.97215	1.09442	-4.54317	5.54137e-06	2.17303e-05
FvH4_1g18920	7.83601	-2.24073	0.840233	-2.66679	0.00765792	0.0168974
FvH4_1g18930	209.595	-7.0465	0.936703	-7.52267	5.36692e-14	5.44776e-13
FvH4_1g18940	1357.94	0.707351	0.339021	2.08645	0.0369376	0.0680194
FvH4_1g18950	101.704	-1.24744	0.750973	-1.6611	0.0966931	0.155058
FvH4_1g18970	1713.6	0.0700836	0.507549	0.138083	0.890175	0.925719
FvH4_1g18980	110.433	-1.51177	0.436424	-3.46399	0.000532224	0.00149191
FvH4_1g18990	120.517	-1.73214	0.314194	-5.51297	3.5282e-08	1.86294e-07
FvH4_1g19010	54.3856	-2.34343	0.327392	-7.15786	8.19479e-13	7.42543e-12
FvH4_1g19030	1.84332	0.982593	1.48624	0.661129	0.50853	0.606764
FvH4_1g19040	139.072	0.00188835	0.365659	0.00516424	0.99588	1
FvH4_1g19050	1380.26	1.19195	0.206982	5.75871	8.47613e-09	4.87852e-08
FvH4_1g19090	1347.57	-5.59311	0.505816	-11.0576	2.01425e-28	6.38284e-27
FvH4_1g19100	10.0648	-9.05015	1.61036	-5.61994	1.91019e-08	1.04922e-07
FvH4_1g19111	1.21371	0.919945	2.82785	0.325316	0.744942	0.81392
FvH4_1g19120	31.6181	4.03884	1.14753	3.5196	0.000432198	0.00123488
FvH4_1g19140	20.3182	0.610952	0.614684	0.993929	0.320258	0.420001
FvH4_1g19141	12.7324	5.39508	1.58912	3.39502	0.000686234	0.00188189
FvH4_1g19142	26.8962	6.34732	1.57082	4.04078	5.32728e-05	0.000178657
FvH4_1g19160	1.54185	-0.0283386	1.91509	-0.0147975	0.988194	0.9982
FvH4_1g19171	9.01037	-6.08868	1.52959	-3.9806	6.87429e-05	0.000226934
FvH4_1g19194	4.92326	-5.56925	1.48731	-3.7445	0.000180751	0.000554777
FvH4_1g19210	5528.68	2.30577	0.556084	4.14645	3.3767e-05	0.000117085
FvH4_1g19240	1064.47	13.839	2.16446	6.39373	1.61883e-10	1.14356e-09
FvH4_1g19261	610.405	3.10334	0.54194	5.72636	1.02609e-08	5.84263e-08
FvH4_1g19262	12.259	4.39209	1.56048	2.81458	0.00488417	0.0112521
FvH4_1g19265	5874.96	14.2408	1.74045	8.18226	2.7858e-16	3.46244e-15
FvH4_1g19280	159.444	10.7554	1.69028	6.3631	1.97716e-10	1.38142e-09
FvH4_1g19281	18190.3	9.07975	0.385017	23.5827	5.80109e-123	1.08152e-119
FvH4_1g19290	90.5144	-0.00911677	0.600619	-0.0151789	0.987889	0.998016
FvH4_1g19310	10.9241	-8.95168	1.878	-4.76661	1.87356e-06	7.84196e-06
FvH4_1g19311	36.5	-5.90527	0.720693	-8.19387	2.52954e-16	3.15269e-15
FvH4_1g19312	1.01439	-3.48668	2.67426	-1.3038	0.192303	0.27667
FvH4_1g19320	141.763	-0.14805	0.59669	-0.248119	0.804042	0.862446
FvH4_1g19321	25.4389	-3.40123	0.625364	-5.4388	5.36417e-08	2.75688e-07
FvH4_1g19330	189.982	-0.42358	0.246979	-1.71504	0.0863374	0.141034
FvH4_1g19340	251.582	3.26397	0.493379	6.61554	3.70188e-11	2.81695e-10
FvH4_1g19380	11.4907	2.96308	1.02528	2.89002	0.00385223	0.00909189
FvH4_1g19381	0.807787	2.91155	2.67108	1.09003	0.275701	0.372081
FvH4_1g19382	2.42681	1.34845	2.41822	0.557621	0.577103	0.668788
FvH4_1g19390	449.815	6.00754	0.605235	9.92595	3.2102e-23	7.10371e-22
FvH4_1g19400	230.307	10.967	1.58414	6.92296	4.42294e-12	3.72974e-11
FvH4_1g19420	0.84799	-5.42654	4.93345	-1.09995	0.271354	0.367124
FvH4_1g19460	13.2422	-5.77159	1.03746	-5.56319	2.64888e-08	1.42283e-07
FvH4_1g19470	67.2479	-0.951033	0.499885	-1.9025	0.0571054	0.0990818
FvH4_1g19471	159.954	0.101025	0.296718	0.340474	0.7335	0.803932
FvH4_1g19480	183.422	1.57167	0.471101	3.33615	0.000849463	0.0022828
FvH4_1g19490	159.627	-1.37809	0.58708	-2.34737	0.0189066	0.0376819
FvH4_1g19500	57.0635	-4.9855	0.815689	-6.11201	9.83817e-10	6.35208e-09
FvH4_1g19520	149.862	0.626777	0.414016	1.51389	0.130053	0.199297
FvH4_1g19530	17.8381	0.586064	1.07745	0.543938	0.586484	0.676598
FvH4_1g19540	16.3179	-9.79062	1.39492	-7.01875	2.23861e-12	1.94418e-11
FvH4_1g19550	128.112	-8.79668	0.975792	-9.01491	1.97031e-19	3.29692e-18
FvH4_1g19561	0.820526	-1.81547	2.95662	-0.614035	0.539192	0.634884
FvH4_1g19562	13.846	2.88038	1.62648	1.77093	0.0765724	0.127461
FvH4_1g19563	67.2217	-0.0113545	0.484412	-0.0234398	0.981299	0.993467
FvH4_1g19570	43.5843	0.775903	0.499771	1.55252	0.120538	0.18688
FvH4_1g19590	215.658	0.929469	0.305525	3.0422	0.00234855	0.00579866
FvH4_1g19600	58.3806	0.215603	0.644642	0.334454	0.738037	0.807994
FvH4_1g19610	197	0.590115	0.438511	1.34572	0.178391	0.259829
FvH4_1g19620	193.126	-1.91141	0.545314	-3.50516	0.00045633	0.00129655
FvH4_1g19623	2.38613	-0.725384	1.45689	-0.497898	0.618556	0.705282
FvH4_1g19630	188.678	0.0918161	0.483125	0.190046	0.849273	0.897451
FvH4_1g19631	2.574	-6.72866	2.38885	-2.81669	0.00485206	0.0111884
FvH4_1g19640	83.2914	-0.425974	0.447918	-0.951008	0.3416	0.442782
FvH4_1g19670	241.294	-0.470439	0.417473	-1.12687	0.259796	0.354241
FvH4_1g19680	708.935	-0.209255	0.324458	-0.644938	0.518967	0.61667
FvH4_1g19690	551.58	-4.51623	0.307752	-14.6749	9.3372e-49	9.49509e-47
FvH4_1g19710	34.9523	-10.9691	1.31356	-8.35071	6.78565e-17	8.93517e-16
FvH4_1g19720	461.654	-1.37138	0.237571	-5.77252	7.8095e-09	4.51458e-08
FvH4_1g19730	523.309	0.283313	0.369899	0.765921	0.443723	0.545768
FvH4_1g19740	125.538	0.437786	0.312586	1.40053	0.161355	0.23895
FvH4_1g19770	0.646059	-2.44653	3.9481	-0.619673	0.535473	0.631436
FvH4_1g19790	20.0806	-3.36746	0.853889	-3.94368	8.02422e-05	0.000262032
FvH4_1g19810	1.25846	-1.77243	1.96872	-0.900293	0.367964	0.469494
FvH4_1g19820	77.6396	-0.513325	0.34649	-1.4815	0.138473	0.210205
FvH4_1g19830	246.887	-0.423322	0.176585	-2.39727	0.0165178	0.0335059
FvH4_1g19840	2699.82	1.27994	0.351426	3.64212	0.000270397	0.000800492
FvH4_1g19860	36.9966	0.944497	0.341455	2.76609	0.00567323	0.0128928
FvH4_1g19880	27.6358	0.745147	0.728344	1.02307	0.306275	0.405371
FvH4_1g19890	325.807	-0.0372835	0.353491	-0.105472	0.916001	0.944585
FvH4_1g19920	993.489	-0.936005	0.409038	-2.28831	0.0221195	0.0433136
FvH4_1g19921	4.61749	1.04503	1.07841	0.969049	0.332521	0.432937
FvH4_1g19960	8.89051	1.35442	1.66272	0.814582	0.415311	0.51742
FvH4_1g19970	133.371	-1.09649	0.406251	-2.69905	0.00695383	0.0154874
FvH4_1g19980	317.587	1.71734	0.252219	6.80891	9.83442e-12	7.99185e-11
FvH4_1g19990	180.329	-0.638022	0.615133	-1.03721	0.299638	0.398496
FvH4_1g20010	252.248	-11.3377	0.934379	-12.1339	6.98468e-34	3.0342e-32
FvH4_1g20030	9.6497	-8.83068	2.0461	-4.31586	1.58984e-05	5.807e-05
FvH4_1g20040	8.17864	-5.84166	1.52552	-3.8293	0.000128507	0.000404467
FvH4_1g20050	319.353	1.69277	0.208633	8.11361	4.91385e-16	5.96812e-15
FvH4_1g20060	1830.06	2.5792	0.469602	5.49231	3.96717e-08	2.07854e-07
FvH4_1g20090	22.6919	-1.52993	0.51586	-2.96579	0.00301911	0.00729649
FvH4_1g20100	154.164	-2.11611	0.582746	-3.63127	0.000282029	0.000831846
FvH4_1g20110	27.3942	-1.50411	0.706715	-2.12832	0.0333109	0.0620872
FvH4_1g20130	23.7889	-2.87623	1.80344	-1.59486	0.110744	0.17406
FvH4_1g20140	296.107	0.830709	0.50782	1.63583	0.101874	0.16217
FvH4_1g20150	61.9668	-0.408063	0.3738	-1.09166	0.274982	0.371357
FvH4_1g20160	45.8301	2.98691	0.618876	4.82634	1.39064e-06	5.94866e-06
FvH4_1g20164	273.864	1.08637	0.220123	4.93529	8.00323e-07	3.53501e-06
FvH4_1g20180	17.0623	2.00272	1.39184	1.4389	0.150178	0.2249
FvH4_1g20190	203.627	1.77207	0.466839	3.79589	0.000147114	0.000459093
FvH4_1g20200	343.694	0.799447	0.256813	3.11295	0.00185227	0.00466864
FvH4_1g20220	195.451	-1.01182	0.207448	-4.87746	1.0746e-06	4.66995e-06
FvH4_1g20221	189.096	0.0205608	0.340415	0.0603992	0.951838	0.971483
FvH4_1g20230	3117.42	-0.392841	0.270481	-1.45238	0.146396	0.220194
FvH4_1g20240	373.428	3.77048	0.379319	9.94012	2.785e-23	6.19961e-22
FvH4_1g20250	345.286	1.07782	0.257364	4.18794	2.81501e-05	9.88346e-05
FvH4_1g20260	505.209	0.199844	0.189419	1.05504	0.291409	0.389287
FvH4_1g20270	5217.02	-2.48828	0.44326	-5.6136	1.98166e-08	1.08554e-07
FvH4_1g20280	12.8557	-0.926783	0.5677	-1.63252	0.102569	0.163057
FvH4_1g20290	71.7871	2.12531	0.698635	3.04209	0.00234944	0.00580022
FvH4_1g20300	2160.05	2.99832	0.476514	6.29219	3.13027e-10	2.13117e-09
FvH4_1g20310	869.132	0.332891	0.24909	1.33643	0.181409	0.263365
FvH4_1g20311	1.22384	-5.89841	2.85409	-2.06665	0.038767	0.07084
FvH4_1g20330	1.10343	-2.19609	2.52494	-0.869758	0.384433	0.486235
FvH4_1g20340	2238.41	0.446706	0.249613	1.78959	0.0735195	0.122992
FvH4_1g20350	3.4524	1.33146	1.33243	0.99927	0.317664	0.417309
FvH4_1g20360	318.554	-2.19736	0.390724	-5.62382	1.86777e-08	1.02693e-07
FvH4_1g20370	438.493	0.542637	0.184603	2.93948	0.00328766	0.00787658
FvH4_1g20380	626.092	0.102282	0.545799	0.187399	0.851348	0.899006
FvH4_1g20390	131.746	-2.6219	0.635018	-4.12887	3.64554e-05	0.000125687
FvH4_1g20400	313.972	1.07305	0.688706	1.55806	0.119218	0.185085
FvH4_1g20410	23.5826	-1.18036	0.577914	-2.04245	0.0411073	0.0744898
FvH4_1g20420	42.512	0.00424752	0.63744	0.00666341	0.994683	1
FvH4_1g20430	28.8386	0.501285	0.501917	0.998741	0.31792	0.417597
FvH4_1g20440	148.115	0.456378	0.240631	1.89659	0.057882	0.100258
FvH4_1g20450	2647.37	-1.49644	0.661982	-2.26054	0.0237877	0.0461776
FvH4_1g20470	7.7316	2.72358	2.19193	1.24254	0.214036	0.301917
FvH4_1g20490	419.404	-0.282626	0.349928	-0.807669	0.419281	0.521439
FvH4_1g20510	54.7453	0.215821	0.413722	0.521657	0.601909	0.690347
FvH4_1g20520	247.79	0.678879	0.255331	2.65882	0.00784144	0.0172479
FvH4_1g20540	0.9021	3.35282	2.56475	1.30727	0.191122	0.275217
FvH4_1g20560	20.7461	-9.01456	1.34815	-6.68663	2.28375e-11	1.78146e-10
FvH4_1g20570	104.17	-9.33616	0.818953	-11.4001	4.17582e-30	1.46429e-28
FvH4_1g20572	11.0211	3.13821	1.85066	1.69572	0.0899382	0.145825
FvH4_1g20573	2.08405	1.30921	2.60957	0.501696	0.615882	0.702949
FvH4_1g20600	8.23515	-5.04914	1.19442	-4.22729	2.36525e-05	8.41128e-05
FvH4_1g20610	34.802	-4.00651	0.503118	-7.96337	1.67417e-15	1.9467e-14
FvH4_1g20620	3.02465	-0.839326	1.09388	-0.767292	0.442908	0.545065
FvH4_1g20630	19.0146	0.308569	0.582448	0.529781	0.596264	0.685489
FvH4_1g20640	555.832	0.508214	0.287201	1.76954	0.0768031	0.127779
FvH4_1g20670	534.478	1.50554	0.357126	4.21571	2.48997e-05	8.82115e-05
FvH4_1g20680	3.99506	-7.65172	2.39395	-3.19628	0.00139213	0.0035921
FvH4_1g20700	322.888	0.618376	0.316214	1.95556	0.0505165	0.0892221
FvH4_1g20710	367.658	-4.87643	0.353238	-13.8049	2.3798e-43	1.7456e-41
FvH4_1g20720	361.374	1.53694	0.18556	8.28272	1.20396e-16	1.54267e-15
FvH4_1g20721	47.9094	0.816069	0.518135	1.57501	0.115254	0.179909
FvH4_1g20730	637.613	0.0728763	0.223233	0.326458	0.744078	0.813085
FvH4_1g20740	155.47	1.45721	0.361825	4.02738	5.64024e-05	0.000188587
FvH4_1g20750	0.834119	-0.957325	1.93245	-0.495394	0.620322	0.706647
FvH4_1g20790	653.551	-0.139544	0.30927	-0.451206	0.651841	0.733551
FvH4_1g20800	180.954	0.519455	0.204374	2.54169	0.0110318	0.0234115
FvH4_1g20810	41.4438	-0.168351	0.529631	-0.317866	0.750587	0.818809
FvH4_1g20820	51.4509	-5.00186	0.424465	-11.7839	4.72486e-32	1.87088e-30
FvH4_1g20821	52.1702	-2.51985	0.539213	-4.67321	2.96533e-06	1.20597e-05
FvH4_1g20830	17.6542	-2.34738	1.07122	-2.19131	0.0284295	0.0540102
FvH4_1g20840	79.8389	0.80947	0.628078	1.28881	0.197466	0.282751
FvH4_1g20860	22.6007	-2.93307	0.630004	-4.65563	3.22987e-06	1.30643e-05
FvH4_1g20880	280.054	0.174443	0.401562	0.434412	0.663989	0.745235
FvH4_1g20890	312.694	1.69714	0.378388	4.48519	7.28473e-06	2.80844e-05
FvH4_1g20891	2.98777	0.30259	1.4411	0.209972	0.833689	0.88637
FvH4_1g20900	8.07641	0.806009	1.15571	0.697415	0.485543	0.586058
FvH4_1g20910	492.804	-0.490232	0.316707	-1.5479	0.121645	0.188336
FvH4_1g20920	144.558	-1.16193	0.418324	-2.77758	0.00547659	0.0124908
FvH4_1g20930	2424.34	-3.60935	0.419091	-8.61231	7.16016e-18	1.03081e-16
FvH4_1g20950	296.692	-0.255984	0.264386	-0.968221	0.332934	0.433374
FvH4_1g20970	47.6699	-0.391143	0.680016	-0.575197	0.565158	0.658593
FvH4_1g21000	4.80518	-6.89882	1.82814	-3.77369	0.00016085	0.000498759
FvH4_1g21001	3.27323	-2.77662	1.36055	-2.0408	0.0412703	0.0747489
FvH4_1g21020	148.32	-7.46963	0.820244	-9.10659	8.50088e-20	1.46294e-18
FvH4_1g21070	217.874	-1.66921	0.378797	-4.40661	1.05001e-05	3.94471e-05
FvH4_1g21100	4.15669	-7.87252	2.46911	-3.18841	0.00143057	0.00368379
FvH4_1g21110	317.867	1.70365	0.54468	3.1278	0.00176121	0.00446176
FvH4_1g21130	115.086	0.439809	0.370555	1.18689	0.235271	0.3266
FvH4_1g21140	10.6606	-1.75797	0.700043	-2.51123	0.0120311	0.0252828
FvH4_1g21150	332.62	-5.15545	0.816896	-6.31103	2.77193e-10	1.89876e-09
FvH4_1g21170	3.59493	-5.73087	1.76951	-3.23867	0.00120088	0.00313527
FvH4_1g21180	1.74423	0	4.40966	0	1	1
FvH4_1g21190	7.82384	0.632783	0.832562	0.760044	0.447229	0.549174
FvH4_1g21200	240.216	-2.38742	0.769607	-3.10213	0.00192131	0.00482853
FvH4_1g21201	0.763272	-0.985024	2.40561	-0.409469	0.682195	0.760328
FvH4_1g21210	429.771	-1.14693	0.406016	-2.82484	0.00473038	0.0109394
FvH4_1g21220	23.625	-0.184508	0.60561	-0.304665	0.760621	0.827082
FvH4_1g21221	0.447493	1.02175	3.24435	0.314932	0.752813	0.820597
FvH4_1g21240	50.5625	0.824353	0.401182	2.05481	0.0398971	0.0726382
FvH4_1g21250	815.843	5.60981	0.362776	15.4636	6.11177e-54	8.18758e-52
FvH4_1g21260	69.8514	-0.796235	0.471686	-1.68806	0.0913993	0.147905
FvH4_1g21290	1.99568	-1.59538	1.74646	-0.913492	0.360984	0.462539
FvH4_1g21310	11.1108	3.32111	1.16162	2.85903	0.00424935	0.00994258
FvH4_1g21340	30.4423	-3.69741	1.20447	-3.06973	0.00214252	0.00532761
FvH4_1g21360	0.984791	-1.44065	2.39334	-0.601941	0.547213	0.642368
FvH4_1g21402	52.9716	1.00876	0.927976	1.08705	0.277013	0.373513
FvH4_1g21410	56.5776	0.204987	0.384567	0.533034	0.59401	0.683495
FvH4_1g21430	408.509	-0.665909	0.266401	-2.49965	0.0124316	0.0260241
FvH4_1g21440	907.451	-0.317976	0.304328	-1.04485	0.296095	0.394346
FvH4_1g21450	5300.37	3.49025	0.810498	4.3063	1.66005e-05	6.04764e-05
FvH4_1g21480	12.1325	-2.26193	1.29308	-1.74925	0.080247	0.132621
FvH4_1g21490	5.56748	-3.13629	1.03628	-3.02649	0.00247409	0.00607512
FvH4_1g21500	564.693	0.227613	0.294369	0.773222	0.439391	0.54172
FvH4_1g21520	1.77959	-1.71287	1.50162	-1.14068	0.254004	0.347573
FvH4_1g21530	209.462	-0.0385278	0.376565	-0.102314	0.918508	0.946472
FvH4_1g21540	15.8211	-5.23103	0.929309	-5.62895	1.81308e-08	9.99071e-08
FvH4_1g21600	31.5127	1.06647	0.743852	1.43372	0.151653	0.226684
FvH4_1g21630	180.467	-9.54887	0.716913	-13.3194	1.78472e-40	1.13754e-38
FvH4_1g21640	40.2622	-2.12854	0.568302	-3.74545	0.000180074	0.000552851
FvH4_1g21650	67.0889	-0.503177	0.361131	-1.39334	0.163517	0.241642
FvH4_1g21660	1148.42	-1.59696	0.549939	-2.90388	0.00368566	0.0087421
FvH4_1g21670	453.709	1.0107	0.299627	3.37319	0.000743028	0.00202325
FvH4_1g21690	89.0783	0.106285	0.337667	0.314764	0.752941	0.820697
FvH4_1g21700	52.5254	0.614742	0.649283	0.946801	0.34374	0.445212
FvH4_1g21730	287.032	0.669791	0.549156	1.21967	0.222588	0.311819
FvH4_1g21740	815.881	-0.440772	0.573429	-0.768661	0.442094	0.544393
FvH4_1g21750	306.514	-0.0494033	0.397263	-0.124359	0.901031	0.933601
FvH4_1g21760	144.643	-0.771239	0.572259	-1.34771	0.177752	0.259159
FvH4_1g21770	47.6856	0.880327	0.904774	0.97298	0.330563	0.430728
FvH4_1g21780	68.0522	-0.71621	0.727646	-0.984284	0.324976	0.424819
FvH4_1g21810	153.062	-1.1814	0.298324	-3.96012	7.49128e-05	0.000245921
FvH4_1g21830	5.91117	-0.794406	1.63332	-0.486374	0.626702	0.712033
FvH4_1g21840	265.959	-0.0326348	0.514256	-0.0634603	0.9494	0.970014
FvH4_1g21870	299.554	-0.79909	0.458251	-1.74378	0.081197	0.133914
FvH4_1g21880	10.1997	3.2623	1.1379	2.86695	0.00414448	0.0097171
FvH4_1g21890	682.939	-3.30391	0.529884	-6.23515	4.5135e-10	3.01781e-09
FvH4_1g21900	208.609	2.5772	0.548204	4.70117	2.58675e-06	1.06029e-05
FvH4_1g21910	180.642	1.58033	0.24382	6.48155	9.07836e-11	6.63295e-10
FvH4_1g21920	875.439	3.56028	0.311305	11.4366	2.7433e-30	9.8337e-29
FvH4_1g21921	1.38384	-4.01554	2.14992	-1.86776	0.061795	0.106026
FvH4_1g21940	32.7065	-2.98801	0.476622	-6.26913	3.63071e-10	2.45471e-09
FvH4_1g21941	2.95914	-3.63985	1.74034	-2.09146	0.0364866	0.0672443
FvH4_1g21950	130.773	-1.98812	0.496309	-4.00582	6.18035e-05	0.00020554
FvH4_1g21970	122.074	0.10131	0.290597	0.348628	0.727369	0.798581
FvH4_1g21980	16.2619	-3.32839	0.682713	-4.87524	1.08677e-06	4.72011e-06
FvH4_1g22020	196.39	9.22754	1.43556	6.42781	1.29454e-10	9.27953e-10
FvH4_1g22042	6.41171	-0.139599	1.00421	-0.139014	0.889439	0.925169
FvH4_1g22043	19.2907	-1.64305	0.512718	-3.2046	0.00135252	0.00349688
FvH4_1g22044	17.9703	-1.77056	0.684589	-2.58631	0.00970087	0.020838
FvH4_1g22060	149.343	-1.61968	0.503788	-3.21499	0.00130449	0.00338365
FvH4_1g22080	882.342	-2.60692	0.298281	-8.73981	2.33495e-18	3.56084e-17
FvH4_1g22090	103.676	0.54989	0.419106	1.31205	0.189502	0.273324
FvH4_1g22100	11.1996	-2.36111	0.810978	-2.91144	0.00359767	0.00855154
FvH4_1g22110	7.48015	0.80199	1.73641	0.461866	0.644178	0.72698
FvH4_1g22140	337.133	1.84104	0.437059	4.21233	2.52752e-05	8.94285e-05
FvH4_1g22150	410.541	1.36647	0.514295	2.65697	0.00788471	0.0173278
FvH4_1g22160	23.108	-0.830873	0.492086	-1.68847	0.0913208	0.147821
FvH4_1g22161	127.741	-0.086997	0.350547	-0.248175	0.803999	0.862441
FvH4_1g22170	104.778	-0.556542	0.264882	-2.1011	0.0356326	0.0658766
FvH4_1g22180	1.31288	-5.51809	3.19961	-1.72461	0.0845972	0.138641
FvH4_1g22200	215.221	1.68891	0.359013	4.70432	2.54712e-06	1.04501e-05
FvH4_1g22210	34.9905	-6.31565	0.883601	-7.14763	8.82909e-13	7.97434e-12
FvH4_1g22220	717.396	3.14419	0.547388	5.74399	9.24694e-09	5.30035e-08
FvH4_1g22221	2.7963	1.83915	1.64176	1.12024	0.262613	0.357245
FvH4_1g22230	447.58	0.221486	0.243145	0.910921	0.362337	0.463874
FvH4_1g22240	569.846	-0.240105	0.396518	-0.605534	0.544824	0.640236
FvH4_1g22250	293.445	-1.10781	0.361647	-3.06324	0.00218951	0.00543539
FvH4_1g22260	64.4703	-8.77505	0.811718	-10.8105	3.07129e-27	9.01718e-26
FvH4_1g22270	49.5106	-0.544489	0.467042	-1.16583	0.243685	0.336008
FvH4_1g22290	121.517	-0.00939752	0.438376	-0.0214371	0.982897	0.994499
FvH4_1g22291	197.282	0.403079	0.597234	0.67491	0.499733	0.598726
FvH4_1g22320	23.9007	-5.36526	0.694118	-7.72961	1.07874e-14	1.167e-13
FvH4_1g22350	48.7308	-0.191743	0.73468	-0.260988	0.794102	0.854488
FvH4_1g22390	15.2758	6.5962	1.51196	4.36269	1.28472e-05	4.75069e-05
FvH4_1g22400	5.98119	-0.810966	0.869065	-0.933148	0.350744	0.452528
FvH4_1g22401	5.89291	0.376382	1.62835	0.231144	0.817203	0.87352
FvH4_1g22410	50.09	-0.248965	0.433299	-0.574581	0.565575	0.658874
FvH4_1g22430	28.9267	-1.08954	0.66118	-1.64787	0.099379	0.15883
FvH4_1g22440	1397.02	0.907723	0.486187	1.86702	0.0618984	0.106163
FvH4_1g22450	215.633	0.0269039	0.434135	0.0619713	0.950586	0.97063
FvH4_1g22460	44.6144	0.216065	0.519135	0.416201	0.677263	0.756037
FvH4_1g22461	10.1058	-1.84968	0.735241	-2.51575	0.0118779	0.0249913
FvH4_1g22470	145.643	-0.612556	0.492591	-1.24354	0.213669	0.301476
FvH4_1g22471	20.4328	0.219309	0.713177	0.307509	0.758456	0.82518
FvH4_1g22472	20.9745	0.606667	0.95264	0.636828	0.524237	0.621366
FvH4_1g22490	110.061	-10.9719	1.45481	-7.54181	4.63491e-14	4.73264e-13
FvH4_1g22500	3.53786	2.82506	1.67795	1.68364	0.0922515	0.149091
FvH4_1g22510	6.20019	-1.94847	1.05775	-1.84209	0.065462	0.111336
FvH4_1g22550	5.9736	-1.02048	0.883339	-1.15525	0.247989	0.340766
FvH4_1g22570	604.821	1.56678	0.53933	2.90505	0.00367197	0.00871333
FvH4_1g22580	418.66	1.63482	0.569886	2.86868	0.00412186	0.00966708
FvH4_1g22590	1326.98	0.371724	0.284388	1.3071	0.191178	0.27528
FvH4_1g22591	761.044	-0.319351	0.327527	-0.975037	0.329542	0.429759
FvH4_1g22620	422.577	-1.82178	0.357493	-5.09597	3.46957e-07	1.61274e-06
FvH4_1g22650	352.765	1.81168	0.303277	5.97369	2.31944e-09	1.43621e-08
FvH4_1g22670	56.9189	-0.312346	0.485535	-0.643303	0.520028	0.617552
FvH4_1g22680	179.074	-1.23139	0.496174	-2.48178	0.0130728	0.0272136
FvH4_1g22681	3.58895	-1.12088	1.83697	-0.610181	0.541742	0.637384
FvH4_1g22710	201.196	1.10021	0.443945	2.47827	0.0132023	0.0274576
FvH4_1g22720	160.306	-1.32605	0.557216	-2.37978	0.017323	0.0349428
FvH4_1g22730	137.33	3.04787	0.507697	6.00331	1.93329e-09	1.20747e-08
FvH4_1g22740	148.287	1.43327	0.438114	3.27144	0.00107001	0.0028199
FvH4_1g22750	1029.09	1.20893	0.433897	2.78623	0.00533257	0.0121884
FvH4_1g22760	2.72696	3.54606	1.91561	1.85114	0.0641493	0.10932
FvH4_1g22770	160.328	-0.220337	0.567516	-0.388249	0.697832	0.77367
FvH4_1g22780	162.66	1.38438	0.722432	1.91628	0.0553297	0.0965504
FvH4_1g22810	367.216	0.0792078	0.345928	0.228972	0.818891	0.874724
FvH4_1g22820	44.0907	-5.49611	0.643606	-8.53957	1.34727e-17	1.88382e-16
FvH4_1g22830	0.457822	0	4.88545	0	1	1
FvH4_1g22870	10.9278	-7.36259	1.30992	-5.62066	1.9023e-08	1.04514e-07
FvH4_1g22880	57.2248	0.414835	0.512755	0.809031	0.418497	0.520638
FvH4_1g22881	231.634	-2.03298	0.440693	-4.61314	3.96638e-06	1.58825e-05
FvH4_1g22890	2361.27	1.00979	0.405396	2.49086	0.0127434	0.026612
FvH4_1g22900	4.71504	-0.516384	2.56094	-0.201639	0.840199	0.891203
FvH4_1g22910	235.024	1.36208	0.377594	3.60725	0.00030946	0.0009071
FvH4_1g22920	258.13	-2.13803	0.291487	-7.33489	2.21896e-13	2.12602e-12
FvH4_1g22940	33.1409	-2.98102	0.383667	-7.76981	7.86009e-15	8.61567e-14
FvH4_1g22950	1.71896	-4.99681	2.07437	-2.40883	0.0160038	0.0325666
FvH4_1g22971	44.0673	-1.35394	0.377637	-3.58529	0.000336704	0.000981594
FvH4_1g22980	3.46188	-1.97997	1.03458	-1.91379	0.0556465	0.0969648
FvH4_1g22990	1.93278	-0.516372	2.69393	-0.19168	0.847993	0.896437
FvH4_1g23000	84.9804	-3.52144	0.567481	-6.20538	5.45657e-10	3.61917e-09
FvH4_1g23030	0.525108	-2.75839	4.66053	-0.591863	0.553943	0.64843
FvH4_1g23040	187.554	0.878014	0.344082	2.55176	0.010718	0.0228126
FvH4_1g23050	675.755	0.624155	0.463534	1.34651	0.178137	0.259549
FvH4_1g23080	737.528	1.67906	0.465698	3.60547	0.00031159	0.000912898
FvH4_1g23082	392.18	3.67687	0.468374	7.85028	4.15103e-15	4.66667e-14
FvH4_1g23130	773.85	-1.04152	0.475754	-2.1892	0.028582	0.0542768
FvH4_1g23140	1150.54	1.9686	0.428913	4.58974	4.43801e-06	1.76291e-05
FvH4_1g23150	635.327	3.3886	0.236159	14.3488	1.08446e-46	9.94325e-45
FvH4_1g23160	61.867	2.68862	0.479766	5.60403	2.09429e-08	1.14207e-07
FvH4_1g23210	58.8898	-0.87262	0.338698	-2.5764	0.00998354	0.0213877
FvH4_1g23213	966.882	0.706089	0.381597	1.85035	0.0642627	0.109496
FvH4_1g23230	8.67802	-1.04282	0.601856	-1.73267	0.083154	0.136658
FvH4_1g23232	123.253	-12.7896	4.8924	-2.61417	0.00894458	0.0193791
FvH4_1g23240	667.192	1.30911	0.273893	4.77966	1.75594e-06	7.37866e-06
FvH4_1g23250	45.7161	-9.09533	1.33658	-6.80493	1.01095e-11	8.20352e-11
FvH4_1g23260	75.3868	1.04294	0.436567	2.38895	0.0168965	0.0341877
FvH4_1g23270	2.0946	-4.42496	1.98322	-2.2312	0.0256679	0.0493251
FvH4_1g23280	1257.36	1.02884	0.748497	1.37454	0.169275	0.2489
FvH4_1g23290	9.40355	-9.0828	4.89546	-1.85535	0.0635459	0.108498
FvH4_1g23291	8.26206	-2.18611	0.827478	-2.64189	0.00824447	0.0180122
FvH4_1g23300	5.38134	-0.989046	0.876796	-1.12802	0.25931	0.35365
FvH4_1g23310	1000.9	1.8034	0.797839	2.26036	0.0237991	0.0461821
FvH4_1g23320	87.5035	-0.170166	0.263794	-0.645072	0.518881	0.616628
FvH4_1g23330	39.9858	1.21409	0.775472	1.56562	0.117438	0.182808
FvH4_1g23340	97.5787	2.09493	0.391665	5.34879	8.85457e-08	4.44457e-07
FvH4_1g23350	11.768	-6.63092	1.32578	-5.00153	5.68772e-07	2.56234e-06
FvH4_1g23360	161.331	0.22018	0.376096	0.585436	0.558255	0.652352
FvH4_1g23370	3.1025	-7.11485	1.73808	-4.09351	4.24891e-05	0.000144859
FvH4_1g23380	5.42077	-5.8303	1.41018	-4.13443	3.55831e-05	0.000122906
FvH4_1g23390	37.0649	-10.7671	1.42154	-7.57424	3.6123e-14	3.7276e-13
FvH4_1g23400	27.9827	-8.6778	1.21468	-7.1441	9.05903e-13	8.17471e-12
FvH4_1g23421	8.70141	-6.82182	1.81256	-3.76364	0.000167457	0.000517594
FvH4_1g23440	149.9	-0.523522	0.523025	-1.00095	0.316851	0.416388
FvH4_1g23450	335.025	-0.589103	0.423164	-1.39214	0.16388	0.242046
FvH4_1g23460	72.1401	-2.16962	0.314875	-6.89042	5.56263e-12	4.63491e-11
FvH4_1g23470	273.582	-0.727702	0.192279	-3.78462	0.000153944	0.000478205
FvH4_1g23480	8.85383	-5.96015	1.38097	-4.31592	1.58938e-05	5.80626e-05
FvH4_1g23490	13677.6	2.3616	0.451468	5.23094	1.68652e-07	8.17568e-07
FvH4_1g23500	4.6848	0.502023	1.0168	0.493727	0.621499	0.707627
FvH4_1g23510	173.988	0.889755	0.334923	2.6566	0.0078934	0.017343
FvH4_1g23520	5.47876	-1.03845	0.838664	-1.23821	0.215637	0.303682
FvH4_1g23521	18.3622	-0.213365	0.501569	-0.425396	0.670548	0.750644
FvH4_1g23532	1.1836	0.757459	2.87263	0.263682	0.792025	0.852704
FvH4_1g23540	4.96658	2.74128	1.71398	1.59937	0.109739	0.172771
FvH4_1g23541	3.92875	2.23701	1.32975	1.68229	0.0925134	0.149491
FvH4_1g23542	36.0791	-0.261743	0.37049	-0.706478	0.479891	0.58055
FvH4_1g23550	64.9362	-0.82442	0.472219	-1.74584	0.080838	0.13342
FvH4_1g23560	2.68388	-4.46211	1.43506	-3.10936	0.00187492	0.00472148
FvH4_1g23570	166.679	-3.68479	0.619575	-5.94729	2.72616e-09	1.67508e-08
FvH4_1g23580	2.98671	3.37445	1.71066	1.97259	0.0485418	0.0860641
FvH4_1g23590	303.346	0.286386	0.432813	0.661686	0.508172	0.606413
FvH4_1g23600	132.284	-1.42256	0.520995	-2.73047	0.00632444	0.0142302
FvH4_1g23610	9.12177	-6.60922	1.48698	-4.44473	8.80041e-06	3.34835e-05
FvH4_1g23620	94.9035	-0.405728	0.603162	-0.672667	0.501159	0.599878
FvH4_1g23630	43.9609	-0.0900059	0.97704	-0.092121	0.926602	0.952269
FvH4_1g23640	1.49263	-6.11604	2.50545	-2.44109	0.0146428	0.0300651
FvH4_1g23660	112.208	1.8227	0.428826	4.25045	2.13343e-05	7.63766e-05
FvH4_1g23670	791.787	-0.540954	0.33633	-1.6084	0.107747	0.170078
FvH4_1g23671	1.98844	4.7776	4.11508	1.161	0.245643	0.338281
FvH4_1g23681	30.9051	2.46772	1.17946	2.09225	0.0364162	0.0671477
FvH4_1g23710	2174.52	4.22654	0.578559	7.3053	2.76658e-13	2.62262e-12
FvH4_1g23711	142.981	3.37428	0.485145	6.95521	3.52032e-12	3.00025e-11
FvH4_1g23740	12.317	-3.72412	0.74764	-4.98117	6.32012e-07	2.82449e-06
FvH4_1g23750	5.70363	1.74434	1.5312	1.1392	0.25462	0.34821
FvH4_1g23760	2.13839	0.733282	2.06164	0.35568	0.72208	0.7941
FvH4_1g23790	1115.34	-3.20788	0.287306	-11.1654	6.02296e-29	1.96136e-27
FvH4_1g23791	20.8312	-1.02012	0.562339	-1.81406	0.0696688	0.117402
FvH4_1g23800	1.02018	1.9709	2.84356	0.693111	0.48824	0.588709
FvH4_1g23802	3.53806	-0.396178	1.02242	-0.38749	0.698394	0.774025
FvH4_1g23805	46.7051	0.441392	0.406996	1.08451	0.278138	0.374669
FvH4_1g23806	18.5011	-1.30876	0.575804	-2.27293	0.0230307	0.0448817
FvH4_1g23810	8.13264	-4.8805	1.49484	-3.26489	0.00109505	0.00288048
FvH4_1g23821	2.02353	-6.86855	4.90744	-1.39962	0.161627	0.239291
FvH4_1g23831	1.17057	-1.03417	2.28408	-0.452772	0.650713	0.73265
FvH4_1g23850	91.2143	0.795377	0.499307	1.59296	0.111169	0.174593
FvH4_1g23851	56.7894	0.27028	0.761578	0.354895	0.722669	0.79463
FvH4_1g23870	86.8034	0.876394	0.34788	2.51924	0.0117607	0.024768
FvH4_1g23880	175.655	1.46185	0.452254	3.23237	0.00122766	0.00319885
FvH4_1g23890	752.503	0.893	0.509344	1.75324	0.0795617	0.131712
FvH4_1g23900	5.05374	-0.643577	0.913734	-0.704337	0.481223	0.581722
FvH4_1g23910	410.52	-0.260183	0.457396	-0.568836	0.569467	0.662612
FvH4_1g23920	545.637	0.0683337	0.315581	0.216533	0.828572	0.882411
FvH4_1g23940	7.34484	0.187366	0.844108	0.221969	0.824338	0.879371
FvH4_1g23941	5.52675	-0.835691	0.954185	-0.875817	0.38113	0.483068
FvH4_1g23950	285.725	-0.626944	0.458918	-1.36614	0.171896	0.252059
FvH4_1g23960	2.67683	-0.614187	1.44541	-0.424922	0.670894	0.750874
FvH4_1g23970	569.725	2.06446	0.44012	4.69068	2.72299e-06	1.11247e-05
FvH4_1g23971	11.232	-1.38532	0.898845	-1.54123	0.123262	0.190245
FvH4_1g23980	67.1876	3.51548	0.743598	4.72766	2.2712e-06	9.3869e-06
FvH4_1g23990	2.58763	-6.46267	1.83647	-3.51907	0.000433064	0.00123704
FvH4_1g24000	25.8491	-7.00049	1.03901	-6.73766	1.60956e-11	1.27601e-10
FvH4_1g24010	36.5335	-3.25628	0.455942	-7.14187	9.2071e-13	8.30234e-12
FvH4_1g24020	11.0055	-0.792883	0.840671	-0.943155	0.345602	0.447066
FvH4_1g24030	268.973	-1.97559	0.432488	-4.56797	4.92459e-06	1.94309e-05
FvH4_1g24040	22.8427	-5.06517	1.06345	-4.76296	1.90773e-06	7.97454e-06
FvH4_1g24041	33.6448	-0.418999	0.457973	-0.914899	0.360244	0.461724
FvH4_1g24050	15.4694	-4.46252	0.720117	-6.19693	5.7575e-10	3.80747e-09
FvH4_1g24060	32.1536	-0.63141	0.54974	-1.14856	0.250737	0.343991
FvH4_1g24090	382.467	-3.41346	0.788278	-4.33028	1.48923e-05	5.4609e-05
FvH4_1g24100	334.615	-0.504477	0.295017	-1.70999	0.0872668	0.142241
[truncated: 20,440 more rows]

## Sheet: Fvesca_Leaf-vs-Immature_genes
Gene_ID	baseMean	log2FoldChange	lfcSE	stat	pvalue	padj
FvH4_1g00010	549.798	-0.469648	0.510632	-0.919739	0.357709	0.483708
FvH4_1g00020	122.744	-0.268475	0.27235	-0.985772	0.324245	0.447984
FvH4_1g00030	132.77	1.86262	0.504723	3.69037	0.000223928	0.00103087
FvH4_1g00040	2265.69	0.766771	0.259042	2.96002	0.00307619	0.0100851
FvH4_1g00050	108.14	-0.0990003	0.281277	-0.351968	0.724862	0.811385
FvH4_1g00060	35.2435	5.24992	0.503597	10.4249	1.90957e-25	1.40565e-23
FvH4_1g00070	2803.44	-0.964694	0.216991	-4.44578	8.7572e-06	5.68001e-05
FvH4_1g00080	503.444	-0.298971	0.24302	-1.23023	0.218609	0.331377
FvH4_1g00090	2258.86	-0.922492	0.358296	-2.57466	0.0100339	0.0274614
FvH4_1g00100	234.759	1.48946	0.295495	5.04056	4.64169e-07	3.85244e-06
FvH4_1g00110	613.864	-1.10905	0.426559	-2.59998	0.00932284	0.0257434
FvH4_1g00120	55.8633	-1.30747	0.512624	-2.55054	0.0107557	0.0290957
FvH4_1g00130	67.8688	1.6063	0.305081	5.26516	1.40069e-07	1.27281e-06
FvH4_1g00150	7.32426	2.52488	1.95435	1.29193	0.196383	0.305586
FvH4_1g00160	242.566	2.10761	0.246446	8.55203	1.20944e-17	3.93625e-16
FvH4_1g00191	670.412	0.266807	0.216423	1.23281	0.217648	0.330299
FvH4_1g00200	830.467	0.715152	0.668376	1.06998	0.284627	0.40519
FvH4_1g00201	239.185	-2.63219	0.589653	-4.46397	8.04558e-06	5.24325e-05
FvH4_1g00210	890.91	-3.70811	0.60187	-6.16098	7.22947e-10	9.35057e-09
FvH4_1g00220	3.54795	0.0401906	1.15344	0.034844	0.972204	0.990906
FvH4_1g00230	121.741	-0.0439492	0.459658	-0.0956128	0.923828	0.959867
FvH4_1g00240	226.063	0.496684	0.452528	1.09758	0.272389	0.3923
FvH4_1g00250	607.009	-0.476837	0.242167	-1.96904	0.0489482	0.101949
FvH4_1g00300	2.39797	7.66954	4.90507	1.56359	0.117913	0.205428
FvH4_1g00330	735.202	-2.75263	0.685412	-4.01602	5.91898e-05	0.000316217
FvH4_1g00340	65.4051	2.37337	1.68868	1.40546	0.159884	0.260527
FvH4_1g00341	7.88123	1.10908	1.05143	1.05483	0.291502	0.412626
FvH4_1g00342	349.221	-0.47229	0.880572	-0.536345	0.59172	0.704515
FvH4_1g00343	212.78	1.63416	0.822565	1.98666	0.0469599	0.098632
FvH4_1g00344	107.694	0.352861	0.809217	0.436052	0.662799	0.76197
FvH4_1g00345	1803.67	-2.36398	0.432906	-5.46072	4.74196e-08	4.72817e-07
FvH4_1g00346	354.901	-2.19689	0.500875	-4.38611	1.15397e-05	7.2615e-05
FvH4_1g00350	493.759	-2.1571	0.409536	-5.26718	1.38533e-07	1.26094e-06
FvH4_1g00360	202.333	0.447934	0.471267	0.950489	0.341864	0.46741
FvH4_1g00370	1794.59	-0.912035	0.318115	-2.867	0.00414387	0.0130043
FvH4_1g00380	725.325	-0.0595667	0.213218	-0.279371	0.77996	0.855418
FvH4_1g00390	543.494	-2.99284	0.792912	-3.7745	0.000160332	0.000764407
FvH4_1g00400	400.754	0.773733	0.383619	2.01693	0.0437028	0.0928541
FvH4_1g00410	582.175	-1.02851	0.37354	-2.75341	0.0058978	0.0175351
FvH4_1g00420	395.841	-1.97774	0.582345	-3.39616	0.000683388	0.00275263
FvH4_1g00421	3.57254	5.84428	1.79227	3.26083	0.00111085	0.00419843
FvH4_1g00430	282.206	0.715181	0.412148	1.73525	0.0826964	0.155236
FvH4_1g00440	899.521	-0.993157	0.716512	-1.3861	0.165716	0.267724
FvH4_1g00450	91.8169	0.15952	0.447475	0.35649	0.721474	0.808544
FvH4_1g00460	125.754	2.0458	0.829083	2.46755	0.0136041	0.0354629
FvH4_1g00470	182.134	1.09234	0.317159	3.44415	0.000572862	0.00236075
FvH4_1g00480	342.128	0.330405	0.218724	1.5106	0.130891	0.222564
FvH4_1g00490	89.0983	1.02335	0.340099	3.00899	0.00262121	0.00879996
FvH4_1g00500	204.636	6.06214	0.650512	9.31902	1.17419e-20	5.2998e-19
FvH4_1g00510	1423.64	-1.02742	0.238757	-4.30323	1.68329e-05	0.000102242
FvH4_1g00530	560.592	0.8785	0.343244	2.5594	0.0104852	0.0284835
FvH4_1g00540	377.094	3.57479	0.41689	8.57489	9.91828e-18	3.26678e-16
FvH4_1g00550	414.505	0.0832237	0.419146	0.198555	0.842611	0.902383
FvH4_1g00560	164.152	-0.679312	0.444522	-1.52818	0.126467	0.216732
FvH4_1g00580	65.9533	0.834842	0.257286	3.2448	0.00117534	0.00440422
FvH4_1g00590	203.898	1.6502	0.270581	6.09874	1.06907e-09	1.35243e-08
FvH4_1g00620	5.81656	2.15183	1.02979	2.08958	0.0366553	0.0805924
FvH4_1g00630	161.836	-2.18307	0.343606	-6.35339	2.10617e-10	2.91857e-09
FvH4_1g00640	524.617	-1.91649	0.419001	-4.57395	4.78618e-06	3.2799e-05
FvH4_1g00650	80.2675	2.00291	0.258011	7.76288	8.30191e-15	2.01673e-13
FvH4_1g00660	145.124	1.65754	0.278565	5.9503	2.67653e-09	3.20307e-08
FvH4_1g00670	24.028	2.36227	0.460857	5.12582	2.96248e-07	2.54943e-06
FvH4_1g00680	20.4509	1.43189	0.471951	3.03397	0.00241354	0.00820575
FvH4_1g00690	339.389	1.76975	0.373842	4.73394	2.20198e-06	1.60901e-05
FvH4_1g00700	3.047	0.626101	1.4786	0.423442	0.671973	0.76885
FvH4_1g00710	868.702	-0.466645	0.984006	-0.47423	0.635336	0.739663
FvH4_1g00720	1009.19	0.00668695	0.13943	0.0479591	0.961749	0.98409
FvH4_1g00730	88.3128	-0.297225	0.375393	-0.791771	0.428494	0.553854
FvH4_1g00750	12.9192	-5.90392	1.39863	-4.22121	2.42992e-05	0.000142526
FvH4_1g00760	192.125	-0.619052	0.287271	-2.15494	0.0311668	0.0704966
FvH4_1g00770	330.004	0.278609	0.384336	0.72491	0.468507	0.592139
FvH4_1g00780	79.051	-0.581541	0.42567	-1.36618	0.171882	0.275514
FvH4_1g00800	63.0971	-1.77682	0.436518	-4.07043	4.69264e-05	0.000257666
FvH4_1g00810	393.761	0.0655441	0.420763	0.155774	0.876211	0.926783
FvH4_1g00811	0.733697	-0.386977	2.9878	-0.129519	0.896947	NA
FvH4_1g00820	2.31504	6.63503	3.94621	1.68137	0.0926914	0.169737
FvH4_1g00830	1473.84	-0.303279	0.136869	-2.21583	0.0267033	0.0621499
FvH4_1g00860	34.2219	-0.47807	0.354409	-1.34892	0.177362	0.282276
FvH4_1g00870	586.115	0.392401	0.328598	1.19417	0.232411	0.347595
FvH4_1g00880	230.991	0.783515	0.502273	1.55994	0.118775	0.206666
FvH4_1g00890	182.347	0.646065	0.274483	2.35375	0.0185851	0.0460763
FvH4_1g00910	5.00533	-0.322011	1.12266	-0.286828	0.774244	0.850765
FvH4_1g00920	314.537	-1.84798	0.582378	-3.17316	0.00150788	0.0054493
FvH4_1g00930	3021.16	-1.58856	0.34213	-4.64315	3.43129e-06	2.4086e-05
FvH4_1g00940	236.086	-0.265056	0.352588	-0.751743	0.452205	0.576184
FvH4_1g00950	206.747	-0.81312	0.236977	-3.43121	0.000600891	0.00246009
FvH4_1g00960	185.512	-0.267425	0.498236	-0.536744	0.591445	0.704377
FvH4_1g00970	177.741	-0.533484	0.46929	-1.13679	0.255626	0.374101
FvH4_1g00971	207.715	-0.190902	0.293972	-0.649388	0.516087	0.636327
FvH4_1g00990	6472.35	-0.697694	0.139725	-4.99334	5.93431e-07	4.85184e-06
FvH4_1g01000	81.6138	1.0418	0.416207	2.50308	0.0123119	0.0325508
FvH4_1g01010	539.931	0.641134	0.222303	2.88406	0.00392589	0.0124386
FvH4_1g01020	83.0643	2.2467	0.59398	3.78245	0.000155291	0.000742636
FvH4_1g01030	551.596	1.79898	0.363229	4.95274	7.31753e-07	5.8776e-06
FvH4_1g01040	30.298	4.24807	0.710017	5.98305	2.18993e-09	2.65846e-08
FvH4_1g01050	399.213	0.137445	0.571746	0.240396	0.810024	0.87829
FvH4_1g01060	100.338	0.133087	0.478205	0.278305	0.780778	0.856058
FvH4_1g01070	2269.16	1.6345	0.89117	1.8341	0.0666384	0.130283
FvH4_1g01090	173.545	0.338895	0.388478	0.872367	0.383008	0.509161
FvH4_1g01100	105.78	-0.16794	0.322231	-0.521179	0.602242	0.713346
FvH4_1g01110	217.067	2.99905	0.93349	3.21272	NA	NA
FvH4_1g01120	78.0441	-0.709755	0.461188	-1.53897	0.123811	0.213181
FvH4_1g01130	844.01	1.40451	0.623433	2.25286	0.0242677	0.0574504
FvH4_1g01140	450.796	-1.35878	0.675257	-2.01224	0.0441948	0.0937398
FvH4_1g01150	199.871	0.711892	0.318849	2.23269	0.0255692	0.0599695
FvH4_1g01160	330.852	-1.81489	0.456328	-3.97716	6.97421e-05	0.000365209
FvH4_1g01170	480.172	-1.03715	0.422598	-2.45423	0.0141185	0.0365518
FvH4_1g01180	823.129	1.08005	0.472325	2.28667	0.0222148	0.0534735
FvH4_1g01190	17.346	7.95392	1.02281	7.77655	7.45269e-15	1.81849e-13
FvH4_1g01200	18.9289	0.754219	0.495049	1.52352	0.127628	0.218313
FvH4_1g01202	61.5579	-3.11535	0.925042	-3.3678	0.000757718	0.00301548
FvH4_1g01210	2.82986	0.888587	1.4739	0.602881	0.546588	0.663822
FvH4_1g01220	2.66817	1.45797	1.42999	1.01957	0.307934	0.430409
FvH4_1g01230	14.8025	-0.122649	0.945128	-0.12977	0.896748	0.940435
FvH4_1g01240	4.44949	-0.0108847	2.08802	-0.00521292	0.995841	1
FvH4_1g01250	1396.31	-0.230979	0.182364	-1.26658	0.205304	0.315866
FvH4_1g01260	1107.69	-1.20191	0.378572	-3.17486	0.00149909	0.00542194
FvH4_1g01270	73.5255	0.0455222	0.284151	0.160204	0.87272	0.924421
FvH4_1g01280	555.05	-0.607447	0.423095	-1.43572	0.151081	0.249238
FvH4_1g01290	64.4852	-0.310281	0.407167	-0.762049	0.446031	0.570137
FvH4_1g01300	43.697	-1.83391	0.430411	-4.26083	2.0367e-05	0.000121836
FvH4_1g01310	45.4104	-0.619782	0.489337	-1.26658	0.205307	0.315866
FvH4_1g01320	77.8414	-0.250449	0.335215	-0.747129	0.454986	0.579053
FvH4_1g01321	4.11252	8.42334	3.36114	2.5061	0.0122071	0.0323244
FvH4_1g01322	1.07623	6.51485	4.92081	1.32394	0.185523	0.292065
FvH4_1g01350	12.6468	0.474731	0.528831	0.897699	0.369346	0.495261
FvH4_1g01360	33.0015	-1.31437	0.916123	-1.43471	0.15137	0.249507
FvH4_1g01363	19.0309	-1.17832	0.623394	-1.89017	0.0587358	0.118075
FvH4_1g01365	8.75824	-1.06391	0.76496	-1.39081	0.164283	0.265956
FvH4_1g01380	19.9432	-1.53162	1.22202	-1.25335	0.210078	0.321493
FvH4_1g01381	13.9623	0.763306	0.604786	1.26211	0.20691	0.317663
FvH4_1g01382	9.38026	9.55314	1.68509	5.66923	1.43443e-08	1.55003e-07
FvH4_1g01383	9.37055	-3.89157	1.49415	-2.60453	0.00919993	0.0254521
FvH4_1g01390	32.3619	-1.93363	0.567163	-3.4093	0.000651305	0.00264086
FvH4_1g01420	12.7185	0.809005	0.747417	1.0824	0.279074	0.399124
FvH4_1g01430	109.295	-1.52785	0.363387	-4.20447	2.61693e-05	0.000152429
FvH4_1g01440	1232.39	-1.25238	0.491012	-2.55061	0.0107534	0.0290932
FvH4_1g01450	85.1501	0.224731	0.481236	0.466987	0.640509	0.743988
FvH4_1g01460	10.0983	-0.931964	0.928979	-1.00321	0.315758	0.439386
FvH4_1g01480	111.496	-0.255674	0.385804	-0.662705	0.50752	0.628874
FvH4_1g01490	227.011	-1.49176	0.719688	-2.07279	0.0381922	0.0833119
FvH4_1g01491	33.2469	-0.508358	0.544934	-0.93288	0.350882	0.476562
FvH4_1g01500	3.59321	-3.40649	1.81368	-1.87822	0.0603515	0.120593
FvH4_1g01520	36.2864	0.0121273	0.746978	0.0162351	0.987047	1
FvH4_1g01530	208.488	1.70225	0.39898	4.26652	1.98548e-05	0.000118998
FvH4_1g01540	265.268	-1.33621	0.759718	-1.75883	0.0786071	0.148928
FvH4_1g01550	1331.67	-0.537173	0.596597	-0.900396	0.36791	0.493848
FvH4_1g01560	83.3873	3.70687	0.751169	4.9348	8.02316e-07	6.40452e-06
FvH4_1g01570	1096.67	1.02481	0.570159	1.79741	0.0722699	0.139209
FvH4_1g01590	622.68	0.6492	0.221368	2.93267	0.0033606	0.0108505
FvH4_1g01600	2.04002	5.89175	3.68155	1.60035	0.109522	0.193732
FvH4_1g01610	813.821	4.56352	0.439814	10.376	3.18821e-25	2.25602e-23
FvH4_1g01620	26.7291	0	2.10436	0	1	1
FvH4_1g01660	170.915	-0.516527	0.286833	-1.8008	0.0717349	0.138397
FvH4_1g01700	3.5076	-0.647052	1.59029	-0.406877	0.684098	0.778664
FvH4_1g01701	250.609	0.594757	0.436036	1.36401	0.172565	0.276366
FvH4_1g01710	92.0738	3.53734	0.267745	13.2116	7.52147e-40	1.79338e-37
FvH4_1g01720	464.155	-0.398455	0.430999	-0.924492	0.35523	0.481127
FvH4_1g01730	239.511	0.321235	0.537985	0.597107	0.550436	0.66709
FvH4_1g01750	910.204	-1.58862	0.561415	-2.82967	0.00465957	0.0143819
FvH4_1g01760	13.1996	2.17498	0.68532	3.17366	0.00150529	0.00544255
FvH4_1g01770	393.57	-0.625555	0.576973	-1.0842	0.278276	0.398474
FvH4_1g01771	8097.33	2.34054	0.749252	3.12384	0.0017851	0.00630461
FvH4_1g01772	2192.62	0.832379	0.582808	1.42822	0.153228	0.25207
FvH4_1g01790	231.4	2.71659	0.399525	6.79956	1.04939e-11	1.73863e-10
FvH4_1g01800	158.18	0.0999138	0.577357	0.173054	0.862609	0.91661
FvH4_1g01810	309.826	-1.56841	0.401843	-3.90304	9.49927e-05	0.000479721
FvH4_1g01820	532.253	-0.0931212	0.170115	-0.547401	0.584103	0.697609
FvH4_1g01830	7.67376	-2.43345	1.60611	-1.51512	0.129742	0.221068
FvH4_1g01840	28.1989	5.2034	0.92636	5.61703	1.94265e-08	2.06206e-07
FvH4_1g01870	152.134	4.94513	0.338026	14.6294	1.82342e-48	8.69532e-46
FvH4_1g01880	1383.84	-0.757933	0.755368	-1.0034	0.31567	0.439318
FvH4_1g01890	187.732	4.10876	1.26078	3.2589	0.00111847	0.0042243
FvH4_1g01891	356.708	1.21705	0.165466	7.35525	1.90573e-13	3.97e-12
FvH4_1g01900	6.73876	-2.9063	1.86559	-1.55785	0.119269	0.207247
FvH4_1g01910	12.8822	-3.77173	1.71517	-2.19904	0.0278748	0.0644118
FvH4_1g01920	4.56929	0.182303	2.46257	0.0740296	0.940987	0.970862
FvH4_1g01930	610.15	2.76873	0.764098	3.62352	0.000290619	0.00129838
FvH4_1g01960	325.899	-1.91767	0.588087	-3.26087	0.00111073	0.00419843
FvH4_1g01970	86.4491	6.5552	0.45848	14.2977	2.26249e-46	9.19073e-44
FvH4_1g01971	42.1018	0.594546	0.388335	1.53101	0.125767	0.215802
FvH4_1g01990	500.303	-0.576221	0.166149	-3.46809	0.000524181	0.00218186
FvH4_1g02000	395.672	0.0662518	0.435808	0.152021	0.879171	0.928414
FvH4_1g02010	152.003	2.16982	0.297493	7.29367	3.01621e-13	6.09802e-12
FvH4_1g02011	1.05511	0	3.92227	0	1	1
FvH4_1g02012	0.943526	0	4.1648	0	1	1
FvH4_1g02020	563.026	-1.17827	0.611997	-1.92529	0.0541931	0.110687
FvH4_1g02030	512.914	0.0385865	0.188698	0.204488	0.837972	0.899083
FvH4_1g02070	41.4304	-2.09299	0.445552	-4.69752	2.63338e-06	1.89957e-05
FvH4_1g02080	452.402	-0.282046	0.444454	-0.634591	0.525695	0.645056
FvH4_1g02100	12.9401	-1.57989	0.755463	-2.09129	0.036502	0.0803198
FvH4_1g02110	130.319	0.944743	0.201282	4.69363	2.68396e-06	1.93098e-05
FvH4_1g02111	7.94383	2.69346	0.92664	2.9067	0.00365269	0.0116682
FvH4_1g02112	266.565	-5.03009	1.50066	-3.35193	0.000802514	0.00316561
FvH4_1g02120	20227.1	-3.05239	1.10114	-2.77203	0.00557074	0.0167155
FvH4_1g02121	474.235	-0.626539	0.394766	-1.58712	0.112486	0.197891
FvH4_1g02150	688.495	-3.82531	0.443679	-8.62179	6.59169e-18	2.21432e-16
FvH4_1g02151	71.3339	-0.341766	0.363081	-0.941294	0.346554	0.472145
FvH4_1g02152	42.6156	1.31347	0.530588	2.47549	0.0133054	0.0347832
FvH4_1g02160	87.4797	11.8941	1.27468	9.33109	1.0479e-20	4.76904e-19
FvH4_1g02170	240.834	3.71148	0.538027	6.89832	5.26223e-12	9.03226e-11
FvH4_1g02190	2222.57	-2.80668	0.549322	-5.10935	3.23264e-07	2.76027e-06
FvH4_1g02200	59.394	0.739005	0.598806	1.23413	0.217154	0.329708
FvH4_1g02210	69.3941	0.986556	0.321485	3.06874	0.00214962	0.00740602
FvH4_1g02220	39.6295	1.44217	0.398818	3.61612	0.000299055	0.00133172
FvH4_1g02230	254.213	-0.426841	0.345891	-1.23403	0.21719	0.329709
FvH4_1g02250	0.879974	-0.782258	3.2293	-0.242238	0.808596	NA
FvH4_1g02270	123.032	-1.26669	0.359845	-3.52009	0.000431396	0.00184165
FvH4_1g02310	89.454	-0.477853	0.602765	-0.79277	0.427912	0.553329
FvH4_1g02340	553.398	-0.153181	0.168156	-0.910947	0.362323	0.488442
FvH4_1g02350	0.697323	-1.8246	2.87883	-0.633799	0.526212	NA
FvH4_1g02370	5.24255	-3.61505	1.62744	-2.22132	0.0263296	0.0614104
FvH4_1g02380	20.4974	-2.11749	0.687928	-3.07807	0.00208349	0.00721899
FvH4_1g02382	1.2104	0	4.14107	0	1	1
FvH4_1g02420	214.153	0.563132	0.412101	1.36649	0.171785	0.275419
FvH4_1g02430	153.759	-1.36383	0.574435	-2.37421	0.0175864	0.043983
FvH4_1g02440	1211.9	-0.181017	0.249104	-0.726673	0.467426	0.59108
FvH4_1g02450	699.135	0.179041	0.2614	0.684929	0.493389	0.615361
FvH4_1g02451	2.03286	-1.80321	2.16104	-0.834417	0.404046	0.529903
FvH4_1g02460	413.12	-1.57754	0.415256	-3.79895	0.000145313	0.000700258
FvH4_1g02470	390.584	-1.4214	0.256972	-5.53133	3.17812e-08	3.26606e-07
FvH4_1g02480	2.99584	-3.32285	1.92165	-1.72917	0.0837795	0.156808
FvH4_1g02481	14.3895	6.04517	1.42774	4.23408	2.29485e-05	0.000135468
FvH4_1g02490	2306.16	-0.769456	0.291385	-2.64068	0.00827388	0.0233015
FvH4_1g02500	458.521	3.98511	0.456087	8.73762	2.38075e-18	8.40967e-17
FvH4_1g02520	1.28581	0.19986	2.78415	0.0717848	0.942773	0.972065
FvH4_1g02530	177.94	-0.077591	0.257333	-0.30152	0.763018	0.841845
FvH4_1g02540	692.293	1.34339	0.263065	5.1067	3.2784e-07	2.79499e-06
FvH4_1g02550	148.906	0.728112	0.313162	2.32503	0.0200704	0.0491092
FvH4_1g02560	6.42033	4.49264	1.45826	3.08082	0.0020643	0.00715815
FvH4_1g02570	4015.91	10.3393	1.11088	9.30731	NA	NA
FvH4_1g02580	305.504	0.804094	0.414164	1.94149	0.0521995	0.107305
FvH4_1g02590	77.6489	0.489607	0.332663	1.47178	0.14108	0.236242
FvH4_1g02620	669.565	0.00935013	0.672373	0.0139062	0.988905	1
FvH4_1g02621	389.697	1.6359	0.397833	4.11203	3.92188e-05	0.000218851
FvH4_1g02623	30.8143	-1.22311	0.74516	-1.6414	0.100714	0.181593
FvH4_1g02630	2.48807	2.95504	1.44714	2.04199	0.0411525	0.0883894
FvH4_1g02650	74.7227	1.70868	0.506186	3.37559	0.000736577	0.00294038
FvH4_1g02660	668.02	0.36327	0.384454	0.9449	0.34471	0.470154
FvH4_1g02670	78.9431	0.99127	0.66915	1.48139	0.138503	0.232956
FvH4_1g02680	834.842	0.216991	0.242519	0.894739	0.370927	0.496912
FvH4_1g02690	5.05919	6.66316	1.85429	3.59337	0.000326429	0.00144192
FvH4_1g02700	19.1551	5.41194	0.783344	6.90877	4.88886e-12	8.44426e-11
FvH4_1g02710	89.7595	0.183489	0.425939	0.430786	0.666624	0.764925
FvH4_1g02720	517.284	3.12257	1.15538	2.70263	0.00687927	0.0199881
FvH4_1g02730	2983.28	0.723711	0.319548	2.26479	0.0235253	0.0560376
FvH4_1g02740	0.530369	-1.78669	3.84415	-0.464782	0.642088	NA
FvH4_1g02750	1.03689	0.916695	2.45039	0.374101	0.708329	0.798039
FvH4_1g02760	288.126	-2.99505	0.652949	-4.58697	4.49731e-06	3.08967e-05
FvH4_1g02770	20.2661	-4.51465	1.37504	-3.28328	0.00102606	0.00392392
FvH4_1g02780	116.587	-0.23925	0.357763	-0.668738	0.503662	0.624977
FvH4_1g02800	37.7138	1.30402	0.3937	3.3122	0.000925643	0.00358617
FvH4_1g02820	319.467	1.05267	0.594001	1.77217	0.0763657	0.145539
FvH4_1g02840	13.1096	4.73507	1.78377	2.65453	0.00794178	0.022537
FvH4_1g02850	72.9076	-0.683508	0.48796	-1.40075	0.16129	0.26237
FvH4_1g02860	0.990992	-0.358551	3.11922	-0.114949	0.908485	0.948842
FvH4_1g02870	0.702751	-0.407889	2.4102	-0.169234	0.865612	NA
FvH4_1g02880	16.8517	3.42797	0.951635	3.60219	0.000315542	0.00139861
FvH4_1g02890	121.124	5.77477	0.727283	7.9402	2.01857e-15	5.20932e-14
FvH4_1g02900	7.1665	6.62291	1.70254	3.89002	0.000100237	0.000503386
FvH4_1g02950	32.9479	3.38266	0.634558	5.33074	9.7811e-08	9.16915e-07
FvH4_1g02980	1.73358	1.32045	1.65608	0.797331	0.425259	0.55082
FvH4_1g02990	255.346	-0.10329	0.26675	-0.387217	0.698596	0.789714
FvH4_1g03000	3.52095	2.80521	1.00274	2.79754	0.00514931	0.0156708
FvH4_1g03001	3.21021	5.27856	1.60959	3.27945	0.0010401	0.00396863
FvH4_1g03010	207.175	3.6745	0.499591	7.35502	1.90903e-13	3.97311e-12
FvH4_1g03020	553.192	1.42609	0.465052	3.06651	0.00216575	0.00745221
FvH4_1g03040	142.165	9.16762	0.841821	10.8902	1.28333e-27	1.18282e-25
FvH4_1g03050	292.951	1.48936	0.324079	4.59568	4.31337e-06	2.97261e-05
FvH4_1g03060	14.2419	-3.64879	0.86071	-4.23928	2.24238e-05	0.000132656
FvH4_1g03080	70.5137	0.570359	0.703572	0.810662	0.41756	0.543112
FvH4_1g03090	731.498	0.112781	0.493537	0.228515	0.819246	0.884841
FvH4_1g03100	43.9255	-1.25624	0.426779	-2.94355	0.00324472	0.0105384
FvH4_1g03120	2.6417	2.24577	1.63374	1.37462	0.16925	0.27203
FvH4_1g03130	271.777	0.00949212	0.245972	0.0385902	0.969217	0.988892
FvH4_1g03140	184.742	-0.257302	0.298669	-0.861495	0.388966	0.515581
FvH4_1g03150	260.93	-0.982873	0.300749	-3.26808	0.00108279	0.00410795
FvH4_1g03160	368.137	-0.367345	0.705788	-0.520474	0.602733	0.713637
FvH4_1g03170	144.67	-0.540223	0.711035	-0.759771	0.447392	0.571551
FvH4_1g03180	285.636	-0.581841	0.27475	-2.11771	0.0341995	0.0760908
FvH4_1g03190	12.5751	10.0586	4.89462	2.05503	0.0398765	0.0862229
FvH4_1g03200	29.9252	0.157544	0.743674	0.211846	0.832227	0.894845
FvH4_1g03202	15.162	-1.17456	1.06068	-1.10737	0.268133	0.387473
FvH4_1g03240	727.476	0.930133	0.369717	2.51579	0.0118764	0.0316168
FvH4_1g03260	1267.32	1.48834	0.481486	3.09114	0.00199392	0.00694374
FvH4_1g03270	160.286	1.40695	0.569116	2.47216	0.0134298	0.0350627
FvH4_1g03280	593.757	0.0380689	0.426459	0.0892674	0.928869	0.963088
FvH4_1g03290	174.952	0.180052	1.78806	0.100697	0.919791	0.957232
FvH4_1g03300	1089.84	-4.31638	1.59755	-2.70187	0.00689499	0.0200159
FvH4_1g03310	680.294	-4.66255	1.54598	-3.01591	0.00256211	0.00863457
FvH4_1g03311	2.69589	0	3.14954	0	1	1
FvH4_1g03320	408.993	-0.0710132	0.329177	-0.21573	0.829199	0.89251
FvH4_1g03330	4.23163	2.44129	0.921709	2.64866	0.00808126	0.022853
FvH4_1g03331	19.0101	1.62881	0.495272	3.28872	0.00100646	0.00385703
FvH4_1g03340	468.224	-0.939698	0.288451	-3.25773	0.00112306	0.00423507
FvH4_1g03350	46.8358	0.676002	0.376086	1.79746	0.0722619	0.139208
FvH4_1g03360	944.194	-0.285023	0.869618	-0.327757	0.743096	0.825664
FvH4_1g03370	33.1858	1.21197	1.29344	0.937019	0.348749	0.474279
FvH4_1g03371	393.235	-2.28034	0.544937	-4.1846	2.85667e-05	0.000164645
FvH4_1g03372	308.311	-0.439971	0.18613	-2.36378	0.0180895	0.0450462
FvH4_1g03410	471.117	-0.710361	0.23698	-2.99755	0.00272155	0.00908779
FvH4_1g03420	41.9257	9.8666	2.69972	3.65468	0.000257505	0.0011644
FvH4_1g03430	10.4422	0.411232	0.838641	0.490355	0.623883	0.730711
FvH4_1g03440	9.72622	-0.961061	0.814077	-1.18055	0.237781	0.353677
FvH4_1g03450	2.43308	-2.15382	1.63602	-1.3165	0.188007	0.295255
FvH4_1g03460	1164.01	-1.6191	0.389362	-4.15834	3.20567e-05	0.000182838
FvH4_1g03470	384.482	-2.08816	0.362191	-5.76534	8.14926e-09	9.08806e-08
FvH4_1g03480	0.644475	-0.403842	3.42496	-0.117911	0.906138	NA
FvH4_1g03481	5.07309	3.53121	2.01864	1.7493	0.0802395	0.151435
FvH4_1g03490	907.022	-0.192867	0.35535	-0.542752	0.587301	0.700545
FvH4_1g03500	1132.15	-1.2035	0.562162	-2.14084	0.0322866	0.0725447
FvH4_1g03510	18.1698	4.53874	0.899253	5.04723	4.48262e-07	3.72889e-06
FvH4_1g03520	80.5325	-1.26736	0.324215	-3.909	9.26773e-05	0.000469508
FvH4_1g03540	177.504	1.92215	0.584708	3.28737	0.00101127	0.0038741
FvH4_1g03541	39.5565	2.54732	0.478256	5.32626	1.00257e-07	9.3944e-07
FvH4_1g03542	1.64356	6.81623	3.58927	1.89906	0.0575566	0.116192
FvH4_1g03550	96.2487	-0.0988601	0.25971	-0.380656	0.703458	0.794146
FvH4_1g03560	11.8325	-2.61968	1.42256	-1.84152	0.0655449	0.128592
FvH4_1g03570	518.475	-0.509476	0.363488	-1.40163	0.161026	0.262037
FvH4_1g03571	6.57432	-0.271847	1.06623	-0.25496	0.798754	0.869293
FvH4_1g03572	4.80523	-0.567506	0.945712	-0.600083	0.548451	0.665532
FvH4_1g03580	919.499	-0.555987	0.129466	-4.29446	1.75121e-05	0.00010603
FvH4_1g03590	114.308	-0.476686	0.481944	-0.98909	0.322619	0.446271
FvH4_1g03600	959.234	-0.578059	0.376846	-1.53394	0.125045	0.214815
FvH4_1g03610	134.494	-2.38256	0.32142	-7.41261	1.23835e-13	2.65019e-12
FvH4_1g03630	340.215	1.89936	1.06788	1.77862	0.0753013	0.143818
FvH4_1g03650	48.9303	-1.4021	1.00743	-1.39176	0.163996	0.26557
FvH4_1g03680	210.399	-0.798686	0.539372	-1.48077	0.138668	0.233179
FvH4_1g03690	45.0472	0.042337	0.425409	0.0995209	0.920725	0.957866
FvH4_1g03720	236.556	-0.698654	0.496826	-1.40623	0.159655	0.260231
FvH4_1g03730	350.376	-0.74283	0.34901	-2.12839	0.0333044	0.0744336
FvH4_1g03750	2.14857	-3.22456	1.95419	-1.65008	0.0989266	0.179018
FvH4_1g03760	1.46548	-1.98205	2.31575	-0.855899	0.392054	0.518265
FvH4_1g03770	32.3986	8.66496	1.31811	6.57376	4.90618e-11	7.48935e-10
FvH4_1g03790	48.8581	0.298162	0.650093	0.458645	0.646489	0.748476
FvH4_1g03800	5.15625	4.27979	1.20973	3.5378	0.000403474	0.00173439
FvH4_1g03810	1.22758	6.71316	4.91715	1.36525	0.172173	0.275865
FvH4_1g03830	1503.4	0.413743	0.318167	1.3004	0.193466	0.302291
FvH4_1g03840	313.597	-1.03775	0.316197	-3.28199	0.00103077	0.0039385
FvH4_1g03850	534.467	0.091325	0.418032	0.218464	0.827067	0.890825
FvH4_1g03860	1.86823	4.00127	1.50579	2.65726	0.00787785	0.0223787
FvH4_1g03880	422.779	-1.22034	0.689671	-1.76946	0.0768177	0.146223
FvH4_1g03900	84.811	-0.239675	0.573142	-0.418178	0.675817	0.772202
FvH4_1g03910	27.5947	6.22574	1.11548	5.58124	2.38808e-08	2.50406e-07
FvH4_1g03920	4717.67	-1.51686	0.444192	-3.41487	0.000638127	0.00259221
FvH4_1g03930	130.05	-1.35151	0.354034	-3.81744	0.000134841	0.000655375
FvH4_1g03950	259.256	-0.679512	0.2685	-2.53077	0.0113812	0.0304944
FvH4_1g03960	101.589	3.82286	0.524387	7.29014	3.0963e-13	6.22552e-12
FvH4_1g03970	110.312	2.03218	0.660672	3.07593	0.00209849	0.00725951
FvH4_1g03980	1821.28	-0.464886	0.392265	-1.18513	0.235965	0.35152
FvH4_1g03990	1200.28	-0.609042	0.248184	-2.45399	0.014128	0.0365721
FvH4_1g04000	38.5808	3.23856	0.867955	3.73125	0.000190531	0.000892969
FvH4_1g04010	423.193	1.11222	0.378551	2.93808	0.00330248	0.0106911
FvH4_1g04020	324.591	1.10589	0.6511	1.6985	0.0894144	0.164989
FvH4_1g04030	43.7327	0.371851	0.650222	0.571882	0.567402	0.682263
FvH4_1g04040	71.7086	-0.610446	0.360512	-1.69327	0.0904033	0.166464
FvH4_1g04050	126.819	-1.04069	1.41765	-0.734095	0.462891	0.586645
FvH4_1g04051	4.94075	0.830985	0.860727	0.965446	0.334321	0.459225
FvH4_1g04070	14.2252	7.59366	1.2823	5.9219	3.18238e-09	3.76328e-08
FvH4_1g04080	650.253	0.811107	0.793451	1.02225	0.306662	0.42915
FvH4_1g04090	57.9861	-0.260404	0.331813	-0.784792	0.432576	0.557616
FvH4_1g04091	4.93997	-3.72335	1.6401	-2.27019	0.0231958	0.0554092
FvH4_1g04100	13.7318	0.331937	0.784241	0.423259	0.672106	0.768963
FvH4_1g04110	18.755	0.40842	0.444524	0.918782	0.35821	0.484146
FvH4_1g04120	288.127	-0.846474	0.252173	-3.35672	0.000788735	0.00311967
FvH4_1g04130	32.3735	0.748901	0.558511	1.34089	0.179956	0.285166
FvH4_1g04140	12.0383	7.41739	1.33587	5.55249	2.81637e-08	2.91277e-07
FvH4_1g04150	201.153	2.55902	0.840118	3.04603	0.00231885	0.00791694
FvH4_1g04160	369.433	2.01621	0.312231	6.45744	1.0649e-10	1.55524e-09
FvH4_1g04170	861.199	0.337845	0.397144	0.850686	0.394944	0.520893
FvH4_1g04190	5.58248	1.63924	0.933112	1.75675	0.0789605	0.149472
FvH4_1g04210	403.727	2.92322	0.676159	4.32327	1.53735e-05	9.42781e-05
FvH4_1g04220	185.301	0.178663	0.248004	0.720405	0.471276	0.594693
FvH4_1g04230	386.437	-0.246913	0.1563	-1.57973	0.114168	0.200098
FvH4_1g04240	1.82922	2.47452	2.61222	0.947286	0.343493	0.469037
FvH4_1g04250	1051.13	1.43893	0.5528	2.60298	0.00924171	0.0255516
FvH4_1g04290	759.302	0.803395	0.664401	1.2092	0.226585	0.340852
FvH4_1g04310	1150.4	-0.783719	0.279148	-2.80754	0.00499219	0.0152668
FvH4_1g04320	238.409	-0.723556	0.389869	-1.85589	0.0634686	0.125326
FvH4_1g04330	182.355	0.162582	0.343778	0.472929	0.636264	0.740468
FvH4_1g04340	78.5272	0.536223	0.382029	1.40362	0.160432	0.261187
FvH4_1g04350	1823.08	-0.519409	0.621486	-0.835753	0.403294	0.529106
FvH4_1g04351	18.7063	-1.65856	0.609336	-2.72192	0.00649041	0.0190136
FvH4_1g04361	96.3173	-0.499431	0.501327	-0.996217	0.319145	0.442808
FvH4_1g04370	129.909	2.20236	0.330877	6.65613	2.81122e-11	4.40164e-10
FvH4_1g04380	10.2609	3.53529	1.11017	3.18445	0.00145028	0.00527234
FvH4_1g04401	19.2435	0.536149	0.787538	0.680792	0.496003	0.61792
FvH4_1g04420	612.411	-4.45033	0.534721	-8.32271	8.59724e-17	2.57635e-15
FvH4_1g04421	4.78579	0.291462	1.05018	0.277536	0.781369	0.856577
FvH4_1g04450	29.6715	-0.124004	0.56069	-0.221163	0.824966	0.889136
FvH4_1g04460	26.054	0.176095	0.407899	0.431713	0.66595	0.764351
FvH4_1g04490	504.211	0.0221269	0.257384	0.0859682	0.931492	0.964923
FvH4_1g04500	380.545	0.249155	0.512455	0.486199	0.626826	0.73275
FvH4_1g04510	177.286	1.5618	0.364852	4.28065	1.86348e-05	0.000112331
FvH4_1g04520	70.1674	0.558017	0.680064	0.820536	0.411911	0.538062
FvH4_1g04540	94.6376	1.78289	0.351618	5.07053	3.9671e-07	3.32711e-06
FvH4_1g04541	3.11641	-0.793883	1.23732	-0.641614	0.521124	0.640772
FvH4_1g04560	79.3356	0.125449	0.581624	0.215687	0.829232	0.89251
FvH4_1g04570	61.5403	2.74523	0.509353	5.38964	7.06005e-08	6.80744e-07
FvH4_1g04610	74.4484	-0.578971	0.502987	-1.15107	0.249705	0.367833
FvH4_1g04670	337.969	0.162386	0.181631	0.894044	0.371298	0.497271
FvH4_1g04680	235.623	0.942922	0.689806	1.36694	0.171645	0.275254
FvH4_1g04700	672.34	2.70104	0.561915	4.80685	1.5333e-06	1.15901e-05
FvH4_1g04710	194.092	-0.461643	0.227923	-2.02544	0.0428224	0.0914301
FvH4_1g04720	244.474	1.0269	0.522724	1.96452	0.0494698	0.102821
FvH4_1g04721	491.692	0.972444	0.325521	2.98735	0.00281407	0.00934021
FvH4_1g04740	8.43382	1.09637	1.03424	1.06008	0.289109	0.410028
FvH4_1g04750	36.5501	1.42532	0.366765	3.8862	0.000101828	0.000510674
FvH4_1g04760	2.71749	0	2.83371	0	1	1
FvH4_1g04770	3.88305	8.05122	1.97878	4.06878	4.72609e-05	0.00025905
FvH4_1g04790	1.30392	1.69481	1.59258	1.06419	0.287241	0.407959
FvH4_1g04800	12.4774	3.53	1.89325	1.86452	NA	NA
FvH4_1g04810	190.816	3.93947	0.887333	4.43967	9.00972e-06	5.81799e-05
FvH4_1g04820	117.614	0.404342	0.19544	2.06888	0.0385571	0.0839243
FvH4_1g04830	250.345	1.6456	0.366183	4.49394	6.99174e-06	4.61127e-05
FvH4_1g04840	8.68464	6.22069	1.51622	4.10277	4.08233e-05	0.000226996
FvH4_1g04841	92.1766	-2.64005	0.597014	-4.42209	9.77512e-06	6.2643e-05
FvH4_1g04850	6.27774	1.28181	0.734196	1.74587	0.0808334	0.152347
FvH4_1g04860	16.3177	-0.232927	1.37215	-0.169754	0.865204	0.918463
FvH4_1g04870	69.7151	-0.360528	0.483206	-0.746117	0.455597	0.579596
FvH4_1g04892	54.131	-0.551946	0.786639	-0.701651	0.482897	0.605477
FvH4_1g04910	4.56637	0.925815	1.06482	0.869457	0.384597	0.510933
FvH4_1g04920	14.509	-0.415708	0.980236	-0.42409	0.6715	0.76867
FvH4_1g04930	209.988	0.732227	0.358143	2.04451	0.0409032	0.0879747
FvH4_1g04931	3.09725	1.15705	1.12198	1.03125	0.302423	0.424736
FvH4_1g04940	820.199	-0.733034	0.205101	-3.57402	0.000351543	0.00153401
FvH4_1g04950	2878.15	-1.5648	0.508884	-3.07497	0.00210523	0.00727938
FvH4_1g04960	331.771	0.495305	0.223625	2.21489	0.0267678	0.0622869
FvH4_1g04970	306.902	-0.0331562	0.310958	-0.106626	0.915086	0.953602
FvH4_1g04980	62.3195	-0.0764161	0.511422	-0.149419	0.881223	0.92964
FvH4_1g04981	10.719	-0.893887	1.03624	-0.862626	0.388343	0.514974
FvH4_1g04982	154.274	0.949555	0.333416	2.84796	0.00440008	0.0136986
FvH4_1g04983	25.277	-1.27917	0.650982	-1.96498	0.0494165	0.102759
FvH4_1g04984	48.3833	0.443984	0.349277	1.27115	0.203675	0.313972
FvH4_1g04990	32.4088	-0.203157	0.568931	-0.357086	0.721027	0.808199
FvH4_1g04991	70.1427	1.34798	0.59652	2.25975	0.0238369	0.0566078
FvH4_1g05000	55.8288	-0.706995	0.51098	-1.38361	0.166479	0.268552
FvH4_1g05030	19.8117	0.639522	1.23389	0.518296	0.604252	0.714828
FvH4_1g05040	313.738	-2.0626	0.469551	-4.3927	1.1195e-05	7.07093e-05
FvH4_1g05050	675.742	-0.841261	0.249435	-3.37267	0.000744433	0.00296961
FvH4_1g05070	118.537	1.85296	0.694848	2.66672	0.00765961	0.0218493
FvH4_1g05080	19.0737	6.01748	0.905543	6.64516	3.02888e-11	4.71217e-10
FvH4_1g05090	5.23281	8.35233	1.89097	4.41697	1.00096e-05	6.394e-05
FvH4_1g05100	2.26438	5.43695	2.21785	2.45145	0.0142281	0.0367835
FvH4_1g05110	550.639	-1.15738	0.870959	-1.32885	0.183897	0.289942
FvH4_1g05120	37.4654	-1.00381	0.40899	-2.45436	0.0141136	0.0365435
FvH4_1g05130	34.5601	-2.2171	0.640844	-3.45966	0.000540849	0.00224189
FvH4_1g05140	2.01204	-3.51137	1.90931	-1.83908	0.0659032	0.129145
FvH4_1g05150	285.463	0.0572338	0.525384	0.108937	0.913253	0.952325
FvH4_1g05170	1358.24	0.123328	0.303263	0.40667	0.684251	0.778715
FvH4_1g05180	4910.12	1.64377	0.930549	1.76645	0.0773207	0.147027
FvH4_1g05181	426.043	-0.871922	0.489239	-1.7822	0.0747166	0.142955
FvH4_1g05220	9.33445	9.61448	2.33652	4.11486	3.87406e-05	0.000216516
FvH4_1g05240	902.156	0.471593	0.32491	1.45146	0.146653	0.24371
FvH4_1g05260	25.9644	-2.56586	0.864127	-2.96931	0.00298472	0.00983246
FvH4_1g05270	536.73	0.895147	0.320544	2.79259	0.00522879	0.0158774
FvH4_1g05280	629.953	1.01376	0.36139	2.80516	0.00502914	0.0153691
FvH4_1g05300	0.844091	2.38164	2.61659	0.910207	0.362713	NA
FvH4_1g05310	205.167	4.86728	0.457626	10.636	2.02742e-26	1.63505e-24
FvH4_1g05320	449.834	4.82669	0.41058	11.7558	6.59515e-32	8.56042e-30
FvH4_1g05350	827.909	-1.29755	0.394819	-3.28644	0.00101461	0.00388487
FvH4_1g05360	93.1703	1.10712	0.268727	4.11988	3.79065e-05	0.000212393
FvH4_1g05370	413.57	0.282248	0.78753	0.358396	0.720047	0.807472
FvH4_1g05371	14.7895	-1.08869	0.736427	-1.47834	0.139316	0.234089
FvH4_1g05380	60.8527	0.305575	0.612663	0.498766	0.617944	0.725965
FvH4_1g05390	3.13705	1.30285	1.38958	0.937588	0.348456	0.47403
FvH4_1g05400	2178.05	6.82991	1.98834	3.43498	0.000592595	0.00243157
FvH4_1g05410	38.5035	1.62784	0.605082	2.69028	0.00713919	0.0205951
FvH4_1g05440	5.61098	2.11373	1.1438	1.84799	0.0646041	0.127122
FvH4_1g05450	730.329	0.982148	0.562262	1.74678	0.0806755	0.152092
FvH4_1g05460	676.708	-0.936701	0.18872	-4.96343	6.92578e-07	5.58749e-06
FvH4_1g05470	20.4627	2.04557	0.439825	4.65088	3.30521e-06	2.33429e-05
FvH4_1g05480	3260.69	-0.433216	0.25918	-1.67148	0.0946262	0.17266
FvH4_1g05520	90.3057	0.546697	0.483415	1.13091	0.258095	0.376835
FvH4_1g05530	60.7855	-2.37856	1.37768	-1.7265	0.0842566	0.157486
FvH4_1g05540	96.669	2.05921	0.602836	3.41588	0.000635766	0.00258571
FvH4_1g05550	63.3128	-0.453485	0.327238	-1.38579	0.16581	0.267816
FvH4_1g05561	1.29248	1.34928	1.89798	0.710903	0.477144	0.600358
FvH4_1g05600	28.5047	-0.0382709	0.628104	-0.0609308	0.951414	0.978066
FvH4_1g05630	706.155	-1.23858	0.318067	-3.89408	9.85715e-05	0.000495818
FvH4_1g05640	172.004	-1.53333	0.679113	-2.25785	0.023955	0.056839
FvH4_1g05650	988.426	3.36025	0.239901	14.0068	1.4166e-44	5.01201e-42
FvH4_1g05670	13.4841	2.1084	1.70773	1.23462	NA	NA
FvH4_1g05680	907.104	-0.00502328	0.247414	-0.0203031	0.983802	0.998951
FvH4_1g05690	38.3324	0.469872	0.421947	1.11358	0.26546	0.384588
FvH4_1g05700	2.40062	0.250128	1.30597	0.191527	0.848112	0.906268
FvH4_1g05710	123.508	-1.90842	0.359334	-5.31099	1.09029e-07	1.01213e-06
FvH4_1g05730	671.791	1.95014	0.376697	5.17694	2.25552e-07	1.97988e-06
FvH4_1g05740	443.879	-0.0569292	0.205332	-0.277255	0.781584	0.856702
FvH4_1g05750	1.7904	3.12372	1.32982	2.34898	0.0188252	0.0465977
FvH4_1g05760	410.002	-0.91591	0.261271	-3.5056	0.000455586	0.00193153
FvH4_1g05770	78.7572	5.71932	0.793191	7.21052	5.57387e-13	1.0849e-11
FvH4_1g05780	126.072	2.74056	0.346486	7.90958	2.5826e-15	6.58742e-14
FvH4_1g05790	140.597	-0.279895	0.449598	-0.622545	0.533584	0.652086
FvH4_1g05800	274.454	-0.329089	0.297747	-1.10526	0.269046	0.388557
FvH4_1g05810	40.3322	1.15928	0.507115	2.28602	0.0222528	0.0535356
FvH4_1g05820	133.974	-0.279283	0.377438	-0.739944	0.459334	0.583201
FvH4_1g05831	0.713171	0.50883	3.60586	0.141112	0.887781	NA
FvH4_1g05840	37.2287	1.55559	0.49071	3.17009	0.00152393	0.00549909
FvH4_1g05850	1258.51	-0.331739	0.297703	-1.11433	0.265139	0.384273
FvH4_1g05870	1005.88	0.817329	0.300408	2.72073	0.00651374	0.0190618
FvH4_1g05880	772.198	-0.470696	0.223771	-2.10348	0.0354241	0.0783883
FvH4_1g05910	132.112	-0.253962	0.234483	-1.08307	0.278776	0.398907
FvH4_1g05950	49.649	3.17165	0.597257	5.31036	1.09409e-07	1.01523e-06
FvH4_1g05960	157.976	7.17221	0.813805	8.81318	1.2165e-18	4.41806e-17
FvH4_1g05970	225.057	0.670278	0.309773	2.16377	0.0304821	0.0691974
FvH4_1g05980	36.8657	1.81566	0.692978	2.62009	0.00879071	0.0244992
FvH4_1g05990	6.62315	4.44063	1.37664	3.22571	0.00125659	0.00466564
FvH4_1g06000	4539.95	-4.33118	0.423818	-10.2194	1.62304e-24	1.06278e-22
FvH4_1g06010	379.869	-2.07836	0.440679	-4.71627	2.40207e-06	1.74361e-05
FvH4_1g06040	171.355	0.969894	0.369292	2.62636	0.0086303	0.0241257
FvH4_1g06050	1.07151	0.185093	3.03985	0.060889	0.951448	0.978066
FvH4_1g06060	7.82412	0.285899	0.688744	0.415102	0.678067	0.773805
FvH4_1g06070	81.3807	0.111298	0.309477	0.359632	0.719122	0.806682
FvH4_1g06080	6.68836	-2.84386	1.25638	-2.26353	0.0236028	0.0561828
FvH4_1g06090	394.75	-1.56649	0.468052	-3.34682	0.000817438	0.00321984
FvH4_1g06100	89.6059	-1.35334	0.526597	-2.56998	0.0101704	0.0277485
FvH4_1g06110	259.198	-1.70654	0.289298	-5.89889	3.65962e-09	4.30211e-08
FvH4_1g06140	2.55723	-1.08996	2.05522	-0.530341	0.595876	0.707816
FvH4_1g06150	80.585	1.2547	0.437085	2.87061	0.00409678	0.012886
FvH4_1g06170	356.705	1.07965	0.641412	1.68323	0.0923299	0.16923
FvH4_1g06180	40.3138	1.96762	0.469306	4.1926	2.7577e-05	0.000159654
FvH4_1g06210	4.85113	4.05421	1.51263	2.68024	0.00735704	0.021118
FvH4_1g06220	99.6181	7.98565	0.764941	10.4396	1.63575e-25	1.21222e-23
FvH4_1g06231	14.3581	6.12213	1.67054	3.66476	0.000247573	0.00112391
FvH4_1g06250	5.81641	2.22973	1.16814	1.90878	0.0562906	0.1141
FvH4_1g06260	23.8484	4.18806	0.522486	8.01565	1.09559e-15	2.90252e-14
FvH4_1g06261	5.92538	3.7795	0.825573	4.57803	4.69386e-06	3.21965e-05
FvH4_1g06270	1524.98	0.286709	0.333411	0.859927	0.389829	0.516289
FvH4_1g06280	45.2019	-3.89676	1.14648	-3.3989	0.000676577	0.0027287
FvH4_1g06290	21.0502	9.82744	4.49753	2.18507	0.0288834	0.0663649
FvH4_1g06300	33.8458	3.77666	0.693119	5.44879	5.07132e-08	5.02686e-07
FvH4_1g06301	2.3095	1.0086	1.41763	0.711473	0.476791	0.599948
FvH4_1g06302	2.72404	0.732572	1.39726	0.524294	0.600074	0.711638
FvH4_1g06330	235.353	1.12862	0.305051	3.69979	0.000215781	0.000999427
FvH4_1g06340	4.44079	7.0059	2.10553	3.32739	0.000876642	0.00341867
FvH4_1g06350	5.42044	5.1468	1.27798	4.02729	5.64223e-05	0.000302537
FvH4_1g06360	257.005	1.53248	0.403887	3.79433	0.00014804	0.000712621
FvH4_1g06361	13.4597	1.14271	0.776018	1.47253	0.140879	0.236005
FvH4_1g06370	18.5224	1.11833	0.522808	2.13908	0.0324289	0.0727883
FvH4_1g06390	3463.37	-2.55067	0.653024	-3.90594	9.38605e-05	0.000474625
FvH4_1g06400	785.026	-0.228777	0.352345	-0.649296	0.516147	0.636364
FvH4_1g06420	4.62682	0.211616	0.828824	0.255321	0.798475	0.869162
FvH4_1g06430	12.4121	-0.572903	0.645214	-0.887927	0.37458	0.500352
FvH4_1g06440	114.217	-0.669135	0.447194	-1.49629	0.134577	0.227607
FvH4_1g06450	7.96353	0.595726	1.60303	0.371626	0.710171	0.799257
FvH4_1g06461	4887.96	-2.41246	0.518188	-4.65558	3.23077e-06	2.28466e-05
FvH4_1g06480	482.596	-1.69912	0.399922	-4.24864	2.15073e-05	0.000128063
FvH4_1g06490	85.5578	-0.313324	0.45007	-0.696166	0.486325	0.609183
FvH4_1g06500	260.696	0.517495	0.28196	1.83535	0.0664541	0.130016
FvH4_1g06510	48.0061	1.70613	0.604177	2.82389	0.00474448	0.014605
FvH4_1g06520	879.516	-0.73957	0.140035	-5.28132	1.28259e-07	1.17572e-06
FvH4_1g06530	39.4856	2.96826	0.789412	3.7601	0.000169848	0.000804356
FvH4_1g06540	444.576	-1.62884	0.41568	-3.91849	8.91056e-05	0.000454351
FvH4_1g06560	7.53641	9.23377	2.319	3.98179	6.83985e-05	0.000358688
FvH4_1g06570	246.478	1.24147	0.235315	5.27577	1.32197e-07	1.20787e-06
FvH4_1g06580	293.331	-1.21112	0.309547	-3.91258	9.13171e-05	0.000463581
FvH4_1g06610	1173.9	-1.61326	0.426013	-3.78687	0.000152556	0.000730991
FvH4_1g06620	190.611	0.809037	0.364951	2.21684	0.0266343	0.0620222
FvH4_1g06630	92.812	0.463125	1.01986	0.454107	0.649752	0.751022
FvH4_1g06640	296.693	4.81335	0.683588	7.0413	1.90448e-12	3.4727e-11
FvH4_1g06670	1.72314	5.93801	2.55592	2.32324	0.0201661	0.0493215
FvH4_1g06690	114.739	-0.17365	0.498513	-0.348336	0.727588	0.813309
FvH4_1g06700	42.8756	-2.33831	0.515245	-4.53824	5.67252e-06	3.81695e-05
FvH4_1g06710	121.727	-4.25112	0.712249	-5.96859	2.39312e-09	2.88913e-08
FvH4_1g06720	2224.64	-1.43925	0.185291	-7.76747	8.00688e-15	1.94938e-13
FvH4_1g06730	277.094	0.171966	0.372821	0.461255	0.644615	0.746938
FvH4_1g06740	227.085	-1.553	0.716627	-2.16709	0.0302277	0.0687552
FvH4_1g06750	1.6337	1.03158	1.59159	0.648146	0.51689	0.637138
FvH4_1g06760	160.863	1.831	0.547064	3.34697	0.000817014	0.00321876
FvH4_1g06761	37.1459	0.960786	0.556103	1.72771	0.0840398	0.157188
FvH4_1g06762	38.358	0.549042	0.347089	1.58185	0.113684	0.199581
FvH4_1g06763	8.50682	0.47016	0.681351	0.69004	0.490169	0.612649
FvH4_1g06770	0.811784	-1.5995	2.17192	-0.736446	0.461459	NA
FvH4_1g06780	2503.26	-1.89011	0.631178	-2.99458	0.00274821	0.0091493
FvH4_1g06790	102.891	0.65626	0.237567	2.76242	0.00573747	0.0171211
FvH4_1g06800	37.6446	1.94574	0.659718	2.94936	0.00318437	0.0103715
FvH4_1g06810	214.498	-0.931577	0.416621	-2.23603	0.0253498	0.0595623
FvH4_1g06820	1450.16	-1.33592	0.323149	-4.13405	3.56423e-05	0.00020099
FvH4_1g06830	106.42	0.205567	0.321673	0.639057	0.522786	0.642312
FvH4_1g06840	1.68883	2.62713	2.26489	1.15994	0.246075	0.363661
FvH4_1g06841	536.85	-2.78347	0.752253	-3.70018	0.000215449	0.00099833
FvH4_1g06850	141.735	5.50131	0.935209	5.88245	4.04249e-09	4.72435e-08
FvH4_1g06851	1.57459	-2.53646	2.89428	-0.876369	0.38083	0.50691
FvH4_1g06860	413.609	-2.31452	0.558176	-4.14658	3.37477e-05	0.000191586
FvH4_1g06870	192.506	1.69076	0.309787	5.45781	4.82055e-08	4.79346e-07
FvH4_1g06910	216.261	3.37371	0.614543	5.4898	4.024e-08	4.06215e-07
FvH4_1g06920	14.4798	10.2622	4.8943	2.09676	0.0360147	0.0795026
FvH4_1g06930	82.6422	0.0449935	0.40677	0.110612	0.911924	0.951347
FvH4_1g06940	1073.78	-0.922528	0.445556	-2.07051	0.0384044	0.0836416
FvH4_1g06970	916.272	-1.26308	0.406457	-3.10754	0.00188652	0.00661066
FvH4_1g06990	585.803	-1.16921	0.370429	-3.15638	0.00159741	0.00572654
FvH4_1g07000	1061.46	-1.02999	0.428086	-2.40604	0.0161264	0.0407874
FvH4_1g07030	103.057	0.317743	0.316055	1.00534	0.314732	0.438208
FvH4_1g07040	77.6856	0.925773	0.382147	2.42256	0.0154117	0.0392879
FvH4_1g07041	14.0564	1.06935	0.979442	1.09179	0.274924	0.394941
FvH4_1g07060	260.014	-0.610451	0.191158	-3.19343	0.00140594	0.00513242
FvH4_1g07061	1.48161	-1.37907	2.48711	-0.554487	0.579246	0.693199
FvH4_1g07062	66.7474	-1.84807	0.577395	-3.2007	0.00137092	0.00502129
FvH4_1g07063	1.0985	0	4.00971	0	1	1
FvH4_1g07070	5.07495	-1.02448	1.28599	-0.796648	0.425655	0.551158
FvH4_1g07071	33.1531	1.27609	0.473223	2.69659	0.00700536	0.0202864
FvH4_1g07080	42.7185	-1.48543	1.07434	-1.38264	0.166776	0.26892
FvH4_1g07090	145.137	0.131162	0.334022	0.392674	0.69456	0.786855
FvH4_1g07100	77.6939	-0.43171	0.412703	-1.04605	0.295536	0.416906
FvH4_1g07110	67.6691	0.136696	0.279851	0.488459	0.625225	0.73158
FvH4_1g07120	24.2286	1.50396	0.43258	3.47671	0.0005076	0.00211928
FvH4_1g07130	101.772	1.55669	0.297927	5.22507	1.74093e-07	1.56128e-06
FvH4_1g07140	370.848	-0.480479	0.361103	-1.33059	0.183326	0.289353
FvH4_1g07150	74.6148	2.18104	0.643182	3.39102	0.000696337	0.00279708
FvH4_1g07151	217.26	-0.378011	0.660005	-0.572739	0.566821	0.681789
FvH4_1g07160	817.376	-2.25031	0.567096	-3.96813	7.24384e-05	0.000377437
FvH4_1g07170	253.218	10.4284	1.01823	10.2416	1.29036e-24	8.55147e-23
FvH4_1g07180	91.3706	-1.06873	0.405692	-2.63435	0.00842988	0.0236619
FvH4_1g07181	34.9087	-8.8629	1.51731	-5.84119	5.18308e-09	5.95216e-08
FvH4_1g07200	2.49975	-1.98093	1.61629	-1.2256	0.220348	0.333302
FvH4_1g07210	203.581	-1.73228	0.205753	-8.41926	3.78879e-17	1.17058e-15
FvH4_1g07220	91.9709	0.385357	0.449073	0.858116	0.390829	0.517113
FvH4_1g07230	160.987	-0.0523469	0.617612	-0.084757	0.932455	0.965392
FvH4_1g07231	6.26637	0.598431	0.958143	0.624574	0.532251	0.651023
FvH4_1g07240	152.198	-1.8783	0.355828	-5.27867	1.30125e-07	1.19182e-06
FvH4_1g07250	84.056	-0.584395	0.43048	-1.35754	0.174609	0.278906
FvH4_1g07270	189.375	2.89756	0.279651	10.3614	3.71649e-25	2.61298e-23
FvH4_1g07280	350.488	0.673952	0.270002	2.4961	0.0125567	0.0330902
FvH4_1g07290	710.167	-0.412062	0.32914	-1.25194	0.210593	0.322079
FvH4_1g07300	497.965	-0.96288	0.603597	-1.59524	0.110659	0.195256
FvH4_1g07320	60.0621	1.78438	0.518386	3.44218	0.00057705	0.00237534
FvH4_1g07340	183.916	-0.408492	0.498239	-0.819872	0.412289	0.538331
FvH4_1g07350	0.507069	-2.01016	3.08003	-0.652641	0.513988	NA
FvH4_1g07370	75.2251	3.68603	0.332198	11.0959	1.31337e-28	1.30955e-26
FvH4_1g07380	23.0864	-0.389298	0.726819	-0.535619	0.592222	0.704744
FvH4_1g07390	165.19	11.8804	3.38647	3.50821	0.000451131	0.00191635
FvH4_1g07401	1408.5	3.18638	0.702856	4.53347	5.80216e-06	3.8982e-05
FvH4_1g07410	95.6986	2.28972	0.275455	8.3125	9.37029e-17	2.79275e-15
FvH4_1g07420	18.3837	-0.410096	0.509179	-0.805406	0.420586	0.546303
FvH4_1g07430	16.8068	-2.79692	0.927255	-3.01634	0.00255846	0.0086236
FvH4_1g07432	7.10659	-1.01998	0.914803	-1.11497	0.264861	0.384031
FvH4_1g07450	147.421	8.7581	0.777532	11.264	1.97616e-29	2.12496e-27
FvH4_1g07480	26.9281	3.34167	0.596833	5.599	2.15589e-08	2.27363e-07
FvH4_1g07500	388.005	0.32261	0.151243	2.13305	0.0329202	0.0737327
FvH4_1g07510	487.325	-0.976621	0.307056	-3.1806	0.00146971	0.00533149
FvH4_1g07520	256.207	-0.0937691	0.192221	-0.48782	0.625677	0.731936
FvH4_1g07530	403.876	0.990434	0.763378	1.29744	0.194481	0.303343
FvH4_1g07540	145.797	-0.096326	0.326656	-0.294885	0.768081	0.84573
FvH4_1g07560	40.4872	2.6434	0.632685	4.17807	2.93998e-05	0.000168958
FvH4_1g07600	706.536	-0.428788	0.399813	-1.07247	0.283509	0.404149
FvH4_1g07620	11.2119	2.2367	1.47907	1.51223	0.130475	0.222005
FvH4_1g07640	101.458	0.71091	0.288154	2.46712	0.0136206	0.0354931
FvH4_1g07650	199.187	-1.61214	0.474038	-3.40087	0.000671721	0.0027126
FvH4_1g07670	5.5895	-0.704286	0.839138	-0.839297	0.401303	0.527156
FvH4_1g07671	91.182	-0.464968	0.810475	-0.573699	0.566172	0.681307
FvH4_1g07680	2.25389	2.65983	1.75173	1.5184	0.128913	0.219946
FvH4_1g07690	284.622	-0.625397	0.666059	-0.938951	0.347756	0.4734
FvH4_1g07700	114.891	0.218549	0.511115	0.427592	0.668948	0.766709
FvH4_1g07710	2.02201	3.19613	1.95673	1.63341	0.102383	0.183967
FvH4_1g07730	60.4116	-0.797768	0.404145	-1.97396	0.0483858	0.10097
FvH4_1g07740	1305.81	-1.183	0.300169	-3.94112	8.11009e-05	0.000417025
FvH4_1g07750	235.112	-0.0968266	0.225937	-0.428555	0.668247	0.766266
FvH4_1g07760	1.66137	1.0733	2.97527	0.36074	0.718294	0.805998
FvH4_1g07770	100.898	0.713403	0.387008	1.84338	0.0652732	0.128182
FvH4_1g07790	19.6089	0.609013	0.567035	1.07403	0.282808	0.403308
FvH4_1g07800	38.9729	-4.08503	0.858942	-4.75589	1.97572e-06	1.45777e-05
FvH4_1g07820	67.4177	-1.44246	0.738679	-1.95275	0.0508486	0.105095
FvH4_1g07830	26.2894	3.33529	0.845478	3.94485	7.98494e-05	0.000411458
FvH4_1g07860	921.653	0.49582	0.124702	3.97606	7.00673e-05	0.000366321
FvH4_1g07870	1.20202	4.83735	2.59418	1.86469	0.0622245	0.123447
FvH4_1g07880	7.28841	0.0495464	0.802549	0.0617363	0.950773	0.977473
FvH4_1g07900	73.007	1.08749	0.396225	2.74462	0.00605812	0.0179558
FvH4_1g07910	172.622	-0.325034	0.371554	-0.874795	0.381685	0.507772
FvH4_1g07920	714.652	-1.3837	0.422084	-3.27825	0.00104453	0.00398246
FvH4_1g07921	153.277	0.536878	0.238063	2.25519	0.0241212	0.0571593
FvH4_1g07930	780.396	-1.0247	0.330371	-3.10168	0.00192426	0.00672785
FvH4_1g07940	244.108	0.253373	0.396291	0.639361	0.522588	0.642104
FvH4_1g07950	191.602	3.68074	0.495397	7.42988	1.08696e-13	2.33532e-12
FvH4_1g07960	732.789	-1.25866	0.566393	-2.22224	0.0262672	0.061291
FvH4_1g07970	222.746	-1.00568	0.289072	-3.47899	0.000503309	0.00210297
FvH4_1g07980	85.5299	2.20271	0.463109	4.75636	1.97119e-06	1.45491e-05
FvH4_1g07981	318.048	-1.39671	0.855417	-1.63278	0.102515	0.184159
FvH4_1g07990	130.114	-1.80037	0.459798	-3.91556	9.01929e-05	0.000459329
FvH4_1g08000	415.669	1.03114	0.383876	2.68613	0.0072285	0.0208144
FvH4_1g08010	45.1785	1.41393	0.383575	3.68618	0.000227646	0.00104535
FvH4_1g08020	308.34	-0.332184	0.223443	-1.48666	0.137104	0.231072
FvH4_1g08030	19.416	2.53955	0.786539	3.22877	0.00124324	0.00462546
FvH4_1g08040	33.1048	1.50847	0.480334	3.14047	0.00168676	0.00600858
FvH4_1g08050	277.806	-0.907139	0.274876	-3.30018	0.000966232	0.00372173
FvH4_1g08060	156.242	0.677458	0.456158	1.48514	0.137507	0.231618
FvH4_1g08061	86.6812	0.119728	0.309676	0.386623	0.699035	0.79017
FvH4_1g08080	41.5119	3.11541	1.13998	2.73287	0.00627843	0.0184914
FvH4_1g08090	1572.03	0.116783	0.283798	0.411502	0.680705	0.776129
FvH4_1g08100	192.441	-4.04205	0.829897	-4.87054	1.11292e-06	8.65406e-06
FvH4_1g08110	484.065	0.446483	0.639397	0.698288	0.484997	0.607729
FvH4_1g08120	397.902	-0.674999	0.284399	-2.37342	0.0176241	0.0440674
FvH4_1g08130	203.854	1.1788	0.314423	3.7491	0.000177474	0.000836498
FvH4_1g08140	131.77	0.891389	0.329588	2.70455	0.00683962	0.0198852
FvH4_1g08141	684.545	-0.30189	0.576534	-0.523629	0.600536	0.712056
FvH4_1g08150	478.749	-0.659158	0.411817	-1.60061	0.109464	0.193676
FvH4_1g08160	161.482	2.05844	0.839792	2.45113	0.014241	0.0368081
FvH4_1g08180	394.905	1.63363	0.355778	4.59173	4.39594e-06	3.02476e-05
FvH4_1g08190	49.4097	0.689039	0.44892	1.53488	0.124812	0.214534
FvH4_1g08230	7.70401	1.68857	1.12739	1.49778	0.134191	0.227131
FvH4_1g08240	1051.42	-0.565033	0.214893	-2.62937	0.00855434	0.0239469
FvH4_1g08250	186.401	-1.12802	0.613352	-1.8391	0.0659003	0.129145
FvH4_1g08260	162.374	0.0585951	0.199642	0.293501	0.769139	0.84664
FvH4_1g08261	212.515	2.09488	0.248551	8.42837	3.50509e-17	1.09061e-15
FvH4_1g08280	156.201	0.370537	0.351644	1.05373	0.292007	0.413175
FvH4_1g08281	36.651	0.485502	0.331761	1.46341	0.143356	0.239315
FvH4_1g08290	13.1232	0.536217	1.70598	0.314317	0.75328	0.833743
FvH4_1g08300	2859.1	-0.6452	0.525214	-1.22845	0.219277	0.332141
FvH4_1g08310	80.0428	7.37883	0.96029	7.68396	1.54246e-14	3.64212e-13
FvH4_1g08320	157.028	0.450188	0.407408	1.10501	0.269157	0.388666
FvH4_1g08340	1.2088	0	5.10037	0	1	1
FvH4_1g08350	303.849	0.273394	0.621549	0.439859	0.660039	0.759873
FvH4_1g08360	95.669	1.66782	0.450795	3.69974	0.000215823	0.000999427
FvH4_1g08370	54.0138	-0.470898	0.529134	-0.889941	0.373498	0.499408
FvH4_1g08390	8.49308	-1.37287	0.910292	-1.50816	0.131513	0.223374
FvH4_1g08400	171.546	-1.53274	0.656027	-2.33639	0.0194708	0.0478986
FvH4_1g08410	2.93493	-3.63869	1.95342	-1.86273	0.0625001	0.123893
FvH4_1g08420	200.798	-0.780151	0.380105	-2.05246	0.0401248	0.0866743
FvH4_1g08430	379.752	0.235277	0.303845	0.774333	0.438734	0.563467
FvH4_1g08440	10.513	3.35069	1.01399	3.30445	0.000951626	0.00367131
FvH4_1g08450	460.128	1.24653	0.319523	3.90122	9.57083e-05	0.000482967
FvH4_1g08451	16.8744	1.90796	0.697571	2.73514	0.00623529	0.0183989
FvH4_1g08452	21.2545	0.932904	0.657421	1.41904	0.155889	0.255497
FvH4_1g08453	4.66982	1.53165	2.02997	0.754517	0.450539	0.574627
FvH4_1g08454	23.8986	3.45982	1.22791	2.81765	0.00483772	0.0148545
FvH4_1g08510	717.305	-0.164677	0.411324	-0.400358	0.688893	0.782415
FvH4_1g08530	0.950047	3.31342	5.06888	0.65368	0.513318	0.633963
FvH4_1g08531	901.94	15.2605	1.26835	12.0317	2.42123e-33	3.51736e-31
FvH4_1g08540	625.381	15.6861	2.17972	7.19642	6.18158e-13	1.19471e-11
FvH4_1g08541	1.87588	-0.0839412	1.2744	-0.0658673	0.947483	0.975271
FvH4_1g08550	2.50086	2.20991	1.37616	1.60585	0.108307	0.192078
FvH4_1g08570	2.71937	0.0122974	1.30575	0.00941786	0.992486	1
FvH4_1g08580	31.5923	0.0142811	0.788664	0.018108	0.985553	0.999978
FvH4_1g08590	322.763	-0.120556	0.230437	-0.523164	0.60086	0.712288
FvH4_1g08600	172.967	0.463984	0.354223	1.30986	0.190243	0.297976
FvH4_1g08610	24.0282	-0.414375	0.4386	-0.944768	0.344777	0.470192
FvH4_1g08620	113.938	1.5568	0.315314	4.9373	7.92125e-07	6.33008e-06
FvH4_1g08630	109.364	-0.0999016	0.503403	-0.198452	0.842691	0.902425
FvH4_1g08640	106.577	1.18709	0.385332	3.08068	0.00206528	0.00715928
FvH4_1g08650	182	0.390593	0.301916	1.29371	0.195764	0.304926
FvH4_1g08660	22.4589	3.14467	0.790811	3.97652	6.99322e-05	0.000365864
FvH4_1g08670	30.0685	0.308168	0.527799	0.583874	0.559305	0.675217
FvH4_1g08690	134.065	-0.195395	0.244083	-0.800526	0.423406	0.548991
FvH4_1g08691	32.7253	-0.986597	0.437112	-2.25708	0.0240031	0.0569224
FvH4_1g08700	28.0191	-0.0969953	0.523413	-0.185313	0.852983	0.909849
FvH4_1g08701	8.22806	-0.32203	0.772367	-0.416939	0.676723	0.772794
FvH4_1g08730	329.437	0.229235	0.390109	0.587618	0.556789	0.672932
FvH4_1g08750	10.5	-0.040543	0.651766	-0.0622048	0.9504	0.977264
FvH4_1g08760	8649.12	0.723538	0.389074	1.85964	0.0629364	0.124511
FvH4_1g08770	20.1178	4.87498	0.726092	6.71399	1.8937e-11	3.01891e-10
FvH4_1g08780	4.15356	8.46027	4.56952	1.85146	0.0641036	0.126288
FvH4_1g08790	12.8199	9.12143	1.89772	4.80651	1.53586e-06	1.16055e-05
FvH4_1g08840	3041.36	-1.18537	0.504077	-2.35158	0.0186941	0.046315
FvH4_1g08850	1.48223	-2.40088	2.29694	-1.04525	0.295906	0.417186
FvH4_1g08870	30.416	-2.99294	1.5492	-1.93192	0.0533692	0.109289
FvH4_1g08880	237.726	0.364136	0.306475	1.18814	0.234777	0.350294
FvH4_1g08890	5185.84	-2.40058	0.185205	-12.9618	2.01553e-38	4.13203e-36
FvH4_1g08900	28.5127	1.64355	0.724876	2.26735	0.0233686	0.055725
FvH4_1g08910	62.9966	4.85192	0.628864	7.71538	1.20626e-14	2.87301e-13
FvH4_1g08920	55.4565	-0.181806	0.316683	-0.574094	0.565904	0.681097
FvH4_1g08930	1.67061	1.27709	1.61295	0.791771	0.428494	0.553854
FvH4_1g08940	2396.42	-1.11337	0.2494	-4.46421	8.03649e-06	5.23888e-05
FvH4_1g08950	199.801	1.32426	0.234172	5.6551	1.55759e-08	1.67569e-07
FvH4_1g08960	52.1376	0.337882	0.481791	0.701305	0.483113	0.605713
FvH4_1g08970	44.7759	-1.05233	0.584516	-1.80034	0.0718067	0.138511
FvH4_1g08980	0.91642	-1.1331	2.90478	-0.39008	0.696477	0.788294
FvH4_1g09010	113.447	-0.622461	0.393626	-1.58135	0.113798	0.199685
FvH4_1g09020	624.669	-0.855636	0.323319	-2.64641	0.00813501	0.0229751
FvH4_1g09021	1.4079	0.158956	2.62511	0.0605524	0.951716	0.978121
FvH4_1g09040	196.235	12.1579	1.29948	9.35598	8.28306e-21	3.84138e-19
FvH4_1g09050	481.378	0.425719	0.327582	1.29958	0.193746	0.302599
FvH4_1g09070	1142.75	4.15802	0.510243	8.14911	3.6661e-16	1.02315e-14
FvH4_1g09080	468.069	0.783384	0.43762	1.7901	0.0734376	0.141
FvH4_1g09090	221.438	0.461658	0.462127	0.998986	0.317802	0.441544
FvH4_1g09100	12.0193	-7.10521	1.52896	-4.64709	3.36657e-06	2.37152e-05
FvH4_1g09110	83.4465	-0.425027	0.446802	-0.951264	0.34147	0.467105
FvH4_1g09130	135.892	0.871129	0.404676	2.15266	0.0313456	0.0708059
FvH4_1g09140	211.396	-0.87973	0.376602	-2.33597	0.0194929	0.0479369
FvH4_1g09150	497.874	0.339729	0.71764	0.473397	0.63593	0.740236
FvH4_1g09160	1273.04	0.754346	0.503956	1.49685	0.134433	0.227428
FvH4_1g09180	130.071	-1.40495	0.816377	-1.72096	0.0852583	0.158911
FvH4_1g09190	413.714	2.0692	1.36084	1.52053	0.128379	0.219255
FvH4_1g09200	3339.65	-0.490282	0.414364	-1.18321	0.236724	0.352411
FvH4_1g09210	942.567	-0.15915	0.201662	-0.789194	0.429998	0.555384
FvH4_1g09220	489.621	2.2907	0.557526	4.10869	3.97905e-05	0.000221759
FvH4_1g09230	28.1775	3.66506	0.883926	4.14634	3.37833e-05	0.000191689
FvH4_1g09250	326.43	3.51499	0.447051	7.86262	3.76171e-15	9.39828e-14
FvH4_1g09251	21.0503	0.0559729	0.646515	0.0865763	0.931008	0.964604
FvH4_1g09260	125.786	-1.25304	0.425014	-2.94822	0.00319606	0.0103988
FvH4_1g09270	3.49166	-0.234696	1.05622	-0.222205	0.824155	0.888517
FvH4_1g09280	5.62083	0.148544	0.870304	0.17068	0.864475	0.917778
FvH4_1g09290	0.80866	-1.8162	2.18072	-0.832845	0.404932	NA
FvH4_1g09300	4440.74	-8.96853	0.884101	-10.1442	3.51495e-24	2.24139e-22
FvH4_1g09310	679.787	0.0937191	0.463099	0.202374	0.839625	0.900284
FvH4_1g09330	4.49582	-0.518191	1.2232	-0.423636	0.671831	0.76885
FvH4_1g09360	1976.61	1.74545	0.62349	2.79948	0.00511848	0.0156008
FvH4_1g09380	12.3993	3.33853	0.844093	3.95517	7.64818e-05	0.000395965
FvH4_1g09390	760.422	-1.4427	0.294062	-4.90611	9.29006e-07	7.3331e-06
FvH4_1g09400	1203.3	0.418459	0.262939	1.59147	0.111504	0.196446
FvH4_1g09440	338.277	0.794376	0.408837	1.94301	0.0520147	0.107005
FvH4_1g09450	283.9	0.125515	0.312557	0.401575	0.687997	0.781761
FvH4_1g09453	3.46222	4.54522	1.37095	3.31538	0.000915196	0.00354946
FvH4_1g09454	39.7236	-2.75021	0.555678	-4.94929	7.44854e-07	5.9719e-06
FvH4_1g09500	71.2254	6.80434	1.08523	6.26993	3.61205e-10	4.83429e-09
FvH4_1g09520	6.07155	-0.0474921	1.872	-0.0253697	0.97976	0.996385
FvH4_1g09530	769.057	1.08265	0.526016	2.05821	0.0395698	0.0856949
FvH4_1g09540	271.484	0.184792	0.194153	0.951787	0.341205	0.466916
FvH4_1g09550	75.0456	-0.210014	0.27803	-0.755365	0.45003	0.574179
FvH4_1g09560	63.3138	3.88359	1.49366	2.60006	NA	NA
FvH4_1g09571	50.33	0.208422	0.533084	0.390973	0.695817	0.787872
FvH4_1g09580	134.381	-0.74884	0.638181	-1.1734	0.240636	0.357048
FvH4_1g09610	357.648	2.30926	1.0027	2.30304	0.0212766	0.0516344
FvH4_1g09620	108.669	-3.59011	1.20666	-2.97525	0.00292752	0.00967286
FvH4_1g09630	99.9667	-0.809152	0.329375	-2.45663	0.0140248	0.0363391
FvH4_1g09640	13226.6	-7.26234	0.538341	-13.4902	1.78593e-41	4.89701e-39
FvH4_1g09650	132.448	-0.40463	0.280834	-1.44082	0.149637	0.247507
FvH4_1g09660	4.9127	2.12093	0.869574	2.43905	0.0147261	0.037839
FvH4_1g09670	809.605	0.532561	0.372857	1.42832	0.153199	0.252049
FvH4_1g09671	84.4581	-1.12351	0.424004	-2.64976	0.00805498	0.0227904
FvH4_1g09680	319.776	-0.962452	0.18469	-5.21117	1.87649e-07	1.6726e-06
FvH4_1g09690	622.062	-0.339509	0.337947	-1.00462	0.315079	0.438635
FvH4_1g09691	12.4014	0.180801	0.721398	0.250626	0.802103	0.871986
FvH4_1g09700	35.2353	0.513555	0.576491	0.89083	0.37302	0.499028
FvH4_1g09701	13.0196	-0.147118	0.62047	-0.237108	0.812573	0.880228
FvH4_1g09716	34.9878	-0.841253	1.2845	-0.654926	0.512515	0.63349
FvH4_1g09717	36.9957	0.452978	0.340162	1.33166	0.182973	0.288985
FvH4_1g09720	38.1146	-0.341846	0.658163	-0.519394	0.603486	0.714189
FvH4_1g09730	84.4251	0.207583	0.412377	0.503382	0.614696	0.723573
FvH4_1g09750	181.763	-0.232222	0.302465	-0.767763	0.442628	0.567076
FvH4_1g09751	93.2515	-0.292537	0.374173	-0.781823	0.434319	0.559309
FvH4_1g09760	453.347	0.0136589	0.349953	0.0390307	0.968866	0.988698
FvH4_1g09770	10.7448	9.76023	4.79742	2.03447	0.0419039	0.0897046
FvH4_1g09790	206.215	0.835293	0.513087	1.62798	0.10353	0.185542
FvH4_1g09800	408.343	-0.525602	0.291253	-1.80462	0.0711336	0.137382
FvH4_1g09810	179.938	-0.240466	0.425889	-0.564622	0.572331	0.686527
FvH4_1g09820	10.7421	6.46484	1.16115	5.56761	2.58262e-08	2.69389e-07
FvH4_1g09830	673.689	-4.92802	0.831731	-5.92503	3.1225e-09	3.70044e-08
FvH4_1g09831	449.905	1.02859	0.428721	2.3992	0.0164309	0.041457
FvH4_1g09860	69.8782	0.867099	0.26908	3.22246	0.00127094	0.00470963
FvH4_1g09870	520.739	-0.469587	0.51882	-0.905107	0.365409	0.491695
FvH4_1g09890	22.6589	-0.288264	0.537174	-0.536631	0.591522	0.704425
FvH4_1g09900	27.8562	11.198	4.89327	2.28844	0.0221117	0.0533131
FvH4_1g09940	444.787	-0.232389	0.327682	-0.70919	0.478206	0.601418
FvH4_1g09950	0.699932	0.184542	3.5367	0.0521792	0.958386	NA
FvH4_1g09960	778.769	-0.0957971	0.288965	-0.331518	0.740253	0.823438
FvH4_1g09970	40.4272	-1.01474	0.43611	-2.32679	0.0199766	0.0489125
FvH4_1g09980	2925.14	0.676994	0.695255	0.973734	0.330188	0.454735
FvH4_1g09990	536.719	-0.957417	0.265759	-3.60258	0.000315074	0.00139767
FvH4_1g10000	258.788	1.07968	0.306853	3.51858	0.000433868	0.00185054
FvH4_1g10010	1212.07	-0.792114	0.235782	-3.35953	0.000780762	0.00309483
FvH4_1g10030	54.6612	-8.5141	1.46419	-5.81488	6.06758e-09	6.90703e-08
FvH4_1g10040	6.00412	0	2.4591	0	1	1
FvH4_1g10070	199.913	0.36303	0.239666	1.51473	0.129841	0.221219
FvH4_1g10130	292.167	-0.438966	0.338963	-1.29503	0.195311	0.304373
FvH4_1g10140	396.7	3.88463	0.717754	5.4122	6.22547e-08	6.07212e-07
FvH4_1g10150	329.12	-0.354276	0.323981	-1.09351	0.274171	0.394193
FvH4_1g10160	933.815	0.55901	0.384228	1.45489	0.145699	0.242548
FvH4_1g10170	273.716	-0.258599	0.409279	-0.631841	0.527491	0.646557
FvH4_1g10180	1560.36	0.371007	0.483294	0.767663	0.442687	0.567087
FvH4_1g10190	337.195	0.353272	0.2657	1.32959	0.183653	0.289682
FvH4_1g10191	99.6354	4.01687	0.512186	7.8426	4.413e-15	1.0963e-13
FvH4_1g10192	3.16547	6.6632	1.71987	3.87424	0.000106957	0.000534079
FvH4_1g10210	17.713	0.292669	0.808551	0.361968	0.717376	0.805382
FvH4_1g10220	48.5842	-0.405545	0.4315	-0.939851	0.347294	0.472948
FvH4_1g10230	99.0561	-1.16052	0.530766	-2.1865	0.0287793	0.0661863
FvH4_1g10240	342.774	0.0165925	0.479458	0.0346067	0.972393	0.99096
FvH4_1g10250	588.852	0.425423	0.366852	1.15966	0.246188	0.363736
FvH4_1g10260	391.415	-0.286445	0.214791	-1.3336	0.182335	0.288245
FvH4_1g10270	122.467	0.367203	0.478694	0.767092	0.443027	0.567422
FvH4_1g10271	52.3209	-0.99841	0.716692	-1.39308	0.163595	0.265078
FvH4_1g10280	202.65	0.355571	0.390086	0.911518	0.362023	0.488219
FvH4_1g10290	467.652	0.798396	0.394784	2.02236	0.0431388	0.0919444
FvH4_1g10300	134.096	-0.296385	0.441548	-0.671241	0.502067	0.623602
FvH4_1g10310	379.165	0.172261	0.585137	0.294395	0.768456	0.846015
FvH4_1g10330	63.805	0.0156205	0.352807	0.044275	0.964685	0.985991
FvH4_1g10340	1968.91	0.533573	0.325493	1.63928	0.101155	0.182284
FvH4_1g10350	159.262	-0.294581	0.508811	-0.57896	0.562616	0.67824
FvH4_1g10370	98.3149	-2.86071	0.533398	-5.36318	8.17707e-08	7.77176e-07
FvH4_1g10380	8.21165	-0.489961	1.15273	-0.425045	0.670804	0.768113
FvH4_1g10390	34.358	-0.754811	0.522517	-1.44457	0.14858	0.246222
FvH4_1g10400	14.8533	-0.182184	0.950239	-0.191724	0.847958	0.906163
FvH4_1g10430	4.29523	3.74379	1.29959	2.88074	0.00396743	0.0125511
FvH4_1g10440	235.173	-0.355308	0.302982	-1.1727	0.240915	0.357268
FvH4_1g10450	490.635	-0.389264	0.258302	-1.50701	0.131808	0.22384
FvH4_1g10460	25.3404	-0.775199	0.501432	-1.54597	0.122112	0.2109
FvH4_1g10470	223.319	-0.312474	0.455253	-0.686375	0.492477	0.614573
FvH4_1g10471	3.96975	-1.62993	1.17207	-1.39064	0.164336	0.266007
FvH4_1g10480	11.9176	4.31442	1.34717	3.20258	0.00136201	0.00499782
FvH4_1g10490	369.381	-0.0123675	0.19746	-0.0626328	0.950059	0.977005
FvH4_1g10501	821.386	-0.426809	0.265817	-1.60565	0.10835	0.192125
FvH4_1g10510	169.835	0.669884	0.345186	1.94065	0.0523012	0.107494
FvH4_1g10520	4.86341	3.26259	0.930239	3.50726	0.000452747	0.00192135
FvH4_1g10521	373.424	0.259049	0.289909	0.893553	0.371561	0.497562
FvH4_1g10540	116.737	0.675686	0.307865	2.19475	0.0281816	0.0650249
FvH4_1g10550	13.2375	-5.74966	1.65751	-3.46885	0.000522688	0.00217689
FvH4_1g10560	123.765	0.327266	0.31762	1.03037	0.302837	0.425108
FvH4_1g10570	27.23	4.14902	0.510201	8.13213	4.21813e-16	1.16977e-14
FvH4_1g10572	5.63269	7.40986	2.35435	3.1473	0.00164784	0.00588586
FvH4_1g10580	7.16277	3.4439	0.763433	4.51106	6.45036e-06	4.28514e-05
FvH4_1g10640	28.7144	3.40725	0.550265	6.19201	5.94019e-10	7.75619e-09
FvH4_1g10661	183.011	1.44933	0.459353	3.15514	0.0016042	0.00574806
FvH4_1g10670	19.5849	0.306672	0.444958	0.689216	0.490688	0.613003
FvH4_1g10720	15.0075	-1.50021	0.641269	-2.33944	0.0193124	0.047589
FvH4_1g10740	78.4316	-1.0206	0.403749	-2.5278	0.0114778	0.0307158
FvH4_1g10750	1091.05	-0.892592	0.339663	-2.62788	0.00859194	0.0240338
FvH4_1g10770	184.512	3.10064	0.678198	4.57188	4.83363e-06	3.30932e-05
FvH4_1g10780	230.942	-0.722187	0.297532	-2.42726	0.0152132	0.0388676
FvH4_1g10810	233.974	0.295904	0.20248	1.4614	0.143906	0.240036
FvH4_1g10840	43.7229	2.54243	0.527103	4.8234	1.41131e-06	1.07234e-05
FvH4_1g10850	35.5374	-4.66398	1.4671	-3.17905	0.00147756	0.00535467
FvH4_1g10851	24.605	-1.22968	0.50575	-2.4314	0.0150404	0.0385069
FvH4_1g10860	216.358	-1.33829	0.382312	-3.50053	0.000464341	0.00196409
FvH4_1g10880	58.71	1.94948	0.469528	4.15199	3.29593e-05	0.000187626
FvH4_1g10900	35.752	2.4019	0.513818	4.67462	2.94503e-06	2.09748e-05
FvH4_1g10910	47.1535	1.71876	0.827877	2.0761	0.0378846	0.0827807
FvH4_1g10920	145.234	1.46459	0.301392	4.85942	1.1773e-06	9.09337e-06
FvH4_1g10930	226.976	7.54307	0.582028	12.96	2.06351e-38	4.19123e-36
FvH4_1g10940	648.264	-0.792814	0.258473	-3.0673	0.00216001	0.00743596
FvH4_1g10970	1.33566	-2.91034	2.19467	-1.32609	0.184809	0.29117
FvH4_1g10980	84.8884	0.780218	0.312276	2.49849	0.0124723	0.0329001
FvH4_1g10990	138.255	0.873793	0.24259	3.60193	0.00031586	0.00139946
FvH4_1g10991	282.824	-0.36597	0.357058	-1.02496	0.305382	0.427851
FvH4_1g11000	575.297	0.991605	0.22717	4.36503	1.27108e-05	7.92113e-05
FvH4_1g11020	137.462	1.3339	0.582518	2.28988	0.0220281	0.0531174
FvH4_1g11040	0.886034	-2.3322	3.70927	-0.628749	0.529513	NA
FvH4_1g11070	1261.97	1.20316	0.729738	1.64875	0.0991989	0.179405
FvH4_1g11071	42.8805	-0.763971	0.705597	-1.08273	0.278929	0.398998
FvH4_1g11080	504.375	-2.04807	0.456945	-4.48209	7.3914e-06	4.85297e-05
FvH4_1g11100	989.763	-1.3454	0.249882	-5.38415	7.27864e-08	6.99975e-07
FvH4_1g11110	2715.41	-0.912431	0.249534	-3.65655	0.000255636	0.0011565
FvH4_1g11120	283.142	-0.234751	0.421965	-0.556329	0.577986	0.691937
FvH4_1g11140	17.0456	0.222499	0.769365	0.289198	0.77243	0.849452
FvH4_1g11150	522.061	0.0685263	0.301538	0.227256	0.820225	0.885402
FvH4_1g11170	142.107	0.996211	0.596403	1.67036	0.0948473	0.172977
FvH4_1g11181	29.7332	0.0488243	0.384448	0.126998	0.898942	0.941744
FvH4_1g11190	522.569	-0.309103	0.201901	-1.53096	0.12578	0.215808
FvH4_1g11200	226.766	0.112695	0.407298	0.276689	0.782019	0.856949
FvH4_1g11210	919.683	-0.538616	0.381175	-1.41304	0.157643	0.257583
FvH4_1g11220	3.54849	-1.3826	1.34773	-1.02587	0.304954	0.427415
FvH4_1g11230	19.4329	-1.7719	0.776415	-2.28215	0.0224802	0.0539584
FvH4_1g11240	265.789	1.28047	0.362179	3.53547	0.000407051	0.00174805
FvH4_1g11260	716.227	0.475713	0.386383	1.23119	0.21825	0.330928
FvH4_1g11280	0.629657	0.203429	2.91868	0.069699	0.944433	NA
FvH4_1g11290	107.496	-1.32652	0.389122	-3.409	0.000652009	0.00264274
FvH4_1g11300	3735.35	-1.62232	0.569526	-2.84854	0.00439199	0.0136792
FvH4_1g11310	351.846	1.71559	0.389717	4.40214	1.07191e-05	6.80757e-05
FvH4_1g11320	201.538	0.433825	0.427776	1.01414	0.310516	0.4333
FvH4_1g11330	37.5368	8.77891	1.01594	8.64117	5.564e-18	1.88657e-16
FvH4_1g11340	44.5402	11.8828	4.89285	2.42861	0.0151569	0.0387448
FvH4_1g11341	9.38762	8.65512	1.76221	4.91152	9.03745e-07	7.15171e-06
FvH4_1g11342	24.3655	2.96591	0.589966	5.02725	4.97554e-07	4.11242e-06
FvH4_1g11350	379.892	2.32189	0.206974	11.2183	3.3173e-29	3.48174e-27
FvH4_1g11390	412.729	14.1283	4.89223	2.8879	0.00387818	0.0123013
FvH4_1g11391	105.882	1.16928	0.318849	3.66719	0.00024523	0.00111536
FvH4_1g11392	7.26222	0.172743	0.998493	0.173004	0.862649	0.91661
FvH4_1g11400	173.943	-0.518159	0.300484	-1.72442	0.0846327	0.158054
FvH4_1g11410	926.683	0.0721538	0.257313	0.280412	0.779161	0.85484
FvH4_1g11420	654.758	0.761596	0.382293	1.99218	0.0463515	0.0975316
FvH4_1g11430	923.457	0.600387	0.491481	1.22159	0.221864	0.33511
FvH4_1g11470	85.6037	-0.114151	0.26677	-0.427901	0.668723	0.766564
FvH4_1g11480	30.5865	3.85078	0.756948	5.08724	3.6331e-07	3.07112e-06
FvH4_1g11490	19.0567	1.79189	0.502397	3.56669	0.000361516	0.00157158
FvH4_1g11500	10.5807	3.87653	1.04693	3.70276	0.000213263	0.000989035
FvH4_1g11510	166.504	-0.900913	0.610009	-1.47688	0.139707	0.234565
FvH4_1g11520	1487.66	-0.0861757	0.332994	-0.258791	0.795797	0.867322
FvH4_1g11530	224.772	-2.10456	0.68754	-3.061	0.00220601	0.00757308
FvH4_1g11540	196.919	1.33586	0.43421	3.07654	0.00209418	0.00724573
FvH4_1g11550	1.17466	4.71625	4.88512	0.965433	0.334328	0.459225
FvH4_1g11570	223.094	-0.628301	0.358104	-1.75452	0.0793414	0.15005
FvH4_1g11580	5.63239	0.893178	1.48006	0.603473	0.546194	0.663564
FvH4_1g11590	3.28311	-2.7116	2.25131	-1.20446	0.228414	0.343019
FvH4_1g11600	163.817	-1.71259	0.767009	-2.23281	0.0255614	0.0599695
FvH4_1g11610	11.6903	-1.81577	0.687449	-2.64132	0.00825835	0.0232698
FvH4_1g11620	889.506	-0.0581193	0.184351	-0.315264	0.752561	0.833116
FvH4_1g11630	173.573	-2.41862	0.567087	-4.265	1.99905e-05	0.000119714
FvH4_1g11640	508.05	-0.140505	0.569485	-0.246723	0.805122	0.874791
FvH4_1g11650	235.325	-0.861756	0.502358	-1.71542	0.0862678	0.160343
FvH4_1g11660	83.5466	-0.143173	0.429114	-0.333648	0.738645	0.822066
FvH4_1g11690	255.684	1.3055	0.523075	2.49581	0.0125669	0.0331098
FvH4_1g11700	5.53146	0.172165	0.796129	0.216252	0.828791	0.892156
FvH4_1g11710	184.247	0.460327	0.396941	1.15969	0.246176	0.363736
FvH4_1g11720	193.047	-2.53839	1.00219	-2.53284	0.0113142	0.030341
FvH4_1g11721	604.953	-1.30316	0.53365	-2.44199	0.0146067	0.0375939
FvH4_1g11730	2349.48	3.53401	0.348927	10.1282	4.14178e-24	2.60327e-22
FvH4_1g11750	144.596	0.302542	0.479344	0.631158	0.527937	0.647046
FvH4_1g11760	298.84	5.27003	0.90695	5.81072	6.2203e-09	7.06036e-08
FvH4_1g11761	55.0004	0.896395	0.467787	1.91625	0.0553338	0.112567
FvH4_1g11770	73.5783	0.476025	0.321355	1.48131	0.138525	0.232956
FvH4_1g11780	870.562	-0.723019	0.158786	-4.55342	5.27805e-06	3.57674e-05
FvH4_1g11800	1.48027	5.89916	3.39614	1.73702	0.0823834	0.154787
FvH4_1g11810	2675.76	-0.032931	0.451426	-0.0729489	0.941847	0.971495
FvH4_1g11830	26.5942	11.1324	1.60475	6.93712	4.00176e-12	7.01139e-11
FvH4_1g11840	7.58892	3.32511	0.943492	3.52425	0.000424677	0.00181522
FvH4_1g11850	21.5066	1.62603	1.00818	1.61284	0.10678	0.189978
FvH4_1g11860	1580.82	1.25406	0.492566	2.54598	0.0108973	0.0293917
FvH4_1g11870	76.6474	4.74932	0.728109	6.52281	6.90015e-11	1.03531e-09
FvH4_1g11880	1.10799	3.99716	3.3313	1.19988	0.230185	0.345066
FvH4_1g11900	56.0462	-0.199838	0.335401	-0.595819	0.551296	0.667876
FvH4_1g11910	15.4201	-4.35303	1.11155	-3.91619	8.99578e-05	0.000458271
FvH4_1g11920	412.595	0.247226	0.146629	1.68606	0.0917839	0.168497
FvH4_1g11930	163.564	0.46898	0.246234	1.90461	0.0568307	0.114993
FvH4_1g11960	693.288	-0.475088	0.211346	-2.24791	0.0245816	0.0580433
FvH4_1g11970	160.824	0.257587	0.345971	0.744531	0.456555	0.580647
FvH4_1g11971	4.77705	-0.659694	1.6182	-0.407672	0.683515	0.778303
FvH4_1g11980	45.6566	-5.79861	1.53636	-3.77426	0.000160485	0.000764971
FvH4_1g11990	80.734	-1.90143	0.557869	-3.40838	0.000653501	0.00264633
FvH4_1g12000	92.9869	-0.392989	0.413876	-0.949533	0.34235	0.467807
FvH4_1g12010	446.109	0.278573	0.578371	0.481651	0.630054	0.735426
FvH4_1g12020	238.53	1.32086	0.397281	3.32474	0.000884999	0.00344636
FvH4_1g12030	970.423	1.02178	0.663417	1.54018	0.123516	0.212757
FvH4_1g12050	8.20804	2.75122	0.82375	3.33987	0.000838168	0.00328968
FvH4_1g12060	1434.49	-1.47657	0.527927	-2.79691	0.00515938	0.0156993
FvH4_1g12070	326.339	4.28376	0.919388	4.65935	3.17202e-06	2.24674e-05
FvH4_1g12090	128.311	-0.185497	0.868935	-0.213476	0.830956	0.893831
FvH4_1g12100	45.5243	-1.06697	0.402761	-2.64914	0.00806981	0.0228265
FvH4_1g12110	318.956	-2.99994	0.53904	-5.56534	2.61646e-08	2.724e-07
FvH4_1g12120	857.469	-0.621844	0.275998	-2.25308	0.0242543	0.0574312
FvH4_1g12131	0.826514	2.67896	2.78028	0.963556	0.335269	NA
FvH4_1g12133	1.03008	0	3.06922	0	1	1
FvH4_1g12150	1.18889	1.03984	1.83693	0.566076	0.571342	0.68576
FvH4_1g12151	164.831	0.853554	0.300341	2.84195	0.00448383	0.0139041
FvH4_1g12160	788.187	-0.528019	0.379731	-1.39051	0.164375	0.266047
FvH4_1g12170	459.844	1.40575	0.536056	2.62239	0.00873142	0.0243587
FvH4_1g12180	242.321	0.258875	0.239704	1.07998	0.280152	0.400327
FvH4_1g12190	430.895	-0.552881	0.226985	-2.43576	0.0148607	0.0381401
FvH4_1g12200	169.896	0.322571	0.26363	1.22358	0.221112	0.334181
FvH4_1g12210	130.998	7.65412	0.829033	9.23258	2.64185e-20	1.14529e-18
FvH4_1g12211	12.5352	6.28094	1.32271	4.74855	2.04883e-06	1.50766e-05
FvH4_1g12220	233.677	2.09418	0.695264	3.01206	0.00259483	0.00872206
FvH4_1g12240	8.36537	8.43076	1.86954	4.50954	6.49689e-06	4.31213e-05
FvH4_1g12241	69.1914	3.08502	0.709617	4.34744	1.37735e-05	8.50848e-05
FvH4_1g12250	151.143	1.16096	0.497561	2.3333	0.0196323	0.048233
FvH4_1g12260	3.13222	1.56899	1.25493	1.25026	0.211203	0.322854
FvH4_1g12280	442.635	1.41015	0.649511	2.1711	0.0299235	0.0682208
FvH4_1g12300	409.025	-0.0355047	0.27305	-0.13003	0.896543	0.940354
FvH4_1g12310	147.799	-0.978257	0.467948	-2.09053	0.0365706	0.0804303
FvH4_1g12320	215.607	2.23029	0.247512	9.01082	2.04515e-19	8.23162e-18
FvH4_1g12330	100.85	-1.07059	0.352848	-3.03414	0.00241224	0.00820368
FvH4_1g12340	1.80101	0.254863	1.55227	0.164187	0.869584	0.92213
FvH4_1g12350	569.603	1.52493	0.811808	1.87843	0.060322	0.120545
FvH4_1g12360	85.5326	1.3637	0.584173	2.33442	0.0195739	0.0481143
FvH4_1g12370	98.786	0.0957507	0.234276	0.408709	0.682753	0.777818
FvH4_1g12390	1.33059	5.40251	2.49536	2.16502	0.0303864	0.0690445
FvH4_1g12391	174.984	0.51248	0.203705	2.51579	0.0118765	0.0316168
FvH4_1g12400	692.994	-0.395797	0.414656	-0.95452	0.339821	0.46537
FvH4_1g12410	474.053	-3.4911	0.694556	-5.02638	4.9983e-07	4.12811e-06
FvH4_1g12420	429.888	0.182796	0.489012	0.373806	0.708548	0.798167
FvH4_1g12450	19.5052	0	2.04269	0	1	1
FvH4_1g12460	88.2368	0.447205	0.505354	0.884934	0.376192	0.501986
FvH4_1g12461	9.51678	2.09851	0.997059	2.1047	0.0353174	0.0781916
FvH4_1g12470	50.7322	-0.45995	0.393144	-1.16993	0.24203	0.358703
FvH4_1g12480	271.679	-0.327176	0.357109	-0.916179	0.359573	0.48548
FvH4_1g12490	13.8054	4.05695	0.891778	4.54929	5.38284e-06	3.63877e-05
FvH4_1g12510	85.0772	-0.0871506	0.408296	-0.213449	0.830977	0.893831
FvH4_1g12520	163.318	1.44245	0.661577	2.18031	0.0292341	0.0670234
FvH4_1g12530	54.6424	-0.423339	0.448674	-0.943533	0.345408	0.470935
FvH4_1g12531	51.5209	-0.749541	0.359886	-2.08272	0.0372772	0.081714
FvH4_1g12540	18.3786	0.809139	0.585958	1.38088	0.167315	0.269592
FvH4_1g12550	77.9119	-2.22077	2.46734	-0.900065	0.368086	0.494054
FvH4_1g12560	708.02	-3.74572	0.981221	-3.8174	0.000134863	0.000655375
FvH4_1g12580	14.0921	-1.50753	0.740295	-2.03639	0.0417113	0.0893535
FvH4_1g12582	531.467	2.43781	0.854664	2.85236	0.00433959	0.0135391
FvH4_1g12600	19.4774	-6.91766	1.50533	-4.59544	4.31837e-06	2.97512e-05
FvH4_1g12620	150.783	1.02864	0.550779	1.8676	0.0618176	0.122807
FvH4_1g12630	763.599	-2.03358	0.316471	-6.42579	1.31188e-10	1.88704e-09
FvH4_1g12640	1.34299	0.903263	3.53766	0.255328	0.79847	0.869162
FvH4_1g12650	226.759	-0.533162	0.196989	-2.70656	0.00679848	0.0197813
FvH4_1g12651	1.88241	-1.60771	3.41577	-0.470673	0.637874	0.741713
FvH4_1g12660	250.529	-2.54754	0.478711	-5.32167	1.02821e-07	9.60191e-07
FvH4_1g12680	26.8309	-2.80717	0.977358	-2.87221	0.00407616	0.0128285
FvH4_1g12690	296.821	-3.05278	0.561533	-5.43651	5.43347e-08	5.34478e-07
FvH4_1g12700	130.39	-1.36635	0.739942	-1.84656	0.0648107	0.127426
FvH4_1g12710	62.2115	-0.0371752	0.490922	-0.0757253	0.939638	0.969926
FvH4_1g12711	1.67335	3.78553	2.18259	1.73442	0.082843	0.155438
FvH4_1g12713	0.458067	-0.80261	3.84495	-0.208744	0.834648	NA
FvH4_1g12715	0.62931	0.126776	2.56801	0.0493673	0.960627	NA
FvH4_1g12716	243.182	-2.32432	0.366199	-6.34716	2.19329e-10	3.02591e-09
FvH4_1g12717	2.1036	0.527715	1.62063	0.325623	0.744709	0.827011
FvH4_1g12718	1.74532	3.30635	1.73865	1.90167	0.0572137	0.115661
FvH4_1g12719	1.20103	2.0399	2.67464	0.762684	0.445652	0.569786
FvH4_1g12720	61.908	-6.4289	1.40663	-4.57043	4.86722e-06	3.32988e-05
FvH4_1g12730	12.6802	0.247273	1.19905	0.206224	0.836616	0.898067
FvH4_1g12731	1.50214	2.39181	2.35942	1.01373	0.310712	0.433518
FvH4_1g12740	36.289	0.595319	0.688549	0.864599	0.387259	0.513815
FvH4_1g12741	56.1686	1.33636	0.676396	1.9757	0.0481885	0.100682
FvH4_1g12742	41.7509	5.05236	1.00833	5.01061	5.42587e-07	4.46583e-06
FvH4_1g12750	4.23138	1.74972	3.80163	0.460255	0.645333	0.747519
FvH4_1g12751	8.09358	-5.6784	1.69119	-3.35763	0.000786139	0.00311221
FvH4_1g12752	3.39296	-2.0044	1.6457	-1.21797	0.223237	0.33679
FvH4_1g12760	305.582	-0.897899	0.324521	-2.76684	0.00566023	0.0169367
FvH4_1g12761	64.9719	3.98023	0.873922	4.55444	5.25245e-06	3.5638e-05
FvH4_1g12770	34.1328	-0.235006	0.827347	-0.284048	0.776374	0.852593
FvH4_1g12780	16.5135	-1.90192	0.862952	-2.20397	0.0275264	0.0637583
FvH4_1g12781	2.57449	-2.31319	1.66666	-1.38792	0.165162	0.267143
FvH4_1g12790	33.4831	1.02981	0.341979	3.01133	0.00260108	0.00873771
FvH4_1g12800	9.92069	0.681813	0.738374	0.923397	0.3558	0.48181
FvH4_1g12820	48.0252	-1.40418	0.463586	-3.02895	0.00245402	0.00831371
FvH4_1g12830	1.05094	6.21023	4.04058	1.53696	0.124302	0.213845
FvH4_1g12840	1.32169	0.917015	1.97123	0.4652	0.641788	0.74504
FvH4_1g12841	1.785	5.01908	1.95782	2.56361	0.0103591	0.0281967
FvH4_1g12850	2.90506	7.67406	2.37783	3.22734	0.00124947	0.00464392
FvH4_1g12860	2.64183	-0.246713	1.77785	-0.13877	0.889632	0.935745
FvH4_1g12870	5.6809	-0.123753	0.933603	-0.132555	0.894546	0.938714
FvH4_1g12880	102.607	2.03164	0.257617	7.8863	3.11273e-15	7.83937e-14
FvH4_1g12900	398.934	-0.763963	0.28124	-2.71641	0.00659948	0.0192662
FvH4_1g12901	184.129	3.90974	0.803401	4.86649	1.13599e-06	8.80239e-06
FvH4_1g12950	628.7	-0.701993	0.359991	-1.95003	0.0511728	0.10558
FvH4_1g12970	3374.88	-1.36588	0.606882	-2.25065	0.0244075	0.0577068
FvH4_1g12980	439.547	-0.949519	0.461083	-2.05932	0.0394631	0.0855297
FvH4_1g12990	48.4306	-3.29325	0.737248	-4.46695	7.93425e-06	5.17839e-05
FvH4_1g13000	62.5653	1.96263	0.62376	3.14644	0.00165269	0.00589965
FvH4_1g13010	109.85	0.0565762	0.308552	0.18336	0.854515	0.910951
FvH4_1g13011	170.392	-0.434759	0.472105	-0.920896	0.357105	0.483039
FvH4_1g13030	232.109	2.27351	0.587872	3.86736	0.000110019	0.000547501
FvH4_1g13050	134.123	-1.58597	0.460614	-3.44315	0.000574975	0.00236813
FvH4_1g13060	18.0422	4.30022	0.630619	6.81904	9.16538e-12	1.52659e-10
FvH4_1g13070	536.968	0.0154664	0.315678	0.0489943	0.960924	0.983701
FvH4_1g13080	441.737	-0.0361909	0.512292	-0.0706451	0.94368	0.97268
FvH4_1g13090	95.2368	0.730051	0.49723	1.46824	0.14204	0.237574
FvH4_1g13110	36.644	1.22667	0.536079	2.28822	0.0221244	0.0533203
FvH4_1g13120	227.007	0.0182742	0.311896	0.0585907	0.953278	0.97903
FvH4_1g13160	1.18453	1.0733	3.13203	0.342686	0.731835	0.816807
FvH4_1g13170	75.188	3.60371	0.941963	3.82575	0.000130377	0.00063611
FvH4_1g13180	265.245	0.270104	0.301813	0.894939	0.370819	0.496812
FvH4_1g13190	5.08672	8.72791	3.03344	2.87723	0.00401183	0.0126697
FvH4_1g13192	7.18581	-3.50892	1.68389	-2.08382	0.0371763	0.0815337
FvH4_1g13200	200.059	6.36626	0.474972	13.4034	5.77255e-41	1.48973e-38
FvH4_1g13230	5.57156	2.5729	1.05109	2.44785	0.0143712	0.0370835
FvH4_1g13250	134.184	-0.522471	0.311777	-1.67578	0.0937811	0.171389
FvH4_1g13260	10.8917	4.23442	0.728291	5.81419	6.09284e-09	6.92664e-08
FvH4_1g13270	37.4238	-1.38775	0.474861	-2.92243	0.00347311	0.011153
FvH4_1g13290	151.863	-1.84022	0.613082	-3.0016	0.00268568	0.00898614
FvH4_1g13300	166.15	-1.8875	0.459342	-4.10914	3.9714e-05	0.000221389
FvH4_1g13310	16.4614	0.0137546	0.635063	0.0216586	0.98272	0.998562
FvH4_1g13311	370.807	0.313003	0.268058	1.16767	0.24294	0.359808
FvH4_1g13320	221.342	-0.68072	0.441091	-1.54326	0.122767	0.211798
FvH4_1g13330	568.451	-0.0155139	0.449563	-0.0345089	0.972471	0.990994
FvH4_1g13340	2.87148	0.35374	1.37575	0.257126	0.797081	0.868248
FvH4_1g13350	1714.2	-0.312162	0.436316	-0.715449	0.474331	0.597538
FvH4_1g13370	4048.24	-0.852651	0.568307	-1.50033	0.133528	0.226148
FvH4_1g13380	1087.07	-5.95479	0.616488	-9.65921	4.493e-22	2.3749e-20
FvH4_1g13400	559.287	0.474605	0.736151	0.644711	0.519115	0.639269
FvH4_1g13410	3281.77	-1.07918	0.392977	-2.74616	0.00602969	0.0178788
FvH4_1g13420	118.199	6.33049	1.09159	5.79935	6.65727e-09	7.53141e-08
FvH4_1g13430	41.5173	-1.1124	0.44642	-2.49182	0.012709	0.033436
FvH4_1g13440	264.856	6.9891	0.770344	9.0727	1.161e-19	4.86025e-18
FvH4_1g13450	1076.99	0.533148	0.228934	2.32883	0.0198681	0.0486958
FvH4_1g13460	2.94769	-0.785809	2.61356	-0.300666	0.763669	0.842224
FvH4_1g13470	324.228	-0.63081	0.317706	-1.98551	0.0470872	0.0988332
FvH4_1g13480	2.40953	1.52607	2.27939	0.669511	0.50317	0.624577
FvH4_1g13490	243.309	-0.953664	0.471687	-2.02182	0.0431954	0.0920181
FvH4_1g13491	4.9726	1.12018	1.11896	1.00108	0.316787	0.440565
FvH4_1g13510	113.015	3.77521	0.435756	8.66358	4.57176e-18	1.56209e-16
FvH4_1g13530	262.983	0.465387	0.319807	1.45521	0.145611	0.242438
FvH4_1g13540	293.157	-1.0773	0.46743	-2.30472	0.0211821	0.0514448
FvH4_1g13550	17.0342	5.1716	1.46969	3.51884	0.000433431	0.00184904
FvH4_1g13570	317.368	-4.50094	0.389477	-11.5564	6.85484e-31	8.35376e-29
FvH4_1g13610	545.07	-3.78333	0.404862	-9.34473	9.21278e-21	4.26353e-19
FvH4_1g13640	2.46301	4.65387	2.86172	1.62625	0.103896	0.18603
FvH4_1g13650	55.8746	-1.56994	0.444522	-3.53175	0.000412823	0.00176973
FvH4_1g13660	126.001	0.511261	0.253041	2.02047	0.0433345	0.0922272
FvH4_1g13670	119.038	-1.20263	0.445802	-2.69767	0.00698263	0.0202286
FvH4_1g13680	837.436	-0.0524216	0.198788	-0.263706	0.792006	0.864738
FvH4_1g13700	285.572	-0.0769513	0.219258	-0.350962	0.725617	0.811767
FvH4_1g13710	378.49	1.48749	0.702416	2.11768	0.034202	0.0760908
FvH4_1g13720	613.488	0.998801	0.298511	3.34594	0.000820037	0.00322814
FvH4_1g13730	2364.67	1.8758	1.15273	1.62726	0.103681	0.185753
FvH4_1g13740	356.996	1.78256	0.598197	2.97988	0.00288362	0.00954505
FvH4_1g13750	7.46034	-2.73837	1.73677	-1.5767	0.114864	0.201091
FvH4_1g13760	45.9754	-2.3592	0.714501	-3.30188	0.000960378	0.00370048
FvH4_1g13780	3.51169	4.60498	1.76678	2.60642	0.00914935	0.0253345
FvH4_1g13790	1.56321	6.06216	4.48368	1.35205	0.17636	0.281049
FvH4_1g13800	1.90283	5.32815	1.84092	2.89428	0.0038003	0.0120805
FvH4_1g13810	2.66372	5.86879	3.96017	1.48195	0.138353	0.232729
FvH4_1g13820	13.5039	-4.03523	1.48585	-2.71578	0.00661207	0.0192952
FvH4_1g13850	1.23675	-0.486017	2.07034	-0.234752	0.814401	0.88138
FvH4_1g13870	200.693	-1.03338	0.404226	-2.55643	0.0105751	0.0286957
FvH4_1g13880	407.893	0.404239	0.378685	1.06748	0.285756	0.406354
FvH4_1g13910	0.714066	0	4.47045	0	1	NA
FvH4_1g13911	5.55147	1.09438	1.03547	1.05689	0.290563	0.411584
FvH4_1g13912	9.0622	1.00406	1.06754	0.940535	0.346943	0.472558
FvH4_1g13920	3.35909	-1.40039	1.86157	-0.752262	0.451894	0.575954
FvH4_1g13930	180.21	-1.21952	1.3728	-0.888343	0.374356	0.50021
FvH4_1g13940	221.954	-1.13805	0.554849	-2.0511	0.0402569	0.0868911
FvH4_1g13950	515.003	0.219436	0.289742	0.757351	0.44884	0.572893
FvH4_1g13960	2624.94	0.206207	0.431208	0.478209	0.632501	0.737381
FvH4_1g13970	2003.5	1.9442	0.272523	7.13406	9.74475e-13	1.84277e-11
FvH4_1g13980	2037.3	-1.54387	0.32342	-4.77356	1.81e-06	1.34727e-05
FvH4_1g13990	57.069	2.01218	0.653895	3.07722	0.00208939	0.0072359
FvH4_1g13991	1.14167	-1.59459	2.52893	-0.630539	0.528342	0.647325
FvH4_1g14000	53.4318	0.0425968	0.57199	0.0744713	0.940635	0.970636
FvH4_1g14010	1.61394	0.501897	1.88041	0.266909	0.789539	0.863119
FvH4_1g14011	147.601	-2.71741	1.15759	-2.34747	0.0189016	0.0467448
FvH4_1g14013	30.6974	5.61278	1.02551	5.47315	4.42112e-08	4.42839e-07
FvH4_1g14040	728.811	1.1631	0.32056	3.62832	0.000285267	0.00127706
FvH4_1g14050	123.608	2.41192	0.30902	7.80504	5.94807e-15	1.46439e-13
FvH4_1g14060	855.194	-1.27801	0.612409	-2.08686	0.0369005	0.0810747
FvH4_1g14070	418.201	2.13348	0.309198	6.90003	5.19902e-12	8.93075e-11
FvH4_1g14080	217.475	-0.87156	0.197179	-4.42014	9.86382e-06	6.31192e-05
FvH4_1g14090	356.263	-0.831186	0.67353	-1.23407	0.217175	0.329708
FvH4_1g14100	161.921	1.69866	0.825051	2.05886	0.0395081	0.0855946
FvH4_1g14110	244.355	0.369759	0.213666	1.73055	0.0835326	0.156457
FvH4_1g14120	9.55258	7.70048	1.40803	5.46897	4.52654e-08	4.53191e-07
FvH4_1g14140	160.73	5.48504	1.07417	5.1063	3.28526e-07	2.79866e-06
FvH4_1g14150	39.8687	-2.37314	0.697102	-3.40429	0.000663367	0.00268183
FvH4_1g14170	110.405	0.868216	0.89431	0.970822	0.331637	0.4561
FvH4_1g14180	2.35859	-1.16328	1.57852	-0.736939	0.461159	0.584942
FvH4_1g14181	24.0456	-1.34509	0.590999	-2.27595	0.0228488	0.0547174
FvH4_1g14190	45.3581	-2.63969	0.484957	-5.44313	5.23514e-08	5.17521e-07
FvH4_1g14220	0.523063	-0.692022	3.55441	-0.194694	0.845633	NA
FvH4_1g14230	0.813213	-1.97001	2.61741	-0.752657	0.451656	NA
FvH4_1g14240	7.14469	-3.83231	1.59669	-2.40016	0.0163881	0.041354
FvH4_1g14250	38.4624	0.834569	0.388971	2.14558	0.0319065	0.0718658
FvH4_1g14251	5.38532	0.460216	0.875213	0.525833	0.599004	0.710795
FvH4_1g14252	8.64005	-0.217875	0.675637	-0.322473	0.747094	0.828569
FvH4_1g14280	2.43421	-0.140866	1.21699	-0.115749	0.907852	0.948558
FvH4_1g14300	2.25264	4.54526	1.78008	2.55341	0.0106675	0.0289141
FvH4_1g14310	513.555	-0.146654	0.398845	-0.367698	0.713099	0.801647
FvH4_1g14320	344.801	3.9184	0.58076	6.74703	1.50901e-11	2.45788e-10
FvH4_1g14330	372.483	-0.507022	0.250342	-2.02532	0.0428346	0.0914472
FvH4_1g14350	357.445	0.871904	0.313839	2.77819	0.00546634	0.0164575
FvH4_1g14360	26.3112	4.92384	1.10368	4.46129	8.14666e-06	5.30125e-05
FvH4_1g14390	12.1129	0.8676	0.899159	0.964902	0.334594	0.459533
FvH4_1g14400	111.934	3.29741	0.983224	3.35368	0.000797453	0.00314961
FvH4_1g14410	6.38997	0.477795	0.776115	0.615624	0.538142	0.656292
FvH4_1g14420	172.165	-0.190869	0.49197	-0.38797	0.698038	0.789384
FvH4_1g14430	6650.11	4.25619	0.509772	8.34922	6.87156e-17	2.09063e-15
FvH4_1g14460	67.0546	-6.07669	1.16334	-5.22347	1.75599e-07	1.5735e-06
FvH4_1g14470	143.658	3.41305	0.382818	8.9156	4.85203e-19	1.85327e-17
FvH4_1g14490	259.694	-0.0590969	0.225315	-0.262286	0.793101	0.865416
FvH4_1g14510	208.729	4.50481	0.669929	6.7243	1.76437e-11	2.82711e-10
FvH4_1g14520	115.256	2.0025	0.404784	4.94708	7.53365e-07	6.03572e-06
FvH4_1g14540	134.15	1.75314	0.347044	5.05164	4.38037e-07	3.65075e-06
FvH4_1g14550	224.072	0.0208233	0.601676	0.0346088	0.972392	0.99096
FvH4_1g14560	21.9004	1.34771	1.03811	1.29824	0.194205	0.303036
FvH4_1g14572	63.8868	-0.121411	0.381881	-0.317929	0.750539	0.831422
FvH4_1g14580	430.977	1.34959	0.285322	4.73006	2.24456e-06	1.6374e-05
FvH4_1g14590	435.636	0.433038	0.20553	2.10694	0.035123	0.0778082
FvH4_1g14600	48.3554	1.3056	0.549835	2.37453	0.0175715	0.0439557
FvH4_1g14610	100.972	0.536786	0.254467	2.10945	0.0349055	0.0774281
FvH4_1g14620	121.883	1.63951	1.19087	1.37674	0.168594	0.271154
FvH4_1g14630	4.48302	-3.55173	1.63011	-2.17883	0.0293441	0.0672054
FvH4_1g14640	97.164	0.197562	0.397012	0.497622	0.61875	0.726523
FvH4_1g14650	7.83992	-4.68038	1.43817	-3.25439	0.00113636	0.00427802
FvH4_1g14660	15.5052	-3.4053	0.853585	-3.98941	6.62388e-05	0.00034945
FvH4_1g14670	5.63759	3.92032	1.64778	2.37915	0.0173524	0.0434953
FvH4_1g14700	1.34952	-2.15641	1.95196	-1.10474	0.269271	0.388779
FvH4_1g14710	44.3944	-2.19581	0.524907	-4.18324	2.87378e-05	0.000165544
FvH4_1g14721	27.7	0.621535	0.375826	1.65378	0.098172	0.177916
FvH4_1g14740	27.2448	1.34385	0.402571	3.33818	0.000843283	0.00330505
FvH4_1g14760	226.812	0.823413	0.301168	2.73406	0.00625577	0.0184494
FvH4_1g14770	13.079	3.88099	0.750782	5.16927	2.35014e-07	2.04981e-06
FvH4_1g14780	8.9654	5.1866	1.15673	4.48384	7.33108e-06	4.81769e-05
FvH4_1g14790	3.73654	1.0632	1.27463	0.83412	0.404214	0.530059
FvH4_1g14800	20.8548	-0.362059	0.468284	-0.773161	0.439427	0.56407
FvH4_1g14810	119.944	1.23992	0.592368	2.09316	0.0363345	0.0800636
FvH4_1g14820	12.5265	2.75183	0.7282	3.77895	0.000157491	0.000752009
FvH4_1g14840	7.31679	-0.305931	0.907976	-0.336937	0.736165	0.820346
FvH4_1g14850	34.9077	-0.468121	0.406601	-1.1513	0.249607	0.367722
FvH4_1g14860	40.6814	1.44474	0.736399	1.9619	0.0497738	0.103281
FvH4_1g14871	1.54719	0	2.90144	0	1	1
FvH4_1g14880	6.36172	4.2786	0.967955	4.42025	9.85878e-06	6.31054e-05
FvH4_1g14881	3.18991	4.98493	1.32849	3.75233	0.000175197	0.000826832
FvH4_1g14890	35.7836	0.665398	0.474961	1.40095	0.161228	0.262289
FvH4_1g14891	1.06861	4.89287	3.14717	1.55469	0.12002	0.208255
FvH4_1g14901	1.43049	1.75261	2.07178	0.845943	0.397584	0.523618
FvH4_1g14930	1.36054	4.08895	2.94698	1.38751	0.165287	0.267266
FvH4_1g14940	5.22575	3.97928	1.2376	3.21531	0.00130304	0.00481283
FvH4_1g14950	2.11646	2.57444	1.8336	1.40403	0.160308	0.261044
FvH4_1g14960	550.416	0.00548483	0.812683	0.00674903	0.994615	1
FvH4_1g14970	35.0073	2.39415	0.858275	2.78949	0.00527907	0.0160058
FvH4_1g14990	94.2424	1.64486	0.339909	4.83911	1.30423e-06	9.98592e-06
FvH4_1g15000	10.621	-0.796152	2.5651	-0.310378	0.756273	0.836044
FvH4_1g15011	0.743072	3.04525	3.43587	0.886313	0.375449	NA
FvH4_1g15020	73.4899	-0.0808778	0.359611	-0.224904	0.822054	0.886688
FvH4_1g15050	7.58216	0.849355	0.738635	1.1499	0.250186	0.36808
FvH4_1g15070	7.18468	-1.90156	0.988778	-1.92314	0.0544623	0.111092
FvH4_1g15080	13.3914	0.987527	0.529771	1.86406	0.0623127	0.1236
FvH4_1g15090	41.9305	0.887389	0.609138	1.4568	0.145173	0.241856
FvH4_1g15102	15.1737	-0.255786	0.824573	-0.310205	0.756405	0.836105
FvH4_1g15120	200.267	-0.372838	0.452667	-0.823647	0.41014	0.536292
FvH4_1g15130	342.823	-0.218178	0.280746	-0.777138	0.437077	0.561935
FvH4_1g15140	2.14148	4.29393	1.59975	2.68414	0.00727177	0.0209151
FvH4_1g15150	1.40134	2.8193	1.76386	1.59837	0.109961	0.194361
FvH4_1g15160	196.99	1.27507	0.298948	4.26519	1.9973e-05	0.000119641
FvH4_1g15170	0.896411	2.07307	2.45068	0.845917	0.397599	0.523618
FvH4_1g15171	71.2532	2.04202	0.390859	5.22443	1.7469e-07	1.566e-06
FvH4_1g15180	1.41838	-0.318634	2.0896	-0.152485	0.878804	0.928229
FvH4_1g15200	35.356	2.1722	0.40179	5.4063	6.43414e-08	6.2534e-07
FvH4_1g15210	766.315	-1.26597	0.427068	-2.96433	0.00303346	0.00997035
FvH4_1g15220	2139.84	-2.25561	0.384367	-5.86837	4.40098e-09	5.11877e-08
FvH4_1g15230	2.23173	3.05006	1.51682	2.01082	0.044344	0.0940018
FvH4_1g15240	94.7926	0.521982	0.511297	1.0209	0.307302	0.429745
FvH4_1g15260	30.0337	6.44712	1.04255	6.18401	6.24949e-10	8.14288e-09
FvH4_1g15270	3.5098	2.16827	2.00694	1.08038	0.279972	0.400121
FvH4_1g15330	397.668	1.17262	0.40067	2.92665	0.00342634	0.0110287
FvH4_1g15350	0.848645	3.02158	2.72045	1.1107	0.2667	NA
FvH4_1g15351	25.6191	0.412941	0.588054	0.702215	0.482545	0.605105
FvH4_1g15380	116.758	0.861187	0.624775	1.3784	0.168081	0.270568
FvH4_1g15390	86.0772	0.0996717	0.471212	0.211522	0.83248	0.895029
FvH4_1g15400	6.95986	-1.6227	0.905811	-1.79144	0.0732234	0.140663
FvH4_1g15410	90.3194	0.110288	0.247351	0.445879	0.655685	0.75603
FvH4_1g15420	9.88608	-1.08384	0.970041	-1.11731	0.263862	0.383038
FvH4_1g15430	3.80531	4.8815	1.71018	2.85438	0.00431206	0.0134647
FvH4_1g15440	720.013	0.526818	0.472575	1.11478	0.264944	0.3841
FvH4_1g15470	14.2715	-1.27519	1.35628	-0.940213	0.347108	0.472724
FvH4_1g15480	122.018	-0.755645	0.591295	-1.27795	0.201267	0.311075
FvH4_1g15500	38.2005	0.559461	0.624335	0.896091	0.370204	0.4962
FvH4_1g15510	7.31941	5.00444	1.77155	2.8249	0.00472961	0.0145694
FvH4_1g15520	210.928	0.0767769	0.224981	0.341259	0.732909	0.817647
FvH4_1g15530	257.239	4.09061	0.715772	5.71496	1.09729e-08	1.20653e-07
FvH4_1g15540	60.6591	-0.333912	0.548654	-0.608602	0.542788	0.660377
FvH4_1g15560	112.722	0.095501	0.418932	0.227963	0.819675	0.885031
FvH4_1g15570	1.86247	1.08551	1.4193	0.764821	0.444378	0.568588
FvH4_1g15580	4.41307	3.60786	1.22997	2.93328	0.00335396	0.0108306
FvH4_1g15590	48.3732	-4.11364	1.44297	-2.85082	0.00436067	0.0135971
FvH4_1g15610	191.893	-0.751122	0.353021	-2.1277	0.0333623	0.0745173
FvH4_1g15620	839.519	0.405897	0.226115	1.79509	0.0726387	0.139748
FvH4_1g15630	82.9478	-0.108748	0.302899	-0.359022	0.719579	0.807029
FvH4_1g15670	82.9081	0.560371	0.451463	1.24123	0.214519	0.326738
FvH4_1g15680	91.4031	1.90019	0.297833	6.38006	1.77014e-10	2.48845e-09
FvH4_1g15690	905.118	0.809611	0.53628	1.50968	0.131125	0.222939
FvH4_1g15700	126.247	3.91964	0.719124	5.45058	5.02071e-08	4.9812e-07
FvH4_1g15710	183.78	0.812801	0.372544	2.18176	0.0291272	0.0668131
FvH4_1g15720	3.61641	-3.22871	1.89893	-1.70028	0.089078	0.164493
FvH4_1g15750	1.2936	-3.80759	3.02039	-1.26063	0.207442	0.318281
FvH4_1g15770	83.6341	-1.50068	0.310626	-4.83116	1.35738e-06	1.03567e-05
FvH4_1g15790	116.905	0.426358	0.454521	0.938037	0.348225	0.473894
FvH4_1g15810	170.5	1.29439	0.492449	2.62848	0.00857679	0.0239996
FvH4_1g15820	253.555	0.437561	0.346555	1.2626	0.206732	0.317434
FvH4_1g15830	21.0491	9.36919	1.99885	4.6873	2.76837e-06	1.9826e-05
FvH4_1g15840	46.7773	-0.785189	0.547822	-1.43329	0.151774	0.250001
FvH4_1g15860	58.1569	0.559133	0.860624	0.649683	0.515897	0.636172
FvH4_1g15870	101.315	0.791715	0.278215	2.84569	0.00443149	0.0137724
FvH4_1g15880	86.123	-1.08938	0.271877	-4.0069	6.15203e-05	0.000327233
FvH4_1g15890	40.424	-0.0184297	0.483458	-0.0381205	0.969592	0.989156
FvH4_1g15900	2.23159	0.80983	1.21591	0.666026	0.505395	0.626665
FvH4_1g15910	88.4877	-2.86738	0.47427	-6.04588	1.48599e-09	1.84475e-08
FvH4_1g15920	88.3152	-1.86624	0.550136	-3.39233	0.000693009	0.00278524
FvH4_1g15930	112.33	1.43714	0.950115	1.51259	0.130383	0.221866
FvH4_1g15940	45.117	1.07333	2.39346	0.44844	0.653836	0.754553
FvH4_1g15950	106.174	-0.795927	0.256079	-3.10813	0.00188276	0.00660275
FvH4_1g15970	6.30841	-0.233193	0.89792	-0.259704	0.795092	0.866856
FvH4_1g15980	719.491	-0.395517	0.372749	-1.06108	0.288653	0.409513
FvH4_1g15990	3.482	0.3999	1.39348	0.286979	0.774129	0.850723
FvH4_1g16000	1.63437	-0.400434	1.73686	-0.23055	0.817665	0.883822
FvH4_1g16010	103.232	-0.469795	0.662709	-0.708901	0.478386	0.601541
FvH4_1g16020	75.7802	-0.871019	0.722356	-1.2058	0.227893	0.342496
FvH4_1g16030	250.179	-0.615709	0.465157	-1.32366	0.185616	0.292191
FvH4_1g16050	243.63	6.33444	0.519317	12.1976	3.20037e-34	4.90932e-32
FvH4_1g16060	588.783	1.05665	0.430907	2.45215	0.0142007	0.0367213
FvH4_1g16070	29.8619	2.20089	0.744305	2.95698	0.00310672	0.0101703
FvH4_1g16080	403.654	1.69772	0.443996	3.82374	0.000131444	0.000640606
FvH4_1g16081	1.3323	3.54264	2.19926	1.61084	0.107215	0.190605
FvH4_1g16090	30.2461	8.1091	0.860419	9.42459	4.31799e-21	2.07263e-19
FvH4_1g16100	388.54	-0.377425	0.246359	-1.53202	0.125519	0.215444
FvH4_1g16102	2.19954	7.54345	4.90625	1.53752	0.124166	0.213641
FvH4_1g16103	42.0202	-0.0599761	0.391024	-0.153382	0.878097	0.92766
FvH4_1g16104	30.469	0.270355	0.451259	0.599113	0.549098	0.665948
FvH4_1g16130	10.7888	3.03893	0.974794	3.11751	0.00182383	0.00642072
FvH4_1g16140	194.724	1.21576	0.351477	3.45899	0.000542214	0.00224627
FvH4_1g16150	64.748	1.24242	0.453134	2.74183	0.00610973	0.0180868
FvH4_1g16160	2.02696	-0.69812	1.56758	-0.445349	0.656068	0.756227
FvH4_1g16170	41.2675	-1.93622	0.476895	-4.06005	4.90621e-05	0.000267585
FvH4_1g16171	9.1819	3.62185	0.821051	4.41124	1.0278e-05	6.55209e-05
FvH4_1g16180	12.0759	-2.30658	1.90865	-1.20849	0.22686	0.341153
FvH4_1g16200	168.356	-2.60639	0.589144	-4.42403	9.68785e-06	6.21428e-05
FvH4_1g16210	166.259	2.52484	0.584136	4.32235	1.54374e-05	9.46433e-05
FvH4_1g16211	94.5355	0.363209	0.234551	1.54853	0.121495	0.210084
FvH4_1g16212	679.993	-0.260862	0.437471	-0.596294	0.550979	0.667535
FvH4_1g16230	543.259	-1.06024	0.772534	-1.37242	0.169932	0.272906
FvH4_1g16240	595.736	-1.96614	0.516263	-3.8084	0.00013987	0.000676705
FvH4_1g16250	309.774	-0.29254	0.236854	-1.23511	0.21679	0.329261
FvH4_1g16260	80.8585	0.815858	0.30194	2.70205	0.00689138	0.0200092
FvH4_1g16271	1.18066	6.33612	4.92456	1.28664	0.198221	0.307575
FvH4_1g16300	1.04684	5.98347	4.93345	1.21284	0.225192	0.339213
FvH4_1g16301	13.2759	-5.28634	1.39398	-3.79226	0.000149283	0.000717189
FvH4_1g16302	18.6164	0.634316	0.511863	1.23923	0.21526	0.32745
FvH4_1g16303	39.7157	-1.00703	0.540265	-1.86395	0.0623282	0.123608
FvH4_1g16304	3.27058	2.45887	1.29367	1.9007	0.0573419	0.115867
FvH4_1g16320	4.56617	0.175235	0.969053	0.180832	0.8565	0.912579
FvH4_1g16321	31.9368	6.2043	0.619708	10.0117	1.35471e-23	7.96698e-22
FvH4_1g16330	153.043	1.79456	0.507487	3.53618	0.000405964	0.00174373
FvH4_1g16340	740.238	0.9085	0.528855	1.71786	0.085822	0.159745
FvH4_1g16350	732.789	2.26466	0.559679	4.04636	5.20205e-05	0.000281806
FvH4_1g16360	217.643	-0.385999	0.262384	-1.47112	0.141258	0.236501
FvH4_1g16370	103.531	3.17924	0.445234	7.1406	9.29232e-13	1.76329e-11
FvH4_1g16380	126.255	0.8819	0.228785	3.85472	0.000115864	0.000572945
FvH4_1g16390	1548.43	-1.07882	0.267622	-4.03114	5.55077e-05	0.000298363
FvH4_1g16400	45.2902	1.11264	0.438035	2.54007	0.011083	0.0298156
FvH4_1g16410	55.2032	2.70841	0.773863	3.49986	0.000465506	0.00196864
FvH4_1g16440	53.4071	2.61799	0.480943	5.44344	5.22603e-08	5.16854e-07
FvH4_1g16460	193.282	-0.0556609	0.682962	-0.0814992	0.935045	0.967078
FvH4_1g16470	123.689	0.922786	0.256373	3.59939	0.000318959	0.00141176
FvH4_1g16480	221.627	1.75037	0.628304	2.78586	0.0053386	0.0161483
FvH4_1g16500	342.016	1.1031	0.413769	2.66598	0.00767634	0.0218913
FvH4_1g16511	8.40986	-2.05529	1.42639	-1.4409	0.149612	0.247485
FvH4_1g16530	7715.48	-1.29073	0.440279	-2.93162	0.00337198	0.010876
FvH4_1g16560	13.7321	3.48361	0.683566	5.09622	3.46497e-07	2.94033e-06
FvH4_1g16570	348.051	-0.0933747	0.340637	-0.274118	0.783994	0.858297
FvH4_1g16580	224.392	0.197917	0.608119	0.325458	0.744835	0.827108
FvH4_1g16590	83.2076	-1.121	0.329826	-3.39878	0.000676883	0.00272943
FvH4_1g16600	20.1227	-1.36283	0.628263	-2.1692	0.0300672	0.0684682
FvH4_1g16610	12.7458	-0.909614	1.26354	-0.719891	0.471592	0.594941
FvH4_1g16620	148.777	0.406483	0.671098	0.605699	0.544714	0.662133
FvH4_1g16621	12.1292	-1.59083	0.831867	-1.91236	0.0558304	0.113345
FvH4_1g16630	112.89	0.484492	0.486334	0.996213	0.319147	0.442808
FvH4_1g16640	537.445	0.854822	0.375038	2.2793	0.0226495	0.0543231
FvH4_1g16650	41.7952	0.360933	0.527819	0.68382	0.494089	0.615989
FvH4_1g16660	189.758	0.87751	0.30526	2.87463	0.00404502	0.0127524
FvH4_1g16680	28.7421	4.76894	0.831299	5.73673	9.6523e-09	1.0699e-07
FvH4_1g16700	26.0037	-0.465373	0.495366	-0.939452	0.347499	0.473109
FvH4_1g16740	9.0788	0.889926	0.746734	1.19176	0.233356	0.348627
FvH4_1g16750	159.694	0.710514	0.652841	1.08834	0.276445	0.396527
FvH4_1g16760	68.4099	1.16714	0.537525	2.17132	0.029907	0.0682025
FvH4_1g16770	566.802	0.504915	0.439171	1.1497	0.250268	0.368176
FvH4_1g16780	285.678	1.40382	0.527331	2.66212	0.00776509	0.0221013
FvH4_1g16790	6.76828	-6.07219	1.85881	-3.26671	0.00108803	0.00412426
FvH4_1g16800	299.677	0.589083	0.295098	1.99623	0.0459092	0.0967491
FvH4_1g16840	71.7075	4.02632	0.910558	4.42182	9.7874e-06	6.27034e-05
FvH4_1g16841	0.384076	-0.529839	3.79228	-0.139715	0.888885	NA
FvH4_1g16860	58.1412	1.18026	0.439185	2.68738	0.00720156	0.0207505
FvH4_1g16861	191.615	1.47286	0.380238	3.87351	0.00010728	0.000535447
FvH4_1g16862	7.56675	1.88583	1.22457	1.53999	0.123562	0.212819
FvH4_1g16870	27.437	4.6186	1.09842	4.20476	2.61365e-05	0.000152319
FvH4_1g16871	48.7296	3.32626	0.477237	6.96983	3.17318e-12	5.60893e-11
FvH4_1g16890	50.7329	-0.951333	0.459498	-2.07037	0.0384173	0.0836614
FvH4_1g16891	9.13951	-0.878961	1.19041	-0.738369	0.46029	0.584144
FvH4_1g16910	313.05	-3.47994	0.404708	-8.59864	8.06688e-18	2.68521e-16
FvH4_1g16930	75.0056	1.76555	0.63736	2.7701	0.00560396	0.0167981
FvH4_1g16940	518.49	0.589921	0.413676	1.42605	0.153855	0.252811
FvH4_1g16950	15.2803	1.33643	0.577042	2.31599	0.0205585	0.0501694
FvH4_1g16960	138.773	-0.229055	0.298073	-0.768454	0.442218	0.56665
FvH4_1g16970	27.3209	2.17219	0.659186	3.29526	0.000983307	0.00377755
FvH4_1g16980	6.42435	-4.59934	1.50979	-3.04635	0.00231642	0.00791109
FvH4_1g16990	57.0233	-0.0732439	0.381407	-0.192036	0.847714	0.906034
FvH4_1g17000	687.922	-0.644553	0.414982	-1.55321	0.120373	0.20867
FvH4_1g17020	5.45125	5.06957	1.25987	4.02389	5.72451e-05	0.000306575
FvH4_1g17030	81.6125	0.748934	0.307423	2.43616	0.0148439	0.0381061
FvH4_1g17040	155.847	0.179515	0.267131	0.67201	0.501577	0.623271
FvH4_1g17050	390.389	0.0270677	0.195828	0.138221	0.890065	0.936016
FvH4_1g17060	240.886	1.20222	0.251031	4.78911	1.67523e-06	1.25633e-05
FvH4_1g17080	570.432	1.38805	1.03365	1.34287	0.179314	0.284578
FvH4_1g17100	503.602	1.0694	0.263882	4.05256	5.06601e-05	0.000275069
FvH4_1g17110	553.795	3.71179	0.244713	15.1679	5.76731e-52	3.32926e-49
FvH4_1g17120	148.574	1.91495	0.410086	4.66962	3.01761e-06	2.14499e-05
FvH4_1g17130	27.585	4.37685	0.88938	4.92124	8.59986e-07	6.83502e-06
FvH4_1g17140	356.91	1.2747	0.415017	3.07145	0.00213022	0.00735189
FvH4_1g17150	825.929	2.57576	0.820041	3.14102	0.00168363	0.00599839
FvH4_1g17190	124.428	-0.38621	0.345674	-1.11727	0.263881	0.383039
FvH4_1g17200	111.283	2.89381	0.340813	8.49089	2.05061e-17	6.52861e-16
FvH4_1g17210	10.564	1.66493	0.651907	2.55394	0.0106511	0.0288733
FvH4_1g17220	163.966	0.131562	0.281154	0.467936	0.63983	0.743396
FvH4_1g17230	393.058	-2.73575	0.246913	-11.0798	1.57168e-28	1.54603e-26
FvH4_1g17240	3446.66	-1.4301	0.581157	-2.46079	0.0138632	0.035997
FvH4_1g17250	1414.11	-0.43247	0.194691	-2.22132	0.0263294	0.0614104
FvH4_1g17270	308.31	3.40218	0.437205	7.78166	7.15777e-15	1.75042e-13
FvH4_1g17280	477.134	0.652844	0.288421	2.26351	0.0236041	0.0561828
FvH4_1g17290	105.162	3.69158	0.632698	5.83466	5.39002e-09	6.18063e-08
FvH4_1g17340	98.4808	3.20528	0.605865	5.29043	1.22028e-07	1.1233e-06
FvH4_1g17350	25.3502	2.11275	0.566885	3.72695	0.000193814	0.000906891
FvH4_1g17370	8.08181	9.42136	4.896	1.9243	0.0543171	0.110879
FvH4_1g17380	961.852	-0.858036	0.337653	-2.54118	0.0110479	0.0297248
FvH4_1g17390	1950.45	-1.73243	0.412873	-4.19604	2.71622e-05	0.000157377
FvH4_1g17400	56.6638	1.49359	0.314237	4.75307	2.00353e-06	1.47679e-05
FvH4_1g17410	612.363	0.228793	0.293463	0.779632	0.435608	0.560439
FvH4_1g17420	4.02464	8.41507	4.61921	1.82175	0.0684923	0.133314
FvH4_1g17440	178.884	1.93902	0.385425	5.03087	4.8825e-07	4.04222e-06
FvH4_1g17450	80.5018	-0.445592	0.742428	-0.600182	0.548385	0.665525
FvH4_1g17460	1.84976	7.28701	4.90898	1.48442	0.137697	0.23183
FvH4_1g17470	54.7565	-0.0633221	0.31835	-0.198907	0.842335	0.902132
FvH4_1g17480	118.477	-2.53563	0.402374	-6.30166	2.94469e-10	3.9972e-09
FvH4_1g17490	42.7729	0.340995	0.805068	0.42356	0.671887	0.76885
FvH4_1g17500	438.47	0.455944	0.627502	0.726601	0.46747	0.591101
FvH4_1g17510	148.023	0.0557789	0.558727	0.0998321	0.920478	0.957781
FvH4_1g17530	44.5736	1.07563	0.673783	1.59641	0.110398	0.194951
FvH4_1g17540	84.0331	-0.598012	0.250637	-2.38597	0.0170343	0.0427909
FvH4_1g17550	14.9215	-0.211382	0.6013	-0.351542	0.725182	0.811611
FvH4_1g17560	148.767	-1.6646	0.499509	-3.33248	0.00086077	0.00336755
FvH4_1g17570	245.799	-0.174837	0.244182	-0.71601	0.473985	0.597172
FvH4_1g17580	12.0632	-0.782804	0.745911	-1.04946	0.293967	0.4153
FvH4_1g17590	486.445	-0.572364	0.356121	-1.60722	0.108007	0.19167
FvH4_1g17610	294.867	-1.48737	0.338214	-4.39771	1.09397e-05	6.92961e-05
FvH4_1g17620	1095.64	-1.48782	0.650289	-2.28793	0.0221415	0.0533555
FvH4_1g17630	1772.68	-1.3026	0.351982	-3.70076	0.000214959	0.000996268
FvH4_1g17640	1329	0.274979	0.488008	0.563472	0.573114	0.687323
FvH4_1g17650	23.7903	0.745069	0.847867	0.878757	0.379533	0.505491
FvH4_1g17651	0.822671	-1.40836	2.87192	-0.49039	0.623858	NA
FvH4_1g17660	135.579	-0.167425	0.399032	-0.419579	0.674793	0.771337
FvH4_1g17670	55.369	0.104627	0.446266	0.234449	0.814636	0.881548
FvH4_1g17680	245.988	-0.0591539	0.208038	-0.284342	0.776149	0.852428
FvH4_1g17690	55.8826	0.765488	0.667335	1.14708	0.251348	0.369245
FvH4_1g17710	561.261	-0.719042	0.225911	-3.18285	0.00145831	0.00529538
FvH4_1g17720	164.015	0.935465	0.51395	1.82015	0.0687365	0.133635
FvH4_1g17740	105.056	0.53723	0.350865	1.53116	0.12573	0.215757
FvH4_1g17750	4.93578	1.28343	0.881583	1.45582	0.145441	0.242219
FvH4_1g17760	575.454	-1.14447	0.70911	-1.61395	0.106539	0.189698
FvH4_1g17780	109.909	2.92395	0.482144	6.06448	1.32383e-09	1.65373e-08
FvH4_1g17790	352.748	-0.520465	0.191398	-2.71928	0.00654241	0.0191233
FvH4_1g17800	660.543	-1.02904	0.29381	-3.5024	0.000461079	0.00195293
FvH4_1g17810	0.892188	1.74666	2.5334	0.689456	0.490536	0.612884
FvH4_1g17820	298.349	0.047415	0.274051	0.173015	0.862639	0.91661
FvH4_1g17821	1.86154	-2.00839	1.93758	-1.03655	0.299947	0.421946
FvH4_1g17830	6.80223	-4.50933	1.58139	-2.85151	0.00435125	0.0135716
FvH4_1g17840	1321.19	-2.60771	0.230879	-11.2947	1.39375e-29	1.53634e-27
FvH4_1g17850	515.085	-1.89837	0.311877	-6.08692	1.15105e-09	1.45028e-08
FvH4_1g17860	18.406	-0.88219	0.512031	-1.72292	0.0849022	0.158449
FvH4_1g17861	6.07517	-4.52781	1.68954	-2.6799	0.00736436	0.0211335
FvH4_1g17880	2.44312	1.16611	1.11049	1.05008	0.29368	0.415034
FvH4_1g17890	15.7126	-2.56269	0.720303	-3.55779	0.000373983	0.00162289
FvH4_1g17891	54.3486	-2.147	0.754804	-2.84444	0.00444894	0.0138154
FvH4_1g17910	1286.45	-7.35312	1.06203	-6.92367	4.40097e-12	7.69854e-11
FvH4_1g17920	543.12	0.811294	0.136243	5.95475	2.60464e-09	3.12557e-08
FvH4_1g17941	430.314	3.60622	0.348377	10.3515	4.11956e-25	2.87792e-23
FvH4_1g17950	23.2123	-2.34982	0.652013	-3.60395	0.000313417	0.00139088
FvH4_1g17951	5.90114	3.42697	1.71192	2.00183	0.0453031	0.0956742
FvH4_1g17953	11.9793	-1.27872	1.53419	-0.833487	0.40457	0.530368
FvH4_1g17970	204.604	-2.05478	0.322718	-6.36711	1.92627e-10	2.68454e-09
FvH4_1g17980	49.5765	1.15161	0.474816	2.42538	0.0152922	0.0390196
FvH4_1g18010	89.8193	-0.578095	0.228239	-2.53285	0.0113139	0.030341
FvH4_1g18020	12.61	0.337543	0.983581	0.343178	0.731465	0.816602
FvH4_1g18030	52.8253	1.33914	0.361501	3.70439	0.000211901	0.000983759
FvH4_1g18040	0.874187	1.54098	2.15286	0.71578	0.474127	NA
FvH4_1g18060	459.04	0.390012	0.484612	0.804791	0.42094	0.546581
FvH4_1g18070	1133.32	-0.272061	0.565148	-0.481397	0.630234	0.735558
FvH4_1g18080	384.783	0.404565	0.30823	1.31254	0.189338	0.296983
FvH4_1g18090	49.447	0.0451271	0.497238	0.0907554	0.927687	0.96239
FvH4_1g18100	6.84209	3.24029	1.16459	2.78234	0.00539681	0.0163011
FvH4_1g18110	2.94103	-0.349999	1.31096	-0.266979	0.789486	0.863103
FvH4_1g18111	6.43581	-3.51352	1.67149	-2.10203	0.0355505	0.0786363
FvH4_1g18121	3.2426	0.199509	1.72376	0.115741	0.907858	0.948558
FvH4_1g18140	7.43198	2.37759	1.12889	2.10612	0.035194	0.0779263
FvH4_1g18141	0.696866	1.07329	3.49998	0.306657	0.759104	NA
FvH4_1g18143	2.32202	-0.296492	1.64795	-0.179915	0.857219	0.913079
FvH4_1g18160	27.6907	-0.554899	1.37284	-0.404197	0.686068	0.780176
FvH4_1g18170	754.902	-1.88724	0.9084	-2.07754	0.0377516	0.0825641
FvH4_1g18181	81.2231	-0.572442	1.15253	-0.496681	0.619414	0.727069
FvH4_1g18210	75.4887	0.115508	0.576774	0.200265	0.841273	0.901347
FvH4_1g18220	10.4177	8.78775	1.55365	5.65618	1.54775e-08	1.66756e-07
FvH4_1g18230	95.162	2.75059	0.250328	10.9879	4.36857e-28	4.16647e-26
FvH4_1g18250	252.219	0.547827	0.373467	1.46687	0.142412	0.238069
FvH4_1g18251	80.4191	3.52008	0.359812	9.78312	1.33041e-22	7.33262e-21
FvH4_1g18260	34.1193	0	2.14398	0	1	1
FvH4_1g18270	58.1499	1.36471	1.24336	1.0976	NA	NA
FvH4_1g18280	64.3074	1.17172	0.788351	1.48629	0.137203	0.231194
FvH4_1g18300	588.925	2.55736	0.329904	7.75183	9.05789e-15	2.19067e-13
FvH4_1g18320	67.8864	-0.0751979	0.552604	-0.136079	0.891759	0.936994
FvH4_1g18321	3.63581	0	4.05291	0	1	1
FvH4_1g18350	382.846	-0.50907	0.238422	-2.13517	0.0327474	0.0734057
FvH4_1g18360	776.288	-0.778257	0.353262	-2.20306	0.0275907	0.0638764
FvH4_1g18370	18.9967	-0.252865	0.533195	-0.474245	0.635325	0.739663
FvH4_1g18413	38.7477	-0.310503	0.537866	-0.577287	0.563745	0.679356
FvH4_1g18420	2.82509	-4.76295	1.79551	-2.6527	0.00798516	0.0226308
FvH4_1g18480	73.1064	-0.804829	0.435759	-1.84696	0.0647532	0.127335
FvH4_1g18481	1.19523	0.483412	2.20207	0.219526	0.82624	0.890174
FvH4_1g18482	2.00663	-0.447479	1.44552	-0.309563	0.756893	0.836518
FvH4_1g18500	2.45738	7.70193	4.90479	1.57029	0.116348	0.203227
FvH4_1g18510	397.892	0.991782	0.243545	4.07227	4.65581e-05	0.000255836
FvH4_1g18512	698.12	0.610227	0.405429	1.50514	0.132288	0.224482
FvH4_1g18520	516.384	0.533042	0.237745	2.24207	0.0249566	0.0587832
FvH4_1g18530	179.787	2.70404	0.645832	4.1869	2.82784e-05	0.000163198
FvH4_1g18540	58.5111	-0.155014	0.679149	-0.228247	0.819454	0.884928
FvH4_1g18550	521.606	1.27072	0.348357	3.64775	0.000264545	0.00119306
FvH4_1g18560	267.866	0.822923	0.62439	1.31796	0.187516	0.294632
FvH4_1g18570	0.590235	2.10231	2.56763	0.818775	0.412915	NA
FvH4_1g18590	4.54658	5.96242	1.8332	3.25246	0.00114409	0.00430106
FvH4_1g18591	732.928	0.814759	0.213824	3.81042	0.000138732	0.000671795
FvH4_1g18620	955.131	-0.455006	0.423932	-1.0733	0.283136	0.40366
FvH4_1g18630	40.3424	7.86709	1.13852	6.9099	4.84989e-12	8.39677e-11
FvH4_1g18640	8.53344	-0.522787	0.878313	-0.595217	0.551698	0.66829
FvH4_1g18650	1.74184	2.10069	1.48366	1.41588	0.15681	0.256585
FvH4_1g18660	10144	-0.130504	0.685827	-0.190287	0.849084	0.906924
FvH4_1g18670	34.7112	1.28104	0.385656	3.32171	0.000894683	0.00348098
FvH4_1g18690	1592.49	-0.526719	0.23028	-2.2873	0.0221785	0.0534095
FvH4_1g18710	550.059	1.766	0.62742	2.8147	0.0048823	0.0149725
FvH4_1g18740	1.81569	4.62918	2.50007	1.85162	0.0640802	0.126261
FvH4_1g18760	259.047	1.82315	0.327585	5.56543	2.61514e-08	2.72392e-07
FvH4_1g18770	196.389	0.638297	0.359245	1.77677	0.0756056	0.144291
FvH4_1g18801	4.32733	4.07666	1.12201	3.63335	0.000279768	0.00125373
FvH4_1g18810	161.169	-0.136148	0.365996	-0.371994	0.709897	0.799113
FvH4_1g18820	506.211	0.857365	0.230403	3.72116	0.000198313	0.000925376
FvH4_1g18830	140.405	-0.300171	0.272275	-1.10246	0.270263	0.389904
FvH4_1g18831	4.05887	-0.489431	1.19853	-0.408358	0.683011	0.777987
FvH4_1g18840	9.74436	0.771963	0.692609	1.11457	0.265034	0.384204
FvH4_1g18850	339.881	2.35606	0.402228	5.85753	4.69801e-09	5.42684e-08
FvH4_1g18870	7.37813	-0.550746	0.980826	-0.561512	0.574448	0.688622
FvH4_1g18880	6.98526	-0.452505	0.924393	-0.489515	0.624477	0.731056
FvH4_1g18890	238.956	-0.437645	0.292493	-1.49626	0.134586	0.227607
FvH4_1g18891	380.508	0.968861	0.874925	1.10736	0.268136	0.387473
FvH4_1g18900	1947.68	-0.996437	0.427053	-2.33329	0.0196332	0.048233
FvH4_1g18910	52.1198	3.1549	1.05658	2.98597	0.00282681	0.00937256
FvH4_1g18920	7.83601	1.0945	0.793971	1.37851	0.168045	0.27053
FvH4_1g18930	209.595	-1.02119	0.599251	-1.70411	0.088361	0.163513
FvH4_1g18940	1357.94	-0.570003	0.338908	-1.68188	0.092592	0.1696
FvH4_1g18950	101.704	1.12141	0.749498	1.49622	0.134596	0.227607
FvH4_1g18970	1713.6	-0.875487	0.507363	-1.72556	0.084426	0.157762
FvH4_1g18980	110.433	0.0210272	0.426125	0.0493451	0.960644	0.983506
FvH4_1g18990	120.517	1.22167	0.309212	3.95092	7.7851e-05	0.000402389
FvH4_1g19010	54.3856	0.337826	0.295437	1.14348	0.25284	0.371015
FvH4_1g19030	1.84332	-0.592913	1.48133	-0.400257	0.688967	0.782458
FvH4_1g19040	139.072	-1.15463	0.361737	-3.19191	0.00141333	0.00515168
FvH4_1g19050	1380.26	0.131602	0.207261	0.634958	0.525456	0.644833
FvH4_1g19090	1347.57	2.62078	0.502585	5.21461	1.84208e-07	1.64527e-06
FvH4_1g19100	10.0648	8.64529	1.61036	5.36853	7.93789e-08	7.5641e-07
FvH4_1g19111	1.21371	0.156568	2.88186	0.0543289	0.956673	0.981419
FvH4_1g19120	31.6181	-4.90303	1.143	-4.28961	1.78983e-05	0.000108278
FvH4_1g19140	20.3182	-0.471085	0.610786	-0.771277	0.440543	0.565182
FvH4_1g19141	12.7324	-6.00663	1.58345	-3.79339	0.000148607	0.000714862
FvH4_1g19142	26.8962	-6.95335	1.56786	-4.43493	9.21007e-06	5.93514e-05
FvH4_1g19160	1.54185	-0.949381	1.8189	-0.521954	0.601702	0.712878
FvH4_1g19171	9.01037	0.748904	1.00768	0.743199	0.457361	0.581436
FvH4_1g19194	4.92326	4.35436	1.30814	3.32866	0.000872657	0.00340434
FvH4_1g19210	5528.68	0.601509	0.556213	1.08144	0.279503	0.399555
FvH4_1g19240	1064.47	-1.8027	2.22457	-0.81036	0.417733	0.543274
FvH4_1g19261	610.405	4.7963	0.567456	8.45228	2.85667e-17	8.952e-16
FvH4_1g19262	12.259	0.181705	1.84763	0.0983451	0.921658	0.95843
FvH4_1g19265	5874.96	-3.3911	1.76546	-1.92081	0.0547559	0.111608
FvH4_1g19280	159.444	1.07331	2.06005	0.521014	0.602357	0.713346
FvH4_1g19281	18190.3	1.83216	0.398758	4.59467	4.33443e-06	2.98524e-05
FvH4_1g19290	90.5144	-1.45566	0.595875	-2.4429	0.0145698	0.0375123
FvH4_1g19310	10.9241	6.0812	1.57797	3.85381	0.000116296	0.000574654
FvH4_1g19311	36.5	2.42253	0.597833	4.05218	5.0743e-05	0.000275451
FvH4_1g19312	1.01439	-0.721875	2.42958	-0.297119	0.766375	0.844435
FvH4_1g19320	141.763	0.389773	0.596067	0.653908	0.513171	0.633963
FvH4_1g19321	25.4389	1.06704	0.574475	1.85742	0.0632516	0.124999
FvH4_1g19330	189.982	0.477127	0.245597	1.94273	0.0520494	0.107066
FvH4_1g19340	251.582	-2.87504	0.493228	-5.82903	5.57493e-09	6.376e-08
FvH4_1g19380	11.4907	-2.136	1.02774	-2.07836	0.0376765	0.0824329
FvH4_1g19381	0.807787	1.07329	2.88815	0.371619	0.710177	NA
FvH4_1g19382	2.42681	0.182478	2.52175	0.0723616	0.942314	0.971774
FvH4_1g19390	449.815	-3.26995	0.606497	-5.39153	6.98595e-08	6.75083e-07
FvH4_1g19400	230.307	-7.35107	1.58571	-4.63584	3.55497e-06	2.49015e-05
FvH4_1g19420	0.84799	5.02168	4.93345	1.01789	0.308733	NA
FvH4_1g19460	13.2422	8.55916	1.43244	5.97522	2.29785e-09	2.78024e-08
FvH4_1g19470	67.2479	1.43421	0.499449	2.87159	0.00408416	0.01285
FvH4_1g19471	159.954	0.72377	0.297458	2.43318	0.0149668	0.0383543
FvH4_1g19480	183.422	8.29797	0.799706	10.3763	3.17956e-25	2.25602e-23
FvH4_1g19490	159.627	1.75292	0.586655	2.98799	0.00280822	0.00932502
FvH4_1g19500	57.0635	1.48544	0.649768	2.28612	0.0222475	0.0535286
FvH4_1g19520	149.862	-0.330404	0.413376	-0.799281	0.424127	0.549829
FvH4_1g19530	17.8381	-4.18346	1.02266	-4.09075	4.29976e-05	0.00023782
FvH4_1g19540	16.3179	5.23447	0.816851	6.4081	1.47343e-10	2.09334e-09
FvH4_1g19550	128.112	3.9642	0.736371	5.38342	7.30824e-08	7.02206e-07
FvH4_1g19561	0.820526	1.48272	2.89819	0.511603	0.608929	NA
FvH4_1g19562	13.846	-2.99149	1.62343	-1.8427	0.0653728	0.128301
FvH4_1g19563	67.2217	-0.103445	0.481033	-0.215048	0.82973	0.892991
FvH4_1g19570	43.5843	-0.201589	0.499839	-0.403307	0.686722	0.780717
FvH4_1g19590	215.658	-0.0654155	0.305998	-0.213778	0.83072	0.893831
FvH4_1g19600	58.3806	0.311226	0.644516	0.482884	0.629178	0.734731
FvH4_1g19610	197	0.548516	0.439497	1.24805	0.212011	0.323751
FvH4_1g19620	193.126	-0.36256	0.538438	-0.673355	0.500722	0.62249
FvH4_1g19623	2.38613	1.42446	1.46341	0.973383	0.330363	0.454909
FvH4_1g19630	188.678	0.541411	0.483237	1.12038	0.26255	0.381487
FvH4_1g19631	2.574	3.23143	2.13219	1.51555	0.129634	0.2209
FvH4_1g19640	83.2914	0.60016	0.446534	1.34404	0.178935	0.284099
FvH4_1g19670	241.294	0.820588	0.417198	1.9669	0.0491947	0.102414
FvH4_1g19680	708.935	-0.132682	0.32397	-0.409549	0.682137	0.777262
FvH4_1g19690	551.58	2.6652	0.302296	8.81652	1.18077e-18	4.31689e-17
FvH4_1g19710	34.9523	10.5643	1.31356	8.04249	8.80329e-16	2.35786e-14
FvH4_1g19720	461.654	1.29819	0.236636	5.48601	4.11103e-08	4.14237e-07
FvH4_1g19730	523.309	0.364004	0.369958	0.983905	0.325162	0.449053
FvH4_1g19740	125.538	0.0206403	0.312296	0.0660922	0.947304	0.975224
FvH4_1g19770	0.646059	0.832661	3.82496	0.217692	0.827669	NA
FvH4_1g19790	20.0806	6.72776	0.990589	6.79168	1.10832e-11	1.83074e-10
FvH4_1g19810	1.25846	4.04831	2.14429	1.88795	0.0590329	0.118555
FvH4_1g19820	77.6396	-0.260025	0.338832	-0.767416	0.442834	0.567241
FvH4_1g19830	246.887	0.324143	0.174489	1.85768	0.0632151	0.124938
FvH4_1g19840	2699.82	-0.732424	0.351424	-2.08416	0.0371453	0.0814818
FvH4_1g19860	36.9966	0.159266	0.345508	0.460962	0.644826	0.747063
FvH4_1g19880	27.6358	-0.964782	0.723329	-1.33381	0.182267	0.288179
FvH4_1g19890	325.807	0.27274	0.353147	0.772312	0.43993	0.564576
FvH4_1g19920	993.489	-0.308404	0.408413	-0.755127	0.450173	0.574295
FvH4_1g19921	4.61749	0.191959	1.1008	0.174381	0.861566	0.916064
FvH4_1g19960	8.89051	-3.06956	1.63325	-1.87942	0.0601869	0.120341
FvH4_1g19970	133.371	-0.115892	0.399189	-0.290319	0.771572	0.848765
FvH4_1g19980	317.587	-0.48142	0.253317	-1.90046	0.0573721	0.115914
FvH4_1g19990	180.329	1.15227	0.615065	1.87342	0.0610108	0.121612
FvH4_1g20010	252.248	11.4937	0.842082	13.6491	2.04402e-42	5.97835e-40
FvH4_1g20030	9.6497	8.42581	2.0461	4.11799	3.82193e-05	0.000213982
FvH4_1g20040	8.17864	0.83886	0.990305	0.847073	0.396955	0.523035
FvH4_1g20050	319.353	-0.500223	0.209655	-2.38594	0.0170356	0.0427909
FvH4_1g20060	1830.06	-0.614075	0.469785	-1.30714	0.191164	0.299164
FvH4_1g20090	22.6919	-1.08813	0.468615	-2.322	0.0202327	0.0494677
FvH4_1g20100	154.164	1.49549	0.579999	2.57843	0.00992503	0.0272076
FvH4_1g20110	27.3942	3.34612	0.727476	4.59963	4.23247e-06	2.92145e-05
FvH4_1g20130	23.7889	-5.44732	1.36852	-3.98044	6.87884e-05	0.000360473
FvH4_1g20140	296.107	-0.736319	0.507471	-1.45096	0.146792	0.24385
FvH4_1g20150	61.9668	-0.160579	0.368474	-0.435794	0.662986	0.762105
FvH4_1g20160	45.8301	6.8061	1.32827	5.12404	2.99057e-07	2.56957e-06
FvH4_1g20164	273.864	0.0897048	0.221353	0.405257	0.685288	0.779531
FvH4_1g20180	17.0623	-5.28475	1.34819	-3.91988	8.85917e-05	0.000451941
FvH4_1g20190	203.627	-4.41199	0.458627	-9.61999	6.584e-22	3.44693e-20
FvH4_1g20200	343.694	0.520699	0.257924	2.01881	0.0435069	0.0925313
FvH4_1g20220	195.451	0.838729	0.204941	4.09254	4.26679e-05	0.000236116
FvH4_1g20221	189.096	-0.260972	0.339013	-0.7698	0.441418	0.56599
FvH4_1g20230	3117.42	-0.505492	0.270281	-1.87024	0.0614499	0.122264
FvH4_1g20240	373.428	-2.68868	0.379669	-7.08163	1.42468e-12	2.63505e-11
FvH4_1g20250	345.286	0.0609344	0.258127	0.236064	0.813383	0.88067
FvH4_1g20260	505.209	0.620337	0.189738	3.26945	0.00107758	0.00409243
FvH4_1g20270	5217.02	2.69575	0.443222	6.08216	1.18575e-09	1.49058e-08
FvH4_1g20280	12.8557	0.934574	0.556919	1.67811	0.0933247	0.17074
FvH4_1g20290	71.7871	0.438268	0.705909	0.620857	0.534694	0.653101
FvH4_1g20300	2160.05	-1.26619	0.476656	-2.6564	0.00789795	0.0224329
FvH4_1g20310	869.132	-0.625165	0.248581	-2.51493	0.0119055	0.0316749
FvH4_1g20311	1.22384	4.62267	2.79597	1.65333	0.0982633	0.17806
FvH4_1g20330	1.10343	-0.728673	2.27183	-0.320743	0.748405	0.829561
FvH4_1g20340	2238.41	-0.796122	0.249409	-3.19204	0.00141274	0.00515037
FvH4_1g20350	3.4524	-0.522888	1.33979	-0.390277	0.696331	0.788236
FvH4_1g20360	318.554	-3.85345	0.340055	-11.3318	9.12821e-30	1.01643e-27
FvH4_1g20370	438.493	-0.256193	0.184228	-1.39063	0.164338	0.266007
FvH4_1g20380	626.092	-0.480224	0.545284	-0.880686	0.378488	0.504313
FvH4_1g20390	131.746	1.3159	0.628333	2.09427	0.0362362	0.0798952
FvH4_1g20400	313.972	0.0965594	0.688983	0.140148	0.888543	0.935049
FvH4_1g20410	23.5826	8.32673	1.16977	7.11823	1.0932e-12	2.05665e-11
FvH4_1g20420	42.512	-1.02435	0.629883	-1.62626	0.103894	0.18603
FvH4_1g20430	28.8386	0.446902	0.505344	0.884352	0.376506	0.502191
FvH4_1g20440	148.115	0.273507	0.241308	1.13344	0.257031	0.375639
FvH4_1g20450	2647.37	3.69889	0.662185	5.58588	2.32514e-08	2.4404e-07
FvH4_1g20470	7.7316	-2.27959	2.18825	-1.04174	0.297531	0.419262
FvH4_1g20490	419.404	1.63875	0.350753	4.67208	2.98162e-06	2.12146e-05
FvH4_1g20510	54.7453	-0.754687	0.407621	-1.85144	0.0641057	0.126288
FvH4_1g20520	247.79	-1.03979	0.253719	-4.09819	4.16386e-05	0.000231086
FvH4_1g20540	0.9021	-1.13365	2.61999	-0.432691	0.665239	0.763695
FvH4_1g20560	20.7461	4.68036	0.703712	6.65096	2.91178e-11	4.54935e-10
FvH4_1g20570	104.17	6.40126	0.538186	11.8941	1.26955e-32	1.70852e-30
FvH4_1g20572	11.0211	-0.831044	1.94628	-0.426992	0.669385	0.76713
FvH4_1g20573	2.08405	0	2.76575	0	1	1
FvH4_1g20600	8.23515	2.1492	0.892317	2.40856	0.0160156	0.0405718
FvH4_1g20610	34.802	1.43594	0.429278	3.34501	0.000822799	0.00323689
FvH4_1g20620	3.02465	1.10316	1.08018	1.02127	0.307126	0.429608
FvH4_1g20630	19.0146	0.114969	0.58109	0.197851	0.843162	0.902655
FvH4_1g20640	555.832	-0.149517	0.287054	-0.520866	0.60246	0.713429
FvH4_1g20670	534.478	-0.676615	0.357278	-1.8938	0.0582512	0.117261
FvH4_1g20680	3.99506	6.3067	2.31362	2.7259	0.00641265	0.018821
FvH4_1g20700	322.888	0.450106	0.316874	1.42046	0.155475	0.254952
FvH4_1g20710	367.658	3.17839	0.344461	9.22714	2.77951e-20	1.19787e-18
FvH4_1g20720	361.374	-0.862352	0.185716	-4.6434	3.42724e-06	2.4073e-05
FvH4_1g20721	47.9094	-2.80878	0.50328	-5.58095	2.39204e-08	2.50702e-07
FvH4_1g20730	637.613	0.295501	0.223064	1.32474	0.185258	0.291815
FvH4_1g20740	155.47	-0.5354	0.362502	-1.47696	0.139687	0.234565
FvH4_1g20750	0.834119	2.508	2.01898	1.24221	0.214159	NA
FvH4_1g20790	653.551	-0.00669497	0.308726	-0.0216858	0.982699	0.998562
FvH4_1g20800	180.954	-0.0215049	0.204175	-0.105326	0.916117	0.954495
FvH4_1g20810	41.4438	0.0791364	0.524107	0.150993	0.879981	0.92889
FvH4_1g20820	51.4509	1.1624	0.292951	3.96789	7.2511e-05	0.000377571
FvH4_1g20821	52.1702	-1.6233	0.475159	-3.41633	0.000634708	0.00258215
FvH4_1g20830	17.6542	-2.02205	0.982141	-2.05882	0.0395118	0.0855946
FvH4_1g20840	79.8389	-0.35905	0.627832	-0.571889	0.567397	0.682263
FvH4_1g20860	22.6007	4.59662	0.659465	6.97023	3.16426e-12	5.59769e-11
FvH4_1g20880	280.054	-0.00661969	0.40113	-0.0165026	0.986833	1
FvH4_1g20890	312.694	-1.27728	0.378273	-3.37662	0.00073382	0.00293047
FvH4_1g20891	2.98777	-0.511044	1.42187	-0.359416	0.719284	0.806822
FvH4_1g20900	8.07641	-0.135006	1.15755	-0.116631	0.907153	0.94815
FvH4_1g20910	492.804	-0.0849161	0.315739	-0.268944	0.787973	0.861664
FvH4_1g20920	144.558	0.547682	0.415047	1.31957	0.186979	0.293909
FvH4_1g20930	2424.34	-0.738812	0.416722	-1.77291	0.0762432	0.145319
FvH4_1g20950	296.692	-0.325429	0.262696	-1.23881	0.215417	0.327628
FvH4_1g20970	47.6699	0.267945	0.676961	0.395805	0.692249	0.785169
FvH4_1g21000	4.80518	8.41755	1.82814	4.60444	4.13573e-06	2.86007e-05
FvH4_1g21001	3.27323	1.23306	1.24129	0.993368	0.320531	0.444279
FvH4_1g21020	148.32	0.458342	0.609418	0.752098	0.451992	0.576046
FvH4_1g21070	217.874	0.678332	0.375207	1.80789	0.070624	0.136639
FvH4_1g21100	4.15669	7.46766	2.46911	3.02444	0.00249094	0.00842709
FvH4_1g21110	317.867	-0.485331	0.545082	-0.890382	0.373261	0.499229
FvH4_1g21130	115.086	0.0854656	0.370447	0.230709	0.817541	0.88377
FvH4_1g21140	10.6606	1.2254	0.671864	1.82388	0.0681709	0.132794
FvH4_1g21150	332.62	-1.09869	0.738084	-1.48856	0.136602	0.230412
FvH4_1g21170	3.59493	0.517541	1.34639	0.384393	0.700688	0.79163
FvH4_1g21180	1.74423	-1.87545	4.27885	-0.438307	0.661164	0.760803
FvH4_1g21190	7.82384	-0.796568	0.819267	-0.972293	0.330905	0.455407
FvH4_1g21200	240.216	-1.39593	0.737615	-1.89249	0.0584254	0.117547
FvH4_1g21201	0.763272	-0.654633	2.22349	-0.294417	0.768439	NA
FvH4_1g21210	429.771	0.712975	0.405207	1.75953	0.0784868	0.148755
FvH4_1g21220	23.625	-1.19521	0.575538	-2.07669	0.0378304	0.082687
FvH4_1g21221	0.447493	-1.61209	3.18711	-0.505815	0.612986	NA
FvH4_1g21240	50.5625	-1.41663	0.395449	-3.58232	0.000340556	0.0014923
FvH4_1g21250	815.843	-1.76473	0.36568	-4.8259	1.39371e-06	1.06007e-05
FvH4_1g21260	69.8514	-0.683153	0.459839	-1.48563	0.137376	0.231414
FvH4_1g21290	1.99568	1.61736	1.70051	0.951105	0.341551	0.467157
FvH4_1g21310	11.1108	-2.68249	1.1622	-2.30812	0.0209926	0.0510464
FvH4_1g21340	30.4423	-1.22625	0.878959	-1.39512	0.16298	0.264373
FvH4_1g21360	0.984791	4.00847	2.57555	1.55635	0.119624	0.2077
FvH4_1g21402	52.9716	-1.81041	0.924438	-1.95839	0.0501848	0.103942
FvH4_1g21410	56.5776	-0.996817	0.377146	-2.64306	0.00821617	0.0231598
FvH4_1g21430	408.509	-0.339686	0.264573	-1.2839	0.199177	0.308686
FvH4_1g21440	907.451	-0.570164	0.303481	-1.87875	0.0602789	0.120492
FvH4_1g21450	5300.37	-0.827929	0.810556	-1.02143	0.307049	0.429585
FvH4_1g21480	12.1325	-2.13506	1.20056	-1.77838	0.0753419	0.143851
FvH4_1g21490	5.56748	1.46331	0.916445	1.59673	0.110327	0.194936
FvH4_1g21500	564.693	-0.320994	0.293933	-1.09206	0.274805	0.394872
FvH4_1g21520	1.77959	0.250676	1.36273	0.183952	0.854051	0.910722
FvH4_1g21530	209.462	-0.29867	0.375179	-0.796075	0.425989	0.551525
FvH4_1g21540	15.8211	1.7595	0.789506	2.22861	0.0258401	0.0604876
FvH4_1g21600	31.5127	-3.40015	0.728409	-4.66791	3.04278e-06	2.16078e-05
FvH4_1g21630	180.467	3.80091	0.412745	9.20885	3.29623e-20	1.41776e-18
FvH4_1g21640	40.2622	0.424794	0.549369	0.773241	0.43938	0.56407
FvH4_1g21650	67.0889	-0.175076	0.353749	-0.494915	0.62066	0.727986
FvH4_1g21660	1148.42	0.556636	0.549528	1.01293	0.311091	0.433965
FvH4_1g21670	453.709	-0.241416	0.299813	-0.80522	0.420693	0.546378
FvH4_1g21690	89.0783	0.255333	0.336777	0.758166	0.448352	0.572504
FvH4_1g21700	52.5254	-0.505627	0.647547	-0.780833	0.434901	0.559759
FvH4_1g21730	287.032	0.489267	0.549788	0.88992	0.373509	0.499408
FvH4_1g21740	815.881	1.22621	0.573496	2.13814	0.0325055	0.072938
FvH4_1g21750	306.514	-0.315942	0.396194	-0.797443	0.425194	0.55082
FvH4_1g21760	144.643	1.13801	0.571913	1.98983	0.0466097	0.0979808
FvH4_1g21770	47.6856	-1.99175	0.900768	-2.21117	0.0270239	0.0627961
FvH4_1g21780	68.0522	-2.90872	0.705624	-4.12219	3.75286e-05	0.000210598
FvH4_1g21810	153.062	1.06019	0.296027	3.58138	0.000341785	0.00149708
FvH4_1g21830	5.91117	-0.728188	1.58336	-0.459902	0.645587	0.747708
FvH4_1g21840	265.959	0.157108	0.51386	0.305741	0.759802	0.839014
FvH4_1g21870	299.554	1.01018	0.457898	2.20613	0.0273751	0.0634953
FvH4_1g21880	10.1997	-2.4274	1.14063	-2.12812	0.033327	0.074469
FvH4_1g21890	682.939	1.59906	0.527975	3.02867	0.00245636	0.00832038
FvH4_1g21900	208.609	-1.56235	0.548699	-2.84738	0.00440804	0.0137156
FvH4_1g21910	180.642	-0.330635	0.245831	-1.34497	0.178634	0.283704
FvH4_1g21920	875.439	-3.42176	0.31118	-10.9961	3.99097e-28	3.82297e-26
FvH4_1g21921	1.38384	0.864558	1.83926	0.470059	0.638313	0.742105
FvH4_1g21940	32.7065	1.70026	0.44868	3.78946	0.000150972	0.000724509
FvH4_1g21941	2.95914	2.43104	1.58953	1.52941	0.126163	0.21633
FvH4_1g21950	130.773	0.115728	0.48938	0.236479	0.813061	0.880495
FvH4_1g21970	122.074	-0.508113	0.287006	-1.77039	0.0766615	0.146014
FvH4_1g21980	16.2619	1.1357	0.6163	1.84278	0.0653617	0.12829
FvH4_1g22020	196.39	-3.41389	1.44645	-2.36019	0.0182654	0.0454068
FvH4_1g22042	6.41171	-1.37117	0.962638	-1.42439	0.154334	0.253403
FvH4_1g22043	19.2907	0.925707	0.489681	1.89043	0.0587008	0.118026
FvH4_1g22044	17.9703	1.24214	0.665682	1.86597	0.0620456	0.12317
FvH4_1g22060	149.343	1.37359	0.502033	2.73605	0.0062182	0.0183583
FvH4_1g22080	882.342	2.03765	0.297448	6.85043	7.36277e-12	1.24047e-10
FvH4_1g22090	103.676	0.218425	0.419629	0.520521	0.602701	0.713637
FvH4_1g22100	11.1996	-0.218266	0.72755	-0.300002	0.764176	0.842656
FvH4_1g22110	7.48015	-2.48254	1.70364	-1.4572	0.145062	0.241707
FvH4_1g22140	337.133	-1.30111	0.437042	-2.97708	0.00291006	0.00962385
FvH4_1g22150	410.541	-0.0919508	0.514688	-0.178654	0.85821	0.913782
FvH4_1g22160	23.108	0.0503551	0.472105	0.106661	0.915058	0.953602
FvH4_1g22161	127.741	0.0860662	0.348961	0.246635	0.80519	0.874822
FvH4_1g22170	104.778	0.447606	0.261635	1.7108	0.0871181	0.161704
FvH4_1g22180	1.31288	4.24417	3.1481	1.34817	0.177605	0.282581
FvH4_1g22200	215.221	-1.63119	0.358262	-4.55307	5.2868e-06	3.58157e-05
FvH4_1g22210	34.9905	0.261228	0.515654	0.506595	0.612439	0.721778
FvH4_1g22220	717.396	-2.78822	0.547337	-5.09416	3.50292e-07	2.96837e-06
FvH4_1g22221	2.7963	-0.687178	1.65251	-0.415838	0.677528	0.773391
FvH4_1g22230	447.58	0.388303	0.2432	1.59664	0.110346	0.194941
FvH4_1g22240	569.846	1.22619	0.396789	3.09028	0.00199971	0.0069617
FvH4_1g22250	293.445	0.313369	0.359896	0.87072	0.383907	0.510201
FvH4_1g22260	64.4703	4.24097	0.38637	10.9765	4.96031e-28	4.68799e-26
FvH4_1g22270	49.5106	0.159389	0.461331	0.345498	0.72972	0.81511
FvH4_1g22290	121.517	-0.496312	0.43594	-1.13849	0.254917	0.373363
FvH4_1g22291	197.282	0.0917751	0.597163	0.153685	0.877858	0.927497
FvH4_1g22320	23.9007	5.10841	0.652102	7.83376	4.73487e-15	1.17228e-13
FvH4_1g22350	48.7308	-0.628692	0.729662	-0.861621	0.388896	0.515551
FvH4_1g22390	15.2758	-6.83029	1.50998	-4.52342	6.08493e-06	4.06205e-05
FvH4_1g22400	5.98119	1.73874	0.880666	1.97434	0.0483427	0.100908
FvH4_1g22401	5.89291	-4.69501	1.5023	-3.12521	0.00177678	0.00628028
FvH4_1g22410	50.09	-0.326867	0.426614	-0.766189	0.443564	0.567811
FvH4_1g22430	28.9267	1.28138	0.655676	1.95429	0.0506674	0.104764
FvH4_1g22440	1397.02	-0.432557	0.486174	-0.889717	0.373618	0.499523
FvH4_1g22450	215.633	-0.232287	0.43293	-0.536546	0.591581	0.704425
FvH4_1g22460	44.6144	-0.4207	0.514362	-0.817907	0.41341	0.539411
FvH4_1g22461	10.1058	0.723587	0.687441	1.05258	0.292533	0.41384
FvH4_1g22470	145.643	0.986526	0.492197	2.00433	0.0450346	0.0952264
FvH4_1g22471	20.4328	-0.138504	0.70872	-0.195428	0.845058	0.9039
FvH4_1g22472	20.9745	-0.495301	0.949809	-0.521474	0.602037	0.713197
FvH4_1g22490	110.061	11.5288	1.45481	7.92463	2.28819e-15	5.8775e-14
FvH4_1g22500	3.53786	-1.32037	1.69865	-0.777304	0.436979	0.561842
FvH4_1g22510	6.20019	1.1278	1.01917	1.10659	0.268471	0.387855
FvH4_1g22550	5.9736	0.7988	0.858651	0.930297	0.352218	0.477991
FvH4_1g22570	604.821	-1.48684	0.539194	-2.75752	0.00582415	0.0173444
FvH4_1g22580	418.66	-1.57072	0.569674	-2.75723	0.00582935	0.0173575
FvH4_1g22590	1326.98	-0.411573	0.284175	-1.44831	0.14753	0.244834
FvH4_1g22591	761.044	0.154005	0.32713	0.470775	0.637801	0.741667
FvH4_1g22620	422.577	1.56322	0.356591	4.38379	1.16631e-05	7.3349e-05
FvH4_1g22650	352.765	-1.18087	0.303349	-3.89279	9.90974e-05	0.000497893
FvH4_1g22670	56.9189	-0.581437	0.479127	-1.21353	0.224926	0.338941
FvH4_1g22680	179.074	1.32628	0.495198	2.67827	0.00740026	0.0212227
FvH4_1g22681	3.58895	4.15002	2.02056	2.0539	0.0399852	0.0864237
FvH4_1g22710	201.196	0.166855	0.444996	0.374957	0.707692	0.797648
FvH4_1g22720	160.306	0.274803	0.554467	0.495615	0.620166	0.727644
FvH4_1g22730	137.33	-1.39509	0.509066	-2.74049	0.00613476	0.0181511
FvH4_1g22740	148.287	-0.921268	0.438022	-2.10325	0.0354442	0.0784249
FvH4_1g22750	1029.09	-1.24238	0.433754	-2.86426	0.0041798	0.0131039
FvH4_1g22760	2.72696	-3.48827	1.90663	-1.82955	0.0673174	0.131342
FvH4_1g22770	160.328	0.140747	0.566621	0.248396	0.803828	0.873558
FvH4_1g22780	162.66	0.948357	0.724653	1.30871	0.190634	0.298419
FvH4_1g22810	367.216	-0.171765	0.345315	-0.497415	0.618897	0.726617
FvH4_1g22820	44.0907	1.4621	0.497393	2.93952	0.0032872	0.0106527
FvH4_1g22830	0.457822	-2.39092	4.7598	-0.502315	0.615446	NA
FvH4_1g22870	10.9278	6.58345	1.03963	6.33252	2.41184e-10	3.31258e-09
FvH4_1g22880	57.2248	-1.18905	0.507451	-2.34318	0.0191203	0.0472163
FvH4_1g22881	231.634	1.16161	0.438132	2.65129	0.00801851	0.0227077
FvH4_1g22890	2361.27	-1.03297	0.405318	-2.54853	0.0108177	0.0292347
FvH4_1g22900	4.71504	-3.01762	2.29882	-1.31268	0.189289	0.296929
FvH4_1g22910	235.024	-0.3861	0.378107	-1.02114	0.307187	0.429639
FvH4_1g22920	258.13	1.13091	0.28741	3.93485	8.325e-05	0.000426975
FvH4_1g22940	33.1409	1.30154	0.343461	3.7895	0.000150951	0.000724509
FvH4_1g22950	1.71896	5.55374	2.07437	2.67731	0.00742156	0.021281
FvH4_1g22971	44.0673	0.657523	0.366782	1.79268	0.0730238	0.14039
FvH4_1g22980	3.46188	1.15024	0.977295	1.17696	0.239211	0.355366
FvH4_1g22990	1.93278	-2.15874	2.46493	-0.875781	0.381149	0.507182
FvH4_1g23000	84.9804	1.38451	0.552624	2.50534	0.0122332	0.0323701
FvH4_1g23030	0.525108	-1.33271	4.52588	-0.294465	0.768403	NA
FvH4_1g23040	187.554	-0.499549	0.343818	-1.45295	0.146239	0.243243
FvH4_1g23050	675.755	0.551788	0.463807	1.18969	0.234168	0.349604
FvH4_1g23080	737.528	-1.51137	0.465577	-3.24623	0.00116942	0.00438429
FvH4_1g23082	392.18	-2.95702	0.468475	-6.31202	2.75423e-10	3.75259e-09
FvH4_1g23130	773.85	0.764695	0.475401	1.60852	0.10772	0.191286
FvH4_1g23140	1150.54	-0.198696	0.429221	-0.462922	0.64342	0.746207
FvH4_1g23150	635.327	-0.409467	0.238632	-1.71589	0.0861814	0.160291
FvH4_1g23160	61.867	1.34493	0.512822	2.62262	0.00872574	0.024346
FvH4_1g23210	58.8898	1.46886	0.338952	4.33353	1.46737e-05	9.02642e-05
FvH4_1g23213	966.882	-0.0755632	0.381622	-0.198005	0.843041	0.902579
FvH4_1g23230	8.67802	1.17169	0.590847	1.98306	0.0473602	0.0992731
FvH4_1g23232	123.253	13.3465	4.8924	2.728	0.00637195	0.0187165
FvH4_1g23240	667.192	-0.776636	0.273874	-2.83574	0.00457198	0.0141574
FvH4_1g23250	45.7161	2.49271	0.868644	2.86966	0.00410916	0.0129175
FvH4_1g23260	75.3868	-0.468752	0.436603	-1.07363	0.282986	0.40351
FvH4_1g23270	2.0946	1.74942	1.65883	1.05461	0.291605	0.412713
FvH4_1g23280	1257.36	-1.53371	0.748371	-2.0494	0.0404234	0.0871905
FvH4_1g23290	9.40355	9.63973	4.89546	1.96912	0.0489396	0.101941
FvH4_1g23291	8.26206	-0.507883	0.716745	-0.708597	0.478575	0.601674
FvH4_1g23300	5.38134	-0.223369	0.818708	-0.272831	0.784983	0.859037
FvH4_1g23310	1000.9	-2.07859	0.797713	-2.60569	0.00916907	0.0253827
FvH4_1g23320	87.5035	0.0981111	0.259939	0.377439	0.705848	0.796139
FvH4_1g23330	39.9858	-1.4022	0.772482	-1.81519	0.0694954	0.134812
FvH4_1g23340	97.5787	1.23154	0.402239	3.06173	0.00220065	0.00756046
FvH4_1g23350	11.768	3.46417	0.885104	3.91386	9.0834e-05	0.000461812
FvH4_1g23360	161.331	-0.601146	0.374241	-1.60631	0.108207	0.191958
FvH4_1g23370	3.1025	3.81988	1.37646	2.77514	0.00551776	0.0165805
FvH4_1g23380	5.42077	3.26304	1.0183	3.2044	0.00135346	0.00496979
FvH4_1g23390	37.0649	11.324	1.42154	7.96602	1.63861e-15	4.27403e-14
FvH4_1g23400	27.9827	9.21203	1.20957	7.61594	2.6177e-14	6.01276e-13
FvH4_1g23421	8.70141	7.37875	1.81256	4.07091	4.68307e-05	0.000257206
FvH4_1g23440	149.9	0.942258	0.522759	1.80247	0.0714713	0.137974
FvH4_1g23450	335.025	0.0850356	0.422177	0.201422	0.840369	0.900774
FvH4_1g23460	72.1401	0.316697	0.29385	1.07775	0.281144	0.401357
FvH4_1g23470	273.582	-0.238302	0.188201	-1.26621	0.205437	0.315977
FvH4_1g23480	8.85383	0.312909	0.738767	0.423556	0.67189	0.76885
FvH4_1g23490	13677.6	-1.84328	0.451468	-4.08285	4.4486e-05	0.000245311
FvH4_1g23500	4.6848	0.320201	1.02353	0.312841	0.754401	0.834563
FvH4_1g23510	173.988	-0.000636445	0.335598	-0.00189645	0.998487	1
FvH4_1g23520	5.47876	0.85183	0.812739	1.0481	0.294593	0.415923
FvH4_1g23521	18.3622	0.370161	0.496031	0.746246	0.455519	0.57953
FvH4_1g23532	1.1836	3.3322	3.05157	1.09196	0.27485	0.394885
FvH4_1g23540	4.96658	-2.05661	1.71581	-1.19863	0.230673	0.345632
FvH4_1g23541	3.92875	-2.13803	1.32326	-1.61573	0.106153	0.189162
FvH4_1g23542	36.0791	0.26655	0.365333	0.729609	0.465629	0.589487
FvH4_1g23550	64.9362	0.585206	0.468611	1.24881	0.211734	0.32344
FvH4_1g23560	2.68388	1.84954	1.0659	1.73519	0.0827071	0.155238
FvH4_1g23570	166.679	1.40653	0.611142	2.30148	0.0213644	0.0517901
FvH4_1g23580	2.98671	-0.0589876	1.79566	-0.0328501	0.973794	0.991989
FvH4_1g23590	303.346	-1.14169	0.431451	-2.64616	0.00814122	0.022984
FvH4_1g23600	132.284	1.39808	0.519467	2.69137	0.00711592	0.0205415
FvH4_1g23610	9.12177	3.35531	1.11536	3.00829	0.00262725	0.00881619
FvH4_1g23620	94.9035	0.973235	0.603171	1.61353	0.106629	0.189794
FvH4_1g23630	43.9609	-3.49169	0.957517	-3.64661	0.000265727	0.00119741
FvH4_1g23640	1.49263	2.6496	2.26314	1.17076	0.241694	0.358327
FvH4_1g23660	112.208	0.575644	0.433983	1.32642	0.1847	0.29104
FvH4_1g23670	791.787	0.233787	0.335816	0.696175	0.486319	0.609183
FvH4_1g23671	1.98844	0	4.27455	0	1	1
FvH4_1g23681	30.9051	1.45955	1.28908	1.13224	0.257532	0.376189
FvH4_1g23710	2174.52	6.64948	0.662948	10.0302	1.1232e-23	6.69527e-22
FvH4_1g23711	142.981	4.81722	0.650631	7.40391	1.32228e-13	2.81881e-12
FvH4_1g23740	12.317	3.4992	0.716701	4.88237	1.04817e-06	8.18246e-06
FvH4_1g23750	5.70363	5.77164	1.92397	2.99987	0.00270099	0.00902771
FvH4_1g23760	2.13839	-2.28784	2.01117	-1.13757	0.255301	0.373751
FvH4_1g23790	1115.34	0.429609	0.284276	1.51124	0.130727	0.222349
FvH4_1g23791	20.8312	0.203207	0.546231	0.372017	0.70988	0.799113
FvH4_1g23800	1.02018	-0.374055	2.90677	-0.128684	0.897608	0.94099
FvH4_1g23802	3.53806	0.395451	1.00029	0.395338	0.692593	0.785205
FvH4_1g23805	46.7051	-0.319337	0.404099	-0.790243	0.429386	0.554866
FvH4_1g23806	18.5011	2.02286	0.578917	3.49421	0.000475464	0.0020038
FvH4_1g23810	8.13264	4.54138	1.37372	3.30591	0.000946681	0.00365605
FvH4_1g23821	2.02353	7.42548	4.90744	1.51311	0.130253	0.221745
FvH4_1g23831	1.17057	-0.517962	2.08904	-0.247943	0.804179	0.873896
FvH4_1g23850	91.2143	-1.76889	0.495494	-3.56996	0.000357039	0.00155397
FvH4_1g23851	56.7894	-1.02194	0.756676	-1.35056	0.176835	0.281689
FvH4_1g23870	86.8034	-0.322249	0.347847	-0.926411	0.354232	0.480071
FvH4_1g23880	175.655	0.523524	0.454502	1.15186	0.249378	0.367483
FvH4_1g23890	752.503	-1.28603	0.509091	-2.52612	0.011533	0.0308277
FvH4_1g23900	5.05374	0.170554	0.888551	0.191946	0.847784	0.906066
FvH4_1g23910	410.52	0.363296	0.457011	0.794939	0.426649	0.552087
FvH4_1g23920	545.637	0.69402	0.315732	2.19813	0.0279396	0.0645343
FvH4_1g23940	7.34484	0.268968	0.841413	0.319663	0.749224	0.830235
FvH4_1g23941	5.52675	1.66127	0.962044	1.72681	0.084202	0.157411
FvH4_1g23950	285.725	-0.0977829	0.457614	-0.21368	0.830797	0.893831
FvH4_1g23960	2.67683	2.33081	1.54155	1.512	0.130535	0.22209
FvH4_1g23970	569.725	-1.22752	0.440211	-2.78847	0.00529577	0.0160475
FvH4_1g23971	11.232	1.37741	0.88689	1.55308	0.120405	0.208708
FvH4_1g23980	67.1876	-1.9356	0.745253	-2.59723	0.00939778	0.0259308
FvH4_1g23990	2.58763	1.68613	1.44176	1.1695	0.242203	0.358912
FvH4_1g24000	25.8491	2.26314	0.631475	3.5839	0.000338501	0.00148507
FvH4_1g24010	36.5335	0.80253	0.405391	1.97964	0.0477435	0.0999906
FvH4_1g24020	11.0055	2.18538	0.858542	2.54545	0.0109137	0.029425
FvH4_1g24030	268.973	0.883395	0.430053	2.05416	0.0399607	0.0863793
FvH4_1g24040	22.8427	2.82727	0.994371	2.84328	0.0044652	0.0138541
FvH4_1g24041	33.6448	-0.799369	0.442074	-1.80822	0.0705716	0.136549
FvH4_1g24050	15.4694	1.91307	0.579896	3.29898	0.000970365	0.00373634
FvH4_1g24060	32.1536	1.23704	0.550128	2.24865	0.0245349	0.0579666
FvH4_1g24090	382.467	1.80878	0.786121	2.3009	0.0213975	0.0518646
FvH4_1g24100	334.615	1.0865	0.295043	3.68251	0.000230951	0.00105787
[truncated: 20,440 more rows]

## Sheet: Fvesca_Ripe-vs-Immature_genes
Gene_ID	baseMean	log2FoldChange	lfcSE	stat	pvalue	padj
FvH4_1g00010	549.798	0.447426	0.451653	0.990641	0.321861	0.453316
FvH4_1g00020	122.744	-1.45286	0.235689	-6.16429	7.07989e-10	7.61505e-09
FvH4_1g00030	132.77	-1.13787	0.456958	-2.4901	0.0127708	0.0317376
FvH4_1g00040	2265.69	-1.46896	0.23195	-6.33307	2.4033e-10	2.74445e-09
FvH4_1g00050	108.14	-1.05576	0.242379	-4.35581	1.32577e-05	7.02103e-05
FvH4_1g00060	35.2435	-1.74077	0.683468	-2.54696	0.0108665	0.02764
FvH4_1g00070	2803.44	-0.130566	0.192124	-0.679593	0.496762	0.628398
FvH4_1g00080	503.444	0.485983	0.209614	2.31847	0.0204239	0.0476698
FvH4_1g00090	2258.86	-0.7489	0.319333	-2.3452	0.0190167	0.0449118
FvH4_1g00100	234.759	-1.39656	0.270254	-5.16757	2.37155e-07	1.71167e-06
FvH4_1g00110	613.864	-0.554278	0.377161	-1.46961	0.141669	0.238005
FvH4_1g00120	55.8633	-0.0735548	0.400657	-0.183585	0.854339	0.918908
FvH4_1g00130	67.8688	-0.199122	0.27485	-0.724477	0.468773	0.602597
FvH4_1g00150	7.32426	-0.288868	1.87067	-0.15442	0.877279	0.934336
FvH4_1g00160	242.566	-0.203122	0.222904	-0.911252	0.362162	0.495473
FvH4_1g00191	670.412	0.221312	0.189833	1.16583	0.243684	0.366216
FvH4_1g00200	830.467	0.0267263	0.597114	0.0447591	0.964299	0.991365
FvH4_1g00201	239.185	-0.15107	0.493958	-0.305837	0.759729	0.850597
FvH4_1g00210	890.91	-0.174488	0.519073	-0.336153	0.736756	0.83321
FvH4_1g00220	3.54795	-0.750956	0.971128	-0.773283	0.439355	0.57426
FvH4_1g00230	121.741	0.174563	0.398006	0.438595	0.660955	0.771299
FvH4_1g00240	226.063	-2.81407	0.411753	-6.83437	8.23683e-12	1.12946e-10
FvH4_1g00250	607.009	0.579881	0.208885	2.77608	0.00550183	0.0153331
FvH4_1g00300	2.39797	0	4.56215	0	1	1
FvH4_1g00330	735.202	3.63071	0.56431	6.4339	1.24374e-10	1.47094e-09
FvH4_1g00340	65.4051	9.49613	1.24697	7.61538	2.62912e-14	4.76232e-13
FvH4_1g00341	7.88123	-1.75112	0.984629	-1.77846	0.0753289	0.141429
FvH4_1g00342	349.221	0.639813	0.784358	0.815716	0.414663	0.549399
FvH4_1g00343	212.78	-3.16924	0.745929	-4.24871	2.15002e-05	0.000108745
FvH4_1g00344	107.694	0.550577	0.717201	0.767674	0.442681	0.577589
FvH4_1g00345	1803.67	3.78553	0.362396	10.4458	1.53102e-25	7.43081e-24
FvH4_1g00346	354.901	-2.43521	0.439604	-5.53954	3.03268e-08	2.53768e-07
FvH4_1g00350	493.759	0.94526	0.34515	2.73869	0.00616842	0.0169173
FvH4_1g00360	202.333	-1.55455	0.422407	-3.68022	0.000233037	0.000940061
FvH4_1g00370	1794.59	-0.354075	0.282603	-1.25291	0.21024	0.326004
FvH4_1g00380	725.325	1.74364	0.182402	9.5593	1.18551e-21	4.09802e-20
FvH4_1g00390	543.494	0.74276	0.693961	1.07032	0.284475	0.412843
FvH4_1g00400	400.754	-9.33164	1.07487	-8.68163	3.90122e-18	9.82202e-17
FvH4_1g00410	582.175	-1.18619	0.33021	-3.59223	0.00032786	0.00127129
FvH4_1g00420	395.841	2.69233	0.484731	5.55428	2.78764e-08	2.34771e-07
FvH4_1g00421	3.57254	-0.404861	2.01424	-0.201	0.840699	0.909757
FvH4_1g00430	282.206	0.700954	0.364276	1.92424	0.0543243	0.108412
FvH4_1g00440	899.521	-0.650431	0.637568	-1.02018	0.307645	0.437884
FvH4_1g00450	91.8169	-1.45924	0.398654	-3.66042	0.000251804	0.00100459
FvH4_1g00460	125.754	-0.294618	0.743734	-0.396134	0.692006	0.796852
FvH4_1g00470	182.134	0.301621	0.279398	1.07954	0.280347	0.408621
FvH4_1g00480	342.128	-0.231831	0.1906	-1.21632	0.223863	0.342613
FvH4_1g00490	89.0983	0.938211	0.292531	3.20722	0.00134023	0.00443738
FvH4_1g00500	204.636	-1.84367	0.651347	-2.83055	0.00464683	0.0132473
FvH4_1g00510	1423.64	-0.0306221	0.20951	-0.146161	0.883794	0.9383
FvH4_1g00530	560.592	0.885004	0.304659	2.9049	0.00367373	0.0108397
FvH4_1g00540	377.094	-3.81907	0.420107	-9.09071	9.83941e-20	2.85118e-18
FvH4_1g00550	414.505	0.559012	0.370362	1.50937	0.131205	0.223591
FvH4_1g00560	164.152	-0.017954	0.378653	-0.0474153	0.962182	0.989756
FvH4_1g00580	65.9533	-0.325166	0.222689	-1.46018	0.14424	0.241385
FvH4_1g00590	203.898	0.0147338	0.241813	0.0609306	0.951415	0.982052
FvH4_1g00620	5.81656	-1.6572	1.0634	-1.55839	0.11914	0.206716
FvH4_1g00630	161.836	-0.414192	0.261541	-1.58366	0.113272	0.198133
FvH4_1g00640	524.617	-0.386097	0.363956	-1.06083	0.288766	0.417592
FvH4_1g00650	80.2675	0.555431	0.229551	2.41964	0.0155357	0.0376842
FvH4_1g00660	145.124	-1.74943	0.2641	-6.62411	3.49349e-11	4.3798e-10
FvH4_1g00670	24.028	-2.61825	0.572278	-4.57513	4.75933e-06	2.73977e-05
FvH4_1g00680	20.4509	0.976435	0.397611	2.45576	0.0140588	0.0345264
FvH4_1g00690	339.389	-0.712587	0.336174	-2.1197	0.0340317	0.0731189
FvH4_1g00700	3.047	0.249276	1.22802	0.20299	0.839143	0.908617
FvH4_1g00710	868.702	3.91294	0.844004	4.63616	3.54941e-06	2.09199e-05
FvH4_1g00720	1009.19	0.561018	0.11884	4.72078	2.34942e-06	1.4294e-05
FvH4_1g00730	88.3128	-1.46396	0.326606	-4.48234	7.38277e-06	4.1081e-05
FvH4_1g00750	12.9192	-3.45771	0.596841	-5.79335	6.89961e-09	6.39985e-08
FvH4_1g00760	192.125	0.404419	0.234653	1.72348	0.0848019	0.15624
FvH4_1g00770	330.004	-1.98885	0.345249	-5.76062	8.38065e-09	7.69724e-08
FvH4_1g00780	79.051	-0.777323	0.361658	-2.14933	0.0316082	0.0687502
FvH4_1g00800	63.0971	0.0263792	0.326838	0.0807103	0.935672	0.970894
FvH4_1g00810	393.761	-0.509929	0.373516	-1.36521	0.172186	0.277399
FvH4_1g00811	0.733697	2.35884	2.41256	0.977731	0.328207	NA
FvH4_1g00820	2.31504	-0.404859	3.74398	-0.108136	0.913888	0.956972
FvH4_1g00830	1473.84	0.514723	0.117868	4.36693	1.26007e-05	6.71609e-05
FvH4_1g00860	34.2219	-3.57431	0.387034	-9.23515	2.57914e-20	7.92201e-19
FvH4_1g00870	586.115	0.949927	0.290116	3.27429	0.00105926	0.00360082
FvH4_1g00880	230.991	0.533259	0.444775	1.19894	0.230551	0.350695
FvH4_1g00890	182.347	0.382765	0.238539	1.60462	0.108577	0.191416
FvH4_1g00910	5.00533	0.507207	0.784381	0.646634	0.517869	0.648384
FvH4_1g00920	314.537	-1.32359	0.511698	-2.58666	0.00969107	0.0250141
FvH4_1g00930	3021.16	0.249414	0.303725	0.821184	0.411541	0.546477
FvH4_1g00940	236.086	0.832963	0.300975	2.76754	0.00564803	0.015676
FvH4_1g00950	206.747	0.505884	0.184548	2.74121	0.00612141	0.0168136
FvH4_1g00960	185.512	0.772625	0.433902	1.78064	0.0749709	0.14088
FvH4_1g00970	177.741	0.135154	0.409492	0.330054	0.741359	0.837359
FvH4_1g00971	207.715	-1.53923	0.260138	-5.91697	3.27921e-09	3.19902e-08
FvH4_1g00990	6472.35	-0.734985	0.1241	-5.9225	3.17074e-09	3.10023e-08
FvH4_1g01000	81.6138	-1.8813	0.385063	-4.88568	1.03072e-06	6.64117e-06
FvH4_1g01010	539.931	0.313317	0.1951	1.60593	0.108289	0.190971
FvH4_1g01020	83.0643	-0.634947	0.54088	-1.17391	0.240429	0.362516
FvH4_1g01030	551.596	-1.41997	0.327191	-4.33989	1.42553e-05	7.50385e-05
FvH4_1g01040	30.298	0.21358	0.679306	0.314409	0.753211	0.846122
FvH4_1g01050	399.213	-1.79962	0.511564	-3.51787	0.000435027	0.00164183
FvH4_1g01060	100.338	0.415679	0.41138	1.01045	0.312279	0.443072
FvH4_1g01070	2269.16	0.689719	0.796974	0.865423	0.386807	0.521262
FvH4_1g01090	173.545	0.484896	0.33828	1.43341	0.151739	0.251236
FvH4_1g01100	105.78	0.207447	0.263929	0.785995	0.431871	0.567028
FvH4_1g01110	217.067	-2.4218	0.858087	-2.82233	NA	NA
FvH4_1g01120	78.0441	-1.39473	0.396941	-3.51369	0.000441934	0.00166468
FvH4_1g01130	844.01	-3.69393	0.562069	-6.57202	4.96357e-11	6.13343e-10
FvH4_1g01140	450.796	-0.610916	0.599139	-1.01966	0.307891	0.438115
FvH4_1g01150	199.871	0.709028	0.277978	2.55066	0.0107519	0.0273841
FvH4_1g01160	330.852	0.496173	0.388669	1.2766	0.201745	0.315241
FvH4_1g01170	480.172	-0.530925	0.372342	-1.42591	0.153896	0.253926
FvH4_1g01180	823.129	1.59203	0.420828	3.78308	0.000154898	0.000651627
FvH4_1g01190	17.346	0.543382	1.28842	0.421745	0.673211	0.781466
FvH4_1g01200	18.9289	-0.712403	0.435833	-1.63458	0.102138	0.181989
FvH4_1g01202	61.5579	1.16916	0.589065	1.98477	0.0471701	0.0962701
FvH4_1g01210	2.82986	0.677135	1.2346	0.548465	0.583373	0.708843
FvH4_1g01220	2.66817	-0.637142	1.33614	-0.476853	0.633466	0.750174
FvH4_1g01230	14.8025	-0.490335	0.802061	-0.611344	0.540972	0.669936
FvH4_1g01240	4.44949	-3.10762	1.92328	-1.61579	0.106139	0.1878
FvH4_1g01250	1396.31	-0.00406899	0.160244	-0.0253925	0.979742	1
FvH4_1g01260	1107.69	-0.364727	0.335809	-1.08611	0.277429	0.405589
FvH4_1g01270	73.5255	-0.663143	0.237102	-2.79687	0.00516002	0.0145008
FvH4_1g01280	555.05	-1.27402	0.376038	-3.38801	0.000704019	0.00252411
FvH4_1g01290	64.4852	-0.243769	0.341486	-0.713848	0.475321	0.608304
FvH4_1g01300	43.697	-0.789669	0.292104	-2.70338	0.00686386	0.0186009
FvH4_1g01310	45.4104	-1.8765	0.426148	-4.40339	1.06571e-05	5.76793e-05
FvH4_1g01320	77.8414	0.169992	0.269913	0.629802	0.528824	0.65903
FvH4_1g01321	4.11252	0	3.26239	0	1	1
FvH4_1g01322	1.07623	0	4.56215	0	1	NA
FvH4_1g01350	12.6468	-0.606332	0.44517	-1.36203	0.17319	0.27885
FvH4_1g01360	33.0015	-0.641673	0.779221	-0.823481	0.410235	0.545078
FvH4_1g01363	19.0309	-0.167804	0.426532	-0.393414	0.694014	0.798266
FvH4_1g01365	8.75824	-0.402413	0.519396	-0.774772	0.438475	0.573423
FvH4_1g01380	19.9432	-0.523476	1.02275	-0.511831	0.608769	0.730462
FvH4_1g01381	13.9623	-0.42324	0.520723	-0.812794	0.416336	0.551074
FvH4_1g01382	9.38026	2.99875	1.79322	1.67228	0.0944699	0.170861
FvH4_1g01383	9.37055	-1.34746	0.737686	-1.82661	0.0677591	0.129836
FvH4_1g01390	32.3619	-1.0974	0.373074	-2.94152	0.0032661	0.00974392
FvH4_1g01420	12.7185	-1.01777	0.677368	-1.50254	0.132959	0.226059
FvH4_1g01430	109.295	0.372831	0.272593	1.36772	0.1714	0.276485
FvH4_1g01440	1232.39	-0.525166	0.436975	-1.20182	0.229432	0.349389
FvH4_1g01450	85.1501	-0.322986	0.418583	-0.771616	0.440342	0.575235
FvH4_1g01460	10.0983	1.07637	0.661566	1.627	0.103738	0.184427
FvH4_1g01480	111.496	0.527847	0.321903	1.63977	0.101053	0.18048
FvH4_1g01490	227.011	1.41742	0.627713	2.25806	0.0239416	0.0544384
FvH4_1g01491	33.2469	-2.17212	0.484482	-4.4834	7.3464e-06	4.08998e-05
FvH4_1g01500	3.59321	0.148125	1.04858	0.141263	0.887662	0.940471
FvH4_1g01520	36.2864	-3.94928	0.757841	-5.21122	1.87599e-07	1.37523e-06
FvH4_1g01530	208.488	4.12682	0.329363	12.5297	5.13627e-36	4.58236e-34
FvH4_1g01540	265.268	-0.423356	0.670918	-0.631011	0.528033	0.658197
FvH4_1g01550	1331.67	-1.32603	0.532902	-2.48831	0.0128352	0.0318708
FvH4_1g01560	83.3873	-0.0531542	0.683298	-0.0777906	0.937995	0.97274
FvH4_1g01570	1096.67	-0.968837	0.510063	-1.89945	0.0575059	0.113611
FvH4_1g01590	622.68	1.02776	0.193326	5.31619	1.05961e-07	8.09328e-07
FvH4_1g01600	2.04002	1.51872	3.48777	0.435442	0.663242	0.773212
FvH4_1g01610	813.821	9.49646	0.392939	24.1678	4.85782e-129	7.46058e-126
FvH4_1g01620	26.7291	9.67904	1.47036	6.58275	4.61833e-11	5.71998e-10
FvH4_1g01660	170.915	-0.765334	0.242275	-3.15894	0.00158343	0.00514903
FvH4_1g01700	3.5076	0.0784662	1.22231	0.064195	0.948815	0.980306
FvH4_1g01701	250.609	0.257685	0.385599	0.668273	0.503959	0.635521
FvH4_1g01710	92.0738	0.301598	0.256905	1.17397	0.240407	0.362516
FvH4_1g01720	464.155	-0.92027	0.382991	-2.40285	0.0162679	0.0392303
FvH4_1g01730	239.511	1.73877	0.472188	3.68236	0.000231082	0.000932526
FvH4_1g01750	910.204	0.0353652	0.497844	0.0710367	0.943369	0.976429
FvH4_1g01760	13.1996	1.77262	0.58977	3.00561	0.00265047	0.00810983
FvH4_1g01770	393.57	1.22156	0.506908	2.40982	0.0159605	0.0386144
FvH4_1g01771	8097.33	-1.94561	0.670535	-2.90158	0.00371282	0.0109295
FvH4_1g01772	2192.62	-8.08475	0.554203	-14.5881	3.3453e-48	5.32794e-46
FvH4_1g01790	231.4	-0.409196	0.361572	-1.13171	0.257754	0.382707
FvH4_1g01800	158.18	1.05215	0.507171	2.07455	0.0380287	0.0802095
FvH4_1g01810	309.826	-0.730309	0.344693	-2.11872	0.0341138	0.0732602
FvH4_1g01820	532.253	0.723014	0.141225	5.11958	3.06212e-07	2.1686e-06
FvH4_1g01830	7.67376	2.29086	0.867145	2.64184	0.00824565	0.0217694
FvH4_1g01840	28.1989	-5.3347	1.44132	-3.70126	0.000214531	0.000871622
FvH4_1g01870	152.134	3.77496	0.307515	12.2757	1.22289e-34	1.00211e-32
FvH4_1g01880	1383.84	2.05181	0.673038	3.04858	0.00229928	0.00715541
FvH4_1g01890	187.732	7.87643	1.10583	7.12262	1.05895e-12	1.60681e-11
FvH4_1g01891	356.708	1.50346	0.139503	10.7772	4.4091e-27	2.34654e-25
FvH4_1g01900	6.73876	0.768406	1.11817	0.6872	0.491957	0.623824
FvH4_1g01910	12.8822	1.95443	0.852987	2.29128	0.0219471	0.0506422
FvH4_1g01920	4.56929	4.29656	1.86383	2.30523	0.0211537	0.049112
FvH4_1g01930	610.15	-2.6323	0.695743	-3.78344	0.000154673	0.000650809
FvH4_1g01960	325.899	-0.161632	0.515095	-0.31379	0.753681	0.846473
FvH4_1g01970	86.4491	-0.866322	0.561297	-1.54343	0.122726	0.211777
FvH4_1g01971	42.1018	-0.730356	0.339434	-2.15169	0.0314218	0.0683875
FvH4_1g01990	500.303	0.809647	0.132311	6.11928	9.39971e-10	9.94113e-09
FvH4_1g02000	395.672	0.540468	0.384531	1.40552	0.159866	0.261748
FvH4_1g02010	152.003	2.87632	0.256899	11.1963	4.24912e-29	2.53778e-27
FvH4_1g02011	1.05511	5.57172	3.32234	1.67705	0.0935332	NA
FvH4_1g02012	0.943526	4.86492	3.56109	1.36613	0.171897	NA
FvH4_1g02020	563.026	0.435717	0.541344	0.80488	0.420889	0.555527
FvH4_1g02030	512.914	0.586336	0.160574	3.65151	0.000260702	0.00103669
FvH4_1g02070	41.4304	-2.77525	0.350004	-7.92918	2.20593e-15	4.41206e-14
FvH4_1g02080	452.402	-1.06214	0.395631	-2.68468	0.0072599	0.0195172
FvH4_1g02100	12.9401	-2.5965	0.622601	-4.1704	3.04061e-05	0.000149363
FvH4_1g02110	130.319	0.441233	0.170626	2.58596	0.00971072	0.0250588
FvH4_1g02111	7.94383	1.99396	0.804377	2.47888	0.0131794	0.0326088
FvH4_1g02112	266.565	3.07889	0.717829	4.28917	1.79342e-05	9.23822e-05
FvH4_1g02120	20227.1	9.48114	0.844156	11.2315	2.85572e-29	1.7296e-27
FvH4_1g02121	474.235	0.455081	0.344604	1.32059	0.186637	0.296001
FvH4_1g02150	688.495	-0.346026	0.360756	-0.959169	0.337474	0.469554
FvH4_1g02151	71.3339	-8.52572	1.21268	-7.03045	2.05864e-12	3.02755e-11
FvH4_1g02152	42.6156	-2.76337	0.531836	-5.19591	2.03721e-07	1.48481e-06
FvH4_1g02160	87.4797	-0.404862	1.72109	-0.235235	0.814026	0.891796
FvH4_1g02170	240.834	0.456014	0.48457	0.941068	0.34667	0.478848
FvH4_1g02190	2222.57	-0.275619	0.485808	-0.567341	0.570483	0.697206
FvH4_1g02200	59.394	-0.193886	0.528876	-0.3666	0.713917	0.814839
FvH4_1g02210	69.3941	0.534821	0.271724	1.96825	0.0490395	0.0994153
FvH4_1g02220	39.6295	-0.372155	0.358518	-1.03804	0.299252	0.428805
FvH4_1g02230	254.213	0.0297171	0.299102	0.0993543	0.920857	0.961404
FvH4_1g02250	0.879974	-4.12789	2.92875	-1.40944	0.158706	NA
FvH4_1g02270	123.032	0.506091	0.273545	1.85012	0.0642959	0.124565
FvH4_1g02310	89.454	-2.87277	0.545266	-5.26858	1.37485e-07	1.03107e-06
FvH4_1g02340	553.398	-0.264811	0.142119	-1.86331	0.0624194	0.12162
FvH4_1g02350	0.697323	0.147309	2.31602	0.0636042	0.949285	NA
FvH4_1g02370	5.24255	1.34544	0.715872	1.87945	0.0601835	0.118056
FvH4_1g02380	20.4974	-1.45126	0.433202	-3.35008	0.000807876	0.00284337
FvH4_1g02382	1.2104	4.61131	3.54407	1.30113	0.193213	NA
FvH4_1g02420	214.153	0.249339	0.363526	0.68589	0.492782	0.624429
FvH4_1g02430	153.759	0.206469	0.492292	0.419404	0.674921	0.782628
FvH4_1g02440	1211.9	-0.625589	0.220964	-2.83118	0.00463773	0.0132284
FvH4_1g02450	699.135	1.17298	0.229038	5.12133	3.03386e-07	2.15071e-06
FvH4_1g02451	2.03286	2.81772	1.4762	1.90877	0.0562917	0.111614
FvH4_1g02460	413.12	0.126811	0.357466	0.35475	0.722777	0.822158
FvH4_1g02470	390.584	0.507839	0.21038	2.41392	0.0157819	0.0382255
FvH4_1g02480	2.99584	0.805563	1.17701	0.684418	0.493711	0.625385
FvH4_1g02481	14.3895	2.75972	1.47659	1.86898	0.0616256	0.120379
FvH4_1g02490	2306.16	1.48036	0.257687	5.74481	9.2023e-09	8.39452e-08
FvH4_1g02500	458.521	1.54956	0.409412	3.78484	0.000153807	0.000647544
FvH4_1g02520	1.28581	-0.316493	2.47696	-0.127775	0.898327	NA
FvH4_1g02530	177.94	0.867526	0.210084	4.12942	3.63683e-05	0.000175444
FvH4_1g02540	692.293	0.190061	0.234536	0.810369	0.417728	0.552406
FvH4_1g02550	148.906	0.403839	0.271936	1.48505	0.137531	0.232491
FvH4_1g02560	6.42033	-2.80565	1.7553	-1.59839	0.109957	0.193373
FvH4_1g02570	4015.91	-5.52334	1.42541	-3.87491	NA	NA
FvH4_1g02580	305.504	1.16681	0.365949	3.18844	0.0014304	0.0046983
FvH4_1g02590	77.6489	0.871288	0.276064	3.15611	0.00159887	0.00519294
FvH4_1g02620	669.565	3.80569	0.58281	6.52989	6.58189e-11	8.03618e-10
FvH4_1g02621	389.697	1.02473	0.3543	2.89228	0.00382454	0.0112062
FvH4_1g02623	30.8143	2.96985	0.429331	6.9174	4.59992e-12	6.52394e-11
FvH4_1g02630	2.48807	-1.66211	1.69418	-0.981071	0.326558	0.458042
FvH4_1g02650	74.7227	0.740894	0.447868	1.65427	0.0980731	0.176133
FvH4_1g02660	668.02	0.206752	0.341504	0.605417	0.544902	0.673558
FvH4_1g02670	78.9431	-0.697915	0.598182	-1.16673	0.243321	0.365797
FvH4_1g02680	834.842	0.294637	0.213853	1.37775	0.16828	0.272474
FvH4_1g02690	5.05919	1.04734	1.91176	0.547841	0.583801	0.70913
FvH4_1g02700	19.1551	-1.66508	1.00477	-1.65717	0.0974841	0.175381
FvH4_1g02710	89.7595	0.439135	0.362822	1.21033	0.226151	0.34542
FvH4_1g02720	517.284	11.2316	0.956173	11.7465	7.36449e-32	5.20868e-30
FvH4_1g02730	2983.28	3.98673	0.282636	14.1055	3.51121e-45	4.90224e-43
FvH4_1g02740	0.530369	-2.30307	3.40568	-0.676243	0.498887	NA
FvH4_1g02750	1.03689	-3.0784	2.32796	-1.32236	0.186049	NA
FvH4_1g02760	288.126	0.70741	0.551375	1.28299	0.199494	0.312542
FvH4_1g02770	20.2661	0.518253	0.473503	1.09451	0.273732	0.401139
FvH4_1g02780	116.587	0.898521	0.293684	3.05948	0.00221723	0.00691911
FvH4_1g02800	37.7138	-0.359982	0.351974	-1.02275	0.306426	0.436507
FvH4_1g02820	319.467	0.549949	0.529637	1.03835	0.299107	0.42871
FvH4_1g02840	13.1096	-4.46325	1.98305	-2.2507	0.0244043	0.0552916
FvH4_1g02850	72.9076	-0.047418	0.401923	-0.117978	0.906085	0.952161
FvH4_1g02860	0.990992	1.34969	2.58431	0.522264	0.601486	NA
FvH4_1g02870	0.702751	1.29792	1.88078	0.690096	0.490134	NA
FvH4_1g02880	16.8517	2.81997	0.844415	3.33955	0.000839146	0.00294043
FvH4_1g02890	121.124	1.22975	0.665046	1.84912	0.064441	0.12479
FvH4_1g02900	7.1665	-0.924067	1.95114	-0.473603	0.635783	0.751883
FvH4_1g02950	32.9479	-6.31015	1.30552	-4.83342	1.34204e-06	8.47936e-06
FvH4_1g02980	1.73358	-0.731889	1.51422	-0.483345	0.628851	0.746188
FvH4_1g02990	255.346	0.171337	0.229328	0.747128	0.454986	0.589281
FvH4_1g03000	3.52095	-0.103471	0.985406	-0.105004	0.916373	0.958547
FvH4_1g03001	3.21021	-0.132086	1.79292	-0.0736707	0.941272	0.975011
FvH4_1g03010	207.175	-6.40861	0.787111	-8.14193	3.89011e-16	8.24865e-15
FvH4_1g03020	553.192	-0.0413094	0.41571	-0.0993709	0.920844	0.961404
FvH4_1g03040	142.165	-1.89221	1.27741	-1.48129	0.138529	0.233664
FvH4_1g03050	292.951	0.990744	0.287023	3.45179	0.000556888	0.00204718
FvH4_1g03060	14.2419	-3.46415	0.543085	-6.37865	1.78656e-10	2.07301e-09
FvH4_1g03080	70.5137	-1.01298	0.627796	-1.61355	0.106625	0.18847
FvH4_1g03090	731.498	1.14835	0.437777	2.62315	0.00871217	0.0228272
FvH4_1g03100	43.9255	-4.45201	0.449727	-9.89936	4.18957e-23	1.6e-21
FvH4_1g03120	2.6417	0.694355	1.46167	0.475042	0.634757	0.751008
FvH4_1g03130	271.777	0.312755	0.210981	1.48239	0.138237	0.23344
FvH4_1g03140	184.742	-0.427514	0.256506	-1.66668	0.0955772	0.172516
FvH4_1g03150	260.93	0.97108	0.246758	3.93535	8.30758e-05	0.00037205
FvH4_1g03160	368.137	2.91826	0.618625	4.71734	2.38952e-06	1.45256e-05
FvH4_1g03170	144.67	4.95837	0.49418	10.0335	1.08565e-23	4.37946e-22
FvH4_1g03180	285.636	-0.0102665	0.232902	-0.0440809	0.96484	0.991778
FvH4_1g03190	12.5751	0	4.56215	0	1	1
FvH4_1g03200	29.9252	-2.60928	0.682796	-3.82146	0.000132661	0.000568311
FvH4_1g03202	15.162	-3.6259	1.00555	-3.60587	0.000311105	0.00121245
FvH4_1g03240	727.476	2.2401	0.326672	6.85733	7.01606e-12	9.73868e-11
FvH4_1g03260	1267.32	0.433073	0.430384	1.00625	0.314297	0.445405
FvH4_1g03270	160.286	-0.259928	0.508871	-0.510794	0.609495	0.730895
FvH4_1g03280	593.757	3.66739	0.365626	10.0304	1.12011e-23	4.51003e-22
FvH4_1g03290	174.952	11.0041	1.04967	10.4834	1.02959e-25	5.03233e-24
FvH4_1g03300	1089.84	8.14504	0.621427	13.107	3.00249e-39	3.26043e-37
FvH4_1g03310	680.294	8.01642	0.504458	15.8911	7.29772e-57	1.76301e-54
FvH4_1g03311	2.69589	6.9787	2.56762	2.71796	0.00656851	0.017893
FvH4_1g03320	408.993	1.00729	0.28741	3.50473	0.000457074	0.0017148
FvH4_1g03330	4.23163	-1.45249	0.987162	-1.47138	0.141188	0.237367
FvH4_1g03331	19.0101	-0.884113	0.461922	-1.91399	0.0556217	0.11056
FvH4_1g03340	468.224	-2.38137	0.255924	-9.30499	1.33999e-20	4.1828e-19
FvH4_1g03350	46.8358	0.314625	0.315508	0.997202	0.318667	0.450101
FvH4_1g03360	944.194	0.166197	0.776845	0.213939	0.830595	0.902908
FvH4_1g03370	33.1858	-6.14379	1.62764	-3.77467	0.000160223	0.000671791
FvH4_1g03371	393.235	0.903828	0.46703	1.93527	0.0529575	0.106048
FvH4_1g03372	308.311	-0.117602	0.151828	-0.774573	0.438592	0.573506
FvH4_1g03410	471.117	-0.130213	0.203483	-0.63992	0.522225	0.65266
FvH4_1g03420	41.9257	-1.35121	2.7228	-0.496259	0.619711	0.738809
FvH4_1g03430	10.4422	-0.0922979	0.709781	-0.130037	0.896537	0.945816
FvH4_1g03440	9.72622	-0.548407	0.552076	-0.993355	0.320537	0.451866
FvH4_1g03450	2.43308	-0.330963	1.00847	-0.328183	0.742773	0.83834
FvH4_1g03460	1164.01	-0.419291	0.343977	-1.21895	0.222863	0.341465
FvH4_1g03470	384.482	-0.342962	0.3057	-1.12189	0.261909	0.387458
FvH4_1g03480	0.644475	-3.77353	3.10341	-1.21593	0.224011	NA
FvH4_1g03481	5.07309	4.58728	1.57982	2.90367	0.00368813	0.0108717
FvH4_1g03490	907.022	0.0596826	0.31523	0.18933	0.849834	0.91595
FvH4_1g03500	1132.15	-0.0708508	0.500087	-0.141677	0.887335	0.940313
FvH4_1g03510	18.1698	-5.39138	1.42564	-3.78174	0.000155736	0.000654896
FvH4_1g03520	80.5325	-1.83734	0.26504	-6.93232	4.13981e-12	5.89861e-11
FvH4_1g03540	177.504	2.56428	0.516398	4.96572	6.84475e-07	4.56891e-06
FvH4_1g03541	39.5565	-1.61942	0.489817	-3.30618	0.000945785	0.00326462
FvH4_1g03542	1.64356	2.57267	3.36726	0.764025	0.444853	0.579578
FvH4_1g03550	96.2487	1.07441	0.192661	5.57671	2.45112e-08	2.08142e-07
FvH4_1g03560	11.8325	-2.49093	1.16456	-2.13894	0.0324408	0.0702529
FvH4_1g03570	518.475	-0.116894	0.319874	-0.365438	0.714784	0.815459
FvH4_1g03571	6.57432	0.953738	0.801851	1.18942	0.234274	0.355077
FvH4_1g03572	4.80523	0.0846338	0.657028	0.128813	0.897506	0.946362
FvH4_1g03580	919.499	0.0815637	0.107433	0.759202	0.447732	0.582306
FvH4_1g03590	114.308	-2.9573	0.444142	-6.65845	2.76737e-11	3.5187e-10
FvH4_1g03600	959.234	-0.221283	0.33451	-0.661515	0.508282	0.639397
FvH4_1g03610	134.494	0.772502	0.176438	4.37832	1.19598e-05	6.39828e-05
FvH4_1g03630	340.215	3.05596	0.950944	3.21361	0.0013108	0.00434662
FvH4_1g03650	48.9303	1.17437	0.84874	1.38366	0.166461	0.270112
FvH4_1g03680	210.399	-3.12456	0.484939	-6.4432	1.16979e-10	1.38844e-09
FvH4_1g03690	45.0472	-0.00625132	0.352221	-0.0177483	0.98584	1
FvH4_1g03720	236.556	1.36054	0.425698	3.19602	0.00139336	0.00459276
FvH4_1g03730	350.376	1.03776	0.299117	3.46942	0.000521583	0.00193351
FvH4_1g03750	2.14857	-1.56911	1.35649	-1.15674	0.247379	0.37049
FvH4_1g03760	1.46548	-3.80802	2.07789	-1.83264	0.0668565	0.128492
FvH4_1g03770	32.3986	5.36646	1.2424	4.31945	1.56418e-05	8.18085e-05
FvH4_1g03790	48.8581	-2.16803	0.590882	-3.66914	0.000243368	0.000976789
FvH4_1g03800	5.15625	-2.29968	1.58862	-1.4476	0.147729	0.246049
FvH4_1g03810	1.22758	0	4.56215	0	1	NA
FvH4_1g03830	1503.4	-0.181547	0.283207	-0.641039	0.521497	0.652016
FvH4_1g03840	313.597	-0.781837	0.271588	-2.87876	0.00399246	0.0116254
FvH4_1g03850	534.467	-0.159185	0.371293	-0.42873	0.668119	0.777045
FvH4_1g03860	1.86823	-0.456226	1.66993	-0.2732	0.7847	0.869592
FvH4_1g03880	422.779	-0.251175	0.609793	-0.411902	0.680411	0.787168
FvH4_1g03900	84.811	1.43251	0.479491	2.98757	0.00281201	0.00854936
FvH4_1g03910	27.5947	1.30782	1.06496	1.22805	0.219428	0.337214
FvH4_1g03920	4717.67	0.867647	0.395684	2.19278	0.0283234	0.0627428
FvH4_1g03930	130.05	-0.89827	0.287769	-3.1215	0.00179934	0.00576652
FvH4_1g03950	259.256	0.247525	0.221924	1.11536	0.264697	0.390775
FvH4_1g03960	101.589	1.95153	0.473475	4.12172	3.76054e-05	0.000180844
FvH4_1g03970	110.312	-3.16568	0.620085	-5.10524	3.30383e-07	2.32598e-06
FvH4_1g03980	1821.28	0.6926	0.349095	1.98399	0.0472572	0.0964112
FvH4_1g03990	1200.28	0.61742	0.217742	2.83556	0.00457456	0.0130812
FvH4_1g04000	38.5808	-6.12254	1.40588	-4.35494	1.33101e-05	7.04357e-05
FvH4_1g04010	423.193	-0.361434	0.33806	-1.06914	0.285006	0.413322
FvH4_1g04020	324.591	-0.115966	0.581773	-0.199332	0.842003	0.910548
FvH4_1g04030	43.7327	-7.71217	1.16874	-6.59873	4.14702e-11	5.15405e-10
FvH4_1g04040	71.7086	-2.59477	0.328176	-7.90664	2.64431e-15	5.26438e-14
FvH4_1g04050	126.819	-1.31083	1.26365	-1.03733	0.29958	0.429133
FvH4_1g04051	4.94075	-0.23865	0.726867	-0.328327	0.742664	0.838261
FvH4_1g04070	14.2252	-0.908381	1.68033	-0.540596	0.588786	0.713978
FvH4_1g04080	650.253	-2.55957	0.711188	-3.59901	0.000319435	0.00124086
FvH4_1g04090	57.9861	-0.422601	0.264516	-1.59764	0.110123	0.193571
FvH4_1g04091	4.93997	-0.498616	0.803637	-0.62045	0.534962	0.664637
FvH4_1g04100	13.7318	-0.950301	0.688104	-1.38104	0.167266	0.271118
FvH4_1g04110	18.755	-1.03747	0.388445	-2.67083	0.00756635	0.0202067
FvH4_1g04120	288.127	1.19004	0.200478	5.936	2.92057e-09	2.86867e-08
FvH4_1g04130	32.3735	-2.91934	0.553558	-5.27378	1.33645e-07	1.00508e-06
FvH4_1g04140	12.0383	1.75494	1.35621	1.294	0.195664	0.307798
FvH4_1g04150	201.153	-4.01235	0.784703	-5.11321	3.16727e-07	2.23717e-06
FvH4_1g04160	369.433	-1.73995	0.28596	-6.08461	1.16775e-09	1.2147e-08
FvH4_1g04170	861.199	0.765364	0.35304	2.16792	0.0301645	0.066086
FvH4_1g04190	5.58248	-2.46999	1.05736	-2.336	0.0194911	0.0458561
FvH4_1g04210	403.727	-0.274111	0.606081	-0.452267	0.651076	0.763793
FvH4_1g04220	185.301	0.688615	0.206757	3.33055	0.000866741	0.00302186
FvH4_1g04230	386.437	-1.51568	0.136289	-11.1211	9.9022e-29	5.83307e-27
FvH4_1g04240	1.82922	-2.92246	2.59076	-1.12803	0.259306	0.384373
FvH4_1g04250	1051.13	-0.236489	0.494417	-0.478319	0.632423	0.749269
FvH4_1g04290	759.302	1.22062	0.592938	2.05859	0.0395332	0.0828866
FvH4_1g04310	1150.4	0.945383	0.244961	3.85932	0.000113704	0.000494289
FvH4_1g04320	238.409	-0.0223536	0.336676	-0.0663951	0.947063	0.979075
FvH4_1g04330	182.355	0.683715	0.294803	2.31923	0.0203827	0.0475994
FvH4_1g04340	78.5272	-0.149052	0.330727	-0.45068	0.65222	0.764589
FvH4_1g04350	1823.08	1.23037	0.554478	2.21898	0.0264882	0.059312
FvH4_1g04351	18.7063	-1.36649	0.441479	-3.09525	0.0019665	0.00623715
FvH4_1g04361	96.3173	-0.328219	0.431336	-0.760935	0.446696	0.581345
FvH4_1g04370	129.909	-0.863701	0.304969	-2.83209	0.00462449	0.0131959
FvH4_1g04380	10.2609	-4.09689	1.53397	-2.67078	0.00756746	0.0202072
FvH4_1g04401	19.2435	-1.83664	0.721168	-2.54676	0.0108729	0.0276496
FvH4_1g04420	612.411	-0.57297	0.414717	-1.38159	0.167098	0.270968
FvH4_1g04421	4.78579	1.95505	0.708048	2.76119	0.00575909	0.0159467
FvH4_1g04450	29.6715	-3.2741	0.549123	-5.96242	2.48532e-09	2.47393e-08
FvH4_1g04460	26.054	-1.1129	0.350495	-3.17522	0.00149721	0.00489753
FvH4_1g04490	504.211	0.0403007	0.224826	0.179253	0.857739	0.921421
FvH4_1g04500	380.545	-0.092767	0.456321	-0.203293	0.838906	0.90848
FvH4_1g04510	177.286	0.243563	0.325039	0.749336	0.453655	0.587982
FvH4_1g04520	70.1674	-0.69146	0.604731	-1.14342	0.252865	0.377166
FvH4_1g04540	94.6376	-5.91306	0.62653	-9.43779	3.80738e-21	1.2479e-19
FvH4_1g04541	3.11641	-2.60101	1.11859	-2.32525	0.0200585	0.0470108
FvH4_1g04560	79.3356	-0.155641	0.508983	-0.305789	0.759765	0.850597
FvH4_1g04570	61.5403	0.0960351	0.462774	0.207521	0.835603	0.906519
FvH4_1g04610	74.4484	-2.05581	0.444964	-4.62016	3.83438e-06	2.2448e-05
FvH4_1g04670	337.969	1.07152	0.147557	7.26172	3.82206e-13	6.16027e-12
FvH4_1g04680	235.623	1.36024	0.613295	2.21793	0.0265597	0.0594298
FvH4_1g04700	672.34	0.938557	0.502711	1.86699	0.0619026	0.120843
FvH4_1g04710	194.092	-0.527496	0.189816	-2.77899	0.00545282	0.0152182
FvH4_1g04720	244.474	1.11916	0.463474	2.41471	0.0157478	0.03816
FvH4_1g04721	491.692	1.90635	0.286426	6.65566	2.82035e-11	3.5776e-10
FvH4_1g04740	8.43382	-0.877616	0.938103	-0.935522	0.349519	0.481855
FvH4_1g04750	36.5501	-1.30229	0.368478	-3.53424	0.000408949	0.00155076
FvH4_1g04760	2.71749	5.0833	2.28059	2.22894	0.0258176	0.058047
FvH4_1g04770	3.88305	0	2.1727	0	1	1
FvH4_1g04790	1.30392	-3.30688	1.74902	-1.8907	0.0586642	0.115528
FvH4_1g04800	12.4774	-0.565951	1.75939	-0.321674	NA	NA
FvH4_1g04810	190.816	-0.335311	0.799328	-0.41949	0.674858	0.782628
FvH4_1g04820	117.614	-0.9987	0.171051	-5.83863	5.26322e-09	4.98083e-08
FvH4_1g04830	250.345	0.197342	0.326795	0.60387	0.54593	0.674329
FvH4_1g04840	8.68464	2.44429	1.45509	1.67982	0.092993	0.168691
FvH4_1g04841	92.1766	-0.372934	0.479649	-0.777515	0.436855	0.571652
FvH4_1g04850	6.27774	0.44676	0.617397	0.723619	0.469299	0.603026
FvH4_1g04860	16.3177	-1.0795	1.20958	-0.892456	0.372149	0.506428
FvH4_1g04870	69.7151	2.6325	0.330075	7.97548	1.51787e-15	3.07305e-14
FvH4_1g04892	54.131	2.11396	0.652078	3.24188	0.00118746	0.00397625
FvH4_1g04910	4.56637	1.46927	0.80064	1.83512	0.0664879	0.127867
FvH4_1g04920	14.509	-1.81159	0.864502	-2.09553	0.0361237	0.076871
FvH4_1g04930	209.988	1.04558	0.311928	3.35198	0.000802345	0.00282807
FvH4_1g04931	3.09725	1.12848	0.899164	1.25503	0.209468	0.325018
FvH4_1g04940	820.199	1.23753	0.171172	7.22976	4.83858e-13	7.63274e-12
FvH4_1g04950	2878.15	2.87392	0.449135	6.39878	1.56619e-10	1.82816e-09
FvH4_1g04960	331.771	0.0284066	0.194673	0.145919	0.883985	0.93841
FvH4_1g04970	306.902	1.15041	0.267035	4.3081	1.64665e-05	8.55182e-05
FvH4_1g04980	62.3195	0.6246	0.42914	1.45547	0.14554	0.243162
FvH4_1g04981	10.719	1.76821	0.635304	2.78325	0.00538169	0.015047
FvH4_1g04982	154.274	1.2918	0.28614	4.51458	6.34413e-06	3.57175e-05
FvH4_1g04983	25.277	-1.07431	0.517706	-2.07513	0.0379743	0.0801104
FvH4_1g04984	48.3833	-1.00365	0.306462	-3.27497	0.00105674	0.00359451
FvH4_1g04990	32.4088	-0.822229	0.48196	-1.70601	0.0880063	0.161301
FvH4_1g04991	70.1427	0.795581	0.526248	1.5118	0.130585	0.22271
FvH4_1g05000	55.8288	0.404828	0.41254	0.981305	0.326443	0.45794
FvH4_1g05030	19.8117	-1.40685	1.10773	-1.27003	0.204074	0.318487
FvH4_1g05040	313.738	-2.0116	0.411472	-4.8888	1.01452e-06	6.54854e-06
FvH4_1g05050	675.742	0.730094	0.213426	3.42082	0.000624315	0.00226801
FvH4_1g05070	118.537	0.552766	0.620431	0.89094	0.372962	0.507256
FvH4_1g05080	19.0737	1.23564	0.900628	1.37198	0.17007	0.274732
FvH4_1g05090	5.23281	4.26693	1.83431	2.32617	0.0200095	0.0469215
FvH4_1g05100	2.26438	0.498633	2.25736	0.220892	0.825176	0.89961
FvH4_1g05110	550.639	0.764406	0.771095	0.991325	0.321527	0.452905
FvH4_1g05120	37.4654	-0.8324	0.310954	-2.67692	0.00743015	0.0198998
FvH4_1g05130	34.5601	0.611751	0.438816	1.39409	0.163289	0.265895
FvH4_1g05140	2.01204	-0.186668	1.18454	-0.157588	0.874782	0.932647
FvH4_1g05150	285.463	-0.0740228	0.466298	-0.158746	0.873869	0.932043
FvH4_1g05170	1358.24	0.470191	0.269645	1.74374	0.0812047	0.150698
FvH4_1g05180	4910.12	2.24407	0.832186	2.6966	0.00700521	0.0189387
FvH4_1g05181	426.043	3.88844	0.379694	10.241	1.29899e-24	5.75866e-23
FvH4_1g05220	9.33445	0	2.45078	0	1	1
FvH4_1g05240	902.156	0.0564429	0.289152	0.195201	0.845235	0.91272
FvH4_1g05260	25.9644	-5.22412	0.836203	-6.24743	4.17249e-10	4.61011e-09
FvH4_1g05270	536.73	0.48986	0.284381	1.72254	0.0849709	0.156498
FvH4_1g05280	629.953	2.07495	0.319705	6.49021	8.57186e-11	1.03775e-09
FvH4_1g05300	0.844091	3.39663	2.15552	1.57578	0.115077	NA
FvH4_1g05310	205.167	-3.33853	0.519786	-6.42289	1.33709e-10	1.57787e-09
FvH4_1g05320	449.834	-1.33233	0.38378	-3.4716	0.000517362	0.00191988
FvH4_1g05350	827.909	-1.06214	0.349769	-3.0367	0.00239184	0.00741129
FvH4_1g05360	93.1703	0.384473	0.232116	1.65638	0.0976445	0.175613
FvH4_1g05370	413.57	3.62727	0.672738	5.39181	6.97529e-08	5.49361e-07
FvH4_1g05371	14.7895	-3.75023	0.717008	-5.23039	1.69156e-07	1.24855e-06
FvH4_1g05380	60.8527	-0.0149435	0.534821	-0.0279412	0.977709	1
FvH4_1g05390	3.13705	-0.712129	1.27425	-0.558862	0.576256	0.702425
FvH4_1g05400	2178.05	11.291	1.78844	6.31335	2.7306e-10	3.10146e-09
FvH4_1g05410	38.5035	-2.4481	0.577912	-4.23611	2.27424e-05	0.000114597
FvH4_1g05440	5.61098	-4.54213	1.52409	-2.98022	0.00288041	0.00873507
FvH4_1g05450	730.329	0.412774	0.501828	0.82254	0.410769	0.545721
FvH4_1g05460	676.708	0.221554	0.158304	1.39955	0.161648	0.263982
FvH4_1g05470	20.4627	-2.73372	0.569672	-4.79877	1.59646e-06	9.94941e-06
FvH4_1g05480	3260.69	-0.168207	0.230811	-0.728761	0.466148	0.60018
FvH4_1g05520	90.3057	0.13529	0.422949	0.319873	0.749064	0.843136
FvH4_1g05530	60.7855	5.64977	0.473697	11.927	8.56298e-33	6.32689e-31
FvH4_1g05540	96.669	-1.91407	0.557139	-3.43554	0.000591376	0.00216024
FvH4_1g05550	63.3128	0.0794677	0.242924	0.327129	0.74357	0.839009
FvH4_1g05561	1.29248	0.240875	1.63279	0.147523	0.882719	0.938095
FvH4_1g05600	28.5047	-0.0887298	0.508166	-0.174608	0.861388	0.923864
FvH4_1g05630	706.155	-4.67916	0.296443	-15.7843	3.98822e-56	9.32072e-54
FvH4_1g05640	172.004	-0.193482	0.587512	-0.329324	0.741911	0.837674
FvH4_1g05650	988.426	-0.243915	0.216851	-1.1248	0.260674	0.386002
FvH4_1g05670	13.4841	-4.49438	1.89784	-2.36816	NA	NA
FvH4_1g05680	907.104	-0.196034	0.218783	-0.896019	0.370243	0.504282
FvH4_1g05690	38.3324	-0.126506	0.353007	-0.358367	0.720068	0.819814
FvH4_1g05700	2.40062	-2.38936	1.27315	-1.87673	0.0605546	0.118649
FvH4_1g05710	123.508	-0.364896	0.279299	-1.30647	0.191392	0.302316
FvH4_1g05730	671.791	0.259309	0.336949	0.76958	0.441549	0.576392
FvH4_1g05740	443.879	-0.117627	0.177324	-0.663342	0.507111	0.638335
FvH4_1g05750	1.7904	0.550063	1.29398	0.425095	0.670768	0.779389
FvH4_1g05760	410.002	-0.0249842	0.222029	-0.112526	0.910406	0.954805
FvH4_1g05770	78.7572	-3.71254	1.2496	-2.97099	0.00296844	0.00897419
FvH4_1g05780	126.072	0.541867	0.313461	1.72866	0.0838703	0.154803
FvH4_1g05790	140.597	-2.27008	0.403627	-5.62419	1.8638e-08	1.61587e-07
FvH4_1g05800	274.454	-1.13956	0.261334	-4.36055	1.29736e-05	6.89265e-05
FvH4_1g05810	40.3322	0.284639	0.444373	0.640542	0.521821	0.652261
FvH4_1g05820	133.974	-6.50907	0.578285	-11.2558	2.16787e-29	1.33175e-27
FvH4_1g05831	0.713171	-2.87869	3.26856	-0.880721	0.378469	NA
FvH4_1g05840	37.2287	1.69527	0.419132	4.04472	5.23853e-05	0.000244166
FvH4_1g05850	1258.51	0.497122	0.263737	1.88491	0.0594419	0.116791
FvH4_1g05870	1005.88	1.10963	0.266846	4.15834	3.20575e-05	0.00015651
FvH4_1g05880	772.198	0.428984	0.193562	2.21626	0.0266738	0.0596478
FvH4_1g05910	132.112	0.635045	0.180698	3.5144	0.000440757	0.00166141
FvH4_1g05950	49.649	1.77815	0.535055	3.32331	0.000889563	0.00309176
FvH4_1g05960	157.976	-1.70279	0.861316	-1.97696	0.048046	0.0977791
FvH4_1g05970	225.057	0.357928	0.271966	1.31608	0.188147	0.297935
FvH4_1g05980	36.8657	-1.04678	0.634698	-1.64925	0.0990959	0.1776
FvH4_1g05990	6.62315	-2.35195	1.70036	-1.38321	0.166601	0.270264
FvH4_1g06000	4539.95	1.50498	0.364137	4.133	3.5806e-05	0.000172848
FvH4_1g06010	379.869	1.16923	0.36199	3.23002	0.00123783	0.00412756
FvH4_1g06040	171.355	0.308495	0.325146	0.948789	0.342728	0.475143
FvH4_1g06050	1.07151	-2.58753	2.73352	-0.946593	0.343846	NA
FvH4_1g06060	7.82412	-4.05505	0.982969	-4.12531	3.70239e-05	0.000178407
FvH4_1g06070	81.3807	0.230867	0.252886	0.912931	0.361279	0.494516
FvH4_1g06080	6.68836	-0.255382	0.692426	-0.368823	0.71226	0.813139
FvH4_1g06090	394.75	2.02808	0.390062	5.19937	1.99967e-07	1.45993e-06
FvH4_1g06100	89.6059	-0.571275	0.443574	-1.28789	0.197785	0.310565
FvH4_1g06110	259.198	-0.992765	0.23998	-4.13686	3.52089e-05	0.00017031
FvH4_1g06140	2.55723	-1.9397	1.73842	-1.11578	0.264515	0.390614
FvH4_1g06150	80.585	-0.161468	0.388661	-0.415445	0.677816	0.784715
FvH4_1g06170	356.705	-1.2585	0.574576	-2.19032	0.0285012	0.0630457
FvH4_1g06180	40.3138	-0.612141	0.433011	-1.41368	0.157455	0.258608
FvH4_1g06210	4.85113	-3.76159	1.78724	-2.10469	0.0353187	0.0754933
FvH4_1g06220	99.6181	0.87132	0.872227	0.99896	0.317814	0.449376
FvH4_1g06231	14.3581	-1.32831	1.93531	-0.686357	0.492488	0.624167
FvH4_1g06250	5.81641	-3.47615	1.50909	-2.30347	0.0212522	0.0492715
FvH4_1g06260	23.8484	0.72813	0.508955	1.43064	0.152534	0.252203
FvH4_1g06261	5.92538	1.19031	0.783359	1.5195	0.128637	0.220121
FvH4_1g06270	1524.98	1.59027	0.295906	5.37424	7.69081e-08	5.99785e-07
FvH4_1g06280	45.2019	1.76336	0.476289	3.70228	0.000213667	0.000868606
FvH4_1g06290	21.0502	-0.404859	4.22336	-0.0958616	0.92363	0.96314
FvH4_1g06300	33.8458	-1.38068	0.699423	-1.97403	0.0483781	0.0983248
FvH4_1g06301	2.3095	-3.61528	1.58854	-2.27585	0.022855	0.0523777
FvH4_1g06302	2.72404	-1.8631	1.38142	-1.34869	0.177436	0.284472
FvH4_1g06330	235.353	-1.45931	0.277348	-5.26167	1.42749e-07	1.06757e-06
FvH4_1g06340	4.44079	0	2.24816	0	1	1
FvH4_1g06350	5.42044	-1.04078	1.54469	-0.67378	0.500451	0.632187
FvH4_1g06360	257.005	1.98034	0.355927	5.5639	2.63816e-08	2.22968e-07
FvH4_1g06361	13.4597	-0.453651	0.690907	-0.656603	0.511436	0.642422
FvH4_1g06370	18.5224	1.34721	0.420429	3.20437	0.00135358	0.00447742
FvH4_1g06390	3463.37	-2.47776	0.582609	-4.25287	2.11045e-05	0.000106895
FvH4_1g06400	785.026	0.552311	0.311698	1.77194	0.0764041	0.143198
FvH4_1g06420	4.62682	-0.828473	0.694699	-1.19256	0.23304	0.353481
FvH4_1g06430	12.4121	0.198085	0.435857	0.454472	0.649489	0.762763
FvH4_1g06440	114.217	-5.49825	0.510219	-10.7762	4.45695e-27	2.36614e-25
FvH4_1g06450	7.96353	3.69068	0.959219	3.84759	0.000119287	0.000516572
FvH4_1g06461	4887.96	-0.681711	0.462356	-1.47443	0.140366	0.236262
FvH4_1g06480	482.596	0.834064	0.342122	2.43792	0.0147721	0.0360517
FvH4_1g06490	85.5578	-4.39319	0.475263	-9.2437	2.38108e-20	7.33461e-19
FvH4_1g06500	260.696	-0.735419	0.249183	-2.95132	0.0031642	0.00947673
FvH4_1g06510	48.0061	-5.81357	0.9867	-5.89194	3.81698e-09	3.68849e-08
FvH4_1g06520	879.516	0.169368	0.114313	1.48161	0.138444	0.233593
FvH4_1g06530	39.4856	-2.65147	0.803269	-3.30085	0.000963921	0.00331976
FvH4_1g06540	444.576	0.439603	0.357903	1.22828	0.219343	0.337192
FvH4_1g06560	7.53641	0	2.43581	0	1	1
FvH4_1g06570	246.478	-0.879364	0.212455	-4.13906	3.48736e-05	0.000168764
FvH4_1g06580	293.331	-0.0676399	0.257516	-0.262663	0.792811	0.876148
FvH4_1g06610	1173.9	0.813359	0.374843	2.16987	0.0300169	0.0658296
FvH4_1g06620	190.611	-0.0534452	0.322524	-0.165709	0.868386	0.928498
FvH4_1g06630	92.812	-7.92577	1.36388	-5.8112	6.20272e-09	5.80604e-08
FvH4_1g06640	296.693	-0.279709	0.620406	-0.450848	0.652099	0.764492
FvH4_1g06670	1.72314	-0.404861	2.59241	-0.156172	0.875898	0.933697
FvH4_1g06690	114.739	-0.455947	0.436087	-1.04554	0.295773	0.425094
FvH4_1g06700	42.8756	-0.229014	0.314303	-0.728639	0.466223	0.60018
FvH4_1g06710	121.727	1.76259	0.257873	6.83513	8.19298e-12	1.12489e-10
FvH4_1g06720	2224.64	0.189437	0.161322	1.17428	0.240284	0.362424
FvH4_1g06730	277.094	0.0905016	0.328418	0.275568	0.78288	0.868202
FvH4_1g06740	227.085	0.785628	0.619883	1.26738	0.205019	0.31973
FvH4_1g06750	1.6337	1.59212	1.27251	1.25117	0.210874	0.326704
FvH4_1g06760	160.863	0.00205202	0.489724	0.00419015	0.996657	1
FvH4_1g06761	37.1459	0.000833116	0.487507	0.00170893	0.998636	1
FvH4_1g06762	38.358	-0.162561	0.290033	-0.56049	0.575145	0.701389
FvH4_1g06763	8.50682	-1.31496	0.613572	-2.14313	0.0321026	0.0696226
FvH4_1g06770	0.811784	-1.56499	1.71954	-0.910121	0.362759	NA
FvH4_1g06780	2503.26	-0.64488	0.563065	-1.1453	0.252084	0.376282
FvH4_1g06790	102.891	-0.238294	0.203103	-1.17327	0.240688	0.362702
FvH4_1g06800	37.6446	0.948266	0.58436	1.62274	0.104644	0.185716
FvH4_1g06810	214.498	0.346197	0.358188	0.966524	0.333782	0.465835
FvH4_1g06820	1450.16	-0.717087	0.28646	-2.50327	0.0123052	0.0308003
FvH4_1g06830	106.42	0.203968	0.272412	0.748747	0.454009	0.588335
FvH4_1g06840	1.68883	1.81554	1.97451	0.919485	0.357842	0.490791
FvH4_1g06841	536.85	0.532893	0.649695	0.820221	0.41209	0.546969
FvH4_1g06850	141.735	-6.09524	1.44527	-4.21738	2.47155e-05	0.000123526
FvH4_1g06851	1.57459	-3.05284	2.54087	-1.2015	0.229559	0.349532
FvH4_1g06860	413.609	-0.12452	0.483028	-0.257791	0.796568	0.879298
FvH4_1g06870	192.506	0.00496482	0.277113	0.0179163	0.985706	1
FvH4_1g06910	216.261	1.82296	0.550096	3.31389	0.000920082	0.00318613
FvH4_1g06920	14.4798	0	4.56215	0	1	1
FvH4_1g06930	82.6422	0.917199	0.334138	2.74497	0.00605171	0.0166476
FvH4_1g06940	1073.78	0.260116	0.395596	0.657531	0.51084	0.641976
FvH4_1g06970	916.272	0.712905	0.354993	2.00822	0.0446195	0.0918341
FvH4_1g06990	585.803	-0.515297	0.326004	-1.58065	0.113959	0.199141
FvH4_1g07000	1061.46	0.686617	0.377309	1.81977	0.0687936	0.131373
FvH4_1g07030	103.057	-1.00875	0.277645	-3.63324	0.000279889	0.00110461
FvH4_1g07040	77.6856	0.192578	0.33211	0.579861	0.562009	0.689318
FvH4_1g07041	14.0564	-0.600703	0.874619	-0.686817	0.492198	0.623983
FvH4_1g07060	260.014	0.0762625	0.152961	0.498574	0.61808	0.737395
FvH4_1g07061	1.48161	2.38262	1.8587	1.28187	0.199888	0.312953
FvH4_1g07062	66.7474	2.25259	0.348938	6.45555	1.07826e-10	1.2887e-09
FvH4_1g07063	1.0985	5.24339	3.40923	1.538	0.124049	NA
FvH4_1g07070	5.07495	-2.53516	1.12665	-2.25018	0.0244378	0.0553558
FvH4_1g07071	33.1531	-1.92408	0.463294	-4.15305	3.28076e-05	0.000159736
FvH4_1g07080	42.7185	-0.191592	0.844209	-0.226948	0.820464	0.895978
FvH4_1g07090	145.137	-0.748113	0.292389	-2.55862	0.0105088	0.0268509
FvH4_1g07100	77.6939	-1.00501	0.351055	-2.86282	0.00419886	0.0121527
FvH4_1g07110	67.6691	-0.214854	0.222345	-0.96631	0.333889	0.465893
FvH4_1g07120	24.2286	0.277452	0.379604	0.730898	0.464841	0.598881
FvH4_1g07130	101.772	1.11535	0.257325	4.33441	1.46151e-05	7.67746e-05
FvH4_1g07140	370.848	0.0157285	0.315623	0.0498331	0.960255	0.98853
FvH4_1g07150	74.6148	-2.08617	0.638974	-3.26488	0.00109512	0.00370224
FvH4_1g07151	217.26	1.18672	0.567857	2.08982	0.0366338	0.0777632
FvH4_1g07160	817.376	1.75793	0.478914	3.67066	0.000241928	0.000971736
FvH4_1g07170	253.218	7.20328	0.957019	7.52678	5.20052e-14	9.26399e-13
FvH4_1g07180	91.3706	-0.52023	0.338627	-1.53629	0.124467	0.214202
FvH4_1g07181	34.9087	-6.48874	0.661435	-9.81009	1.01875e-22	3.78311e-21
FvH4_1g07200	2.49975	-1.75787	1.11534	-1.57608	0.115006	0.20071
FvH4_1g07210	203.581	-1.63695	0.161172	-10.1565	3.09966e-24	1.31711e-22
FvH4_1g07220	91.9709	-3.97934	0.452084	-8.80221	1.34143e-18	3.47914e-17
FvH4_1g07230	160.987	-0.312752	0.54462	-0.574257	0.565794	0.692855
FvH4_1g07231	6.26637	1.57393	0.683172	2.30386	0.0212303	0.0492473
FvH4_1g07240	152.198	-0.835194	0.284275	-2.93798	0.00330353	0.00984057
FvH4_1g07250	84.056	-0.581412	0.362077	-1.60577	0.108324	0.191002
FvH4_1g07270	189.375	-0.818205	0.261201	-3.13248	0.00173339	0.0055751
FvH4_1g07280	350.488	0.909517	0.235699	3.85881	0.000113939	0.000495211
FvH4_1g07290	710.167	0.159633	0.290095	0.550278	0.582128	0.707818
FvH4_1g07300	497.965	0.188225	0.534534	0.35213	0.724741	0.823651
FvH4_1g07320	60.0621	0.320681	0.46107	0.695513	0.486734	0.61877
FvH4_1g07340	183.916	-0.297813	0.434336	-0.685676	0.492918	0.624526
FvH4_1g07350	0.507069	-1.62663	2.64783	-0.614326	0.539	NA
FvH4_1g07370	75.2251	-1.90345	0.374527	-5.08227	3.72956e-07	2.60524e-06
FvH4_1g07380	23.0864	-1.81218	0.639348	-2.83442	0.00459091	0.013121
FvH4_1g07390	165.19	-1.32587	3.2811	-0.404094	0.686144	0.791883
FvH4_1g07401	1408.5	-1.19347	0.643845	-1.85367	0.0637866	0.123735
FvH4_1g07410	95.6986	-1.49248	0.27619	-5.40381	6.52397e-08	5.16085e-07
FvH4_1g07420	18.3837	-0.154353	0.378177	-0.40815	0.683163	0.78929
FvH4_1g07430	16.8068	-4.80162	0.893354	-5.37483	7.66555e-08	5.98247e-07
FvH4_1g07432	7.10659	-3.63453	0.955163	-3.80514	0.000141725	0.000602817
FvH4_1g07450	147.421	0.819406	0.953321	0.859528	0.390049	0.52471
FvH4_1g07480	26.9281	-4.86514	1.28759	-3.77848	0.000157791	0.000662499
FvH4_1g07500	388.005	-0.597255	0.130674	-4.57057	4.86403e-06	2.79555e-05
FvH4_1g07510	487.325	-0.815345	0.268961	-3.03146	0.00243371	0.00752042
FvH4_1g07520	256.207	-0.544088	0.160833	-3.38293	0.000717159	0.00256438
FvH4_1g07530	403.876	-1.06307	0.68315	-1.55612	0.119678	0.207495
FvH4_1g07540	145.797	0.936834	0.27072	3.46053	0.000539109	0.00199165
FvH4_1g07560	40.4872	-4.2688	0.816081	-5.23086	1.68724e-07	1.24579e-06
FvH4_1g07600	706.536	0.0351843	0.353506	0.0995293	0.920718	0.961404
FvH4_1g07620	11.2119	-4.69479	1.74496	-2.69048	0.00713489	0.0192408
FvH4_1g07640	101.458	-0.367433	0.251019	-1.46376	0.143258	0.240059
FvH4_1g07650	199.187	1.16647	0.371427	3.14052	0.00168647	0.00544784
FvH4_1g07670	5.5895	-5.48809	1.31331	-4.17884	2.93003e-05	0.000144592
FvH4_1g07671	91.182	-0.866253	0.715677	-1.2104	0.226127	0.345407
FvH4_1g07680	2.25389	-0.990507	1.73097	-0.572228	0.567168	0.694141
FvH4_1g07690	284.622	-0.979524	0.592385	-1.65353	0.0982236	0.176315
FvH4_1g07700	114.891	0.175127	0.446832	0.39193	0.69511	0.799142
FvH4_1g07710	2.02201	-3.11112	2.08233	-1.49406	0.135161	0.22906
FvH4_1g07730	60.4116	-0.350718	0.32547	-1.07757	0.281224	0.409438
FvH4_1g07740	1305.81	0.253598	0.26463	0.958314	0.337904	0.46991
FvH4_1g07750	235.112	0.380641	0.185456	2.05246	0.0401249	0.0839145
FvH4_1g07760	1.66137	5.12503	2.40345	2.13236	0.0329769	0.0712455
FvH4_1g07770	100.898	0.419325	0.335737	1.24897	0.211676	0.327654
FvH4_1g07790	19.6089	-1.17749	0.510077	-2.30845	0.020974	0.0487473
FvH4_1g07800	38.9729	-4.2883	0.6332	-6.77243	1.26637e-11	1.70177e-10
FvH4_1g07820	67.4177	-0.0610215	0.614133	-0.099362	0.920851	0.961404
FvH4_1g07830	26.2894	2.58922	0.753543	3.43607	0.000590226	0.00215677
FvH4_1g07860	921.653	0.406898	0.107067	3.80039	0.00014447	0.000612789
FvH4_1g07870	1.20202	0.556933	2.58607	0.215359	0.829488	NA
FvH4_1g07880	7.28841	-2.35522	0.75897	-3.10317	0.00191457	0.00609132
FvH4_1g07900	73.007	-3.36818	0.409983	-8.21542	2.11416e-16	4.58694e-15
FvH4_1g07910	172.622	1.07037	0.312354	3.4268	0.00061074	0.00222417
FvH4_1g07920	714.652	0.40121	0.370472	1.08297	0.278821	0.407181
FvH4_1g07921	153.277	-0.263816	0.205372	-1.28457	0.198942	0.311881
FvH4_1g07930	780.396	0.4586	0.289594	1.5836	0.113285	0.198141
FvH4_1g07940	244.108	0.780554	0.346196	2.25465	0.024155	0.0548307
FvH4_1g07950	191.602	-0.689325	0.453669	-1.51944	0.128651	0.220127
FvH4_1g07960	732.789	0.957231	0.499377	1.91685	0.0552572	0.109988
FvH4_1g07970	222.746	0.182092	0.237452	0.766858	0.443166	0.577897
FvH4_1g07980	85.5299	-3.2555	0.473803	-6.87099	6.37588e-12	8.873e-11
FvH4_1g07981	318.048	-4.46391	0.768864	-5.80585	6.40406e-09	5.96594e-08
FvH4_1g07990	130.114	0.831613	0.346432	2.40051	0.0163723	0.0394497
FvH4_1g08000	415.669	0.614026	0.341036	1.80047	0.0717859	0.135941
FvH4_1g08010	45.1785	-1.61403	0.369678	-4.36604	1.26519e-05	6.74006e-05
FvH4_1g08020	308.34	-1.74979	0.197573	-8.8564	8.26407e-19	2.18019e-17
FvH4_1g08030	19.416	1.30585	0.699067	1.86799	0.0617639	0.120627
FvH4_1g08040	33.1048	-0.519584	0.435083	-1.19422	0.232393	0.352822
FvH4_1g08050	277.806	0.383635	0.229164	1.67406	0.0941184	0.170297
FvH4_1g08060	156.242	-0.225925	0.402581	-0.56119	0.574668	0.700967
FvH4_1g08061	86.6812	-0.402205	0.258711	-1.55465	0.120029	0.207939
FvH4_1g08080	41.5119	-1.0306	1.04461	-0.986593	0.323842	0.455391
FvH4_1g08090	1572.03	1.87792	0.250721	7.49005	6.88461e-14	1.21632e-12
FvH4_1g08100	192.441	-0.705262	0.660097	-1.06842	0.285331	0.413653
FvH4_1g08110	484.065	0.743803	0.569838	1.30529	0.191794	0.302773
FvH4_1g08120	397.902	0.664133	0.242415	2.73966	0.00615032	0.0168804
FvH4_1g08130	203.854	1.15531	0.274101	4.21489	2.49903e-05	0.000124697
FvH4_1g08140	131.77	-0.07445	0.290501	-0.256281	0.797734	0.880225
FvH4_1g08141	684.545	0.318754	0.512277	0.622229	0.533791	0.663643
FvH4_1g08150	478.749	0.238117	0.363308	0.655413	0.512202	0.642832
FvH4_1g08160	161.482	-5.2922	0.868285	-6.095	1.09436e-09	1.14334e-08
FvH4_1g08180	394.905	0.634729	0.317074	2.00183	0.0453026	0.0930504
FvH4_1g08190	49.4097	-4.09484	0.532631	-7.68796	1.49504e-14	2.79036e-13
FvH4_1g08230	7.70401	-5.42083	1.52245	-3.5606	0.000370009	0.0014176
FvH4_1g08240	1051.42	0.534633	0.186715	2.86337	0.00419157	0.0121394
FvH4_1g08250	186.401	3.62526	0.47507	7.63099	2.3296e-14	4.24481e-13
FvH4_1g08260	162.374	0.531389	0.160514	3.31056	0.000931109	0.00322172
FvH4_1g08261	212.515	-0.341305	0.225539	-1.51328	0.130208	0.222243
FvH4_1g08280	156.201	0.361091	0.304985	1.18396	0.236428	0.357904
FvH4_1g08281	36.651	-0.0753194	0.270437	-0.27851	0.780621	0.866576
FvH4_1g08290	13.1232	0.858077	1.23138	0.696841	0.485902	0.618079
FvH4_1g08300	2859.1	-0.361709	0.469209	-0.770891	0.440772	0.575621
FvH4_1g08310	80.0428	-0.0329346	1.37645	-0.0239272	0.980911	1
FvH4_1g08320	157.028	-4.60038	0.441177	-10.4275	1.85643e-25	8.92953e-24
FvH4_1g08340	1.2088	0	4.56215	0	1	NA
FvH4_1g08350	303.849	-1.82873	0.556632	-3.28534	0.00101858	0.00348456
FvH4_1g08360	95.669	-2.3003	0.428243	-5.37149	7.80891e-08	6.08111e-07
FvH4_1g08370	54.0138	-1.01271	0.455361	-2.22397	0.0261506	0.0586731
FvH4_1g08390	8.49308	-4.73211	1.17697	-4.0206	5.80493e-05	0.000268701
FvH4_1g08400	171.546	-0.352825	0.557735	-0.632603	0.526993	0.657205
FvH4_1g08410	2.93493	0.0208851	1.22884	0.0169958	0.98644	1
FvH4_1g08420	200.798	0.197076	0.32371	0.608802	0.542655	0.67151
FvH4_1g08430	379.752	0.458633	0.266684	1.71976	0.0854756	0.157306
FvH4_1g08440	10.513	-4.68574	1.47572	-3.17523	0.00149717	0.00489753
FvH4_1g08450	460.128	1.49456	0.281983	5.30019	1.15683e-07	8.78591e-07
FvH4_1g08451	16.8744	-4.89735	1.18749	-4.12414	3.72126e-05	0.000179236
FvH4_1g08452	21.2545	-5.89792	1.17193	-5.03266	4.83728e-07	3.31653e-06
FvH4_1g08453	4.66982	5.99201	1.47524	4.06172	4.87117e-05	0.00022853
FvH4_1g08454	23.8986	3.57122	1.07765	3.31389	0.000920076	0.00318613
FvH4_1g08510	717.305	-1.78827	0.36759	-4.86486	1.1454e-06	7.32955e-06
FvH4_1g08530	0.950047	0	4.56215	0	1	NA
FvH4_1g08531	901.94	-0.404862	1.71808	-0.235648	0.813706	0.891667
FvH4_1g08540	625.381	4.77498	2.06922	2.30762	0.02102	0.0488438
FvH4_1g08541	1.87588	-2.97459	1.37439	-2.1643	0.0304411	0.0666104
FvH4_1g08550	2.50086	-4.39198	1.66941	-2.63086	0.00851695	0.0223809
FvH4_1g08570	2.71937	-0.361037	1.05345	-0.342719	0.73181	0.828969
FvH4_1g08580	31.5923	-0.908606	0.693021	-1.31108	0.189831	0.300335
FvH4_1g08590	322.763	-0.35755	0.197558	-1.80985	0.0703191	0.133681
FvH4_1g08600	172.967	0.823306	0.306617	2.68513	0.00725012	0.0194978
FvH4_1g08610	24.0282	-2.21785	0.399986	-5.54482	2.9426e-08	2.46854e-07
FvH4_1g08620	113.938	1.31021	0.272632	4.80579	1.54139e-06	9.63132e-06
FvH4_1g08630	109.364	-0.714341	0.438273	-1.6299	0.103122	0.18347
FvH4_1g08640	106.577	-0.367386	0.343409	-1.06982	0.284701	0.412991
FvH4_1g08650	182	0.449089	0.259146	1.73296	0.0831031	0.153624
FvH4_1g08660	22.4589	-0.968904	0.77844	-1.24467	0.213251	0.329614
FvH4_1g08670	30.0685	-4.46506	0.638205	-6.99629	2.62828e-12	3.81828e-11
FvH4_1g08690	134.065	-0.188185	0.199449	-0.943526	0.345412	0.477663
FvH4_1g08691	32.7253	-0.363916	0.319423	-1.13929	0.254581	0.379226
FvH4_1g08700	28.0191	-0.933049	0.447246	-2.08621	0.0369596	0.0783234
FvH4_1g08701	8.22806	-0.773263	0.612532	-1.2624	0.206804	0.321929
FvH4_1g08730	329.437	0.376452	0.344039	1.09421	0.273861	0.401301
FvH4_1g08750	10.5	0.476855	0.504936	0.944387	0.344972	0.477269
FvH4_1g08760	8649.12	1.376	0.347789	3.95642	7.60827e-05	0.000343956
FvH4_1g08770	20.1178	-1.4153	0.845127	-1.67466	0.0940006	0.170127
FvH4_1g08780	4.15356	0	4.27927	0	1	1
FvH4_1g08790	12.8199	-0.404861	2.12772	-0.190279	0.84909	0.915332
FvH4_1g08840	3041.36	0.14977	0.450006	0.332818	0.739272	0.83544
FvH4_1g08850	1.48223	-2.91724	1.99454	-1.46261	0.143575	0.240533
FvH4_1g08870	30.416	5.05099	0.532206	9.49067	2.29561e-21	7.68814e-20
FvH4_1g08880	237.726	0.872412	0.264195	3.30215	0.000959459	0.00330545
FvH4_1g08890	5185.84	0.851215	0.158645	5.36555	8.07043e-08	6.27567e-07
FvH4_1g08900	28.5127	-3.40856	0.856643	-3.97898	6.92129e-05	0.000315352
FvH4_1g08910	62.9966	1.61515	0.584527	2.76317	0.00572437	0.0158628
FvH4_1g08920	55.4565	-0.210922	0.248107	-0.850125	0.395255	0.530089
FvH4_1g08930	1.67061	1.0236	1.27947	0.80002	0.423699	0.558413
FvH4_1g08940	2396.42	0.318997	0.22001	1.44992	0.14708	0.245221
FvH4_1g08950	199.801	-0.749506	0.211338	-3.54649	0.000390401	0.0014883
FvH4_1g08960	52.1376	0.33847	0.413152	0.819238	0.41265	0.547442
FvH4_1g08970	44.7759	-1.19801	0.480691	-2.49228	0.0126927	0.0315718
FvH4_1g08980	0.91642	-1.64946	2.56065	-0.644156	0.519474	NA
FvH4_1g09010	113.447	-0.0329632	0.332407	-0.0991652	0.921007	0.961422
FvH4_1g09020	624.669	-1.48458	0.286296	-5.18547	2.15474e-07	1.56253e-06
FvH4_1g09021	1.4079	1.57866	2.13568	0.739181	0.459797	0.593769
FvH4_1g09040	196.235	-1.30104	1.71618	-0.758104	0.448389	0.582948
FvH4_1g09050	481.378	0.580272	0.289177	2.00663	0.0447887	0.0921092
FvH4_1g09070	1142.75	-5.70745	0.528451	-10.8003	3.42952e-27	1.84807e-25
FvH4_1g09080	468.069	-0.352855	0.390423	-0.903775	0.366115	0.499894
FvH4_1g09090	221.438	-2.31045	0.41709	-5.53945	3.03423e-08	2.53768e-07
FvH4_1g09100	12.0193	-2.29639	0.504841	-4.54874	5.39679e-06	3.07299e-05
FvH4_1g09110	83.4465	-0.933146	0.374728	-2.49019	0.0127673	0.0317368
FvH4_1g09130	135.892	0.236492	0.3562	0.663929	0.506736	0.638049
FvH4_1g09140	211.396	0.656812	0.317925	2.06593	0.0388349	0.0816855
FvH4_1g09150	497.874	-1.5679	0.641996	-2.44223	0.0145968	0.0356847
FvH4_1g09160	1273.04	0.164945	0.450258	0.366334	0.714116	0.814942
FvH4_1g09180	130.071	-6.92006	0.808022	-8.5642	1.08828e-17	2.65899e-16
FvH4_1g09190	413.714	10.9565	1.00039	10.9522	6.48465e-28	3.65949e-26
FvH4_1g09200	3339.65	3.07905	0.367526	8.37779	5.39328e-17	1.23434e-15
FvH4_1g09210	942.567	0.674705	0.174782	3.86026	0.000113265	0.000492777
FvH4_1g09220	489.621	-9.56205	1.13175	-8.44889	2.94095e-17	6.92589e-16
FvH4_1g09230	28.1775	-4.83851	1.28871	-3.75453	0.000173669	0.000719889
FvH4_1g09250	326.43	-6.05895	0.5921	-10.233	1.4112e-24	6.20493e-23
FvH4_1g09251	21.0503	-2.03119	0.588108	-3.45376	0.000552825	0.00203463
FvH4_1g09260	125.786	1.41956	0.337388	4.20749	2.58218e-05	0.000128577
FvH4_1g09270	3.49166	-2.81983	1.06168	-2.656	0.00790738	0.0209768
FvH4_1g09280	5.62083	-0.599483	0.724492	-0.827452	0.407981	0.542822
FvH4_1g09290	0.80866	-0.0841682	1.61254	-0.052196	0.958373	NA
FvH4_1g09300	4440.74	3.38545	0.276907	12.2259	2.25936e-34	1.82626e-32
FvH4_1g09310	679.787	0.345922	0.412397	0.83881	0.401576	0.536471
FvH4_1g09330	4.49582	-1.72088	1.02833	-1.67346	0.0942366	0.170482
FvH4_1g09360	1976.61	-1.71033	0.558287	-3.06354	0.00218736	0.00684379
FvH4_1g09380	12.3993	-0.13683	0.809933	-0.16894	0.865844	0.927348
FvH4_1g09390	760.422	0.0672769	0.255006	0.263825	0.791915	0.875287
FvH4_1g09400	1203.3	0.409844	0.233218	1.75734	0.0788595	0.146992
FvH4_1g09440	338.277	0.50307	0.362566	1.38753	0.165281	0.268671
FvH4_1g09450	283.9	0.823045	0.270779	3.03954	0.00236938	0.00735229
FvH4_1g09453	3.46222	-2.60579	1.69681	-1.5357	0.124612	0.214412
FvH4_1g09454	39.7236	-1.15197	0.355032	-3.2447	0.00117575	0.00393952
FvH4_1g09500	71.2254	-1.66815	1.54677	-1.07847	0.280824	0.409106
FvH4_1g09520	6.07155	3.75496	1.34942	2.78264	0.00539178	0.0150674
FvH4_1g09530	769.057	0.310403	0.46985	0.660642	0.508842	0.639921
FvH4_1g09540	271.484	-0.368549	0.166773	-2.20988	0.0271134	0.0604173
FvH4_1g09550	75.0456	-0.44431	0.226488	-1.96174	0.049793	0.10069
FvH4_1g09560	63.3138	-6.34821	1.78035	-3.56571	NA	NA
FvH4_1g09571	50.33	0.128285	0.454833	0.282048	0.777906	0.864567
FvH4_1g09580	134.381	-5.39803	0.631185	-8.55221	1.20749e-17	2.93944e-16
FvH4_1g09610	357.648	-1.84651	0.900103	-2.05144	0.0402239	0.0840738
FvH4_1g09620	108.669	0.489722	0.988833	0.495252	0.620422	0.739318
FvH4_1g09630	99.9667	-3.06005	0.304148	-10.0611	8.21043e-24	3.35613e-22
FvH4_1g09640	13226.6	2.38123	0.436116	5.46008	4.75933e-08	3.84845e-07
FvH4_1g09650	132.448	-0.681308	0.236385	-2.8822	0.00394909	0.0115194
FvH4_1g09660	4.9127	-2.34349	1.09293	-2.14422	0.0320151	0.0694679
FvH4_1g09670	809.605	0.860888	0.331562	2.59646	0.00941886	0.0244288
FvH4_1g09671	84.4581	1.48096	0.319962	4.62856	3.68224e-06	2.16376e-05
FvH4_1g09680	319.776	0.10733	0.144501	0.742764	0.457625	0.591736
FvH4_1g09690	622.062	-0.710533	0.299277	-2.37416	0.0175888	0.0419683
FvH4_1g09691	12.4014	-0.574133	0.606565	-0.946532	0.343877	0.476153
FvH4_1g09700	35.2353	-0.852629	0.508512	-1.67671	0.0935987	0.169556
FvH4_1g09701	13.0196	-0.920547	0.506553	-1.81728	0.0691748	0.131937
FvH4_1g09716	34.9878	-1.08751	1.13524	-0.957958	0.338084	0.470099
FvH4_1g09717	36.9957	-1.2618	0.304645	-4.14187	3.44482e-05	0.000166855
FvH4_1g09720	38.1146	-0.529534	0.564096	-0.938729	0.34787	0.480012
FvH4_1g09730	84.4251	-1.23059	0.365263	-3.36904	0.000754296	0.00267803
FvH4_1g09750	181.763	0.272571	0.254779	1.06983	0.284696	0.412991
FvH4_1g09751	93.2515	-0.147413	0.311838	-0.472724	0.63641	0.752293
FvH4_1g09760	453.347	0.858254	0.307745	2.78885	0.00528953	0.0148221
FvH4_1g09770	10.7448	2.4193	4.43955	0.544942	0.585794	0.711148
FvH4_1g09790	206.215	-0.629725	0.458073	-1.37473	0.169216	0.273681
FvH4_1g09800	408.343	1.88692	0.244846	7.70657	1.29249e-14	2.41861e-13
FvH4_1g09810	179.938	-0.57216	0.372633	-1.53545	0.124673	0.214499
FvH4_1g09820	10.7421	-2.30225	1.59323	-1.44502	0.148453	0.246948
FvH4_1g09830	673.689	-1.05422	0.716319	-1.47172	0.141096	0.237263
FvH4_1g09831	449.905	-0.206042	0.382726	-0.538355	0.590332	0.714973
FvH4_1g09860	69.8782	-0.026494	0.227715	-0.116347	0.907377	0.952846
FvH4_1g09870	520.739	0.233093	0.460678	0.505977	0.612873	0.73338
FvH4_1g09890	22.6589	-0.370063	0.434081	-0.852522	0.393925	0.5287
FvH4_1g09900	27.8562	0	4.56215	0	1	1
FvH4_1g09940	444.787	0.0914311	0.287305	0.318237	0.750305	0.843962
FvH4_1g09950	0.699932	2.91216	2.95919	0.984105	0.325064	NA
FvH4_1g09960	778.769	1.08561	0.253481	4.2828	1.84553e-05	9.48164e-05
FvH4_1g09970	40.4272	-1.38737	0.35252	-3.93557	8.29985e-05	0.000371781
FvH4_1g09980	2925.14	4.34266	0.620214	7.00188	2.52553e-12	3.67647e-11
FvH4_1g09990	536.719	0.761544	0.226341	3.36459	0.000766575	0.00271848
FvH4_1g10000	258.788	0.897867	0.269375	3.33315	0.000858681	0.00300008
FvH4_1g10010	1212.07	0.620832	0.205316	3.02378	0.00249637	0.00768976
FvH4_1g10030	54.6612	0.063134	0.232566	0.271467	0.786032	0.870485
FvH4_1g10040	6.00412	2.46351	2.11102	1.16698	0.24322	0.365698
FvH4_1g10070	199.913	0.495068	0.203841	2.4287	0.0151532	0.0368937
FvH4_1g10130	292.167	0.0705378	0.292973	0.240765	0.809737	0.888908
FvH4_1g10140	396.7	-0.152324	0.646898	-0.235469	0.813845	0.891667
FvH4_1g10150	329.12	1.08533	0.277079	3.91705	8.96407e-05	0.00039904
FvH4_1g10160	933.815	1.134	0.341436	3.32127	0.000896083	0.00311208
FvH4_1g10170	273.716	0.495599	0.357832	1.38501	0.166051	0.269678
FvH4_1g10180	1560.36	3.70784	0.427386	8.67563	4.1127e-18	1.03424e-16
FvH4_1g10190	337.195	0.642368	0.231293	2.77729	0.00548136	0.015285
FvH4_1g10191	99.6354	-3.2211	0.584008	-5.51551	3.47769e-08	2.87149e-07
FvH4_1g10192	3.16547	3.86312	1.65476	2.33454	0.0195673	0.0460002
FvH4_1g10210	17.713	-3.6779	1.03332	-3.5593	0.000371845	0.00142336
FvH4_1g10220	48.5842	0.181989	0.345756	0.526353	0.598643	0.721897
FvH4_1g10230	99.0561	-1.29892	0.458549	-2.83267	0.00461615	0.0131791
FvH4_1g10240	342.774	1.14405	0.423284	2.70279	0.00687609	0.0186224
FvH4_1g10250	588.852	0.415422	0.325443	1.27648	0.201785	0.315258
FvH4_1g10260	391.415	0.660241	0.179725	3.67363	0.00023913	0.000961752
FvH4_1g10270	122.467	0.0975264	0.419741	0.232349	0.816267	0.893204
FvH4_1g10271	52.3209	-0.362974	0.613489	-0.591655	0.554081	0.681981
FvH4_1g10280	202.65	-1.20085	0.347078	-3.45988	0.000540421	0.00199546
FvH4_1g10290	467.652	2.05721	0.348029	5.91104	3.39951e-09	3.3014e-08
FvH4_1g10300	134.096	2.03891	0.368698	5.53004	3.20151e-08	2.66909e-07
FvH4_1g10310	379.165	3.61492	0.496694	7.27795	3.3893e-13	5.49988e-12
FvH4_1g10330	63.805	-1.02179	0.303422	-3.36755	0.000758403	0.00269038
FvH4_1g10340	1968.91	-0.409573	0.290763	-1.40861	0.158949	0.260565
FvH4_1g10350	159.262	-0.312169	0.445596	-0.700564	0.483575	0.615957
FvH4_1g10370	98.3149	-0.617251	0.413498	-1.49275	0.135502	0.229566
FvH4_1g10380	8.21165	-3.15532	1.06999	-2.94893	0.00318879	0.00954505
FvH4_1g10390	34.358	-3.48364	0.494163	-7.04958	1.79453e-12	2.65184e-11
FvH4_1g10400	14.8533	-3.48274	0.905578	-3.84588	0.000120121	0.000519976
FvH4_1g10430	4.29523	-0.369283	1.33966	-0.275655	0.782813	0.868173
FvH4_1g10440	235.173	-0.121723	0.259993	-0.468177	0.639658	0.754721
FvH4_1g10450	490.635	0.182453	0.224185	0.813852	0.41573	0.550478
FvH4_1g10460	25.3404	-4.00554	0.544948	-7.35032	1.97736e-13	3.30857e-12
FvH4_1g10470	223.319	-0.29816	0.400007	-0.745385	0.456039	0.590289
FvH4_1g10471	3.96975	-2.69911	0.942885	-2.86261	0.00420165	0.0121555
FvH4_1g10480	11.9176	-3.58255	1.68268	-2.12907	0.0332482	0.0717644
FvH4_1g10490	369.381	0.379298	0.168068	2.25681	0.0240202	0.0545949
FvH4_1g10501	821.386	-0.181986	0.234002	-0.777711	0.436739	0.571536
FvH4_1g10510	169.835	0.522892	0.301395	1.73491	0.0827574	0.15309
FvH4_1g10520	4.86341	-4.09701	1.42409	-2.87693	0.00401565	0.0116866
FvH4_1g10521	373.424	0.28491	0.25368	1.12311	0.26139	0.386823
FvH4_1g10540	116.737	-0.836478	0.272943	-3.06466	0.00217916	0.00682508
FvH4_1g10550	13.2375	-1.37458	0.775712	-1.77203	0.0763903	0.143184
FvH4_1g10560	123.765	1.76396	0.253783	6.95069	3.63501e-12	5.20695e-11
FvH4_1g10570	27.23	-4.30059	1.12069	-3.83746	0.000124315	0.000535757
FvH4_1g10572	5.63269	3.04243	2.23542	1.36101	0.173509	0.279133
FvH4_1g10580	7.16277	-2.4963	1.06581	-2.34217	0.0191722	0.0452145
FvH4_1g10640	28.7144	-6.93427	1.2741	-5.44247	5.25476e-08	4.21891e-07
FvH4_1g10661	183.011	-3.68184	0.437258	-8.42028	3.75589e-17	8.73032e-16
FvH4_1g10670	19.5849	0.257326	0.344719	0.74648	0.455378	0.589575
FvH4_1g10720	15.0075	-2.21474	0.515486	-4.29641	1.73585e-05	8.97389e-05
FvH4_1g10740	78.4316	-4.89019	0.44671	-10.9471	6.85954e-28	3.86092e-26
FvH4_1g10750	1091.05	-1.03716	0.301739	-3.43727	0.000587608	0.00214867
FvH4_1g10770	184.512	-2.83181	0.62996	-4.49522	6.94968e-06	3.8842e-05
FvH4_1g10780	230.942	0.457545	0.248692	1.83981	0.0657967	0.126811
FvH4_1g10810	233.974	-0.106937	0.173377	-0.616787	0.537375	0.666942
FvH4_1g10840	43.7229	-3.78001	0.786007	-4.80912	1.51594e-06	9.48608e-06
FvH4_1g10850	35.5374	1.09722	0.631357	1.73787	0.0822331	0.152343
FvH4_1g10851	24.605	0.143447	0.336372	0.426454	0.669777	0.778594
FvH4_1g10860	216.358	-1.77271	0.332802	-5.32662	1.00056e-07	7.66678e-07
FvH4_1g10880	58.71	1.73654	0.410706	4.22818	2.35587e-05	0.000118239
FvH4_1g10900	35.752	-2.36407	0.54169	-4.36424	1.27564e-05	6.78733e-05
FvH4_1g10910	47.1535	-1.79557	0.765008	-2.34713	0.0189189	0.0447005
FvH4_1g10920	145.234	0.0176281	0.268268	0.0657108	0.947608	0.97942
FvH4_1g10930	226.976	-1.30539	0.737211	-1.77072	0.0766073	0.143454
FvH4_1g10940	648.264	-0.443659	0.224682	-1.97461	0.0483128	0.09822
FvH4_1g10970	1.33566	-1.04013	1.60754	-0.647033	0.517611	0.648232
FvH4_1g10980	84.8884	0.23233	0.267122	0.869753	0.384436	0.518864
FvH4_1g10990	138.255	-0.133961	0.211151	-0.634432	0.525799	0.656287
FvH4_1g10991	282.824	-0.249075	0.311204	-0.800357	0.423504	0.558259
FvH4_1g11000	575.297	0.367982	0.200915	1.83153	0.0670219	0.128779
FvH4_1g11020	137.462	-5.00281	0.585025	-8.55145	1.21551e-17	2.95307e-16
FvH4_1g11040	0.886034	-2.84858	3.28126	-0.868137	0.385319	NA
FvH4_1g11070	1261.97	1.06565	0.652221	1.63388	0.102284	0.182204
FvH4_1g11071	42.8805	-0.770185	0.606096	-1.27073	0.203825	0.318121
FvH4_1g11080	504.375	-1.32683	0.402121	-3.29958	0.000968279	0.00333157
FvH4_1g11100	989.763	0.675067	0.214399	3.14865	0.00164025	0.00531291
FvH4_1g11110	2715.41	0.337316	0.220969	1.52653	0.126877	0.217629
FvH4_1g11120	283.142	1.28644	0.367098	3.50434	0.000457734	0.00171698
FvH4_1g11140	17.0456	-6.01075	1.21542	-4.94543	7.59749e-07	5.02163e-06
FvH4_1g11150	522.061	-0.272295	0.266532	-1.02162	0.30696	0.437111
FvH4_1g11170	142.107	0.767926	0.5287	1.45248	0.146368	0.244261
FvH4_1g11181	29.7332	0.864576	0.274732	3.14698	0.00164964	0.0053401
FvH4_1g11190	522.569	0.124857	0.17256	0.723561	0.469336	0.603035
FvH4_1g11200	226.766	0.825799	0.355756	2.32125	0.0202733	0.0473853
FvH4_1g11210	919.683	0.27659	0.33801	0.818291	0.413191	0.547893
FvH4_1g11220	3.54849	-2.64998	1.11709	-2.37221	0.0176819	0.0421391
FvH4_1g11230	19.4329	-2.1223	0.632228	-3.35685	0.000788349	0.00278376
FvH4_1g11240	265.789	-0.934327	0.325271	-2.87246	0.00407294	0.0118373
FvH4_1g11260	716.227	0.46723	0.343527	1.3601	0.173799	0.279516
FvH4_1g11280	0.629657	-3.09048	2.65927	-1.16215	0.245174	NA
FvH4_1g11290	107.496	-0.854288	0.31747	-2.69092	0.00712548	0.0192228
FvH4_1g11300	3735.35	-0.618568	0.508209	-1.21715	0.223546	0.342268
FvH4_1g11310	351.846	-1.12395	0.351394	-3.19855	0.0013812	0.00455687
FvH4_1g11320	201.538	0.00308647	0.378391	0.00815684	0.993492	1
FvH4_1g11330	37.5368	-2.29603	1.52026	-1.51029	0.130969	0.223223
FvH4_1g11340	44.5402	0	4.56215	0	1	1
FvH4_1g11341	9.38762	2.06853	1.84793	1.11938	0.26298	0.388774
FvH4_1g11342	24.3655	-0.0539522	0.556361	-0.0969735	0.922747	0.962592
FvH4_1g11350	379.892	-0.396823	0.188697	-2.10297	0.0354682	0.0757226
FvH4_1g11390	412.729	-0.404858	4.56215	-0.0887427	0.929286	0.96616
FvH4_1g11391	105.882	0.693537	0.276301	2.51008	0.0120703	0.0303041
FvH4_1g11392	7.26222	-1.56897	0.893574	-1.75584	0.0791166	0.147344
FvH4_1g11400	173.943	-0.587338	0.256841	-2.28678	0.0222089	0.051142
FvH4_1g11410	926.683	0.820733	0.22643	3.62466	0.000289346	0.00113651
FvH4_1g11420	654.758	0.0787528	0.340733	0.231128	0.817216	0.893741
FvH4_1g11430	923.457	-0.527471	0.43918	-1.20103	0.229738	0.349706
FvH4_1g11470	85.6037	0.0615306	0.211998	0.290242	0.771631	0.859674
FvH4_1g11480	30.5865	-2.82684	0.892573	-3.16706	0.00153986	0.00501949
FvH4_1g11490	19.0567	-5.48545	1.10749	-4.95306	7.30556e-07	4.84805e-06
FvH4_1g11500	10.5807	-3.57292	1.49866	-2.38408	0.0171217	0.0410203
FvH4_1g11510	166.504	-0.477701	0.533	-0.896249	0.37012	0.504146
FvH4_1g11520	1487.66	0.58226	0.296155	1.96607	0.0492906	0.0998302
FvH4_1g11530	224.772	-3.69165	0.612406	-6.02811	1.65885e-09	1.68798e-08
FvH4_1g11540	196.919	0.755984	0.385367	1.96172	0.0497947	0.10069
FvH4_1g11550	1.17466	-1.29251	4.5247	-0.285656	0.775141	NA
FvH4_1g11570	223.094	-0.456316	0.310187	-1.4711	0.141264	0.237476
FvH4_1g11580	5.63239	-2.66852	1.62159	-1.64562	0.0998412	0.178727
FvH4_1g11590	3.28311	-3.38257	1.87539	-1.80366	0.0712849	0.135254
FvH4_1g11600	163.817	0.357184	0.66665	0.53579	0.592104	0.716503
FvH4_1g11610	11.6903	-1.58152	0.48151	-3.2845	0.00102163	0.00349167
FvH4_1g11620	889.506	1.15098	0.158631	7.25568	3.99642e-13	6.41357e-12
FvH4_1g11630	173.573	-1.74654	0.484592	-3.60415	0.000313172	0.0012194
FvH4_1g11640	508.05	-1.2835	0.508143	-2.52586	0.0115416	0.0291538
FvH4_1g11650	235.325	0.240276	0.43843	0.548038	0.583666	0.709051
FvH4_1g11660	83.5466	-0.52364	0.369959	-1.4154	0.156951	0.258011
FvH4_1g11690	255.684	3.37462	0.459038	7.35152	1.95969e-13	3.28413e-12
FvH4_1g11700	5.53146	-0.872641	0.673539	-1.2956	0.195112	0.307108
FvH4_1g11710	184.247	0.631797	0.329025	1.92021	0.0548317	0.109282
FvH4_1g11720	193.047	4.2716	0.677692	6.30315	2.91658e-10	3.30223e-09
FvH4_1g11721	604.953	0.511614	0.470096	1.08832	0.276455	0.404496
FvH4_1g11730	2349.48	-2.49344	0.315663	-7.89905	2.81042e-15	5.56929e-14
FvH4_1g11750	144.596	-0.313503	0.42381	-0.739725	0.459467	0.593547
FvH4_1g11760	298.84	1.80351	0.816568	2.20865	0.027199	0.0605654
FvH4_1g11761	55.0004	0.293538	0.406332	0.72241	0.470042	0.603835
FvH4_1g11770	73.5783	0.49626	0.266325	1.86336	0.0624113	0.121616
FvH4_1g11780	870.562	-0.935676	0.135752	-6.89256	5.47976e-12	7.70262e-11
FvH4_1g11800	1.48027	-0.40486	3.27352	-0.123677	0.901571	0.949205
FvH4_1g11810	2675.76	2.36126	0.402538	5.86594	4.46585e-09	4.27326e-08
FvH4_1g11830	26.5942	0	1.92772	0	1	1
FvH4_1g11840	7.58892	-3.80418	1.43817	-2.64515	0.0081654	0.0215843
FvH4_1g11850	21.5066	-3.54463	1.32787	-2.66941	0.00759853	0.02028
FvH4_1g11860	1580.82	1.83725	0.439725	4.17818	2.9385e-05	0.000144877
FvH4_1g11870	76.6474	7.09789	0.654523	10.8444	2.12094e-27	1.16929e-25
FvH4_1g11880	1.10799	4.76183	2.8653	1.6619	0.0965337	NA
FvH4_1g11900	56.0462	0.514377	0.256019	2.00914	0.0445225	0.0916582
FvH4_1g11910	15.4201	-3.45817	0.583702	-5.92454	3.13167e-09	3.06621e-08
FvH4_1g11920	412.595	0.112689	0.12236	0.920968	0.357067	0.489874
FvH4_1g11930	163.564	-0.831528	0.216531	-3.84024	0.000122916	0.000530475
FvH4_1g11960	693.288	0.559062	0.181629	3.07803	0.00208371	0.00655188
FvH4_1g11970	160.824	-0.121734	0.301454	-0.403822	0.686344	0.792029
FvH4_1g11971	4.77705	1.18409	0.973011	1.21694	0.223627	0.342319
FvH4_1g11980	45.6566	1.63221	0.484206	3.37089	0.000749247	0.00266494
FvH4_1g11990	80.734	0.372021	0.438798	0.847818	0.396539	0.531314
FvH4_1g12000	92.9869	-0.626739	0.346736	-1.80754	0.0706785	0.13427
FvH4_1g12010	446.109	-1.76851	0.51763	-3.41655	0.000634191	0.00229868
FvH4_1g12020	238.53	0.759366	0.352334	2.15525	0.0311426	0.0678554
FvH4_1g12030	970.423	-1.25906	0.59372	-2.12063	0.0339526	0.0729796
FvH4_1g12050	8.20804	-4.09295	1.37314	-2.98072	0.0028757	0.00872325
FvH4_1g12060	1434.49	-0.308373	0.470177	-0.655866	0.51191	0.642645
FvH4_1g12070	326.339	1.64338	0.823577	1.99542	0.0459974	0.0942442
FvH4_1g12090	128.311	-1.3631	0.775477	-1.75776	0.0787888	0.146873
FvH4_1g12100	45.5243	-0.0477983	0.287416	-0.166303	0.867918	0.928321
FvH4_1g12110	318.956	-2.88541	0.46808	-6.16436	7.07687e-10	7.61505e-09
FvH4_1g12120	857.469	0.523028	0.241919	2.16199	0.0306188	0.0669176
FvH4_1g12131	0.826514	2.77872	2.40155	1.15705	0.247251	NA
FvH4_1g12133	1.03008	3.60678	2.57024	1.40328	0.160532	NA
FvH4_1g12150	1.18889	-1.93037	1.82307	-1.05885	0.289667	NA
FvH4_1g12151	164.831	0.779202	0.260755	2.98826	0.00280573	0.00853496
FvH4_1g12160	788.187	0.6945	0.334641	2.07536	0.0379533	0.0800741
FvH4_1g12170	459.844	1.33449	0.477841	2.79274	0.00522642	0.0146682
FvH4_1g12180	242.321	2.07682	0.192408	10.7938	3.6813e-27	1.97879e-25
FvH4_1g12190	430.895	0.0602734	0.192261	0.313498	0.753903	0.84665
FvH4_1g12200	169.896	0.970258	0.215715	4.49787	6.8636e-06	3.84008e-05
FvH4_1g12210	130.998	0.883912	0.796192	1.11017	0.266924	0.393442
FvH4_1g12211	12.5352	-3.11514	1.68098	-1.85317	0.0638574	0.123839
FvH4_1g12220	233.677	-3.32928	0.643155	-5.17649	2.26101e-07	1.63463e-06
FvH4_1g12240	8.36537	-0.404861	2.10492	-0.192341	0.847475	0.914233
FvH4_1g12241	69.1914	-3.80987	0.747997	-5.09343	3.51634e-07	2.46672e-06
FvH4_1g12250	151.143	-0.202471	0.443432	-0.4566	0.647959	0.761507
FvH4_1g12260	3.13222	-2.43654	1.44836	-1.68228	0.0925153	0.168049
FvH4_1g12280	442.635	-0.610053	0.58117	-1.0497	0.293857	0.423048
FvH4_1g12300	409.025	0.0512679	0.238227	0.215206	0.829606	0.902518
FvH4_1g12310	147.799	-0.767064	0.403595	-1.90058	0.0573575	0.113402
FvH4_1g12320	215.607	0.195405	0.223026	0.876152	0.380947	0.51561
FvH4_1g12330	100.85	-0.884483	0.291388	-3.03541	0.00240205	0.00743972
FvH4_1g12340	1.80101	-2.58678	1.57388	-1.64358	0.100264	0.179334
FvH4_1g12350	569.603	-1.02232	0.726577	-1.40703	0.159418	0.261173
FvH4_1g12360	85.5326	-2.12651	0.537144	-3.95891	7.52917e-05	0.000340738
FvH4_1g12370	98.786	-0.500042	0.193438	-2.58502	0.00973731	0.0251214
FvH4_1g12390	1.33059	0.556933	2.52999	0.220132	0.825768	0.900073
FvH4_1g12391	174.984	-0.214741	0.173686	-1.23638	0.216319	0.333282
FvH4_1g12400	692.994	1.02918	0.366451	2.80852	0.004977	0.0140563
FvH4_1g12410	474.053	-0.598451	0.600274	-0.996962	0.318783	0.450113
FvH4_1g12420	429.888	-0.431544	0.435175	-0.991655	0.321366	0.452738
FvH4_1g12450	19.5052	10.0155	1.39856	7.16134	7.98906e-13	1.22783e-11
FvH4_1g12460	88.2368	0.131763	0.442277	0.29792	0.765764	0.855225
FvH4_1g12461	9.51678	0.435739	0.894426	0.487172	0.626137	0.74424
FvH4_1g12470	50.7322	-0.492509	0.321499	-1.53191	0.125544	0.215739
FvH4_1g12480	271.679	-0.382329	0.312348	-1.22405	0.220935	0.339187
FvH4_1g12490	13.8054	-4.4669	1.41762	-3.15098	0.00162723	0.00527468
FvH4_1g12510	85.0772	-0.894908	0.354769	-2.52251	0.011652	0.0293808
FvH4_1g12520	163.318	0.994158	0.589055	1.68772	0.0914655	0.166478
FvH4_1g12530	54.6424	-0.0838749	0.362358	-0.23147	0.81695	0.893587
FvH4_1g12531	51.5209	0.512572	0.24435	2.0977	0.035932	0.076538
FvH4_1g12540	18.3786	0.0793757	0.498382	0.159267	0.873459	0.931837
FvH4_1g12550	77.9119	0.608555	1.86671	0.326004	0.744421	0.839598
FvH4_1g12560	708.02	-8.16178	0.901946	-9.04908	1.44178e-19	4.11684e-18
FvH4_1g12580	14.0921	-0.512869	0.530037	-0.967609	0.333239	0.465198
FvH4_1g12582	531.467	-4.9952	0.804611	-6.20822	5.35893e-10	5.87691e-09
FvH4_1g12600	19.4774	0.240359	0.39851	0.603143	0.546413	0.674771
FvH4_1g12620	150.783	2.60731	0.460286	5.66454	1.47418e-08	1.29903e-07
FvH4_1g12630	763.599	0.773632	0.262379	2.94853	0.00319293	0.00955345
FvH4_1g12640	1.34299	-1.86319	3.1846	-0.585061	0.558507	0.686041
FvH4_1g12650	226.759	-0.822569	0.164102	-5.01253	5.37182e-07	3.66084e-06
FvH4_1g12651	1.88241	-0.638579	2.90246	-0.220013	0.825861	0.900101
FvH4_1g12660	250.529	-0.168293	0.39651	-0.424436	0.671248	0.779798
FvH4_1g12680	26.8309	-1.27269	0.76703	-1.65925	0.0970662	0.17469
FvH4_1g12690	296.821	3.5658	0.346964	10.2771	8.93411e-25	4.01028e-23
FvH4_1g12700	130.39	0.609409	0.642034	0.949184	0.342527	0.474987
FvH4_1g12710	62.2115	-0.0680658	0.419723	-0.162168	0.871173	0.930276
FvH4_1g12711	1.67335	1.31702	2.02236	0.651228	0.514899	0.645643
FvH4_1g12713	0.458067	1.39153	3.25048	0.4281	0.668578	NA
FvH4_1g12715	0.62931	-0.196961	2.15353	-0.0914599	0.927127	NA
FvH4_1g12716	243.182	-0.641731	0.286762	-2.23785	0.0252307	0.0569062
FvH4_1g12717	2.1036	-0.645095	1.4066	-0.458619	0.646508	0.760134
FvH4_1g12718	1.74532	-0.135217	1.81666	-0.0744317	0.940667	0.974571
FvH4_1g12719	1.20103	-1.9052	2.59328	-0.734667	0.462542	NA
FvH4_1g12720	61.908	-1.91048	0.525237	-3.63737	0.000275432	0.00108902
FvH4_1g12730	12.6802	0.326673	0.990395	0.329841	0.74152	0.837455
FvH4_1g12731	1.50214	3.59303	1.89677	1.89429	0.0581867	0.114788
FvH4_1g12740	36.289	-0.743543	0.610589	-1.21775	0.22332	0.34197
FvH4_1g12741	56.1686	-0.688127	0.607511	-1.1327	0.257341	0.382308
FvH4_1g12742	41.7509	-4.06215	1.3551	-2.99767	0.00272055	0.0082971
FvH4_1g12750	4.23138	-2.29239	3.49605	-0.655709	0.512011	0.642709
FvH4_1g12751	8.09358	-2.32918	0.871679	-2.67206	0.00753863	0.0201427
FvH4_1g12752	3.39296	-0.492056	1.01229	-0.48608	0.62691	0.744558
FvH4_1g12760	305.582	-2.07941	0.286592	-7.25566	3.99711e-13	6.41357e-12
FvH4_1g12761	64.9719	-4.45285	1.06524	-4.18012	2.91355e-05	0.000143865
FvH4_1g12770	34.1328	-3.73001	0.872808	-4.27357	1.92366e-05	9.83606e-05
FvH4_1g12780	16.5135	-2.80253	0.70511	-3.97459	7.04997e-05	0.000320778
FvH4_1g12781	2.57449	-2.84927	1.28728	-2.21341	0.0268694	0.0600114
FvH4_1g12790	33.4831	-0.719436	0.307549	-2.33925	0.0193223	0.0455137
FvH4_1g12800	9.92069	0.376988	0.608399	0.619639	0.535496	0.665147
FvH4_1g12820	48.0252	-0.621651	0.346116	-1.79608	0.0724818	0.137041
FvH4_1g12830	1.05094	2.57943	3.74095	0.689511	0.490502	NA
FvH4_1g12840	1.32169	0.521262	1.60004	0.32578	0.744591	0.839598
FvH4_1g12841	1.785	-0.404861	2.10242	-0.192569	0.847297	0.914086
FvH4_1g12850	2.90506	1.51873	2.46742	0.615511	0.538217	0.667656
FvH4_1g12860	2.64183	-1.47262	1.53117	-0.961767	0.336166	0.46819
FvH4_1g12870	5.6809	-3.19521	0.951445	-3.35827	0.00078432	0.00277089
FvH4_1g12880	102.607	-1.80118	0.260972	-6.90182	5.13412e-12	7.24336e-11
FvH4_1g12900	398.934	1.45238	0.234621	6.19031	6.00444e-10	6.53678e-09
FvH4_1g12901	184.129	-0.972763	0.730916	-1.33088	0.183228	0.291821
FvH4_1g12950	628.7	0.503553	0.316217	1.59243	0.111289	0.19522
FvH4_1g12970	3374.88	0.731708	0.541314	1.35172	0.176464	0.283124
FvH4_1g12980	439.547	0.200319	0.405141	0.494443	0.620993	0.739763
FvH4_1g12990	48.4306	-3.34401	0.586121	-5.70533	1.1612e-08	1.04072e-07
FvH4_1g13000	62.5653	-2.6381	0.587646	-4.48927	7.14683e-06	3.98817e-05
FvH4_1g13010	109.85	0.00745887	0.260245	0.0286609	0.977135	1
FvH4_1g13011	170.392	0.260305	0.409684	0.635379	0.525181	0.655631
FvH4_1g13030	232.109	-1.32916	0.530867	-2.50376	0.0122881	0.0307645
FvH4_1g13050	134.123	-0.334688	0.382016	-0.876111	0.38097	0.51561
FvH4_1g13060	18.0422	0.660906	0.629591	1.04974	0.293838	0.423048
FvH4_1g13070	536.968	-0.170934	0.276983	-0.617128	0.53715	0.666779
FvH4_1g13080	441.737	-1.67021	0.457802	-3.64833	0.000263952	0.00104844
FvH4_1g13090	95.2368	-1.61109	0.449152	-3.58695	0.000334564	0.00129376
FvH4_1g13110	36.644	-3.83156	0.625031	-6.1302	8.77714e-10	9.31937e-09
FvH4_1g13120	227.007	1.42719	0.264458	5.39664	6.78987e-08	5.36169e-07
FvH4_1g13160	1.18453	1.52469	2.73005	0.558482	0.576515	NA
FvH4_1g13170	75.188	-2.69853	0.91054	-2.96366	0.00304002	0.00915456
FvH4_1g13180	265.245	0.145845	0.262285	0.556054	0.578174	0.704251
FvH4_1g13190	5.08672	0	2.99635	0	1	1
FvH4_1g13192	7.18581	-0.0726368	1.02444	-0.0709041	0.943474	0.976492
FvH4_1g13200	200.059	-1.64835	0.520774	-3.16519	0.0015498	0.00504881
FvH4_1g13230	5.57156	-3.56898	1.48168	-2.40875	0.0160073	0.0387147
FvH4_1g13250	134.184	0.71209	0.250996	2.83705	0.00455319	0.013027
FvH4_1g13260	10.8917	-0.0908637	0.748017	-0.121473	0.903317	0.950485
FvH4_1g13270	37.4238	-0.401882	0.344323	-1.16716	0.243144	0.365641
FvH4_1g13290	151.863	-0.652646	0.527709	-1.23675	0.216179	0.333175
FvH4_1g13300	166.15	-0.363609	0.382636	-0.950276	0.341972	0.474371
FvH4_1g13310	16.4614	-0.889564	0.542415	-1.64001	0.101004	0.180431
FvH4_1g13311	370.807	1.7153	0.228813	7.49648	6.55546e-14	1.16103e-12
FvH4_1g13320	221.342	-0.54549	0.38492	-1.41715	0.156439	0.257253
FvH4_1g13330	568.451	-0.33513	0.399892	-0.838052	0.402002	0.536926
FvH4_1g13340	2.87148	0.130621	1.10799	0.11789	0.906155	0.952161
FvH4_1g13350	1714.2	-1.75734	0.390005	-4.50595	6.60781e-06	3.71035e-05
FvH4_1g13370	4048.24	-0.632713	0.507866	-1.24583	0.212828	0.329089
FvH4_1g13380	1087.07	2.15365	0.397282	5.42095	5.92835e-08	4.71745e-07
FvH4_1g13400	559.287	-1.02073	0.658154	-1.55089	0.120927	0.209159
FvH4_1g13410	3281.77	1.17729	0.349567	3.36787	0.000757519	0.00268769
FvH4_1g13420	118.199	-2.13692	1.0815	-1.9759	0.0481664	0.0979964
FvH4_1g13430	41.5173	-0.965818	0.355876	-2.71391	0.00664934	0.0180903
FvH4_1g13440	264.856	-3.36807	0.905174	-3.72091	0.000198509	0.00081298
FvH4_1g13450	1076.99	0.496193	0.202596	2.44917	0.0143185	0.0350881
FvH4_1g13460	2.94769	-0.404908	2.22433	-0.182036	0.855554	0.919764
FvH4_1g13470	324.228	1.76475	0.26213	6.73235	1.6694e-11	2.19668e-10
FvH4_1g13480	2.40953	5.09717	1.74502	2.92098	0.00348931	0.0103538
FvH4_1g13490	243.309	0.10055	0.409812	0.245357	0.80618	0.886316
FvH4_1g13491	4.9726	-1.0762	1.02705	-1.04786	0.294704	0.423899
FvH4_1g13510	113.015	-8.62114	1.24024	-6.95119	3.62224e-12	5.19212e-11
FvH4_1g13530	262.983	1.11516	0.278594	4.00283	6.25887e-05	0.000287301
FvH4_1g13540	293.157	-0.269433	0.408784	-0.659107	0.509827	0.64104
FvH4_1g13550	17.0342	6.22837	1.33506	4.66525	3.08246e-06	1.83641e-05
FvH4_1g13570	317.368	1.08963	0.202509	5.38066	7.42141e-08	5.80208e-07
FvH4_1g13610	545.07	0.676733	0.314176	2.15399	0.0312409	0.0680352
FvH4_1g13640	2.46301	-1.85035	2.81569	-0.657159	0.511079	0.642126
FvH4_1g13650	55.8746	1.03692	0.284757	3.64141	0.000271147	0.00107464
FvH4_1g13660	126.001	0.00158925	0.213981	0.00742709	0.994074	1
FvH4_1g13670	119.038	-2.12773	0.389882	-5.45738	4.83201e-08	3.90282e-07
FvH4_1g13680	837.436	0.125725	0.174029	0.722436	0.470026	0.603835
FvH4_1g13700	285.572	0.692322	0.182572	3.79205	0.000149411	0.000631261
FvH4_1g13710	378.49	-0.551891	0.628699	-0.877829	0.380036	0.514622
FvH4_1g13720	613.488	0.605639	0.265011	2.28534	0.0222931	0.0513084
FvH4_1g13730	2364.67	9.00731	0.997441	9.03042	1.71016e-19	4.84454e-18
FvH4_1g13740	356.996	3.87386	0.529335	7.31835	2.51037e-13	4.14239e-12
FvH4_1g13750	7.46034	0.760596	1.05709	0.719521	0.47182	0.605286
FvH4_1g13760	45.9754	-0.346604	0.510606	-0.67881	0.497258	0.628878
FvH4_1g13780	3.51169	-0.48507	1.78421	-0.271868	0.785723	0.870323
FvH4_1g13790	1.56321	-0.404859	4.19413	-0.0965297	0.9231	0.96282
FvH4_1g13800	1.90283	1.14087	1.86398	0.612064	0.540495	0.669399
FvH4_1g13810	2.66372	-1.36124	3.74714	-0.363275	0.716399	0.816501
FvH4_1g13820	13.5039	0.103646	0.711519	0.145669	0.884183	0.938528
FvH4_1g13850	1.23675	-2.3225	1.871	-1.24132	0.214489	NA
FvH4_1g13870	200.693	-0.292305	0.345308	-0.846504	0.397272	0.531964
FvH4_1g13880	407.893	-0.262338	0.336343	-0.779974	0.435406	0.570243
FvH4_1g13910	0.714066	4.81856	3.847	1.25255	0.21037	NA
FvH4_1g13911	5.55147	1.85674	0.804943	2.30667	0.021073	0.0489562
FvH4_1g13912	9.0622	1.96115	0.8442	2.32309	0.0201745	0.0472108
FvH4_1g13920	3.35909	3.07319	1.11277	2.76175	0.00574932	0.0159226
FvH4_1g13930	180.21	1.92283	1.06113	1.81207	0.0699757	0.133228
FvH4_1g13940	221.954	0.542771	0.480512	1.12957	0.258659	0.383678
FvH4_1g13950	515.003	-0.385182	0.256378	-1.5024	0.132994	0.226084
FvH4_1g13960	2624.94	-0.160748	0.385317	-0.417185	0.676543	0.783961
FvH4_1g13970	2003.5	2.29242	0.242626	9.44836	3.44193e-21	1.13505e-19
FvH4_1g13980	2037.3	0.924941	0.285037	3.24498	0.00117458	0.00393619
FvH4_1g13990	57.069	-0.306481	0.591396	-0.518234	0.604295	0.726842
FvH4_1g13991	1.14167	0.770206	1.9433	0.396339	0.691855	NA
FvH4_1g14000	53.4318	1.51646	0.454141	3.33919	0.000840234	0.00294376
FvH4_1g14010	1.61394	0.104993	1.51116	0.0694786	0.944609	0.9774
FvH4_1g14011	147.601	4.73221	0.496622	9.52878	1.59144e-21	5.38012e-20
FvH4_1g14013	30.6974	-2.9233	1.36155	-2.14704	0.0317901	0.0690731
FvH4_1g14040	728.811	-0.624419	0.28676	-2.1775	0.0294437	0.064764
FvH4_1g14050	123.608	2.15777	0.270852	7.96662	1.63073e-15	3.29223e-14
FvH4_1g14060	855.194	-0.292687	0.543348	-0.538674	0.590111	0.714877
FvH4_1g14070	418.201	-0.991057	0.279882	-3.54098	0.000398646	0.0015165
FvH4_1g14080	217.475	-0.39501	0.153639	-2.57103	0.0101396	0.0260282
FvH4_1g14090	356.263	0.0243215	0.594808	0.0408896	0.967384	0.993586
FvH4_1g14100	161.921	1.75997	0.734683	2.39555	0.0165953	0.0399347
FvH4_1g14110	244.355	0.612649	0.179404	3.41492	0.000638015	0.00231059
FvH4_1g14120	9.55258	-0.339646	1.77609	-0.191232	0.848344	0.914848
FvH4_1g14140	160.73	-3.84016	1.12372	-3.41736	0.000632326	0.00229269
FvH4_1g14150	39.8687	-0.114944	0.459497	-0.250151	0.80247	0.883548
FvH4_1g14170	110.405	-5.54278	0.874428	-6.33875	2.3163e-10	2.64908e-09
FvH4_1g14180	2.35859	-2.62099	1.36706	-1.91725	0.0552061	0.109926
FvH4_1g14181	24.0456	-2.60909	0.506601	-5.15019	2.60226e-07	1.86504e-06
FvH4_1g14190	45.3581	-2.05989	0.306324	-6.72456	1.7612e-11	2.30478e-10
FvH4_1g14220	0.523063	-3.45756	3.18458	-1.08572	0.277603	NA
FvH4_1g14230	0.813213	-2.48637	2.29136	-1.08511	0.277875	NA
FvH4_1g14240	7.14469	-0.888156	0.876667	-1.01311	0.31101	0.441679
FvH4_1g14250	38.4624	-0.839311	0.347239	-2.4171	0.0156448	0.0379318
FvH4_1g14251	5.38532	-1.72229	0.819855	-2.10072	0.0356654	0.0760604
FvH4_1g14252	8.64005	-0.959725	0.548864	-1.74857	0.080366	0.149343
FvH4_1g14280	2.43421	-1.19739	1.03034	-1.16213	0.245181	0.367925
FvH4_1g14300	2.25264	2.71321	1.657	1.63743	0.101541	0.181121
FvH4_1g14310	513.555	-0.5844	0.354371	-1.64912	0.0991231	0.177604
FvH4_1g14320	344.801	-4.38215	0.586525	-7.47137	7.93637e-14	1.39071e-12
FvH4_1g14330	372.483	-1.31091	0.218488	-5.99992	1.97419e-09	1.98629e-08
FvH4_1g14350	357.445	0.131772	0.278124	0.473791	0.635649	0.751807
FvH4_1g14360	26.3112	-5.24568	1.53735	-3.41216	0.000644507	0.00233174
FvH4_1g14390	12.1129	-2.18721	0.865566	-2.52691	0.0115071	0.0290802
FvH4_1g14400	111.934	-3.69342	0.986116	-3.74542	0.000180095	0.000744658
FvH4_1g14410	6.38997	-0.0260504	0.623128	-0.0418057	0.966654	0.993025
FvH4_1g14420	172.165	0.259372	0.431199	0.601514	0.547498	0.675877
FvH4_1g14430	6650.11	-8.82723	0.559179	-15.7861	3.88075e-56	9.22567e-54
FvH4_1g14460	67.0546	-2.23088	0.714423	-3.12263	0.00179242	0.0057452
FvH4_1g14470	143.658	-0.506559	0.355401	-1.42532	0.154066	0.254168
FvH4_1g14490	259.694	0.505444	0.189126	2.67252	0.0075283	0.0201226
FvH4_1g14510	208.729	-7.0408	1.18717	-5.93074	3.01568e-09	2.96073e-08
FvH4_1g14520	115.256	-1.67761	0.378046	-4.43758	9.09768e-06	4.98114e-05
FvH4_1g14540	134.15	0.654293	0.30776	2.12598	0.0335048	0.0722192
FvH4_1g14550	224.072	0.205808	0.531651	0.387112	0.698673	0.802203
FvH4_1g14560	21.9004	-3.99316	1.22454	-3.26094	0.00111042	0.00374571
FvH4_1g14572	63.8868	-1.44235	0.334819	-4.30786	1.64843e-05	8.55695e-05
FvH4_1g14580	430.977	1.22266	0.25206	4.85067	1.23043e-06	7.81782e-06
FvH4_1g14590	435.636	-0.125104	0.179268	-0.697857	0.485266	0.617453
FvH4_1g14600	48.3554	0.261654	0.485802	0.538602	0.590162	0.714877
FvH4_1g14610	100.972	-0.380175	0.217345	-1.74918	0.0802602	0.149177
FvH4_1g14620	121.883	-1.39801	1.07519	-1.30024	0.193518	0.304957
FvH4_1g14630	4.48302	-4.0538	1.2402	-3.26866	0.00108058	0.00366184
FvH4_1g14640	97.164	-0.313292	0.343381	-0.912375	0.361571	0.494758
FvH4_1g14650	7.83992	-1.74521	0.627175	-2.78266	0.00539159	0.0150674
FvH4_1g14660	15.5052	-4.81675	0.724911	-6.6446	3.04039e-11	3.8386e-10
FvH4_1g14670	5.63759	0.0507559	1.61768	0.0313757	0.97497	0.998973
FvH4_1g14700	1.34952	-1.81422	1.57818	-1.14957	0.250321	0.374098
FvH4_1g14710	44.3944	-7.24005	0.831088	-8.71153	2.9981e-18	7.61964e-17
FvH4_1g14721	27.7	0.255992	0.301481	0.849115	0.395817	0.530644
FvH4_1g14740	27.2448	1.36162	0.327033	4.16354	3.13345e-05	0.000153328
FvH4_1g14760	226.812	0.0902446	0.264698	0.340935	0.733153	0.830075
FvH4_1g14770	13.079	-3.97793	1.3509	-2.94465	0.00323319	0.00966033
FvH4_1g14780	8.9654	1.92909	1.09528	1.76127	0.0781932	0.145966
FvH4_1g14790	3.73654	-5.2496	1.59107	-3.29942	0.000968836	0.00333295
FvH4_1g14800	20.8548	-1.90816	0.411809	-4.6336	3.59356e-06	2.11454e-05
FvH4_1g14810	119.944	0.915147	0.525038	1.74301	0.0813319	0.150921
FvH4_1g14820	12.5265	-4.09123	1.1958	-3.42133	0.000623167	0.00226483
FvH4_1g14840	7.31679	-0.674725	0.749013	-0.900818	0.367685	0.501592
FvH4_1g14850	34.9077	-0.115548	0.309808	-0.372966	0.709174	0.810564
FvH4_1g14860	40.6814	-6.19077	0.972549	-6.36551	1.94646e-10	2.24401e-09
FvH4_1g14871	1.54719	4.42157	2.36801	1.86721	0.0618727	0.120807
FvH4_1g14880	6.36172	-1.92365	1.45406	-1.32296	0.185849	0.295165
FvH4_1g14881	3.18991	-1.88544	1.68022	-1.12214	0.261803	0.387342
FvH4_1g14890	35.7836	-2.4375	0.482441	-5.05242	4.36248e-07	3.01794e-06
FvH4_1g14891	1.06861	0	2.9858	0	1	NA
FvH4_1g14901	1.43049	-0.148422	1.87213	-0.0792799	0.93681	0.971934
FvH4_1g14930	1.36054	1.38666	2.77747	0.499252	0.617602	0.737111
FvH4_1g14940	5.22575	-4.09609	1.60984	-2.5444	0.0109465	0.027815
FvH4_1g14950	2.11646	-0.938185	1.90586	-0.492263	0.622533	0.741023
FvH4_1g14960	550.416	0.437839	0.724009	0.604743	0.54535	0.673922
FvH4_1g14970	35.0073	-3.97594	0.995365	-3.99445	6.48447e-05	0.000297086
FvH4_1g14990	94.2424	-3.40981	0.364581	-9.35266	8.54708e-21	2.71449e-19
FvH4_1g15000	10.621	-0.473256	2.18826	-0.21627	0.828777	0.901981
FvH4_1g15011	0.743072	-1.27299	3.21838	-0.395537	0.692447	NA
FvH4_1g15020	73.4899	-1.79957	0.320856	-5.60864	2.03919e-08	1.7573e-07
FvH4_1g15050	7.58216	0.0624962	0.620359	0.100742	0.919755	0.960683
FvH4_1g15070	7.18468	-3.98577	0.953388	-4.18063	2.90699e-05	0.000143652
FvH4_1g15080	13.3914	-0.002764	0.450837	-0.00613082	0.995108	1
FvH4_1g15090	41.9305	-5.5971	0.835082	-6.70246	2.04942e-11	2.65769e-10
FvH4_1g15102	15.1737	-0.908711	0.698464	-1.30101	0.193254	0.304608
FvH4_1g15120	200.267	0.282759	0.39368	0.718246	0.472606	0.605969
FvH4_1g15130	342.823	-0.00966538	0.243989	-0.0396139	0.968401	0.99436
FvH4_1g15140	2.14148	-0.402073	1.73824	-0.23131	0.817074	0.893645
FvH4_1g15150	1.40134	-2.61328	1.91037	-1.36795	0.171328	0.276391
FvH4_1g15160	196.99	-0.579422	0.268001	-2.16202	0.030617	0.0669176
FvH4_1g15170	0.896411	0.188362	2.22152	0.0847897	0.932429	NA
FvH4_1g15171	71.2532	-2.17044	0.385565	-5.62925	1.80996e-08	1.57046e-07
FvH4_1g15180	1.41838	0.146213	1.60535	0.0910784	0.92743	0.965557
FvH4_1g15200	35.356	-1.56972	0.405063	-3.87526	0.000106513	0.000466802
FvH4_1g15210	766.315	1.21698	0.372985	3.26281	0.00110314	0.00372406
FvH4_1g15220	2139.84	3.22787	0.324904	9.93481	2.93727e-23	1.13997e-21
FvH4_1g15230	2.23173	0.0428338	1.4386	0.0297746	0.976247	1
FvH4_1g15240	94.7926	0.691061	0.445762	1.55029	0.121071	0.209358
FvH4_1g15260	30.0337	-3.61913	1.51189	-2.39377	0.016676	0.0400885
FvH4_1g15270	3.5098	2.67533	1.65845	1.61315	0.106712	0.188593
FvH4_1g15330	397.668	0.391763	0.356448	1.09907	0.271736	0.399002
FvH4_1g15350	0.848645	-0.924534	2.64419	-0.349648	0.726603	NA
FvH4_1g15351	25.6191	1.98453	0.441621	4.49373	6.9985e-06	3.90945e-05
FvH4_1g15380	116.758	-1.16393	0.559742	-2.07941	0.0375797	0.079387
FvH4_1g15390	86.0772	-0.926115	0.415078	-2.23118	0.0256691	0.0577614
FvH4_1g15400	6.95986	-1.02005	0.610141	-1.67183	0.0945573	0.170986
FvH4_1g15410	90.3194	-1.20277	0.214761	-5.6005	2.13736e-08	1.83601e-07
FvH4_1g15420	9.88608	0.514208	0.638449	0.805402	0.420588	0.555334
FvH4_1g15430	3.80531	-1.67713	1.93239	-0.867908	0.385445	0.519859
FvH4_1g15440	720.013	-0.577132	0.421578	-1.36898	0.171006	0.275955
FvH4_1g15470	14.2715	-1.79812	1.16331	-1.54569	0.12218	0.210986
FvH4_1g15480	122.018	1.65487	0.494189	3.34865	0.000812063	0.0028553
FvH4_1g15500	38.2005	-0.807647	0.553148	-1.46009	0.144265	0.241407
FvH4_1g15510	7.31941	0.245171	1.70049	0.144176	0.885361	0.939212
FvH4_1g15520	210.928	0.17174	0.18699	0.918446	0.358385	0.491364
FvH4_1g15530	257.239	8.1586	0.631806	12.9131	3.79555e-38	3.81346e-36
FvH4_1g15540	60.6591	0.606777	0.457626	1.32592	0.184866	0.293755
FvH4_1g15560	112.722	0.292577	0.361035	0.810383	0.41772	0.552406
FvH4_1g15570	1.86247	1.57177	1.09386	1.4369	0.150746	0.249956
FvH4_1g15580	4.41307	-2.07232	1.49402	-1.38708	0.165418	0.268853
FvH4_1g15590	48.3732	0.415601	0.995135	0.417632	0.676216	0.783664
FvH4_1g15610	191.893	-0.780839	0.303496	-2.57282	0.0100875	0.025916
FvH4_1g15620	839.519	0.55791	0.198891	2.8051	0.00503016	0.0141859
FvH4_1g15630	82.9478	0.378888	0.241079	1.57163	0.116036	0.202342
FvH4_1g15670	82.9081	1.23979	0.384134	3.22749	0.00124883	0.00416101
FvH4_1g15680	91.4031	-4.53432	0.403031	-11.2505	2.30183e-29	1.40203e-27
FvH4_1g15690	905.118	0.820049	0.478628	1.71334	0.0866509	0.159197
FvH4_1g15700	126.247	-6.03219	1.05539	-5.71558	1.09332e-08	9.844e-08
FvH4_1g15710	183.78	0.983259	0.326129	3.01494	0.00257033	0.00789044
FvH4_1g15720	3.61641	-4.04156	1.54849	-2.60999	0.00905443	0.0236175
FvH4_1g15750	1.2936	-2.99787	2.53409	-1.18302	0.236803	0.358379
FvH4_1g15770	83.6341	-1.61684	0.238433	-6.78113	1.19243e-11	1.60743e-10
FvH4_1g15790	116.905	0.719449	0.395863	1.81742	0.0691529	0.131907
FvH4_1g15810	170.5	0.333305	0.438094	0.760808	0.446771	0.581409
FvH4_1g15820	253.555	-2.06924	0.313181	-6.60715	3.91782e-11	4.88613e-10
FvH4_1g15830	21.0491	5.08131	1.89931	2.67535	0.0074652	0.0199894
FvH4_1g15840	46.7773	-5.3044	0.660403	-8.03207	9.58394e-16	1.96814e-14
FvH4_1g15860	58.1569	5.62526	0.584445	9.62496	6.27316e-22	2.22206e-20
FvH4_1g15870	101.315	-0.700527	0.246468	-2.84226	0.00447944	0.01284
FvH4_1g15880	86.123	-1.21092	0.208349	-5.81198	6.17365e-09	5.78134e-08
FvH4_1g15890	40.424	-0.552689	0.411263	-1.34388	0.178986	0.286317
FvH4_1g15900	2.23159	-2.54592	1.3838	-1.8398	0.0657972	0.126811
FvH4_1g15910	88.4877	-1.26007	0.370431	-3.40162	0.000669866	0.00241365
FvH4_1g15920	88.3152	-0.00620264	0.441151	-0.0140601	0.988782	1
FvH4_1g15930	112.33	1.42735	0.846177	1.68682	0.0916372	0.166691
FvH4_1g15940	45.117	8.12754	1.79045	4.53937	5.64214e-06	3.20083e-05
FvH4_1g15950	106.174	0.356818	0.179169	1.99152	0.0464242	0.0950092
FvH4_1g15970	6.30841	-0.568953	0.702255	-0.810181	0.417836	0.552481
FvH4_1g15980	719.491	-0.607701	0.330804	-1.83704	0.0662037	0.127446
FvH4_1g15990	3.482	2.39572	0.982449	2.43852	0.0147474	0.036
FvH4_1g16000	1.63437	-0.704849	1.40042	-0.503313	0.614744	0.734843
FvH4_1g16010	103.232	-0.405785	0.582755	-0.696322	0.486227	0.618383
FvH4_1g16020	75.7802	-0.379213	0.626905	-0.604896	0.545248	0.673835
FvH4_1g16030	250.179	0.472754	0.395206	1.19622	0.231609	0.351857
FvH4_1g16050	243.63	0.366082	0.489886	0.747279	0.454895	0.589234
FvH4_1g16060	588.783	0.442151	0.384166	1.15094	0.249758	0.373439
FvH4_1g16070	29.8619	-2.39931	0.733244	-3.27218	0.00106721	0.00362383
FvH4_1g16080	403.654	1.2074	0.395926	3.04957	0.00229172	0.007135
FvH4_1g16081	1.3323	4.34282	1.85888	2.33626	0.0194778	0.0458298
FvH4_1g16090	30.2461	-0.78178	1.30969	-0.596918	0.550562	0.679036
FvH4_1g16100	388.54	0.159781	0.212013	0.75364	0.451066	0.585473
FvH4_1g16102	2.19954	0	4.56215	0	1	1
FvH4_1g16103	42.0202	-9.54033	1.22142	-7.81088	5.679e-15	1.09314e-13
FvH4_1g16104	30.469	-6.34536	1.08438	-5.85158	4.86927e-09	4.63248e-08
FvH4_1g16130	10.7888	3.19764	0.839784	3.80769	0.000140271	0.00059734
FvH4_1g16140	194.724	-3.65145	0.342245	-10.6691	1.42003e-26	7.33943e-25
FvH4_1g16150	64.748	-6.1714	0.674241	-9.15311	5.53183e-20	1.64965e-18
FvH4_1g16160	2.02696	0.0823407	1.08628	0.0758006	0.939578	0.973708
FvH4_1g16170	41.2675	-1.39125	0.342643	-4.06035	4.89983e-05	0.000229624
FvH4_1g16171	9.1819	-4.15588	1.38184	-3.0075	0.00263409	0.00806513
FvH4_1g16180	12.0759	-0.0459065	1.25284	-0.0366419	0.970771	0.99616
FvH4_1g16200	168.356	-0.290296	0.485084	-0.598444	0.549544	0.677858
FvH4_1g16210	166.259	-6.25999	0.729975	-8.57562	9.85521e-18	2.41891e-16
FvH4_1g16211	94.5355	-1.88087	0.220457	-8.53167	1.44247e-17	3.48478e-16
FvH4_1g16212	679.993	1.29405	0.386874	3.34488	0.000823181	0.0028892
FvH4_1g16230	543.259	1.54854	0.684217	2.26323	0.0236216	0.0538359
FvH4_1g16240	595.736	-0.492933	0.454688	-1.08411	0.278315	0.406608
FvH4_1g16250	309.774	-0.24662	0.202178	-1.21981	0.222536	0.341061
FvH4_1g16260	80.8585	0.0517908	0.259537	0.199551	0.841832	0.910467
FvH4_1g16271	1.18066	0	4.56215	0	1	NA
FvH4_1g16300	1.04684	0	4.56215	0	1	NA
FvH4_1g16301	13.2759	-5.30187	0.875286	-6.0573	1.38422e-09	1.42402e-08
FvH4_1g16302	18.6164	-0.559476	0.442967	-1.26302	0.206582	0.321631
FvH4_1g16303	39.7157	-0.687831	0.435296	-1.58015	0.114073	0.199309
FvH4_1g16304	3.27058	1.38258	1.14373	1.20884	0.226726	0.346101
FvH4_1g16320	4.56617	0.649564	0.719771	0.90246	0.366813	0.500529
FvH4_1g16321	31.9368	-3.41958	1.30782	-2.61472	0.00893001	0.0233383
FvH4_1g16330	153.043	-3.58077	0.48799	-7.33781	2.17119e-13	3.60484e-12
FvH4_1g16340	740.238	2.87741	0.469146	6.1333	8.60756e-10	9.15288e-09
FvH4_1g16350	732.789	0.27639	0.500829	0.551866	0.58104	0.706934
FvH4_1g16360	217.643	0.835235	0.210991	3.95864	7.53782e-05	0.000341058
FvH4_1g16370	103.531	3.08462	0.390554	7.89807	2.83262e-15	5.59781e-14
FvH4_1g16380	126.255	0.129427	0.194816	0.664354	0.506464	0.637961
FvH4_1g16390	1548.43	-0.732033	0.236899	-3.09006	0.00200113	0.00633484
FvH4_1g16400	45.2902	-1.9677	0.419984	-4.68518	2.7972e-06	1.67996e-05
FvH4_1g16410	55.2032	-3.84311	0.854088	-4.49967	6.80601e-06	3.80984e-05
FvH4_1g16440	53.4071	-2.41604	0.498104	-4.85048	1.23163e-06	7.82312e-06
FvH4_1g16460	193.282	0.174714	0.602635	0.289917	0.77188	0.859817
FvH4_1g16470	123.689	-0.744571	0.228801	-3.25423	0.00113699	0.00382813
FvH4_1g16480	221.627	-1.04763	0.565021	-1.85415	0.063718	0.123635
FvH4_1g16500	342.016	0.7065	0.367659	1.92162	0.0546539	0.108981
FvH4_1g16511	8.40986	1.88937	0.590931	3.19729	0.00138727	0.00457551
FvH4_1g16530	7715.48	1.08648	0.393166	2.76341	0.00572013	0.0158531
FvH4_1g16560	13.7321	2.51177	0.610685	4.11304	3.90483e-05	0.000187155
FvH4_1g16570	348.051	-0.199416	0.299492	-0.665847	0.505509	0.637033
FvH4_1g16580	224.392	-0.431661	0.540562	-0.798541	0.424556	0.559303
FvH4_1g16590	83.2076	0.307263	0.244065	1.25894	0.208053	0.323266
FvH4_1g16600	20.1227	-0.563197	0.448322	-1.25623	0.209031	0.324481
FvH4_1g16610	12.7458	-1.84737	1.03466	-1.78549	0.0741822	0.139605
FvH4_1g16620	148.777	-0.681612	0.597644	-1.1405	0.254079	0.378662
FvH4_1g16621	12.1292	0.193118	0.498924	0.387069	0.698705	0.802203
FvH4_1g16630	112.89	0.583979	0.421753	1.38465	0.16616	0.269774
FvH4_1g16640	537.445	0.534359	0.33321	1.60367	0.108786	0.191675
FvH4_1g16650	41.7952	-1.06383	0.464843	-2.28858	0.022104	0.0509442
FvH4_1g16660	189.758	1.86743	0.258434	7.22595	4.97609e-13	7.82669e-12
FvH4_1g16680	28.7421	0.0164722	0.80665	0.0204206	0.983708	1
FvH4_1g16700	26.0037	-3.30249	0.489336	-6.74891	1.48957e-11	1.97943e-10
FvH4_1g16740	9.0788	-0.306083	0.648337	-0.472104	0.636853	0.752444
FvH4_1g16750	159.694	-0.983395	0.583652	-1.6849	0.0920076	0.167238
FvH4_1g16760	68.4099	-0.994739	0.485117	-2.05051	0.0403144	0.0842125
FvH4_1g16770	566.802	-1.70218	0.393587	-4.32478	1.52682e-05	7.99709e-05
FvH4_1g16780	285.678	0.203547	0.470847	0.432301	0.665523	0.775157
FvH4_1g16790	6.76828	-4.3699	1.23216	-3.54654	0.000390328	0.00148829
FvH4_1g16800	299.677	-0.330189	0.260701	-1.26654	0.205319	0.320058
FvH4_1g16840	71.7075	-3.29005	1.42127	-2.31486	0.0206204	0.0480682
FvH4_1g16841	0.384076	-2.3314	3.39756	-0.686198	0.492589	NA
FvH4_1g16860	58.1412	-6.32134	0.915601	-6.90404	5.05455e-12	7.13577e-11
FvH4_1g16861	191.615	-4.30283	0.39998	-10.7576	5.45659e-27	2.88971e-25
FvH4_1g16862	7.56675	-4.11192	1.55232	-2.64889	0.00807577	0.0213655
FvH4_1g16870	27.437	0.80125	1.0761	0.744585	0.456523	0.590631
FvH4_1g16871	48.7296	0.228364	0.453137	0.503962	0.614288	0.734584
FvH4_1g16890	50.7329	0.153666	0.357594	0.429723	0.667397	0.776541
FvH4_1g16891	9.13951	0.209596	0.946306	0.221488	0.824712	0.899378
FvH4_1g16910	313.05	-0.783401	0.297115	-2.63669	0.00837185	0.0220435
FvH4_1g16930	75.0056	3.51957	0.552537	6.36983	1.89233e-10	2.18512e-09
FvH4_1g16940	518.49	0.69043	0.3671	1.88077	0.0600034	0.117745
FvH4_1g16950	15.2803	0.275905	0.499896	0.551925	0.581	0.706925
FvH4_1g16960	138.773	-0.519887	0.253659	-2.04955	0.0404082	0.0843675
FvH4_1g16970	27.3209	-3.31193	0.769273	-4.30527	1.66784e-05	8.64725e-05
FvH4_1g16980	6.42435	-6.46479	1.36919	-4.72161	2.33982e-06	1.42436e-05
FvH4_1g16990	57.0233	-1.73022	0.339345	-5.0987	3.41997e-07	2.40225e-06
FvH4_1g17000	687.922	0.0376358	0.366891	0.10258	0.918296	0.959877
FvH4_1g17020	5.45125	-3.09573	1.63376	-1.89484	0.0581132	0.114664
FvH4_1g17030	81.6125	0.736839	0.258295	2.85271	0.00433488	0.0124821
FvH4_1g17040	155.847	0.951083	0.218793	4.34696	1.3804e-05	7.28199e-05
FvH4_1g17050	390.389	0.666464	0.16498	4.03967	5.35266e-05	0.000249269
FvH4_1g17060	240.886	-2.04572	0.243073	-8.41609	3.89272e-17	9.02883e-16
FvH4_1g17080	570.432	-4.48944	0.932187	-4.81603	1.46445e-06	9.18796e-06
FvH4_1g17100	503.602	0.650756	0.233357	2.78867	0.00529246	0.0148265
FvH4_1g17110	553.795	-2.97133	0.250517	-11.8608	1.8919e-32	1.38832e-30
FvH4_1g17120	148.574	-0.63064	0.370748	-1.70099	0.0889441	0.162801
FvH4_1g17130	27.585	-3.12762	1.15403	-2.71018	0.00672462	0.0182673
FvH4_1g17140	356.91	-1.79994	0.376033	-4.78665	1.69591e-06	1.05174e-05
FvH4_1g17150	825.929	-2.39123	0.736829	-3.2453	0.00117327	0.00393242
FvH4_1g17190	124.428	-0.000750839	0.289647	-0.00259226	0.997932	1
FvH4_1g17200	111.283	-1.13139	0.325125	-3.47986	0.00050167	0.00186681
FvH4_1g17210	10.564	-2.97385	0.773439	-3.84497	0.000120566	0.00052142
FvH4_1g17220	163.966	-0.412508	0.242717	-1.69955	0.0892165	0.163167
FvH4_1g17230	393.058	-0.661045	0.188752	-3.5022	0.00046144	0.00172877
FvH4_1g17240	3446.66	-0.977664	0.518947	-1.88394	0.0595735	0.117016
FvH4_1g17250	1414.11	-0.0327635	0.170599	-0.19205	0.847703	0.914386
FvH4_1g17270	308.31	-0.273101	0.395674	-0.690217	0.490057	0.622003
FvH4_1g17280	477.134	-7.52054	0.487374	-15.4307	1.01701e-53	2.10257e-51
FvH4_1g17290	105.162	-7.69228	1.30578	-5.89093	3.84031e-09	3.7077e-08
FvH4_1g17340	98.4808	-1.74719	0.565377	-3.0903	0.00199952	0.00633069
FvH4_1g17350	25.3502	-1.07344	0.54325	-1.97595	0.0481599	0.0979925
FvH4_1g17370	8.08181	0	4.56215	0	1	1
FvH4_1g17380	961.852	-2.85161	0.302545	-9.42542	4.28385e-21	1.3998e-19
FvH4_1g17390	1950.45	-4.76241	0.37164	-12.8146	1.35887e-37	1.31609e-35
FvH4_1g17400	56.6638	-0.262415	0.282223	-0.929812	0.352468	0.484895
FvH4_1g17410	612.363	0.822772	0.25798	3.18928	0.00142626	0.00468751
FvH4_1g17420	4.02464	0	4.32153	0	1	1
FvH4_1g17440	178.884	-1.61291	0.354152	-4.55429	5.25622e-06	2.99931e-05
FvH4_1g17450	80.5018	-0.219338	0.643455	-0.340875	0.733197	0.830075
FvH4_1g17460	1.84976	0	4.56215	0	1	1
FvH4_1g17470	54.7565	-1.71339	0.283469	-6.04436	1.50003e-09	1.53435e-08
FvH4_1g17480	118.477	-0.449431	0.273815	-1.64137	0.100721	0.179986
FvH4_1g17490	42.7729	-1.14366	0.715299	-1.59885	0.109853	0.19324
FvH4_1g17500	438.47	0.964134	0.558718	1.72562	0.0844159	0.155649
FvH4_1g17510	148.023	-0.511945	0.494673	-1.03492	0.300708	0.430318
FvH4_1g17530	44.5736	-3.13739	0.649368	-4.83145	1.35539e-06	8.55977e-06
FvH4_1g17540	84.0331	-0.418315	0.186663	-2.24102	0.0250251	0.0565139
FvH4_1g17550	14.9215	-4.07211	0.7008	-5.81066	6.22273e-09	5.8197e-08
FvH4_1g17560	148.767	0.900183	0.395172	2.27795	0.0227294	0.0521509
FvH4_1g17570	245.799	-0.620692	0.208848	-2.97198	0.00295882	0.00894761
FvH4_1g17580	12.0632	-0.386722	0.535549	-0.722105	0.47023	0.603896
FvH4_1g17590	486.445	0.445351	0.311965	1.42757	0.153416	0.253328
FvH4_1g17610	294.867	0.76336	0.280527	2.72117	0.00650521	0.0177408
FvH4_1g17620	1095.64	3.68222	0.568783	6.47387	9.55268e-11	1.14873e-09
FvH4_1g17630	1772.68	0.844536	0.311222	2.71361	0.00665545	0.0181046
FvH4_1g17640	1329	-0.830565	0.436015	-1.9049	0.0567932	0.112441
FvH4_1g17650	23.7903	-3.9193	0.890287	-4.40229	1.07115e-05	5.79102e-05
FvH4_1g17651	0.822671	-1.92472	2.52794	-0.761381	0.44643	NA
FvH4_1g17660	135.579	-1.1506	0.35025	-3.28509	0.00101951	0.00348664
FvH4_1g17670	55.369	-0.609692	0.384027	-1.58763	0.11237	0.1967
FvH4_1g17680	245.988	0.549415	0.170843	3.2159	0.00130034	0.00431526
FvH4_1g17690	55.8826	-4.35097	0.684542	-6.35603	2.07034e-10	2.37918e-09
FvH4_1g17710	561.261	0.784255	0.19189	4.087	4.36982e-05	0.000206905
FvH4_1g17720	164.015	1.20096	0.452926	2.65156	0.0080121	0.0212257
FvH4_1g17740	105.056	0.330596	0.301821	1.09534	0.273368	0.40077
FvH4_1g17750	4.93578	-2.55674	1.01762	-2.51248	0.0119887	0.0301202
FvH4_1g17760	575.454	-1.04319	0.630709	-1.65399	0.0981299	0.176221
FvH4_1g17780	109.909	0.326883	0.435508	0.750578	0.452907	0.587366
FvH4_1g17790	352.748	-0.257834	0.158953	-1.62208	0.104787	0.185893
FvH4_1g17800	660.543	-0.945822	0.257925	-3.66705	0.000245365	0.000983886
FvH4_1g17810	0.892188	0.232086	2.25621	0.102865	0.91807	NA
FvH4_1g17820	298.349	-1.05912	0.241872	-4.37884	1.19315e-05	6.38632e-05
FvH4_1g17821	1.86154	-1.67893	1.44503	-1.16186	0.245291	0.36804
FvH4_1g17830	6.80223	-1.24299	0.695987	-1.78594	0.0741084	0.139479
FvH4_1g17840	1321.19	1.88937	0.181577	10.4053	2.34512e-25	1.11801e-23
FvH4_1g17850	515.085	1.08397	0.257895	4.20314	2.63237e-05	0.000130803
FvH4_1g17860	18.406	-0.6201	0.376508	-1.64698	0.0995622	0.178257
FvH4_1g17861	6.07517	0.33047	0.82065	0.402693	0.687174	0.792689
FvH4_1g17880	2.44312	-1.43036	1.07578	-1.32959	0.183652	0.292367
FvH4_1g17890	15.7126	-2.36292	0.4784	-4.93922	7.8435e-07	5.17148e-06
FvH4_1g17891	54.3486	-2.28628	0.644297	-3.54848	0.000387457	0.00147818
FvH4_1g17910	1286.45	1.83153	0.751557	2.43698	0.0148103	0.0361285
FvH4_1g17920	543.12	0.803867	0.116077	6.92531	4.35015e-12	6.18601e-11
FvH4_1g17941	430.314	-1.59783	0.322371	-4.95649	7.17791e-07	4.77218e-06
FvH4_1g17950	23.2123	-0.264384	0.332263	-0.795708	0.426202	0.560955
FvH4_1g17951	5.90114	6.20449	1.35215	4.58861	4.46202e-06	2.57828e-05
FvH4_1g17953	11.9793	3.81037	0.768485	4.95828	7.11194e-07	4.73564e-06
FvH4_1g17970	204.604	-0.230966	0.248712	-0.928646	0.353072	0.485508
FvH4_1g17980	49.5765	1.44447	0.400074	3.6105	0.000305611	0.00119342
FvH4_1g18010	89.8193	-1.64867	0.190702	-8.64524	5.3694e-18	1.34241e-16
FvH4_1g18020	12.61	-4.40098	1.06164	-4.14547	3.39117e-05	0.000164442
FvH4_1g18030	52.8253	-0.585301	0.326563	-1.79231	0.0730833	0.137991
FvH4_1g18040	0.874187	-2.86857	2.13097	-1.34613	0.17826	NA
FvH4_1g18060	459.04	-0.018155	0.431504	-0.0420738	0.96644	0.992853
FvH4_1g18070	1133.32	6.28661	0.470264	13.3682	9.2708e-41	1.06027e-38
FvH4_1g18080	384.783	3.30426	0.257063	12.8539	8.17942e-38	8.0304e-36
FvH4_1g18090	49.447	-1.93821	0.448477	-4.32176	1.54788e-05	8.10347e-05
FvH4_1g18100	6.84209	1.13704	1.05957	1.07311	0.28322	0.411482
FvH4_1g18110	2.94103	-4.95206	1.50411	-3.29236	0.000993502	0.00340962
FvH4_1g18111	6.43581	0.43109	0.821196	0.524953	0.599616	0.722663
FvH4_1g18121	3.2426	1.9812	1.1268	1.75826	0.078704	0.146766
FvH4_1g18140	7.43198	2.16412	0.965592	2.24124	0.0250107	0.0564987
FvH4_1g18141	0.696866	4.09147	2.92931	1.39674	0.162493	NA
FvH4_1g18143	2.32202	0.449186	1.17609	0.381931	0.702512	0.805113
FvH4_1g18160	27.6907	1.87589	1.03431	1.81366	0.0697301	0.132855
FvH4_1g18170	754.902	6.71325	0.620255	10.8234	2.66794e-27	1.44129e-25
FvH4_1g18181	81.2231	6.28062	0.673575	9.32431	1.11712e-20	3.51159e-19
FvH4_1g18210	75.4887	0.652014	0.498903	1.30689	0.191249	0.302156
FvH4_1g18220	10.4177	2.01066	1.70018	1.18262	0.23696	0.358542
FvH4_1g18230	95.162	-2.32102	0.283948	-8.17412	2.9804e-16	6.36993e-15
FvH4_1g18250	252.219	0.381922	0.329522	1.15902	0.246449	0.369467
FvH4_1g18251	80.4191	-0.75779	0.349685	-2.16706	0.03023	0.0662091
FvH4_1g18260	34.1193	7.41959	1.52394	4.86867	1.1235e-06	7.19582e-06
FvH4_1g18270	58.1499	1.1831	1.09663	1.07885	NA	NA
FvH4_1g18280	64.3074	0.863007	0.697841	1.23668	0.216205	0.333175
FvH4_1g18300	588.925	2.79902	0.293338	9.54195	1.40169e-21	4.76865e-20
FvH4_1g18320	67.8864	0.917304	0.468391	1.95842	0.0501813	0.101329
FvH4_1g18321	3.63581	0	3.62515	0	1	1
FvH4_1g18350	382.846	0.444552	0.200898	2.21282	0.02691	0.0600885
FvH4_1g18360	776.288	-2.51189	0.315751	-7.95528	1.78725e-15	3.60147e-14
FvH4_1g18370	18.9967	-0.114507	0.41219	-0.277801	0.781165	0.866882
FvH4_1g18413	38.7477	-1.85384	0.475129	-3.90176	9.5497e-05	0.00042266
FvH4_1g18420	2.82509	-2.08499	1.06436	-1.95892	0.0501225	0.101229
FvH4_1g18480	73.1064	-0.162408	0.35232	-0.460966	0.644823	0.758813
FvH4_1g18481	1.19523	1.39324	1.72163	0.809256	0.418368	NA
FvH4_1g18482	2.00663	-0.111577	1.03414	-0.107893	0.914081	0.95708
FvH4_1g18500	2.45738	0	4.56215	0	1	1
FvH4_1g18510	397.892	0.429631	0.214825	1.99991	0.0455097	0.0934489
FvH4_1g18512	698.12	0.55169	0.360719	1.52942	0.126161	0.216625
FvH4_1g18520	516.384	0.593205	0.20807	2.85098	0.00435842	0.0125415
FvH4_1g18530	179.787	-3.41248	0.628852	-5.42651	5.74651e-08	4.58463e-07
FvH4_1g18540	58.5111	-1.06938	0.597268	-1.79046	0.0733799	0.138398
FvH4_1g18550	521.606	-4.75018	0.349363	-13.5967	4.18967e-42	5.00456e-40
FvH4_1g18560	267.866	0.11007	0.556625	0.197746	0.843244	0.911098
FvH4_1g18570	0.590235	0.859278	2.26711	0.379019	0.704673	NA
FvH4_1g18590	4.54658	-0.966777	2.03769	-0.474449	0.63518	0.751334
FvH4_1g18591	732.928	-0.430502	0.190384	-2.26124	0.0237446	0.0540709
FvH4_1g18620	955.131	-0.0268677	0.377008	-0.0712656	0.943186	0.97631
FvH4_1g18630	40.3424	1.35745	1.12208	1.20977	0.226369	0.345678
FvH4_1g18640	8.53344	-0.380139	0.702032	-0.541485	0.588173	0.713473
FvH4_1g18650	1.74184	-2.6669	1.71407	-1.55589	0.119734	0.207546
FvH4_1g18660	10144	-1.59572	0.613397	-2.60144	0.00928322	0.0241382
FvH4_1g18670	34.7112	-1.54624	0.371633	-4.16067	3.17319e-05	0.000155096
FvH4_1g18690	1592.49	1.10176	0.200473	5.49581	3.88912e-08	3.18795e-07
FvH4_1g18710	550.059	-0.83096	0.561881	-1.47889	0.13917	0.234616
FvH4_1g18740	1.81569	-1.2948	2.52382	-0.513034	0.607928	0.72974
FvH4_1g18760	259.047	-0.581184	0.295378	-1.9676	0.0491143	0.0995201
FvH4_1g18770	196.389	0.581287	0.314785	1.84662	0.0648025	0.125332
FvH4_1g18801	4.32733	1.32487	1.08336	1.22293	0.221357	0.339738
FvH4_1g18810	161.169	0.210369	0.314301	0.669323	0.503289	0.634899
FvH4_1g18820	506.211	0.22765	0.203314	1.1197	0.262841	0.388596
FvH4_1g18830	140.405	0.0666188	0.223347	0.298275	0.765493	0.855095
FvH4_1g18831	4.05887	-2.07874	1.05866	-1.96356	0.0495815	0.100353
FvH4_1g18840	9.74436	-0.647945	0.60635	-1.0686	0.28525	0.413565
FvH4_1g18850	339.881	-1.07919	0.364185	-2.96331	0.00304351	0.00915991
FvH4_1g18870	7.37813	-0.551467	0.752968	-0.732391	0.46393	0.597804
FvH4_1g18880	6.98526	-1.7261	0.785705	-2.19688	0.0280293	0.0621489
FvH4_1g18890	238.956	0.348763	0.246995	1.41202	0.157943	0.259291
FvH4_1g18891	380.508	-0.349452	0.781676	-0.447055	0.654835	0.766526
FvH4_1g18900	1947.68	0.526776	0.380011	1.38621	0.165682	0.269181
FvH4_1g18910	52.1198	-1.81724	0.992918	-1.8302	0.0672196	0.12909
FvH4_1g18920	7.83601	-1.14623	0.733959	-1.56171	0.118357	0.205557
FvH4_1g18930	209.595	-8.06769	0.890351	-9.06125	1.28961e-19	3.7119e-18
FvH4_1g18940	1357.94	0.137348	0.300732	0.456713	0.647878	0.761471
FvH4_1g18950	101.704	-0.126029	0.668521	-0.188519	0.85047	0.916451
FvH4_1g18970	1713.6	-0.805404	0.45285	-1.77852	0.0753184	0.141422
FvH4_1g18980	110.433	-1.49074	0.377891	-3.9449	7.98335e-05	0.000359025
FvH4_1g18990	120.517	-0.51047	0.276665	-1.84508	0.0650257	0.125634
FvH4_1g19010	54.3856	-2.0056	0.279778	-7.16854	7.57998e-13	1.16746e-11
FvH4_1g19030	1.84332	0.38968	1.03737	0.375642	0.707183	0.808999
FvH4_1g19040	139.072	-1.15275	0.307362	-3.75045	0.000176519	0.000730996
FvH4_1g19050	1380.26	1.32355	0.182194	7.2645	3.74413e-13	6.04828e-12
FvH4_1g19090	1347.57	-2.97233	0.453241	-6.55794	5.4555e-11	6.72199e-10
FvH4_1g19100	10.0648	-0.404861	1.92703	-0.210096	0.833593	0.905016
FvH4_1g19111	1.21371	1.07651	2.42942	0.443115	0.657683	NA
FvH4_1g19120	31.6181	-0.864192	0.479977	-1.80049	0.0717835	0.135941
FvH4_1g19140	20.3182	0.139866	0.472684	0.295898	0.767308	0.856321
FvH4_1g19141	12.7324	-0.611549	0.613158	-0.997376	0.318582	0.450055
FvH4_1g19142	26.8962	-0.606028	0.56541	-1.07184	0.283793	0.412092
FvH4_1g19160	1.54185	-0.97772	1.36974	-0.713798	0.475352	0.608304
FvH4_1g19171	9.01037	-5.33978	1.42171	-3.75588	0.000172733	0.000716562
FvH4_1g19194	4.92326	-1.21489	1.43677	-0.845575	0.39779	0.532459
FvH4_1g19210	5528.68	2.90728	0.496915	5.85066	4.89622e-09	4.65195e-08
FvH4_1g19240	1064.47	12.0363	1.53194	7.85688	3.93827e-15	7.65613e-14
FvH4_1g19261	610.405	7.89964	0.507846	15.5552	1.46721e-54	3.18651e-52
FvH4_1g19262	12.259	4.57379	1.15722	3.95239	7.73748e-05	0.000349247
FvH4_1g19265	5874.96	10.8497	0.919813	11.7955	4.11641e-32	2.97003e-30
FvH4_1g19280	159.444	11.8287	1.41715	8.34683	7.01195e-17	1.58532e-15
FvH4_1g19281	18190.3	10.9119	0.336864	32.3926	3.48748e-230	3.74922e-226
FvH4_1g19290	90.5144	-1.46478	0.514865	-2.84498	0.00444143	0.0127429
FvH4_1g19310	10.9241	-2.87047	1.84973	-1.55183	0.120702	0.208871
FvH4_1g19311	36.5	-3.48274	0.670765	-5.19219	2.07834e-07	1.51274e-06
FvH4_1g19312	1.01439	-4.20856	2.24177	-1.87734	0.0604719	NA
FvH4_1g19320	141.763	0.241723	0.525648	0.459856	0.64562	0.759338
FvH4_1g19321	25.4389	-2.33419	0.558904	-4.17636	2.96209e-05	0.000145839
FvH4_1g19330	189.982	0.0535468	0.211639	0.25301	0.800261	0.881928
FvH4_1g19340	251.582	0.388929	0.390967	0.99479	0.319839	0.451148
FvH4_1g19380	11.4907	0.827075	0.521811	1.58501	0.112964	0.197644
FvH4_1g19381	0.807787	3.98484	2.33808	1.70432	0.0883207	NA
FvH4_1g19382	2.42681	1.53093	2.04067	0.750208	0.45313	0.587565
FvH4_1g19390	449.815	2.73758	0.447985	6.11088	9.90818e-10	1.04429e-08
FvH4_1g19400	230.307	3.61588	0.590194	6.12659	8.97825e-10	9.51411e-09
FvH4_1g19420	0.84799	-0.404858	4.56215	-0.0887427	0.929286	NA
FvH4_1g19460	13.2422	2.78757	1.51769	1.83672	0.0662512	0.127515
FvH4_1g19470	67.2479	0.483179	0.440536	1.0968	0.27273	0.400134
FvH4_1g19471	159.954	0.824795	0.255065	3.23366	0.00122215	0.00408226
FvH4_1g19480	183.422	9.86963	0.767299	12.8628	7.2861e-38	7.18617e-36
FvH4_1g19490	159.627	0.374826	0.523794	0.715597	0.47424	0.607413
FvH4_1g19500	57.0635	-3.50006	0.754988	-4.63591	3.55371e-06	2.09395e-05
FvH4_1g19520	149.862	0.296373	0.35093	0.844536	0.39837	0.533102
FvH4_1g19530	17.8381	-3.5974	0.621622	-5.78711	7.16074e-09	6.62491e-08
FvH4_1g19540	16.3179	-4.55615	1.38834	-3.28172	0.00103174	0.00352008
FvH4_1g19550	128.112	-4.83248	0.923181	-5.2346	1.65346e-07	1.22463e-06
FvH4_1g19561	0.820526	-0.332748	2.63198	-0.126425	0.899396	NA
FvH4_1g19562	13.846	-0.111112	1.21615	-0.091364	0.927203	0.965451
FvH4_1g19563	67.2217	-0.1148	0.40562	-0.283023	0.777159	0.864086
FvH4_1g19570	43.5843	0.574314	0.39945	1.43776	0.150502	0.24961
FvH4_1g19590	215.658	0.864053	0.260695	3.31442	0.000918333	0.00318161
FvH4_1g19600	58.3806	0.52683	0.559578	0.941477	0.34646	0.478706
FvH4_1g19610	197	1.13863	0.383603	2.96825	0.00299499	0.0090392
FvH4_1g19620	193.126	-2.27397	0.482084	-4.71696	2.39392e-06	1.45482e-05
FvH4_1g19623	2.38613	0.699073	1.24524	0.561397	0.574527	0.700874
FvH4_1g19630	188.678	0.633227	0.425314	1.48885	0.136528	0.231086
FvH4_1g19631	2.574	-3.49723	2.22243	-1.57361	0.115579	0.201595
FvH4_1g19640	83.2914	0.174186	0.389251	0.44749	0.654521	0.766287
FvH4_1g19670	241.294	0.350148	0.36986	0.946705	0.343789	0.476093
FvH4_1g19680	708.935	-0.341937	0.287337	-1.19002	0.234038	0.35477
FvH4_1g19690	551.58	-1.85103	0.27694	-6.68386	2.32732e-11	2.9946e-10
FvH4_1g19710	34.9523	-0.404862	1.74313	-0.232262	0.816335	0.893232
FvH4_1g19720	461.654	-0.0731953	0.210815	-0.347201	0.728441	0.826657
FvH4_1g19730	523.309	0.647317	0.327211	1.97829	0.0478963	0.0974997
FvH4_1g19740	125.538	0.458427	0.262244	1.74809	0.0804486	0.149449
FvH4_1g19770	0.646059	-1.61387	3.46486	-0.465782	0.641372	NA
FvH4_1g19790	20.0806	3.3603	0.933383	3.60013	0.000318056	0.00123662
FvH4_1g19810	1.25846	2.27589	1.96757	1.1567	0.247394	NA
FvH4_1g19820	77.6396	-0.77335	0.283172	-2.73102	0.00631385	0.0172693
FvH4_1g19830	246.887	-0.0991783	0.146409	-0.677406	0.498148	0.629818
FvH4_1g19840	2699.82	0.547513	0.312514	1.75196	0.0797802	0.148426
FvH4_1g19860	36.9966	1.10376	0.254575	4.33571	1.45292e-05	7.6361e-05
FvH4_1g19880	27.6358	-0.219635	0.581077	-0.377979	0.705446	0.807442
FvH4_1g19890	325.807	0.235456	0.311295	0.756376	0.449424	0.583871
FvH4_1g19920	993.489	-1.24441	0.364443	-3.41455	0.000638876	0.00231293
FvH4_1g19921	4.61749	1.23699	0.737647	1.67694	0.093555	0.169492
FvH4_1g19960	8.89051	-1.71513	1.1163	-1.53645	0.124427	0.214179
FvH4_1g19970	133.371	-1.21238	0.350027	-3.46369	0.000532818	0.00196976
FvH4_1g19980	317.587	1.23592	0.204683	6.03821	1.55834e-09	1.59248e-08
FvH4_1g19990	180.329	0.514251	0.547502	0.939268	0.347593	0.479704
FvH4_1g20010	252.248	0.156005	1.16426	0.133995	0.893407	0.94366
FvH4_1g20030	9.6497	-0.404861	2.2324	-0.181357	0.856088	0.920153
FvH4_1g20040	8.17864	-5.0028	1.43551	-3.48504	0.000492068	0.00183381
FvH4_1g20050	319.353	1.19254	0.165861	7.18999	6.47949e-13	1.00953e-11
FvH4_1g20060	1830.06	1.96512	0.417633	4.70538	2.53388e-06	1.53468e-05
FvH4_1g20090	22.6919	-2.61805	0.410259	-6.38146	1.75404e-10	2.03637e-09
FvH4_1g20100	154.164	-0.620622	0.520078	-1.19332	0.232742	0.353209
FvH4_1g20110	27.3942	1.84201	0.653992	2.81656	0.00485415	0.0137599
FvH4_1g20130	23.7889	-8.32355	1.25687	-6.62243	3.53348e-11	4.42477e-10
FvH4_1g20140	296.107	0.0943906	0.446323	0.211485	0.832509	0.904075
FvH4_1g20150	61.9668	-0.568642	0.311987	-1.82265	0.068357	0.130702
FvH4_1g20160	45.8301	9.79301	1.23901	7.90389	2.70336e-15	5.37697e-14
FvH4_1g20164	273.864	1.17607	0.181501	6.47971	9.19004e-11	1.10884e-09
FvH4_1g20180	17.0623	-3.28202	0.523367	-6.27098	3.58788e-10	4.00951e-09
FvH4_1g20190	203.627	-2.63992	0.289456	-9.12026	7.49409e-20	2.19524e-18
FvH4_1g20200	343.694	1.32015	0.221693	5.95485	2.60312e-09	2.58254e-08
FvH4_1g20220	195.451	-0.173092	0.178729	-0.968466	0.332812	0.464692
FvH4_1g20221	189.096	-0.240411	0.293747	-0.818431	0.413111	0.547884
FvH4_1g20230	3117.42	-0.898333	0.241136	-3.72542	0.000194991	0.000800098
FvH4_1g20240	373.428	1.0818	0.295478	3.6612	0.00025104	0.00100197
FvH4_1g20250	345.286	1.13876	0.219749	5.18208	2.19428e-07	1.59013e-06
FvH4_1g20260	505.209	0.820181	0.164321	4.99133	5.99645e-07	4.05057e-06
FvH4_1g20270	5217.02	0.207468	0.396525	0.523215	0.600824	0.723675
FvH4_1g20280	12.8557	0.00779019	0.472499	0.0164872	0.986846	1
FvH4_1g20290	71.7871	2.56358	0.593316	4.32076	1.55493e-05	8.13839e-05
FvH4_1g20300	2160.05	1.73213	0.422776	4.09704	4.18473e-05	0.000199018
FvH4_1g20310	869.132	-0.292274	0.217871	-1.3415	0.179759	0.287275
FvH4_1g20311	1.22384	-1.27573	2.76067	-0.46211	0.644003	NA
FvH4_1g20330	1.10343	-2.92476	2.08112	-1.40538	0.15991	NA
FvH4_1g20340	2238.41	-0.349416	0.221165	-1.57988	0.114133	0.199397
FvH4_1g20350	3.4524	0.808573	0.856099	0.944485	0.344922	0.477231
FvH4_1g20360	318.554	-6.05081	0.319696	-18.9268	6.8628e-80	3.35357e-77
FvH4_1g20370	438.493	0.286444	0.154928	1.84889	0.0644743	0.12481
FvH4_1g20380	626.092	-0.377941	0.484283	-0.780415	0.435147	0.570057
FvH4_1g20390	131.746	-1.30601	0.566708	-2.30455	0.0211917	0.0491843
FvH4_1g20400	313.972	1.16961	0.612402	1.90987	0.05615	0.111404
FvH4_1g20410	23.5826	7.14637	1.13895	6.27452	3.50721e-10	3.92753e-09
FvH4_1g20420	42.512	-1.02011	0.53097	-1.92121	0.0547052	0.10906
FvH4_1g20430	28.8386	0.948188	0.405173	2.3402	0.0192732	0.0454279
FvH4_1g20440	148.115	0.729884	0.193452	3.77296	0.000161324	0.000676014
FvH4_1g20450	2647.37	2.20246	0.592311	3.71841	0.000200479	0.000819956
FvH4_1g20470	7.7316	0.44399	1.55225	0.286031	0.774855	0.862327
FvH4_1g20490	419.404	1.35612	0.311607	4.35202	1.34887e-05	7.13282e-05
FvH4_1g20510	54.7453	-0.538866	0.325661	-1.65468	0.097989	0.176071
FvH4_1g20520	247.79	-0.360912	0.209089	-1.72612	0.0843267	0.155525
FvH4_1g20540	0.9021	2.21917	2.0109	1.10357	0.26978	NA
FvH4_1g20560	20.7461	-4.3342	1.3353	-3.24586	0.00117098	0.00392657
FvH4_1g20570	104.17	-2.9349	0.809416	-3.62595	0.000287904	0.00113146
FvH4_1g20572	11.0211	2.30717	1.274	1.81096	0.0701466	0.133447
FvH4_1g20573	2.08405	3.3443	2.29786	1.4554	0.145559	0.243176
FvH4_1g20600	8.23515	-2.89994	1.12618	-2.57502	0.0100235	0.0257701
FvH4_1g20610	34.802	-2.57057	0.457843	-5.61453	1.97094e-08	1.70258e-07
FvH4_1g20620	3.02465	0.263834	0.905215	0.29146	0.770699	0.858902
FvH4_1g20630	19.0146	0.423539	0.466617	0.907681	0.364047	0.49745
FvH4_1g20640	555.832	0.358697	0.251757	1.42478	0.154222	0.254328
FvH4_1g20670	534.478	0.828924	0.311769	2.65877	0.00784259	0.0208203
FvH4_1g20680	3.99506	-1.34502	2.40882	-0.558373	0.57659	0.702673
FvH4_1g20700	322.888	1.06848	0.275776	3.87445	0.000106865	0.000468154
FvH4_1g20710	367.658	-1.69804	0.319392	-5.31647	1.05798e-07	8.08372e-07
FvH4_1g20720	361.374	0.67459	0.145958	4.62182	3.80396e-06	2.22919e-05
FvH4_1g20721	47.9094	-1.99271	0.342939	-5.81069	6.22172e-09	5.8197e-08
FvH4_1g20730	637.613	0.368378	0.19552	1.88409	0.0595528	0.116989
FvH4_1g20740	155.47	0.921806	0.300804	3.06448	0.00218049	0.00682726
FvH4_1g20750	0.834119	1.55067	1.76832	0.876918	0.380531	NA
FvH4_1g20790	653.551	-0.146239	0.27267	-0.536324	0.591735	0.716137
FvH4_1g20800	180.954	0.49795	0.162683	3.06086	0.00220704	0.0068953
FvH4_1g20810	41.4438	-0.0892151	0.434211	-0.205465	0.837209	0.907529
FvH4_1g20820	51.4509	-3.83946	0.397128	-9.66809	4.12015e-22	1.47155e-20
FvH4_1g20821	52.1702	-4.14316	0.455848	-9.0889	1.00042e-19	2.89503e-18
FvH4_1g20830	17.6542	-4.36943	0.911594	-4.79317	1.64165e-06	1.02074e-05
FvH4_1g20840	79.8389	0.45042	0.542574	0.830154	0.406451	0.541189
FvH4_1g20860	22.6007	1.66356	0.616009	2.70054	0.00692273	0.0187345
FvH4_1g20880	280.054	0.167824	0.352777	0.475721	0.634273	0.75078
FvH4_1g20890	312.694	0.41986	0.323876	1.29636	0.194852	0.306825
FvH4_1g20891	2.98777	-0.208454	1.10286	-0.189011	0.850084	0.916173
FvH4_1g20900	8.07641	0.671003	0.903164	0.742947	0.457514	0.591628
FvH4_1g20910	492.804	-0.575148	0.279384	-2.05863	0.0395298	0.0828866
FvH4_1g20920	144.558	-0.614243	0.367675	-1.67062	0.0947975	0.171324
FvH4_1g20930	2424.34	-4.34816	0.374656	-11.6057	3.854e-31	2.63063e-29
FvH4_1g20950	296.692	-0.581413	0.228205	-2.54776	0.0108416	0.0275897
FvH4_1g20970	47.6699	-0.123199	0.590607	-0.208597	0.834763	0.905882
FvH4_1g21000	4.80518	1.51873	2.06859	0.734184	0.462836	0.596896
FvH4_1g21001	3.27323	-1.54356	1.20344	-1.28263	0.199621	0.312663
FvH4_1g21020	148.32	-7.01129	0.770785	-9.0963	9.34585e-20	2.71181e-18
FvH4_1g21070	217.874	-0.990879	0.335099	-2.95698	0.00310673	0.00931949
FvH4_1g21100	4.15669	-0.404861	2.54612	-0.159011	0.87366	0.931959
FvH4_1g21110	317.867	1.21832	0.479173	2.54255	0.0110048	0.0279554
FvH4_1g21130	115.086	0.525274	0.314181	1.67188	0.0945474	0.170986
FvH4_1g21140	10.6606	-0.532573	0.604996	-0.880292	0.378701	0.513169
FvH4_1g21150	332.62	-6.25414	0.739532	-8.45688	2.74632e-17	6.50314e-16
FvH4_1g21170	3.59493	-5.21333	1.61289	-3.23229	0.00122802	0.00409994
FvH4_1g21180	1.74423	-3.35367	3.79746	-0.883133	0.377164	0.511699
FvH4_1g21190	7.82384	-0.163785	0.567359	-0.288679	0.772827	0.860605
FvH4_1g21200	240.216	-3.78335	0.67188	-5.631	1.7917e-08	1.55587e-07
FvH4_1g21201	0.763272	-1.63966	1.925	-0.851769	0.394343	NA
FvH4_1g21210	429.771	-0.433955	0.361406	-1.20074	0.229851	0.349829
FvH4_1g21220	23.625	-1.37972	0.423314	-3.25933	0.00111675	0.00376528
FvH4_1g21221	0.447493	-0.590337	2.68162	-0.220142	0.825761	NA
FvH4_1g21240	50.5625	-0.592273	0.292413	-2.02547	0.042819	0.0886094
FvH4_1g21250	815.843	3.84508	0.261365	14.7115	5.43598e-49	8.99069e-47
FvH4_1g21260	69.8514	-1.47939	0.393664	-3.758	0.000171277	0.000711206
FvH4_1g21290	1.99568	0.0219819	1.52214	0.0144414	0.988478	1
FvH4_1g21310	11.1108	0.63862	0.585501	1.09072	0.275394	0.403163
FvH4_1g21340	30.4423	-4.92366	1.06407	-4.62719	3.70667e-06	2.17633e-05
FvH4_1g21360	0.984791	2.56782	2.33185	1.1012	0.270811	NA
FvH4_1g21402	52.9716	-0.801645	0.786253	-1.01958	0.307929	0.438115
FvH4_1g21410	56.5776	-0.791829	0.296142	-2.67382	0.00749928	0.0200675
FvH4_1g21430	408.509	-1.0056	0.232829	-4.31902	1.56721e-05	8.19468e-05
FvH4_1g21440	907.451	-0.88814	0.268636	-3.30611	0.000946012	0.00326488
FvH4_1g21450	5300.37	2.66232	0.724196	3.67625	0.000236691	0.00095355
FvH4_1g21480	12.1325	-4.39698	1.10315	-3.98585	6.72392e-05	0.000307336
FvH4_1g21490	5.56748	-1.67298	0.929102	-1.80064	0.0717596	0.135915
FvH4_1g21500	564.693	-0.093381	0.258671	-0.361004	0.718097	0.818162
FvH4_1g21520	1.77959	-1.46219	1.22586	-1.19279	0.232951	0.35342
FvH4_1g21530	209.462	-0.337198	0.327385	-1.02997	0.303022	0.432793
FvH4_1g21540	15.8211	-3.47154	0.856048	-4.05531	5.00688e-05	0.000234181
FvH4_1g21600	31.5127	-2.33368	0.520162	-4.48644	7.2422e-06	4.0351e-05
FvH4_1g21630	180.467	-5.74796	0.69532	-8.26664	1.37786e-16	3.03849e-15
FvH4_1g21640	40.2622	-1.70375	0.497254	-3.42631	0.000611831	0.00222777
FvH4_1g21650	67.0889	-0.678253	0.296138	-2.29033	0.0220024	0.0507425
FvH4_1g21660	1148.42	-1.04032	0.491406	-2.11703	0.034257	0.0735136
FvH4_1g21670	453.709	0.769284	0.259791	2.96116	0.00306481	0.00921887
FvH4_1g21690	89.0783	0.361619	0.280772	1.28794	0.197766	0.310558
FvH4_1g21700	52.5254	0.109115	0.547496	0.199299	0.842029	0.910548
FvH4_1g21730	287.032	1.15906	0.485438	2.38766	0.0169563	0.0406939
FvH4_1g21740	815.881	0.785441	0.512275	1.53324	0.125217	0.215331
FvH4_1g21750	306.514	-0.365345	0.348221	-1.04918	0.294097	0.423365
FvH4_1g21760	144.643	0.366771	0.508569	0.721181	0.470798	0.6043
FvH4_1g21770	47.6856	-1.11143	0.768712	-1.44583	0.148225	0.246689
FvH4_1g21780	68.0522	-3.62493	0.600634	-6.03516	1.58802e-09	1.62204e-08
FvH4_1g21810	153.062	-0.121212	0.261571	-0.463401	0.643077	0.757508
FvH4_1g21830	5.91117	-1.52259	1.34327	-1.1335	0.257005	0.381939
FvH4_1g21840	265.959	0.124473	0.455476	0.273282	0.784636	0.869567
FvH4_1g21870	299.554	0.211091	0.407811	0.517621	0.604723	0.727189
FvH4_1g21880	10.1997	0.8349	0.458133	1.8224	0.0683948	0.130741
FvH4_1g21890	682.939	-1.70485	0.474032	-3.59648	0.000322548	0.00125115
FvH4_1g21900	208.609	1.01485	0.459755	2.20737	0.0272884	0.0607315
FvH4_1g21910	180.642	1.2497	0.185227	6.74684	1.51097e-11	2.00415e-10
FvH4_1g21920	875.439	0.13852	0.255302	0.542574	0.587423	0.712925
FvH4_1g21921	1.38384	-3.15098	1.92348	-1.63816	0.101388	0.180868
FvH4_1g21940	32.7065	-1.28775	0.427351	-3.01333	0.00258399	0.00792897
FvH4_1g21941	2.95914	-1.20881	1.60293	-0.754129	0.450772	0.585233
FvH4_1g21950	130.773	-1.87239	0.438815	-4.26693	1.9818e-05	0.000101069
FvH4_1g21970	122.074	-0.406803	0.234317	-1.73612	0.0825418	0.152757
FvH4_1g21980	16.2619	-2.19269	0.610001	-3.59456	0.000324939	0.00126019
FvH4_1g22020	196.39	5.81364	0.618694	9.39663	5.63365e-21	1.81875e-19
FvH4_1g22042	6.41171	-1.51077	0.730637	-2.06775	0.0386638	0.0813734
FvH4_1g22043	19.2907	-0.717348	0.436936	-1.64177	0.100638	0.179883
FvH4_1g22044	17.9703	-0.528419	0.597634	-0.884186	0.376596	0.51109
FvH4_1g22060	149.343	-0.246089	0.448659	-0.5485	0.583348	0.708843
FvH4_1g22080	882.342	-0.569273	0.266876	-2.1331	0.0329162	0.0711359
FvH4_1g22090	103.676	0.768315	0.359608	2.13653	0.0326359	0.0706082
FvH4_1g22100	11.1996	-2.57938	0.688438	-3.74671	0.000179167	0.00074139
FvH4_1g22110	7.48015	-1.68055	1.28001	-1.31292	0.18921	0.299485
FvH4_1g22140	337.133	0.539924	0.377748	1.42932	0.152912	0.252632
FvH4_1g22150	410.541	1.27452	0.454707	2.80294	0.00506392	0.0142718
FvH4_1g22160	23.108	-0.780518	0.390686	-1.99782	0.0457366	0.0938601
FvH4_1g22161	127.741	-0.000930813	0.299665	-0.00310618	0.997522	1
FvH4_1g22170	104.778	-0.108936	0.221484	-0.491848	0.622827	0.741306
FvH4_1g22180	1.31288	-1.27392	3.03745	-0.419405	0.67492	0.782628
FvH4_1g22200	215.221	0.0577197	0.290383	0.198771	0.842442	0.910723
FvH4_1g22210	34.9905	-6.05442	0.842863	-7.18316	6.81198e-13	1.05809e-11
FvH4_1g22220	717.396	0.355972	0.47622	0.747495	0.454765	0.589204
FvH4_1g22221	2.7963	1.15198	1.20149	0.958793	0.337663	0.469696
FvH4_1g22230	447.58	0.609789	0.211643	2.88121	0.00396151	0.0115478
FvH4_1g22240	569.846	0.986081	0.353245	2.79149	0.00524653	0.014717
FvH4_1g22250	293.445	-0.794446	0.319895	-2.48346	0.0130113	0.0322337
FvH4_1g22260	64.4703	-4.53408	0.801991	-5.65353	1.57188e-08	1.3761e-07
FvH4_1g22270	49.5106	-0.3851	0.3947	-0.975677	0.329224	0.46079
FvH4_1g22290	121.517	-0.505709	0.376787	-1.34216	0.179544	0.287059
FvH4_1g22291	197.282	0.494855	0.52787	0.937456	0.348524	0.480778
FvH4_1g22320	23.9007	-0.256853	0.688948	-0.372819	0.709283	0.810587
FvH4_1g22350	48.7308	-0.820435	0.633396	-1.2953	0.195218	0.307186
FvH4_1g22390	15.2758	-0.234088	0.417918	-0.560128	0.575392	0.701651
FvH4_1g22400	5.98119	0.92777	0.755723	1.22766	0.219575	0.337353
FvH4_1g22401	5.89291	-4.31863	0.937019	-4.6089	4.04805e-06	2.35554e-05
FvH4_1g22410	50.09	-0.575833	0.355417	-1.62016	0.105197	0.18656
FvH4_1g22430	28.9267	0.191838	0.572566	0.335049	0.737588	0.834049
FvH4_1g22440	1397.02	0.475166	0.433365	1.09646	0.272879	0.400325
FvH4_1g22450	215.633	-0.205383	0.378709	-0.542325	0.587594	0.713093
FvH4_1g22460	44.6144	-0.204636	0.420747	-0.486363	0.62671	0.744469
FvH4_1g22461	10.1058	-1.1261	0.623574	-1.80588	0.0709375	0.134702
FvH4_1g22470	145.643	0.37397	0.435874	0.857977	0.390905	0.525632
FvH4_1g22471	20.4328	0.0808048	0.580972	0.139086	0.889383	0.941676
FvH4_1g22472	20.9745	0.111367	0.798109	0.139538	0.889025	0.941436
FvH4_1g22490	110.061	0	1.83065	0	1	1
FvH4_1g22500	3.53786	1.50469	1.03107	1.45935	0.14447	0.241656
FvH4_1g22510	6.20019	-0.82067	0.922838	-0.889289	0.373848	0.508112
FvH4_1g22550	5.9736	-0.221675	0.730023	-0.303655	0.761391	0.851779
FvH4_1g22570	604.821	0.0799395	0.477067	0.167565	0.866926	0.927952
FvH4_1g22580	418.66	0.0641006	0.501182	0.127899	0.898229	0.947023
FvH4_1g22590	1326.98	-0.039849	0.251637	-0.158359	0.874174	0.932183
FvH4_1g22591	761.044	-0.165346	0.290548	-0.569083	0.5693	0.696156
FvH4_1g22620	422.577	-0.258556	0.319109	-0.810242	0.417801	0.552469
FvH4_1g22650	352.765	0.630809	0.251612	2.50707	0.0121737	0.030535
FvH4_1g22670	56.9189	-0.893784	0.40793	-2.19102	0.0284503	0.0629654
FvH4_1g22680	179.074	0.0948822	0.441269	0.215021	0.829751	0.902543
FvH4_1g22681	3.58895	3.02914	1.79014	1.69212	0.0906223	0.165237
FvH4_1g22710	201.196	1.26707	0.385803	3.28424	0.00102258	0.00349374
FvH4_1g22720	160.306	-1.05125	0.494103	-2.12759	0.0333709	0.0719812
FvH4_1g22730	137.33	1.65278	0.416235	3.97078	7.16373e-05	0.000325433
FvH4_1g22740	148.287	0.511997	0.366615	1.39655	0.162548	0.26501
FvH4_1g22750	1029.09	-0.0334504	0.384469	-0.0870041	0.930668	0.967476
FvH4_1g22760	2.72696	0.0577903	1.17301	0.0492667	0.960707	0.98878
FvH4_1g22770	160.328	-0.0795908	0.501165	-0.158811	0.873817	0.932034
FvH4_1g22780	162.66	2.33274	0.639972	3.64507	0.000267324	0.00106027
FvH4_1g22810	367.216	-0.0925571	0.303706	-0.304758	0.76055	0.851224
FvH4_1g22820	44.0907	-4.03402	0.599482	-6.72916	1.7064e-11	2.24125e-10
FvH4_1g22830	0.457822	-3.86909	4.22894	-0.914906	0.360241	NA
FvH4_1g22870	10.9278	-0.779142	1.40673	-0.553869	0.579669	0.705715
FvH4_1g22880	57.2248	-0.774213	0.417268	-1.85543	0.0635343	0.123368
FvH4_1g22881	231.634	-0.871364	0.392674	-2.21905	0.0264832	0.0593079
FvH4_1g22890	2361.27	-0.0231817	0.360895	-0.0642339	0.948784	0.980306
FvH4_1g22900	4.71504	-3.53401	1.99324	-1.773	0.0762292	0.14292
FvH4_1g22910	235.024	0.975977	0.32409	3.01144	0.00260012	0.00797166
FvH4_1g22920	258.13	-1.00711	0.258706	-3.89288	9.90615e-05	0.000436907
FvH4_1g22940	33.1409	-1.67948	0.341381	-4.91966	8.66966e-07	5.6762e-06
FvH4_1g22950	1.71896	0	2.16593	0	1	1
FvH4_1g22971	44.0673	-0.696414	0.3219	-2.16345	0.0305068	0.0667271
FvH4_1g22980	3.46188	-0.829732	0.894962	-0.927114	0.353867	0.48629
FvH4_1g22990	1.93278	-2.67511	2.15049	-1.24396	0.213516	0.329949
FvH4_1g23000	84.9804	-2.13692	0.508225	-4.20468	2.61456e-05	0.000130129
FvH4_1g23030	0.525108	-4.09111	4.04957	-1.01026	0.312372	NA
FvH4_1g23040	187.554	0.378465	0.294013	1.28724	0.198011	0.310852
FvH4_1g23050	675.755	1.17594	0.412301	2.85215	0.00434251	0.0125008
FvH4_1g23080	737.528	0.167687	0.410437	0.408556	0.682865	0.789166
FvH4_1g23082	392.18	0.71984	0.373382	1.92789	0.0538683	0.107621
FvH4_1g23130	773.85	-0.276829	0.424602	-0.651974	0.514418	0.645194
FvH4_1g23140	1150.54	1.7699	0.380473	4.65184	3.2899e-06	1.95134e-05
FvH4_1g23150	635.327	2.97913	0.190509	15.6377	4.03004e-55	9.12104e-53
FvH4_1g23160	61.867	4.03355	0.388828	10.3736	3.26903e-25	1.52799e-23
[truncated: 20,531 more rows]

## Sheet: Fvesca_AZA_vs_control_genes
Gene_ID	baseMean	log2FoldChange	lfcSE	stat	pvalue	padj
[truncated: 22,305 more rows]
